# Supplementary material for: Profiling neural editomes reveals a molecular mechanism to regulate RNA editing during development
Source: HighWire-hosted journal article supplement (doi:10.1101/gr.267575.120), 2020-12-18
Supplement: Supplemental_Table_S1.xlsx [file Supplemental_Table_S1.xlsx]

## Sheet: Adult neural transcriptome
Supplemental Table 1: Comparison of adult neural transcriptome from the current study to the previously published adult neural transcriptome (Kaletsky et al. 2018) (related to Supplemental Fig. S2B) Expression of all genes in the neural RNA-sequencing datasets from six biological replicates from (Kaletsky et al. 2018) and three biological replicates from the current study are listed by gene name …
Gene Name	Gene ID	log2FoldChange	pvalue	padj	Kaletsky et al 2018 rep.1	Kaletsky et al 2018 rep.2	Kaletsky et al 2018 rep.3	Kaletsky et al 2018 rep.4	Kaletsky et al 2018 rep.5	Kaletsky et al 2018 rep.6	Our rep.1	Our rep.2	Our rep.3
21ur-10010	WBGene00170437	4.91841	0.160286	NA	0.24768	0	0	0	0	0	0	0	0
21ur-10023	WBGene00170947	5.02302	0.15153	NA	0.49536	0	0	0	0	0	0	0	0
21ur-10038	WBGene00165395	4.9204	0.160115	NA	0	0.252225	0	0	0	0	0	0	0
21ur-10061	WBGene00174944	6.31322	0.0568364	0.114702	2.72448	1.26112	0	4.80455	0	0	0	0	0
21ur-10073	WBGene00168494	4.91841	0.160286	NA	0.24768	0	0	0	0	0	0	0	0
21ur-10079	WBGene00174951	5.34796	0.126658	NA	0.49536	1.0089	0	0	0	0	0	0	0
21ur-10091	WBGene00165046	4.9204	0.160115	NA	0	0.252225	0	0	0	0	0	0	0
21ur-10093	WBGene00169829	10.3238	6.84729e-05	0.00043969	0.24768	0	0	153.746	47.3602	15.1728	0	0	0
21ur-10097	WBGene00171378	4.91841	0.160286	NA	0.24768	0	0	0	0	0	0	0	0
21ur-10105	WBGene00168790	8.38174	0.0155639	0.042869	0.24768	0	0	0	59.2002	0	0	0	0
21ur-10110	WBGene00173788	5.34796	0.126658	NA	0.49536	1.0089	0	0	0	0	0	0	0
21ur-10116	WBGene00170805	5.50851	0.115608	NA	0	0	0	4.80455	0	0	0	0	0
21ur-10117	WBGene00172611	7.53605	0.0303197	0.0714685	0	0	0	28.8273	0	0	0	0	0
21ur-10120	WBGene00165600	5.11703	0.143978	NA	0.49536	0.252225	0	0	0	0	0	0	0
21ur-10155	WBGene00167785	5.58596	0.110557	0.185159	0.24768	0	0	0	11.84	0	0	0	0
21ur-10174	WBGene00172244	5.50851	0.115608	0.185995	0	0	0	0	11.84	0	0	0	0
21ur-10175	WBGene00167780	5.02651	0.151245	NA	0	0.50445	0	0	0	0	0	0	0
21ur-102	WBGene00046231	4.91841	0.160286	NA	0.24768	0	0	0	0	0	0	0	0
21ur-10209	WBGene00173818	11.414	1.18732e-10	3.36475e-09	13.8701	8.82787	3.79898	196.986	153.921	91.0365	0	0	0
21ur-10214	WBGene00172518	5.19849	0.137672	NA	0.99072	0	0	0	0	0	0	0	0
21ur-10235	WBGene00168978	6.25997	0.0734806	0.135577	0	0	0	9.60909	0	0	0	0	0
21ur-10237	WBGene00165067	4.91841	0.160286	NA	0.24768	0	0	0	0	0	0	0	0
21ur-10243	WBGene00170604	4.9204	0.160115	NA	0	0.252225	0	0	0	0	0	0	0
21ur-10255	WBGene00171470	6.25997	0.0734806	0.135577	0	0	0	0	23.6801	0	0	0	0
21ur-10257	WBGene00171240	8.06718	0.0201468	0.0522624	0	0	0	33.6318	11.84	0	0	0	0
21ur-10289	WBGene00169862	10.622	7.59327e-08	1.15716e-06	1.73376	1.76557	3.79898	163.355	23.6801	75.8638	0	0	0
21ur-10311	WBGene00174884	4.91841	0.160286	NA	0.24768	0	0	0	0	0	0	0	0
21ur-10312	WBGene00169205	4.91841	0.160286	NA	0.24768	0	0	0	0	0	0	0	0
21ur-10329	WBGene00165896	7.13148	0.01452	0.0405257	1.2384	0	0	4.80455	0	30.3455	0	0	0
21ur-10332	WBGene00172630	5.46792	0.118328	NA	1.73376	0.252225	0	0	0	0	0	0	0
21ur-10368	WBGene00168218	4.9204	0.160115	NA	0	0.252225	0	0	0	0	0	0	0
21ur-10378	WBGene00171384	10.3104	4.74511e-05	0.000321592	0	0.252225	0	28.8273	71.0403	121.382	0	0	0
21ur-10380	WBGene00165748	5.41388	0.122026	NA	0.24768	1.51335	0	0	0	0	0	0	0
21ur-10388	WBGene00170144	4.9204	0.160115	NA	0	0.252225	0	0	0	0	0	0	0
21ur-10389	WBGene00169452	8.10668	0.00324236	0.0118567	1.48608	0.756675	0	43.2409	0	0	0	0	0
21ur-10391	WBGene00165244	5.20132	0.137457	NA	0.49536	0.50445	0	0	0	0	0	0	0
21ur-10395	WBGene00168782	5.02302	0.15153	NA	0.49536	0	0	0	0	0	0	0	0
21ur-10399	WBGene00170872	8.58545	0.00233674	0.00902472	0.74304	0.50445	0	62.4591	0	0	0	0	0
21ur-10402	WBGene00165993	4.9204	0.160115	NA	0	0.252225	0	0	0	0	0	0	0
21ur-10415	WBGene00170912	4.91841	0.160286	NA	0.24768	0	0	0	0	0	0	0	0
21ur-10434	WBGene00173228	5.02651	0.151245	NA	0	0.50445	0	0	0	0	0	0	0
21ur-10441	WBGene00174394	6.25997	0.0734806	0.135577	0	0	0	9.60909	0	0	0	0	0
21ur-10444	WBGene00170824	5.02477	0.151387	NA	0.24768	0.252225	0	0	0	0	0	0	0
21ur-10456	WBGene00174410	4.9204	0.160115	NA	0	0.252225	0	0	0	0	0	0	0
21ur-10466	WBGene00170860	4.91841	0.160286	NA	0.24768	0	0	0	0	0	0	0	0
21ur-10471	WBGene00171355	4.9204	0.160115	NA	0	0.252225	0	0	0	0	0	0	0
21ur-10480	WBGene00166294	8.81936	0.00947868	0.0286287	0	0	0	52.85	23.6801	0	0	0	0
21ur-10498	WBGene00172090	5.11547	0.144101	NA	0.74304	0	0	0	0	0	0	0	0
21ur-10502	WBGene00167984	5.02477	0.151387	NA	0.24768	0.252225	0	0	0	0	0	0	0
21ur-10510	WBGene00166211	5.11547	0.144101	NA	0.74304	0	0	0	0	0	0	0	0
21ur-10511	WBGene00168174	4.9204	0.160115	NA	0	0.252225	0	0	0	0	0	0	0
21ur-10517	WBGene00171265	5.02302	0.15153	NA	0.49536	0	0	0	0	0	0	0	0
21ur-10524	WBGene00174231	5.11703	0.143978	NA	0.49536	0.252225	0	0	0	0	0	0	0
21ur-10544	WBGene00171591	6.20081	0.0762976	0.139431	0	0	3.79898	0	11.84	0	0	0	0
21ur-10554	WBGene00165336	5.50851	0.115608	0.185995	0	0	0	0	11.84	0	0	0	0
21ur-10570	WBGene00172427	5.7061	0.0778928	0.141598	0.24768	0.50445	0	0	11.84	0	0	0	0
21ur-10594	WBGene00174577	4.91841	0.160286	NA	0.24768	0	0	0	0	0	0	0	0
21ur-106	WBGene00048489	5.20132	0.137457	NA	0.49536	0.50445	0	0	0	0	0	0	0
21ur-10609	WBGene00174568	5.50851	0.115608	NA	0	0	0	4.80455	0	0	0	0	0
21ur-10610	WBGene00169960	4.91841	0.160286	NA	0.24768	0	0	0	0	0	0	0	0
21ur-10612	WBGene00165834	6.25997	0.0734806	0.135577	0	0	0	0	23.6801	0	0	0	0
21ur-10637	WBGene00172470	5.19849	0.137672	NA	0.99072	0	0	0	0	0	0	0	0
21ur-10654	WBGene00171317	5.50851	0.115608	NA	0	0	3.79898	0	0	0	0	0	0
21ur-10657	WBGene00165211	4.91841	0.160286	NA	0.24768	0	0	0	0	0	0	0	0
21ur-10658	WBGene00174087	4.9204	0.160115	NA	0	0.252225	0	0	0	0	0	0	0
21ur-10670	WBGene00169660	5.50851	0.115608	NA	0	0	0	4.80455	0	0	0	0	0
21ur-10671	WBGene00166307	5.50851	0.115608	NA	0	0	0	4.80455	0	0	0	0	0
21ur-10677	WBGene00172399	5.50851	0.115608	0.185995	0	0	0	0	11.84	0	0	0	0
21ur-10696	WBGene00174730	4.9204	0.160115	NA	0	0.252225	0	0	0	0	0	0	0
21ur-10700	WBGene00168933	8.36435	0.0157907	0.0431271	0	0	0	0	0	60.691	0	0	0
21ur-1072	WBGene00045792	6.25997	0.0734806	0.135577	0	0	0	9.60909	0	0	0	0	0
21ur-10724	WBGene00173754	9.08749	0.00203355	0.00803106	0	0.252225	3.79898	86.4818	0	0	0	0	0
21ur-10726	WBGene00169162	5.19849	0.137672	NA	0.99072	0	0	0	0	0	0	0	0
21ur-10732	WBGene00169144	4.91841	0.160286	NA	0.24768	0	0	0	0	0	0	0	0
21ur-1075	WBGene00047258	5.76184	0.0675773	0.131755	0.49536	0.50445	0	0	11.84	0	0	0	0
21ur-10751	WBGene00167717	7.08133	0.0421496	0.0912729	0	0	0	19.2182	0	0	0	0	0
21ur-10756	WBGene00165365	5.41168	0.122178	NA	0.74304	1.0089	0	0	0	0	0	0	0
21ur-10765	WBGene00167640	5.11859	0.143856	NA	0.24768	0.50445	0	0	0	0	0	0	0
21ur-10766	WBGene00173388	4.91841	0.160286	NA	0.24768	0	0	0	0	0	0	0	0
21ur-10767	WBGene00171766	4.91841	0.160286	NA	0.24768	0	0	0	0	0	0	0	0
21ur-10784	WBGene00174808	4.91841	0.160286	NA	0.24768	0	0	0	0	0	0	0	0
21ur-10793	WBGene00166377	5.02302	0.15153	NA	0.49536	0	0	0	0	0	0	0	0
21ur-10796	WBGene00174620	5.40947	0.122332	NA	1.2384	0.50445	0	0	0	0	0	0	0
21ur-1080	WBGene00047965	7.37176	0.0156246	0.0429531	0.74304	0.252225	0	24.0227	0	0	0	0	0
21ur-10808	WBGene00172571	8.21004	0.00466114	0.0160234	0.24768	0.756675	0	48.0455	0	0	0	0	0
21ur-10813	WBGene00165715	4.9204	0.160115	NA	0	0.252225	0	0	0	0	0	0	0
21ur-10817	WBGene00174160	5.11547	0.144101	NA	0.74304	0	0	0	0	0	0	0	0
21ur-10823	WBGene00165265	6.28664	0.0157348	0.0431271	0.49536	0.252225	0	0	11.84	15.1728	0	0	0
21ur-10829	WBGene00168611	5.27524	0.131928	NA	0.99072	0.252225	0	0	0	0	0	0	0
21ur-10837	WBGene00170894	5.50851	0.115608	0.185995	0	0	0	0	0	15.1728	0	0	0
21ur-10845	WBGene00170071	5.11703	0.143978	NA	0.49536	0.252225	0	0	0	0	0	0	0
21ur-10861	WBGene00166735	5.62822	0.107875	NA	1.73376	1.0089	0	0	0	0	0	0	0
21ur-10862	WBGene00165406	5.41057	0.122255	NA	0.99072	0.756675	0	0	0	0	0	0	0
21ur-1087	WBGene00048288	4.91841	0.160286	NA	0.24768	0	0	0	0	0	0	0	0
21ur-10873	WBGene00169221	4.91841	0.160286	NA	0.24768	0	0	0	0	0	0	0	0
21ur-10895	WBGene00173336	5.50851	0.115608	NA	0	0	3.79898	0	0	0	0	0	0
21ur-1092	WBGene00045913	7.5841	0.0292572	0.0697711	0	0.756675	0	0	0	45.5183	0	0	0
21ur-10923	WBGene00171296	7.51105	0.0308856	0.0722138	0.24768	0	0	0	0	45.5183	0	0	0
21ur-10957	WBGene00167321	5.78009	0.0986617	0.170915	0.99072	0	0	4.80455	0	0	0	0	0
21ur-1096	WBGene00049531	5.02477	0.151387	NA	0.24768	0.252225	0	0	0	0	0	0	0
21ur-10977	WBGene00174820	7.98947	3.12518e-06	3.01064e-05	5.69664	4.28782	11.3969	9.60909	11.84	0	0	0	0
21ur-10980	WBGene00173251	4.9204	0.160115	NA	0	0.252225	0	0	0	0	0	0	0
21ur-10985	WBGene00168625	7.03852	0.0237215	0.0590848	0.24768	0	0	4.80455	23.6801	0	0	0	0
21ur-11001	WBGene00174346	6.42534	0.0660576	0.1295	0.74304	0	0	9.60909	0	0	0	0	0
21ur-11014	WBGene00165663	4.91841	0.160286	NA	0.24768	0	0	0	0	0	0	0	0
21ur-11017	WBGene00174963	5.11703	0.143978	NA	0.49536	0.252225	0	0	0	0	0	0	0
21ur-11031	WBGene00174163	5.50851	0.115608	0.185995	0	0	0	0	0	15.1728	0	0	0
21ur-11034	WBGene00171473	6.25997	0.0734806	0.135577	0	0	0	0	23.6801	0	0	0	0
21ur-1106	WBGene00049268	5.50851	0.115608	0.185995	0	0	0	0	11.84	0	0	0	0
21ur-11063	WBGene00170159	5.11859	0.143856	NA	0.24768	0.50445	0	0	0	0	0	0	0
21ur-11065	WBGene00171542	6.25997	0.0734807	0.135577	0	0	0	4.80455	0	15.1728	0	0	0
21ur-11067	WBGene00169550	8.36435	0.0157907	0.0431271	0	0	0	0	0	60.691	0	0	0
21ur-11079	WBGene00168012	6.31967	0.0707259	0.135577	0.24768	0	0	0	0	30.3455	0	0	0
21ur-11082	WBGene00168952	5.58596	0.110557	0.185159	0.24768	0	0	0	11.84	0	0	0	0
21ur-11095	WBGene00168669	5.50851	0.115608	NA	0	0	0	4.80455	0	0	0	0	0
21ur-11096	WBGene00173126	6.80173	0.042473	0.0918055	0.24768	0.252225	0	14.4136	0	0	0	0	0
21ur-111	WBGene00049489	5.3432	0.126998	NA	1.48608	0	0	0	0	0	0	0	0
21ur-11101	WBGene00173486	8.53701	1.31359e-05	0.000105939	0.74304	2.0178	0	283.468	213.121	106.209	0	0.747489	0
21ur-11104	WBGene00169688	8.19151	0.0182105	0.048198	0	0	0	4.80455	47.3602	0	0	0	0
21ur-11142	WBGene00173713	5.02477	0.151387	NA	0.24768	0.252225	0	0	0	0	0	0	0
21ur-11146	WBGene00169597	10.4447	6.09098e-07	7.20413e-06	1.98144	1.26112	0	33.6318	118.4	91.0365	0	0	0
21ur-11156	WBGene00169346	5.11547	0.144101	NA	0.74304	0	0	0	0	0	0	0	0
21ur-11190	WBGene00168975	8.03016	0.0207467	0.0532249	0	0	0	43.2409	0	0	0	0	0
21ur-11205	WBGene00171489	7.54747	0.0300642	0.0711715	0.49536	0	0	0	0	45.5183	0	0	0
21ur-1121	WBGene00050699	10.49	8.42696e-07	9.5957e-06	2.22912	1.51335	0	14.4136	71.0403	166.9	0	0	0
21ur-11214	WBGene00169646	4.91841	0.160286	NA	0.24768	0	0	0	0	0	0	0	0
21ur-11233	WBGene00165312	5.20132	0.137457	NA	0.49536	0.50445	0	0	0	0	0	0	0
21ur-11234	WBGene00174317	5.41057	0.122255	NA	0.99072	0.756675	0	0	0	0	0	0	0
21ur-11235	WBGene00166232	4.91841	0.160286	NA	0.24768	0	0	0	0	0	0	0	0
21ur-11242	WBGene00172075	9.16931	0.00791044	0.0246687	0	0	0	96.0909	0	0	0	0	0
21ur-11244	WBGene00165787	6.25997	0.0734806	0.135577	0	0	0	0	0	30.3455	0	0	0
21ur-11246	WBGene00165587	5.20273	0.13735	NA	0.24768	0.756675	0	0	0	0	0	0	0
21ur-11250	WBGene00169998	5.11859	0.143856	NA	0.24768	0.50445	0	0	0	0	0	0	0
21ur-11254	WBGene00171427	7.87347	0.00226726	0.00879925	0	0	0	48.0455	59.2002	15.1728	0	0.186872	0
21ur-11265	WBGene00170236	5.50851	0.115608	0.185995	0	0	0	0	11.84	0	0	0	0
21ur-11269	WBGene00167089	5.52464	0.114542	NA	1.73376	0.50445	0	0	0	0	0	0	0
21ur-11274	WBGene00172334	7.72037	0.0264184	0.0642839	0.24768	0	0	33.6318	0	0	0	0	0
21ur-11279	WBGene00165824	4.9204	0.160115	NA	0	0.252225	0	0	0	0	0	0	0
21ur-11280	WBGene00168658	4.91841	0.160286	NA	0.24768	0	0	0	0	0	0	0	0
21ur-11282	WBGene00169743	5.50851	0.115608	0.185995	0	0	0	0	11.84	0	0	0	0
21ur-11299	WBGene00170525	6.42136	0.0324947	0.0745507	0.24768	0.756675	0	0	23.6801	0	0	0	0
21ur-11312	WBGene00168598	6.25997	0.0734806	0.135577	0	0	0	9.60909	0	0	0	0	0
21ur-1133	WBGene00048538	4.9204	0.160115	NA	0	0.252225	0	0	0	0	0	0	0
21ur-11344	WBGene00172506	7.51174	0.0308701	0.0722138	0	0.252225	0	0	0	45.5183	0	0	0
21ur-11358	WBGene00169333	8.41351	0.000798383	0.00366886	0.49536	0.252225	0	14.4136	47.3602	0	0	0	0
21ur-11360	WBGene00170600	4.91841	0.160286	NA	0.24768	0	0	0	0	0	0	0	0
21ur-11374	WBGene00165452	5.02477	0.151387	NA	0.24768	0.252225	0	0	0	0	0	0	0
21ur-11407	WBGene00165955	2.71395	0.402633	0.516624	0	0.50445	0	0	35.5201	0	0	0	2.42509
21ur-1141	WBGene00046469	8.25604	0.00454232	0.0156855	0.49536	0	7.59796	0	47.3602	0	0	0	0
21ur-11436	WBGene00173983	5.50851	0.115608	0.185995	0	0	0	0	0	15.1728	0	0	0
21ur-11446	WBGene00168758	8.36435	0.0157907	0.0431271	0	0	0	0	0	60.691	0	0	0
21ur-1145	WBGene00048735	4.91841	0.160286	NA	0.24768	0	0	0	0	0	0	0	0
21ur-11457	WBGene00166869	5.11703	0.143978	NA	0.49536	0.252225	0	0	0	0	0	0	0
21ur-11465	WBGene00170199	6.82602	0.0095261	0.0287436	0.24768	0.252225	0	9.60909	0	15.1728	0	0	0
21ur-11466	WBGene00165893	5.58728	0.110472	NA	0	0.252225	3.79898	0	0	0	0	0	0
21ur-11474	WBGene00171940	9.04645	0.00218872	0.0085409	0	0	0	4.80455	59.2002	30.3455	0	0	0
21ur-1150	WBGene00048334	4.91841	0.160286	NA	0.24768	0	0	0	0	0	0	0	0
21ur-11522	WBGene00170924	5.02651	0.151245	NA	0	0.50445	0	0	0	0	0	0	0
21ur-11532	WBGene00172687	6.25997	0.0734806	0.135577	0	0	0	9.60909	0	0	0	0	0
21ur-11549	WBGene00166898	5.6562	0.106128	NA	0.49536	0	0	4.80455	0	0	0	0	0
21ur-11563	WBGene00173223	4.91841	0.160286	NA	0.24768	0	0	0	0	0	0	0	0
21ur-11565	WBGene00173231	8.43701	2.67581e-05	0.000196538	7.67808	6.30562	7.59796	0	0	45.5183	0	0	0
21ur-11568	WBGene00172181	5.11703	0.143978	NA	0.49536	0.252225	0	0	0	0	0	0	0
21ur-11570	WBGene00171271	5.02302	0.15153	NA	0.49536	0	0	0	0	0	0	0	0
21ur-11574	WBGene00171218	4.91841	0.160286	NA	0.24768	0	0	0	0	0	0	0	0
21ur-11576	WBGene00169512	7.54659	0.0300839	0.0711715	0.24768	0	0	28.8273	0	0	0	0	0
21ur-11583	WBGene00166304	6.10628	0.0809824	0.146071	1.73376	1.0089	3.79898	0	0	0	0	0	0
21ur-11606	WBGene00171098	5.12015	0.143733	NA	0	0.756675	0	0	0	0	0	0	0
21ur-11607	WBGene00165229	8.14679	0.00108344	0.00474151	1.48608	0.252225	0	4.80455	47.3602	0	0	0	0
21ur-11618	WBGene00169622	7.11282	0.0412184	0.0899541	0.49536	0	0	19.2182	0	0	0	0	0
21ur-11622	WBGene00172972	7.35103	0.0010969	0.00478868	0.24768	0.756675	0	9.60909	11.84	15.1728	0	0	0
21ur-11625	WBGene00169903	4.91841	0.160286	NA	0.24768	0	0	0	0	0	0	0	0
21ur-11626	WBGene00167188	7.51053	0.000542894	0.00263396	2.72448	2.77447	0	14.4136	11.84	0	0	0	0
21ur-1163	WBGene00046476	5.71949	0.102259	NA	2.22912	1.0089	0	0	0	0	0	0	0
21ur-11630	WBGene00173966	6.37694	0.0681635	0.132473	0	0.50445	0	0	0	30.3455	0	0	0
21ur-11639	WBGene00172560	8.31872	0.0163996	0.0443814	0	0.252225	0	52.85	0	0	0	0	0
21ur-1164	WBGene00046854	5.27395	0.132023	NA	1.2384	0	0	0	0	0	0	0	0
21ur-11641	WBGene00168911	5.50851	0.115608	NA	0	0	0	4.80455	0	0	0	0	0
21ur-11643	WBGene00171210	5.39698	0.00961757	0.0289787	0.24768	0	3.79898	28.8273	378.882	30.3455	5.00465	0.0934361	0
21ur-11648	WBGene00165251	5.02302	0.15153	NA	0.49536	0	0	0	0	0	0	0	0
21ur-1166	WBGene00049640	4.91841	0.160286	NA	0.24768	0	0	0	0	0	0	0	0
21ur-11661	WBGene00170091	5.50851	0.115608	NA	0	0	0	4.80455	0	0	0	0	0
21ur-11662	WBGene00166659	6.25997	0.0734806	0.135577	0	0	0	0	23.6801	0	0	0	0
21ur-11671	WBGene00168791	5.40836	0.122408	NA	1.48608	0.252225	0	0	0	0	0	0	0
21ur-11673	WBGene00167394	5.11703	0.143978	NA	0.49536	0.252225	0	0	0	0	0	0	0
21ur-11679	WBGene00172019	5.02651	0.151245	NA	0	0.50445	0	0	0	0	0	0	0
21ur-11682	WBGene00168019	4.9204	0.160115	NA	0	0.252225	0	0	0	0	0	0	0
21ur-11702	WBGene00172418	6.25997	0.0734806	0.135577	0	0	0	0	0	30.3455	0	0	0
21ur-11706	WBGene00168989	7.47281	0.0317692	0.0731605	0	0	0	0	35.5201	0	0	0	0
21ur-11713	WBGene00173104	6.76551	0.0525287	0.107633	0	0	0	14.4136	0	0	0	0	0
21ur-11723	WBGene00169464	5.02651	0.151245	NA	0	0.50445	0	0	0	0	0	0	0
21ur-11730	WBGene00167088	7.51174	0.0308701	0.0722138	0	0.252225	0	0	35.5201	0	0	0	0
21ur-11743	WBGene00173427	5.02302	0.15153	NA	0.49536	0	0	0	0	0	0	0	0
21ur-11745	WBGene00171152	4.91841	0.160286	NA	0.24768	0	0	0	0	0	0	0	0
21ur-11759	WBGene00165732	4.9204	0.160115	NA	0	0.252225	0	0	0	0	0	0	0
21ur-11762	WBGene00165134	4.91841	0.160286	NA	0.24768	0	0	0	0	0	0	0	0
21ur-11765	WBGene00173210	5.35034	0.126489	NA	0	1.51335	0	0	0	0	0	0	0
21ur-1177	WBGene00046203	5.02302	0.15153	NA	0.49536	0	0	0	0	0	0	0	0
21ur-11773	WBGene00173836	4.91841	0.160286	NA	0.24768	0	0	0	0	0	0	0	0
21ur-11778	WBGene00170303	5.11703	0.143978	NA	0.49536	0.252225	0	0	0	0	0	0	0
21ur-11782	WBGene00168503	5.02477	0.151387	NA	0.24768	0.252225	0	0	0	0	0	0	0
21ur-11786	WBGene00173015	5.67501	0.104967	NA	1.98144	1.0089	0	0	0	0	0	0	0
21ur-11797	WBGene00168225	6.92127	1.7562e-05	0.000135946	10.1549	6.0534	7.59796	201.791	757.763	197.246	0	4.3915	0.346442
21ur-11811	WBGene00165077	4.9204	0.160115	NA	0	0.252225	0	0	0	0	0	0	0
21ur-11824	WBGene00172585	7.29106	0.00353875	0.0127531	0.74304	0.50445	0	0	11.84	30.3455	0	0	0
21ur-11827	WBGene00166680	4.91841	0.160286	NA	0.24768	0	0	0	0	0	0	0	0
21ur-11828	WBGene00170863	4.91841	0.160286	NA	0.24768	0	0	0	0	0	0	0	0
21ur-11829	WBGene00165284	5.02477	0.151387	NA	0.24768	0.252225	0	0	0	0	0	0	0
21ur-11845	WBGene00171141	4.91841	0.160286	NA	0.24768	0	0	0	0	0	0	0	0
21ur-11857	WBGene00166885	4.91841	0.160286	NA	0.24768	0	0	0	0	0	0	0	0
21ur-11860	WBGene00168375	5.6562	0.106128	NA	0.49536	0	3.79898	0	0	0	0	0	0
21ur-11864	WBGene00171117	4.91841	0.160286	NA	0.24768	0	0	0	0	0	0	0	0
21ur-11873	WBGene00165928	5.50851	0.115608	0.185995	0	0	0	0	11.84	0	0	0	0
21ur-11892	WBGene00174382	5.50851	0.115608	0.185995	0	0	0	0	0	15.1728	0	0	0
21ur-11902	WBGene00170026	5.20132	0.137457	NA	0.49536	0.50445	0	0	0	0	0	0	0
21ur-11903	WBGene00165376	6.25997	0.0734806	0.135577	0	0	0	9.60909	0	0	0	0	0
21ur-1191	WBGene00048345	5.02302	0.15153	NA	0.49536	0	0	0	0	0	0	0	0
21ur-11933	WBGene00169071	0.6191	0.852801	NA	0	0	0	0	0	0	0	1.49498	0
21ur-11948	WBGene00167906	7.47281	0.0317692	0.0731605	0	0	0	0	35.5201	0	0	0	0
21ur-11955	WBGene00173208	8.08494	0.00120752	0.00520049	0.99072	0.252225	0	33.6318	11.84	0	0	0	0
21ur-11973	WBGene00175001	5.11547	0.144101	NA	0.74304	0	0	0	0	0	0	0	0
21ur-11978	WBGene00172056	4.91841	0.160286	NA	0.24768	0	0	0	0	0	0	0	0
21ur-1199	WBGene00045982	8.32617	0.00560315	0.018607	0.24768	0.252225	0	0	0	60.691	0	0	0
21ur-1200	WBGene00049858	5.50851	0.115608	0.185995	0	0	0	0	11.84	0	0	0	0
21ur-12020	WBGene00172854	6.25997	0.0734806	0.135577	0	0	0	9.60909	0	0	0	0	0
21ur-12029	WBGene00171441	6.80822	0.0510093	0.105971	0	0.50445	0	14.4136	0	0	0	0	0
21ur-12037	WBGene00165783	8.19379	4.13496e-05	0.000286687	0.99072	1.76557	0	14.4136	11.84	136.555	0	0.186872	0
21ur-12038	WBGene00170166	5.50851	0.115608	0.185995	0	0	0	0	0	15.1728	0	0	0
21ur-1204	WBGene00047114	5.02302	0.15153	NA	0.49536	0	0	0	0	0	0	0	0
21ur-12047	WBGene00171130	6.25997	0.0734806	0.135577	0	0	0	9.60909	0	0	0	0	0
21ur-12053	WBGene00172030	4.91841	0.160286	NA	0.24768	0	0	0	0	0	0	0	0
21ur-12084	WBGene00172161	4.91841	0.160286	NA	0.24768	0	0	0	0	0	0	0	0
21ur-12098	WBGene00165015	4.9204	0.160115	NA	0	0.252225	0	0	0	0	0	0	0
21ur-12107	WBGene00173682	4.91841	0.160286	NA	0.24768	0	0	0	0	0	0	0	0
21ur-12110	WBGene00173168	4.91841	0.160286	NA	0.24768	0	0	0	0	0	0	0	0
21ur-12144	WBGene00173061	5.02651	0.151245	NA	0	0.50445	0	0	0	0	0	0	0
21ur-12156	WBGene00170366	0.833661	0.802809	NA	0	0.252225	0	0	0	0	0	1.40154	0
21ur-12159	WBGene00168263	6.25997	0.0734806	0.135577	0	0	0	9.60909	0	0	0	0	0
21ur-12163	WBGene00173924	4.91841	0.160286	NA	0.24768	0	0	0	0	0	0	0	0
21ur-12195	WBGene00173930	12.4472	1.03043e-08	1.91426e-07	2.4768	3.27892	0	437.214	378.882	121.382	0	0	0
21ur-12197	WBGene00172870	5.02651	0.151245	NA	0	0.50445	0	0	0	0	0	0	0
21ur-12198	WBGene00169547	5.50851	0.115608	NA	0	0	0	4.80455	0	0	0	0	0
21ur-12206	WBGene00171593	5.11547	0.144101	NA	0.74304	0	0	0	0	0	0	0	0
21ur-1221	WBGene00048518	5.72059	0.102193	NA	0.74304	0	0	4.80455	0	0	0	0	0
21ur-12218	WBGene00174366	9.87242	4.58862e-05	0.000312588	1.48608	1.26112	0	139.332	0	15.1728	0	0	0
21ur-12220	WBGene00173640	8.66295	0.0122833	0.0354197	0.24768	0	0	67.2637	0	0	0	0	0
21ur-12225	WBGene00170788	5.52561	0.114478	NA	1.48608	0.756675	0	0	0	0	0	0	0
21ur-12229	WBGene00173557	5.02477	0.151387	NA	0.24768	0.252225	0	0	0	0	0	0	0
21ur-12233	WBGene00174316	7.79067	0.0250246	0.0615928	0	0	0	14.4136	23.6801	0	0	0	0
21ur-12235	WBGene00169089	9.01535	0.00224767	0.00873908	0	0.252225	0	72.0682	0	15.1728	0	0	0
21ur-12237	WBGene00167957	4.9204	0.160115	NA	0	0.252225	0	0	0	0	0	0	0
21ur-12247	WBGene00172287	5.27782	0.131738	NA	0.49536	0.756675	0	0	0	0	0	0	0
21ur-12252	WBGene00171622	5.02302	0.15153	NA	0.49536	0	0	0	0	0	0	0	0
21ur-12258	WBGene00165044	12.1426	5.86466e-15	3.55468e-13	36.9043	28.5014	49.3868	307.491	94.7204	257.937	0	0	0
21ur-1226	WBGene00047605	5.02302	0.15153	NA	0.49536	0	0	0	0	0	0	0	0
21ur-12264	WBGene00167269	5.41168	0.122178	NA	0.74304	1.0089	0	0	0	0	0	0	0
21ur-12272	WBGene00173053	4.91841	0.160286	NA	0.24768	0	0	0	0	0	0	0	0
21ur-12284	WBGene00174955	6.48012	0.0463442	0.0981967	1.98144	0.756675	7.59796	0	0	0	0	0	0
21ur-12294	WBGene00168028	5.12015	0.143733	NA	0	0.756675	0	0	0	0	0	0	0
21ur-12298	WBGene00169806	4.91841	0.160286	NA	0.24768	0	0	0	0	0	0	0	0
21ur-12301	WBGene00167452	6.29306	0.0548268	0.111435	0.24768	0	0	4.80455	11.84	0	0	0	0
21ur-12305	WBGene00174624	5.96735	0.00794171	0.024759	0.24768	1.51335	0	9.60909	11.84	0	0	0.0934361	0
21ur-1231	WBGene00049136	4.91841	0.160286	NA	0.24768	0	0	0	0	0	0	0	0
21ur-12324	WBGene00172707	4.9204	0.160115	NA	0	0.252225	0	0	0	0	0	0	0
21ur-12330	WBGene00166311	11.6167	9.51735e-12	3.30038e-10	9.16416	8.57565	22.7939	206.596	142.081	151.728	0	0	0
21ur-12357	WBGene00169200	8.99658	7.87017e-08	1.19426e-06	24.0249	23.4569	0	437.214	272.321	288.282	0	0.934361	0
21ur-12364	WBGene00170628	9.63874	0.00021512	0.00118995	0	0	3.79898	14.4136	106.56	15.1728	0	0	0
21ur-12369	WBGene00170715	8.03646	0.0206435	0.0531129	0	0	0	0	47.3602	0	0	0	0
21ur-12385	WBGene00174869	13.7701	5.66178e-11	1.71101e-09	18.3283	12.8635	0	518.891	911.684	895.193	0	0	0
21ur-12394	WBGene00172535	4.9204	0.160115	NA	0	0.252225	0	0	0	0	0	0	0
21ur-12405	WBGene00169552	5.50851	0.115608	NA	0	0	0	4.80455	0	0	0	0	0
21ur-12438	WBGene00169887	4.91841	0.160286	NA	0.24768	0	0	0	0	0	0	0	0
21ur-12441	WBGene00166437	5.02302	0.15153	NA	0.49536	0	0	0	0	0	0	0	0
21ur-1246	WBGene00050635	5.02651	0.151245	NA	0	0.50445	0	0	0	0	0	0	0
21ur-12460	WBGene00165402	4.91841	0.160286	NA	0.24768	0	0	0	0	0	0	0	0
21ur-12471	WBGene00170998	8.03646	0.0206435	0.0531129	0	0	0	0	47.3602	0	0	0	0
21ur-1248	WBGene00046336	5.20413	0.137243	NA	0	1.0089	0	0	0	0	0	0	0
21ur-12487	WBGene00169330	4.91841	0.160286	NA	0.24768	0	0	0	0	0	0	0	0
21ur-12491	WBGene00166852	5.70495	0.0779532	0.141598	0.49536	0.252225	0	0	11.84	0	0	0	0
21ur-12497	WBGene00174559	4.9204	0.160115	NA	0	0.252225	0	0	0	0	0	0	0
21ur-12498	WBGene00168839	5.02477	0.151387	NA	0.24768	0.252225	0	0	0	0	0	0	0
21ur-12508	WBGene00175009	7.16576	0.00133827	0.00567339	2.97216	1.51335	0	9.60909	11.84	0	0	0	0
21ur-1251	WBGene00047776	5.27524	0.131928	NA	0.99072	0.252225	0	0	0	0	0	0	0
21ur-12511	WBGene00168965	6.65049	0.0045476	0.0157012	1.2384	1.51335	0	0	11.84	15.1728	0	0	0
21ur-12521	WBGene00171019	5.50851	0.115608	NA	0	0	0	4.80455	0	0	0	0	0
21ur-12529	WBGene00165451	6.5202	0.0245593	0.060678	0.99072	0.50445	0	0	23.6801	0	0	0	0
21ur-12534	WBGene00167473	5.41057	0.122255	NA	0.99072	0.756675	0	0	0	0	0	0	0
21ur-12538	WBGene00165133	4.91841	0.160286	NA	0.24768	0	0	0	0	0	0	0	0
21ur-1254	WBGene00048122	8.44291	0.0147898	0.0411057	0	0.252225	0	57.6546	0	0	0	0	0
21ur-12544	WBGene00168824	5.02302	0.15153	NA	0.49536	0	0	0	0	0	0	0	0
21ur-12555	WBGene00170549	5.50851	0.115608	NA	0	0	0	4.80455	0	0	0	0	0
21ur-12556	WBGene00166243	5.58596	0.110557	0.185159	0.24768	0	0	0	11.84	0	0	0	0
21ur-12557	WBGene00171633	6.25997	0.0734807	0.135577	0	0	0	4.80455	11.84	0	0	0	0
21ur-1256	WBGene00048871	4.91841	0.160286	NA	0.24768	0	0	0	0	0	0	0	0
21ur-12561	WBGene00169888	5.11859	0.143856	NA	0.24768	0.50445	0	0	0	0	0	0	0
21ur-12562	WBGene00174136	5.50851	0.115608	NA	0	0	3.79898	0	0	0	0	0	0
21ur-1257	WBGene00045653	4.91841	0.160286	NA	0.24768	0	0	0	0	0	0	0	0
21ur-12571	WBGene00170910	4.9204	0.160115	NA	0	0.252225	0	0	0	0	0	0	0
21ur-12572	WBGene00167250	10.7329	1.2097e-06	1.31518e-05	0.99072	1.0089	0	14.4136	130.241	151.728	0	0	0
21ur-12578	WBGene00170782	12.2734	5.31348e-12	1.88849e-10	16.8422	17.6557	7.59796	446.823	213.121	136.555	0	0	0
21ur-1259	WBGene00047184	6.5083	0.0216237	0.0550721	0.74304	0.756675	0	0	0	30.3455	0	0	0
21ur-12612	WBGene00174977	4.9204	0.160115	NA	0	0.252225	0	0	0	0	0	0	0
21ur-12617	WBGene00169944	6.43769	0.0120087	0.0347589	1.2384	0.252225	0	4.80455	11.84	0	0	0	0
21ur-12622	WBGene00171838	5.11703	0.143978	NA	0.49536	0.252225	0	0	0	0	0	0	0
21ur-12639	WBGene00172357	7.58249	0.00958586	0.0288994	0.74304	0.50445	0	28.8273	0	0	0	0	0
21ur-12641	WBGene00171381	4.9204	0.160115	NA	0	0.252225	0	0	0	0	0	0	0
21ur-12642	WBGene00165762	5.78009	0.0986617	0.170915	0.99072	0	0	4.80455	0	0	0	0	0
21ur-12645	WBGene00165047	5.02302	0.15153	NA	0.49536	0	0	0	0	0	0	0	0
21ur-12658	WBGene00170808	5.02302	0.15153	NA	0.49536	0	0	0	0	0	0	0	0
21ur-12662	WBGene00172466	5.12015	0.143733	NA	0	0.756675	0	0	0	0	0	0	0
21ur-12666	WBGene00167863	4.91841	0.160286	NA	0.24768	0	0	0	0	0	0	0	0
21ur-12668	WBGene00174293	4.9204	0.160115	NA	0	0.252225	0	0	0	0	0	0	0
21ur-12678	WBGene00171862	4.9204	0.160115	NA	0	0.252225	0	0	0	0	0	0	0
21ur-1270	WBGene00049050	5.02302	0.15153	NA	0.49536	0	0	0	0	0	0	0	0
21ur-12701	WBGene00170257	11.6287	1.02478e-10	2.93524e-09	11.641	8.82787	3.79898	139.332	142.081	242.764	0	0	0
21ur-12718	WBGene00166850	5.50851	0.115608	0.185995	0	0	0	0	11.84	0	0	0	0
21ur-12735	WBGene00167365	3.39879	NA	NA	0	0	0	0	59.2002	0	0	2.61621	0
21ur-12737	WBGene00168079	4.9204	0.160115	NA	0	0.252225	0	0	0	0	0	0	0
21ur-12769	WBGene00169362	9.01419	0.00023888	0.00129878	0.99072	1.0089	0	4.80455	0	91.0365	0	0	0
21ur-12770	WBGene00170021	4.91841	0.160286	NA	0.24768	0	0	0	0	0	0	0	0
21ur-12780	WBGene00168322	4.9204	0.160115	NA	0	0.252225	0	0	0	0	0	0	0
21ur-12785	WBGene00165997	7.53605	0.0303197	0.0714685	0	0	0	28.8273	0	0	0	0	0
21ur-12786	WBGene00171442	5.78112	0.0986012	0.170915	0.74304	0.252225	0	4.80455	0	0	0	0	0
21ur-12794	WBGene00172092	5.41057	0.122255	NA	0.99072	0.756675	0	0	0	0	0	0	0
21ur-128	WBGene00050466	5.50851	0.115608	NA	0	0	0	4.80455	0	0	0	0	0
21ur-12807	WBGene00168864	0.451693	0.892188	NA	0	0	0	0	0	0	0	1.68185	0
21ur-12808	WBGene00166758	7.71135	0.0265985	0.0645313	0	0	0	33.6318	0	0	0	0	0
21ur-12815	WBGene00171461	5.11547	0.144101	NA	0.74304	0	0	0	0	0	0	0	0
21ur-12821	WBGene00166073	8.10586	0.000700876	0.00328653	0.49536	1.0089	0	14.4136	35.5201	0	0	0	0
21ur-1285	WBGene00049251	8.66295	0.0122833	0.0354197	0.24768	0	0	67.2637	0	0	0	0	0
21ur-12859	WBGene00167336	4.91841	0.160286	NA	0.24768	0	0	0	0	0	0	0	0
21ur-12883	WBGene00173124	10.856	3.67897e-09	7.51099e-08	3.7152	6.0534	3.79898	120.114	142.081	45.5183	0	0	0
21ur-12913	WBGene00172217	5.34439	0.126913	NA	1.2384	0.252225	0	0	0	0	0	0	0
21ur-12947	WBGene00174374	9.43973	0.000168014	0.000956581	0.49536	0.252225	0	81.6773	35.5201	0	0	0	0
21ur-12951	WBGene00174634	7.53605	0.0303197	0.0714685	0	0	0	28.8273	0	0	0	0	0
21ur-12969	WBGene00170426	7.53605	0.0303197	0.0714685	0	0	0	28.8273	0	0	0	0	0
21ur-1297	WBGene00048604	5.27395	0.132023	NA	1.2384	0	0	0	0	0	0	0	0
21ur-12975	WBGene00173203	2.11333	0.107509	0.182315	0.49536	3.0267	3.79898	33.6318	47.3602	30.3455	1.63195	1.58841	9.00749
21ur-12977	WBGene00165095	11.195	1.36308e-07	1.93398e-06	0.99072	0.50445	3.79898	19.2182	260.481	121.382	0	0	0
21ur-12979	WBGene00169141	7.9186	0.0226514	0.0571183	0	0	0	28.8273	11.84	0	0	0	0
21ur-12981	WBGene00165233	8.33895	0.000868093	0.00393678	0	1.0089	3.79898	38.4364	11.84	0	0	0	0
21ur-12983	WBGene00169251	5.6562	0.106128	0.180301	0.49536	0	0	0	0	15.1728	0	0	0
21ur-12984	WBGene00173551	8.03016	0.0207467	0.0532249	0	0	0	43.2409	0	0	0	0	0
21ur-12990	WBGene00168962	7.76505	0.00115257	0.00499401	0.74304	0.756675	0	14.4136	0	30.3455	0	0	0
21ur-12992	WBGene00172814	6.25997	0.0734806	0.135577	0	0	0	9.60909	0	0	0	0	0
21ur-1300	WBGene00049412	5.50851	0.115608	NA	0	0	0	4.80455	0	0	0	0	0
21ur-13005	WBGene00174863	4.91841	0.160286	NA	0.24768	0	0	0	0	0	0	0	0
21ur-1301	WBGene00047130	6.87024	0.0488693	0.10229	0	0	0	9.60909	11.84	0	0	0	0
21ur-13011	WBGene00174541	5.52658	0.114414	NA	1.2384	1.0089	0	0	0	0	0	0	0
21ur-13013	WBGene00170697	4.91841	0.160286	NA	0.24768	0	0	0	0	0	0	0	0
21ur-13016	WBGene00172054	4.9204	0.160115	NA	0	0.252225	0	0	0	0	0	0	0
21ur-13017	WBGene00173545	5.27524	0.131928	NA	0.99072	0.252225	0	0	0	0	0	0	0
21ur-13021	WBGene00168209	4.91841	0.160286	NA	0.24768	0	0	0	0	0	0	0	0
21ur-13033	WBGene00168555	8.82287	4.48614e-05	0.000306663	3.21984	2.77447	0	48.0455	23.6801	0	0	0	0
21ur-13040	WBGene00168805	6.25997	0.0734806	0.135577	0	0	0	9.60909	0	0	0	0	0
21ur-1305	WBGene00050073	4.9204	0.160115	NA	0	0.252225	0	0	0	0	0	0	0
21ur-13080	WBGene00172146	5.27395	0.132023	NA	1.2384	0	0	0	0	0	0	0	0
21ur-13083	WBGene00173279	1.78511	0.597521	NA	0	0	0	0	0	0	0	0.654053	0
21ur-13096	WBGene00166597	5.02302	0.15153	NA	0.49536	0	0	0	0	0	0	0	0
21ur-13106	WBGene00171873	7.54659	0.0300839	0.0711715	0.24768	0	0	28.8273	0	0	0	0	0
21ur-13116	WBGene00168890	6.78671	0.0517696	0.107052	0.24768	0	0	14.4136	0	0	0	0	0
21ur-13121	WBGene00165687	5.19991	0.137564	NA	0.74304	0.252225	0	0	0	0	0	0	0
21ur-13128	WBGene00165789	4.91841	0.160286	NA	0.24768	0	0	0	0	0	0	0	0
21ur-13132	WBGene00174555	7.71135	0.0265985	0.0645313	0	0	0	33.6318	0	0	0	0	0
21ur-13141	WBGene00168559	4.91841	0.160286	NA	0.24768	0	0	0	0	0	0	0	0
21ur-13147	WBGene00167738	5.78009	0.0986617	0.170915	0.99072	0	0	0	11.84	0	0	0	0
21ur-13185	WBGene00165602	7.18754	0.0390797	0.0861162	1.73376	0	0	19.2182	0	0	0	0	0
21ur-13186	WBGene00170277	10.1071	4.16387e-08	6.76462e-07	2.4768	2.77447	3.79898	52.85	47.3602	91.0365	0	0	0
21ur-13201	WBGene00172714	4.9204	0.160115	NA	0	0.252225	0	0	0	0	0	0	0
21ur-1321	WBGene00048553	9.48995	7.26614e-05	0.000463249	1.48608	1.26112	0	105.7	11.84	0	0	0	0
21ur-13213	WBGene00168125	5.02651	0.151245	NA	0	0.50445	0	0	0	0	0	0	0
21ur-13215	WBGene00169594	8.31155	0.0164973	0.0445396	0	0	0	52.85	0	0	0	0	0
21ur-13218	WBGene00166516	5.02477	0.151387	NA	0.24768	0.252225	0	0	0	0	0	0	0
21ur-13220	WBGene00167507	4.91841	0.160286	NA	0.24768	0	0	0	0	0	0	0	0
21ur-13230	WBGene00174676	4.91841	0.160286	NA	0.24768	0	0	0	0	0	0	0	0
21ur-13232	WBGene00170789	4.91841	0.160286	NA	0.24768	0	0	0	0	0	0	0	0
21ur-13240	WBGene00171582	10.605	5.76569e-07	6.88501e-06	1.98144	0.756675	0	110.505	94.7204	60.691	0	0	0
21ur-13245	WBGene00171586	10.0124	7.92681e-07	9.08907e-06	3.21984	1.51335	0	52.85	94.7204	30.3455	0	0	0
21ur-13251	WBGene00169940	4.91841	0.160286	NA	0.24768	0	0	0	0	0	0	0	0
21ur-13254	WBGene00171697	5.50851	0.115608	0.185995	0	0	0	0	11.84	0	0	0	0
21ur-13268	WBGene00174155	6.25997	0.0734806	0.135577	0	0	0	9.60909	0	0	0	0	0
21ur-13274	WBGene00170152	10.4043	1.00547e-07	1.48571e-06	1.98144	1.26112	3.79898	124.918	71.0403	30.3455	0	0	0
21ur-13288	WBGene00173414	0.939803	0.778787	NA	0	0	0	0	0	0	1.19676	0	0
21ur-13290	WBGene00170957	-1.14061	0.730443	NA	0	0	0	0	0	0	0	0	5.19663
21ur-13298	WBGene00167053	8.07477	0.0062418	0.0203427	0	0.50445	0	33.6318	11.84	0	0	0	0
21ur-13300	WBGene00173756	7.87992	0.023347	0.0583497	0	0	0	38.4364	0	0	0	0	0
21ur-13302	WBGene00166747	7.08133	0.0421496	0.0912729	0	0	0	19.2182	0	0	0	0	0
21ur-13310	WBGene00174741	5.67336	0.105068	NA	2.4768	0.50445	0	0	0	0	0	0	0
21ur-13312	WBGene00170928	5.11547	0.144101	NA	0.74304	0	0	0	0	0	0	0	0
21ur-13314	WBGene00166300	6.42762	0.065958	0.129398	0.74304	0	0	0	0	30.3455	0	0	0
21ur-13318	WBGene00172021	5.50851	0.115608	0.185995	0	0	0	0	11.84	0	0	0	0
21ur-13324	WBGene00165276	5.50851	0.115608	0.185995	0	0	0	0	0	15.1728	0	0	0
21ur-13330	WBGene00174472	7.50264	0.0100333	0.029957	0.74304	0	0	9.60909	0	30.3455	0	0	0
21ur-13346	WBGene00167793	4.91841	0.160286	NA	0.24768	0	0	0	0	0	0	0	0
21ur-1335	WBGene00048093	5.02477	0.151387	NA	0.24768	0.252225	0	0	0	0	0	0	0
21ur-1336	WBGene00047445	5.19849	0.137672	NA	0.99072	0	0	0	0	0	0	0	0
21ur-13362	WBGene00173026	11.5899	2.18864e-10	5.80996e-09	9.9072	15.1335	3.79898	317.1	130.241	45.5183	0	0	0
21ur-13369	WBGene00165791	5.58728	0.110472	0.185159	0	0.252225	0	0	11.84	0	0	0	0
21ur-1337	WBGene00048908	4.91841	0.160286	NA	0.24768	0	0	0	0	0	0	0	0
21ur-13378	WBGene00174084	4.9204	0.160115	NA	0	0.252225	0	0	0	0	0	0	0
21ur-13383	WBGene00172544	8.11638	7.77256e-05	0.00049129	4.45824	4.28782	0	14.4136	0	30.3455	0	0	0
21ur-1340	WBGene00046039	6.25997	0.0734807	0.135577	0	0	0	4.80455	11.84	0	0	0	0
21ur-13411	WBGene00172415	6.25997	0.0734806	0.135577	0	0	0	0	23.6801	0	0	0	0
21ur-13412	WBGene00168124	4.9204	0.160115	NA	0	0.252225	0	0	0	0	0	0	0
21ur-13424	WBGene00172412	5.34915	0.126574	NA	0.24768	1.26112	0	0	0	0	0	0	0
21ur-13428	WBGene00167949	11.7341	5.11994e-12	1.82882e-10	17.0899	21.9436	11.3969	148.941	59.2002	333.801	0	0	0
21ur-13434	WBGene00173905	5.20273	0.13735	NA	0.24768	0.756675	0	0	0	0	0	0	0
21ur-13435	WBGene00165247	4.9204	0.160115	NA	0	0.252225	0	0	0	0	0	0	0
21ur-13439	WBGene00173569	10.7953	9.67293e-09	1.81228e-07	2.97216	3.53115	3.79898	110.505	142.081	45.5183	0	0	0
21ur-13445	WBGene00173468	4.9204	0.160115	NA	0	0.252225	0	0	0	0	0	0	0
21ur-13449	WBGene00165091	4.91841	0.160286	NA	0.24768	0	0	0	0	0	0	0	0
21ur-13463	WBGene00171642	4.9204	0.160115	NA	0	0.252225	0	0	0	0	0	0	0
21ur-13465	WBGene00173737	8.60665	0.00047993	0.00237754	0.49536	0.756675	0	52.85	11.84	0	0	0	0
21ur-13468	WBGene00165075	4.9204	0.160115	NA	0	0.252225	0	0	0	0	0	0	0
21ur-1350	WBGene00049349	5.50851	0.115608	NA	0	0	3.79898	0	0	0	0	0	0
21ur-13505	WBGene00171045	5.11859	0.143856	NA	0.24768	0.50445	0	0	0	0	0	0	0
21ur-13509	WBGene00168693	7.20331	0.0134135	0.0379924	0.99072	1.26112	0	19.2182	0	0	0	0	0
21ur-1351	WBGene00045903	4.91841	0.160286	NA	0.24768	0	0	0	0	0	0	0	0
21ur-13539	WBGene00166277	4.91841	0.160286	NA	0.24768	0	0	0	0	0	0	0	0
21ur-13576	WBGene00165649	5.20273	0.13735	NA	0.24768	0.756675	0	0	0	0	0	0	0
21ur-13578	WBGene00166490	10.4288	6.15116e-07	7.26727e-06	2.72448	2.0178	0	163.355	35.5201	30.3455	0	0	0
21ur-13586	WBGene00171331	9.22851	0.00578876	0.0191048	0	0	0	28.8273	0	75.8638	0	0	0
21ur-13596	WBGene00173041	5.02477	0.151387	NA	0.24768	0.252225	0	0	0	0	0	0	0
21ur-1360	WBGene00047089	5.27654	0.131833	NA	0.74304	0.50445	0	0	0	0	0	0	0
21ur-13600	WBGene00169054	5.62908	0.107821	NA	1.48608	1.26112	0	0	0	0	0	0	0
21ur-13608	WBGene00174837	9.63703	7.44573e-05	0.000473147	0.74304	0.50445	0	62.4591	0	75.8638	0	0	0
21ur-13632	WBGene00170278	5.02302	0.15153	NA	0.49536	0	0	0	0	0	0	0	0
21ur-13640	WBGene00174278	4.9204	0.160115	NA	0	0.252225	0	0	0	0	0	0	0
21ur-13642	WBGene00170323	4.91841	0.160286	NA	0.24768	0	0	0	0	0	0	0	0
21ur-13661	WBGene00165841	8.64729	0.0124482	0.0357504	0	0	0	52.85	0	15.1728	0	0	0
21ur-13664	WBGene00168067	7.09749	0.0416697	0.0907725	0	0.252225	0	19.2182	0	0	0	0	0
21ur-13699	WBGene00170202	6.25997	0.0734806	0.135577	0	0	0	0	23.6801	0	0	0	0
21ur-13709	WBGene00172156	6.25997	0.0734806	0.135577	0	0	0	0	23.6801	0	0	0	0
21ur-13718	WBGene00171522	4.91841	0.160286	NA	0.24768	0	0	0	0	0	0	0	0
21ur-13741	WBGene00166174	4.91841	0.160286	NA	0.24768	0	0	0	0	0	0	0	0
21ur-13750	WBGene00166810	5.6562	0.106128	NA	0.49536	0	0	4.80455	0	0	0	0	0
21ur-13757	WBGene00173588	5.58728	0.110472	NA	0	0.252225	3.79898	0	0	0	0	0	0
21ur-13771	WBGene00170874	8.80536	0.000557886	0.00269996	2.97216	3.53115	0	67.2637	0	0	0	0	0
21ur-13780	WBGene00171504	7.49614	0.00849997	0.0261602	0.74304	0.756675	0	0	0	45.5183	0	0	0
21ur-13781	WBGene00167181	5.50851	0.115608	NA	0	0	0	4.80455	0	0	0	0	0
21ur-13789	WBGene00171223	4.91841	0.160286	NA	0.24768	0	0	0	0	0	0	0	0
21ur-13798	WBGene00168949	4.91841	0.160286	NA	0.24768	0	0	0	0	0	0	0	0
21ur-13806	WBGene00172359	4.91841	0.160286	NA	0.24768	0	0	0	0	0	0	0	0
21ur-13812	WBGene00167468	4.9204	0.160115	NA	0	0.252225	0	0	0	0	0	0	0
21ur-1382	WBGene00049123	5.27524	0.131928	NA	0.99072	0.252225	0	0	0	0	0	0	0
21ur-13828	WBGene00166760	4.91841	0.160286	NA	0.24768	0	0	0	0	0	0	0	0
21ur-13830	WBGene00170890	5.41057	0.122255	NA	0.99072	0.756675	0	0	0	0	0	0	0
21ur-13837	WBGene00170587	5.19991	0.137564	NA	0.74304	0.252225	0	0	0	0	0	0	0
21ur-13849	WBGene00168006	5.50851	0.115608	0.185995	0	0	0	0	11.84	0	0	0	0
21ur-13854	WBGene00168970	6.32833	0.0418433	0.0910484	0.24768	0.252225	0	0	23.6801	0	0	0	0
21ur-13867	WBGene00170113	5.11859	0.143856	NA	0.24768	0.50445	0	0	0	0	0	0	0
21ur-13873	WBGene00173590	5.58596	0.110557	NA	0.24768	0	0	4.80455	0	0	0	0	0
21ur-13878	WBGene00173190	7.11858	0.0243767	0.0603511	0.24768	0.50445	0	19.2182	0	0	0	0	0
21ur-13881	WBGene00168735	6.25997	0.0734807	0.135577	0	0	0	4.80455	11.84	0	0	0	0
21ur-13883	WBGene00171284	6.25997	0.0734806	0.135577	0	0	0	9.60909	0	0	0	0	0
21ur-13893	WBGene00174306	5.6562	0.106128	NA	0.49536	0	0	4.80455	0	0	0	0	0
21ur-13909	WBGene00169540	1.0345	0.75707	NA	0.24768	0	0	0	0	0	0	1.21467	0
21ur-1391	WBGene00048229	8.47945	0.00382543	0.0136211	0.24768	0	0	19.2182	0	45.5183	0	0	0
21ur-13910	WBGene00172039	5.27654	0.131833	NA	0.74304	0.50445	0	0	0	0	0	0	0
21ur-1392	WBGene00049023	5.78216	0.0985408	NA	0.49536	0.50445	3.79898	0	0	0	0	0	0
21ur-13921	WBGene00173827	5.19991	0.137564	NA	0.74304	0.252225	0	0	0	0	0	0	0
21ur-13946	WBGene00174190	4.9204	0.160115	NA	0	0.252225	0	0	0	0	0	0	0
21ur-13970	WBGene00165337	4.91841	0.160286	NA	0.24768	0	0	0	0	0	0	0	0
21ur-13973	WBGene00171072	8.16667	0.00514129	0.0173501	0.74304	0	0	0	23.6801	30.3455	0	0	0
21ur-13974	WBGene00174417	4.91841	0.160286	NA	0.24768	0	0	0	0	0	0	0	0
21ur-13975	WBGene00169039	7.3906	0.0163083	0.0442079	0.24768	0	0	0	23.6801	15.1728	0	0	0
21ur-13976	WBGene00173172	5.8785	0.0930357	NA	3.21984	1.0089	0	0	0	0	0	0	0
21ur-13982	WBGene00169352	4.91841	0.160286	NA	0.24768	0	0	0	0	0	0	0	0
21ur-13989	WBGene00171742	6.25997	0.0734806	0.135577	0	0	0	0	23.6801	0	0	0	0
21ur-13994	WBGene00170216	5.11547	0.144101	NA	0.74304	0	0	0	0	0	0	0	0
21ur-13999	WBGene00171159	10.8207	5.74749e-07	6.87386e-06	0.99072	3.0267	0	158.55	130.241	15.1728	0	0	0
21ur-14017	WBGene00171855	4.91841	0.160286	NA	0.24768	0	0	0	0	0	0	0	0
21ur-14024	WBGene00169225	7.37223	0.0156161	0.0429409	0.24768	0.756675	0	24.0227	0	0	0	0	0
21ur-14036	WBGene00169595	7.26713	0.014511	0.0405059	0.74304	0	0	14.4136	0	15.1728	0	0	0
21ur-14038	WBGene00171216	5.50851	0.115608	0.185995	0	0	0	0	11.84	0	0	0	0
21ur-14042	WBGene00165102	5.20132	0.137457	NA	0.49536	0.50445	0	0	0	0	0	0	0
21ur-14046	WBGene00167273	4.91841	0.160286	NA	0.24768	0	0	0	0	0	0	0	0
21ur-14053	WBGene00167875	10.4808	2.65969e-07	3.50195e-06	0.49536	0.756675	0	1311.64	674.883	910.365	0.870374	0.0934361	0
21ur-14059	WBGene00174909	5.27911	0.131643	NA	0.24768	1.0089	0	0	0	0	0	0	0
21ur-1406	WBGene00048457	5.11859	0.143856	NA	0.24768	0.50445	0	0	0	0	0	0	0
21ur-14084	WBGene00170117	11.8187	1.39184e-16	1.07757e-14	158.267	144.525	49.3868	2017.91	1882.57	1168.3	0	0.654053	0
21ur-14090	WBGene00172974	4.91841	0.160286	NA	0.24768	0	0	0	0	0	0	0	0
21ur-14095	WBGene00165357	6.25997	0.0734806	0.135577	0	0	0	0	23.6801	0	0	0	0
21ur-141	WBGene00050516	8.2623	0.000525992	0.00256592	0.99072	0.50445	0	19.2182	35.5201	0	0	0	0
21ur-1410	WBGene00048145	4.91841	0.160286	NA	0.24768	0	0	0	0	0	0	0	0
21ur-14102	WBGene00170111	4.91841	0.160286	NA	0.24768	0	0	0	0	0	0	0	0
21ur-14106	WBGene00173384	4.9204	0.160115	NA	0	0.252225	0	0	0	0	0	0	0
21ur-14110	WBGene00169745	5.47205	0.118049	NA	0.74304	1.26112	0	0	0	0	0	0	0
21ur-14115	WBGene00171917	7.11379	0.00705045	0.0224816	3.21984	2.27002	0	0	23.6801	0	0	0	0
21ur-14134	WBGene00168411	5.20132	0.137457	NA	0.49536	0.50445	0	0	0	0	0	0	0
21ur-14161	WBGene00166160	4.9204	0.160115	NA	0	0.252225	0	0	0	0	0	0	0
21ur-14207	WBGene00167926	5.50851	0.115608	0.185995	0	0	0	0	0	15.1728	0	0	0
21ur-14216	WBGene00173639	5.58068	0.110896	NA	0.99072	1.51335	0	0	0	0	0	0	0
21ur-14221	WBGene00174124	9.70567	9.90594e-09	1.85107e-07	3.21984	4.54005	11.3969	52.85	35.5201	45.5183	0	0	0
21ur-14231	WBGene00167587	4.91841	0.160286	NA	0.24768	0	0	0	0	0	0	0	0
21ur-14242	WBGene00170927	9.71675	0.000100449	0.00061441	0.49536	0	0	14.4136	59.2002	75.8638	0	0	0
21ur-14256	WBGene00173107	5.53045	0.114159	NA	0.24768	2.0178	0	0	0	0	0	0	0
21ur-14258	WBGene00167487	7.47281	0.0317692	0.0731605	0	0	0	0	0	45.5183	0	0	0
21ur-14269	WBGene00169029	5.20413	0.137243	NA	0	1.0089	0	0	0	0	0	0	0
21ur-14313	WBGene00168710	1.79701	0.59515	NA	0	0	0	0	0	0	0.652781	0	0
21ur-14324	WBGene00168616	7.47281	0.0317692	0.0731605	0	0	0	0	35.5201	0	0	0	0
21ur-14330	WBGene00170809	0.349279	0.841291	0.88597	0.24768	0.252225	0	0	23.6801	45.5183	10.3357	7.56833	3.11798
21ur-14348	WBGene00168397	7.06702	0.0256873	0.0629173	0.74304	0	3.79898	14.4136	0	0	0	0	0
21ur-14349	WBGene00172230	5.78216	0.0985408	NA	0.49536	0.50445	3.79898	0	0	0	0	0	0
21ur-14351	WBGene00174488	7.47281	0.0317692	0.0731605	0	0	0	0	35.5201	0	0	0	0
21ur-14353	WBGene00169631	5.58728	0.110472	NA	0	0.252225	0	4.80455	0	0	0	0	0
21ur-14361	WBGene00174377	5.50851	0.115608	NA	0	0	0	4.80455	0	0	0	0	0
21ur-14362	WBGene00169831	6.37501	0.0682488	0.132473	0.49536	0	0	0	23.6801	0	0	0	0
21ur-14363	WBGene00165346	9.28452	6.15246e-05	0.000401213	1.2384	1.26112	0	48.0455	0	60.691	0	0	0
21ur-14367	WBGene00174000	5.98524	0.087228	0.155217	0.99072	1.0089	0	4.80455	0	0	0	0	0
21ur-14368	WBGene00165432	5.50851	0.115608	NA	0	0	0	4.80455	0	0	0	0	0
21ur-14370	WBGene00165171	5.20132	0.137457	NA	0.49536	0.50445	0	0	0	0	0	0	0
21ur-14375	WBGene00169432	4.9204	0.160115	NA	0	0.252225	0	0	0	0	0	0	0
21ur-14377	WBGene00167783	5.02477	0.151387	NA	0.24768	0.252225	0	0	0	0	0	0	0
21ur-14378	WBGene00170380	4.91841	0.160286	NA	0.24768	0	0	0	0	0	0	0	0
21ur-14380	WBGene00171144	5.50851	0.115608	NA	0	0	0	4.80455	0	0	0	0	0
21ur-14381	WBGene00166562	4.91841	0.160286	NA	0.24768	0	0	0	0	0	0	0	0
21ur-14385	WBGene00168821	11.2258	6.22949e-06	5.50997e-05	0.99072	0	0	206.596	47.3602	151.728	0	0	0
21ur-14426	WBGene00166253	9.63297	2.89053e-07	3.75962e-06	3.46752	1.26112	3.79898	76.8728	23.6801	30.3455	0	0	0
21ur-14437	WBGene00172430	6.63554	0.00261615	0.00988086	0.74304	0.50445	3.79898	62.4591	0	0	0	0.280308	0
21ur-14449	WBGene00174522	9.76463	8.40481e-05	0.000526587	0.49536	0	0	38.4364	82.8803	30.3455	0	0	0
21ur-14453	WBGene00174133	5.34559	0.126828	NA	0.99072	0.50445	0	0	0	0	0	0	0
21ur-14455	WBGene00173985	5.02477	0.151387	NA	0.24768	0.252225	0	0	0	0	0	0	0
21ur-14484	WBGene00166768	5.02651	0.151245	NA	0	0.50445	0	0	0	0	0	0	0
21ur-14519	WBGene00174322	7.33036	0.0352562	0.0793878	0	0	0	24.0227	0	0	0	0	0
21ur-14532	WBGene00168228	5.50851	0.115608	NA	0	0	0	4.80455	0	0	0	0	0
21ur-14542	WBGene00169557	4.91841	0.160286	NA	0.24768	0	0	0	0	0	0	0	0
21ur-14550	WBGene00174465	4.9204	0.160115	NA	0	0.252225	0	0	0	0	0	0	0
21ur-14557	WBGene00170674	5.20273	0.13735	NA	0.24768	0.756675	0	0	0	0	0	0	0
21ur-14560	WBGene00169075	5.11859	0.143856	NA	0.24768	0.50445	0	0	0	0	0	0	0
21ur-14582	WBGene00174140	8.31155	0.0164973	0.0445396	0	0	0	52.85	0	0	0	0	0
21ur-14585	WBGene00165924	7.87992	0.023347	0.0583497	0	0	0	38.4364	0	0	0	0	0
21ur-14586	WBGene00171315	5.02302	0.15153	NA	0.49536	0	0	0	0	0	0	0	0
21ur-14599	WBGene00174092	7.33036	0.0352562	0.0793878	0	0	0	24.0227	0	0	0	0	0
21ur-14623	WBGene00171573	8.43635	0.014871	0.0412364	0	0	0	57.6546	0	0	0	0	0
21ur-14625	WBGene00169615	8.35858	0.00291501	0.0108374	0.99072	0.50445	0	52.85	0	0	0	0	0
21ur-14629	WBGene00168565	5.11703	0.143978	NA	0.49536	0.252225	0	0	0	0	0	0	0
21ur-14633	WBGene00167612	5.46895	0.118258	NA	1.48608	0.50445	0	0	0	0	0	0	0
21ur-14645	WBGene00174475	4.9204	0.160115	NA	0	0.252225	0	0	0	0	0	0	0
21ur-14649	WBGene00172481	11.5919	1.61652e-12	6.41688e-11	30.96	23.4569	7.59796	235.423	153.921	75.8638	0	0	0
21ur-1465	WBGene00046529	7.87992	0.023347	0.0583497	0	0	0	38.4364	0	0	0	0	0
21ur-14652	WBGene00169589	5.50851	0.115608	0.185995	0	0	0	0	11.84	0	0	0	0
21ur-14670	WBGene00170570	5.6562	0.106128	0.180301	0.49536	0	0	0	11.84	0	0	0	0
21ur-14673	WBGene00169583	7.38776	0.0160052	0.0435462	0	0.252225	0	0	11.84	30.3455	0	0	0
21ur-14696	WBGene00167337	5.11859	0.143856	NA	0.24768	0.50445	0	0	0	0	0	0	0
21ur-14715	WBGene00172598	6.36393	0.0328203	0.0751042	0.49536	0.252225	0	0	0	30.3455	0	0	0
21ur-14719	WBGene00171703	5.47102	0.118118	NA	0.99072	1.0089	0	0	0	0	0	0	0
21ur-14723	WBGene00169269	5.58596	0.110557	NA	0.24768	0	3.79898	0	0	0	0	0	0
21ur-14726	WBGene00168580	5.20273	0.13735	NA	0.24768	0.756675	0	0	0	0	0	0	0
21ur-14729	WBGene00166963	5.58596	0.110557	NA	0.24768	0	0	4.80455	0	0	0	0	0
21ur-14731	WBGene00165013	10.0198	1.58636e-08	2.82613e-07	6.192	4.54005	0	273.859	82.8803	197.246	0.108797	0.0934361	0
21ur-14735	WBGene00167821	4.9204	0.160115	NA	0	0.252225	0	0	0	0	0	0	0
21ur-14740	WBGene00172939	6.76551	0.0525287	0.107633	0	0	0	14.4136	0	0	0	0	0
21ur-14742	WBGene00165439	5.50849	0.114274	0.185995	0.74304	0	0	9.60909	0	0	0	0.0934361	0
21ur-14744	WBGene00166290	8.32906	0.00434691	0.0151156	0.74304	0.252225	0	0	0	60.691	0	0	0
21ur-14745	WBGene00173248	5.50851	0.115608	NA	0	0	3.79898	0	0	0	0	0	0
21ur-14750	WBGene00172268	9.19051	7.57686e-06	6.54743e-05	1.48608	3.78337	3.79898	76.8728	11.84	0	0	0	0
21ur-14753	WBGene00174468	9.89409	6.06114e-05	0.000396588	0	0.50445	0	43.2409	47.3602	75.8638	0	0	0
21ur-14760	WBGene00172655	5.25244	0.0127038	0.0363578	0.24768	0.50445	0	57.6546	11.84	30.3455	0	0	1.38577
21ur-14762	WBGene00167279	6.76551	0.0525287	0.107633	0	0	0	14.4136	0	0	0	0	0
21ur-14764	WBGene00166183	5.52852	0.114286	NA	0.74304	1.51335	0	0	0	0	0	0	0
21ur-14766	WBGene00169516	5.34439	0.126913	NA	1.2384	0.252225	0	0	0	0	0	0	0
21ur-14770	WBGene00169377	3.6903	0.289187	NA	0	0	0	0	0	0	0	0	0.346442
21ur-14776	WBGene00174895	5.47308	0.117979	NA	0.49536	1.51335	0	0	0	0	0	0	0
21ur-14777	WBGene00168093	2.48295	0.467194	NA	0	0	0	0	0	0	0	0.373745	0
21ur-14787	WBGene00166171	5.52464	0.114542	NA	1.73376	0.50445	0	0	0	0	0	0	0
21ur-14788	WBGene00170796	8.57273	0.00321475	0.0117738	0.49536	0.252225	0	62.4591	0	0	0	0	0
21ur-14789	WBGene00169657	4.9204	0.160115	NA	0	0.252225	0	0	0	0	0	0	0
21ur-14791	WBGene00171163	7.25399	0.0049788	0.0169116	0.49536	0.252225	7.59796	14.4136	0	0	0	0	0
21ur-14792	WBGene00166539	6.76551	0.0525287	0.107633	0	0	0	14.4136	0	0	0	0	0
21ur-14793	WBGene00165601	10.9995	5.0019e-13	2.1708e-11	29.7216	13.1157	22.7939	115.309	59.2002	121.382	0	0	0
21ur-14807	WBGene00170252	7.73972	0.0260293	0.063554	0.74304	0	0	33.6318	0	0	0	0	0
21ur-14813	WBGene00174438	10.6789	1.17619e-07	1.70384e-06	3.7152	3.27892	0	67.2637	165.761	45.5183	0	0	0
21ur-14817	WBGene00170345	5.50851	0.115608	0.185995	0	0	0	0	11.84	0	0	0	0
21ur-14823	WBGene00173055	1.66223	0.251535	0.355565	1.98144	1.51335	0	100.895	23.6801	15.1728	3.69909	3.27027	15.2434
21ur-14828	WBGene00165937	10.2923	4.58889e-05	0.000312588	0.49536	0.252225	0	72.0682	142.081	0	0	0	0
21ur-14829	WBGene00171297	8.1905	7.673e-07	8.84545e-06	6.93504	7.0623	11.3969	9.60909	0	15.1728	0	0	0
21ur-14830	WBGene00174331	6.20081	0.0762976	0.139431	0	0	3.79898	4.80455	0	0	0	0	0
21ur-14832	WBGene00165080	5.11547	0.144101	NA	0.74304	0	0	0	0	0	0	0	0
21ur-14838	WBGene00169740	4.9204	0.160115	NA	0	0.252225	0	0	0	0	0	0	0
21ur-1484	WBGene00046953	4.91841	0.160286	NA	0.24768	0	0	0	0	0	0	0	0
21ur-14845	WBGene00174005	11.3841	2.41687e-10	6.37625e-09	12.1363	5.0445	7.59796	177.768	47.3602	212.419	0	0	0
21ur-14850	WBGene00169900	4.91841	0.160286	NA	0.24768	0	0	0	0	0	0	0	0
21ur-14856	WBGene00165382	7.54659	0.0300839	0.0711715	0.24768	0	0	28.8273	0	0	0	0	0
21ur-14858	WBGene00172543	5.02477	0.151387	NA	0.24768	0.252225	0	0	0	0	0	0	0
21ur-14859	WBGene00167120	5.02477	0.151387	NA	0.24768	0.252225	0	0	0	0	0	0	0
21ur-1489	WBGene00046544	5.02302	0.15153	NA	0.49536	0	0	0	0	0	0	0	0
21ur-14909	WBGene00168344	9.63097	0.000188486	0.00105683	0.24768	0.50445	0	120.114	11.84	0	0	0	0
21ur-1492	WBGene00050664	4.9204	0.160115	NA	0	0.252225	0	0	0	0	0	0	0
21ur-14920	WBGene00173238	4.91841	0.160286	NA	0.24768	0	0	0	0	0	0	0	0
21ur-14922	WBGene00172390	1.02681	0.759112	NA	0	0	0	0	0	0	0	1.12123	0
21ur-14924	WBGene00170954	4.9204	0.160115	NA	0	0.252225	0	0	0	0	0	0	0
21ur-14926	WBGene00170354	4.91841	0.160286	NA	0.24768	0	0	0	0	0	0	0	0
21ur-14928	WBGene00169118	8.05322	0.0203711	0.0527483	0.74304	0	0	43.2409	0	0	0	0	0
21ur-14944	WBGene00167292	6.28772	0.0157188	0.0431014	0.24768	0.50445	0	0	11.84	15.1728	0	0	0
21ur-14949	WBGene00166664	6.25997	0.0734806	0.135577	0	0	0	9.60909	0	0	0	0	0
21ur-14955	WBGene00169307	4.91841	0.160286	NA	0.24768	0	0	0	0	0	0	0	0
21ur-14956	WBGene00173534	8.05591	0.0062841	0.0204369	0.49536	0.252225	0	43.2409	0	0	0	0	0
21ur-14969	WBGene00174753	5.02651	0.151245	NA	0	0.50445	0	0	0	0	0	0	0
21ur-14987	WBGene00171162	4.9204	0.160115	NA	0	0.252225	0	0	0	0	0	0	0
21ur-14989	WBGene00174478	4.9204	0.160115	NA	0	0.252225	0	0	0	0	0	0	0
21ur-14991	WBGene00169344	5.19849	0.137672	NA	0.99072	0	0	0	0	0	0	0	0
21ur-14999	WBGene00174925	5.88908	0.0924461	NA	0.99072	0.50445	3.79898	0	0	0	0	0	0
21ur-15006	WBGene00174454	12.7554	4.63232e-13	2.02272e-11	25.511	26.2314	7.59796	374.755	272.321	470.355	0	0	0
21ur-15024	WBGene00172341	7.33036	0.0352562	0.0793878	0	0	0	24.0227	0	0	0	0	0
21ur-15028	WBGene00168941	4.9204	0.160115	NA	0	0.252225	0	0	0	0	0	0	0
21ur-15033	WBGene00169674	4.91841	0.160286	NA	0.24768	0	0	0	0	0	0	0	0
21ur-15042	WBGene00169930	4.91841	0.160286	NA	0.24768	0	0	0	0	0	0	0	0
21ur-15046	WBGene00170390	5.40836	0.122408	NA	1.48608	0.252225	0	0	0	0	0	0	0
21ur-15049	WBGene00168741	7.19396	0.00203993	0.00804988	1.73376	1.51335	3.79898	14.4136	0	0	0	0	0
21ur-15051	WBGene00167334	5.11703	0.143978	NA	0.49536	0.252225	0	0	0	0	0	0	0
21ur-15052	WBGene00168326	4.9204	0.160115	NA	0	0.252225	0	0	0	0	0	0	0
21ur-15055	WBGene00173790	5.50851	0.115608	0.185995	0	0	0	0	11.84	0	0	0	0
21ur-15062	WBGene00173980	5.12015	0.143733	NA	0	0.756675	0	0	0	0	0	0	0
21ur-15068	WBGene00165881	4.91841	0.160286	NA	0.24768	0	0	0	0	0	0	0	0
21ur-15070	WBGene00166158	4.91841	0.160286	NA	0.24768	0	0	0	0	0	0	0	0
21ur-15077	WBGene00166240	4.91841	0.160286	NA	0.24768	0	0	0	0	0	0	0	0
21ur-15078	WBGene00171621	4.91841	0.160286	NA	0.24768	0	0	0	0	0	0	0	0
21ur-15080	WBGene00172368	5.52658	0.114414	NA	1.2384	1.0089	0	0	0	0	0	0	0
21ur-15081	WBGene00168382	5.50851	0.115608	NA	0	0	0	4.80455	0	0	0	0	0
21ur-15085	WBGene00172191	14.578	1.35404e-13	6.55454e-12	19.319	15.6379	15.1959	2171.66	769.603	1122.78	0	0	0
21ur-15088	WBGene00166696	5.58728	0.110472	0.185159	0	0.252225	0	0	0	15.1728	0	0	0
21ur-15089	WBGene00172590	5.50851	0.115608	0.185995	0	0	0	0	0	15.1728	0	0	0
21ur-15093	WBGene00174026	4.91841	0.160286	NA	0.24768	0	0	0	0	0	0	0	0
21ur-15097	WBGene00171638	5.40947	0.122332	NA	1.2384	0.50445	0	0	0	0	0	0	0
21ur-15098	WBGene00167427	5.34559	0.126828	NA	0.99072	0.50445	0	0	0	0	0	0	0
21ur-15099	WBGene00168488	4.9204	0.160115	NA	0	0.252225	0	0	0	0	0	0	0
21ur-15102	WBGene00165483	5.34678	0.126743	NA	0.74304	0.756675	0	0	0	0	0	0	0
21ur-15106	WBGene00173440	5.65741	0.106053	NA	0.24768	0.252225	0	4.80455	0	0	0	0	0
21ur-15110	WBGene00167454	5.20132	0.137457	NA	0.49536	0.50445	0	0	0	0	0	0	0
21ur-15122	WBGene00170237	7.74839	0.00884908	0.0270293	0.24768	0.756675	0	33.6318	0	0	0	0	0
21ur-15149	WBGene00165428	4.91841	0.160286	NA	0.24768	0	0	0	0	0	0	0	0
21ur-1516	WBGene00049416	4.91841	0.160286	NA	0.24768	0	0	0	0	0	0	0	0
21ur-15162	WBGene00167255	6.25997	0.0734806	0.135577	0	0	0	0	23.6801	0	0	0	0
21ur-15181	WBGene00167732	8.71902	0.0117094	0.0340494	0.24768	0	0	0	0	75.8638	0	0	0
21ur-15194	WBGene00167129	6.9994	0.0366774	0.0818811	0	0	0	0	130.241	0	0	0.467181	0
21ur-15195	WBGene00168577	5.6562	0.106128	0.180301	0.49536	0	0	0	0	15.1728	0	0	0
21ur-15208	WBGene00174170	5.11703	0.143978	NA	0.49536	0.252225	0	0	0	0	0	0	0
21ur-15209	WBGene00165861	11.2516	2.05813e-07	2.79415e-06	1.2384	1.76557	0	254.641	94.7204	60.691	0	0	0
21ur-15218	WBGene00171289	6.25997	0.0734806	0.135577	0	0	0	0	0	30.3455	0	0	0
21ur-15224	WBGene00171283	4.9204	0.160115	NA	0	0.252225	0	0	0	0	0	0	0
21ur-15231	WBGene00174723	8.64729	0.0124482	0.0357504	0	0	0	52.85	0	15.1728	0	0	0
21ur-15238	WBGene00170926	4.9204	0.160115	NA	0	0.252225	0	0	0	0	0	0	0
21ur-1524	WBGene00045968	5.11547	0.144101	NA	0.74304	0	0	0	0	0	0	0	0
21ur-15243	WBGene00171786	5.27524	0.131928	NA	0.99072	0.252225	0	0	0	0	0	0	0
21ur-15247	WBGene00166686	5.02302	0.15153	NA	0.49536	0	0	0	0	0	0	0	0
21ur-15251	WBGene00166894	5.02302	0.15153	NA	0.49536	0	0	0	0	0	0	0	0
21ur-15252	WBGene00173147	5.40947	0.122332	NA	1.2384	0.50445	0	0	0	0	0	0	0
21ur-15256	WBGene00168135	4.91841	0.160286	NA	0.24768	0	0	0	0	0	0	0	0
21ur-15269	WBGene00169519	4.91841	0.160286	NA	0.24768	0	0	0	0	0	0	0	0
21ur-15271	WBGene00173256	4.91841	0.160286	NA	0.24768	0	0	0	0	0	0	0	0
21ur-15281	WBGene00171521	5.02651	0.151245	NA	0	0.50445	0	0	0	0	0	0	0
21ur-15283	WBGene00170487	4.91841	0.160286	NA	0.24768	0	0	0	0	0	0	0	0
21ur-15284	WBGene00170977	5.02477	0.151387	NA	0.24768	0.252225	0	0	0	0	0	0	0
21ur-15291	WBGene00168408	4.9204	0.160115	NA	0	0.252225	0	0	0	0	0	0	0
21ur-15298	WBGene00166773	11.5931	1.46202e-09	3.26528e-08	2.4768	2.27002	11.3969	264.25	94.7204	151.728	0	0	0
21ur-153	WBGene00046997	4.91841	0.160286	NA	0.24768	0	0	0	0	0	0	0	0
21ur-15302	WBGene00174971	5.84399	0.0949785	NA	1.98144	2.0178	0	0	0	0	0	0	0
21ur-15312	WBGene00168256	10.5421	NA	NA	8.42112	6.30562	7.59796	225.814	0	0	0	0	0
21ur-15317	WBGene00171663	4.9204	0.160115	NA	0	0.252225	0	0	0	0	0	0	0
21ur-15327	WBGene00172802	5.50851	0.115608	0.185995	0	0	0	0	0	15.1728	0	0	0
21ur-15328	WBGene00166221	4.91841	0.160286	NA	0.24768	0	0	0	0	0	0	0	0
21ur-15336	WBGene00172257	5.02477	0.151387	NA	0.24768	0.252225	0	0	0	0	0	0	0
21ur-15339	WBGene00174154	4.91841	0.160286	NA	0.24768	0	0	0	0	0	0	0	0
21ur-15342	WBGene00167523	7.77116	0.000872924	0.00395617	1.2384	1.26112	3.79898	28.8273	0	0	0	0	0
21ur-15343	WBGene00174448	4.9204	0.160115	NA	0	0.252225	0	0	0	0	0	0	0
21ur-15364	WBGene00165714	5.50851	0.115608	0.185995	0	0	0	0	11.84	0	0	0	0
21ur-15365	WBGene00170192	5.58728	0.110472	NA	0	0.252225	0	4.80455	0	0	0	0	0
21ur-15377	WBGene00169999	5.50851	0.115608	0.185995	0	0	0	0	0	15.1728	0	0	0
21ur-15388	WBGene00174147	5.41498	0.121949	NA	0	1.76557	0	0	0	0	0	0	0
21ur-15396	WBGene00169633	16.0123	8.56108e-18	7.76156e-16	100.806	77.4331	68.3817	4641.19	3338.89	2882.82	0	0	0
21ur-15399	WBGene00173674	4.9204	0.160115	NA	0	0.252225	0	0	0	0	0	0	0
21ur-1540	WBGene00049048	4.91841	0.160286	NA	0.24768	0	0	0	0	0	0	0	0
21ur-15404	WBGene00166454	5.50851	0.115608	NA	0	0	0	4.80455	0	0	0	0	0
21ur-15412	WBGene00172068	7.33036	0.0352562	0.0793878	0	0	0	24.0227	0	0	0	0	0
21ur-15435	WBGene00173866	5.11547	0.144101	NA	0.74304	0	0	0	0	0	0	0	0
21ur-15447	WBGene00172647	6.25997	0.0734806	0.135577	0	0	0	0	0	30.3455	0	0	0
21ur-15479	WBGene00170953	4.91841	0.160286	NA	0.24768	0	0	0	0	0	0	0	0
21ur-15485	WBGene00171648	5.58596	0.110557	0.185159	0.24768	0	0	0	11.84	0	0	0	0
21ur-15486	WBGene00168772	5.58596	0.110557	NA	0.24768	0	0	4.80455	0	0	0	0	0
21ur-15493	WBGene00169379	5.50851	0.115608	0.185995	0	0	0	0	11.84	0	0	0	0
21ur-15494	WBGene00165988	4.9204	0.160115	NA	0	0.252225	0	0	0	0	0	0	0
21ur-15496	WBGene00172093	4.91841	0.160286	NA	0.24768	0	0	0	0	0	0	0	0
21ur-15499	WBGene00172638	-0.548867	0.86854	NA	0	0	0	0	0	0	0	0	3.46442
21ur-15514	WBGene00165756	9.08571	0.00851704	0.0261976	0	0	0	0	94.7204	0	0	0	0
21ur-15523	WBGene00173957	13.1453	1.45361e-11	4.89017e-10	7.92576	7.56675	7.59796	792.75	378.882	333.801	0	0	0
21ur-15530	WBGene00167962	5.27524	0.131928	NA	0.99072	0.252225	0	0	0	0	0	0	0
21ur-15531	WBGene00171346	5.62822	0.107875	NA	1.73376	1.0089	0	0	0	0	0	0	0
21ur-15532	WBGene00166911	5.02651	0.151245	NA	0	0.50445	0	0	0	0	0	0	0
21ur-15536	WBGene00169891	5.58596	0.110557	0.185159	0.24768	0	0	0	0	15.1728	0	0	0
21ur-15537	WBGene00168075	9.49767	0.000969841	0.00432623	0.24768	0	0	86.4818	35.5201	0	0	0	0
21ur-15538	WBGene00171291	4.91841	0.160286	NA	0.24768	0	0	0	0	0	0	0	0
21ur-15539	WBGene00167006	5.19849	0.137672	NA	0.99072	0	0	0	0	0	0	0	0
21ur-15540	WBGene00172937	5.50851	0.115608	0.185995	0	0	0	0	11.84	0	0	0	0
21ur-15546	WBGene00171407	5.47102	0.118118	NA	0.99072	1.0089	0	0	0	0	0	0	0
21ur-15549	WBGene00168947	5.58728	0.110472	0.185159	0	0.252225	0	0	11.84	0	0	0	0
21ur-15550	WBGene00173560	5.78112	0.0986012	NA	0.74304	0.252225	3.79898	0	0	0	0	0	0
21ur-15553	WBGene00165119	6.25997	0.0734806	0.135577	0	0	0	0	23.6801	0	0	0	0
21ur-15566	WBGene00172729	8.7182	0.00127109	0.00543382	1.2384	1.26112	0	67.2637	0	0	0	0	0
21ur-15567	WBGene00171512	6.25997	0.0734806	0.135577	0	0	0	9.60909	0	0	0	0	0
21ur-15570	WBGene00169860	7.12904	0.0407457	0.0892319	0	0.756675	0	19.2182	0	0	0	0	0
21ur-15572	WBGene00168845	5.50851	0.115608	0.185995	0	0	0	0	11.84	0	0	0	0
21ur-15576	WBGene00169072	4.25606	0.0417523	0.0909058	1.73376	1.0089	0	14.4136	59.2002	0	0	1.77529	0
21ur-15579	WBGene00166375	8.5658	3.2009e-07	4.1133e-06	3.96288	3.27892	7.59796	19.2182	11.84	30.3455	0	0	0
21ur-15580	WBGene00174927	6.58895	0.00110646	0.00482303	1.48608	0.252225	3.79898	0	35.5201	91.0365	0	0.560617	0
21ur-15583	WBGene00171984	10.8229	4.23672e-10	1.05651e-08	9.41184	11.3501	11.3969	177.768	82.8803	15.1728	0	0	0
21ur-15586	WBGene00173884	9.8717	1.8341e-05	0.000140855	1.73376	1.51335	0	52.85	106.56	0	0	0	0
21ur-15588	WBGene00168399	6.88905	0.00117106	0.0050659	0.99072	0.252225	0	374.755	248.641	60.691	2.82872	0	0
21ur-15589	WBGene00173698	9.58649	7.17885e-10	1.69535e-08	18.3283	22.448	11.3969	24.0227	0	60.691	0	0	0
21ur-15591	WBGene00172029	7.81819	0.00429239	0.0149528	1.2384	1.51335	0	33.6318	0	0	0	0	0
21ur-15592	WBGene00166772	5.11547	0.144101	NA	0.74304	0	0	0	0	0	0	0	0
21ur-15594	WBGene00173667	8.50674	9.03755e-07	1.01772e-05	8.6688	10.3412	0	9.60909	23.6801	15.1728	0	0	0
21ur-1560	WBGene00050152	7.34884	0.0199028	0.0517991	0.24768	0.252225	0	24.0227	0	0	0	0	0
21ur-15601	WBGene00174648	8.65226	0.00100881	0.00446145	1.73376	2.27002	0	62.4591	0	0	0	0	0
21ur-15617	WBGene00172410	5.41057	0.122255	NA	0.99072	0.756675	0	0	0	0	0	0	0
21ur-1562	WBGene00048740	4.91841	0.160286	NA	0.24768	0	0	0	0	0	0	0	0
21ur-15622	WBGene00172406	5.57885	0.111013	NA	1.48608	1.0089	0	0	0	0	0	0	0
21ur-15624	WBGene00165194	8.27354	0.000342165	0.00177392	0.24768	0.252225	0	19.2182	23.6801	15.1728	0	0	0
21ur-15630	WBGene00165356	5.58596	0.110557	NA	0.24768	0	3.79898	0	0	0	0	0	0
21ur-15671	WBGene00169514	9.46655	0.00147208	0.00614499	0	0.252225	0	4.80455	118.4	0	0	0	0
21ur-15673	WBGene00171114	11.8404	1.65601e-09	3.66412e-08	2.72448	3.0267	3.79898	230.618	248.641	136.555	0	0	0
21ur-15687	WBGene00174642	4.91841	0.160286	NA	0.24768	0	0	0	0	0	0	0	0
21ur-15689	WBGene00170060	4.91841	0.160286	NA	0.24768	0	0	0	0	0	0	0	0
21ur-15690	WBGene00168307	4.9204	0.160115	NA	0	0.252225	0	0	0	0	0	0	0
21ur-15691	WBGene00174032	5.58596	0.110557	NA	0.24768	0	0	4.80455	0	0	0	0	0
21ur-15696	WBGene00174742	5.27395	0.132023	NA	1.2384	0	0	0	0	0	0	0	0
21ur-15702	WBGene00173415	5.58728	0.110472	0.185159	0	0.252225	0	0	11.84	0	0	0	0
21ur-1571	WBGene00045589	5.12015	0.143733	NA	0	0.756675	0	0	0	0	0	0	0
21ur-1572	WBGene00045645	4.91841	0.160286	NA	0.24768	0	0	0	0	0	0	0	0
21ur-1600	WBGene00046564	6.78709	0.051756	0.107052	0	0.252225	0	14.4136	0	0	0	0	0
21ur-1602	WBGene00046390	8.21771	0.000731575	0.00339835	0.49536	0.756675	7.59796	0	47.3602	0	0	0	0
21ur-1603	WBGene00047294	5.50851	0.115608	0.185995	0	0	0	0	11.84	0	0	0	0
21ur-1608	WBGene00047048	4.9204	0.160115	NA	0	0.252225	0	0	0	0	0	0	0
21ur-1623	WBGene00050118	4.9204	0.160115	NA	0	0.252225	0	0	0	0	0	0	0
21ur-1626	WBGene00046435	6.25997	0.0734806	0.135577	0	0	0	9.60909	0	0	0	0	0
21ur-1637	WBGene00050357	5.02651	0.151245	NA	0	0.50445	0	0	0	0	0	0	0
21ur-1644	WBGene00047476	5.47205	0.118049	NA	0.74304	1.26112	0	0	0	0	0	0	0
21ur-1647	WBGene00045898	7.57307	0.0115558	0.0336622	0.24768	0.756675	0	28.8273	0	0	0	0	0
21ur-1662	WBGene00050477	6.25997	0.0734806	0.135577	0	0	0	9.60909	0	0	0	0	0
21ur-1666	WBGene00049528	1.78511	0.597521	NA	0	0	0	0	0	0	0	0.654053	0
21ur-1667	WBGene00048222	4.9204	0.160115	NA	0	0.252225	0	0	0	0	0	0	0
21ur-1675	WBGene00048052	5.20132	0.137457	NA	0.49536	0.50445	0	0	0	0	0	0	0
21ur-1685	WBGene00050691	4.91841	0.160286	NA	0.24768	0	0	0	0	0	0	0	0
21ur-1694	WBGene00047265	5.50851	0.115608	NA	0	0	3.79898	0	0	0	0	0	0
21ur-170	WBGene00050300	7.08133	0.0421496	0.0912729	0	0	0	19.2182	0	0	0	0	0
21ur-1705	WBGene00048570	5.11547	0.144101	NA	0.74304	0	0	0	0	0	0	0	0
21ur-1719	WBGene00049623	4.91841	0.160286	NA	0.24768	0	0	0	0	0	0	0	0
21ur-1729	WBGene00049522	4.91841	0.160286	NA	0.24768	0	0	0	0	0	0	0	0
21ur-1741	WBGene00047630	4.91841	0.160286	NA	0.24768	0	0	0	0	0	0	0	0
21ur-1749	WBGene00047205	10.8839	9.07834e-08	1.35832e-06	4.21056	2.0178	0	124.918	59.2002	136.555	0	0	0
21ur-1767	WBGene00047039	5.02477	0.151387	NA	0.24768	0.252225	0	0	0	0	0	0	0
21ur-178	WBGene00045869	4.91841	0.160286	NA	0.24768	0	0	0	0	0	0	0	0
21ur-1789	WBGene00048274	5.6562	0.106128	0.180301	0.49536	0	0	0	11.84	0	0	0	0
21ur-1792	WBGene00049740	5.34559	0.126828	NA	0.99072	0.50445	0	0	0	0	0	0	0
21ur-1793	WBGene00050429	4.9204	0.160115	NA	0	0.252225	0	0	0	0	0	0	0
21ur-182	WBGene00046655	4.91841	0.160286	NA	0.24768	0	0	0	0	0	0	0	0
21ur-1821	WBGene00049543	4.91841	0.160286	NA	0.24768	0	0	0	0	0	0	0	0
21ur-1829	WBGene00048874	6.9089	0.00494681	0.0168244	0.49536	1.0089	0	9.60909	11.84	0	0	0	0
21ur-1833	WBGene00047777	4.91841	0.160286	NA	0.24768	0	0	0	0	0	0	0	0
21ur-1834	WBGene00048068	5.27654	0.131833	NA	0.74304	0.50445	0	0	0	0	0	0	0
21ur-1837	WBGene00046059	5.50851	0.115608	NA	0	0	0	4.80455	0	0	0	0	0
21ur-184	WBGene00048147	8.30934	0.000938139	0.00420629	6.68736	3.78337	0	0	47.3602	0	0	0	0
21ur-1849	WBGene00048571	4.91841	0.160286	NA	0.24768	0	0	0	0	0	0	0	0
21ur-1857	WBGene00046019	5.02651	0.151245	NA	0	0.50445	0	0	0	0	0	0	0
21ur-1858	WBGene00048250	4.9204	0.160115	NA	0	0.252225	0	0	0	0	0	0	0
21ur-1862	WBGene00049725	8.85003	0.00884101	0.0270193	0	0	0	43.2409	35.5201	0	0	0	0
21ur-1866	WBGene00049657	5.50851	0.115608	NA	0	0	0	4.80455	0	0	0	0	0
21ur-1885	WBGene00047907	4.91841	0.160286	NA	0.24768	0	0	0	0	0	0	0	0
21ur-1888	WBGene00049875	5.81049	0.0529447	0.108288	0.49536	0.756675	0	0	0	15.1728	0	0	0
21ur-1890	WBGene00050837	4.91841	0.160286	NA	0.24768	0	0	0	0	0	0	0	0
21ur-1900	WBGene00050541	6.73318	0.000143038	0.000834587	2.4768	2.0178	3.79898	221.009	248.641	75.8638	2.50233	0	0
21ur-1906	WBGene00046415	8.68525	0.000242386	0.0013136	0.99072	2.52225	0	0	59.2002	15.1728	0	0	0
21ur-1912	WBGene00045778	6.31967	0.0707259	0.135577	0.24768	0	0	9.60909	0	0	0	0	0
21ur-1943	WBGene00047387	7.80581	0.0107901	0.0318258	0.24768	0	0	4.80455	35.5201	0	0	0	0
21ur-1953	WBGene00050500	4.91841	0.160286	NA	0.24768	0	0	0	0	0	0	0	0
21ur-1973	WBGene00048820	4.91841	0.160286	NA	0.24768	0	0	0	0	0	0	0	0
21ur-1974	WBGene00048099	6.27822	0.0588375	0.117984	1.73376	2.0178	0	4.80455	0	0	0	0	0
21ur-1982	WBGene00049325	8.7133	0.0117669	0.0341513	0	0	0	0	0	75.8638	0	0	0
21ur-199	WBGene00047835	1.61387	NA	NA	0	0	0	0	47.3602	0	7.18059	0	0
21ur-200	WBGene00049391	6.31967	0.0707259	0.135577	0.24768	0	0	0	23.6801	0	0	0	0
21ur-2014	WBGene00048799	8.7871	0.000571215	0.00275699	0.24768	0.252225	0	33.6318	0	45.5183	0	0	0
21ur-2024	WBGene00046844	5.72393	0.101993	0.175357	0	0.756675	0	0	11.84	0	0	0	0
21ur-2036	WBGene00049718	7.54877	0.0300353	0.0711715	0	0.50445	0	0	35.5201	0	0	0	0
21ur-2051	WBGene00049047	5.12015	0.143733	NA	0	0.756675	0	0	0	0	0	0	0
21ur-2058	WBGene00046270	5.50851	0.115608	NA	0	0	0	4.80455	0	0	0	0	0
21ur-206	WBGene00050281	4.91841	0.160286	NA	0.24768	0	0	0	0	0	0	0	0
21ur-2075	WBGene00050248	5.50851	0.115608	0.185995	0	0	0	0	11.84	0	0	0	0
21ur-2080	WBGene00045716	8.65235	0.0123947	0.0356495	0	0	0	0	71.0403	0	0	0	0
21ur-2087	WBGene00046514	4.91841	0.160286	NA	0.24768	0	0	0	0	0	0	0	0
21ur-2099	WBGene00047552	4.91841	0.160286	NA	0.24768	0	0	0	0	0	0	0	0
21ur-210	WBGene00050548	4.91841	0.160286	NA	0.24768	0	0	0	0	0	0	0	0
21ur-2105	WBGene00048984	5.19849	0.137672	NA	0.99072	0	0	0	0	0	0	0	0
21ur-2118	WBGene00049174	7.49792	0.0110302	0.0323858	0.99072	0.252225	0	0	35.5201	0	0	0	0
21ur-2121	WBGene00048377	6.54894	0.0390457	0.0860906	1.2384	0.756675	0	9.60909	0	0	0	0	0
21ur-2148	WBGene00045536	4.91841	0.160286	NA	0.24768	0	0	0	0	0	0	0	0
21ur-2151	WBGene00048647	4.9204	0.160115	NA	0	0.252225	0	0	0	0	0	0	0
21ur-2152	WBGene00048355	5.27654	0.131833	NA	0.74304	0.50445	0	0	0	0	0	0	0
21ur-2155	WBGene00050122	4.91841	0.160286	NA	0.24768	0	0	0	0	0	0	0	0
21ur-2161	WBGene00047082	7.47281	0.0317692	0.0731605	0	0	0	0	35.5201	0	0	0	0
21ur-2162	WBGene00046337	5.12015	0.143733	NA	0	0.756675	0	0	0	0	0	0	0
21ur-2174	WBGene00047988	8.05322	0.0203712	0.0527483	0	0.50445	0	0	47.3602	0	0	0	0
21ur-2183	WBGene00049445	4.91841	0.160286	NA	0.24768	0	0	0	0	0	0	0	0
21ur-2188	WBGene00045713	4.91841	0.160286	NA	0.24768	0	0	0	0	0	0	0	0
21ur-2189	WBGene00045711	8.03646	0.0206435	0.0531129	0	0	0	0	47.3602	0	0	0	0
21ur-2202	WBGene00048335	6.25997	0.0734806	0.135577	0	0	0	0	0	30.3455	0	0	0
21ur-2212	WBGene00048825	5.11547	0.144101	NA	0.74304	0	0	0	0	0	0	0	0
21ur-2239	WBGene00045927	5.64469	0.0887812	0.157319	0.24768	0.252225	0	0	11.84	0	0	0	0
21ur-2245	WBGene00046651	5.50851	0.115608	NA	0	0	3.79898	0	0	0	0	0	0
21ur-2247	WBGene00048063	4.91841	0.160286	NA	0.24768	0	0	0	0	0	0	0	0
21ur-2251	WBGene00046401	5.27395	0.132023	NA	1.2384	0	0	0	0	0	0	0	0
21ur-2266	WBGene00049083	5.02302	0.15153	NA	0.49536	0	0	0	0	0	0	0	0
21ur-2276	WBGene00049573	5.50851	0.115608	0.185995	0	0	0	0	0	15.1728	0	0	0
21ur-2305	WBGene00050409	5.02651	0.151245	NA	0	0.50445	0	0	0	0	0	0	0
21ur-2309	WBGene00045992	5.6562	0.106128	NA	0.49536	0	0	4.80455	0	0	0	0	0
21ur-231	WBGene00045562	5.02302	0.15153	NA	0.49536	0	0	0	0	0	0	0	0
21ur-2317	WBGene00049701	4.9204	0.160115	NA	0	0.252225	0	0	0	0	0	0	0
21ur-2318	WBGene00050269	5.19991	0.137564	NA	0.74304	0.252225	0	0	0	0	0	0	0
21ur-2320	WBGene00049749	6.25997	0.0734806	0.135577	0	0	0	0	23.6801	0	0	0	0
21ur-2322	WBGene00048205	8.49542	0.014153	0.0396461	0	0	0	4.80455	0	60.691	0	0	0
21ur-2327	WBGene00048164	4.91841	0.160286	NA	0.24768	0	0	0	0	0	0	0	0
21ur-2353	WBGene00046628	5.11703	0.143978	NA	0.49536	0.252225	0	0	0	0	0	0	0
21ur-2359	WBGene00048338	5.02477	0.151387	NA	0.24768	0.252225	0	0	0	0	0	0	0
21ur-2369	WBGene00047141	5.02302	0.15153	NA	0.49536	0	0	0	0	0	0	0	0
21ur-2378	WBGene00049262	5.02651	0.151245	NA	0	0.50445	0	0	0	0	0	0	0
21ur-2380	WBGene00046294	7.85353	1.28617e-05	0.000104278	3.21984	3.27892	7.59796	14.4136	11.84	0	0	0	0
21ur-2381	WBGene00048674	5.02302	0.15153	NA	0.49536	0	0	0	0	0	0	0	0
21ur-2387	WBGene00047635	5.27654	0.131833	NA	0.74304	0.50445	0	0	0	0	0	0	0
21ur-2395	WBGene00046919	9.68781	6.18973e-05	0.000403275	1.73376	0.252225	0	57.6546	82.8803	0	0	0	0
21ur-2397	WBGene00045728	5.27395	0.132023	NA	1.2384	0	0	0	0	0	0	0	0
21ur-2402	WBGene00046148	5.11703	0.143978	NA	0.49536	0.252225	0	0	0	0	0	0	0
21ur-2414	WBGene00049422	4.9204	0.160115	NA	0	0.252225	0	0	0	0	0	0	0
21ur-2421	WBGene00045951	4.9204	0.160115	NA	0	0.252225	0	0	0	0	0	0	0
21ur-2429	WBGene00048299	5.02477	0.151387	NA	0.24768	0.252225	0	0	0	0	0	0	0
21ur-2432	WBGene00050702	4.91841	0.160286	NA	0.24768	0	0	0	0	0	0	0	0
21ur-244	WBGene00048452	8.28591	0.0168505	0.045242	0	0	0	0	11.84	45.5183	0	0	0
21ur-2444	WBGene00050830	5.62735	0.10793	NA	1.98144	0.756675	0	0	0	0	0	0	0
21ur-2478	WBGene00050729	4.9204	0.160115	NA	0	0.252225	0	0	0	0	0	0	0
21ur-2503	WBGene00047652	4.9204	0.160115	NA	0	0.252225	0	0	0	0	0	0	0
21ur-2505	WBGene00048833	4.91841	0.160286	NA	0.24768	0	0	0	0	0	0	0	0
21ur-2549	WBGene00048582	8.7851	0.000466136	0.00231564	0.99072	0	0	9.60909	11.84	60.691	0	0	0
21ur-2571	WBGene00050038	5.02651	0.151245	NA	0	0.50445	0	0	0	0	0	0	0
21ur-2573	WBGene00048802	5.11703	0.143978	NA	0.49536	0.252225	0	0	0	0	0	0	0
21ur-2575	WBGene00049940	5.11859	0.143856	NA	0.24768	0.50445	0	0	0	0	0	0	0
21ur-2580	WBGene00048817	4.9204	0.160115	NA	0	0.252225	0	0	0	0	0	0	0
21ur-2590	WBGene00049113	5.41057	0.122255	NA	0.99072	0.756675	0	0	0	0	0	0	0
21ur-2592	WBGene00047441	5.27524	0.131928	NA	0.99072	0.252225	0	0	0	0	0	0	0
21ur-2620	WBGene00048828	3.88061	0.266941	NA	0	0	0	0	0	0	0	0.0934361	0
21ur-2636	WBGene00047289	4.91841	0.160286	NA	0.24768	0	0	0	0	0	0	0	0
21ur-2640	WBGene00046821	5.20413	0.137243	NA	0	1.0089	0	0	0	0	0	0	0
21ur-2644	WBGene00049119	9.75571	0.00306563	0.0113207	0	0	0	86.4818	0	60.691	0	0	0
21ur-2649	WBGene00045751	4.9204	0.160115	NA	0	0.252225	0	0	0	0	0	0	0
21ur-265	WBGene00046094	5.02477	0.151387	NA	0.24768	0.252225	0	0	0	0	0	0	0
21ur-2658	WBGene00046871	0.710717	0.831443	NA	0	0	0	0	0	0	0	1.40154	0
21ur-2659	WBGene00049771	4.9204	0.160115	NA	0	0.252225	0	0	0	0	0	0	0
21ur-2661	WBGene00046060	5.27524	0.131928	NA	0.99072	0.252225	0	0	0	0	0	0	0
21ur-2669	WBGene00047557	5.58596	0.110557	0.185159	0.24768	0	0	0	11.84	0	0	0	0
21ur-2676	WBGene00048353	5.72281	0.10206	0.175357	0.24768	0.50445	0	4.80455	0	0	0	0	0
21ur-2681	WBGene00050083	6.76551	0.0525287	0.107633	0	0	0	14.4136	0	0	0	0	0
21ur-2691	WBGene00047256	5.78009	0.0986617	0.170915	0.99072	0	0	0	11.84	0	0	0	0
21ur-2694	WBGene00049564	5.19849	0.137672	NA	0.99072	0	0	0	0	0	0	0	0
21ur-2697	WBGene00047770	4.91841	0.160286	NA	0.24768	0	0	0	0	0	0	0	0
21ur-272	WBGene00049841	5.57976	0.110954	NA	1.2384	1.26112	0	0	0	0	0	0	0
21ur-2728	WBGene00045870	4.9204	0.160115	NA	0	0.252225	0	0	0	0	0	0	0
21ur-2744	WBGene00047153	4.9204	0.160115	NA	0	0.252225	0	0	0	0	0	0	0
21ur-2751	WBGene00046112	5.02651	0.151245	NA	0	0.50445	0	0	0	0	0	0	0
21ur-2757	WBGene00047303	4.91841	0.160286	NA	0.24768	0	0	0	0	0	0	0	0
21ur-2761	WBGene00049789	7.42988	0.0155852	0.0428943	0.24768	0.252225	0	0	35.5201	0	0	0	0
21ur-2765	WBGene00049218	5.11703	0.143978	NA	0.49536	0.252225	0	0	0	0	0	0	0
21ur-2781	WBGene00050712	5.98524	0.087228	0.155217	0.99072	1.0089	0	4.80455	0	0	0	0	0
21ur-2784	WBGene00050573	4.91841	0.160286	NA	0.24768	0	0	0	0	0	0	0	0
21ur-2786	WBGene00045672	4.91841	0.160286	NA	0.24768	0	0	0	0	0	0	0	0
21ur-2792	WBGene00049839	5.20273	0.13735	NA	0.24768	0.756675	0	0	0	0	0	0	0
21ur-2795	WBGene00047462	7.88867	0.023188	0.0581301	0.24768	0	0	38.4364	0	0	0	0	0
21ur-281	WBGene00046421	4.9204	0.160115	NA	0	0.252225	0	0	0	0	0	0	0
21ur-2814	WBGene00046335	6.25997	0.0734806	0.135577	0	0	0	0	23.6801	0	0	0	0
21ur-2820	WBGene00046357	4.91841	0.160286	NA	0.24768	0	0	0	0	0	0	0	0
21ur-2828	WBGene00046999	5.50851	0.115608	0.185995	0	0	0	0	11.84	0	0	0	0
21ur-2832	WBGene00049494	9.17475	5.86831e-05	0.000385503	1.2384	1.76557	0	28.8273	71.0403	0	0	0	0
21ur-2836	WBGene00049848	8.50883	0.0135753	0.0383313	0	0	0	38.4364	23.6801	0	0	0	0
21ur-284	WBGene00047007	4.9204	0.160115	NA	0	0.252225	0	0	0	0	0	0	0
21ur-2846	WBGene00048793	7.08133	0.0421496	0.0912729	0	0	0	19.2182	0	0	0	0	0
21ur-2861	WBGene00047529	4.91841	0.160286	NA	0.24768	0	0	0	0	0	0	0	0
21ur-2869	WBGene00049968	6.25997	0.0734806	0.135577	0	0	0	0	0	30.3455	0	0	0
21ur-2876	WBGene00045640	4.91841	0.160286	NA	0.24768	0	0	0	0	0	0	0	0
21ur-2882	WBGene00046757	4.91841	0.160286	NA	0.24768	0	0	0	0	0	0	0	0
21ur-2884	WBGene00047647	8.72068	0.0108691	0.0320105	0	0	0	14.4136	0	60.691	0	0	0
21ur-2907	WBGene00048613	0.301731	0.92779	NA	0	0	0	0	0	0	0	1.86872	0
21ur-2918	WBGene00045597	5.50851	0.115608	0.185995	0	0	0	0	11.84	0	0	0	0
21ur-2935	WBGene00046109	5.72027	0.102212	NA	1.98144	1.26112	0	0	0	0	0	0	0
21ur-2941	WBGene00045952	5.27782	0.131738	NA	0.49536	0.756675	0	0	0	0	0	0	0
21ur-2943	WBGene00049742	9.0482	0.00113784	0.00494019	0.74304	0.756675	0	86.4818	0	0	0	0	0
21ur-2954	WBGene00045622	6.26533	0.0732296	0.135577	0.49536	0.252225	7.59796	0	0	0	0	0	0
21ur-2960	WBGene00046353	5.02651	0.151245	NA	0	0.50445	0	0	0	0	0	0	0
21ur-2968	WBGene00046843	8.66873	0.0109177	0.0321291	0.49536	0	0	67.2637	0	0	0	0	0
21ur-297	WBGene00046267	5.6562	0.106128	NA	0.49536	0	0	4.80455	0	0	0	0	0
21ur-2970	WBGene00049507	4.91841	0.160286	NA	0.24768	0	0	0	0	0	0	0	0
21ur-2972	WBGene00050632	5.02477	0.151387	NA	0.24768	0.252225	0	0	0	0	0	0	0
21ur-298	WBGene00046734	4.91841	0.160286	NA	0.24768	0	0	0	0	0	0	0	0
21ur-2982	WBGene00047852	4.91841	0.160286	NA	0.24768	0	0	0	0	0	0	0	0
21ur-3003	WBGene00046981	5.11859	0.143856	NA	0.24768	0.50445	0	0	0	0	0	0	0
21ur-3008	WBGene00046433	4.91841	0.160286	NA	0.24768	0	0	0	0	0	0	0	0
21ur-3038	WBGene00048532	4.9204	0.160115	NA	0	0.252225	0	0	0	0	0	0	0
21ur-3052	WBGene00046499	5.11703	0.143978	NA	0.49536	0.252225	0	0	0	0	0	0	0
21ur-3058	WBGene00049228	5.3432	0.126998	NA	1.48608	0	0	0	0	0	0	0	0
21ur-3062	WBGene00046367	5.50851	0.115608	0.185995	0	0	0	0	11.84	0	0	0	0
21ur-3076	WBGene00046612	4.91841	0.160286	NA	0.24768	0	0	0	0	0	0	0	0
21ur-3080	WBGene00047561	4.91841	0.160286	NA	0.24768	0	0	0	0	0	0	0	0
21ur-3101	WBGene00046035	5.57794	0.111072	NA	1.73376	0.756675	0	0	0	0	0	0	0
21ur-3105	WBGene00048411	4.91841	0.160286	NA	0.24768	0	0	0	0	0	0	0	0
21ur-3106	WBGene00045796	5.02651	0.151245	NA	0	0.50445	0	0	0	0	0	0	0
21ur-3119	WBGene00050551	5.27911	0.131643	NA	0.24768	1.0089	0	0	0	0	0	0	0
21ur-3125	WBGene00049863	4.91841	0.160286	NA	0.24768	0	0	0	0	0	0	0	0
21ur-3131	WBGene00046220	5.50851	0.115608	0.185995	0	0	0	0	11.84	0	0	0	0
21ur-314	WBGene00048696	6.80173	0.042473	0.0918055	0.24768	0.252225	0	14.4136	0	0	0	0	0
21ur-3140	WBGene00048626	5.34678	0.126743	NA	0.74304	0.756675	0	0	0	0	0	0	0
21ur-3145	WBGene00047811	4.91841	0.160286	NA	0.24768	0	0	0	0	0	0	0	0
21ur-3154	WBGene00048424	5.50851	0.115608	0.185995	0	0	0	0	0	15.1728	0	0	0
21ur-3155	WBGene00050718	4.91841	0.160286	NA	0.24768	0	0	0	0	0	0	0	0
21ur-3169	WBGene00046835	5.91622	0.0909488	NA	2.72448	1.76557	0	0	0	0	0	0	0
21ur-3180	WBGene00050028	8.1772	0.00139954	0.00589524	0.74304	0.252225	0	0	11.84	45.5183	0	0	0
21ur-3185	WBGene00046020	5.20273	0.13735	NA	0.24768	0.756675	0	0	0	0	0	0	0
21ur-3187	WBGene00047810	6.25486	0.021519	0.0548708	0.24768	0.252225	0	4.80455	11.84	0	0	0	0
21ur-319	WBGene00050558	4.9204	0.160115	NA	0	0.252225	0	0	0	0	0	0	0
21ur-3202	WBGene00049153	5.50851	0.115608	NA	0	0	0	4.80455	0	0	0	0	0
21ur-3217	WBGene00046720	8.17483	0.0184608	0.0487279	0	0	0	48.0455	0	0	0	0	0
21ur-322	WBGene00049404	4.91841	0.160286	NA	0.24768	0	0	0	0	0	0	0	0
21ur-3223	WBGene00046147	5.50851	0.115608	0.185995	0	0	0	0	11.84	0	0	0	0
21ur-3224	WBGene00046749	4.9204	0.160115	NA	0	0.252225	0	0	0	0	0	0	0
21ur-3226	WBGene00048106	4.91841	0.160286	NA	0.24768	0	0	0	0	0	0	0	0
21ur-3238	WBGene00046207	6.25997	0.0734806	0.135577	0	0	0	0	23.6801	0	0	0	0
21ur-3240	WBGene00049059	10.6757	1.01378e-06	1.12039e-05	0.74304	0.756675	0	115.309	59.2002	106.209	0	0	0
21ur-3271	WBGene00046226	5.02651	0.151245	NA	0	0.50445	0	0	0	0	0	0	0
21ur-3274	WBGene00048072	8.70266	0.000651143	0.00308227	0.24768	0.50445	0	0	47.3602	30.3455	0	0	0
21ur-328	WBGene00046698	5.57794	0.111072	NA	1.73376	0.756675	0	0	0	0	0	0	0
21ur-3280	WBGene00045537	5.02651	0.151245	NA	0	0.50445	0	0	0	0	0	0	0
21ur-329	WBGene00049075	5.41168	0.122178	NA	0.74304	1.0089	0	0	0	0	0	0	0
21ur-33	WBGene00047250	5.58068	0.110896	NA	0.99072	1.51335	0	0	0	0	0	0	0
21ur-3314	WBGene00046350	8.88524	0.0101478	0.0302079	0	0	0	0	82.8803	0	0	0	0
21ur-3329	WBGene00047259	4.91841	0.160286	NA	0.24768	0	0	0	0	0	0	0	0
21ur-333	WBGene00046209	5.47308	0.117979	NA	0.49536	1.51335	0	0	0	0	0	0	0
21ur-3334	WBGene00049844	2.48295	0.467194	NA	0	0	0	0	0	0	0	0.373745	0
21ur-3337	WBGene00046765	4.91841	0.160286	NA	0.24768	0	0	0	0	0	0	0	0
21ur-3347	WBGene00045717	5.50851	0.115608	0.185995	0	0	0	0	11.84	0	0	0	0
21ur-3359	WBGene00049601	6.24368	0.0742478	0.136819	0	0.252225	3.79898	4.80455	0	0	0	0	0
21ur-3360	WBGene00046008	5.02302	0.15153	NA	0.49536	0	0	0	0	0	0	0	0
21ur-3362	WBGene00047521	5.02302	0.15153	NA	0.49536	0	0	0	0	0	0	0	0
21ur-3370	WBGene00048454	5.02477	0.151387	NA	0.24768	0.252225	0	0	0	0	0	0	0
21ur-3377	WBGene00048176	5.27654	0.131833	NA	0.74304	0.50445	0	0	0	0	0	0	0
21ur-3378	WBGene00050282	5.34559	0.126828	NA	0.99072	0.50445	0	0	0	0	0	0	0
21ur-3380	WBGene00048441	5.27782	0.131738	NA	0.49536	0.756675	0	0	0	0	0	0	0
21ur-3386	WBGene00047455	5.50851	0.115608	0.185995	0	0	0	0	11.84	0	0	0	0
21ur-3387	WBGene00048267	5.20273	0.13735	NA	0.24768	0.756675	0	0	0	0	0	0	0
21ur-339	WBGene00050839	4.91841	0.160286	NA	0.24768	0	0	0	0	0	0	0	0
21ur-3391	WBGene00047914	4.9204	0.160115	NA	0	0.252225	0	0	0	0	0	0	0
21ur-3400	WBGene00049363	6.94466	0.00990052	0.02966	0	0.252225	0	4.80455	11.84	15.1728	0	0	0
21ur-3410	WBGene00046697	5.20413	0.137243	NA	0	1.0089	0	0	0	0	0	0	0
21ur-3437	WBGene00049327	4.91841	0.160286	NA	0.24768	0	0	0	0	0	0	0	0
21ur-3443	WBGene00048260	4.9204	0.160115	NA	0	0.252225	0	0	0	0	0	0	0
21ur-3456	WBGene00047839	5.50851	0.115608	0.185995	0	0	0	0	11.84	0	0	0	0
21ur-346	WBGene00047260	5.11703	0.143978	NA	0.49536	0.252225	0	0	0	0	0	0	0
21ur-3469	WBGene00048688	8.43635	0.014871	0.0412364	0	0	0	57.6546	0	0	0	0	0
21ur-3478	WBGene00046005	4.9204	0.160115	NA	0	0.252225	0	0	0	0	0	0	0
21ur-3485	WBGene00048326	5.5825	0.110779	NA	0.49536	2.0178	0	0	0	0	0	0	0
21ur-349	WBGene00047549	4.91841	0.160286	NA	0.24768	0	0	0	0	0	0	0	0
21ur-3490	WBGene00050302	5.40836	0.122408	NA	1.48608	0.252225	0	0	0	0	0	0	0
21ur-3500	WBGene00047756	4.9204	0.160115	NA	0	0.252225	0	0	0	0	0	0	0
21ur-3501	WBGene00048470	4.91841	0.160286	NA	0.24768	0	0	0	0	0	0	0	0
21ur-3513	WBGene00045637	5.52658	0.114414	NA	1.2384	1.0089	0	0	0	0	0	0	0
21ur-3523	WBGene00047519	6.62429	0.0325352	0.074601	0.99072	1.76557	0	9.60909	0	0	0	0	0
21ur-3526	WBGene00046195	6.02715	0.0850294	0.151911	1.73376	0.50445	3.79898	0	0	0	0	0	0
21ur-3531	WBGene00046519	4.9204	0.160115	NA	0	0.252225	0	0	0	0	0	0	0
21ur-3554	WBGene00046121	5.02302	0.15153	NA	0.49536	0	0	0	0	0	0	0	0
21ur-3556	WBGene00048889	8.17849	0.000762681	0.00352432	1.2384	0.756675	0	0	11.84	45.5183	0	0	0
21ur-356	WBGene00048045	5.20273	0.13735	NA	0.24768	0.756675	0	0	0	0	0	0	0
21ur-3564	WBGene00050203	5.02477	0.151387	NA	0.24768	0.252225	0	0	0	0	0	0	0
21ur-3587	WBGene00048844	7.51105	0.0308856	0.0722138	0.24768	0	0	0	0	45.5183	0	0	0
21ur-3602	WBGene00047838	5.50851	0.115608	NA	0	0	0	4.80455	0	0	0	0	0
21ur-3606	WBGene00048829	5.02302	0.15153	NA	0.49536	0	0	0	0	0	0	0	0
21ur-363	WBGene00050606	4.91841	0.160286	NA	0.24768	0	0	0	0	0	0	0	0
21ur-3632	WBGene00050627	5.02477	0.151387	NA	0.24768	0.252225	0	0	0	0	0	0	0
21ur-3644	WBGene00049933	5.3432	0.126998	NA	1.48608	0	0	0	0	0	0	0	0
21ur-3647	WBGene00046345	4.91841	0.160286	NA	0.24768	0	0	0	0	0	0	0	0
21ur-3663	WBGene00048018	4.9204	0.160115	NA	0	0.252225	0	0	0	0	0	0	0
21ur-3664	WBGene00047496	7.75353	0.00968316	0.0291435	0.49536	0	0	24.0227	11.84	0	0	0	0
21ur-3666	WBGene00047657	5.98282	0.0873565	0.155355	1.73376	0.252225	0	4.80455	0	0	0	0	0
21ur-3674	WBGene00045906	5.46999	0.118188	NA	1.2384	0.756675	0	0	0	0	0	0	0
21ur-3682	WBGene00046192	4.9204	0.160115	NA	0	0.252225	0	0	0	0	0	0	0
21ur-3689	WBGene00048924	9.30278	1.07001e-05	8.88218e-05	6.43968	4.28782	0	72.0682	23.6801	0	0	0	0
21ur-3691	WBGene00050799	4.9204	0.160115	NA	0	0.252225	0	0	0	0	0	0	0
21ur-3699	WBGene00047199	4.9204	0.160115	NA	0	0.252225	0	0	0	0	0	0	0
21ur-3719	WBGene00048129	5.27524	0.131928	NA	0.99072	0.252225	0	0	0	0	0	0	0
21ur-3722	WBGene00048597	11.0422	4.27659e-10	1.06521e-08	11.3933	5.80117	3.79898	144.136	94.7204	106.209	0	0	0
21ur-3737	WBGene00048873	5.19991	0.137564	NA	0.74304	0.252225	0	0	0	0	0	0	0
21ur-3741	WBGene00049151	5.20273	0.13735	NA	0.24768	0.756675	0	0	0	0	0	0	0
21ur-3775	WBGene00049430	5.20413	0.137243	NA	0	1.0089	0	0	0	0	0	0	0
21ur-3789	WBGene00047917	5.11703	0.143978	NA	0.49536	0.252225	0	0	0	0	0	0	0
21ur-3791	WBGene00050679	4.91841	0.160286	NA	0.24768	0	0	0	0	0	0	0	0
21ur-3814	WBGene00048620	5.02302	0.15153	NA	0.49536	0	0	0	0	0	0	0	0
21ur-3816	WBGene00046960	4.91841	0.160286	NA	0.24768	0	0	0	0	0	0	0	0
21ur-3817	WBGene00047690	5.11859	0.143856	NA	0.24768	0.50445	0	0	0	0	0	0	0
21ur-384	WBGene00049285	5.19991	0.137564	NA	0.74304	0.252225	0	0	0	0	0	0	0
21ur-3847	WBGene00049550	5.50851	0.115608	0.185995	0	0	0	0	11.84	0	0	0	0
21ur-3878	WBGene00048921	8.03016	0.0207467	0.0532249	0	0	0	43.2409	0	0	0	0	0
21ur-3882	WBGene00047236	4.91841	0.160286	NA	0.24768	0	0	0	0	0	0	0	0
21ur-3892	WBGene00048453	5.50851	0.115608	0.185995	0	0	0	0	11.84	0	0	0	0
21ur-3899	WBGene00047991	5.50851	0.115608	0.185995	0	0	0	0	11.84	0	0	0	0
21ur-3942	WBGene00045813	9.97274	3.78361e-06	3.55686e-05	0.49536	1.26112	0	72.0682	71.0403	30.3455	0	0	0
21ur-3943	WBGene00050401	4.91841	0.160286	NA	0.24768	0	0	0	0	0	0	0	0
21ur-3945	WBGene00049169	4.9204	0.160115	NA	0	0.252225	0	0	0	0	0	0	0
21ur-3949	WBGene00049871	4.9204	0.160115	NA	0	0.252225	0	0	0	0	0	0	0
21ur-395	WBGene00049684	8.28591	0.0168505	0.045242	0	0	0	0	11.84	45.5183	0	0	0
21ur-3953	WBGene00047444	5.02302	0.15153	NA	0.49536	0	0	0	0	0	0	0	0
21ur-3954	WBGene00048020	5.02302	0.15153	NA	0.49536	0	0	0	0	0	0	0	0
21ur-3958	WBGene00047024	5.02477	0.151387	NA	0.24768	0.252225	0	0	0	0	0	0	0
21ur-3962	WBGene00047350	4.91841	0.160286	NA	0.24768	0	0	0	0	0	0	0	0
21ur-3970	WBGene00047877	5.11859	0.143856	NA	0.24768	0.50445	0	0	0	0	0	0	0
21ur-3979	WBGene00049024	5.02302	0.15153	NA	0.49536	0	0	0	0	0	0	0	0
21ur-3990	WBGene00049554	5.58728	0.110472	0.185159	0	0.252225	0	0	0	15.1728	0	0	0
21ur-4006	WBGene00049952	8.85429	0.00232161	0.00898248	0.49536	0	0	0	23.6801	60.691	0	0	0
21ur-4008	WBGene00048754	4.91841	0.160286	NA	0.24768	0	0	0	0	0	0	0	0
21ur-4009	WBGene00049139	5.11547	0.144101	NA	0.74304	0	0	0	0	0	0	0	0
21ur-4011	WBGene00048866	4.91841	0.160286	NA	0.24768	0	0	0	0	0	0	0	0
21ur-4018	WBGene00048215	4.91841	0.160286	NA	0.24768	0	0	0	0	0	0	0	0
21ur-4028	WBGene00047293	5.50851	0.115608	0.185995	0	0	0	0	11.84	0	0	0	0
21ur-4031	WBGene00046330	5.02302	0.15153	NA	0.49536	0	0	0	0	0	0	0	0
21ur-4042	WBGene00047755	5.19991	0.137564	NA	0.74304	0.252225	0	0	0	0	0	0	0
21ur-4044	WBGene00048680	5.62995	0.107767	NA	1.2384	1.51335	0	0	0	0	0	0	0
21ur-4068	WBGene00046559	8.93827	0.000160857	0.000921474	1.73376	1.51335	3.79898	0	82.8803	0	0	0	0
21ur-408	WBGene00046867	5.12015	0.143733	NA	0	0.756675	0	0	0	0	0	0	0
21ur-4082	WBGene00049079	4.91841	0.160286	NA	0.24768	0	0	0	0	0	0	0	0
21ur-4099	WBGene00046673	4.91841	0.160286	NA	0.24768	0	0	0	0	0	0	0	0
21ur-4112	WBGene00050441	5.3432	0.126998	NA	1.48608	0	0	0	0	0	0	0	0
21ur-4119	WBGene00048114	5.34559	0.126828	NA	0.99072	0.50445	0	0	0	0	0	0	0
21ur-4127	WBGene00050367	5.41168	0.122178	NA	0.74304	1.0089	0	0	0	0	0	0	0
21ur-4137	WBGene00049551	6.23716	0.0693962	0.134274	2.97216	0.50445	0	4.80455	0	0	0	0	0
21ur-4139	WBGene00048648	9.81145	0.000104537	0.000636143	0.49536	0.756675	0	0	23.6801	136.555	0	0	0
21ur-4144	WBGene00047122	5.78216	0.0985408	0.170915	0.49536	0.50445	0	4.80455	0	0	0	0	0
21ur-4157	WBGene00049352	9.26467	0.00688798	0.0220556	0.24768	0	0	0	106.56	0	0	0	0
21ur-4160	WBGene00045843	7.34884	0.0199028	0.0517991	0.24768	0.252225	0	24.0227	0	0	0	0	0
21ur-4167	WBGene00050651	7.25296	2.92589e-06	2.83549e-05	4.21056	4.79227	7.59796	105.7	153.921	91.0365	1.08797	0	0
21ur-4168	WBGene00048698	4.91841	0.160286	NA	0.24768	0	0	0	0	0	0	0	0
21ur-4177	WBGene00050580	-1.51685	NA	NA	0.99072	0.252225	0	0	0	0	0	0	9.35394
21ur-4183	WBGene00047796	4.91841	0.160286	NA	0.24768	0	0	0	0	0	0	0	0
21ur-4193	WBGene00046577	5.50851	0.115608	0.185995	0	0	0	0	11.84	0	0	0	0
21ur-420	WBGene00047349	6.76551	0.0525287	0.107633	0	0	0	14.4136	0	0	0	0	0
21ur-4200	WBGene00048633	9.48678	3.90209e-05	0.000272662	2.22912	1.0089	0	28.8273	94.7204	0	0	0	0
21ur-4208	WBGene00047943	7.06031	0.0427811	0.0920683	0	0	0	4.80455	23.6801	0	0	0	0
21ur-4210	WBGene00048265	5.11859	0.143856	NA	0.24768	0.50445	0	0	0	0	0	0	0
21ur-4211	WBGene00050860	5.27524	0.131928	NA	0.99072	0.252225	0	0	0	0	0	0	0
21ur-422	WBGene00045570	4.91841	0.160286	NA	0.24768	0	0	0	0	0	0	0	0
21ur-4223	WBGene00049735	5.11703	0.143978	NA	0.49536	0.252225	0	0	0	0	0	0	0
21ur-4235	WBGene00045648	4.91841	0.160286	NA	0.24768	0	0	0	0	0	0	0	0
21ur-4239	WBGene00048583	5.3432	0.126998	NA	1.48608	0	0	0	0	0	0	0	0
21ur-4241	WBGene00049362	5.02302	0.15153	NA	0.49536	0	0	0	0	0	0	0	0
21ur-4245	WBGene00049984	5.50851	0.115608	0.185995	0	0	0	0	11.84	0	0	0	0
21ur-4260	WBGene00047278	10.6509	4.63278e-06	4.26335e-05	4.45824	1.0089	0	148.941	118.4	0	0	0	0
21ur-4281	WBGene00050492	4.91841	0.160286	NA	0.24768	0	0	0	0	0	0	0	0
21ur-4287	WBGene00049877	5.11547	0.144101	NA	0.74304	0	0	0	0	0	0	0	0
21ur-4318	WBGene00045528	4.91841	0.160286	NA	0.24768	0	0	0	0	0	0	0	0
21ur-4345	WBGene00049405	5.02651	0.151245	NA	0	0.50445	0	0	0	0	0	0	0
21ur-4362	WBGene00048272	4.91841	0.160286	NA	0.24768	0	0	0	0	0	0	0	0
21ur-4363	WBGene00048925	5.11859	0.143856	NA	0.24768	0.50445	0	0	0	0	0	0	0
21ur-4379	WBGene00049165	5.34559	0.126828	NA	0.99072	0.50445	0	0	0	0	0	0	0
21ur-4385	WBGene00048676	4.91841	0.160286	NA	0.24768	0	0	0	0	0	0	0	0
21ur-4386	WBGene00050235	8.36435	0.0157907	0.0431271	0	0	0	0	0	60.691	0	0	0
21ur-4389	WBGene00050317	4.9204	0.160115	NA	0	0.252225	0	0	0	0	0	0	0
21ur-44	WBGene00048340	4.91841	0.160286	NA	0.24768	0	0	0	0	0	0	0	0
21ur-4404	WBGene00050547	4.91841	0.160286	NA	0.24768	0	0	0	0	0	0	0	0
21ur-4409	WBGene00045876	9.99292	3.43496e-06	3.2737e-05	1.2384	0.50445	0	52.85	35.5201	91.0365	0	0	0
21ur-4410	WBGene00046449	1.2842	0.702125	NA	0	0	0	0	0	0	0	0.934361	0
21ur-4430	WBGene00046475	4.91841	0.160286	NA	0.24768	0	0	0	0	0	0	0	0
21ur-4431	WBGene00049730	4.9204	0.160115	NA	0	0.252225	0	0	0	0	0	0	0
21ur-4445	WBGene00047312	4.9204	0.160115	NA	0	0.252225	0	0	0	0	0	0	0
21ur-4454	WBGene00046104	7.53605	0.0303197	0.0714685	0	0	0	28.8273	0	0	0	0	0
21ur-4456	WBGene00047565	5.50851	0.115608	NA	0	0	0	4.80455	0	0	0	0	0
21ur-4468	WBGene00048928	6.25997	0.0734806	0.135577	0	0	0	9.60909	0	0	0	0	0
21ur-4481	WBGene00047934	9.03439	0.00179247	0.0072239	0.49536	0.252225	0	86.4818	0	0	0	0	0
21ur-4514	WBGene00048549	4.91841	0.160286	NA	0.24768	0	0	0	0	0	0	0	0
21ur-4539	WBGene00046374	5.50851	0.115608	NA	0	0	0	4.80455	0	0	0	0	0
21ur-4541	WBGene00045941	4.91841	0.160286	NA	0.24768	0	0	0	0	0	0	0	0
21ur-4544	WBGene00049713	5.02477	0.151387	NA	0.24768	0.252225	0	0	0	0	0	0	0
21ur-4549	WBGene00046355	8.9678	0.00126068	0.00539172	0.74304	0.756675	0	81.6773	0	0	0	0	0
21ur-4558	WBGene00048706	5.50851	0.115608	0.185995	0	0	0	0	11.84	0	0	0	0
21ur-4572	WBGene00050653	5.6562	0.106128	NA	0.49536	0	0	4.80455	0	0	0	0	0
21ur-4577	WBGene00046257	4.91841	0.160286	NA	0.24768	0	0	0	0	0	0	0	0
21ur-4586	WBGene00047968	5.20413	0.137243	NA	0	1.0089	0	0	0	0	0	0	0
21ur-4588	WBGene00046436	8.20421	0.0180221	0.047793	0	0	0	0	23.6801	30.3455	0	0	0
21ur-4597	WBGene00050449	4.91841	0.160286	NA	0.24768	0	0	0	0	0	0	0	0
21ur-4617	WBGene00045641	5.27524	0.131928	NA	0.99072	0.252225	0	0	0	0	0	0	0
21ur-4627	WBGene00048888	9.01807	0.0090385	0.0275207	0	0	0	86.4818	0	0	0	0	0
21ur-4632	WBGene00047919	4.91841	0.160286	NA	0.24768	0	0	0	0	0	0	0	0
21ur-4656	WBGene00050509	6.25997	0.0734806	0.135577	0	0	0	9.60909	0	0	0	0	0
21ur-4658	WBGene00049015	5.02302	0.15153	NA	0.49536	0	0	0	0	0	0	0	0
21ur-4665	WBGene00049703	4.9204	0.160115	NA	0	0.252225	0	0	0	0	0	0	0
21ur-4688	WBGene00049410	4.91841	0.160286	NA	0.24768	0	0	0	0	0	0	0	0
21ur-4700	WBGene00047228	8.356	0.00457166	0.0157636	0.24768	0.50445	0	0	59.2002	0	0	0	0
21ur-471	WBGene00047447	-2.09824	NA	NA	0	0	0	0	0	0	0	0	10.0468
21ur-4729	WBGene00048128	5.50851	0.115608	0.185995	0	0	0	0	11.84	0	0	0	0
21ur-474	WBGene00048877	5.50851	0.115608	NA	0	0	0	4.80455	0	0	0	0	0
21ur-4748	WBGene00046758	5.02302	0.15153	NA	0.49536	0	0	0	0	0	0	0	0
21ur-4751	WBGene00046937	5.67583	0.104916	NA	1.73376	1.26112	0	0	0	0	0	0	0
21ur-4758	WBGene00047044	6.25997	0.0734806	0.135577	0	0	0	0	0	30.3455	0	0	0
21ur-4759	WBGene00046303	5.62908	0.107821	NA	1.48608	1.26112	0	0	0	0	0	0	0
21ur-4762	WBGene00049598	7.33036	0.0352562	0.0793878	0	0	0	24.0227	0	0	0	0	0
21ur-477	WBGene00047656	5.02651	0.151245	NA	0	0.50445	0	0	0	0	0	0	0
21ur-4770	WBGene00049995	4.91841	0.160286	NA	0.24768	0	0	0	0	0	0	0	0
21ur-4778	WBGene00050398	4.91841	0.160286	NA	0.24768	0	0	0	0	0	0	0	0
21ur-4786	WBGene00047093	5.50851	0.115608	NA	0	0	0	4.80455	0	0	0	0	0
21ur-4789	WBGene00049466	5.02651	0.151245	NA	0	0.50445	0	0	0	0	0	0	0
21ur-4791	WBGene00049948	4.91841	0.160286	NA	0.24768	0	0	0	0	0	0	0	0
21ur-4795	WBGene00046527	5.02477	0.151387	NA	0.24768	0.252225	0	0	0	0	0	0	0
21ur-4801	WBGene00047174	5.02651	0.151245	NA	0	0.50445	0	0	0	0	0	0	0
21ur-4808	WBGene00048321	4.91841	0.160286	NA	0.24768	0	0	0	0	0	0	0	0
21ur-4809	WBGene00048915	7.47281	0.0317692	0.0731605	0	0	0	0	35.5201	0	0	0	0
21ur-4816	WBGene00047957	6.47212	0.0458442	0.0973871	4.21056	1.0089	0	4.80455	0	0	0	0	0
21ur-4824	WBGene00046494	4.91841	0.160286	NA	0.24768	0	0	0	0	0	0	0	0
21ur-4826	WBGene00046808	6.94397	0.00990711	0.0296631	0.24768	0	0	4.80455	11.84	15.1728	0	0	0
21ur-4828	WBGene00047573	5.02477	0.151387	NA	0.24768	0.252225	0	0	0	0	0	0	0
21ur-484	WBGene00048195	4.91841	0.160286	NA	0.24768	0	0	0	0	0	0	0	0
21ur-4840	WBGene00047935	5.02477	0.151387	NA	0.24768	0.252225	0	0	0	0	0	0	0
21ur-4843	WBGene00050344	5.02477	0.151387	NA	0.24768	0.252225	0	0	0	0	0	0	0
21ur-4853	WBGene00048357	7.23818	0.0185603	0.048918	0.24768	0	0	14.4136	0	15.1728	0	0	0
21ur-4862	WBGene00050865	6.25997	0.0734806	0.135577	0	0	0	0	23.6801	0	0	0	0
21ur-4874	WBGene00047234	5.34439	0.126913	NA	1.2384	0.252225	0	0	0	0	0	0	0
21ur-4889	WBGene00049675	5.34678	0.126743	NA	0.74304	0.756675	0	0	0	0	0	0	0
21ur-4891	WBGene00047734	4.9204	0.160115	NA	0	0.252225	0	0	0	0	0	0	0
21ur-4892	WBGene00049270	5.02302	0.15153	NA	0.49536	0	0	0	0	0	0	0	0
21ur-4916	WBGene00047886	8.92622	0.000529032	0.00257781	0.24768	0	0	43.2409	11.84	30.3455	0	0	0
21ur-4921	WBGene00050032	5.20132	0.137457	NA	0.49536	0.50445	0	0	0	0	0	0	0
21ur-4931	WBGene00046384	5.02477	0.151387	NA	0.24768	0.252225	0	0	0	0	0	0	0
21ur-4935	WBGene00049334	4.9204	0.160115	NA	0	0.252225	0	0	0	0	0	0	0
21ur-494	WBGene00049919	6.25997	0.0734806	0.135577	0	0	0	0	0	30.3455	0	0	0
21ur-4946	WBGene00049959	5.78112	0.0986012	0.170915	0.74304	0.252225	0	4.80455	0	0	0	0	0
21ur-4948	WBGene00048407	5.02651	0.151245	NA	0	0.50445	0	0	0	0	0	0	0
21ur-4949	WBGene00047673	4.9204	0.160115	NA	0	0.252225	0	0	0	0	0	0	0
21ur-4973	WBGene00046143	8.33422	0.00404999	0.0142781	0.24768	1.0089	0	0	0	60.691	0	0	0
21ur-4977	WBGene00048190	6.25997	0.0734806	0.135577	0	0	0	0	23.6801	0	0	0	0
21ur-5	WBGene00048241	4.91841	0.160286	NA	0.24768	0	0	0	0	0	0	0	0
21ur-5005	WBGene00050498	8.97401	0.00146065	0.0061087	0.49536	1.26112	0	0	0	91.0365	0	0	0
21ur-5009	WBGene00048141	5.47513	0.117841	NA	0	2.0178	0	0	0	0	0	0	0
21ur-5027	WBGene00047788	5.65862	0.105978	0.180301	0	0.50445	0	0	11.84	0	0	0	0
21ur-5049	WBGene00048898	5.50851	0.115608	NA	0	0	0	4.80455	0	0	0	0	0
21ur-505	WBGene00046029	5.11703	0.143978	NA	0.49536	0.252225	0	0	0	0	0	0	0
21ur-5059	WBGene00046748	5.41278	0.122102	NA	0.49536	1.26112	0	0	0	0	0	0	0
21ur-5061	WBGene00048242	5.6562	0.106128	NA	0.49536	0	3.79898	0	0	0	0	0	0
21ur-5065	WBGene00050579	4.91841	0.160286	NA	0.24768	0	0	0	0	0	0	0	0
21ur-5067	WBGene00050188	5.20273	0.13735	NA	0.24768	0.756675	0	0	0	0	0	0	0
21ur-5070	WBGene00050243	5.12015	0.143733	NA	0	0.756675	0	0	0	0	0	0	0
21ur-5073	WBGene00045743	4.91841	0.160286	NA	0.24768	0	0	0	0	0	0	0	0
21ur-5098	WBGene00050658	1.65811	0.621975	NA	0.49536	0	0	0	0	0	0	0.840925	0
21ur-5099	WBGene00050022	5.02651	0.151245	NA	0	0.50445	0	0	0	0	0	0	0
21ur-5108	WBGene00050871	5.11703	0.143978	NA	0.49536	0.252225	0	0	0	0	0	0	0
21ur-5114	WBGene00050456	4.91841	0.160286	NA	0.24768	0	0	0	0	0	0	0	0
21ur-5134	WBGene00047823	4.91841	0.160286	NA	0.24768	0	0	0	0	0	0	0	0
21ur-5141	WBGene00049392	5.11703	0.143978	NA	0.49536	0.252225	0	0	0	0	0	0	0
21ur-5146	WBGene00045858	5.02302	0.15153	NA	0.49536	0	0	0	0	0	0	0	0
21ur-5149	WBGene00050040	4.9204	0.160115	NA	0	0.252225	0	0	0	0	0	0	0
21ur-5153	WBGene00045518	4.9204	0.160115	NA	0	0.252225	0	0	0	0	0	0	0
21ur-5166	WBGene00047037	5.02302	0.15153	NA	0.49536	0	0	0	0	0	0	0	0
21ur-517	WBGene00046624	5.12015	0.143733	NA	0	0.756675	0	0	0	0	0	0	0
21ur-5173	WBGene00047627	5.50851	0.115608	0.185995	0	0	0	0	11.84	0	0	0	0
21ur-5196	WBGene00047083	4.91841	0.160286	NA	0.24768	0	0	0	0	0	0	0	0
21ur-5205	WBGene00047970	6.76551	0.0525287	0.107633	0	0	0	14.4136	0	0	0	0	0
21ur-5223	WBGene00045694	5.41168	0.122178	NA	0.74304	1.0089	0	0	0	0	0	0	0
21ur-5231	WBGene00046025	5.76414	0.0995986	NA	1.73376	1.76557	0	0	0	0	0	0	0
21ur-525	WBGene00047396	5.3432	0.126998	NA	1.48608	0	0	0	0	0	0	0	0
21ur-5258	WBGene00046382	4.91841	0.160286	NA	0.24768	0	0	0	0	0	0	0	0
21ur-5268	WBGene00047832	7.47594	0.0129812	0.0370033	0	0.252225	0	9.60909	0	30.3455	0	0	0
21ur-5281	WBGene00047556	5.11859	0.143856	NA	0.24768	0.50445	0	0	0	0	0	0	0
21ur-5283	WBGene00047341	5.58596	0.110557	0.185159	0.24768	0	0	0	11.84	0	0	0	0
21ur-5303	WBGene00046049	5.27654	0.131833	NA	0.74304	0.50445	0	0	0	0	0	0	0
21ur-5312	WBGene00045683	7.49614	0.00849997	0.0261602	0.74304	0.756675	0	0	0	45.5183	0	0	0
21ur-5318	WBGene00049648	4.91841	0.160286	NA	0.24768	0	0	0	0	0	0	0	0
21ur-5324	WBGene00046522	5.27782	0.131738	NA	0.49536	0.756675	0	0	0	0	0	0	0
21ur-5328	WBGene00048929	8.85402	0.0100063	0.0299057	0	0.252225	0	76.8728	0	0	0	0	0
21ur-5338	WBGene00046406	5.02302	0.15153	NA	0.49536	0	0	0	0	0	0	0	0
21ur-534	WBGene00046832	4.91841	0.160286	NA	0.24768	0	0	0	0	0	0	0	0
21ur-5342	WBGene00046011	7.47281	0.0317692	0.0731605	0	0	0	0	35.5201	0	0	0	0
21ur-5353	WBGene00047537	5.02477	0.151387	NA	0.24768	0.252225	0	0	0	0	0	0	0
21ur-536	WBGene00050435	3.896	0.263985	NA	0	0.252225	0	0	0	0	0.108797	0	0
21ur-5363	WBGene00049538	5.58596	0.110557	NA	0.24768	0	0	4.80455	0	0	0	0	0
21ur-5364	WBGene00047012	5.20273	0.13735	NA	0.24768	0.756675	0	0	0	0	0	0	0
21ur-5375	WBGene00047867	7.50299	0.00669088	0.0215372	0.99072	2.77447	0	24.0227	0	0	0	0	0
21ur-5378	WBGene00049112	8.04559	0.0204948	0.0529449	0.49536	0	0	43.2409	0	0	0	0	0
21ur-5385	WBGene00045684	5.02477	0.151387	NA	0.24768	0.252225	0	0	0	0	0	0	0
21ur-540	WBGene00048336	4.91841	0.160286	NA	0.24768	0	0	0	0	0	0	0	0
21ur-5405	WBGene00050829	5.67418	0.105017	NA	2.22912	0.756675	0	0	0	0	0	0	0
21ur-5413	WBGene00045798	4.9204	0.160115	NA	0	0.252225	0	0	0	0	0	0	0
21ur-5415	WBGene00049679	6.37501	0.0682488	0.132473	0.49536	0	0	9.60909	0	0	0	0	0
21ur-5430	WBGene00047187	8.34281	0.00298314	0.0110562	1.48608	0.50445	0	0	0	60.691	0	0	0
21ur-5432	WBGene00047055	5.11703	0.143978	NA	0.49536	0.252225	0	0	0	0	0	0	0
21ur-5455	WBGene00172407	4.9204	0.160115	NA	0	0.252225	0	0	0	0	0	0	0
21ur-5469	WBGene00166008	4.91841	0.160286	NA	0.24768	0	0	0	0	0	0	0	0
21ur-5479	WBGene00167693	5.02477	0.151387	NA	0.24768	0.252225	0	0	0	0	0	0	0
21ur-5480	WBGene00170875	4.91841	0.160286	NA	0.24768	0	0	0	0	0	0	0	0
21ur-5482	WBGene00171647	5.58596	0.110557	0.185159	0.24768	0	0	0	11.84	0	0	0	0
21ur-5493	WBGene00169134	4.9204	0.160115	NA	0	0.252225	0	0	0	0	0	0	0
21ur-5496	WBGene00165236	7.17425	0.0157048	0.0430851	0.99072	0.756675	0	19.2182	0	0	0	0	0
21ur-5519	WBGene00168921	5.02651	0.151245	NA	0	0.50445	0	0	0	0	0	0	0
21ur-5520	WBGene00172380	5.11859	0.143856	NA	0.24768	0.50445	0	0	0	0	0	0	0
21ur-5533	WBGene00165017	4.91841	0.160286	NA	0.24768	0	0	0	0	0	0	0	0
21ur-5536	WBGene00169560	4.9204	0.160115	NA	0	0.252225	0	0	0	0	0	0	0
21ur-5545	WBGene00170411	6.37501	0.0682488	0.132473	0.49536	0	0	0	23.6801	0	0	0	0
21ur-555	WBGene00049902	4.91841	0.160286	NA	0.24768	0	0	0	0	0	0	0	0
21ur-5603	WBGene00167895	5.02302	0.15153	NA	0.49536	0	0	0	0	0	0	0	0
21ur-5622	WBGene00173994	5.50851	0.115608	0.185995	0	0	0	0	11.84	0	0	0	0
21ur-5629	WBGene00173941	4.91841	0.160286	NA	0.24768	0	0	0	0	0	0	0	0
21ur-563	WBGene00047685	7.47281	0.0317692	0.0731605	0	0	0	0	0	45.5183	0	0	0
21ur-5633	WBGene00174729	4.91841	0.160286	NA	0.24768	0	0	0	0	0	0	0	0
21ur-5637	WBGene00172677	5.11859	0.143856	NA	0.24768	0.50445	0	0	0	0	0	0	0
21ur-5639	WBGene00174021	5.02477	0.151387	NA	0.24768	0.252225	0	0	0	0	0	0	0
21ur-5652	WBGene00167574	9.42199	4.83e-05	0.000326311	0.99072	2.0178	0	24.0227	94.7204	0	0	0	0
21ur-5662	WBGene00167425	4.9204	0.160115	NA	0	0.252225	0	0	0	0	0	0	0
21ur-5678	WBGene00172754	6.76551	0.0525287	0.107633	0	0	0	14.4136	0	0	0	0	0
21ur-5691	WBGene00172546	5.20132	0.137457	NA	0.49536	0.50445	0	0	0	0	0	0	0
21ur-5696	WBGene00167324	8.09543	0.000667232	0.00315076	0.74304	0.756675	0	24.0227	23.6801	0	0	0	0
21ur-5706	WBGene00167264	5.41057	0.122255	NA	0.99072	0.756675	0	0	0	0	0	0	0
21ur-5716	WBGene00172695	5.02302	0.15153	NA	0.49536	0	0	0	0	0	0	0	0
21ur-5742	WBGene00166214	9.26822	0.000150195	0.000869237	0.99072	0.252225	0	57.6546	47.3602	0	0	0	0
21ur-5750	WBGene00170473	5.58596	0.110557	0.185159	0.24768	0	0	0	11.84	0	0	0	0
21ur-5772	WBGene00171084	5.19991	0.137564	NA	0.74304	0.252225	0	0	0	0	0	0	0
21ur-5803	WBGene00167952	4.9204	0.160115	NA	0	0.252225	0	0	0	0	0	0	0
21ur-5809	WBGene00169778	4.91841	0.160286	NA	0.24768	0	0	0	0	0	0	0	0
21ur-5816	WBGene00166364	5.11547	0.144101	NA	0.74304	0	0	0	0	0	0	0	0
21ur-582	WBGene00046912	5.11859	0.143856	NA	0.24768	0.50445	0	0	0	0	0	0	0
21ur-5828	WBGene00171936	5.11859	0.143856	NA	0.24768	0.50445	0	0	0	0	0	0	0
21ur-5836	WBGene00174405	8.56189	0.00344281	0.0124765	0	0	0	14.4136	23.6801	30.3455	0	0	0
21ur-5844	WBGene00166449	5.57976	0.110954	NA	1.2384	1.26112	0	0	0	0	0	0	0
21ur-5848	WBGene00168264	5.11703	0.143978	NA	0.49536	0.252225	0	0	0	0	0	0	0
21ur-5850	WBGene00171034	6.25997	0.0734806	0.135577	0	0	0	0	23.6801	0	0	0	0
21ur-5883	WBGene00166781	4.91841	0.160286	NA	0.24768	0	0	0	0	0	0	0	0
21ur-5896	WBGene00168666	9.30348	3.04942e-05	0.000220275	4.70592	1.51335	0	72.0682	0	30.3455	0	0	0
21ur-5898	WBGene00167512	7.53605	0.0303197	0.0714685	0	0	0	28.8273	0	0	0	0	0
21ur-5904	WBGene00172985	5.02477	0.151387	NA	0.24768	0.252225	0	0	0	0	0	0	0
21ur-5914	WBGene00170281	4.91841	0.160286	NA	0.24768	0	0	0	0	0	0	0	0
21ur-5929	WBGene00174409	6.80715	0.0028975	0.010778	1.73376	2.0178	0	0	11.84	15.1728	0	0	0
21ur-5937	WBGene00171308	6.25997	0.0734806	0.135577	0	0	0	9.60909	0	0	0	0	0
21ur-5943	WBGene00170429	5.58728	0.110472	NA	0	0.252225	3.79898	0	0	0	0	0	0
21ur-5956	WBGene00174821	5.52561	0.114478	NA	1.48608	0.756675	0	0	0	0	0	0	0
21ur-5975	WBGene00168282	5.58596	0.110557	0.185159	0.24768	0	0	0	11.84	0	0	0	0
21ur-5992	WBGene00171354	5.02477	0.151387	NA	0.24768	0.252225	0	0	0	0	0	0	0
21ur-6002	WBGene00172199	4.91841	0.160286	NA	0.24768	0	0	0	0	0	0	0	0
21ur-6004	WBGene00167665	5.94112	0.0895922	0.158488	0.24768	1.51335	0	4.80455	0	0	0	0	0
21ur-6006	WBGene00168843	5.19849	0.137672	NA	0.99072	0	0	0	0	0	0	0	0
21ur-6027	WBGene00170398	6.25997	0.0734806	0.135577	0	0	0	0	23.6801	0	0	0	0
21ur-6039	WBGene00167972	4.9204	0.160115	NA	0	0.252225	0	0	0	0	0	0	0
21ur-6059	WBGene00174067	10.5025	1.24133e-07	1.78372e-06	3.96288	2.77447	0	57.6546	71.0403	121.382	0	0	0
21ur-6076	WBGene00166751	5.50851	0.115608	0.185995	0	0	0	0	0	15.1728	0	0	0
21ur-6085	WBGene00170627	5.02651	0.151245	NA	0	0.50445	0	0	0	0	0	0	0
21ur-6089	WBGene00173902	5.02477	0.151387	NA	0.24768	0.252225	0	0	0	0	0	0	0
21ur-6090	WBGene00174072	5.11703	0.143978	NA	0.49536	0.252225	0	0	0	0	0	0	0
21ur-6098	WBGene00165950	5.12015	0.143733	NA	0	0.756675	0	0	0	0	0	0	0
21ur-61	WBGene00047920	5.19991	0.137564	NA	0.74304	0.252225	0	0	0	0	0	0	0
21ur-6101	WBGene00168815	7.34884	0.0199028	0.0517991	0.24768	0.252225	0	24.0227	0	0	0	0	0
21ur-6102	WBGene00165743	5.58596	0.110557	NA	0.24768	0	0	4.80455	0	0	0	0	0
21ur-6105	WBGene00166780	4.9204	0.160115	NA	0	0.252225	0	0	0	0	0	0	0
21ur-6112	WBGene00171330	5.19849	0.137672	NA	0.99072	0	0	0	0	0	0	0	0
21ur-6130	WBGene00173785	4.9204	0.160115	NA	0	0.252225	0	0	0	0	0	0	0
21ur-6139	WBGene00165144	5.6562	0.106128	0.180301	0.49536	0	0	0	11.84	0	0	0	0
21ur-6144	WBGene00170623	6.86724	0.0489709	0.102463	1.2384	0	0	14.4136	0	0	0	0	0
21ur-6169	WBGene00170546	4.9204	0.160115	NA	0	0.252225	0	0	0	0	0	0	0
21ur-6172	WBGene00169268	4.9204	0.160115	NA	0	0.252225	0	0	0	0	0	0	0
21ur-6190	WBGene00171080	4.91841	0.160286	NA	0.24768	0	0	0	0	0	0	0	0
21ur-6198	WBGene00165379	4.91841	0.160286	NA	0.24768	0	0	0	0	0	0	0	0
21ur-6215	WBGene00169425	5.02477	0.151387	NA	0.24768	0.252225	0	0	0	0	0	0	0
21ur-623	WBGene00047173	5.47205	0.118049	NA	0.74304	1.26112	0	0	0	0	0	0	0
21ur-6237	WBGene00168066	5.11703	0.143978	NA	0.49536	0.252225	0	0	0	0	0	0	0
21ur-6244	WBGene00170913	5.11703	0.143978	NA	0.49536	0.252225	0	0	0	0	0	0	0
21ur-6262	WBGene00168052	4.91841	0.160286	NA	0.24768	0	0	0	0	0	0	0	0
21ur-6265	WBGene00166237	6.41952	0.0325406	0.074601	0.74304	0.252225	0	0	23.6801	0	0	0	0
21ur-6267	WBGene00168931	4.9204	0.160115	NA	0	0.252225	0	0	0	0	0	0	0
21ur-6274	WBGene00172670	4.91841	0.160286	NA	0.24768	0	0	0	0	0	0	0	0
21ur-6279	WBGene00170450	5.11547	0.144101	NA	0.74304	0	0	0	0	0	0	0	0
21ur-6283	WBGene00167143	8.16183	0.00664696	0.0214219	0	0.252225	0	0	23.6801	30.3455	0	0	0
21ur-6284	WBGene00170100	5.20132	0.137457	NA	0.49536	0.50445	0	0	0	0	0	0	0
21ur-6290	WBGene00169832	5.83739	0.0953538	NA	0.74304	0.50445	3.79898	0	0	0	0	0	0
21ur-6302	WBGene00170488	4.9204	0.160115	NA	0	0.252225	0	0	0	0	0	0	0
21ur-6343	WBGene00167096	7.95137	0.00420872	0.014702	0.99072	1.0089	0	38.4364	0	0	0	0	0
21ur-6349	WBGene00166210	5.98605	0.0871852	0.15518	0.74304	1.26112	3.79898	0	0	0	0	0	0
21ur-6358	WBGene00171364	8.36435	0.0157907	0.0431271	0	0	0	0	0	60.691	0	0	0
21ur-6369	WBGene00166740	5.02302	0.15153	NA	0.49536	0	0	0	0	0	0	0	0
21ur-6371	WBGene00165410	5.57885	0.111013	NA	1.48608	1.0089	0	0	0	0	0	0	0
21ur-6385	WBGene00169126	8.02275	0.00623729	0.0203342	0.74304	0.252225	0	0	47.3602	0	0	0	0
21ur-6392	WBGene00166941	5.50851	0.115608	0.185995	0	0	0	0	11.84	0	0	0	0
21ur-64	WBGene00050001	5.50851	0.115608	NA	0	0	0	4.80455	0	0	0	0	0
21ur-640	WBGene00049846	6.37306	0.0360754	0.0808023	0.49536	0.252225	0	0	23.6801	0	0	0	0
21ur-6400	WBGene00174923	4.77922	0.151124	0.233631	0.24768	0	0	19.2182	0	0	0	0.373745	0
21ur-6402	WBGene00170748	6.81922	0.0373919	0.0830557	0.24768	0.50445	0	14.4136	0	0	0	0	0
21ur-6410	WBGene00169907	6.25997	0.0734806	0.135577	0	0	0	0	23.6801	0	0	0	0
21ur-6439	WBGene00172107	4.91841	0.160286	NA	0.24768	0	0	0	0	0	0	0	0
21ur-644	WBGene00048098	4.91841	0.160286	NA	0.24768	0	0	0	0	0	0	0	0
21ur-6442	WBGene00165903	8.18276	0.0183415	0.0484842	0	0.252225	0	48.0455	0	0	0	0	0
21ur-6444	WBGene00167306	5.19849	0.137672	NA	0.99072	0	0	0	0	0	0	0	0
21ur-6455	WBGene00170978	4.9204	0.160115	NA	0	0.252225	0	0	0	0	0	0	0
21ur-6485	WBGene00166849	5.50851	0.115608	NA	0	0	0	4.80455	0	0	0	0	0
21ur-6493	WBGene00166710	4.9204	0.160115	NA	0	0.252225	0	0	0	0	0	0	0
21ur-6497	WBGene00170417	4.91841	0.160286	NA	0.24768	0	0	0	0	0	0	0	0
21ur-6499	WBGene00174585	4.91841	0.160286	NA	0.24768	0	0	0	0	0	0	0	0
21ur-6502	WBGene00171094	5.02302	0.15153	NA	0.49536	0	0	0	0	0	0	0	0
21ur-6508	WBGene00166921	5.02651	0.151245	NA	0	0.50445	0	0	0	0	0	0	0
21ur-651	WBGene00049977	4.91841	0.160286	NA	0.24768	0	0	0	0	0	0	0	0
21ur-6527	WBGene00166185	5.11859	0.143856	NA	0.24768	0.50445	0	0	0	0	0	0	0
21ur-6534	WBGene00172106	5.50851	0.115608	0.185995	0	0	0	0	0	15.1728	0	0	0
21ur-6548	WBGene00165114	5.50851	0.115608	NA	0	0	0	4.80455	0	0	0	0	0
21ur-6564	WBGene00169610	7.54877	0.0300353	0.0711715	0	0.50445	0	0	35.5201	0	0	0	0
21ur-6580	WBGene00171991	5.02477	0.151387	NA	0.24768	0.252225	0	0	0	0	0	0	0
21ur-6593	WBGene00166125	4.9204	0.160115	NA	0	0.252225	0	0	0	0	0	0	0
21ur-6598	WBGene00169590	4.09573	0.0910427	0.160378	0.24768	0.252225	0	67.2637	0	75.8638	0	0	4.1573
21ur-660	WBGene00048404	4.91841	0.160286	NA	0.24768	0	0	0	0	0	0	0	0
21ur-6607	WBGene00170169	6.26249	0.0733628	0.135577	3.21984	4.0356	0	0	0	0	0	0	0
21ur-6610	WBGene00169410	5.02302	0.15153	NA	0.49536	0	0	0	0	0	0	0	0
21ur-6615	WBGene00167353	4.9204	0.160115	NA	0	0.252225	0	0	0	0	0	0	0
21ur-6617	WBGene00169920	5.02477	0.151387	NA	0.24768	0.252225	0	0	0	0	0	0	0
21ur-6620	WBGene00167039	5.02651	0.151245	NA	0	0.50445	0	0	0	0	0	0	0
21ur-664	WBGene00046785	6.72702	0.0031678	0.0116298	1.2384	2.52225	0	4.80455	0	15.1728	0	0	0
21ur-6645	WBGene00166932	6.25997	0.0734806	0.135577	0	0	0	9.60909	0	0	0	0	0
21ur-6647	WBGene00165848	5.02302	0.15153	NA	0.49536	0	0	0	0	0	0	0	0
21ur-665	WBGene00047357	6.25997	0.0734806	0.135577	0	0	0	9.60909	0	0	0	0	0
21ur-6662	WBGene00172787	4.9204	0.160115	NA	0	0.252225	0	0	0	0	0	0	0
21ur-6667	WBGene00173705	4.91841	0.160286	NA	0.24768	0	0	0	0	0	0	0	0
21ur-6674	WBGene00174570	5.11547	0.144101	NA	0.74304	0	0	0	0	0	0	0	0
21ur-6677	WBGene00168305	6.80822	0.0510093	0.105971	0	0.50445	0	14.4136	0	0	0	0	0
21ur-6685	WBGene00174143	7.55702	0.0298521	0.0708738	0.49536	0	0	28.8273	0	0	0	0	0
21ur-6695	WBGene00168979	5.72106	0.102165	NA	1.73376	1.51335	0	0	0	0	0	0	0
21ur-6703	WBGene00173758	4.9204	0.160115	NA	0	0.252225	0	0	0	0	0	0	0
21ur-6712	WBGene00172931	9.26505	7.43948e-05	0.000472891	1.2384	1.0089	0	33.6318	0	75.8638	0	0	0
21ur-6715	WBGene00174998	4.9204	0.160115	NA	0	0.252225	0	0	0	0	0	0	0
21ur-6716	WBGene00165544	8.43635	0.014871	0.0412364	0	0	0	57.6546	0	0	0	0	0
21ur-6756	WBGene00173643	4.91841	0.160286	NA	0.24768	0	0	0	0	0	0	0	0
21ur-6759	WBGene00167744	6.37501	0.0682488	0.132473	0.49536	0	0	0	0	30.3455	0	0	0
21ur-6763	WBGene00170566	6.28198	0.0495259	0.103472	0.24768	0	0	4.80455	0	15.1728	0	0	0
21ur-6774	WBGene00168380	7.47281	0.0317692	0.0731605	0	0	0	0	0	45.5183	0	0	0
21ur-6778	WBGene00171255	5.34796	0.126658	NA	0.49536	1.0089	0	0	0	0	0	0	0
21ur-6832	WBGene00173475	4.91841	0.160286	NA	0.24768	0	0	0	0	0	0	0	0
21ur-6836	WBGene00170771	5.20413	0.137243	NA	0	1.0089	0	0	0	0	0	0	0
21ur-6844	WBGene00170851	5.02477	0.151387	NA	0.24768	0.252225	0	0	0	0	0	0	0
21ur-6847	WBGene00167849	7.52826	0.0304951	0.0717713	0	0	0	19.2182	0	15.1728	0	0	0
21ur-6869	WBGene00172722	6.42762	0.065958	0.129398	0.74304	0	0	0	0	30.3455	0	0	0
21ur-6886	WBGene00167406	5.84028	0.0951894	0.1664	0	1.26112	0	0	0	15.1728	0	0	0
21ur-6887	WBGene00172036	4.9204	0.160115	NA	0	0.252225	0	0	0	0	0	0	0
21ur-6895	WBGene00166119	9.2294	0.007499	0.0236266	0	0	0	0	0	106.209	0	0	0
21ur-6898	WBGene00171559	6.32071	0.0706786	0.135577	0	0.252225	0	9.60909	0	0	0	0	0
21ur-6907	WBGene00171899	4.91841	0.160286	NA	0.24768	0	0	0	0	0	0	0	0
21ur-6917	WBGene00166323	6.19729	0.073009	0.135577	2.72448	0.50445	0	4.80455	0	0	0	0	0
21ur-6936	WBGene00174607	4.91841	0.160286	NA	0.24768	0	0	0	0	0	0	0	0
21ur-694	WBGene00048382	5.62648	0.107984	NA	2.22912	0.50445	0	0	0	0	0	0	0
21ur-6942	WBGene00174692	5.65741	0.106053	NA	0.24768	0.252225	3.79898	0	0	0	0	0	0
21ur-6946	WBGene00172232	4.9204	0.160115	NA	0	0.252225	0	0	0	0	0	0	0
21ur-6950	WBGene00169856	5.93771	0.089777	NA	1.2384	0.50445	3.79898	0	0	0	0	0	0
21ur-696	WBGene00049379	6.26711	0.0234705	0.058592	1.73376	2.0178	0	0	0	15.1728	0	0	0
21ur-6964	WBGene00166097	4.91841	0.160286	NA	0.24768	0	0	0	0	0	0	0	0
21ur-6967	WBGene00174022	5.50851	0.115608	0.185995	0	0	0	0	0	15.1728	0	0	0
21ur-6982	WBGene00170419	5.27654	0.131833	NA	0.74304	0.50445	0	0	0	0	0	0	0
21ur-699	WBGene00046531	5.34796	0.126658	NA	0.49536	1.0089	0	0	0	0	0	0	0
21ur-6995	WBGene00167620	5.6562	0.106128	NA	0.49536	0	3.79898	0	0	0	0	0	0
21ur-6999	WBGene00174003	9.6585	NA	NA	0.49536	0	0	134.527	0	0	0	0	0
21ur-7003	WBGene00165987	5.34439	0.126913	NA	1.2384	0.252225	0	0	0	0	0	0	0
21ur-7004	WBGene00170479	4.9204	0.160115	NA	0	0.252225	0	0	0	0	0	0	0
21ur-7010	WBGene00172176	5.7061	0.0778928	0.141598	0.24768	0.50445	0	0	11.84	0	0	0	0
21ur-7015	WBGene00172141	5.20413	0.137243	NA	0	1.0089	0	0	0	0	0	0	0
21ur-7024	WBGene00167664	5.11859	0.143856	NA	0.24768	0.50445	0	0	0	0	0	0	0
21ur-7026	WBGene00173483	5.02651	0.151245	NA	0	0.50445	0	0	0	0	0	0	0
21ur-7035	WBGene00166077	4.91841	0.160286	NA	0.24768	0	0	0	0	0	0	0	0
21ur-7039	WBGene00171389	5.02651	0.151245	NA	0	0.50445	0	0	0	0	0	0	0
21ur-7043	WBGene00172227	8.25477	7.82849e-05	0.000494241	5.20128	4.0356	0	28.8273	0	15.1728	0	0	0
21ur-7065	WBGene00172112	5.6562	0.106128	NA	0.49536	0	0	4.80455	0	0	0	0	0
21ur-7067	WBGene00170802	5.20413	0.137243	NA	0	1.0089	0	0	0	0	0	0	0
21ur-7072	WBGene00173095	6.55786	0.0194203	0.0508463	0.99072	0.756675	0	0	0	30.3455	0	0	0
21ur-7075	WBGene00174119	5.72059	0.102193	0.175357	0.74304	0	0	0	11.84	0	0	0	0
21ur-7085	WBGene00171048	5.50851	0.115608	NA	0	0	0	4.80455	0	0	0	0	0
21ur-7087	WBGene00172433	4.9204	0.160115	NA	0	0.252225	0	0	0	0	0	0	0
21ur-7133	WBGene00168324	4.91841	0.160286	NA	0.24768	0	0	0	0	0	0	0	0
21ur-7167	WBGene00171968	5.11547	0.144101	NA	0.74304	0	0	0	0	0	0	0	0
21ur-7170	WBGene00173729	5.52464	0.114542	NA	1.73376	0.50445	0	0	0	0	0	0	0
21ur-719	WBGene00045727	5.12015	0.143733	NA	0	0.756675	0	0	0	0	0	0	0
21ur-7191	WBGene00166150	5.35034	0.126489	NA	0	1.51335	0	0	0	0	0	0	0
21ur-7198	WBGene00173880	4.91841	0.160286	NA	0.24768	0	0	0	0	0	0	0	0
21ur-7199	WBGene00165738	8.96867	0.00214747	0.00841064	0	0.252225	0	14.4136	0	75.8638	0	0	0
21ur-7207	WBGene00167923	5.50851	0.115608	NA	0	0	0	4.80455	0	0	0	0	0
21ur-7211	WBGene00166123	5.50851	0.115608	0.185995	0	0	0	0	11.84	0	0	0	0
21ur-7218	WBGene00167453	5.02302	0.15153	NA	0.49536	0	0	0	0	0	0	0	0
21ur-722	WBGene00048930	4.9204	0.160115	NA	0	0.252225	0	0	0	0	0	0	0
21ur-7229	WBGene00165163	5.50851	0.115608	0.185995	0	0	0	0	0	15.1728	0	0	0
21ur-7234	WBGene00173775	4.91841	0.160286	NA	0.24768	0	0	0	0	0	0	0	0
21ur-7237	WBGene00172992	10.0923	8.53417e-07	9.68685e-06	2.22912	2.0178	0	19.2182	82.8803	91.0365	0	0	0
21ur-7239	WBGene00173805	6.31967	0.0707259	0.135577	0.24768	0	0	0	23.6801	0	0	0	0
21ur-7242	WBGene00166662	7.34302	0.0349334	0.0790434	0.24768	0	0	24.0227	0	0	0	0	0
21ur-7250	WBGene00167163	5.02302	0.15153	NA	0.49536	0	0	0	0	0	0	0	0
21ur-7259	WBGene00171116	6.87024	0.0488693	0.10229	0	0	0	9.60909	11.84	0	0	0	0
21ur-7267	WBGene00171128	5.02477	0.151387	NA	0.24768	0.252225	0	0	0	0	0	0	0
21ur-7278	WBGene00168309	5.62822	0.107875	NA	1.73376	1.0089	0	0	0	0	0	0	0
21ur-7293	WBGene00166589	5.11547	0.144101	NA	0.74304	0	0	0	0	0	0	0	0
21ur-7303	WBGene00168697	7.2863	0.0363996	0.0814309	0	0	3.79898	19.2182	0	0	0	0	0
21ur-7313	WBGene00167078	4.91841	0.160286	NA	0.24768	0	0	0	0	0	0	0	0
21ur-7325	WBGene00169112	4.9204	0.160115	NA	0	0.252225	0	0	0	0	0	0	0
21ur-7335	WBGene00174731	6.87024	0.0488693	0.10229	0	0	0	9.60909	11.84	0	0	0	0
21ur-7337	WBGene00173728	5.12015	0.143733	NA	0	0.756675	0	0	0	0	0	0	0
21ur-7339	WBGene00171905	5.20132	0.137457	NA	0.49536	0.50445	0	0	0	0	0	0	0
21ur-7346	WBGene00173292	5.02477	0.151387	NA	0.24768	0.252225	0	0	0	0	0	0	0
21ur-735	WBGene00050657	5.65741	0.106053	NA	0.24768	0.252225	0	4.80455	0	0	0	0	0
21ur-7357	WBGene00173937	4.91841	0.160286	NA	0.24768	0	0	0	0	0	0	0	0
21ur-7375	WBGene00174658	6.76551	0.0525287	0.107633	0	0	0	14.4136	0	0	0	0	0
21ur-7383	WBGene00168319	5.02302	0.15153	NA	0.49536	0	0	0	0	0	0	0	0
21ur-7386	WBGene00172741	8.82729	0.00920485	0.0279397	0	0	0	33.6318	0	45.5183	0	0	0
21ur-7394	WBGene00165575	5.50851	0.115608	NA	0	0	0	4.80455	0	0	0	0	0
21ur-7400	WBGene00173904	5.58728	0.110472	0.185159	0	0.252225	0	0	0	15.1728	0	0	0
21ur-7416	WBGene00167948	5.02477	0.151387	NA	0.24768	0.252225	0	0	0	0	0	0	0
21ur-7417	WBGene00172596	6.22722	0.0581576	0.116785	0.24768	0	3.79898	0	11.84	0	0	0	0
21ur-7419	WBGene00174052	4.91841	0.160286	NA	0.24768	0	0	0	0	0	0	0	0
21ur-7422	WBGene00170129	5.11547	0.144101	NA	0.74304	0	0	0	0	0	0	0	0
21ur-7423	WBGene00173315	4.9204	0.160115	NA	0	0.252225	0	0	0	0	0	0	0
21ur-7434	WBGene00165926	9.85068	5.99494e-06	5.3179e-05	1.48608	0.252225	0	67.2637	47.3602	45.5183	0	0	0
21ur-7439	WBGene00165722	5.11547	0.144101	NA	0.74304	0	0	0	0	0	0	0	0
21ur-7462	WBGene00167927	5.70495	0.0779532	0.141598	0.49536	0.252225	0	0	11.84	0	0	0	0
21ur-7466	WBGene00166088	6.76551	0.0525287	0.107633	0	0	0	14.4136	0	0	0	0	0
21ur-7494	WBGene00173250	5.88727	0.0925469	0.162412	1.48608	0	0	0	11.84	0	0	0	0
21ur-7511	WBGene00171230	5.02477	0.151387	NA	0.24768	0.252225	0	0	0	0	0	0	0
21ur-752	WBGene00045883	4.9204	0.160115	NA	0	0.252225	0	0	0	0	0	0	0
21ur-7520	WBGene00172661	5.11859	0.143856	NA	0.24768	0.50445	0	0	0	0	0	0	0
21ur-7522	WBGene00174013	5.50851	0.115608	NA	0	0	3.79898	0	0	0	0	0	0
21ur-753	WBGene00046458	5.02477	0.151387	NA	0.24768	0.252225	0	0	0	0	0	0	0
21ur-7532	WBGene00174636	6.31967	0.0707259	0.135577	0.24768	0	0	9.60909	0	0	0	0	0
21ur-7541	WBGene00165147	5.67418	0.105017	NA	2.22912	0.756675	0	0	0	0	0	0	0
21ur-7546	WBGene00174902	5.02302	0.15153	NA	0.49536	0	0	0	0	0	0	0	0
21ur-7548	WBGene00173493	8.42536	0.0146338	0.0407587	0	0	0	24.0227	35.5201	0	0	0	0
21ur-7558	WBGene00172376	5.02302	0.15153	NA	0.49536	0	0	0	0	0	0	0	0
21ur-7562	WBGene00165438	5.19991	0.137564	NA	0.74304	0.252225	0	0	0	0	0	0	0
21ur-7563	WBGene00171107	5.12015	0.143733	NA	0	0.756675	0	0	0	0	0	0	0
21ur-7573	WBGene00171842	7.54659	0.0300839	0.0711715	0.24768	0	0	28.8273	0	0	0	0	0
21ur-7575	WBGene00172538	4.9204	0.160115	NA	0	0.252225	0	0	0	0	0	0	0
21ur-7583	WBGene00171526	5.58728	0.110472	0.185159	0	0.252225	0	0	11.84	0	0	0	0
21ur-7586	WBGene00169929	4.9204	0.160115	NA	0	0.252225	0	0	0	0	0	0	0
21ur-7587	WBGene00174327	6.25997	0.0734806	0.135577	0	0	0	0	23.6801	0	0	0	0
21ur-7590	WBGene00169853	4.91841	0.160286	NA	0.24768	0	0	0	0	0	0	0	0
21ur-7597	WBGene00169741	5.02477	0.151387	NA	0.24768	0.252225	0	0	0	0	0	0	0
21ur-76	WBGene00046021	5.20132	0.137457	NA	0.49536	0.50445	0	0	0	0	0	0	0
21ur-7600	WBGene00172271	5.02302	0.15153	NA	0.49536	0	0	0	0	0	0	0	0
21ur-7615	WBGene00171587	4.9204	0.160115	NA	0	0.252225	0	0	0	0	0	0	0
21ur-7639	WBGene00172250	4.9204	0.160115	NA	0	0.252225	0	0	0	0	0	0	0
21ur-7686	WBGene00165523	7.58249	0.00958586	0.0288994	0.74304	0.50445	0	28.8273	0	0	0	0	0
21ur-7695	WBGene00167293	5.27395	0.132023	NA	1.2384	0	0	0	0	0	0	0	0
21ur-7705	WBGene00168647	4.91841	0.160286	NA	0.24768	0	0	0	0	0	0	0	0
21ur-7710	WBGene00173487	8.35861	0.00339422	0.0123256	0.24768	1.26112	0	52.85	0	0	0	0	0
21ur-7730	WBGene00174426	5.50851	0.115608	0.185995	0	0	0	0	11.84	0	0	0	0
21ur-7738	WBGene00172881	5.02477	0.151387	NA	0.24768	0.252225	0	0	0	0	0	0	0
21ur-7741	WBGene00174015	5.47102	0.118118	NA	0.99072	1.0089	0	0	0	0	0	0	0
21ur-7744	WBGene00166637	4.9204	0.160115	NA	0	0.252225	0	0	0	0	0	0	0
21ur-7760	WBGene00172784	5.27524	0.131928	NA	0.99072	0.252225	0	0	0	0	0	0	0
21ur-777	WBGene00049225	4.91841	0.160286	NA	0.24768	0	0	0	0	0	0	0	0
21ur-7772	WBGene00169005	5.88245	0.0928153	NA	1.73376	2.52225	0	0	0	0	0	0	0
21ur-778	WBGene00050809	4.9204	0.160115	NA	0	0.252225	0	0	0	0	0	0	0
21ur-7796	WBGene00171290	5.41057	0.122255	NA	0.99072	0.756675	0	0	0	0	0	0	0
21ur-7803	WBGene00169384	4.91841	0.160286	NA	0.24768	0	0	0	0	0	0	0	0
21ur-7804	WBGene00174938	5.02302	0.15153	NA	0.49536	0	0	0	0	0	0	0	0
21ur-7810	WBGene00167575	4.91841	0.160286	NA	0.24768	0	0	0	0	0	0	0	0
21ur-7819	WBGene00171410	5.02651	0.151245	NA	0	0.50445	0	0	0	0	0	0	0
21ur-7824	WBGene00169548	5.88818	0.0924965	0.162412	1.2384	0.252225	0	4.80455	0	0	0	0	0
21ur-7832	WBGene00171027	5.27654	0.131833	NA	0.74304	0.50445	0	0	0	0	0	0	0
21ur-7833	WBGene00165878	4.9204	0.160115	NA	0	0.252225	0	0	0	0	0	0	0
21ur-7848	WBGene00171754	5.02477	0.151387	NA	0.24768	0.252225	0	0	0	0	0	0	0
21ur-7850	WBGene00167299	5.02302	0.15153	NA	0.49536	0	0	0	0	0	0	0	0
21ur-7855	WBGene00166841	5.52658	0.114414	NA	1.2384	1.0089	0	0	0	0	0	0	0
21ur-7857	WBGene00167275	9.7658	5.09729e-05	0.000341993	1.98144	0.50445	0	120.114	23.6801	0	0	0	0
21ur-786	WBGene00048559	7.72952	0.00194975	0.00775407	1.2384	0.252225	3.79898	28.8273	0	0	0	0	0
21ur-7860	WBGene00172752	5.50851	0.115608	0.185995	0	0	0	0	0	15.1728	0	0	0
21ur-7867	WBGene00173687	4.91841	0.160286	NA	0.24768	0	0	0	0	0	0	0	0
21ur-7868	WBGene00165094	4.91841	0.160286	NA	0.24768	0	0	0	0	0	0	0	0
21ur-7871	WBGene00167183	5.11859	0.143856	NA	0.24768	0.50445	0	0	0	0	0	0	0
21ur-7883	WBGene00174445	5.19849	0.137672	NA	0.99072	0	0	0	0	0	0	0	0
21ur-7887	WBGene00172778	6.0486	0.0839217	NA	2.97216	2.52225	0	0	0	0	0	0	0
21ur-7888	WBGene00169848	8.88524	0.0101478	0.0302079	0	0	0	0	82.8803	0	0	0	0
21ur-7901	WBGene00168517	4.91841	0.160286	NA	0.24768	0	0	0	0	0	0	0	0
21ur-7907	WBGene00171069	5.69639	0.068417	0.132607	0.49536	0.252225	0	0	0	15.1728	0	0	0
21ur-7915	WBGene00173542	4.91841	0.160286	NA	0.24768	0	0	0	0	0	0	0	0
21ur-7918	WBGene00165149	5.50851	0.115608	0.185995	0	0	0	0	0	15.1728	0	0	0
21ur-7930	WBGene00165032	6.37501	0.0682488	0.132473	0.49536	0	0	0	0	30.3455	0	0	0
21ur-7932	WBGene00171400	4.91841	0.160286	NA	0.24768	0	0	0	0	0	0	0	0
21ur-795	WBGene00049662	4.91841	0.160286	NA	0.24768	0	0	0	0	0	0	0	0
21ur-7955	WBGene00169047	5.02651	0.151245	NA	0	0.50445	0	0	0	0	0	0	0
21ur-7962	WBGene00171699	5.47411	0.11791	NA	0.24768	1.76557	0	0	0	0	0	0	0
21ur-7967	WBGene00172963	5.41168	0.122178	NA	0.74304	1.0089	0	0	0	0	0	0	0
21ur-7981	WBGene00170399	6.31967	0.0707259	0.135577	0.24768	0	0	0	23.6801	0	0	0	0
21ur-7982	WBGene00172553	4.9204	0.160115	NA	0	0.252225	0	0	0	0	0	0	0
21ur-7999	WBGene00170174	5.20132	0.137457	NA	0.49536	0.50445	0	0	0	0	0	0	0
21ur-8016	WBGene00166092	10.4075	5.09271e-07	6.18761e-06	2.4768	1.0089	0	86.4818	71.0403	75.8638	0	0	0
21ur-8024	WBGene00173017	5.50851	0.115608	0.185995	0	0	0	0	0	15.1728	0	0	0
21ur-8052	WBGene00169074	6.76551	0.0525287	0.107633	0	0	0	14.4136	0	0	0	0	0
21ur-8054	WBGene00165594	4.91841	0.160286	NA	0.24768	0	0	0	0	0	0	0	0
21ur-8056	WBGene00165690	5.19991	0.137564	NA	0.74304	0.252225	0	0	0	0	0	0	0
21ur-8084	WBGene00167696	4.91841	0.160286	NA	0.24768	0	0	0	0	0	0	0	0
21ur-8095	WBGene00174631	4.91841	0.160286	NA	0.24768	0	0	0	0	0	0	0	0
21ur-8098	WBGene00165540	7.47281	0.0317692	0.0731605	0	0	0	0	35.5201	0	0	0	0
21ur-8107	WBGene00167556	7.53605	0.0303197	0.0714685	0	0	0	28.8273	0	0	0	0	0
21ur-8158	WBGene00173119	5.11547	0.144101	NA	0.74304	0	0	0	0	0	0	0	0
21ur-816	WBGene00046161	8.36435	0.0157907	0.0431271	0	0	0	0	0	60.691	0	0	0
21ur-8165	WBGene00173018	4.9204	0.160115	NA	0	0.252225	0	0	0	0	0	0	0
21ur-8178	WBGene00171537	5.7217	0.102126	0.175357	0.49536	0.252225	0	4.80455	0	0	0	0	0
21ur-8195	WBGene00174793	4.9204	0.160115	NA	0	0.252225	0	0	0	0	0	0	0
21ur-820	WBGene00047672	5.27911	0.131643	NA	0.24768	1.0089	0	0	0	0	0	0	0
21ur-8213	WBGene00171510	7.34048	0.00565586	0.0187384	3.7152	5.0445	0	14.4136	0	0	0	0	0
21ur-8220	WBGene00166514	5.5761	0.11119	NA	2.22912	0.252225	0	0	0	0	0	0	0
21ur-8231	WBGene00169747	4.9204	0.160115	NA	0	0.252225	0	0	0	0	0	0	0
21ur-8232	WBGene00165863	5.02302	0.15153	NA	0.49536	0	0	0	0	0	0	0	0
21ur-8244	WBGene00171518	8.03016	0.0207467	0.0532249	0	0	0	43.2409	0	0	0	0	0
21ur-8249	WBGene00166330	9.49773	0.000969786	0.00432623	0	0.252225	0	86.4818	35.5201	0	0	0	0
21ur-8250	WBGene00166711	5.50851	0.115608	0.185995	0	0	0	0	0	15.1728	0	0	0
21ur-8261	WBGene00170377	7.47281	0.0317692	0.0731605	0	0	0	0	35.5201	0	0	0	0
21ur-8272	WBGene00172256	4.91841	0.160286	NA	0.24768	0	0	0	0	0	0	0	0
21ur-8273	WBGene00165579	6.25997	0.0734806	0.135577	0	0	0	0	23.6801	0	0	0	0
21ur-8285	WBGene00170626	9.48089	1.80135e-06	1.86643e-05	12.8794	11.0979	0	19.2182	82.8803	0	0	0	0
21ur-8288	WBGene00172797	0.710717	0.831443	NA	0	0	0	0	0	0	0	1.40154	0
21ur-8289	WBGene00169751	5.27782	0.131738	NA	0.49536	0.756675	0	0	0	0	0	0	0
21ur-830	WBGene00048316	6.73471	0.0113507	0.033155	0.49536	0.50445	3.79898	9.60909	0	0	0	0	0
21ur-8305	WBGene00167907	4.91841	0.160286	NA	0.24768	0	0	0	0	0	0	0	0
21ur-8309	WBGene00165716	4.91841	0.160286	NA	0.24768	0	0	0	0	0	0	0	0
21ur-8313	WBGene00173006	4.91841	0.160286	NA	0.24768	0	0	0	0	0	0	0	0
21ur-8326	WBGene00168912	8.36435	0.0157907	0.0431271	0	0	0	0	0	60.691	0	0	0
21ur-8331	WBGene00168721	5.27911	0.131643	NA	0.24768	1.0089	0	0	0	0	0	0	0
21ur-8333	WBGene00167047	5.02302	0.15153	NA	0.49536	0	0	0	0	0	0	0	0
21ur-8337	WBGene00174086	4.91841	0.160286	NA	0.24768	0	0	0	0	0	0	0	0
21ur-8348	WBGene00174139	4.9204	0.160115	NA	0	0.252225	0	0	0	0	0	0	0
21ur-8350	WBGene00168255	6.46734	0.0271758	0.0656786	0.74304	0.50445	0	0	23.6801	0	0	0	0
21ur-8377	WBGene00173273	5.78112	0.0986012	0.170915	0.74304	0.252225	0	4.80455	0	0	0	0	0
21ur-8378	WBGene00167577	4.91841	0.160286	NA	0.24768	0	0	0	0	0	0	0	0
21ur-8380	WBGene00171125	5.02477	0.151387	NA	0.24768	0.252225	0	0	0	0	0	0	0
21ur-8382	WBGene00170007	4.91841	0.160286	NA	0.24768	0	0	0	0	0	0	0	0
21ur-8397	WBGene00171412	5.02651	0.151245	NA	0	0.50445	0	0	0	0	0	0	0
21ur-840	WBGene00050472	5.41057	0.122255	NA	0.99072	0.756675	0	0	0	0	0	0	0
21ur-8407	WBGene00165297	5.02302	0.15153	NA	0.49536	0	0	0	0	0	0	0	0
21ur-8411	WBGene00166632	9.97259	1.65012e-05	0.000128948	1.48608	2.52225	0	129.723	35.5201	0	0	0	0
21ur-8446	WBGene00166131	6.25997	0.0734806	0.135577	0	0	0	0	23.6801	0	0	0	0
21ur-8449	WBGene00174619	6.31967	0.0707259	0.135577	0.24768	0	0	0	0	30.3455	0	0	0
21ur-8451	WBGene00170582	5.58596	0.110557	NA	0.24768	0	3.79898	0	0	0	0	0	0
21ur-8456	WBGene00168396	4.91841	0.160286	NA	0.24768	0	0	0	0	0	0	0	0
21ur-8460	WBGene00168316	7.02379	0.00132562	0.00562533	1.73376	5.29672	3.79898	0	0	15.1728	0	0	0
21ur-8468	WBGene00172625	1.39117	0.679041	NA	0	0	0	0	0	0	0.870374	0	0
21ur-848	WBGene00048287	5.27524	0.131928	NA	0.99072	0.252225	0	0	0	0	0	0	0
21ur-8481	WBGene00171882	5.02477	0.151387	NA	0.24768	0.252225	0	0	0	0	0	0	0
21ur-8490	WBGene00174489	4.91841	0.160286	NA	0.24768	0	0	0	0	0	0	0	0
21ur-8503	WBGene00166281	4.9204	0.160115	NA	0	0.252225	0	0	0	0	0	0	0
21ur-8507	WBGene00166273	6.80357	0.0213724	0.0545702	2.22912	2.52225	0	9.60909	0	0	0	0	0
21ur-8509	WBGene00165204	5.50851	0.115608	0.185995	0	0	0	0	11.84	0	0	0	0
21ur-8518	WBGene00170921	5.11547	0.144101	NA	0.74304	0	0	0	0	0	0	0	0
21ur-8523	WBGene00166130	4.91841	0.160286	NA	0.24768	0	0	0	0	0	0	0	0
21ur-8526	WBGene00173500	4.91841	0.160286	NA	0.24768	0	0	0	0	0	0	0	0
21ur-8539	WBGene00169524	4.91841	0.160286	NA	0.24768	0	0	0	0	0	0	0	0
21ur-8555	WBGene00172863	8.43366	0.000394229	0.00200259	0.24768	2.27002	0	24.0227	35.5201	0	0	0	0
21ur-8583	WBGene00167374	4.9204	0.160115	NA	0	0.252225	0	0	0	0	0	0	0
21ur-863	WBGene00049680	5.58068	0.110896	NA	0.99072	1.51335	0	0	0	0	0	0	0
21ur-8634	WBGene00167715	4.91841	0.160286	NA	0.24768	0	0	0	0	0	0	0	0
21ur-8639	WBGene00165618	6.31967	0.0707259	0.135577	0.24768	0	0	9.60909	0	0	0	0	0
21ur-8655	WBGene00174208	5.02302	0.15153	NA	0.49536	0	0	0	0	0	0	0	0
21ur-8658	WBGene00171937	1.87584	0.416549	0.529371	0.24768	0	0	0	35.5201	15.1728	3.69909	2.0556	0
21ur-8661	WBGene00171001	5.20273	0.13735	NA	0.24768	0.756675	0	0	0	0	0	0	0
21ur-8662	WBGene00166811	5.11703	0.143978	NA	0.49536	0.252225	0	0	0	0	0	0	0
21ur-8664	WBGene00174713	9.74607	5.14532e-06	4.67074e-05	1.73376	0.50445	0	38.4364	23.6801	91.0365	0	0	0
21ur-8671	WBGene00174352	8.21829	0.003795	0.0135285	0.49536	0.756675	0	48.0455	0	0	0	0	0
21ur-8672	WBGene00167917	6.25997	0.0734806	0.135577	0	0	0	0	23.6801	0	0	0	0
21ur-8673	WBGene00167259	8.2147	0.0178677	0.0474195	0	0	0	38.4364	11.84	0	0	0	0
21ur-8677	WBGene00169677	4.9204	0.160115	NA	0	0.252225	0	0	0	0	0	0	0
21ur-8679	WBGene00168262	5.27395	0.132023	NA	1.2384	0	0	0	0	0	0	0	0
21ur-868	WBGene00046969	4.9204	0.160115	NA	0	0.252225	0	0	0	0	0	0	0
21ur-8690	WBGene00165974	4.91841	0.160286	NA	0.24768	0	0	0	0	0	0	0	0
21ur-8697	WBGene00167140	4.9204	0.160115	NA	0	0.252225	0	0	0	0	0	0	0
21ur-87	WBGene00049300	6.25997	0.0734806	0.135577	0	0	0	9.60909	0	0	0	0	0
21ur-870	WBGene00046896	5.02477	0.151387	NA	0.24768	0.252225	0	0	0	0	0	0	0
21ur-8702	WBGene00170725	4.91841	0.160286	NA	0.24768	0	0	0	0	0	0	0	0
21ur-8706	WBGene00172872	4.91841	0.160286	NA	0.24768	0	0	0	0	0	0	0	0
21ur-8730	WBGene00165129	4.9204	0.160115	NA	0	0.252225	0	0	0	0	0	0	0
21ur-8733	WBGene00172008	4.91841	0.160286	NA	0.24768	0	0	0	0	0	0	0	0
21ur-8734	WBGene00173518	5.02302	0.15153	NA	0.49536	0	0	0	0	0	0	0	0
21ur-8742	WBGene00173461	10.581	1.64072e-06	1.72336e-05	0.74304	0.50445	0	129.723	71.0403	60.691	0	0	0
21ur-8748	WBGene00166430	5.50851	0.115608	NA	0	0	0	4.80455	0	0	0	0	0
21ur-8757	WBGene00169780	4.91841	0.160286	NA	0.24768	0	0	0	0	0	0	0	0
21ur-8761	WBGene00171546	4.91841	0.160286	NA	0.24768	0	0	0	0	0	0	0	0
21ur-8767	WBGene00172296	6.98976	0.00715678	0.0227393	0.74304	0	0	4.80455	11.84	15.1728	0	0	0
21ur-8796	WBGene00170904	6.85401	0.029608	0.0704273	0.74304	0.50445	0	14.4136	0	0	0	0	0
21ur-8797	WBGene00173597	5.02477	0.151387	NA	0.24768	0.252225	0	0	0	0	0	0	0
21ur-8806	WBGene00169114	4.91841	0.160286	NA	0.24768	0	0	0	0	0	0	0	0
21ur-8824	WBGene00171376	8.06778	0.0073884	0.0233642	0.24768	0	0	33.6318	11.84	0	0	0	0
21ur-8826	WBGene00172198	4.9204	0.160115	NA	0	0.252225	0	0	0	0	0	0	0
21ur-8851	WBGene00170030	5.50851	0.115608	NA	0	0	0	4.80455	0	0	0	0	0
21ur-8854	WBGene00169967	5.50851	0.115608	0.185995	0	0	0	0	0	15.1728	0	0	0
21ur-8856	WBGene00168602	5.50851	0.115608	NA	0	0	0	4.80455	0	0	0	0	0
21ur-8869	WBGene00165631	4.9204	0.160115	NA	0	0.252225	0	0	0	0	0	0	0
21ur-8874	WBGene00170093	8.6462	0.00355708	0.0127954	0.24768	0	0	52.85	0	15.1728	0	0	0
21ur-8881	WBGene00173110	10.1328	1.3781e-05	0.000110186	0.24768	0.252225	0	124.918	35.5201	30.3455	0	0	0
21ur-8882	WBGene00168294	6.78671	0.0517696	0.107052	0.24768	0	0	14.4136	0	0	0	0	0
21ur-8884	WBGene00166469	4.91841	0.160286	NA	0.24768	0	0	0	0	0	0	0	0
21ur-8885	WBGene00172640	4.91841	0.160286	NA	0.24768	0	0	0	0	0	0	0	0
21ur-8888	WBGene00174355	5.88908	0.0924461	0.162369	0.99072	0.50445	0	4.80455	0	0	0	0	0
21ur-8898	WBGene00171414	5.11703	0.143978	NA	0.49536	0.252225	0	0	0	0	0	0	0
21ur-8899	WBGene00166946	8.31155	0.0164973	0.0445396	0	0	0	52.85	0	0	0	0	0
21ur-8927	WBGene00168581	4.91841	0.160286	NA	0.24768	0	0	0	0	0	0	0	0
21ur-8930	WBGene00172099	4.91841	0.160286	NA	0.24768	0	0	0	0	0	0	0	0
21ur-8940	WBGene00171424	4.91841	0.160286	NA	0.24768	0	0	0	0	0	0	0	0
21ur-8944	WBGene00174056	5.11703	0.143978	NA	0.49536	0.252225	0	0	0	0	0	0	0
21ur-8951	WBGene00173317	5.40947	0.122332	NA	1.2384	0.50445	0	0	0	0	0	0	0
21ur-8954	WBGene00169591	8.05292	0.0203761	0.0527483	0.49536	0	0	0	47.3602	0	0	0	0
21ur-8963	WBGene00165404	5.02651	0.151245	NA	0	0.50445	0	0	0	0	0	0	0
21ur-897	WBGene00046703	5.02477	0.151387	NA	0.24768	0.252225	0	0	0	0	0	0	0
21ur-8972	WBGene00174655	4.9204	0.160115	NA	0	0.252225	0	0	0	0	0	0	0
21ur-898	WBGene00049414	4.91841	0.160286	NA	0.24768	0	0	0	0	0	0	0	0
21ur-8985	WBGene00168034	5.02651	0.151245	NA	0	0.50445	0	0	0	0	0	0	0
21ur-8989	WBGene00165136	4.9204	0.160115	NA	0	0.252225	0	0	0	0	0	0	0
21ur-899	WBGene00048784	5.27524	0.131928	NA	0.99072	0.252225	0	0	0	0	0	0	0
21ur-8992	WBGene00171197	4.9204	0.160115	NA	0	0.252225	0	0	0	0	0	0	0
21ur-9021	WBGene00166164	9.23189	0.000156229	0.000898085	0.49536	0.756675	0	76.8728	23.6801	0	0	0	0
21ur-9025	WBGene00172774	7.87992	0.023347	0.0583497	0	0	0	38.4364	0	0	0	0	0
21ur-9026	WBGene00168373	7.92282	0.00170952	0.00694057	0.24768	0.756675	0	28.8273	11.84	0	0	0	0
21ur-9029	WBGene00170389	5.27654	0.131833	NA	0.74304	0.50445	0	0	0	0	0	0	0
21ur-9036	WBGene00174314	5.11859	0.143856	NA	0.24768	0.50445	0	0	0	0	0	0	0
21ur-9046	WBGene00168239	5.02651	0.151245	NA	0	0.50445	0	0	0	0	0	0	0
21ur-9052	WBGene00165486	9.20608	0.00170185	0.00691733	0.49536	0.252225	0	0	0	106.209	0	0	0
21ur-9061	WBGene00173160	5.58596	0.110557	NA	0.24768	0	0	4.80455	0	0	0	0	0
21ur-9076	WBGene00168985	5.02302	0.15153	NA	0.49536	0	0	0	0	0	0	0	0
21ur-9079	WBGene00165477	6.01821	0.085495	NA	2.4768	2.77447	0	0	0	0	0	0	0
21ur-9080	WBGene00165308	5.50851	0.115608	0.185995	0	0	0	0	11.84	0	0	0	0
21ur-9091	WBGene00166308	6.25997	0.0734806	0.135577	0	0	0	0	0	30.3455	0	0	0
21ur-9097	WBGene00168610	6.80747	0.0510356	0.105984	0.49536	0	0	14.4136	0	0	0	0	0
21ur-9103	WBGene00167207	5.19991	0.137564	NA	0.74304	0.252225	0	0	0	0	0	0	0
21ur-9134	WBGene00167091	9.89479	3.52177e-06	3.34897e-05	0.99072	1.0089	0	28.8273	35.5201	106.209	0	0	0
21ur-9135	WBGene00168541	5.50851	0.115608	0.185995	0	0	0	0	0	15.1728	0	0	0
21ur-9145	WBGene00167260	10.8205	0.000140719	0.000822856	0.49536	0	0	221.009	82.8803	0	0	0	0
21ur-9155	WBGene00169189	4.9204	0.160115	NA	0	0.252225	0	0	0	0	0	0	0
21ur-9163	WBGene00165266	5.02477	0.151387	NA	0.24768	0.252225	0	0	0	0	0	0	0
21ur-9164	WBGene00170856	5.88908	0.0924461	0.162369	0.99072	0.50445	0	4.80455	0	0	0	0	0
21ur-918	WBGene00048235	9.09779	0.00161422	0.0066368	0.24768	0	0	57.6546	35.5201	0	0	0	0
21ur-919	WBGene00046061	5.27654	0.131833	NA	0.74304	0.50445	0	0	0	0	0	0	0
21ur-9203	WBGene00166387	5.02302	0.15153	NA	0.49536	0	0	0	0	0	0	0	0
21ur-9205	WBGene00173769	6.33897	0.0439341	0.094039	0	1.0089	3.79898	0	11.84	0	0	0	0
21ur-9212	WBGene00173443	6.87024	0.0488693	0.10229	0	0	0	9.60909	0	15.1728	0	0	0
21ur-9220	WBGene00171706	5.20132	0.137457	NA	0.49536	0.50445	0	0	0	0	0	0	0
21ur-9238	WBGene00174508	5.58596	0.110557	NA	0.24768	0	0	4.80455	0	0	0	0	0
21ur-9253	WBGene00174703	4.91841	0.160286	NA	0.24768	0	0	0	0	0	0	0	0
21ur-9266	WBGene00168426	7.08133	0.0421496	0.0912729	0	0	0	19.2182	0	0	0	0	0
21ur-9278	WBGene00174222	8.0182	0.00169843	0.00690868	0.24768	0.756675	0	0	35.5201	15.1728	0	0	0
21ur-9306	WBGene00166025	7.08133	0.0421496	0.0912729	0	0	0	19.2182	0	0	0	0	0
21ur-9315	WBGene00171112	5.02477	0.151387	NA	0.24768	0.252225	0	0	0	0	0	0	0
21ur-9319	WBGene00166603	7.54747	0.0300642	0.0711715	0.49536	0	0	0	35.5201	0	0	0	0
21ur-9322	WBGene00169917	5.78422	0.0984203	0.170911	0	1.0089	0	4.80455	0	0	0	0	0
21ur-9328	WBGene00170509	4.9204	0.160115	NA	0	0.252225	0	0	0	0	0	0	0
21ur-9330	WBGene00169131	4.91841	0.160286	NA	0.24768	0	0	0	0	0	0	0	0
21ur-9336	WBGene00165734	5.72027	0.102212	NA	1.98144	1.26112	0	0	0	0	0	0	0
21ur-9340	WBGene00172692	8.74372	0.000212824	0.00117938	2.4768	1.0089	0	4.80455	71.0403	0	0	0	0
21ur-9360	WBGene00172012	5.90218	0.00401703	0.0141829	0.24768	0.252225	0	14.4136	23.6801	45.5183	0	0.560617	0
21ur-9362	WBGene00171791	5.12015	0.143733	NA	0	0.756675	0	0	0	0	0	0	0
21ur-9389	WBGene00170619	4.91841	0.160286	NA	0.24768	0	0	0	0	0	0	0	0
21ur-940	WBGene00047951	4.91841	0.160286	NA	0.24768	0	0	0	0	0	0	0	0
21ur-9402	WBGene00175005	7.39706	0.000874744	0.00396274	1.73376	2.0178	0	14.4136	0	15.1728	0	0	0
21ur-9410	WBGene00171416	4.91841	0.160286	NA	0.24768	0	0	0	0	0	0	0	0
21ur-9417	WBGene00170482	4.9204	0.160115	NA	0	0.252225	0	0	0	0	0	0	0
21ur-9428	WBGene00169570	4.9204	0.160115	NA	0	0.252225	0	0	0	0	0	0	0
21ur-9446	WBGene00167291	5.19991	0.137564	NA	0.74304	0.252225	0	0	0	0	0	0	0
21ur-9458	WBGene00169040	4.91841	0.160286	NA	0.24768	0	0	0	0	0	0	0	0
21ur-9461	WBGene00170297	6.87024	0.0488693	0.10229	0	0	0	9.60909	11.84	0	0	0	0
21ur-9463	WBGene00169699	4.91841	0.160286	NA	0.24768	0	0	0	0	0	0	0	0
21ur-9474	WBGene00167803	4.91841	0.160286	NA	0.24768	0	0	0	0	0	0	0	0
21ur-9498	WBGene00167156	5.02477	0.151387	NA	0.24768	0.252225	0	0	0	0	0	0	0
21ur-950	WBGene00049456	5.34796	0.126658	NA	0.49536	1.0089	0	0	0	0	0	0	0
21ur-9503	WBGene00165249	5.83835	0.0952989	NA	0.49536	0.756675	3.79898	0	0	0	0	0	0
21ur-9506	WBGene00168272	10.3071	3.77642e-08	6.20109e-07	11.3933	8.82787	3.79898	120.114	71.0403	0	0	0	0
21ur-952	WBGene00050847	5.34678	0.126743	NA	0.74304	0.756675	0	0	0	0	0	0	0
21ur-953	WBGene00047323	5.02302	0.15153	NA	0.49536	0	0	0	0	0	0	0	0
21ur-9531	WBGene00166421	5.11547	0.144101	NA	0.74304	0	0	0	0	0	0	0	0
21ur-9546	WBGene00167921	5.50851	0.115608	NA	0	0	0	4.80455	0	0	0	0	0
21ur-9548	WBGene00170966	7.47281	0.0317692	0.0731605	0	0	0	0	35.5201	0	0	0	0
21ur-9559	WBGene00173070	8.6463	0.00355668	0.0127954	0	0.252225	0	52.85	0	15.1728	0	0	0
21ur-9568	WBGene00167710	5.63254	0.107604	NA	0.49536	2.27002	0	0	0	0	0	0	0
21ur-9578	WBGene00169357	4.9204	0.160115	NA	0	0.252225	0	0	0	0	0	0	0
21ur-9579	WBGene00170721	4.91841	0.160286	NA	0.24768	0	0	0	0	0	0	0	0
21ur-9586	WBGene00166582	4.91841	0.160286	NA	0.24768	0	0	0	0	0	0	0	0
21ur-9589	WBGene00165026	5.50851	0.115608	0.185995	0	0	0	0	0	15.1728	0	0	0
21ur-9593	WBGene00174739	9.04762	0.00139027	0.00586246	1.2384	0.252225	0	86.4818	0	0	0	0	0
21ur-9601	WBGene00172154	5.02302	0.15153	NA	0.49536	0	0	0	0	0	0	0	0
21ur-9621	WBGene00171349	5.11547	0.144101	NA	0.74304	0	0	0	0	0	0	0	0
21ur-9632	WBGene00165623	5.02477	0.151387	NA	0.24768	0.252225	0	0	0	0	0	0	0
21ur-9639	WBGene00167142	4.91841	0.160286	NA	0.24768	0	0	0	0	0	0	0	0
21ur-9643	WBGene00169019	7.51334	0.0308335	0.0722138	0	0	0	9.60909	0	30.3455	0	0	0
21ur-965	WBGene00049129	4.91841	0.160286	NA	0.24768	0	0	0	0	0	0	0	0
21ur-9655	WBGene00169318	6.31967	0.0707259	0.135577	0.24768	0	0	0	0	30.3455	0	0	0
21ur-9664	WBGene00170503	4.9204	0.160115	NA	0	0.252225	0	0	0	0	0	0	0
21ur-967	WBGene00047688	8.36026	0.00414495	0.0145195	0.74304	0.252225	0	0	59.2002	0	0	0	0
21ur-9686	WBGene00167065	7.88867	0.023188	0.0581301	0.24768	0	0	38.4364	0	0	0	0	0
21ur-9688	WBGene00174614	7.43539	0.0125883	0.036056	0.49536	0.252225	0	0	0	45.5183	0	0	0
21ur-97	WBGene00046482	5.65862	0.105978	NA	0	0.50445	0	4.80455	0	0	0	0	0
21ur-9706	WBGene00167422	5.02302	0.15153	NA	0.49536	0	0	0	0	0	0	0	0
21ur-971	WBGene00046097	5.11703	0.143978	NA	0.49536	0.252225	0	0	0	0	0	0	0
21ur-9716	WBGene00168504	9.37291	0.00121845	0.00524333	0.99072	0	0	0	11.84	106.209	0	0	0
21ur-9718	WBGene00169708	5.27654	0.131833	NA	0.74304	0.50445	0	0	0	0	0	0	0
21ur-9719	WBGene00170306	8.75579	0.00058594	0.00281725	0.24768	0.50445	0	0	35.5201	45.5183	0	0	0
21ur-9741	WBGene00165563	9.6855	2.2342e-05	0.000167789	0.49536	0.252225	0	19.2182	23.6801	106.209	0	0	0
21ur-9762	WBGene00171571	6.78671	0.0517696	0.107052	0.24768	0	0	14.4136	0	0	0	0	0
21ur-9776	WBGene00168996	5.40947	0.122332	NA	1.2384	0.50445	0	0	0	0	0	0	0
21ur-9783	WBGene00170946	4.91841	0.160286	NA	0.24768	0	0	0	0	0	0	0	0
21ur-9804	WBGene00170614	4.9204	0.160115	NA	0	0.252225	0	0	0	0	0	0	0
21ur-9812	WBGene00166610	8.31155	0.0164973	0.0445396	0	0	0	52.85	0	0	0	0	0
21ur-9823	WBGene00171981	8.08838	0.00466191	0.0160235	1.48608	0.252225	0	43.2409	0	0	0	0	0
21ur-9833	WBGene00170591	7.47281	0.0317692	0.0731605	0	0	0	0	0	45.5183	0	0	0
21ur-9835	WBGene00172280	5.02651	0.151245	NA	0	0.50445	0	0	0	0	0	0	0
21ur-9837	WBGene00168402	4.91841	0.160286	NA	0.24768	0	0	0	0	0	0	0	0
21ur-9840	WBGene00169278	4.91841	0.160286	NA	0.24768	0	0	0	0	0	0	0	0
21ur-9846	WBGene00166479	5.02302	0.15153	NA	0.49536	0	0	0	0	0	0	0	0
21ur-9855	WBGene00167854	4.91841	0.160286	NA	0.24768	0	0	0	0	0	0	0	0
21ur-9856	WBGene00173574	5.02477	0.151387	NA	0.24768	0.252225	0	0	0	0	0	0	0
21ur-9860	WBGene00166029	5.50851	0.115608	0.185995	0	0	0	0	11.84	0	0	0	0
21ur-987	WBGene00047567	4.9204	0.160115	NA	0	0.252225	0	0	0	0	0	0	0
21ur-9870	WBGene00171169	4.9204	0.160115	NA	0	0.252225	0	0	0	0	0	0	0
21ur-9876	WBGene00171415	4.9204	0.160115	NA	0	0.252225	0	0	0	0	0	0	0
21ur-9901	WBGene00170959	5.02651	0.151245	NA	0	0.50445	0	0	0	0	0	0	0
21ur-9904	WBGene00167035	5.11547	0.144101	NA	0.74304	0	0	0	0	0	0	0	0
21ur-9910	WBGene00165310	5.02477	0.151387	NA	0.24768	0.252225	0	0	0	0	0	0	0
21ur-9924	WBGene00168548	5.02477	0.151387	NA	0.24768	0.252225	0	0	0	0	0	0	0
21ur-9929	WBGene00167850	4.91841	0.160286	NA	0.24768	0	0	0	0	0	0	0	0
21ur-9930	WBGene00165392	5.19991	0.137564	NA	0.74304	0.252225	0	0	0	0	0	0	0
21ur-9938	WBGene00171193	4.91841	0.160286	NA	0.24768	0	0	0	0	0	0	0	0
21ur-9939	WBGene00167358	5.02477	0.151387	NA	0.24768	0.252225	0	0	0	0	0	0	0
21ur-9941	WBGene00170940	5.50851	0.115608	0.185995	0	0	0	0	0	15.1728	0	0	0
21ur-9951	WBGene00166361	5.02477	0.151387	NA	0.24768	0.252225	0	0	0	0	0	0	0
21ur-9953	WBGene00168121	5.72393	0.101993	0.175357	0	0.756675	0	0	11.84	0	0	0	0
21ur-9960	WBGene00169973	5.27654	0.131833	NA	0.74304	0.50445	0	0	0	0	0	0	0
21ur-9962	WBGene00168502	5.02477	0.151387	NA	0.24768	0.252225	0	0	0	0	0	0	0
21ur-9975	WBGene00168871	7.4068	0.0107783	0.0317955	0.74304	1.0089	0	24.0227	0	0	0	0	0
21ur-9996	WBGene00174283	4.91841	0.160286	NA	0.24768	0	0	0	0	0	0	0	0
2L52.1	WBGene00007063	1.26904	0.5187	0.622614	41.8579	32.0326	15.1959	0	0	0	0	18.8741	1.03933
2RSSE.1	WBGene00007064	0.810398	0.340816	0.454223	315.049	301.157	159.557	72.0682	11.84	45.5183	89.6486	99.9767	77.2566
2RSSE.3	WBGene00044951	4.91841	0.160286	NA	0.24768	0	0	0	0	0	0	0	0
2RSSE.4	WBGene00195865	7.34575	0.0027984	0.0104584	1.2384	0.50445	0	0	11.84	30.3455	0	0	0
2RSSE.8	WBGene00201913	6.42341	0.0507843	0.105606	3.7152	1.76557	3.79898	0	0	0	0	0	0
3R5.2	WBGene00007066	5.20273	0.13735	NA	0.24768	0.756675	0	0	0	0	0	0	0
4R79.2	WBGene00007067	1.35436	0.31763	0.429856	31.9507	27.7447	3.79898	4.80455	0	0	0.543984	5.4193	10.0468
aagr-1	WBGene00017071	0.250953	0.847788	0.890752	14.6131	15.1335	7.59796	595.764	35.5201	15.1728	99.5491	95.9589	92.8465
aagr-2	WBGene00019895	-4.00957	0.000198354	0.00110549	2.4768	2.77447	18.9949	14.4136	106.56	60.691	545.507	422.051	469.429
aagr-3	WBGene00009583	-2.09503	0.00231904	0.0089749	289.29	302.67	205.145	81.6773	35.5201	91.0365	948.055	615.464	658.933
aagr-4	WBGene00018682	-5.87839	4.89762e-16	3.57643e-14	11.641	5.54895	22.7939	4.80455	35.5201	15.1728	1001.15	440.084	885.506
aak-1	WBGene00019801	-1.29732	0.0125792	0.0360468	38.6381	32.0326	41.7888	76.8728	94.7204	60.691	155.362	121.187	111.554
aak-2	WBGene00020142	1.086	0.0513664	0.106553	448.796	599.539	379.898	172.964	177.601	182.073	135.017	163.98	172.875
aakb-1	WBGene00010115	-0.918452	0.367359	0.48182	101.796	120.816	56.9847	4.80455	0	15.1728	113.584	92.0346	98.3895
aakb-2	WBGene00012928	-1.59085	0.0379188	0.0839328	30.2169	37.8337	34.1908	14.4136	0	0	68.8684	61.2941	82.7996
aakg-1	WBGene00013732	1.28805	0.08174	0.147227	734.123	797.283	581.244	182.573	142.081	106.209	152.316	201.075	174.953
aakg-2	WBGene00020633	0.806362	0.142364	0.222078	145.14	200.267	113.969	96.0909	59.2002	60.691	94.218	58.3042	50.927
aakg-3	WBGene00021527	1.55408	0.263489	0.3698	72.3225	49.6883	18.9949	4.80455	0	45.5183	22.8473	10.5583	0
aakg-4	WBGene00020135	-1.15108	0.101336	0.174784	46.3161	36.0682	30.3919	14.4136	11.84	0	56.3567	63.3497	63.7453
aakg-5	WBGene00011276	0.028249	0.971576	0.979727	138.948	129.896	94.9746	33.6318	35.5201	0	63.5373	92.3149	71.3671
aap-1	WBGene00000001	0.397087	0.608486	0.699691	92.6323	90.2965	75.9796	43.2409	11.84	0	32.5302	48.4934	49.8877
aars-1	WBGene00000196	-1.23827	0.212836	0.309996	41.1149	36.8248	15.1959	4.80455	0	0	36.1205	35.3189	68.942
aars-2	WBGene00000197	-0.364238	0.345676	0.459327	197.649	226.246	243.135	288.273	378.882	212.419	378.83	369.727	232.463
aat-1	WBGene00000002	-1.04424	0.374593	0.488916	56.9664	54.2284	37.9898	0	0	0	78.4425	46.8115	46.4232
aat-2	WBGene00000003	-0.467418	0.52331	0.626777	76.5331	77.6853	49.3868	14.4136	71.0403	0	93.674	54.7536	64.4382
aat-3	WBGene00000004	1.80599	0.000457798	0.00227845	237.525	265.341	174.753	168.159	82.8803	75.8638	54.3984	42.8872	53.0056
aat-4	WBGene00000005	-3.41746	0.0123771	0.0356229	5.44896	2.0178	0	0	0	0	26.6552	23.4525	29.794
aat-5	WBGene00000006	-0.153294	0.828983	0.876807	76.0377	66.0829	98.7735	62.4591	35.5201	0	38.4053	50.7358	112.94
aat-6	WBGene00000007	-0.65917	0.648546	0.732799	0.74304	0.252225	3.79898	4.80455	59.2002	30.3455	5.87503	16.1645	42.2659
aat-7	WBGene00000008	3.6903	0.289187	NA	0	0	0	0	0	0	0	0	0.346442
aat-8	WBGene00000009	1.81213	0.324413	0.436989	0.99072	2.0178	0	9.60909	71.0403	0	8.26856	2.3359	0
aat-9	WBGene00000010	-0.920208	0.242162	0.344891	23.5296	25.7269	72.1807	62.4591	11.84	0	56.9007	37.281	103.24
abce-1	WBGene00012714	-2.47477	0.0330685	0.0755914	41.1149	38.086	91.1756	0	0	0	185.934	202.85	123.333
abcf-1	WBGene00006512	-2.80549	0.00786915	0.0245614	97.5859	95.0888	113.969	0	35.5201	0	325.52	368.045	560.197
abcf-2	WBGene00012097	-1.12104	0.221758	0.32085	586.754	722.372	809.183	192.182	106.56	15.1728	809.883	908.48	955.141
abcf-3	WBGene00018339	-1.23193	0.121825	0.19468	78.7622	91.5577	189.949	9.60909	35.5201	30.3455	174.51	202.289	155.206
abch-1	WBGene00016973	-0.589	0.74949	0.814056	1.98144	1.0089	3.79898	4.80455	0	0	7.07179	0	4.50375
abcx-1	WBGene00006522	-0.0677666	NA	NA	1.98144	1.76557	0	0	11.84	0	6.7454	0	0
abf-1	WBGene00000012	4.62673	0.0656601	0.129017	1.98144	0	0	57.6546	11.84	0	0	1.40154	0
abf-2	WBGene00000013	-2.28719	0.181149	0.271761	0	2.27002	0	0	11.84	0	14.3612	5.51273	5.19663
abf-4	WBGene00000015	5.02302	0.15153	NA	0.49536	0	0	0	0	0	0	0	0
abf-5	WBGene00000016	0.577569	0.694052	0.769546	1.2384	1.0089	0	28.8273	47.3602	45.5183	22.9561	12.5204	1.03933
abf-6	WBGene00000017	-1.96696	0.0575891	0.115959	2.4768	1.26112	11.3969	19.2182	23.6801	0	32.639	32.7027	29.4476
abi-1	WBGene00015146	-0.245517	0.612129	0.702597	67.6166	59.0206	98.7735	81.6773	94.7204	15.1728	73.873	107.638	71.3671
abl-1	WBGene00000018	1.81257	0.0213816	0.054579	329.91	318.56	129.165	38.4364	35.5201	136.555	62.667	43.0741	38.4551
abt-1	WBGene00000019	-3.57607	0.00203446	0.00803272	0.24768	2.52225	3.79898	0	11.84	0	30.0279	19.6216	30.1405
abt-2	WBGene00000020	1.71792	0.0923801	0.162314	359.879	357.907	182.351	4.80455	118.4	30.3455	88.2342	46.7181	28.0618
abt-3	WBGene00000021	8.71563	0.00355674	0.0127954	0	0.252225	3.79898	0	71.0403	0	0	0	0
abt-4	WBGene00000022	-2.22882	0.00414136	0.0145141	12.6317	19.6735	15.1959	81.6773	23.6801	0	117.501	124.924	122.64
abt-5	WBGene00000023	0.222898	0.866387	0.904392	7.67808	8.0712	11.3969	9.60909	11.84	15.1728	0	12.427	13.5112
abtm-1	WBGene00022281	0.527041	0.321826	0.434183	76.2854	93.3232	79.7786	43.2409	71.0403	30.3455	29.8103	48.3065	66.1704
abts-1	WBGene00009920	1.586	0.00162067	0.00666077	1105.89	975.858	539.455	442.018	355.201	743.465	307.569	202.383	187.772
abts-2	WBGene00009929	0.334589	0.738368	0.805574	8.6688	10.8457	3.79898	38.4364	106.56	60.691	14.1436	43.0741	23.2116
abts-3	WBGene00019018	3.25384	1.32284e-05	0.000106525	1401.87	1491.91	676.219	528.5	213.121	166.9	83.6647	79.3273	73.7922
abts-4	WBGene00019844	-0.355214	0.543521	0.645097	69.1027	78.442	68.3817	38.4364	224.961	60.691	110.32	119.879	99.7753
abu-1	WBGene00000024	-5.92488	4.74158e-08	7.60501e-07	1.48608	1.0089	0	0	0	0	83.3384	86.8956	67.9026
abu-10	WBGene00000033	-1.53849	0.142243	0.221929	3.46752	10.089	11.3969	33.6318	153.921	45.5183	134.582	61.9482	141.695
abu-11	WBGene00000034	-3.00355	0.000316289	0.00165582	5.94432	13.6201	7.59796	24.0227	59.2002	60.691	198.663	120.72	235.234
abu-12	WBGene00004127	-5.02054	4.67396e-12	1.68641e-10	7.92576	3.53115	0	4.80455	11.84	0	190.177	136.604	162.828
abu-13	WBGene00004133	-6.23455	8.41424e-19	8.45217e-17	5.20128	8.32342	7.59796	4.80455	0	0	578.581	335.81	441.714
abu-14	WBGene00004174	-3.78312	1.26708e-13	6.23228e-12	30.2169	36.8248	41.7888	48.0455	35.5201	0	604.366	322.822	500.262
abu-15	WBGene00004099	-5.03415	0.000113102	0.00067918	3.46752	0.252225	0	0	0	30.3455	105.207	76.8045	86.6105
abu-2	WBGene00000025	4.47772	0.0929968	0.163095	0.24768	0	0	38.4364	11.84	0	1.08797	0	0
abu-3	WBGene00000026	9.1923	0.000250913	0.00135296	0.49536	0	0	28.8273	59.2002	15.1728	0	0	0
abu-4	WBGene00000027	-3.85852	0.13774	0.215982	0.24768	0	0	0	0	0	30.7895	4.57837	0
abu-6	WBGene00000029	-5.75483	2.86562e-06	2.78489e-05	1.48608	0.50445	0	0	0	0	108.906	39.8972	40.5337
abu-8	WBGene00000031	-3.9105	3.22962e-08	5.41543e-07	18.8237	29.2581	18.9949	0	11.84	15.1728	354.134	216.772	221.723
AC3.12	WBGene00077503	0.797989	0.795025	0.850137	0	0	0	62.4591	0	0	0	3.27027	14.897
AC3.13	WBGene00077504	0.808564	0.808813	NA	0	0	0	0	0	0	0	1.30811	0
AC3.14	WBGene00195634	8.06718	0.0201468	0.0522624	0	0	0	33.6318	11.84	0	0	0	0
AC3.15	WBGene00199275	7.47281	0.0317692	0.0731605	0	0	0	0	35.5201	0	0	0	0
AC3.16	WBGene00200016	0.856957	0.79697	NA	0.24768	0.756675	0	0	0	0	0	1.68185	0
AC3.5	WBGene00007071	-5.89024	1.81413e-14	1.02685e-12	7.18272	3.78337	15.1959	0	0	0	337.161	247.512	413.652
AC7.3	WBGene00014997	-2.01086	0.104186	0.178063	1.98144	0.756675	0	9.60909	0	0	7.72457	11.2123	9.00749
AC8.2	WBGene00007074	2.48295	0.467194	NA	0	0	0	0	0	0	0	0.373745	0
AC8.5	WBGene00007077	0.936821	0.778644	NA	0.49536	0.50445	0	0	0	0	0	1.58841	0
acbp-1	WBGene00016655	-5.995	9.95827e-08	1.47247e-06	37.6473	51.7061	91.1756	0	0	0	1801.89	2497.74	1944.23
acbp-3	WBGene00009818	-5.84158	9.97206e-12	3.44225e-10	2.4768	3.27892	0	0	23.6801	0	223.033	153.983	167.678
acbp-4	WBGene00018949	0.172323	0.932666	0.953265	0.74304	0	0	43.2409	0	0	7.18059	3.64401	9.00749
acbp-5	WBGene00011731	-0.241622	0.712421	0.784466	20.3097	12.1068	34.1908	62.4591	23.6801	30.3455	36.3381	34.7582	31.5262
acbp-6	WBGene00012457	0.272091	0.79774	0.852229	16.5946	6.30562	11.3969	9.60909	23.6801	0	2.39353	22.6115	3.11798
acbp-7	WBGene00044603	0.302229	NA	NA	1.48608	0.50445	0	0	0	0	0	2.98996	0
acc-1	WBGene00010275	2.71035	0.0464338	0.0983368	58.7001	43.8871	26.5929	72.0682	0	106.209	0.217594	22.6115	0.346442
acc-2	WBGene00008280	1.2006	0.186706	0.278556	18.0806	23.4569	7.59796	0	23.6801	15.1728	5.76623	3.55057	10.3933
acc-3	WBGene00018880	1.59172	0.136206	0.213986	34.1798	29.5103	11.3969	4.80455	0	0	5.22225	3.83088	7.27528
acc-4	WBGene00012099	1.314	0.245812	0.348975	201.859	183.872	113.969	9.60909	11.84	0	35.359	17.2857	56.4701
acd-1	WBGene00016064	-1.48207	0.654158	0.737426	0	0	0	0	0	0	5.00465	1.49498	0
acd-2	WBGene00016066	-3.52791	0.00835795	0.0258271	0.74304	0.252225	3.79898	0	11.84	0	28.2872	6.63397	24.5974
acd-3	WBGene00007775	1.09533	0.470995	0.580375	1.98144	1.26112	7.59796	110.505	0	0	14.0348	6.16679	8.66105
acd-4	WBGene00017879	8.5694	0.002477	0.00946222	0.74304	0	0	19.2182	47.3602	0	0	0	0
acd-5	WBGene00020903	-2.57569	0.190888	0.283844	0.24768	0	0	0	23.6801	15.1728	28.5048	32.5158	0.692884
acdh-1	WBGene00016943	-8.63411	3.04082e-24	5.37698e-22	11.641	12.8635	53.1858	0	0	15.1728	6748.99	6650.97	6005.57
acdh-10	WBGene00020366	-4.54279	2.46595e-08	4.26528e-07	25.0157	28.5014	15.1959	4.80455	0	0	333.245	408.97	382.472
acdh-11	WBGene00012860	-1.97027	0.0136092	0.0384197	11.1456	12.1068	22.7939	76.8728	59.2002	91.0365	179.188	172.763	125.758
acdh-12	WBGene00017125	-2.58475	0.00355977	0.0127996	37.6473	30.0148	106.372	19.2182	0	0	209.978	190.143	233.155
acdh-13	WBGene00001566	-1.61865	0.131728	0.20807	15.3562	19.6735	53.1858	0	0	0	60.1646	47.1853	46.0768
acdh-2	WBGene00015894	-4.38342	0.0110544	0.0324337	0	0.252225	3.79898	0	59.2002	0	222.816	134.361	184.307
acdh-3	WBGene00019433	-1.81991	0.0113658	0.0331718	69.3504	72.3886	113.969	62.4591	11.84	0	169.941	256.202	206.133
acdh-4	WBGene00020419	-2.97826	0.00618978	0.0202008	4.9536	1.0089	7.59796	0	0	0	29.4839	22.0509	22.5187
acdh-5	WBGene00016491	-4.00062	0.00274348	0.0102819	0.24768	0.50445	0	4.80455	11.84	0	40.3636	23.7328	13.5112
acdh-6	WBGene00015335	-4.18132	8.59373e-05	0.000536694	3.46752	2.27002	0	4.80455	11.84	45.5183	123.811	92.8755	145.852
acdh-7	WBGene00020812	-3.94144	2.2762e-06	2.28111e-05	30.4646	34.0504	41.7888	0	11.84	0	389.71	359.823	300.019
acdh-8	WBGene00019406	-1.76043	0.00674815	0.0216759	10.8979	15.8902	15.1959	38.4364	11.84	0	45.1507	55.0339	65.1311
acdh-9	WBGene00017874	-2.69882	2.84975e-06	2.77656e-05	39.8765	31.0237	83.5776	38.4364	82.8803	0	302.02	299.93	298.287
ace-1	WBGene00000035	0.745144	0.443994	0.55596	11.641	9.33232	3.79898	67.2637	47.3602	15.1728	23.6089	13.6417	5.88951
ace-2	WBGene00000036	0.51587	0.31564	0.427948	160.249	154.362	72.1807	129.723	47.3602	91.0365	97.9171	62.5088	79.3352
ace-3	WBGene00000037	2.18986	0.0197337	0.0514845	263.779	313.011	148.16	19.2182	71.0403	45.5183	63.3197	8.783	24.5974
ace-4	WBGene00000038	5.91341	8.64531e-06	7.35487e-05	69.8457	82.7298	34.1908	201.791	59.2002	15.1728	0	3.73745	0
acin-1	WBGene00016601	-3.5797	1.12945e-07	1.64392e-06	74.0563	55.9939	87.3766	28.8273	47.3602	0	372.955	519.225	998.792
acl-1	WBGene00010339	-1.72764	0.00129746	0.00552977	18.3283	22.9525	15.1959	14.4136	35.5201	15.1728	76.9193	71.0115	47.809
acl-11	WBGene00017888	-1.00099	0.282407	0.391379	14.1178	10.8457	15.1959	48.0455	0	0	12.0764	36.7204	47.809
acl-12	WBGene00015295	-1.26131	0.24088	0.343317	78.5145	63.8129	26.5929	0	0	15.1728	89.431	68.3953	84.5319
acl-13	WBGene00008581	1.98508	0.162049	0.247905	0.99072	1.0089	7.59796	48.0455	296.001	151.728	26.0024	21.5837	13.8577
acl-14	WBGene00019465	0.852733	0.114157	0.185995	142.168	106.943	94.9746	288.273	319.681	166.9	115.76	79.2339	107.743
acl-2	WBGene00011543	-0.112649	0.924386	0.947185	7.4304	5.54895	22.7939	206.596	414.402	60.691	135.126	118.29	125.758
acl-3	WBGene00006491	-2.51615	0.00487102	0.0166247	7.92576	11.3501	18.9949	0	0	0	43.4099	48.2131	49.8877
acl-4	WBGene00018657	-0.0986638	0.900757	0.930504	93.3753	79.7031	53.1858	14.4136	11.84	15.1728	64.0813	60.3598	33.2584
acl-5	WBGene00011106	-1.9229	0.0168333	0.0452241	9.9072	9.83677	7.59796	19.2182	0	0	42.7571	17.8463	46.0768
acl-6	WBGene00017261	-0.510045	0.515961	0.620511	23.2819	21.6913	72.1807	24.0227	47.3602	0	45.5859	72.5064	18.3614
acl-7	WBGene00012911	-2.78851	0.00408591	0.0143597	3.46752	4.0356	11.3969	14.4136	23.6801	75.8638	74.6346	137.538	136.498
acl-8	WBGene00020264	0.0892512	0.890261	0.9222	49.0406	59.5251	18.9949	120.114	82.8803	15.1728	56.5743	52.6046	55.0843
acl-9	WBGene00022646	-2.71802	2.48685e-05	0.000184432	27.2448	18.9169	18.9949	0	35.5201	15.1728	134.473	113.058	136.152
acly-1	WBGene00206384	5.40725	0.122485	NA	1.73376	0	0	0	0	0	0	0	0
acly-2	WBGene00007150	-0.591617	0.425514	0.537974	42.3533	56.2462	269.728	105.7	71.0403	30.3455	155.906	97.9211	186.039
acn-1	WBGene00000039	-3.97798	0.0010826	0.00473978	13.3747	9.58455	3.79898	0	23.6801	182.073	674.975	347.115	584.448
aco-1	WBGene00000040	-2.87084	0.000185517	0.00104345	113.437	122.834	94.9746	24.0227	35.5201	0	440.083	567.251	533.867
aco-2	WBGene00000041	-1.3401	0.117343	0.188334	729.665	795.517	828.178	216.205	23.6801	227.591	1073.39	1134.31	1395.47
acox-1	WBGene00008564	-4.14274	0.000849029	0.00386425	2.4768	1.0089	30.3919	0	0	0	141.653	65.3119	113.979
acp-1	WBGene00022770	-0.356656	0.723854	0.794072	2.4768	3.78337	7.59796	43.2409	23.6801	30.3455	15.6667	22.4247	22.8652
acp-2	WBGene00008802	-3.17465	0.0015437	0.00639353	17.0899	8.32342	7.59796	0	0	0	65.4957	58.7713	86.6105
acp-3	WBGene00008801	-3.3437	0.0655664	0.128856	0	0.252225	0	0	0	0	7.50698	8.96987	5.88951
acp-4	WBGene00008804	-2.60867	0.429717	0.541826	0	0	0	0	0	0	8.05096	6.16679	0
acp-5	WBGene00017427	-0.571304	0.740569	0.807112	0.49536	0	0	43.2409	130.241	15.1728	59.6206	47.559	26.3296
acp-6	WBGene00022245	-0.338188	0.787548	0.844752	501.056	433.07	1200.48	48.0455	23.6801	0	508.299	380.379	514.813
acp-7	WBGene00022246	0.224406	0.840396	0.885494	4.70592	4.54005	18.9949	38.4364	0	0	16.5371	9.06331	4.1573
acr-10	WBGene00000049	3.90853	0.0758393	0.139117	2.22912	0.50445	0	4.80455	59.2002	0	1.95834	0	0
acr-11	WBGene00000050	3.69567	0.160132	0.245537	0.49536	0.252225	0	48.0455	0	0	0	1.86872	0
acr-12	WBGene00000051	1.88656	0.0202982	0.0525979	115.419	89.2876	34.1908	48.0455	23.6801	0	20.6714	15.0432	10.0468
acr-14	WBGene00000053	0.970238	0.549883	0.650627	18.0806	16.6468	7.59796	4.80455	0	0	0	5.13899	9.00749
acr-15	WBGene00000054	-0.234994	0.828791	0.876757	56.7187	47.9227	15.1959	4.80455	0	0	35.9029	15.1367	34.2978
acr-16	WBGene00000055	3.98665	0.000179479	0.00101243	48.0499	31.7803	37.9898	221.009	47.3602	121.382	7.83337	7.7552	0
acr-17	WBGene00000056	0.184471	0.873129	0.908808	22.2912	22.448	34.1908	0	0	0	17.2987	6.16679	16.9757
acr-18	WBGene00000057	1.61749	0.00858701	0.0263787	57.4617	59.5251	41.7888	9.60909	35.5201	45.5183	12.294	14.2957	15.9363
acr-19	WBGene00000058	2.66889	0.076419	0.139606	61.1769	65.5785	22.7939	4.80455	0	0	0.108797	1.40154	11.779
acr-2	WBGene00000042	2.17051	0.0503102	0.104773	69.8457	68.8574	26.5929	33.6318	11.84	45.5183	17.6251	11.4926	0
acr-20	WBGene00000059	3.7784	0.00010114	0.000618108	71.8272	87.7743	60.7837	273.859	272.321	136.555	22.9561	8.96987	0.346442
acr-21	WBGene00000060	2.76847	0.000206476	0.00114806	51.2697	51.4539	15.1959	91.2864	71.0403	0	5.54864	8.68956	6.92884
acr-23	WBGene00000062	3.40951	0.00788463	0.0246025	43.344	30.267	7.59796	24.0227	23.6801	0	0	2.42934	4.1573
acr-24	WBGene00013534	0.987122	0.331552	0.44459	100.063	81.7209	15.1959	4.80455	47.3602	0	16.9723	15.3235	34.9906
acr-25	WBGene00043066	1.78713	0.51172	0.616866	0	0.50445	0	24.0227	0	15.1728	0	5.23242	0
acr-3	WBGene00000043	-0.408799	0.684647	0.761684	10.6502	9.83677	3.79898	0	0	30.3455	6.41901	8.59613	18.015
acr-5	WBGene00000044	2.00784	0.0938887	0.16447	54.2419	42.626	11.3969	0	47.3602	0	9.46532	1.21467	9.70038
acr-6	WBGene00000045	7.12785	3.06421e-05	0.000221102	6.192	4.28782	3.79898	4.80455	35.5201	0	0.108797	0	0
acr-7	WBGene00000046	4.96175	0.00152059	0.00631616	16.8422	10.3412	3.79898	538.109	390.722	257.937	0	5.32586	14.2041
acr-8	WBGene00000047	1.06642	0.411661	0.525061	10.8979	11.8546	3.79898	0	0	91.0365	2.61112	10.3714	10.7397
acr-9	WBGene00000048	3.76673	0.000477924	0.00236815	34.1798	36.8248	37.9898	24.0227	11.84	45.5183	0	4.29806	2.77154
acs-1	WBGene00018488	0.102829	0.762673	0.824358	204.584	189.421	277.326	297.882	296.001	257.937	252.844	243.027	199.897
acs-10	WBGene00007082	0.78411	0.491326	0.598929	8.91648	5.80117	15.1959	115.309	319.681	136.555	63.1021	59.5188	45.3839
acs-11	WBGene00018269	-2.84906	0.0026566	0.00999833	10.4026	3.53115	18.9949	0	35.5201	0	93.5653	89.5118	36.03
acs-12	WBGene00009106	-0.724852	0.427153	0.539524	11.1456	8.32342	26.5929	0	11.84	0	15.014	24.0131	12.8184
acs-13	WBGene00022037	-0.117533	0.867617	0.905009	221.921	239.361	417.888	67.2637	47.3602	121.382	261.33	193.039	163.174
acs-14	WBGene00008669	-6.57042	1.93074e-10	5.22252e-09	0.74304	0.50445	0	0	0	0	84.5351	115.3	57.8558
acs-15	WBGene00019920	-1.70816	0.581142	0.677353	0	0	7.59796	0	0	0	0	10.278	9.35394
acs-16	WBGene00018579	2.85876	0.00129767	0.00552977	316.783	374.554	664.822	52.85	47.3602	75.8638	32.3127	48.7737	25.9832
acs-17	WBGene00016716	-5.22231	2.63529e-11	8.40307e-10	3.96288	3.0267	7.59796	0	11.84	15.1728	221.293	125.391	165.599
acs-18	WBGene00011173	-1.28384	0.419778	0.53259	0.24768	1.76557	3.79898	0	0	75.8638	15.3403	35.3189	25.2903
acs-19	WBGene00007969	0.0263	0.97641	0.983304	658.333	761.467	558.45	48.0455	59.2002	166.9	373.064	425.041	320.459
acs-2	WBGene00009221	-3.84917	2.86611e-06	2.78489e-05	30.2169	32.0326	94.9746	9.60909	0	15.1728	422.349	634.805	358.568
acs-20	WBGene00009218	-4.83865	6.33885e-09	1.23746e-07	7.67808	4.0356	0	14.4136	11.84	30.3455	318.666	140.715	246.32
acs-21	WBGene00016849	4.26872	0.0414223	0.0903438	20.8051	21.6913	11.3969	0	0	0	0	1.49498	0
acs-22	WBGene00017012	-1.74058	0.0216075	0.055044	17.0899	21.6913	15.1959	76.8728	71.0403	121.382	154.818	156.692	170.103
acs-3	WBGene00020343	-3.19193	0.000391343	0.00198888	2.22912	2.77447	11.3969	4.80455	0	0	21.7594	50.3621	32.2191
acs-4	WBGene00018152	0.258777	0.815907	0.866876	647.683	660.577	566.048	120.114	35.5201	0	313.226	310.769	233.155
acs-5	WBGene00013575	-3.74316	9.67235e-06	8.15726e-05	2.72448	4.54005	26.5929	9.60909	11.84	15.1728	172.117	115.113	108.09
acs-6	WBGene00022849	-3.87601	0.000864371	0.00392239	0.49536	1.76557	3.79898	0	0	0	8.92134	35.0386	25.6367
acs-7	WBGene00007228	0.289651	0.826914	0.875345	1.98144	1.76557	7.59796	187.377	71.0403	15.1728	22.6297	30.6471	61.6667
acs-9	WBGene00020634	6.45222	4.58748e-06	4.22712e-05	11.641	6.0534	7.59796	62.4591	71.0403	106.209	0	1.30811	0
act-1	WBGene00000063	-4.04789	0.000105307	0.000640101	157.277	246.676	281.125	4.80455	23.6801	15.1728	2581.97	1983.74	1623.08
act-2	WBGene00000064	-0.968726	0.358206	0.472244	726.445	1038.41	2112.23	52.85	59.2002	182.073	1757.72	1118.24	1222.59
act-3	WBGene00000065	-3.03159	1.76933e-06	1.8377e-05	209.537	296.364	490.069	110.505	106.56	91.0365	2240.67	1675.22	1532.66
act-4	WBGene00000066	-1.20229	0.0299699	0.0711062	3781.08	4986.99	6226.53	2536.8	1835.21	1502.1	8912.42	7012.01	8133.42
act-5	WBGene00000067	-6.60438	3.3457e-14	1.80314e-12	42.3533	40.8604	49.3868	0	11.84	0	2204.22	2839.71	2958.27
acy-1	WBGene00000068	2.86286	0.00366371	0.0131107	958.026	789.969	319.115	52.85	94.7204	45.5183	41.1252	45.8771	70.3277
acy-2	WBGene00000069	6.47538	0.000103216	0.000629174	227.37	193.709	49.3868	0	11.84	75.8638	0	3.08339	0
acy-3	WBGene00000070	0.8319	0.104672	0.178736	67.1212	70.623	49.3868	57.6546	71.0403	91.0365	59.2943	29.5258	22.5187
acy-4	WBGene00000071	2.98406	2.03209e-05	0.000154234	181.054	123.338	91.1756	110.505	94.7204	0	17.1899	13.3614	9.00749
ada-2	WBGene00017967	1.05497	0.138299	0.216685	124.335	96.3499	106.372	557.327	438.082	182.073	85.8407	138.846	133.38
adbp-1	WBGene00012157	-1.46034	0.168043	0.255431	15.6038	14.1246	3.79898	38.4364	0	0	60.8174	42.6069	7.96817
add-1	WBGene00000072	1.7787	0.17882	0.268663	192.943	183.62	68.3817	0	0	15.1728	11.0973	30.9274	27.3689
add-2	WBGene00000073	-1.32876	0.0450071	0.0960091	20.0621	13.6201	26.5929	14.4136	11.84	0	29.0487	36.1598	58.5487
adm-2	WBGene00000074	1.61712	0.0118563	0.0343875	177.834	192.448	113.969	120.114	71.0403	333.801	99.4403	32.142	30.8333
adm-4	WBGene00000075	-0.342536	0.717043	0.788297	12.1363	12.1068	0	28.8273	71.0403	30.3455	32.8566	17.4726	34.6442
ador-1	WBGene00011878	1.98362	0.00111111	0.0048418	64.6444	49.9405	41.7888	62.4591	94.7204	15.1728	22.0858	12.3336	7.27528
adpr-1	WBGene00044440	-0.0574096	0.956868	0.969465	19.5667	25.2225	37.9898	0	23.6801	0	4.89586	36.5335	17.6685
adr-1	WBGene00000079	-0.168076	0.855087	0.896572	184.026	175.044	148.16	24.0227	35.5201	0	146.223	83.4385	103.24
adr-2	WBGene00000080	-4.30858	NA	NA	12.8794	7.56675	22.7939	0	0	0	79.2041	83.8122	364.457
ads-1	WBGene00000081	-3.53993	7.56994e-05	0.0004799	13.6224	8.32342	3.79898	52.85	82.8803	75.8638	393.3	444.195	371.039
adsl-1	WBGene00011064	-1.45641	0.0286339	0.0685444	71.3318	64.0651	132.964	19.2182	47.3602	15.1728	190.286	137.351	179.803
adss-1	WBGene00016509	-2.65586	0.000923852	0.00415355	101.053	99.6289	300.12	67.2637	71.0403	0	725.892	761.972	585.833
adt-1	WBGene00000082	0.469883	0.650584	0.734715	23.7773	17.6557	11.3969	144.136	224.961	348.973	93.5653	59.6123	114.326
adt-2	WBGene00000083	-1.03574	0.327964	0.440763	13.6224	11.3501	22.7939	91.2864	177.601	379.319	249.036	163.42	267.107
aex-1	WBGene00000084	-1.87539	0.392233	0.50641	0.74304	0	3.79898	4.80455	0	0	0	14.4826	8.31461
aex-2	WBGene00000085	0.818389	0.255467	0.360338	37.895	32.537	22.7939	14.4136	0	30.3455	13.7084	9.43705	20.0936
aex-3	WBGene00000086	3.851	1.13475e-06	1.24127e-05	971.4	890.354	444.481	201.791	177.601	106.209	16.9723	43.2609	37.7622
aex-4	WBGene00006454	2.63906	0.142472	0.222198	0.49536	0	0	225.814	82.8803	45.5183	6.41901	16.5382	5.19663
aex-5	WBGene00000088	7.43345	4.68882e-11	1.44102e-09	605.082	572.298	592.641	16268.2	11567.7	13776.9	21.8682	51.2964	52.3127
aex-6	WBGene00000089	1.59748	0.128627	0.203859	385.142	470.652	182.351	4.80455	35.5201	60.691	75.2874	58.6779	57.8558
aexr-1	WBGene00016089	2.38655	0.109024	0.184651	9.65952	5.0445	3.79898	62.4591	0	30.3455	9.13893	1.12123	0
aexr-2	WBGene00016090	4.23792	0.0182218	0.048222	1.73376	0.252225	3.79898	76.8728	59.2002	0	0.217594	3.3637	0
aexr-3	WBGene00016748	1.56442	0.182629	0.273541	56.2233	51.4539	22.7939	0	11.84	0	13.7084	2.61621	10.3933
afd-1	WBGene00021009	-0.640131	0.146726	0.227621	230.838	275.682	273.527	273.859	153.921	91.0365	309.418	309.834	426.124
aff-1	WBGene00016625	-1.53045	0.299286	0.410062	2.97216	1.26112	0	0	0	45.5183	9.90051	13.6417	14.5506
afmd-1	WBGene00017051	-0.190367	0.922485	0.946072	0	0.252225	0	0	59.2002	15.1728	21.5418	8.68956	6.23596
age-1	WBGene00000090	1.07576	0.0268766	0.0650437	102.539	105.682	106.372	67.2637	23.6801	136.555	41.6692	38.8694	50.2341
agef-1	WBGene00012386	1.8172	1.60067e-05	0.000125773	388.857	384.643	216.542	221.009	165.761	303.455	74.5258	85.6809	82.4532
agl-1	WBGene00011050	1.0451	0.0160898	0.0437373	137.958	138.976	163.356	273.859	224.961	288.282	113.149	97.3605	76.9101
agmo-1	WBGene00007210	-2.54908	0.0421481	0.0912729	1.98144	0.756675	15.1959	48.0455	153.921	121.382	381.986	243.495	309.373
agr-1	WBGene00018304	7.58899	1.17111e-08	2.15082e-07	265.265	225.994	117.768	17642.3	12988.5	9422.28	28.396	19.061	58.2023
ags-3	WBGene00000092	3.54097	9.68427e-14	4.89209e-12	963.97	1149.64	509.064	1705.61	1420.81	1426.24	94.218	79.3273	134.073
agt-1	WBGene00000093	-1.26257	0.0910361	0.160378	24.2726	21.4391	56.9847	48.0455	0	0	67.5628	71.759	60.9738
agt-2	WBGene00000094	0.626112	0.495888	0.603184	16.0992	12.359	18.9949	144.136	59.2002	91.0365	16.2107	32.142	57.1629
AH10.7	WBGene00197015	5.57885	0.111013	NA	1.48608	1.0089	0	0	0	0	0	0	0
AH10.8	WBGene00197630	10.9711	4.94612e-08	7.89165e-07	5.44896	2.77447	0	57.6546	177.601	106.209	0	0	0
AH10.9	WBGene00201406	5.62822	0.107875	NA	1.73376	1.0089	0	0	0	0	0	0	0
AH6.17	WBGene00219290	6.25997	0.0734806	0.135577	0	0	0	0	23.6801	0	0	0	0
AH6.3	WBGene00007081	-4.1753	0.00822806	0.0255135	1.2384	0	0	28.8273	47.3602	0	118.915	213.315	295.862
AH9.1	WBGene00014998	3.87641	0.00973241	0.0292341	25.2633	33.7981	26.5929	24.0227	11.84	136.555	8.37735	0	0
AH9.3	WBGene00014999	-0.429922	0.727982	0.797129	52.0128	46.1572	30.3919	0	0	0	13.4908	28.7783	55.0843
AH9.4	WBGene00015000	3.56805	0.0139351	0.0391538	69.8457	89.2876	26.5929	48.0455	0	0	9.03013	1.21467	0
AH9.6	WBGene00044701	1.76225	0.0401837	0.0881634	152.818	118.798	45.5878	19.2182	11.84	30.3455	21.5418	11.5861	26.676
AH9.7	WBGene00175029	5.54423	6.49605e-05	0.000419654	13.6224	23.9614	22.7939	168.159	82.8803	45.5183	0	3.64401	0
AH9.9	WBGene00219776	-0.00252031	0.999132	0.999506	1.2384	2.77447	3.79898	4.80455	0	0	8.48615	0	0
aha-1	WBGene00000095	1.0601	0.0651211	0.128122	108.731	105.934	87.3766	52.85	47.3602	30.3455	30.1367	54.193	26.676
ahcy-1	WBGene00019322	-4.54272	5.60743e-08	8.79593e-07	376.721	414.153	1538.59	172.964	402.562	60.691	11863.4	12057.6	10818.7
aho-3	WBGene00045192	0.183173	0.814099	0.865639	111.456	115.015	45.5878	4.80455	59.2002	75.8638	76.7017	71.1049	37.7622
ahr-1	WBGene00000096	-2.84999	9.52198e-05	0.00058663	62.663	59.5251	15.1959	91.2864	106.56	182.073	294.948	440.832	1026.85
ain-1	WBGene00015547	0.684541	0.389801	0.503999	663.534	682.268	296.321	105.7	82.8803	106.209	187.892	239.757	185.693
ain-2	WBGene00015007	-0.338598	0.655654	0.738724	384.895	385.147	258.331	33.6318	82.8803	121.382	324.758	243.775	249.785
aip-1	WBGene00000097	-2.02703	0.0257863	0.0630879	59.6908	46.6616	72.1807	9.60909	0	0	136.322	152.114	141.348
aipl-1	WBGene00010685	-1.63787	0.0108331	0.0319351	33.9321	36.8248	83.5776	19.2182	35.5201	0	108.362	113.992	127.144
air-1	WBGene00000098	-1.65039	0.152944	0.236069	9.9072	8.0712	106.372	9.60909	0	0	74.7434	91.3806	56.1236
air-2	WBGene00000099	-0.00836148	0.992482	0.99462	7.92576	13.6201	49.3868	57.6546	35.5201	0	16.5371	45.2231	20.4401
ajm-1	WBGene00000100	-2.52116	9.21219e-07	1.03358e-05	242.231	273.664	132.964	129.723	165.761	182.073	571.727	1020.04	1688.9
aka-1	WBGene00000101	0.722796	0.343515	0.456995	214.243	177.314	231.738	120.114	94.7204	0	95.9588	112.217	53.6985
akap-1	WBGene00016977	1.54894	0.0589748	0.118215	2784.17	2744.21	1644.96	542.914	390.722	242.764	425.178	508.386	499.223
akir-1	WBGene00017088	0.0423521	0.935804	0.955225	264.027	310.237	288.723	163.355	82.8803	106.209	213.242	217.8	180.15
akt-1	WBGene00000102	0.999634	0.0166433	0.044849	418.827	463.842	296.321	216.205	213.121	318.628	177.665	176.688	135.459
akt-2	WBGene00000103	-0.0948014	0.911616	0.938594	140.682	137.715	56.9847	28.8273	0	45.5183	59.1855	68.0215	104.972
aldo-1	WBGene00011474	0.11486	0.86909	0.9061	2110.48	2776.49	2279.39	831.187	378.882	561.392	1432.09	1400.14	1312.32
aldo-2	WBGene00017166	-4.24325	4.82221e-10	1.1805e-08	111.704	142.507	490.069	115.309	177.601	45.5183	3349.85	3746.32	3277
alfa-1	WBGene00017547	-1.87101	0.014951	0.0414259	34.9229	32.0326	34.1908	14.4136	0	0	93.8916	60.2663	101.854
alg-1	WBGene00000105	2.30651	0.0299469	0.0710596	1111.09	1300.72	573.646	221.009	35.5201	30.3455	141.327	131.558	60.2809
alg-2	WBGene00000106	0.983326	0.0962277	0.167743	188.98	272.655	125.366	115.309	118.4	30.3455	73.873	64.1906	86.957
alg-3	WBGene00011910	-2.51502	0.134626	0.212031	0	0.50445	15.1959	0	0	45.5183	44.3891	65.6856	29.794
alg-4	WBGene00006449	-3.50432	0.0082879	0.0256559	0.74304	0.50445	7.59796	38.4364	0	0	105.75	88.0169	73.7922
alh-1	WBGene00000107	-2.72794	4.91437e-05	0.000331174	46.3161	46.1572	144.361	72.0682	260.481	197.246	688.14	908.106	808.596
alh-10	WBGene00000116	-2.1965	0.070149	0.135473	2.4768	1.51335	0	9.60909	59.2002	15.1728	46.3474	51.6702	56.1236
alh-11	WBGene00000117	0.670539	0.425303	0.537784	75.5424	65.3263	72.1807	9.60909	0	91.0365	21.5418	48.1196	30.4869
alh-12	WBGene00000118	-4.52442	6.43755e-17	5.31806e-15	13.127	10.089	26.5929	14.4136	23.6801	0	292.772	319.365	376.929
alh-13	WBGene00011938	-5.56062	1.13084e-06	1.23762e-05	1.48608	2.77447	0	0	35.5201	15.1728	265.464	228.638	234.888
alh-2	WBGene00000108	5.34796	0.126658	NA	0.49536	1.0089	0	0	0	0	0	0	0
alh-3	WBGene00000109	-1.02889	0.172576	0.261033	30.96	29.7625	56.9847	48.0455	213.121	166.9	188.218	185.284	139.963
alh-4	WBGene00000110	-2.17491	0.0162065	0.0440001	68.855	91.3054	140.562	9.60909	11.84	303.455	494.699	441.766	436.517
alh-5	WBGene00000111	-3.96569	0.00569116	0.0188408	0	3.0267	0	0	11.84	15.1728	41.8868	32.4223	46.0768
alh-6	WBGene00000112	-1.08108	0.102084	0.175357	130.28	143.768	129.165	91.2864	0	91.0365	229.67	202.383	212.715
alh-7	WBGene00000113	-1.78	0.000135645	0.000796228	70.3411	67.0918	68.3817	72.0682	59.2002	15.1728	234.348	150.152	262.603
alh-8	WBGene00000114	-2.77472	1.36696e-09	3.07221e-08	269.476	353.367	820.58	663.027	615.682	591.738	3739.45	3870.59	3643.53
alh-9	WBGene00000115	-3.23022	6.87824e-09	1.32702e-07	16.8422	26.4836	41.7888	43.2409	23.6801	60.691	372.738	317.589	213.062
alkb-8	WBGene00007581	-1.32144	0.103736	0.177477	7.4304	12.359	22.7939	38.4364	0	30.3455	41.5604	67.7412	21.8258
alp-1	WBGene00001132	-1.26116	0.000295672	0.00156164	111.208	167.982	129.165	124.918	130.241	151.728	373.173	321.794	279.232
alr-1	WBGene00044330	2.09108	0.107617	0.182483	116.657	124.599	49.3868	4.80455	11.84	45.5183	20.0186	22.4247	0
alx-1	WBGene00007010	-0.231717	0.744947	0.810438	313.315	311.246	239.336	33.6318	71.0403	303.455	217.811	252.184	282.697
aly-1	WBGene00000120	-1.75985	0.102692	0.176088	33.6845	41.8693	26.5929	0	0	0	80.292	74.7489	48.5019
aly-2	WBGene00000121	-1.82662	0.0100298	0.029957	36.6566	49.1839	110.17	19.2182	47.3602	0	134.582	157.44	199.204
[truncated: 24,509 more rows]
[truncated: 3 more columns]
