# Supplementary material for: Profiling neural editomes reveals a molecular mechanism to regulate RNA editing during development
Source: HighWire-hosted journal article supplement (doi:10.1101/gr.267575.120), 2020-12-18
Supplement: Supplemental_Table_S2.xlsx [file Supplemental_Table_S2.xlsx]

## Sheet: adult neural editome
Supplemental Table 2: De novo identified adult neural editing sites (related to Fig. 1A and 1B). RNA-seq reads from isolated adult neural cells were analyzed by SAILOR, a previously published software program that predicts A-to-I editing sites. High confidence editing sites (>0.99 confidence, > 5 reads per site) identified are listed by chromosome and nucleotide position (column A). Fraction of e…
Chromosomal position	# of reads	Change	Fraction of edited reads	Conf	strand	feature	wbID	Gene Name	Novel site?	Mapped to a previously identified edited transcript?	Identified in Goldstein et al, 2017?	Identified in Zhao et al, 2015?	Identified in Whipple et al, 2015?	Identified in Washburn et al, 2014?	Identified in Ganem et al, 2019?	Identified in Deffit et al, 2017?
III 12620843	12	A>G	0.166667	0.99482	+	CDS	WBGene00013735	Y111B2A.12	Yes	Yes	No	No	No	No	No	No
V 10890018	11	T>C	0.181818	0.995734	-	CDS	WBGene00009334	F32D8.12	Yes	Yes	No	No	No	No	No	No
X 3686967	5	T>C	0.4	0.999408	-	CDS	WBGene00015356	tag-278	Yes	Yes	No	No	No	No	No	No
V 12290025	9	T>C	0.222222	0.99731	-	CDS	WBGene00010097	srpa-68	Yes	Yes	No	No	No	No	No	No
I 2590667	8	T>C	0.25	0.997969	-	CDS	WBGene00004226	ptr-12	Yes	Yes	No	No	No	No	No	No
I 3558299	12	T>C	0.166667	0.99482	-	CDS	WBGene00021646	Y47G6A.21	Yes	Yes	No	No	No	No	No	No
I 2981761	11	T>C	0.181818	0.995734	-	CDS	WBGene00044894	Y71F9AR.4	Yes	Novel	No	No	No	No	No	No
X 5406817	5	T>C	0.4	0.999408	-	CDS	WBGene00016559	C41A3.2	Yes	Novel	No	No	No	No	No	No
IV 12031741	13	A>G	0.153846	0.993825	+	CDS	WBGene00011740	mrpl-51	Yes	Yes	No	No	No	No	No	No
V 7181584	11	A>G	0.181818	0.995734	+	CDS	WBGene00017313	cpsf-2	Yes	Yes	No	No	No	No	No	No
IV 7053037	7	A>G	0.285714	0.99854	+	CDS	WBGene00003695	nhr-105	Yes	Novel	No	No	No	No	No	No
IV 10950006	11	A>G	0.272727	0.999886	+	CDS	WBGene00013474	Y69E1A.2	Yes	Novel	No	No	No	No	No	No
X 8069847	12	A>G	0.166667	0.99482	+	CDS	WBGene00015947	C18A11.1	Yes	Novel	No	No	No	No	No	No
V 6171795	12	T>C	0.333333	0.999997	-	CDS	WBGene00006436	ttn-1	Yes	Yes	No	No	No	No	No	No
I 2623066	14	A>G	0.142857	0.992751	+	CDS	WBGene00021269	Y23H5A.2	Yes	Novel	No	No	No	No	No	No
I 1071729	6	A>G	0.5	0.99999	+	CDS	WBGene00001745	gsa-1	Yes	Yes	No	No	No	No	No	No
IV 9992056	6	T>C	0.333333	0.99902	-	CDS	WBGene00006699	uba-1	Yes	Yes	No	No	No	No	No	No
IV 10258465	6	T>C	0.5	0.99999	-	CDS	WBGene00008511	F01G10.9	Yes	Novel	No	No	No	No	No	No
V 6395948	12	T>C	0.166667	0.99482	-	CDS	WBGene00001581	gfi-1	Yes	Yes	No	No	No	No	No	No
X 11396988	13	T>C	0.153846	0.993825	-	CDS	WBGene00004831	slo-2	Yes	Yes	No	No	No	No	No	No
II 7123751	11	A>G	0.181818	0.995734	+	CDS	WBGene00017344	F10E7.2	Yes	Yes	No	No	No	No	No	No
II 480746	5	T>C	0.4	0.999408	-	3'-UTR	WBGene00021074	W07E6.2	Yes	Yes	No	No	No	No	No	No
I 1259440	5	T>C	0.4	0.999408	-	3'-UTR	WBGene00001707	grh-1	Yes	Yes	No	No	No	No	No	No
I 1155115	22	T>C	0.136364	0.998838	-	3'-UTR	WBGene00000165	aps-3	Yes	Yes	No	No	No	No	No	No
V 3750019	5	T>C	0.4	0.999408	-	3'-UTR	WBGene00021482	Y39H10A.6	Yes	Yes	No	No	No	No	No	No
V 3750048	8	T>C	0.25	0.997969	-	3'-UTR	WBGene00021482	Y39H10A.6	Yes	Yes	No	No	No	No	No	No
I 1155328	18	T>C	0.222222	0.999979	-	3'-UTR	WBGene00000165	aps-3	Yes	Yes	No	No	No	No	No	No
V 3750107	12	T>C	0.166667	0.99482	-	3'-UTR	WBGene00021482	Y39H10A.6	Yes	Yes	No	No	No	No	No	No
I 1155277	16	T>C	0.375	1	-	3'-UTR	WBGene00000165	aps-3	Yes	Yes	No	No	No	No	No	No
IV 13408851	7	T>C	0.285714	0.99854	-	3'-UTR	WBGene00013382	gcl-1	Yes	Yes	No	No	No	No	No	No
V 10182955	14	A>G	0.285714	0.999993	+	3'-UTR	WBGene00000840	cul-5	Yes	Yes	No	No	No	No	No	No
I 630455	14	T>C	0.214286	0.999735	-	3'-UTR	WBGene00022029	Y65B4A.6	Yes	Yes	No	No	No	No	No	No
I 630495	5	T>C	0.4	0.999408	-	3'-UTR	WBGene00022029	Y65B4A.6	Yes	Yes	No	No	No	No	No	No
I 1154755	15	T>C	0.133333	0.991599	-	3'-UTR	WBGene00000165	aps-3	Yes	Yes	No	No	No	No	No	No
I 1154735	15	T>C	0.133333	0.991599	-	3'-UTR	WBGene00000165	aps-3	Yes	Yes	No	No	No	No	No	No
I 1154656	25	T>C	0.16	0.999909	-	3'-UTR	WBGene00000165	aps-3	Yes	Yes	No	No	No	No	No	No
III 11899453	11	T>C	0.181818	0.995734	-	3'-UTR	WBGene00013232	faah-4	Yes	Yes	No	No	No	No	No	No
III 12224580	9	T>C	0.777778	1	-	3'-UTR	WBGene00013552	gmn-1	Yes	Yes	No	No	No	No	No	No
III 12224594	11	T>C	0.545455	1	-	3'-UTR	WBGene00013552	gmn-1	Yes	Yes	No	No	No	No	No	No
III 12224577	9	T>C	0.333333	0.999946	-	3'-UTR	WBGene00013552	gmn-1	Yes	Yes	No	No	No	No	No	No
III 12224534	11	T>C	0.636364	1	-	3'-UTR	WBGene00013552	gmn-1	Yes	Yes	No	No	No	No	No	No
III 12224532	11	T>C	0.181818	0.995734	-	3'-UTR	WBGene00013552	gmn-1	Yes	Yes	No	No	No	No	No	No
III 12224504	8	T>C	0.375	0.999966	-	3'-UTR	WBGene00013552	gmn-1	Yes	Yes	No	No	No	No	No	No
III 12224505	9	T>C	0.222222	0.99731	-	3'-UTR	WBGene00013552	gmn-1	Yes	Yes	No	No	No	No	No	No
III 12224506	9	T>C	0.777778	1	-	3'-UTR	WBGene00013552	gmn-1	Yes	Yes	No	No	No	No	No	No
III 12224507	9	T>C	0.444444	0.999999	-	3'-UTR	WBGene00013552	gmn-1	Yes	Yes	No	No	No	No	No	No
III 12224512	9	T>C	0.555556	1	-	3'-UTR	WBGene00013552	gmn-1	Yes	Yes	No	No	No	No	No	No
III 12224523	8	T>C	0.75	1	-	3'-UTR	WBGene00013552	gmn-1	Yes	Yes	No	No	No	No	No	No
III 12224529	11	T>C	0.272727	0.999886	-	3'-UTR	WBGene00013552	gmn-1	Yes	Yes	No	No	No	No	No	No
V 13135836	5	T>C	0.8	1	-	3'-UTR	WBGene00007153	clec-41	Yes	Yes	No	No	No	No	No	No
I 12047834	13	T>C	0.153846	0.993825	-	3'-UTR	WBGene00002240	ksr-2	Yes	Yes	No	No	No	No	No	No
V 14026384	5	T>C	0.4	0.999408	-	3'-UTR	WBGene00011624	T08G5.3	Yes	Novel	No	No	No	No	No	No
I 12047839	14	T>C	0.142857	0.992751	-	3'-UTR	WBGene00002240	ksr-2	Yes	Yes	No	No	No	No	No	No
III 10405467	8	T>C	0.375	0.999966	-	3'-UTR	WBGene00044069	hat-1	Yes	Yes	No	No	No	No	No	No
I 12810109	5	T>C	0.4	0.999408	-	5'-UTR	WBGene00012475	Y18D10A.2	Yes	Yes	No	No	No	No	No	No
V 13135060	5	T>C	0.4	0.999408	-	3'-UTR	WBGene00007153	clec-41	Yes	Yes	No	No	No	No	No	No
V 13135059	5	T>C	0.6	0.999996	-	3'-UTR	WBGene00007153	clec-41	Yes	Yes	No	No	No	No	No	No
X 12169804	7	T>C	0.285714	0.99854	-	3'-UTR	WBGene00010221	F57G12.1	Yes	Yes	No	No	No	No	No	No
II 3567422	5	A>G	0.4	0.999408	+	3'-UTR	WBGene00021146	lgc-45	Yes	Novel	No	No	No	No	No	No
I 2076726	24	A>G	0.125	0.998475	+	3'-UTR	WBGene00021351	Y37E3.10	Yes	Yes	No	No	No	No	No	No
I 2076745	23	A>G	0.130435	0.998664	+	3'-UTR	WBGene00021351	Y37E3.10	Yes	Yes	No	No	No	No	No	No
II 3567411	5	A>G	0.6	0.999996	+	3'-UTR	WBGene00021146	lgc-45	Yes	Novel	No	No	No	No	No	No
I 10819244	15	A>G	0.133333	0.991599	+	3'-UTR	WBGene00016458	C35E7.6	Yes	Yes	No	No	No	No	No	No
I 10819243	15	A>G	0.133333	0.991599	+	3'-UTR	WBGene00016458	C35E7.6	Yes	Yes	No	No	No	No	No	No
I 10819210	16	A>G	0.125	0.99037	+	3'-UTR	WBGene00016458	C35E7.6	Yes	Yes	No	No	No	No	No	No
I 3034596	13	A>G	0.615385	1	+	3'-UTR	WBGene00021841	Y54E10BR.2	Yes	Yes	No	No	No	No	No	No
I 10819464	23	A>G	0.26087	1	+	3'-UTR	WBGene00016458	C35E7.6	Yes	Yes	No	No	No	No	No	No
I 10819498	20	A>G	0.2	0.999966	+	3'-UTR	WBGene00016458	C35E7.6	Yes	Yes	No	No	No	No	No	No
I 1358803	6	A>G	0.333333	0.99902	+	3'-UTR	WBGene00022363	Y92H12BL.1	Yes	Yes	No	No	No	No	No	No
I 1359440	5	A>G	0.4	0.999408	+	3'-UTR	WBGene00022363	Y92H12BL.1	Yes	Yes	No	No	No	No	No	No
I 2033893	9	A>G	0.222222	0.99731	+	3'-UTR	WBGene00021237	crtc-1	Yes	Yes	No	No	No	No	No	No
I 2033866	11	A>G	0.181818	0.995734	+	3'-UTR	WBGene00021237	crtc-1	Yes	Yes	No	No	No	No	No	No
V 2646592	5	A>G	0.4	0.999408	+	3'-UTR	WBGene00020957	W02H5.2	Yes	Yes	No	No	No	No	No	No
V 2646558	5	A>G	0.6	0.999996	+	3'-UTR	WBGene00020957	W02H5.2	Yes	Yes	No	No	No	No	No	No
I 11560513	16	A>G	0.25	0.999988	+	exon	WBGene00000642	col-66	Yes	Novel	No	No	No	No	No	No
III 11657949	5	A>G	0.4	0.999408	+	intron	WBGene00000793	crh-1	Yes	Yes	No	No	No	No	No	No
I 2076463	11	A>G	0.363636	0.999998	+	3'-UTR	WBGene00021351	Y37E3.10	Yes	Yes	No	No	No	No	No	No
I 2076481	8	A>G	0.75	1	+	3'-UTR	WBGene00021351	Y37E3.10	Yes	Yes	No	No	No	No	No	No
I 3034382	6	A>G	0.5	0.99999	+	3'-UTR	WBGene00021841	Y54E10BR.2	Yes	Yes	No	No	No	No	No	No
I 3034589	13	A>G	0.153846	0.993825	+	3'-UTR	WBGene00021841	Y54E10BR.2	Yes	Yes	No	No	No	No	No	No
II 13486027	13	T>C	0.230769	0.999794	-	3'-UTR	WBGene00000113	alh-7	Yes	Yes	No	No	No	No	No	No
II 13486034	13	T>C	0.153846	0.993825	-	3'-UTR	WBGene00000113	alh-7	Yes	Yes	No	No	No	No	No	No
II 13486053	12	T>C	0.25	0.999845	-	3'-UTR	WBGene00000113	alh-7	Yes	Yes	No	No	No	No	No	No
II 13486389	6	T>C	0.333333	0.99902	-	3'-UTR	WBGene00000113	alh-7	Yes	Yes	No	No	No	No	No	No
II 13486026	13	T>C	0.153846	0.993825	-	3'-UTR	WBGene00000113	alh-7	Yes	Yes	No	No	No	No	No	No
II 13486011	14	T>C	0.357143	1	-	3'-UTR	WBGene00000113	alh-7	Yes	Yes	No	No	No	No	No	No
II 13486010	14	T>C	0.142857	0.992751	-	3'-UTR	WBGene00000113	alh-7	Yes	Yes	No	No	No	No	No	No
II 13485942	11	T>C	0.454545	1	-	3'-UTR	WBGene00000113	alh-7	Yes	Yes	No	No	No	No	No	No
II 13485946	12	T>C	0.333333	0.999997	-	3'-UTR	WBGene00000113	alh-7	Yes	Yes	No	No	No	No	No	No
I 2394662	5	T>C	0.6	0.999996	-	intron	WBGene00021474	dot-1.1	Yes	Yes	No	No	No	No	No	No
I 2394672	5	T>C	0.4	0.999408	-	intron	WBGene00021474	dot-1.1	Yes	Yes	No	No	No	No	No	No
I 2394677	5	T>C	0.4	0.999408	-	intron	WBGene00021474	dot-1.1	Yes	Yes	No	No	No	No	No	No
I 2394661	5	T>C	0.4	0.999408	-	intron	WBGene00021474	dot-1.1	Yes	Yes	No	No	No	No	No	No
I 2394618	7	T>C	0.285714	0.99854	-	intron	WBGene00021474	dot-1.1	Yes	Yes	No	No	No	No	No	No
II 3922354	6	T>C	0.333333	0.99902	-	3'-UTR	WBGene00018756	F53C3.13	Yes	Yes	No	No	No	No	No	No
I 2034072	5	A>G	0.6	0.999996	+	3'-UTR	WBGene00021237	crtc-1	Yes	Yes	No	No	No	No	No	No
I 10820090	8	A>G	0.25	0.997969	+	3'-UTR	WBGene00016458	C35E7.6	Yes	Yes	No	No	No	No	No	No
I 10820125	16	A>G	0.125	0.99037	+	3'-UTR	WBGene00016458	C35E7.6	Yes	Yes	No	No	No	No	No	No
I 10820234	14	A>G	0.214286	0.999735	+	3'-UTR	WBGene00016458	C35E7.6	Yes	Yes	No	No	No	No	No	No
I 13658470	9	A>G	0.222222	0.99731	+	intergenic	intergenic	#N/A	Yes	Yes	No	No	No	No	No	No
II 5725302	13	A>G	0.153846	0.993825	+	intergenic	intergenic	#N/A	Yes	Yes	No	No	No	No	No	No
II 5725309	13	A>G	0.153846	0.993825	+	intergenic	intergenic	#N/A	Yes	Yes	No	No	No	No	No	No
V 2646837	7	A>G	0.285714	0.99854	+	3'-UTR	WBGene00020957	W02H5.2	Yes	Yes	No	No	No	No	No	No
V 6172989	19	A>G	0.157895	0.999271	+	intergenic	intergenic	#N/A	Yes	Yes	No	No	No	No	No	No
V 6174117	22	A>G	0.227273	0.999998	+	intergenic	intergenic	#N/A	Yes	Yes	No	No	No	No	No	No
I 10819605	5	T>C	0.6	0.999996	-	intergenic	intergenic	#N/A	Yes	Yes	No	No	No	No	No	No
I 10819627	5	T>C	0.8	1	-	intergenic	intergenic	#N/A	Yes	Yes	No	No	No	No	No	No
I 10819628	5	T>C	0.8	1	-	intergenic	intergenic	#N/A	Yes	Yes	No	No	No	No	No	No
I 10819629	5	T>C	0.8	1	-	intergenic	intergenic	#N/A	Yes	Yes	No	No	No	No	No	No
I 10819630	5	T>C	0.4	0.999408	-	intergenic	intergenic	#N/A	Yes	Yes	No	No	No	No	No	No
I 10819639	5	T>C	0.4	0.999408	-	intergenic	intergenic	#N/A	Yes	Yes	No	No	No	No	No	No
I 10819640	5	T>C	0.4	0.999408	-	intergenic	intergenic	#N/A	Yes	Yes	No	No	No	No	No	No
I 11924697	6	T>C	0.333333	0.99902	-	3'-UTR	WBGene00006958	wve-1	Yes	Yes	No	No	No	No	No	No
III 4412097	9	T>C	0.222222	0.99731	-	intergenic	intergenic	#N/A	Yes	Yes	No	No	No	No	No	No
III 12224037	11	T>C	0.181818	0.995734	-	3'-UTR	WBGene00013552	gmn-1	Yes	Yes	No	No	No	No	No	No
III 12224085	10	T>C	0.5	1	-	3'-UTR	WBGene00013552	gmn-1	Yes	Yes	No	No	No	No	No	No
III 12224086	10	T>C	0.6	1	-	3'-UTR	WBGene00013552	gmn-1	Yes	Yes	No	No	No	No	No	No
III 12224099	9	T>C	0.222222	0.99731	-	3'-UTR	WBGene00013552	gmn-1	Yes	Yes	No	No	No	No	No	No
III 12224107	7	T>C	0.428571	0.99998	-	3'-UTR	WBGene00013552	gmn-1	Yes	Yes	No	No	No	No	No	No
III 12224123	6	T>C	0.5	0.99999	-	3'-UTR	WBGene00013552	gmn-1	Yes	Yes	No	No	No	No	No	No
III 12224124	6	T>C	0.666667	1	-	3'-UTR	WBGene00013552	gmn-1	Yes	Yes	No	No	No	No	No	No
III 12224437	5	T>C	0.4	0.999408	-	3'-UTR	WBGene00013552	gmn-1	Yes	Yes	No	No	No	No	No	No
III 12224438	5	T>C	0.4	0.999408	-	3'-UTR	WBGene00013552	gmn-1	Yes	Yes	No	No	No	No	No	No
III 12224447	6	T>C	0.5	0.99999	-	3'-UTR	WBGene00013552	gmn-1	Yes	Yes	No	No	No	No	No	No
III 12224464	7	T>C	0.428571	0.99998	-	3'-UTR	WBGene00013552	gmn-1	Yes	Yes	No	No	No	No	No	No
III 12224486	7	T>C	0.428571	0.99998	-	3'-UTR	WBGene00013552	gmn-1	Yes	Yes	No	No	No	No	No	No
IV 7727609	6	T>C	0.333333	0.99902	-	intergenic	intergenic	#N/A	Yes	Yes	No	No	No	No	No	No
V 19926821	16	T>C	0.1875	0.999584	-	3'-UTR	WBGene00013362	Y60A3A.14	Yes	Yes	No	No	No	No	No	No
V 19927307	8	T>C	0.375	0.999966	-	3'-UTR	WBGene00013362	Y60A3A.14	Yes	Yes	No	No	No	No	No	No
X 9479243	8	T>C	0.25	0.997969	-	intergenic	intergenic	#N/A	Yes	Yes	No	No	No	No	No	No
IV 13408514	5	T>C	0.4	0.999408	-	3'-UTR	WBGene00013382	gcl-1	No	Yes	No	No	Yes	No	No	No
V 6173811	28	T>C	0.178571	0.999993	-	CDS	WBGene00006436	ttn-1	No	Yes	No	No	Yes	No	No	No
I 629843	8	T>C	0.375	0.999966	-	3'-UTR	WBGene00022029	Y65B4A.6	No	Yes	No	No	Yes	No	No	No
I 1154736	15	T>C	0.133333	0.991599	-	3'-UTR	WBGene00000165	aps-3	No	Yes	No	No	Yes	No	No	No
II 14065926	7	A>G	0.285714	0.99854	+	3'-UTR	WBGene00002275	lem-2	No	Yes	Yes	No	Yes	No	Yes	No
I 12749141	9	A>G	0.222222	0.99731	+	3'-UTR	WBGene00006700	uba-2	No	Yes	No	No	Yes	No	No	No
I 2076633	11	A>G	0.181818	0.995734	+	3'-UTR	WBGene00021351	Y37E3.10	No	Yes	Yes	No	Yes	No	No	No
I 2296765	9	A>G	0.333333	0.999946	+	3'-UTR	WBGene00021469	Y39G10AR.11	No	Yes	Yes	No	Yes	No	No	No
II 13485941	11	T>C	0.181818	0.995734	-	3'-UTR	WBGene00000113	alh-7	No	Yes	Yes	No	Yes	No	No	No
I 10820200	16	A>G	0.125	0.99037	+	3'-UTR	WBGene00016458	C35E7.6	No	Yes	No	No	Yes	No	No	No
I 10820246	13	A>G	0.153846	0.993825	+	3'-UTR	WBGene00016458	C35E7.6	No	Yes	No	No	Yes	No	No	No
II 3211202	7	A>G	0.428571	0.99998	+	5'-UTR	WBGene00022568	ZC239.5	No	Yes	Yes	No	No	No	No	No
V 2646811	7	A>G	0.285714	0.99854	+	3'-UTR	WBGene00020957	W02H5.2	No	Yes	No	No	Yes	No	No	No
V 6173757	14	A>G	0.214286	0.999735	+	intergenic	intergenic	#N/A	No	Yes	No	No	Yes	No	No	No
III 12224106	8	T>C	0.25	0.997969	-	3'-UTR	WBGene00013552	gmn-1	No	Yes	Yes	No	Yes	No	No	No
I 629842	8	T>C	0.375	0.999966	-	3'-UTR	WBGene00022029	Y65B4A.6	No	Yes	No	No	No	No	No	Yes
I 630406	16	T>C	0.3125	1	-	3'-UTR	WBGene00022029	Y65B4A.6	No	Yes	No	No	No	No	No	Yes
I 630439	13	T>C	0.230769	0.999794	-	3'-UTR	WBGene00022029	Y65B4A.6	No	Yes	No	No	No	No	No	Yes
V 8924340	6	T>C	0.333333	0.99902	-	3'-UTR	WBGene00019204	H14N18.4	No	Yes	No	No	No	No	No	Yes
I 630423	14	T>C	0.642857	1	-	3'-UTR	WBGene00022029	Y65B4A.6	No	Yes	No	No	No	No	No	Yes
I 630410	14	T>C	0.357143	1	-	3'-UTR	WBGene00022029	Y65B4A.6	No	Yes	No	No	No	No	No	Yes
I 630438	13	T>C	0.384615	1	-	3'-UTR	WBGene00022029	Y65B4A.6	No	Yes	No	No	No	No	No	Yes
I 630424	14	T>C	0.285714	0.999993	-	3'-UTR	WBGene00022029	Y65B4A.6	No	Yes	No	No	No	No	No	Yes
I 629831	8	T>C	0.5	1	-	3'-UTR	WBGene00022029	Y65B4A.6	No	Yes	No	No	No	No	No	Yes
I 629832	8	T>C	0.25	0.997969	-	3'-UTR	WBGene00022029	Y65B4A.6	No	Yes	No	No	No	No	No	Yes
I 2722409	7	T>C	0.428571	0.99998	-	3'-UTR	WBGene00022128	Y71F9B.6	No	Yes	No	No	No	No	No	Yes
I 629833	8	T>C	0.375	0.999966	-	3'-UTR	WBGene00022029	Y65B4A.6	No	Yes	No	No	No	No	No	Yes
I 629921	6	T>C	0.5	0.99999	-	3'-UTR	WBGene00022029	Y65B4A.6	No	Yes	No	No	No	No	No	Yes
I 1155181	17	T>C	0.470588	1	-	3'-UTR	WBGene00000165	aps-3	No	Yes	No	No	No	No	No	Yes
I 1155173	14	T>C	0.571429	1	-	3'-UTR	WBGene00000165	aps-3	No	Yes	No	No	No	No	No	Yes
I 1155169	15	T>C	0.2	0.999665	-	3'-UTR	WBGene00000165	aps-3	No	Yes	No	No	No	No	No	Yes
I 1155232	17	T>C	0.294118	1	-	3'-UTR	WBGene00000165	aps-3	No	Yes	No	No	No	No	No	Yes
I 1155198	17	T>C	0.941176	1	-	3'-UTR	WBGene00000165	aps-3	No	Yes	No	No	No	No	No	Yes
I 1155168	15	T>C	0.4	1	-	3'-UTR	WBGene00000165	aps-3	No	Yes	No	No	No	No	No	Yes
I 1155162	15	T>C	0.6	1	-	3'-UTR	WBGene00000165	aps-3	No	Yes	No	No	No	No	No	Yes
I 1155161	15	T>C	0.733333	1	-	3'-UTR	WBGene00000165	aps-3	No	Yes	No	No	No	No	No	Yes
I 1155086	19	T>C	0.210526	0.999973	-	3'-UTR	WBGene00000165	aps-3	No	Yes	No	No	No	No	No	Yes
I 1155080	18	T>C	0.777778	1	-	3'-UTR	WBGene00000165	aps-3	No	Yes	No	No	No	No	No	Yes
I 1155079	18	T>C	0.166667	0.999388	-	3'-UTR	WBGene00000165	aps-3	No	Yes	No	No	No	No	No	Yes
I 1155057	13	T>C	0.153846	0.993825	-	3'-UTR	WBGene00000165	aps-3	No	Yes	No	No	No	No	No	Yes
I 1155055	13	T>C	0.846154	1	-	3'-UTR	WBGene00000165	aps-3	No	Yes	No	No	No	No	No	Yes
I 1155046	12	T>C	0.833333	1	-	3'-UTR	WBGene00000165	aps-3	No	Yes	No	No	No	No	No	Yes
I 1155039	10	T>C	0.6	1	-	3'-UTR	WBGene00000165	aps-3	No	Yes	No	No	No	No	No	Yes
I 1155142	22	T>C	0.272727	1	-	3'-UTR	WBGene00000165	aps-3	No	Yes	No	No	No	No	No	Yes
I 1155135	21	T>C	0.47619	1	-	3'-UTR	WBGene00000165	aps-3	No	Yes	No	No	No	No	No	Yes
I 1155131	21	T>C	0.380952	1	-	3'-UTR	WBGene00000165	aps-3	No	Yes	No	No	No	No	No	Yes
I 1155091	19	T>C	0.263158	0.999999	-	3'-UTR	WBGene00000165	aps-3	No	Yes	No	No	No	No	No	Yes
I 1155109	21	T>C	0.428571	1	-	3'-UTR	WBGene00000165	aps-3	No	Yes	No	No	No	No	No	Yes
I 1155104	21	T>C	0.142857	0.998996	-	3'-UTR	WBGene00000165	aps-3	No	Yes	No	No	No	No	No	Yes
I 1155097	20	T>C	0.45	1	-	3'-UTR	WBGene00000165	aps-3	No	Yes	No	No	No	No	No	Yes
I 1155272	18	T>C	0.333333	1	-	3'-UTR	WBGene00000165	aps-3	No	Yes	No	No	No	No	No	Yes
V 3750024	5	T>C	0.6	0.999996	-	3'-UTR	WBGene00021482	Y39H10A.6	No	Yes	No	No	No	No	No	Yes
I 1155290	17	T>C	0.176471	0.999492	-	3'-UTR	WBGene00000165	aps-3	No	Yes	No	No	No	No	No	Yes
V 3750012	6	T>C	0.833333	1	-	3'-UTR	WBGene00021482	Y39H10A.6	No	Yes	No	No	No	No	No	Yes
V 3750123	11	T>C	0.363636	0.999998	-	3'-UTR	WBGene00021482	Y39H10A.6	No	Yes	No	No	No	No	No	Yes
V 3750147	12	T>C	0.25	0.999845	-	3'-UTR	WBGene00021482	Y39H10A.6	No	Yes	No	No	No	No	No	Yes
I 1155312	20	T>C	0.9	1	-	3'-UTR	WBGene00000165	aps-3	No	Yes	No	No	No	No	No	Yes
V 3750117	12	T>C	0.583333	1	-	3'-UTR	WBGene00021482	Y39H10A.6	No	Yes	No	No	No	No	No	Yes
V 3750108	12	T>C	0.5	1	-	3'-UTR	WBGene00021482	Y39H10A.6	No	Yes	No	No	No	No	No	Yes
V 3750058	8	T>C	0.375	0.999966	-	3'-UTR	WBGene00021482	Y39H10A.6	No	Yes	No	No	No	No	No	Yes
V 3750089	10	T>C	0.3	0.99992	-	3'-UTR	WBGene00021482	Y39H10A.6	No	Yes	No	No	No	No	No	Yes
V 3750085	9	T>C	0.333333	0.999946	-	3'-UTR	WBGene00021482	Y39H10A.6	No	Yes	No	No	No	No	No	Yes
V 3750060	9	T>C	0.222222	0.99731	-	3'-UTR	WBGene00021482	Y39H10A.6	No	Yes	No	No	No	No	No	Yes
V 3750005	6	T>C	0.5	0.99999	-	3'-UTR	WBGene00021482	Y39H10A.6	No	Yes	No	No	No	No	No	Yes
I 1155283	17	T>C	0.411765	1	-	3'-UTR	WBGene00000165	aps-3	No	Yes	No	No	No	No	No	Yes
I 1155276	18	T>C	0.222222	0.999979	-	3'-UTR	WBGene00000165	aps-3	No	Yes	No	No	No	No	No	Yes
I 631011	9	T>C	0.666667	1	-	3'-UTR	WBGene00022029	Y65B4A.6	No	Yes	No	No	No	No	No	Yes
IV 13408861	7	T>C	0.714286	1	-	3'-UTR	WBGene00013382	gcl-1	No	Yes	No	No	No	No	No	Yes
IV 13408857	7	T>C	0.714286	1	-	3'-UTR	WBGene00013382	gcl-1	No	Yes	No	No	No	No	No	Yes
I 631010	9	T>C	0.777778	1	-	3'-UTR	WBGene00022029	Y65B4A.6	No	Yes	No	No	No	No	No	Yes
IV 13408853	7	T>C	0.571429	1	-	3'-UTR	WBGene00013382	gcl-1	No	Yes	No	No	No	No	No	Yes
IV 13408852	7	T>C	0.714286	1	-	3'-UTR	WBGene00013382	gcl-1	No	Yes	No	No	No	No	No	Yes
I 631009	10	T>C	0.2	0.996564	-	3'-UTR	WBGene00022029	Y65B4A.6	No	Yes	No	No	No	No	No	Yes
IV 13408850	7	T>C	0.428571	0.99998	-	3'-UTR	WBGene00013382	gcl-1	No	Yes	No	No	No	No	No	Yes
I 631001	9	T>C	0.444444	0.999999	-	3'-UTR	WBGene00022029	Y65B4A.6	No	Yes	No	No	No	No	No	Yes
IV 13408879	8	T>C	0.75	1	-	3'-UTR	WBGene00013382	gcl-1	No	Yes	No	No	No	No	No	Yes
I 1154603	18	T>C	0.444444	1	-	3'-UTR	WBGene00000165	aps-3	No	Yes	No	No	No	No	No	Yes
IV 13408932	5	T>C	0.8	1	-	3'-UTR	WBGene00013382	gcl-1	No	Yes	No	No	No	No	No	Yes
IV 13408931	5	T>C	0.8	1	-	3'-UTR	WBGene00013382	gcl-1	No	Yes	No	No	No	No	No	Yes
IV 13408928	5	T>C	0.4	0.999408	-	3'-UTR	WBGene00013382	gcl-1	No	Yes	No	No	No	No	No	Yes
IV 13408927	5	T>C	0.4	0.999408	-	3'-UTR	WBGene00013382	gcl-1	No	Yes	No	No	No	No	No	Yes
I 630457	14	T>C	0.928571	1	-	3'-UTR	WBGene00022029	Y65B4A.6	No	Yes	No	No	No	No	No	Yes
I 630446	13	T>C	0.153846	0.993825	-	3'-UTR	WBGene00022029	Y65B4A.6	No	Yes	No	No	No	No	No	Yes
I 630994	9	T>C	0.666667	1	-	3'-UTR	WBGene00022029	Y65B4A.6	No	Yes	No	No	No	No	No	Yes
I 630469	12	T>C	0.416667	1	-	3'-UTR	WBGene00022029	Y65B4A.6	No	Yes	No	No	No	No	No	Yes
I 630963	7	T>C	0.571429	1	-	3'-UTR	WBGene00022029	Y65B4A.6	No	Yes	No	No	No	No	No	Yes
I 1154746	14	T>C	0.285714	0.999993	-	3'-UTR	WBGene00000165	aps-3	No	Yes	No	No	No	No	No	Yes
I 1154795	14	T>C	0.285714	0.999993	-	3'-UTR	WBGene00000165	aps-3	No	Yes	No	No	No	No	No	Yes
I 1154774	14	T>C	0.285714	0.999993	-	3'-UTR	WBGene00000165	aps-3	No	Yes	No	No	No	No	No	Yes
I 1154823	10	T>C	0.8	1	-	3'-UTR	WBGene00000165	aps-3	No	Yes	No	No	No	No	No	Yes
I 1154725	16	T>C	0.1875	0.999584	-	3'-UTR	WBGene00000165	aps-3	No	Yes	No	No	No	No	No	Yes
I 1154709	16	T>C	0.9375	1	-	3'-UTR	WBGene00000165	aps-3	No	Yes	No	No	No	No	No	Yes
I 1154822	10	T>C	0.9	1	-	3'-UTR	WBGene00000165	aps-3	No	Yes	No	No	No	No	No	Yes
I 1154879	5	T>C	0.4	0.999408	-	3'-UTR	WBGene00000165	aps-3	No	Yes	No	No	No	No	No	Yes
I 1154878	5	T>C	0.6	0.999996	-	3'-UTR	WBGene00000165	aps-3	No	Yes	No	No	No	No	No	Yes
I 1154865	8	T>C	0.375	0.999966	-	3'-UTR	WBGene00000165	aps-3	No	Yes	No	No	No	No	No	Yes
I 1154840	9	T>C	0.333333	0.999946	-	3'-UTR	WBGene00000165	aps-3	No	Yes	No	No	No	No	No	Yes
I 1154858	9	T>C	0.222222	0.99731	-	3'-UTR	WBGene00000165	aps-3	No	Yes	No	No	No	No	No	Yes
I 1154708	16	T>C	0.875	1	-	3'-UTR	WBGene00000165	aps-3	No	Yes	No	No	No	No	No	Yes
I 1154660	26	T>C	0.230769	1	-	3'-UTR	WBGene00000165	aps-3	No	Yes	No	No	No	No	No	Yes
I 1154650	22	T>C	0.818182	1	-	3'-UTR	WBGene00000165	aps-3	No	Yes	No	No	No	No	No	Yes
I 1154646	22	T>C	0.318182	1	-	3'-UTR	WBGene00000165	aps-3	No	Yes	No	No	No	No	No	Yes
I 1154645	22	T>C	0.863636	1	-	3'-UTR	WBGene00000165	aps-3	No	Yes	No	No	No	No	No	Yes
I 1154701	20	T>C	0.15	0.999141	-	3'-UTR	WBGene00000165	aps-3	No	Yes	No	No	No	No	No	Yes
I 1154671	27	T>C	0.296296	1	-	3'-UTR	WBGene00000165	aps-3	No	Yes	No	No	No	No	No	Yes
I 1154702	20	T>C	0.25	0.999999	-	3'-UTR	WBGene00000165	aps-3	No	Yes	No	No	No	No	No	Yes
V 13135849	6	T>C	0.666667	1	-	3'-UTR	WBGene00007153	clec-41	No	Yes	No	No	No	No	No	Yes
II 13487363	12	T>C	0.166667	0.99482	-	3'-UTR	WBGene00000113	alh-7	No	Yes	No	No	No	No	No	Yes
II 13487364	12	T>C	0.25	0.999845	-	3'-UTR	WBGene00000113	alh-7	No	Yes	No	No	No	No	No	Yes
II 13487402	10	T>C	0.2	0.996564	-	3'-UTR	WBGene00000113	alh-7	No	Yes	No	No	No	No	No	Yes
V 13135861	7	T>C	0.571429	1	-	3'-UTR	WBGene00007153	clec-41	No	Yes	No	No	No	No	No	Yes
V 13135854	6	T>C	0.333333	0.99902	-	3'-UTR	WBGene00007153	clec-41	No	Yes	No	No	No	No	No	Yes
III 12671444	7	T>C	0.428571	0.99998	-	3'-UTR	WBGene00006389	taf-7.2	No	Yes	No	No	No	No	No	Yes
III 12671462	8	T>C	0.375	0.999966	-	3'-UTR	WBGene00006389	taf-7.2	No	Yes	No	No	No	No	No	Yes
III 12671463	8	T>C	0.375	0.999966	-	3'-UTR	WBGene00006389	taf-7.2	No	Yes	No	No	No	No	No	Yes
V 13135915	15	T>C	0.266667	0.999991	-	3'-UTR	WBGene00007153	clec-41	No	Yes	No	No	No	No	No	Yes
V 13135914	15	T>C	0.2	0.999665	-	3'-UTR	WBGene00007153	clec-41	No	Yes	No	No	No	No	No	Yes
V 13037084	11	T>C	0.272727	0.999886	-	3'-UTR	WBGene00012337	W07G4.3	No	Yes	No	No	No	No	No	Yes
V 13037088	9	T>C	0.333333	0.999946	-	3'-UTR	WBGene00012337	W07G4.3	No	Yes	No	No	No	No	No	Yes
V 3750124	10	T>C	0.3	0.99992	-	3'-UTR	WBGene00021482	Y39H10A.6	No	Yes	No	No	No	No	No	Yes
I 10819616	19	A>G	0.210526	0.999973	+	3'-UTR	WBGene00016458	C35E7.6	No	Yes	No	No	No	No	No	Yes
I 2296711	9	A>G	0.333333	0.999946	+	3'-UTR	WBGene00021469	Y39G10AR.11	No	Yes	No	No	No	No	No	Yes
I 2296719	9	A>G	0.444444	0.999999	+	3'-UTR	WBGene00021469	Y39G10AR.11	No	Yes	No	No	No	No	No	Yes
I 2296726	10	A>G	0.4	0.999999	+	3'-UTR	WBGene00021469	Y39G10AR.11	No	Yes	No	No	No	No	No	Yes
I 2296727	10	A>G	0.6	1	+	3'-UTR	WBGene00021469	Y39G10AR.11	No	Yes	No	No	No	No	No	Yes
I 2296730	10	A>G	0.3	0.99992	+	3'-UTR	WBGene00021469	Y39G10AR.11	No	Yes	No	No	No	No	No	Yes
I 2296697	8	A>G	0.5	1	+	3'-UTR	WBGene00021469	Y39G10AR.11	No	Yes	No	No	No	No	No	Yes
I 10819642	22	A>G	0.636364	1	+	3'-UTR	WBGene00016458	C35E7.6	No	Yes	No	No	No	No	No	Yes
I 10819636	20	A>G	0.45	1	+	3'-UTR	WBGene00016458	C35E7.6	No	Yes	No	No	No	No	No	Yes
I 10819633	20	A>G	0.15	0.999141	+	3'-UTR	WBGene00016458	C35E7.6	No	Yes	No	No	No	No	No	Yes
I 10819620	19	A>G	0.210526	0.999973	+	3'-UTR	WBGene00016458	C35E7.6	No	Yes	No	No	No	No	No	Yes
I 10819518	19	A>G	0.789474	1	+	3'-UTR	WBGene00016458	C35E7.6	No	Yes	No	No	No	No	No	Yes
I 10819506	19	A>G	0.368421	1	+	3'-UTR	WBGene00016458	C35E7.6	No	Yes	No	No	No	No	No	Yes
I 10819504	20	A>G	0.75	1	+	3'-UTR	WBGene00016458	C35E7.6	No	Yes	No	No	No	No	No	Yes
I 10819550	22	A>G	0.272727	1	+	3'-UTR	WBGene00016458	C35E7.6	No	Yes	No	No	No	No	No	Yes
I 2296735	11	A>G	0.181818	0.995734	+	3'-UTR	WBGene00021469	Y39G10AR.11	No	Yes	No	No	No	No	No	Yes
I 10819581	20	A>G	0.7	1	+	3'-UTR	WBGene00016458	C35E7.6	No	Yes	No	No	No	No	No	Yes
I 10819560	22	A>G	0.136364	0.998838	+	3'-UTR	WBGene00016458	C35E7.6	No	Yes	No	No	No	No	No	Yes
I 10819897	8	A>G	0.25	0.997969	+	3'-UTR	WBGene00016458	C35E7.6	No	Yes	No	No	No	No	No	Yes
I 2076697	14	A>G	0.357143	1	+	3'-UTR	WBGene00021351	Y37E3.10	No	Yes	No	No	No	No	No	Yes
I 10819770	17	A>G	0.176471	0.999492	+	3'-UTR	WBGene00016458	C35E7.6	No	Yes	No	No	No	No	No	Yes
I 2076702	14	A>G	0.571429	1	+	3'-UTR	WBGene00021351	Y37E3.10	No	Yes	No	No	No	No	No	Yes
I 2076735	23	A>G	0.478261	1	+	3'-UTR	WBGene00021351	Y37E3.10	No	Yes	No	No	No	No	No	Yes
I 10819761	20	A>G	0.2	0.999966	+	3'-UTR	WBGene00016458	C35E7.6	No	Yes	No	No	No	No	No	Yes
I 10819963	12	A>G	0.25	0.999845	+	3'-UTR	WBGene00016458	C35E7.6	No	Yes	No	No	No	No	No	Yes
I 2076388	22	A>G	0.318182	1	+	3'-UTR	WBGene00021351	Y37E3.10	No	Yes	No	No	No	No	No	Yes
I 10819941	13	A>G	0.461538	1	+	3'-UTR	WBGene00016458	C35E7.6	No	Yes	No	No	No	No	No	Yes
I 10819940	13	A>G	0.384615	1	+	3'-UTR	WBGene00016458	C35E7.6	No	Yes	No	No	No	No	No	Yes
V 2646512	5	A>G	0.6	0.999996	+	3'-UTR	WBGene00020957	W02H5.2	No	Yes	No	No	No	No	No	Yes
I 10819939	13	A>G	0.307692	0.999995	+	3'-UTR	WBGene00016458	C35E7.6	No	Yes	No	No	No	No	No	Yes
V 2646508	5	A>G	0.4	0.999408	+	3'-UTR	WBGene00020957	W02H5.2	No	Yes	No	No	No	No	No	Yes
I 2076767	33	A>G	0.30303	1	+	3'-UTR	WBGene00021351	Y37E3.10	No	Yes	No	No	No	No	No	Yes
I 10819693	20	A>G	0.8	1	+	3'-UTR	WBGene00016458	C35E7.6	No	Yes	No	No	No	No	No	Yes
I 10819667	19	A>G	0.894737	1	+	3'-UTR	WBGene00016458	C35E7.6	No	Yes	No	No	No	No	No	Yes
I 10819732	20	A>G	0.4	1	+	3'-UTR	WBGene00016458	C35E7.6	No	Yes	No	No	No	No	No	Yes
I 10819728	21	A>G	0.142857	0.998996	+	3'-UTR	WBGene00016458	C35E7.6	No	Yes	No	No	No	No	No	Yes
I 10819724	21	A>G	0.142857	0.998996	+	3'-UTR	WBGene00016458	C35E7.6	No	Yes	No	No	No	No	No	Yes
I 10819698	21	A>G	0.571429	1	+	3'-UTR	WBGene00016458	C35E7.6	No	Yes	No	No	No	No	No	Yes
I 10819309	8	A>G	0.25	0.997969	+	3'-UTR	WBGene00016458	C35E7.6	No	Yes	No	No	No	No	No	Yes
I 10819307	8	A>G	0.625	1	+	3'-UTR	WBGene00016458	C35E7.6	No	Yes	No	No	No	No	No	Yes
I 10819332	16	A>G	0.5625	1	+	3'-UTR	WBGene00016458	C35E7.6	No	Yes	No	No	No	No	No	Yes
I 10819180	24	A>G	0.541667	1	+	3'-UTR	WBGene00016458	C35E7.6	No	Yes	No	No	No	No	No	Yes
I 10819353	20	A>G	0.4	1	+	3'-UTR	WBGene00016458	C35E7.6	No	Yes	No	No	No	No	No	Yes
I 10819182	24	A>G	0.208333	0.999997	+	3'-UTR	WBGene00016458	C35E7.6	No	Yes	No	No	No	No	No	Yes
I 10819241	15	A>G	0.133333	0.991599	+	3'-UTR	WBGene00016458	C35E7.6	No	Yes	No	No	No	No	No	Yes
I 10819240	15	A>G	0.133333	0.991599	+	3'-UTR	WBGene00016458	C35E7.6	No	Yes	No	No	No	No	No	Yes
I 10819222	17	A>G	0.352941	1	+	3'-UTR	WBGene00016458	C35E7.6	No	Yes	No	No	No	No	No	Yes
I 10819235	17	A>G	0.176471	0.999492	+	3'-UTR	WBGene00016458	C35E7.6	No	Yes	No	No	No	No	No	Yes
I 10819285	10	A>G	0.3	0.99992	+	3'-UTR	WBGene00016458	C35E7.6	No	Yes	No	No	No	No	No	Yes
I 10819281	10	A>G	0.4	0.999999	+	3'-UTR	WBGene00016458	C35E7.6	No	Yes	No	No	No	No	No	Yes
I 10819279	9	A>G	0.666667	1	+	3'-UTR	WBGene00016458	C35E7.6	No	Yes	No	No	No	No	No	Yes
I 10819463	23	A>G	0.913043	1	+	3'-UTR	WBGene00016458	C35E7.6	No	Yes	No	No	No	No	No	Yes
I 3034605	13	A>G	0.538462	1	+	3'-UTR	WBGene00021841	Y54E10BR.2	No	Yes	No	No	No	No	No	Yes
I 10819488	21	A>G	0.142857	0.998996	+	3'-UTR	WBGene00016458	C35E7.6	No	Yes	No	No	No	No	No	Yes
I 10819484	21	A>G	0.761905	1	+	3'-UTR	WBGene00016458	C35E7.6	No	Yes	No	No	No	No	No	Yes
I 10819156	30	A>G	0.3	1	+	3'-UTR	WBGene00016458	C35E7.6	No	Yes	No	No	No	No	No	Yes
I 10819366	21	A>G	0.238095	0.999999	+	3'-UTR	WBGene00016458	C35E7.6	No	Yes	No	No	No	No	No	Yes
I 10819365	21	A>G	0.238095	0.999999	+	3'-UTR	WBGene00016458	C35E7.6	No	Yes	No	No	No	No	No	Yes
I 10819158	30	A>G	0.3	1	+	3'-UTR	WBGene00016458	C35E7.6	No	Yes	No	No	No	No	No	Yes
I 10819361	19	A>G	0.210526	0.999973	+	3'-UTR	WBGene00016458	C35E7.6	No	Yes	No	No	No	No	No	Yes
I 10819417	18	A>G	0.388889	1	+	3'-UTR	WBGene00016458	C35E7.6	No	Yes	No	No	No	No	No	Yes
I 10819400	18	A>G	0.388889	1	+	3'-UTR	WBGene00016458	C35E7.6	No	Yes	No	No	No	No	No	Yes
I 10819393	18	A>G	0.166667	0.999388	+	3'-UTR	WBGene00016458	C35E7.6	No	Yes	No	No	No	No	No	Yes
I 10819392	17	A>G	0.941176	1	+	3'-UTR	WBGene00016458	C35E7.6	No	Yes	No	No	No	No	No	Yes
V 4627782	5	A>G	0.4	0.999408	+	3'-UTR	WBGene00018812	sumv-2	No	Yes	No	No	No	No	No	Yes
I 1358810	6	A>G	0.333333	0.99902	+	3'-UTR	WBGene00022363	Y92H12BL.1	No	Yes	No	No	No	No	No	Yes
V 4627723	5	A>G	0.4	0.999408	+	3'-UTR	WBGene00018812	sumv-2	No	Yes	No	No	No	No	No	Yes
V 4627711	5	A>G	0.4	0.999408	+	3'-UTR	WBGene00018812	sumv-2	No	Yes	No	No	No	No	No	Yes
I 1358809	6	A>G	0.333333	0.99902	+	3'-UTR	WBGene00022363	Y92H12BL.1	No	Yes	No	No	No	No	No	Yes
I 1358787	5	A>G	0.4	0.999408	+	3'-UTR	WBGene00022363	Y92H12BL.1	No	Yes	No	No	No	No	No	Yes
I 2076362	19	A>G	0.421053	1	+	3'-UTR	WBGene00021351	Y37E3.10	No	Yes	No	No	No	No	No	Yes
I 2033888	9	A>G	0.444444	0.999999	+	3'-UTR	WBGene00021237	crtc-1	No	Yes	No	No	No	No	No	Yes
I 2033878	9	A>G	0.666667	1	+	3'-UTR	WBGene00021237	crtc-1	No	Yes	No	No	No	No	No	Yes
I 2076368	21	A>G	0.142857	0.998996	+	3'-UTR	WBGene00021351	Y37E3.10	No	Yes	No	No	No	No	No	Yes
X 1012154	23	A>G	0.565217	1	+	exon	WBGene00023069	rncs-1	No	Yes	No	No	No	No	No	Yes
X 1012162	23	A>G	0.173913	0.999937	+	exon	WBGene00023069	rncs-1	No	Yes	No	No	No	No	No	Yes
X 1012163	23	A>G	0.391304	1	+	exon	WBGene00023069	rncs-1	No	Yes	No	No	No	No	No	Yes
X 1012191	26	A>G	0.230769	1	+	exon	WBGene00023069	rncs-1	No	Yes	No	No	No	No	No	Yes
X 1012205	28	A>G	0.214286	1	+	exon	WBGene00023069	rncs-1	No	Yes	No	No	No	No	No	Yes
X 1012146	26	A>G	0.115385	0.998049	+	exon	WBGene00023069	rncs-1	No	Yes	No	No	No	No	No	Yes
X 1012092	15	A>G	0.466667	1	+	exon	WBGene00023069	rncs-1	No	Yes	No	No	No	No	No	Yes
X 1012045	13	A>G	0.307692	0.999995	+	exon	WBGene00023069	rncs-1	No	Yes	No	No	No	No	No	Yes
X 1012046	13	A>G	0.692308	1	+	exon	WBGene00023069	rncs-1	No	Yes	No	No	No	No	No	Yes
X 1012055	15	A>G	0.2	0.999665	+	exon	WBGene00023069	rncs-1	No	Yes	No	No	No	No	No	Yes
X 1012068	16	A>G	0.125	0.99037	+	exon	WBGene00023069	rncs-1	No	Yes	No	No	No	No	No	Yes
X 1012069	16	A>G	0.125	0.99037	+	exon	WBGene00023069	rncs-1	No	Yes	No	No	No	No	No	Yes
X 1011621	7	A>G	0.428571	0.99998	+	exon	WBGene00023069	rncs-1	No	Yes	No	No	No	No	No	Yes
X 1011585	15	A>G	0.466667	1	+	exon	WBGene00023069	rncs-1	No	Yes	No	No	No	No	No	Yes
X 1011604	12	A>G	0.166667	0.99482	+	exon	WBGene00023069	rncs-1	No	Yes	No	No	No	No	No	Yes
X 1011615	9	A>G	0.222222	0.99731	+	exon	WBGene00023069	rncs-1	No	Yes	No	No	No	No	No	Yes
V 13037228	5	T>C	0.8	1	-	3'-UTR	WBGene00012337	W07G4.3	No	Yes	No	No	No	No	No	Yes
V 13037227	5	T>C	0.4	0.999408	-	3'-UTR	WBGene00012337	W07G4.3	No	Yes	No	No	No	No	No	Yes
V 13037223	5	T>C	0.8	1	-	3'-UTR	WBGene00012337	W07G4.3	No	Yes	No	No	No	No	No	Yes
I 2076629	11	A>G	0.727273	1	+	3'-UTR	WBGene00021351	Y37E3.10	No	Yes	No	No	No	No	No	Yes
I 2076630	11	A>G	0.454545	1	+	3'-UTR	WBGene00021351	Y37E3.10	No	Yes	No	No	No	No	No	Yes
I 2076457	10	A>G	0.2	0.996564	+	3'-UTR	WBGene00021351	Y37E3.10	No	Yes	No	No	No	No	No	Yes
I 2076456	10	A>G	0.7	1	+	3'-UTR	WBGene00021351	Y37E3.10	No	Yes	No	No	No	No	No	Yes
I 2076405	19	A>G	0.526316	1	+	3'-UTR	WBGene00021351	Y37E3.10	No	Yes	No	No	No	No	No	Yes
I 2076409	18	A>G	0.166667	0.999388	+	3'-UTR	WBGene00021351	Y37E3.10	No	Yes	No	No	No	No	No	Yes
I 2076410	19	A>G	0.421053	1	+	3'-UTR	WBGene00021351	Y37E3.10	No	Yes	No	No	No	No	No	Yes
I 2076639	12	A>G	0.333333	0.999997	+	3'-UTR	WBGene00021351	Y37E3.10	No	Yes	No	No	No	No	No	Yes
I 2076644	13	A>G	0.230769	0.999794	+	3'-UTR	WBGene00021351	Y37E3.10	No	Yes	No	No	No	No	No	Yes
I 2076649	14	A>G	0.142857	0.992751	+	3'-UTR	WBGene00021351	Y37E3.10	No	Yes	No	No	No	No	No	Yes
I 2076654	14	A>G	0.285714	0.999993	+	3'-UTR	WBGene00021351	Y37E3.10	No	Yes	No	No	No	No	No	Yes
I 2076655	14	A>G	0.214286	0.999735	+	3'-UTR	WBGene00021351	Y37E3.10	No	Yes	No	No	No	No	No	Yes
I 2076668	14	A>G	0.714286	1	+	3'-UTR	WBGene00021351	Y37E3.10	No	Yes	No	No	No	No	No	Yes
I 2076677	12	A>G	0.333333	0.999997	+	3'-UTR	WBGene00021351	Y37E3.10	No	Yes	No	No	No	No	No	Yes
I 1359367	5	A>G	0.4	0.999408	+	3'-UTR	WBGene00022363	Y92H12BL.1	No	Yes	No	No	No	No	No	Yes
I 2296739	10	A>G	0.5	1	+	3'-UTR	WBGene00021469	Y39G10AR.11	No	Yes	No	No	No	No	No	Yes
I 2296746	9	A>G	0.666667	1	+	3'-UTR	WBGene00021469	Y39G10AR.11	No	Yes	No	No	No	No	No	Yes
I 2296758	9	A>G	0.555556	1	+	3'-UTR	WBGene00021469	Y39G10AR.11	No	Yes	No	No	No	No	No	Yes
I 3034383	6	A>G	0.833333	1	+	3'-UTR	WBGene00021841	Y54E10BR.2	No	Yes	No	No	No	No	No	Yes
I 3034557	5	A>G	0.4	0.999408	+	3'-UTR	WBGene00021841	Y54E10BR.2	No	Yes	No	No	No	No	No	Yes
I 3034567	9	A>G	0.888889	1	+	3'-UTR	WBGene00021841	Y54E10BR.2	No	Yes	No	No	No	No	No	Yes
I 3034568	9	A>G	0.666667	1	+	3'-UTR	WBGene00021841	Y54E10BR.2	No	Yes	No	No	No	No	No	Yes
I 2296759	10	A>G	0.2	0.996564	+	3'-UTR	WBGene00021469	Y39G10AR.11	No	Yes	No	No	No	No	No	Yes
I 2296770	9	A>G	0.222222	0.99731	+	3'-UTR	WBGene00021469	Y39G10AR.11	No	Yes	No	No	No	No	No	Yes
I 2296771	10	A>G	0.3	0.99992	+	3'-UTR	WBGene00021469	Y39G10AR.11	No	Yes	No	No	No	No	No	Yes
I 2296779	10	A>G	0.3	0.99992	+	3'-UTR	WBGene00021469	Y39G10AR.11	No	Yes	No	No	No	No	No	Yes
II 13486035	12	T>C	0.5	1	-	3'-UTR	WBGene00000113	alh-7	No	Yes	No	No	No	No	No	Yes
II 13486036	12	T>C	0.25	0.999845	-	3'-UTR	WBGene00000113	alh-7	No	Yes	No	No	No	No	No	Yes
II 13486047	12	T>C	0.25	0.999845	-	3'-UTR	WBGene00000113	alh-7	No	Yes	No	No	No	No	No	Yes
II 13486054	12	T>C	0.25	0.999845	-	3'-UTR	WBGene00000113	alh-7	No	Yes	No	No	No	No	No	Yes
II 13486675	5	T>C	0.8	1	-	3'-UTR	WBGene00000113	alh-7	No	Yes	No	No	No	No	No	Yes
II 13485922	9	T>C	0.444444	0.999999	-	3'-UTR	WBGene00000113	alh-7	No	Yes	No	No	No	No	No	Yes
II 13485923	9	T>C	0.888889	1	-	3'-UTR	WBGene00000113	alh-7	No	Yes	No	No	No	No	No	Yes
II 13485924	9	T>C	0.888889	1	-	3'-UTR	WBGene00000113	alh-7	No	Yes	No	No	No	No	No	Yes
II 13485948	11	T>C	0.272727	0.999886	-	3'-UTR	WBGene00000113	alh-7	No	Yes	No	No	No	No	No	Yes
II 13485950	11	T>C	0.272727	0.999886	-	3'-UTR	WBGene00000113	alh-7	No	Yes	No	No	No	No	No	Yes
V 3749555	5	T>C	0.6	0.999996	-	3'-UTR	WBGene00021482	Y39H10A.6	No	Yes	No	No	No	No	No	Yes
V 3749998	6	T>C	0.5	0.99999	-	3'-UTR	WBGene00021482	Y39H10A.6	No	Yes	No	No	No	No	No	Yes
V 3749691	5	T>C	0.6	0.999996	-	3'-UTR	WBGene00021482	Y39H10A.6	No	Yes	No	No	No	No	No	Yes
V 3749612	5	T>C	0.4	0.999408	-	3'-UTR	WBGene00021482	Y39H10A.6	No	Yes	No	No	No	No	No	Yes
V 3749622	7	T>C	0.428571	0.99998	-	3'-UTR	WBGene00021482	Y39H10A.6	No	Yes	No	No	No	No	No	Yes
V 3749660	7	T>C	0.714286	1	-	3'-UTR	WBGene00021482	Y39H10A.6	No	Yes	No	No	No	No	No	Yes
V 3749666	7	T>C	0.571429	1	-	3'-UTR	WBGene00021482	Y39H10A.6	No	Yes	No	No	No	No	No	Yes
V 3749686	6	T>C	0.333333	0.99902	-	3'-UTR	WBGene00021482	Y39H10A.6	No	Yes	No	No	No	No	No	Yes
V 3749690	5	T>C	0.8	1	-	3'-UTR	WBGene00021482	Y39H10A.6	No	Yes	No	No	No	No	No	Yes
IV 3110688	5	T>C	0.8	1	-	intron	WBGene00003153	mca-3	No	Yes	No	No	No	No	No	Yes
II 3922541	5	T>C	0.8	1	-	3'-UTR	WBGene00018756	F53C3.13	No	Yes	No	No	No	No	No	Yes
II 5725417	11	T>C	0.181818	0.995734	-	intron	WBGene00004267	rab-3	No	Yes	No	No	No	No	No	Yes
II 5725428	12	T>C	0.166667	0.99482	-	intron	WBGene00004267	rab-3	No	Yes	No	No	No	No	No	Yes
II 5725435	12	T>C	0.166667	0.99482	-	intron	WBGene00004267	rab-3	No	Yes	No	No	No	No	No	Yes
II 5725440	11	T>C	0.181818	0.995734	-	intron	WBGene00004267	rab-3	No	Yes	No	No	No	No	No	Yes
II 5725441	11	T>C	0.181818	0.995734	-	intron	WBGene00004267	rab-3	No	Yes	No	No	No	No	No	Yes
II 5725418	11	T>C	0.181818	0.995734	-	intron	WBGene00004267	rab-3	No	Yes	No	No	No	No	No	Yes
I 2034085	5	A>G	0.6	0.999996	+	3'-UTR	WBGene00021237	crtc-1	No	Yes	No	No	No	No	No	Yes
I 10819971	13	A>G	0.153846	0.993825	+	3'-UTR	WBGene00016458	C35E7.6	No	Yes	No	No	No	No	No	Yes
I 10819994	14	A>G	0.285714	0.999993	+	3'-UTR	WBGene00016458	C35E7.6	No	Yes	No	No	No	No	No	Yes
I 10820009	13	A>G	0.846154	1	+	3'-UTR	WBGene00016458	C35E7.6	No	Yes	No	No	No	No	No	Yes
I 10820016	12	A>G	0.333333	0.999997	+	3'-UTR	WBGene00016458	C35E7.6	No	Yes	No	No	No	No	No	Yes
I 10820035	11	A>G	0.454545	1	+	3'-UTR	WBGene00016458	C35E7.6	No	Yes	No	No	No	No	No	Yes
I 10820036	11	A>G	0.818182	1	+	3'-UTR	WBGene00016458	C35E7.6	No	Yes	No	No	No	No	No	Yes
I 10820086	5	A>G	0.4	0.999408	+	3'-UTR	WBGene00016458	C35E7.6	No	Yes	No	No	No	No	No	Yes
I 10820113	11	A>G	0.181818	0.995734	+	3'-UTR	WBGene00016458	C35E7.6	No	Yes	No	No	No	No	No	Yes
I 10820128	16	A>G	0.25	0.999988	+	3'-UTR	WBGene00016458	C35E7.6	No	Yes	No	No	No	No	No	Yes
I 10820143	14	A>G	0.642857	1	+	3'-UTR	WBGene00016458	C35E7.6	No	Yes	No	No	No	No	No	Yes
I 10820144	15	A>G	0.133333	0.991599	+	3'-UTR	WBGene00016458	C35E7.6	No	Yes	No	No	No	No	No	Yes
I 10820149	13	A>G	0.384615	1	+	3'-UTR	WBGene00016458	C35E7.6	No	Yes	No	No	No	No	No	Yes
I 10820151	13	A>G	0.153846	0.993825	+	3'-UTR	WBGene00016458	C35E7.6	No	Yes	No	No	No	No	No	Yes
I 10820169	13	A>G	0.615385	1	+	3'-UTR	WBGene00016458	C35E7.6	No	Yes	No	No	No	No	No	Yes
I 10820175	13	A>G	0.384615	1	+	3'-UTR	WBGene00016458	C35E7.6	No	Yes	No	No	No	No	No	Yes
I 10820182	14	A>G	0.357143	1	+	3'-UTR	WBGene00016458	C35E7.6	No	Yes	No	No	No	No	No	Yes
I 10820192	16	A>G	0.3125	1	+	3'-UTR	WBGene00016458	C35E7.6	No	Yes	No	No	No	No	No	Yes
I 10820208	15	A>G	0.6	1	+	3'-UTR	WBGene00016458	C35E7.6	No	Yes	No	No	No	No	No	Yes
I 10820209	15	A>G	0.466667	1	+	3'-UTR	WBGene00016458	C35E7.6	No	Yes	No	No	No	No	No	Yes
I 10820210	15	A>G	0.2	0.999665	+	3'-UTR	WBGene00016458	C35E7.6	No	Yes	No	No	No	No	No	Yes
I 10820229	15	A>G	0.466667	1	+	3'-UTR	WBGene00016458	C35E7.6	No	Yes	No	No	No	No	No	Yes
I 10820252	12	A>G	0.416667	1	+	3'-UTR	WBGene00016458	C35E7.6	No	Yes	No	No	No	No	No	Yes
I 10820261	10	A>G	0.3	0.99992	+	3'-UTR	WBGene00016458	C35E7.6	No	Yes	No	No	No	No	No	Yes
I 10820262	10	A>G	0.2	0.996564	+	3'-UTR	WBGene00016458	C35E7.6	No	Yes	No	No	No	No	No	Yes
I 10820274	6	A>G	0.333333	0.99902	+	3'-UTR	WBGene00016458	C35E7.6	No	Yes	No	No	No	No	No	Yes
I 10820404	7	A>G	0.285714	0.99854	+	3'-UTR	WBGene00016458	C35E7.6	No	Yes	No	No	No	No	No	Yes
I 10820406	7	A>G	0.285714	0.99854	+	3'-UTR	WBGene00016458	C35E7.6	No	Yes	No	No	No	No	No	Yes
I 10820412	8	A>G	0.25	0.997969	+	3'-UTR	WBGene00016458	C35E7.6	No	Yes	No	No	No	No	No	Yes
I 10820413	8	A>G	0.375	0.999966	+	3'-UTR	WBGene00016458	C35E7.6	No	Yes	No	No	No	No	No	Yes
I 10820428	9	A>G	0.444444	0.999999	+	3'-UTR	WBGene00016458	C35E7.6	No	Yes	No	No	No	No	No	Yes
I 10820455	14	A>G	0.214286	0.999735	+	3'-UTR	WBGene00016458	C35E7.6	No	Yes	No	No	No	No	No	Yes
I 10820478	14	A>G	0.285714	0.999993	+	3'-UTR	WBGene00016458	C35E7.6	No	Yes	No	No	No	No	No	Yes
II 3211189	7	A>G	0.285714	0.99854	+	5'-UTR	WBGene00022568	ZC239.5	No	Yes	No	No	No	No	No	Yes
II 5725312	13	A>G	0.153846	0.993825	+	intergenic	intergenic	#N/A	No	Yes	No	No	No	No	No	Yes
III 850851	10	A>G	0.2	0.996564	+	3'-UTR	WBGene00019326	K02F3.2	No	Yes	No	No	No	No	No	Yes
V 2646819	7	A>G	0.428571	0.99998	+	3'-UTR	WBGene00020957	W02H5.2	No	Yes	No	No	No	No	No	Yes
V 2646820	7	A>G	0.571429	1	+	3'-UTR	WBGene00020957	W02H5.2	No	Yes	No	No	No	No	No	Yes
I 1347108	5	T>C	0.6	0.999996	-	intergenic	intergenic	#N/A	No	Yes	No	No	No	No	No	Yes
I 1347117	5	T>C	0.8	1	-	intergenic	intergenic	#N/A	No	Yes	No	No	No	No	No	Yes
I 1347118	5	T>C	0.8	1	-	intergenic	intergenic	#N/A	No	Yes	No	No	No	No	No	Yes
I 1347129	5	T>C	0.4	0.999408	-	intergenic	intergenic	#N/A	No	Yes	No	No	No	No	No	Yes
I 1347216	7	T>C	0.285714	0.99854	-	intergenic	intergenic	#N/A	No	Yes	No	No	No	No	No	Yes
I 1347228	7	T>C	0.428571	0.99998	-	intergenic	intergenic	#N/A	No	Yes	No	No	No	No	No	Yes
I 1347229	7	T>C	0.285714	0.99854	-	intergenic	intergenic	#N/A	No	Yes	No	No	No	No	No	Yes
I 11924698	5	T>C	0.8	1	-	3'-UTR	WBGene00006958	wve-1	No	Yes	No	No	No	No	No	Yes
I 11924699	5	T>C	0.6	0.999996	-	3'-UTR	WBGene00006958	wve-1	No	Yes	No	No	No	No	No	Yes
II 10844224	8	T>C	0.25	0.997969	-	3'-UTR	WBGene00010910	M106.2	No	Yes	No	No	No	No	No	Yes
IV 13408516	5	T>C	0.4	0.999408	-	3'-UTR	WBGene00013382	gcl-1	No	Yes	No	No	No	No	No	Yes
V 950652	6	T>C	0.833333	1	-	3'-UTR	WBGene00005024	sqv-6	No	Yes	No	No	No	No	No	Yes
V 950722	8	T>C	0.25	0.997969	-	3'-UTR	WBGene00005024	sqv-6	No	Yes	No	No	No	No	No	Yes
V 19926841	14	T>C	0.142857	0.992751	-	3'-UTR	WBGene00013362	Y60A3A.14	No	Yes	No	No	No	No	No	Yes
V 19926917	10	T>C	0.5	1	-	3'-UTR	WBGene00013362	Y60A3A.14	No	Yes	No	No	No	No	No	Yes
V 19926934	8	T>C	0.875	1	-	3'-UTR	WBGene00013362	Y60A3A.14	No	Yes	No	No	No	No	No	Yes
V 19926947	7	T>C	0.285714	0.99854	-	3'-UTR	WBGene00013362	Y60A3A.14	No	Yes	No	No	No	No	No	Yes
V 19927317	7	T>C	0.714286	1	-	3'-UTR	WBGene00013362	Y60A3A.14	No	Yes	No	No	No	No	No	Yes
V 19927318	7	T>C	0.571429	1	-	3'-UTR	WBGene00013362	Y60A3A.14	No	Yes	No	No	No	No	No	Yes
V 19927322	7	T>C	0.857143	1	-	3'-UTR	WBGene00013362	Y60A3A.14	No	Yes	No	No	No	No	No	Yes
V 19927323	7	T>C	0.714286	1	-	3'-UTR	WBGene00013362	Y60A3A.14	No	Yes	No	No	No	No	No	Yes
V 19927342	9	T>C	0.333333	0.999946	-	3'-UTR	WBGene00013362	Y60A3A.14	No	Yes	No	No	No	No	No	Yes
V 19927376	8	T>C	0.25	0.997969	-	3'-UTR	WBGene00013362	Y60A3A.14	No	Yes	No	No	No	No	No	Yes
V 19927417	9	T>C	0.555556	1	-	3'-UTR	WBGene00013362	Y60A3A.14	No	Yes	No	No	No	No	No	Yes
IV 13408513	5	T>C	0.6	0.999996	-	3'-UTR	WBGene00013382	gcl-1	No	Yes	No	No	Yes	No	No	Yes
I 630413	14	T>C	0.428571	1	-	3'-UTR	WBGene00022029	Y65B4A.6	No	Yes	Yes	No	Yes	Washburn et al,2014	Yes	Yes
I 630442	13	T>C	0.692308	1	-	3'-UTR	WBGene00022029	Y65B4A.6	No	Yes	Yes	No	Yes	No	Yes	Yes
I 630412	14	T>C	0.285714	0.999993	-	3'-UTR	WBGene00022029	Y65B4A.6	No	Yes	Yes	No	Yes	No	Yes	Yes
I 1155210	14	T>C	0.142857	0.992751	-	3'-UTR	WBGene00000165	aps-3	No	Yes	No	No	Yes	Washburn et al,2014	No	Yes
I 1155207	15	T>C	0.133333	0.991599	-	3'-UTR	WBGene00000165	aps-3	No	Yes	No	No	Yes	No	No	Yes
I 1155197	18	T>C	0.444444	1	-	3'-UTR	WBGene00000165	aps-3	No	Yes	Yes	No	Yes	Washburn et al,2014	No	Yes
I 1155134	21	T>C	0.285714	1	-	3'-UTR	WBGene00000165	aps-3	No	Yes	No	No	Yes	Washburn et al,2014	No	Yes
I 1155107	21	T>C	0.285714	1	-	3'-UTR	WBGene00000165	aps-3	No	Yes	No	No	Yes	No	No	Yes
I 1154606	19	T>C	0.684211	1	-	3'-UTR	WBGene00000165	aps-3	No	Yes	No	No	Yes	Washburn et al,2014	No	Yes
I 630997	9	T>C	0.333333	0.999946	-	3'-UTR	WBGene00022029	Y65B4A.6	No	Yes	No	No	Yes	Washburn et al,2014	No	Yes
I 630458	14	T>C	0.285714	0.999993	-	3'-UTR	WBGene00022029	Y65B4A.6	No	Yes	No	No	Yes	No	No	Yes
I 1154711	16	T>C	0.5	1	-	3'-UTR	WBGene00000165	aps-3	No	Yes	No	No	Yes	No	No	Yes
I 1154651	23	T>C	0.391304	1	-	3'-UTR	WBGene00000165	aps-3	No	Yes	No	No	Yes	No	No	Yes
I 1154674	27	T>C	0.296296	1	-	3'-UTR	WBGene00000165	aps-3	No	Yes	No	No	Yes	No	No	Yes
V 13135855	6	T>C	0.5	0.99999	-	3'-UTR	WBGene00007153	clec-41	No	Yes	No	No	Yes	No	No	Yes
I 2296703	9	A>G	0.777778	1	+	3'-UTR	WBGene00021469	Y39G10AR.11	No	Yes	No	No	Yes	No	No	Yes
I 10819596	22	A>G	0.136364	0.998838	+	3'-UTR	WBGene00016458	C35E7.6	No	Yes	No	No	Yes	No	No	Yes
I 10819586	22	A>G	0.136364	0.998838	+	3'-UTR	WBGene00016458	C35E7.6	No	Yes	No	No	Yes	No	No	Yes
I 10819622	19	A>G	0.157895	0.999271	+	3'-UTR	WBGene00016458	C35E7.6	No	Yes	Yes	No	Yes	No	No	Yes
I 10819544	20	A>G	0.15	0.999141	+	3'-UTR	WBGene00016458	C35E7.6	No	Yes	Yes	No	Yes	No	No	Yes
I 10819533	20	A>G	0.15	0.999141	+	3'-UTR	WBGene00016458	C35E7.6	No	Yes	Yes	No	Yes	No	No	Yes
I 10819522	20	A>G	0.15	0.999141	+	3'-UTR	WBGene00016458	C35E7.6	No	Yes	No	No	Yes	No	No	Yes
I 10819519	19	A>G	0.263158	0.999999	+	3'-UTR	WBGene00016458	C35E7.6	No	Yes	No	No	Yes	No	No	Yes
I 10819584	21	A>G	0.333333	1	+	3'-UTR	WBGene00016458	C35E7.6	No	Yes	No	No	Yes	No	No	Yes
I 10819580	19	A>G	0.684211	1	+	3'-UTR	WBGene00016458	C35E7.6	No	Yes	No	No	Yes	No	No	Yes
I 10819565	22	A>G	0.5	1	+	3'-UTR	WBGene00016458	C35E7.6	No	Yes	No	No	Yes	No	No	Yes
I 10819656	20	A>G	0.9	1	+	3'-UTR	WBGene00016458	C35E7.6	No	Yes	No	No	Yes	No	No	Yes
I 10819760	20	A>G	0.25	0.999999	+	3'-UTR	WBGene00016458	C35E7.6	No	Yes	No	No	Yes	No	No	Yes
I 10819330	14	A>G	0.285714	0.999993	+	3'-UTR	WBGene00016458	C35E7.6	No	Yes	No	No	Yes	No	No	Yes
I 10819194	18	A>G	0.5	1	+	3'-UTR	WBGene00016458	C35E7.6	No	Yes	Yes	No	No	No	No	Yes
I 10819300	7	A>G	0.428571	0.99998	+	3'-UTR	WBGene00016458	C35E7.6	No	Yes	No	No	Yes	No	No	Yes
I 10819355	18	A>G	0.166667	0.999388	+	3'-UTR	WBGene00016458	C35E7.6	No	Yes	No	No	Yes	No	No	Yes
I 10819354	18	A>G	0.333333	1	+	3'-UTR	WBGene00016458	C35E7.6	No	Yes	Yes	No	Yes	No	No	Yes
I 10819352	20	A>G	0.25	0.999999	+	3'-UTR	WBGene00016458	C35E7.6	No	Yes	No	No	Yes	No	No	Yes
I 10819299	6	A>G	0.666667	1	+	3'-UTR	WBGene00016458	C35E7.6	No	Yes	No	No	Yes	No	No	Yes
I 10819207	16	A>G	0.25	0.999988	+	3'-UTR	WBGene00016458	C35E7.6	No	Yes	No	No	Yes	No	No	Yes
I 10819273	10	A>G	0.3	0.99992	+	3'-UTR	WBGene00016458	C35E7.6	No	Yes	No	No	Yes	No	No	Yes
I 10819293	8	A>G	0.375	0.999966	+	3'-UTR	WBGene00016458	C35E7.6	No	Yes	No	No	Yes	No	No	Yes
I 10819287	9	A>G	0.777778	1	+	3'-UTR	WBGene00016458	C35E7.6	No	Yes	No	No	Yes	No	No	Yes
I 10819197	18	A>G	0.611111	1	+	3'-UTR	WBGene00016458	C35E7.6	No	Yes	No	No	Yes	No	No	Yes
I 10819198	18	A>G	0.277778	0.999999	+	3'-UTR	WBGene00016458	C35E7.6	No	Yes	Yes	No	Yes	No	Yes	Yes
I 10819199	18	A>G	0.166667	0.999388	+	3'-UTR	WBGene00016458	C35E7.6	No	Yes	No	No	Yes	No	No	Yes
I 10819473	20	A>G	0.55	1	+	3'-UTR	WBGene00016458	C35E7.6	No	Yes	Yes	No	Yes	No	No	Yes
I 10819485	21	A>G	0.380952	1	+	3'-UTR	WBGene00016458	C35E7.6	No	Yes	Yes	No	Yes	No	No	Yes
I 10819385	21	A>G	0.52381	1	+	3'-UTR	WBGene00016458	C35E7.6	No	Yes	No	No	Yes	No	No	Yes
I 10819391	18	A>G	0.5	1	+	3'-UTR	WBGene00016458	C35E7.6	No	Yes	No	No	Yes	No	No	Yes
V 4628304	6	A>G	0.5	0.99999	+	3'-UTR	WBGene00018812	sumv-2	No	Yes	Yes	No	Yes	Washburn at al,2014	Yes	Yes
V 4627784	5	A>G	0.4	0.999408	+	3'-UTR	WBGene00018812	sumv-2	No	Yes	Yes	No	Yes	No	No	Yes
I 1358771	5	A>G	0.4	0.999408	+	3'-UTR	WBGene00022363	Y92H12BL.1	No	Yes	Yes	No	Yes	No	No	Yes
I 10819232	17	A>G	0.176471	0.999492	+	3'-UTR	WBGene00016458	C35E7.6	No	Yes	No	No	Yes	No	No	Yes
IV 1201518	8	A>G	0.25	0.997969	+	3'-UTR	WBGene00022427	Y104H12D.3	No	Yes	Yes	No	Yes	No	Yes	Yes
I 2076364	20	A>G	0.85	1	+	3'-UTR	WBGene00021351	Y37E3.10	No	Yes	No	No	Yes	No	No	Yes
X 1012176	22	A>G	0.454545	1	+	exon	WBGene00023069	rncs-1	No	Yes	No	No	Yes	Washburn at al,2014	No	Yes
X 1012200	29	A>G	0.103448	0.997283	+	exon	WBGene00023069	rncs-1	No	Yes	No	No	Yes	No	No	Yes
X 1011622	6	A>G	0.833333	1	+	exon	WBGene00023069	rncs-1	No	Yes	No	No	Yes	No	No	Yes
X 1011631	5	A>G	0.4	0.999408	+	exon	WBGene00023069	rncs-1	No	Yes	No	No	Yes	No	No	Yes
X 1011988	11	A>G	0.181818	0.995734	+	exon	WBGene00023069	rncs-1	No	Yes	No	No	Yes	No	No	Yes
X 1011610	10	A>G	0.4	0.999999	+	exon	WBGene00023069	rncs-1	No	Yes	No	No	Yes	No	No	Yes
X 1011611	10	A>G	0.5	1	+	exon	WBGene00023069	rncs-1	No	Yes	No	No	Yes	No	No	Yes
V 13037090	9	T>C	0.555556	1	-	3'-UTR	WBGene00012337	W07G4.3	No	Yes	Yes	No	No	No	No	Yes
V 13037089	9	T>C	0.777778	1	-	3'-UTR	WBGene00012337	W07G4.3	No	Yes	No	No	Yes	No	No	Yes
V 13037098	9	T>C	0.222222	0.99731	-	3'-UTR	WBGene00012337	W07G4.3	No	Yes	Yes	No	Yes	No	No	Yes
V 13037104	9	T>C	0.888889	1	-	3'-UTR	WBGene00012337	W07G4.3	No	Yes	Yes	No	No	No	No	Yes
I 2076467	11	A>G	0.363636	0.999998	+	3'-UTR	WBGene00021351	Y37E3.10	No	Yes	No	No	Yes	No	No	Yes
I 2076482	8	A>G	0.25	0.997969	+	3'-UTR	WBGene00021351	Y37E3.10	No	Yes	No	No	Yes	No	No	Yes
I 2076609	10	A>G	0.5	1	+	3'-UTR	WBGene00021351	Y37E3.10	No	Yes	No	No	Yes	No	No	Yes
I 2076610	10	A>G	0.8	1	+	3'-UTR	WBGene00021351	Y37E3.10	No	Yes	Yes	No	Yes	No	No	Yes
I 2076411	19	A>G	0.368421	1	+	3'-UTR	WBGene00021351	Y37E3.10	No	Yes	No	No	Yes	No	No	Yes
I 2076643	13	A>G	0.615385	1	+	3'-UTR	WBGene00021351	Y37E3.10	No	Yes	Yes	No	Yes	No	No	Yes
I 2076645	13	A>G	0.230769	0.999794	+	3'-UTR	WBGene00021351	Y37E3.10	No	Yes	No	No	Yes	No	No	Yes
I 2076648	14	A>G	0.142857	0.992751	+	3'-UTR	WBGene00021351	Y37E3.10	No	Yes	Yes	No	Yes	No	No	Yes
I 3034569	9	A>G	0.888889	1	+	3'-UTR	WBGene00021841	Y54E10BR.2	No	Yes	No	No	Yes	No	No	Yes
II 13486388	6	T>C	0.5	0.99999	-	3'-UTR	WBGene00000113	alh-7	No	Yes	Yes	No	Yes	No	No	Yes
II 13486678	5	T>C	0.4	0.999408	-	3'-UTR	WBGene00000113	alh-7	No	Yes	Yes	No	Yes	No	No	Yes
II 13485940	10	T>C	0.8	1	-	3'-UTR	WBGene00000113	alh-7	No	Yes	Yes	No	Yes	No	No	Yes
II 13485951	11	T>C	0.454545	1	-	3'-UTR	WBGene00000113	alh-7	No	Yes	Yes	No	Yes	No	No	Yes
II 13485956	11	T>C	0.454545	1	-	3'-UTR	WBGene00000113	alh-7	No	Yes	Yes	No	Yes	No	No	Yes
V 3749530	8	T>C	0.25	0.997969	-	3'-UTR	WBGene00021482	Y39H10A.6	No	Yes	No	No	Yes	No	No	Yes
V 3749543	6	T>C	0.666667	1	-	3'-UTR	WBGene00021482	Y39H10A.6	No	Yes	No	No	Yes	No	No	Yes
I 10819998	14	A>G	0.5	1	+	3'-UTR	WBGene00016458	C35E7.6	No	Yes	No	No	Yes	No	No	Yes
I 10820008	13	A>G	0.692308	1	+	3'-UTR	WBGene00016458	C35E7.6	No	Yes	No	No	Yes	No	No	Yes
I 10820012	14	A>G	0.214286	0.999735	+	3'-UTR	WBGene00016458	C35E7.6	No	Yes	No	No	Yes	No	No	Yes
I 10820093	7	A>G	0.285714	0.99854	+	3'-UTR	WBGene00016458	C35E7.6	No	Yes	No	No	Yes	No	No	Yes
I 10820114	13	A>G	0.307692	0.999995	+	3'-UTR	WBGene00016458	C35E7.6	No	Yes	No	No	Yes	No	No	Yes
I 10820152	13	A>G	0.307692	0.999995	+	3'-UTR	WBGene00016458	C35E7.6	No	Yes	No	No	Yes	No	No	Yes
I 10820181	13	A>G	0.461538	1	+	3'-UTR	WBGene00016458	C35E7.6	No	Yes	Yes	No	Yes	No	No	Yes
I 10820189	15	A>G	0.333333	1	+	3'-UTR	WBGene00016458	C35E7.6	No	Yes	No	No	Yes	No	No	Yes
I 10820191	15	A>G	0.2	0.999665	+	3'-UTR	WBGene00016458	C35E7.6	No	Yes	No	No	Yes	No	No	Yes
I 10820215	14	A>G	0.642857	1	+	3'-UTR	WBGene00016458	C35E7.6	No	Yes	No	No	Yes	No	No	Yes
I 10820251	12	A>G	0.75	1	+	3'-UTR	WBGene00016458	C35E7.6	No	Yes	No	No	Yes	No	No	Yes
I 10820257	12	A>G	0.166667	0.99482	+	3'-UTR	WBGene00016458	C35E7.6	No	Yes	No	No	Yes	No	No	Yes
I 10820264	9	A>G	0.444444	0.999999	+	3'-UTR	WBGene00016458	C35E7.6	No	Yes	Yes	No	Yes	No	No	Yes
I 10820275	6	A>G	0.333333	0.99902	+	3'-UTR	WBGene00016458	C35E7.6	No	Yes	Yes	No	Yes	No	No	Yes
I 10820418	8	A>G	0.875	1	+	3'-UTR	WBGene00016458	C35E7.6	No	Yes	No	No	Yes	No	No	Yes
I 10820419	8	A>G	0.625	1	+	3'-UTR	WBGene00016458	C35E7.6	No	Yes	No	No	Yes	No	No	Yes
I 10820462	11	A>G	0.272727	0.999886	+	3'-UTR	WBGene00016458	C35E7.6	No	Yes	Yes	No	Yes	No	No	Yes
I 10820475	12	A>G	0.666667	1	+	3'-UTR	WBGene00016458	C35E7.6	No	Yes	No	No	Yes	No	No	Yes
I 10820476	12	A>G	0.916667	1	+	3'-UTR	WBGene00016458	C35E7.6	No	Yes	No	No	Yes	No	No	Yes
I 10820486	15	A>G	0.866667	1	+	3'-UTR	WBGene00016458	C35E7.6	No	Yes	Yes	No	Yes	No	No	Yes
I 10820499	15	A>G	0.666667	1	+	3'-UTR	WBGene00016458	C35E7.6	No	Yes	Yes	No	Yes	No	No	Yes
I 10820508	15	A>G	0.2	0.999665	+	3'-UTR	WBGene00016458	C35E7.6	No	Yes	Yes	No	Yes	No	No	Yes
V 2646595	5	A>G	0.8	1	+	3'-UTR	WBGene00020957	W02H5.2	No	Yes	Yes	No	Yes	No	Yes	Yes
V 2646810	7	A>G	0.285714	0.99854	+	3'-UTR	WBGene00020957	W02H5.2	No	Yes	No	No	Yes	No	No	Yes
I 1347138	5	T>C	0.4	0.999408	-	intergenic	intergenic	#N/A	No	Yes	Yes	No	Yes	No	No	Yes
I 1347145	5	T>C	0.4	0.999408	-	intergenic	intergenic	#N/A	No	Yes	Yes	No	Yes	No	No	Yes
I 1347605	5	T>C	0.6	0.999996	-	intergenic	intergenic	#N/A	No	Yes	No	No	Yes	No	No	Yes
V 950615	6	T>C	0.333333	0.99902	-	3'-UTR	WBGene00005024	sqv-6	No	Yes	Yes	No	No	No	No	Yes
V 950616	6	T>C	0.333333	0.99902	-	3'-UTR	WBGene00005024	sqv-6	No	Yes	Yes	No	No	No	No	Yes
V 950761	6	T>C	0.833333	1	-	3'-UTR	WBGene00005024	sqv-6	No	Yes	Yes	No	Yes	No	No	Yes
V 19926805	12	T>C	0.25	0.999845	-	3'-UTR	WBGene00013362	Y60A3A.14	No	Yes	Yes	No	Yes	No	No	Yes
V 19927414	9	T>C	0.444444	0.999999	-	3'-UTR	WBGene00013362	Y60A3A.14	No	Yes	Yes	No	Yes	No	No	Yes
