# Supplementary material for: Profiling neural editomes reveals a molecular mechanism to regulate RNA editing during development
Source: HighWire-hosted journal article supplement (doi:10.1101/gr.267575.120), 2020-12-18
Supplement: Supplemental_Table_S3.xlsx [file Supplemental_Table_S3.xlsx]

## Sheet: L1 re-analysis
Supplemental Table 3: De novo identification of editing sites by re-analyzing L1 neural RNA seq (related to Fig. 2B). The RNA-seq reads from isolated L1 neural cells were re-analyzed by SAILOR, a previously published software program that predicts A-to-I editing sites (Deffit et al. 2017). High confidence editing sites (>0.99 confidence, > 5 reads per site) identified in L1 wild-type dataset are …
Chromosomal position	coverage	conf	strand	feature	wbID	Gene Name
IV 10170144	22|T>C|0.136363636	0.998838	-	CDS	WBGene00004254	pxf-1
IV 7598559	12|A>G|0.166666667	0.99482	+	CDS	WBGene00018468	tag-80
IV 7597400	12|A>G|0.25	0.999845	+	CDS	WBGene00018468	tag-80
IV 7598537	10|A>G|0.7	1	+	CDS	WBGene00018468	tag-80
V 6440779	10|T>C|0.2	0.996564	-	CDS	WBGene00020276	T05H4.15
V 6172875	5|T>C|0.4	0.999408	-	CDS	WBGene00006436	ttn-1
V 7439475	54|A>G|0.111111111	0.999985	+	CDS	WBGene00017792	F25E5.16
X 58852	7|A>G|0.857142857	1	+	intergenic	intergenic	#N/A
X 58851	7|A>G|0.857142857	1	+	intergenic	intergenic	#N/A
IV 11226065	16|A>G|0.125	0.99037	+	CDS	WBGene00000699	col-125
III 13390941	11|T>C|0.181818182	0.995734	-	CDS	WBGene00001035	dnj-17
X 6784062	9|A>G|0.222222222	0.99731	+	CDS	WBGene00019226	H22K11.3
I 14855621	75|T>C|0.12	1	-	CDS	WBGene00000088	aex-5
I 14855616	77|T>C|0.051948052	0.992752	-	CDS	WBGene00000088	aex-5
I 14855620	74|T>C|0.121621622	1	-	CDS	WBGene00000088	aex-5
I 14855647	75|T>C|0.053333333	0.993398	-	CDS	WBGene00000088	aex-5
I 14855638	75|T>C|0.053333333	0.993398	-	CDS	WBGene00000088	aex-5
I 14855641	75|T>C|0.133333333	1	-	CDS	WBGene00000088	aex-5
I 14855642	75|T>C|0.106666667	0.999999	-	CDS	WBGene00000088	aex-5
I 14855592	64|T>C|0.0625	0.996274	-	CDS	WBGene00000088	aex-5
I 14855586	65|T>C|0.076923077	0.999533	-	CDS	WBGene00000088	aex-5
I 14855727	68|T>C|0.205882353	1	-	CDS	WBGene00000088	aex-5
I 14855728	67|T>C|0.104477612	0.999995	-	CDS	WBGene00000088	aex-5
I 14855723	68|T>C|0.382352941	1	-	CDS	WBGene00000088	aex-5
I 14855689	79|T>C|0.151898734	1	-	CDS	WBGene00000088	aex-5
I 14855722	69|T>C|0.057971014	0.995102	-	CDS	WBGene00000088	aex-5
I 14855678	79|T>C|0.253164557	1	-	CDS	WBGene00000088	aex-5
I 14855679	80|T>C|0.2625	1	-	CDS	WBGene00000088	aex-5
V 18242853	10|T>C|0.2	0.996564	-	CDS	WBGene00011207	R10E8.1
X 6601574	7|T>C|0.428571429	0.99998	-	CDS	WBGene00044574	F23G4.1
X 6601570	7|T>C|0.285714286	0.99854	-	CDS	WBGene00044574	F23G4.1
X 6601566	6|T>C|0.666666667	1	-	CDS	WBGene00044574	F23G4.1
X 6601575	7|T>C|0.571428571	1	-	CDS	WBGene00044574	F23G4.1
X 6601578	8|T>C|0.25	0.997969	-	CDS	WBGene00044574	F23G4.1
I 11013370	6|A>G|0.5	0.99999	+	CDS	WBGene00077539	Y52B11A.12
I 11013760	9|A>G|0.666666667	1	+	CDS	WBGene00077539	Y52B11A.12
I 11013690	9|A>G|0.222222222	0.99731	+	CDS	WBGene00077539	Y52B11A.12
I 11013811	9|A>G|0.333333333	0.999946	+	CDS	WBGene00077539	Y52B11A.12
I 11013157	9|A>G|0.444444444	0.999999	+	CDS	WBGene00077539	Y52B11A.12
X 3686967	14|T>C|0.142857143	0.992751	-	CDS	WBGene00015356	tag-278
II 1127698	10|A>G|0.2	0.996564	+	CDS	WBGene00021103	eri-3
X 6601598	15|T>C|0.133333333	0.991599	-	CDS	WBGene00044574	F23G4.1
III 1574858	11|A>G|0.181818182	0.995734	+	intron	WBGene00022051	rep-1
III 1574840	11|A>G|0.181818182	0.995734	+	intron	WBGene00022051	rep-1
III 1574857	11|A>G|0.181818182	0.995734	+	intron	WBGene00022051	rep-1
II 3321904	14|T>C|0.142857143	0.992751	-	CDS	WBGene00021590	Y46D2A.2
II 3321908	14|T>C|0.142857143	0.992751	-	CDS	WBGene00021590	Y46D2A.2
II 3321932	15|T>C|0.133333333	0.991599	-	CDS	WBGene00021590	Y46D2A.2
II 3321911	14|T>C|0.142857143	0.992751	-	CDS	WBGene00021590	Y46D2A.2
II 3321912	15|T>C|0.133333333	0.991599	-	CDS	WBGene00021590	Y46D2A.2
II 2183289	9|T>C|0.222222222	0.99731	-	CDS	WBGene00016340	gba-2
II 2183260	8|T>C|0.25	0.997969	-	CDS	WBGene00016340	gba-2
II 2183273	9|T>C|0.222222222	0.99731	-	CDS	WBGene00016340	gba-2
MtDNA 8429	93|A>G|0.989247312	1	+	CDS	WBGene00010964	ctc-1
V 8855267	27|T>C|0.518518519	1	-	CDS	WBGene00017190	F07B7.12
V 8855268	28|T>C|0.178571429	0.999993	-	CDS	WBGene00017190	F07B7.12
V 4219653	28|A>G|0.107142857	0.997556	+	five_prime_utr	WBGene00003747	nlp-9
II 14346359	12|T>C|0.333333333	0.999997	-	five_prime_utr	WBGene00013218	Y54G11A.9
II 14346329	9|T>C|0.444444444	0.999999	-	five_prime_utr	WBGene00013218	Y54G11A.9
IV 203515	8|A>G|0.375	0.999966	+	five_prime_utr	WBGene00044736	gfrp-1
I 12809636	13|T>C|0.307692308	0.999995	-	five_prime_utr	WBGene00012475	Y18D10A.2
I 12809635	13|T>C|0.230769231	0.999794	-	five_prime_utr	WBGene00012475	Y18D10A.2
I 12809600	10|T>C|0.3	0.99992	-	five_prime_utr	WBGene00012475	Y18D10A.2
I 12809603	10|T>C|0.5	1	-	five_prime_utr	WBGene00012475	Y18D10A.2
I 12809615	11|T>C|0.272727273	0.999886	-	five_prime_utr	WBGene00012475	Y18D10A.2
I 12809616	11|T>C|0.818181818	1	-	five_prime_utr	WBGene00012475	Y18D10A.2
I 14855738	61|T>C|0.163934426	1	-	five_prime_utr	WBGene00000088	aex-5
I 14855737	62|T>C|0.177419355	1	-	five_prime_utr	WBGene00000088	aex-5
I 14855736	63|T>C|0.111111111	0.999997	-	five_prime_utr	WBGene00000088	aex-5
I 14855742	55|T>C|0.363636364	1	-	five_prime_utr	WBGene00000088	aex-5
I 14855743	55|T>C|0.218181818	1	-	five_prime_utr	WBGene00000088	aex-5
I 14855776	41|T>C|0.097560976	0.999314	-	five_prime_utr	WBGene00000088	aex-5
I 14855775	42|T>C|0.095238095	0.999246	-	five_prime_utr	WBGene00000088	aex-5
I 14855754	51|T>C|0.078431373	0.998404	-	five_prime_utr	WBGene00000088	aex-5
I 14855747	55|T>C|0.254545455	1	-	five_prime_utr	WBGene00000088	aex-5
I 14855746	54|T>C|0.240740741	1	-	five_prime_utr	WBGene00000088	aex-5
V 17870645	15|T>C|0.133333333	0.991599	-	five_prime_utr	WBGene00000813	csn-1
I 14855818	40|T>C|0.075	0.993014	-	five_prime_utr	WBGene00000088	aex-5
I 14855795	42|T>C|0.404761905	1	-	five_prime_utr	WBGene00000088	aex-5
I 14855793	42|T>C|0.142857143	0.999997	-	five_prime_utr	WBGene00000088	aex-5
I 14855790	43|T>C|0.093023256	0.999174	-	five_prime_utr	WBGene00000088	aex-5
I 14855784	40|T>C|0.15	0.999998	-	five_prime_utr	WBGene00000088	aex-5
I 14855778	39|T>C|0.179487179	1	-	five_prime_utr	WBGene00000088	aex-5
I 14855794	43|T>C|0.209302326	1	-	five_prime_utr	WBGene00000088	aex-5
V 5581406	7|T>C|0.857142857	1	-	five_prime_utr	WBGene00002215	klc-2
I 12809653	13|T>C|0.461538462	1	-	five_prime_utr	WBGene00012475	Y18D10A.2
I 12809651	13|T>C|0.692307692	1	-	five_prime_utr	WBGene00012475	Y18D10A.2
I 12809652	13|T>C|0.384615385	1	-	five_prime_utr	WBGene00012475	Y18D10A.2
I 12809667	13|T>C|0.307692308	0.999995	-	five_prime_utr	WBGene00012475	Y18D10A.2
I 12809645	13|T>C|0.230769231	0.999794	-	five_prime_utr	WBGene00012475	Y18D10A.2
I 12809646	13|T>C|0.307692308	0.999995	-	five_prime_utr	WBGene00012475	Y18D10A.2
V 13135049	15|T>C|0.133333333	0.991599	-	three_prime_utr	WBGene00007153	clec-41
III 12697763	12|A>G|0.166666667	0.99482	+	three_prime_utr	WBGene00013739	spin-4
III 12697766	11|A>G|0.181818182	0.995734	+	three_prime_utr	WBGene00013739	spin-4
V 9982676	12|A>G|0.166666667	0.99482	+	three_prime_utr	WBGene00007785	tofu-1
V 13135043	15|T>C|0.333333333	1	-	three_prime_utr	WBGene00007153	clec-41
I 1155283	38|T>C|0.421052632	1	-	three_prime_utr	WBGene00000165	aps-3
III 12159718	10|A>G|0.5	1	+	three_prime_utr	WBGene00013544	Y75B8A.7
III 12697739	11|A>G|0.181818182	0.995734	+	three_prime_utr	WBGene00013739	spin-4
III 12697735	11|A>G|0.363636364	0.999998	+	three_prime_utr	WBGene00013739	spin-4
V 13135042	15|T>C|0.333333333	1	-	three_prime_utr	WBGene00007153	clec-41
IV 13408608	16|T>C|0.5	1	-	three_prime_utr	WBGene00013382	gcl-1
III 12623395	29|A>G|0.172413793	0.999992	+	three_prime_utr	WBGene00013735	Y111B2A.12
III 12623363	21|A>G|0.19047619	0.999957	+	three_prime_utr	WBGene00013735	Y111B2A.12
III 12697770	11|A>G|0.727272727	1	+	three_prime_utr	WBGene00013739	spin-4
IV 13408653	17|T>C|0.176470588	0.999492	-	three_prime_utr	WBGene00013382	gcl-1
III 12623386	26|A>G|0.115384615	0.998049	+	three_prime_utr	WBGene00013735	Y111B2A.12
III 12623326	23|A>G|0.130434783	0.998664	+	three_prime_utr	WBGene00013735	Y111B2A.12
IV 13408809	17|T>C|0.235294118	0.999983	-	three_prime_utr	WBGene00013382	gcl-1
III 12697798	9|A>G|0.222222222	0.99731	+	three_prime_utr	WBGene00013739	spin-4
V 13135059	15|T>C|0.2	0.999665	-	three_prime_utr	WBGene00007153	clec-41
III 12623321	20|A>G|0.45	1	+	three_prime_utr	WBGene00013735	Y111B2A.12
IV 13408790	13|T>C|0.153846154	0.993825	-	three_prime_utr	WBGene00013382	gcl-1
III 12623331	24|A>G|0.333333333	1	+	three_prime_utr	WBGene00013735	Y111B2A.12
III 12623337	22|A>G|0.818181818	1	+	three_prime_utr	WBGene00013735	Y111B2A.12
III 12623398	29|A>G|0.482758621	1	+	three_prime_utr	WBGene00013735	Y111B2A.12
IV 13408634	18|T>C|0.222222222	0.999979	-	three_prime_utr	WBGene00013382	gcl-1
IV 13408613	18|T>C|0.277777778	0.999999	-	three_prime_utr	WBGene00013382	gcl-1
III 12623434	35|A>G|0.085714286	0.995253	+	three_prime_utr	WBGene00013735	Y111B2A.12
II 12801706	12|T>C|0.75	1	-	three_prime_utr	WBGene00012908	Y46G5A.18
IV 13408635	18|T>C|0.333333333	1	-	three_prime_utr	WBGene00013382	gcl-1
III 12623411	29|A>G|0.413793103	1	+	three_prime_utr	WBGene00013735	Y111B2A.12
IV 13408643	17|T>C|0.294117647	1	-	three_prime_utr	WBGene00013382	gcl-1
IV 13408638	18|T>C|0.222222222	0.999979	-	three_prime_utr	WBGene00013382	gcl-1
V 13135033	15|T>C|0.2	0.999665	-	three_prime_utr	WBGene00007153	clec-41
III 12159766	7|A>G|0.285714286	0.99854	+	three_prime_utr	WBGene00013544	Y75B8A.7
III 12159701	11|A>G|0.181818182	0.995734	+	three_prime_utr	WBGene00013544	Y75B8A.7
I 1155290	38|T>C|0.289473684	1	-	three_prime_utr	WBGene00000165	aps-3
I 1155289	37|T>C|0.918918919	1	-	three_prime_utr	WBGene00000165	aps-3
III 12159794	7|A>G|0.285714286	0.99854	+	three_prime_utr	WBGene00013544	Y75B8A.7
III 12159809	7|A>G|0.285714286	0.99854	+	three_prime_utr	WBGene00013544	Y75B8A.7
III 12159805	7|A>G|0.571428571	1	+	three_prime_utr	WBGene00013544	Y75B8A.7
III 12159798	6|A>G|0.5	0.99999	+	three_prime_utr	WBGene00013544	Y75B8A.7
III 12159799	6|A>G|0.333333333	0.99902	+	three_prime_utr	WBGene00013544	Y75B8A.7
III 12159836	7|A>G|0.285714286	0.99854	+	three_prime_utr	WBGene00013544	Y75B8A.7
III 12159719	10|A>G|0.8	1	+	three_prime_utr	WBGene00013544	Y75B8A.7
I 1155312	45|T>C|0.8	1	-	three_prime_utr	WBGene00000165	aps-3
III 12159700	11|A>G|0.181818182	0.995734	+	three_prime_utr	WBGene00013544	Y75B8A.7
III 12623265	16|A>G|0.1875	0.999584	+	three_prime_utr	WBGene00013735	Y111B2A.12
III 12623309	21|A>G|0.19047619	0.999957	+	three_prime_utr	WBGene00013735	Y111B2A.12
V 13135849	13|T>C|0.846153846	1	-	three_prime_utr	WBGene00007153	clec-41
V 13135853	13|T>C|0.461538462	1	-	three_prime_utr	WBGene00007153	clec-41
V 13135854	13|T>C|0.615384615	1	-	three_prime_utr	WBGene00007153	clec-41
V 13135855	13|T>C|0.769230769	1	-	three_prime_utr	WBGene00007153	clec-41
V 13135861	14|T>C|0.714285714	1	-	three_prime_utr	WBGene00007153	clec-41
V 13135836	9|T>C|0.666666667	1	-	three_prime_utr	WBGene00007153	clec-41
V 13135837	9|T>C|0.333333333	0.999946	-	three_prime_utr	WBGene00007153	clec-41
V 13135078	14|T>C|0.857142857	1	-	three_prime_utr	WBGene00007153	clec-41
III 12622917	18|A>G|0.277777778	0.999999	+	three_prime_utr	WBGene00013735	Y111B2A.12
III 12622918	19|A>G|0.473684211	1	+	three_prime_utr	WBGene00013735	Y111B2A.12
III 12622919	19|A>G|0.210526316	0.999973	+	three_prime_utr	WBGene00013735	Y111B2A.12
V 13135073	15|T>C|0.6	1	-	three_prime_utr	WBGene00007153	clec-41
IV 13408958	46|T>C|0.086956522	0.998926	-	three_prime_utr	WBGene00013382	gcl-1
III 12622922	17|A>G|0.235294118	0.999983	+	three_prime_utr	WBGene00013735	Y111B2A.12
IV 13408957	46|T>C|0.195652174	1	-	three_prime_utr	WBGene00013382	gcl-1
I 1259409	8|T>C|0.25	0.997969	-	three_prime_utr	WBGene00001707	grh-1
III 12622775	25|A>G|0.12	0.998271	+	three_prime_utr	WBGene00013735	Y111B2A.12
V 13135819	8|T>C|0.25	0.997969	-	three_prime_utr	WBGene00007153	clec-41
V 13038613	30|T>C|0.1	0.996992	-	three_prime_utr	WBGene00012337	W07G4.3
I 1259380	7|T>C|0.857142857	1	-	three_prime_utr	WBGene00001707	grh-1
V 13038628	34|T>C|0.147058824	0.999981	-	three_prime_utr	WBGene00012337	W07G4.3
I 1259398	7|T>C|0.714285714	1	-	three_prime_utr	WBGene00001707	grh-1
V 13038636	38|T>C|0.236842105	1	-	three_prime_utr	WBGene00012337	W07G4.3
V 13037084	60|T>C|0.116666667	0.999998	-	three_prime_utr	WBGene00012337	W07G4.3
I 1259393	7|T>C|0.857142857	1	-	three_prime_utr	WBGene00001707	grh-1
V 13038606	26|T>C|0.230769231	1	-	three_prime_utr	WBGene00012337	W07G4.3
V 13038605	26|T>C|0.230769231	1	-	three_prime_utr	WBGene00012337	W07G4.3
I 1259397	7|T>C|0.714285714	1	-	three_prime_utr	WBGene00001707	grh-1
I 1259396	7|T>C|0.428571429	0.99998	-	three_prime_utr	WBGene00001707	grh-1
V 13038599	24|T>C|0.625	1	-	three_prime_utr	WBGene00012337	W07G4.3
V 13135107	10|T>C|0.2	0.996564	-	three_prime_utr	WBGene00007153	clec-41
V 13038594	22|T>C|0.227272727	0.999998	-	three_prime_utr	WBGene00012337	W07G4.3
V 13038608	26|T>C|0.307692308	1	-	three_prime_utr	WBGene00012337	W07G4.3
V 13037088	60|T>C|0.1	0.999971	-	three_prime_utr	WBGene00012337	W07G4.3
I 1259407	7|T>C|0.285714286	0.99854	-	three_prime_utr	WBGene00001707	grh-1
I 1259408	7|T>C|0.857142857	1	-	three_prime_utr	WBGene00001707	grh-1
V 13135812	8|T>C|0.25	0.997969	-	three_prime_utr	WBGene00007153	clec-41
V 13135818	8|T>C|0.875	1	-	three_prime_utr	WBGene00007153	clec-41
IV 13408853	31|T>C|0.451612903	1	-	three_prime_utr	WBGene00013382	gcl-1
IV 13408852	31|T>C|0.419354839	1	-	three_prime_utr	WBGene00013382	gcl-1
III 12623198	9|A>G|0.666666667	1	+	three_prime_utr	WBGene00013735	Y111B2A.12
V 13135914	26|T>C|0.192307692	0.999996	-	three_prime_utr	WBGene00007153	clec-41
III 12623236	15|A>G|0.266666667	0.999991	+	three_prime_utr	WBGene00013735	Y111B2A.12
III 12623238	16|A>G|0.3125	1	+	three_prime_utr	WBGene00013735	Y111B2A.12
V 13135915	26|T>C|0.384615385	1	-	three_prime_utr	WBGene00007153	clec-41
III 12623245	16|A>G|0.1875	0.999584	+	three_prime_utr	WBGene00013735	Y111B2A.12
III 12623064	16|A>G|0.25	0.999988	+	three_prime_utr	WBGene00013735	Y111B2A.12
III 12623065	16|A>G|0.5625	1	+	three_prime_utr	WBGene00013735	Y111B2A.12
IV 13408857	31|T>C|0.322580645	1	-	three_prime_utr	WBGene00013382	gcl-1
III 12623085	16|A>G|0.1875	0.999584	+	three_prime_utr	WBGene00013735	Y111B2A.12
III 12623098	14|A>G|0.142857143	0.992751	+	three_prime_utr	WBGene00013735	Y111B2A.12
IV 13408824	21|T>C|0.571428571	1	-	three_prime_utr	WBGene00013382	gcl-1
III 12623283	19|A>G|0.157894737	0.999271	+	three_prime_utr	WBGene00013735	Y111B2A.12
III 12623292	18|A>G|0.222222222	0.999979	+	three_prime_utr	WBGene00013735	Y111B2A.12
III 12623273	17|A>G|0.176470588	0.999492	+	three_prime_utr	WBGene00013735	Y111B2A.12
III 12623269	16|A>G|0.8125	1	+	three_prime_utr	WBGene00013735	Y111B2A.12
III 12623247	16|A>G|0.4375	1	+	three_prime_utr	WBGene00013735	Y111B2A.12
III 12171075	19|A>G|0.578947368	1	+	three_prime_utr	WBGene00013545	Y75B8A.8
IV 13408850	31|T>C|0.096774194	0.996682	-	three_prime_utr	WBGene00013382	gcl-1
III 12623248	16|A>G|0.6875	1	+	three_prime_utr	WBGene00013735	Y111B2A.12
III 12623257	16|A>G|0.3125	1	+	three_prime_utr	WBGene00013735	Y111B2A.12
III 12623258	16|A>G|0.6875	1	+	three_prime_utr	WBGene00013735	Y111B2A.12
III 12623263	16|A>G|0.625	1	+	three_prime_utr	WBGene00013735	Y111B2A.12
III 12623264	16|A>G|0.875	1	+	three_prime_utr	WBGene00013735	Y111B2A.12
III 12171074	19|A>G|0.210526316	0.999973	+	three_prime_utr	WBGene00013545	Y75B8A.8
V 13038607	26|T>C|0.538461538	1	-	three_prime_utr	WBGene00012337	W07G4.3
III 12623268	16|A>G|0.125	0.99037	+	three_prime_utr	WBGene00013735	Y111B2A.12
III 12622984	20|A>G|0.4	1	+	three_prime_utr	WBGene00013735	Y111B2A.12
IV 13408944	40|T>C|0.275	1	-	three_prime_utr	WBGene00013382	gcl-1
III 12622944	17|A>G|0.588235294	1	+	three_prime_utr	WBGene00013735	Y111B2A.12
III 12622945	17|A>G|0.705882353	1	+	three_prime_utr	WBGene00013735	Y111B2A.12
III 12622947	18|A>G|0.555555556	1	+	three_prime_utr	WBGene00013735	Y111B2A.12
III 12622957	17|A>G|0.882352941	1	+	three_prime_utr	WBGene00013735	Y111B2A.12
IV 13408932	40|T>C|0.875	1	-	three_prime_utr	WBGene00013382	gcl-1
IV 13408931	41|T>C|0.634146341	1	-	three_prime_utr	WBGene00013382	gcl-1
III 12622969	20|A>G|0.2	0.999966	+	three_prime_utr	WBGene00013735	Y111B2A.12
III 12622979	21|A>G|0.380952381	1	+	three_prime_utr	WBGene00013735	Y111B2A.12
V 13135061	15|T>C|0.2	0.999665	-	three_prime_utr	WBGene00007153	clec-41
III 12622929	15|A>G|0.133333333	0.991599	+	three_prime_utr	WBGene00013735	Y111B2A.12
III 12159711	11|A>G|0.272727273	0.999886	+	three_prime_utr	WBGene00013544	Y75B8A.7
IV 13408947	42|T>C|0.357142857	1	-	three_prime_utr	WBGene00013382	gcl-1
III 12622985	20|A>G|0.5	1	+	three_prime_utr	WBGene00013735	Y111B2A.12
IV 13408928	42|T>C|0.095238095	0.999246	-	three_prime_utr	WBGene00013382	gcl-1
III 12623012	22|A>G|0.727272727	1	+	three_prime_utr	WBGene00013735	Y111B2A.12
III 12623022	24|A>G|0.291666667	1	+	three_prime_utr	WBGene00013735	Y111B2A.12
IV 13408879	38|T>C|0.236842105	1	-	three_prime_utr	WBGene00013382	gcl-1
III 12623027	24|A>G|0.166666667	0.999924	+	three_prime_utr	WBGene00013735	Y111B2A.12
IV 13408878	37|T>C|0.243243243	1	-	three_prime_utr	WBGene00013382	gcl-1
IV 13408861	32|T>C|0.375	1	-	three_prime_utr	WBGene00013382	gcl-1
III 12623011	23|A>G|0.52173913	1	+	three_prime_utr	WBGene00013735	Y111B2A.12
IV 13408919	43|T>C|0.162790698	1	-	three_prime_utr	WBGene00013382	gcl-1
IV 13408927	42|T>C|0.119047619	0.999944	-	three_prime_utr	WBGene00013382	gcl-1
III 12622990	20|A>G|0.4	1	+	three_prime_utr	WBGene00013735	Y111B2A.12
III 12622991	20|A>G|0.2	0.999966	+	three_prime_utr	WBGene00013735	Y111B2A.12
III 12623006	23|A>G|0.173913043	0.999937	+	three_prime_utr	WBGene00013735	Y111B2A.12
III 12623001	22|A>G|0.136363636	0.998838	+	three_prime_utr	WBGene00013735	Y111B2A.12
III 12623005	23|A>G|0.130434783	0.998664	+	three_prime_utr	WBGene00013735	Y111B2A.12
I 2722343	18|T>C|0.666666667	1	-	three_prime_utr	WBGene00022128	Y71F9B.6
I 9903636	27|T>C|0.62962963	1	-	three_prime_utr	WBGene00009939	ztf-11
I 2722344	18|T>C|0.166666667	0.999388	-	three_prime_utr	WBGene00022128	Y71F9B.6
I 9903637	27|T>C|0.666666667	1	-	three_prime_utr	WBGene00009939	ztf-11
I 9903624	34|T>C|0.176470588	0.999999	-	three_prime_utr	WBGene00009939	ztf-11
I 2722342	18|T>C|0.5	1	-	three_prime_utr	WBGene00022128	Y71F9B.6
I 2722346	17|T>C|0.823529412	1	-	three_prime_utr	WBGene00022128	Y71F9B.6
I 9903650	27|T>C|0.296296296	1	-	three_prime_utr	WBGene00009939	ztf-11
I 2722354	17|T>C|0.176470588	0.999492	-	three_prime_utr	WBGene00022128	Y71F9B.6
I 2722353	17|T>C|0.294117647	1	-	three_prime_utr	WBGene00022128	Y71F9B.6
I 2722347	17|T>C|0.823529412	1	-	three_prime_utr	WBGene00022128	Y71F9B.6
I 2722375	24|T>C|0.333333333	1	-	three_prime_utr	WBGene00022128	Y71F9B.6
I 2721989	33|T>C|0.181818182	0.999999	-	three_prime_utr	WBGene00022128	Y71F9B.6
I 2722313	22|T>C|0.181818182	0.999948	-	three_prime_utr	WBGene00022128	Y71F9B.6
I 2722341	19|T>C|0.157894737	0.999271	-	three_prime_utr	WBGene00022128	Y71F9B.6
I 9903779	11|T>C|0.363636364	0.999998	-	three_prime_utr	WBGene00009939	ztf-11
I 2722409	24|T>C|0.333333333	1	-	three_prime_utr	WBGene00022128	Y71F9B.6
I 2722406	24|T>C|0.125	0.998475	-	three_prime_utr	WBGene00022128	Y71F9B.6
I 9903656	27|T>C|0.111111111	0.997811	-	three_prime_utr	WBGene00009939	ztf-11
I 2722386	25|T>C|0.16	0.999909	-	three_prime_utr	WBGene00022128	Y71F9B.6
I 2722376	24|T>C|0.208333333	0.999997	-	three_prime_utr	WBGene00022128	Y71F9B.6
I 9903757	7|T>C|0.571428571	1	-	three_prime_utr	WBGene00009939	ztf-11
I 9903756	7|T>C|0.428571429	0.99998	-	three_prime_utr	WBGene00009939	ztf-11
I 2722396	25|T>C|0.12	0.998271	-	three_prime_utr	WBGene00022128	Y71F9B.6
IV 4552363	11|A>G|0.181818182	0.995734	+	three_prime_utr	WBGene00022681	ZK185.1
I 14855929	66|T>C|0.181818182	1	-	three_prime_utr	WBGene00006789	unc-54
I 14855909	57|T>C|0.087719298	0.99975	-	three_prime_utr	WBGene00006789	unc-54
I 2721975	32|T>C|0.15625	0.999986	-	three_prime_utr	WBGene00022128	Y71F9B.6
III 12698155	9|A>G|0.555555556	1	+	three_prime_utr	WBGene00013739	spin-4
III 12698191	10|A>G|0.4	0.999999	+	three_prime_utr	WBGene00013739	spin-4
III 12698179	11|A>G|0.363636364	0.999998	+	three_prime_utr	WBGene00013739	spin-4
III 12698168	10|A>G|0.2	0.996564	+	three_prime_utr	WBGene00013739	spin-4
III 12698158	9|A>G|0.555555556	1	+	three_prime_utr	WBGene00013739	spin-4
III 12698154	9|A>G|0.222222222	0.99731	+	three_prime_utr	WBGene00013739	spin-4
III 12698126	8|A>G|0.5	1	+	three_prime_utr	WBGene00013739	spin-4
III 12698123	8|A>G|0.625	1	+	three_prime_utr	WBGene00013739	spin-4
III 12710785	7|A>G|0.428571429	0.99998	+	three_prime_utr	WBGene00013742	Y111B2A.24
III 12710772	6|A>G|0.666666667	1	+	three_prime_utr	WBGene00013742	Y111B2A.24
III 12698205	9|A>G|0.222222222	0.99731	+	three_prime_utr	WBGene00013739	spin-4
III 12710722	13|A>G|0.230769231	0.999794	+	three_prime_utr	WBGene00013742	Y111B2A.24
III 12710717	14|A>G|0.357142857	1	+	three_prime_utr	WBGene00013742	Y111B2A.24
I 2721973	33|T>C|0.333333333	1	-	three_prime_utr	WBGene00022128	Y71F9B.6
I 2721903	32|T>C|0.53125	1	-	three_prime_utr	WBGene00022128	Y71F9B.6
I 2721902	32|T>C|0.09375	0.996354	-	three_prime_utr	WBGene00022128	Y71F9B.6
IV 1201655	26|A>G|0.230769231	1	+	three_prime_utr	WBGene00022427	Y104H12D.3
I 2721963	34|T>C|0.264705882	1	-	three_prime_utr	WBGene00022128	Y71F9B.6
IV 1201518	56|A>G|0.089285714	0.99977	+	three_prime_utr	WBGene00022427	Y104H12D.3
I 2721972	33|T>C|0.666666667	1	-	three_prime_utr	WBGene00022128	Y71F9B.6
I 2721971	33|T>C|0.181818182	0.999999	-	three_prime_utr	WBGene00022128	Y71F9B.6
I 2721966	33|T>C|0.666666667	1	-	three_prime_utr	WBGene00022128	Y71F9B.6
I 2721937	35|T>C|0.2	1	-	three_prime_utr	WBGene00022128	Y71F9B.6
I 2721927	31|T>C|0.129032258	0.999777	-	three_prime_utr	WBGene00022128	Y71F9B.6
I 2721940	35|T>C|0.085714286	0.995253	-	three_prime_utr	WBGene00022128	Y71F9B.6
I 2721962	35|T>C|0.2	1	-	three_prime_utr	WBGene00022128	Y71F9B.6
I 2721961	34|T>C|0.088235294	0.99564	-	three_prime_utr	WBGene00022128	Y71F9B.6
I 2721952	35|T>C|0.2	1	-	three_prime_utr	WBGene00022128	Y71F9B.6
I 2721951	35|T>C|0.542857143	1	-	three_prime_utr	WBGene00022128	Y71F9B.6
I 1155277	37|T>C|0.378378378	1	-	three_prime_utr	WBGene00000165	aps-3
I 629833	26|T>C|0.5	1	-	three_prime_utr	WBGene00022029	Y65B4A.6
I 629832	26|T>C|0.615384615	1	-	three_prime_utr	WBGene00022029	Y65B4A.6
III 2707199	12|A>G|0.166666667	0.99482	+	three_prime_utr	WBGene00022173	set-27
I 629850	34|T>C|0.117647059	0.999675	-	three_prime_utr	WBGene00022029	Y65B4A.6
I 629842	30|T>C|0.366666667	1	-	three_prime_utr	WBGene00022029	Y65B4A.6
I 629841	30|T>C|0.366666667	1	-	three_prime_utr	WBGene00022029	Y65B4A.6
III 2707225	9|A>G|0.444444444	0.999999	+	three_prime_utr	WBGene00022173	set-27
I 629884	40|T>C|0.225	1	-	three_prime_utr	WBGene00022029	Y65B4A.6
I 629813	16|T>C|0.1875	0.999584	-	three_prime_utr	WBGene00022029	Y65B4A.6
I 629807	16|T>C|0.1875	0.999584	-	three_prime_utr	WBGene00022029	Y65B4A.6
I 629806	16|T>C|0.375	1	-	three_prime_utr	WBGene00022029	Y65B4A.6
I 629804	15|T>C|0.466666667	1	-	three_prime_utr	WBGene00022029	Y65B4A.6
I 629831	25|T>C|0.64	1	-	three_prime_utr	WBGene00022029	Y65B4A.6
III 2707550	13|A>G|0.307692308	0.999995	+	three_prime_utr	WBGene00022173	set-27
III 2707551	13|A>G|0.230769231	0.999794	+	three_prime_utr	WBGene00022173	set-27
III 2707577	15|A>G|0.4	1	+	three_prime_utr	WBGene00022173	set-27
III 2707578	15|A>G|0.533333333	1	+	three_prime_utr	WBGene00022173	set-27
III 2707581	15|A>G|0.333333333	1	+	three_prime_utr	WBGene00022173	set-27
I 629821	20|T>C|0.15	0.999141	-	three_prime_utr	WBGene00022029	Y65B4A.6
III 1555616	17|T>C|0.411764706	1	-	three_prime_utr	WBGene00022057	Y67D2.7
III 1555609	16|T>C|0.875	1	-	three_prime_utr	WBGene00022057	Y67D2.7
III 1555723	24|T>C|0.125	0.998475	-	three_prime_utr	WBGene00022057	Y67D2.7
III 1555732	24|T>C|0.208333333	0.999997	-	three_prime_utr	WBGene00022057	Y67D2.7
III 1555735	22|T>C|0.227272727	0.999998	-	three_prime_utr	WBGene00022057	Y67D2.7
III 1555725	24|T>C|0.583333333	1	-	three_prime_utr	WBGene00022057	Y67D2.7
I 630092	11|T>C|0.272727273	0.999886	-	three_prime_utr	WBGene00022029	Y65B4A.6
III 1555724	24|T>C|0.375	1	-	three_prime_utr	WBGene00022057	Y67D2.7
III 2422751	8|A>G|0.25	0.997969	+	three_prime_utr	WBGene00021020	W04B5.3
III 2422815	5|A>G|0.8	1	+	three_prime_utr	WBGene00021020	W04B5.3
III 2422819	5|A>G|0.6	0.999996	+	three_prime_utr	WBGene00021020	W04B5.3
I 629921	41|T>C|0.463414634	1	-	three_prime_utr	WBGene00022029	Y65B4A.6
I 629920	42|T>C|0.142857143	0.999997	-	three_prime_utr	WBGene00022029	Y65B4A.6
III 1555608	16|T>C|0.125	0.99037	-	three_prime_utr	WBGene00022057	Y67D2.7
III 1555587	13|T>C|0.153846154	0.993825	-	three_prime_utr	WBGene00022057	Y67D2.7
I 630091	11|T>C|0.181818182	0.995734	-	three_prime_utr	WBGene00022029	Y65B4A.6
I 1376121	38|A>G|0.131578947	0.999967	+	three_prime_utr	WBGene00022366	Y92H12BL.5
III 1031632	14|T>C|0.142857143	0.992751	-	three_prime_utr	WBGene00015267	chin-1
I 1376107	34|A>G|0.911764706	1	+	three_prime_utr	WBGene00022366	Y92H12BL.5
I 1376034	20|A>G|0.35	1	+	three_prime_utr	WBGene00022366	Y92H12BL.5
I 1376217	29|A>G|0.206896552	1	+	three_prime_utr	WBGene00022366	Y92H12BL.5
I 1375998	13|A>G|0.230769231	0.999794	+	three_prime_utr	WBGene00022366	Y92H12BL.5
II 14347010	28|T>C|0.142857143	0.999854	-	three_prime_utr	WBGene00002996	lin-7
I 1375932	20|A>G|0.5	1	+	three_prime_utr	WBGene00022366	Y92H12BL.5
I 1375927	20|A>G|0.2	0.999966	+	three_prime_utr	WBGene00022366	Y92H12BL.5
I 1375925	20|A>G|0.2	0.999966	+	three_prime_utr	WBGene00022366	Y92H12BL.5
I 1375924	20|A>G|0.15	0.999141	+	three_prime_utr	WBGene00022366	Y92H12BL.5
I 1375920	20|A>G|0.85	1	+	three_prime_utr	WBGene00022366	Y92H12BL.5
I 1375933	20|A>G|0.45	1	+	three_prime_utr	WBGene00022366	Y92H12BL.5
I 1375916	20|A>G|0.15	0.999141	+	three_prime_utr	WBGene00022366	Y92H12BL.5
I 1375915	20|A>G|0.3	1	+	three_prime_utr	WBGene00022366	Y92H12BL.5
II 14346993	27|T>C|0.222222222	1	-	three_prime_utr	WBGene00002996	lin-7
I 1375934	20|A>G|0.2	0.999966	+	three_prime_utr	WBGene00022366	Y92H12BL.5
II 14346980	27|T>C|0.111111111	0.997811	-	three_prime_utr	WBGene00002996	lin-7
I 1375976	14|A>G|0.357142857	1	+	three_prime_utr	WBGene00022366	Y92H12BL.5
I 1375965	15|A>G|0.2	0.999665	+	three_prime_utr	WBGene00022366	Y92H12BL.5
II 14346990	27|T>C|0.925925926	1	-	three_prime_utr	WBGene00002996	lin-7
I 1375938	20|A>G|0.95	1	+	three_prime_utr	WBGene00022366	Y92H12BL.5
I 1375951	19|A>G|0.842105263	1	+	three_prime_utr	WBGene00022366	Y92H12BL.5
I 1375950	19|A>G|0.684210526	1	+	three_prime_utr	WBGene00022366	Y92H12BL.5
II 14346992	27|T>C|0.407407407	1	-	three_prime_utr	WBGene00002996	lin-7
I 1375939	20|A>G|0.25	0.999999	+	three_prime_utr	WBGene00022366	Y92H12BL.5
I 1376224	25|A>G|0.24	1	+	three_prime_utr	WBGene00022366	Y92H12BL.5
I 1376228	24|A>G|0.458333333	1	+	three_prime_utr	WBGene00022366	Y92H12BL.5
I 1376393	8|A>G|0.5	1	+	three_prime_utr	WBGene00022366	Y92H12BL.5
I 1376390	8|A>G|0.5	1	+	three_prime_utr	WBGene00022366	Y92H12BL.5
I 1376383	8|A>G|0.5	1	+	three_prime_utr	WBGene00022366	Y92H12BL.5
I 1376378	8|A>G|0.5	1	+	three_prime_utr	WBGene00022366	Y92H12BL.5
I 629792	13|T>C|0.153846154	0.993825	-	three_prime_utr	WBGene00022029	Y65B4A.6
I 1376394	8|A>G|0.375	0.999966	+	three_prime_utr	WBGene00022366	Y92H12BL.5
I 629801	15|T>C|0.133333333	0.991599	-	three_prime_utr	WBGene00022029	Y65B4A.6
I 629796	14|T>C|0.285714286	0.999993	-	three_prime_utr	WBGene00022029	Y65B4A.6
I 1376402	8|A>G|0.875	1	+	three_prime_utr	WBGene00022366	Y92H12BL.5
I 629795	13|T>C|0.153846154	0.993825	-	three_prime_utr	WBGene00022029	Y65B4A.6
I 1376399	8|A>G|0.25	0.997969	+	three_prime_utr	WBGene00022366	Y92H12BL.5
I 1376398	8|A>G|0.875	1	+	three_prime_utr	WBGene00022366	Y92H12BL.5
I 629793	13|T>C|0.153846154	0.993825	-	three_prime_utr	WBGene00022029	Y65B4A.6
I 1376397	8|A>G|0.25	0.997969	+	three_prime_utr	WBGene00022366	Y92H12BL.5
I 1376377	8|A>G|0.875	1	+	three_prime_utr	WBGene00022366	Y92H12BL.5
I 629786	11|T>C|0.272727273	0.999886	-	three_prime_utr	WBGene00022029	Y65B4A.6
I 1376269	22|A>G|0.409090909	1	+	three_prime_utr	WBGene00022366	Y92H12BL.5
I 1376263	18|A>G|0.944444444	1	+	three_prime_utr	WBGene00022366	Y92H12BL.5
I 629781	9|T>C|0.333333333	0.999946	-	three_prime_utr	WBGene00022029	Y65B4A.6
I 1376262	18|A>G|0.611111111	1	+	three_prime_utr	WBGene00022366	Y92H12BL.5
I 1376252	18|A>G|0.666666667	1	+	three_prime_utr	WBGene00022366	Y92H12BL.5
I 629776	9|T>C|0.333333333	0.999946	-	three_prime_utr	WBGene00022029	Y65B4A.6
I 1376240	20|A>G|0.95	1	+	three_prime_utr	WBGene00022366	Y92H12BL.5
I 1376230	24|A>G|0.125	0.998475	+	three_prime_utr	WBGene00022366	Y92H12BL.5
I 1376229	24|A>G|0.166666667	0.999924	+	three_prime_utr	WBGene00022366	Y92H12BL.5
I 1376280	19|A>G|0.526315789	1	+	three_prime_utr	WBGene00022366	Y92H12BL.5
I 1376354	8|A>G|0.875	1	+	three_prime_utr	WBGene00022366	Y92H12BL.5
I 1376353	8|A>G|0.625	1	+	three_prime_utr	WBGene00022366	Y92H12BL.5
I 1376341	9|A>G|0.222222222	0.99731	+	three_prime_utr	WBGene00022366	Y92H12BL.5
I 1376318	17|A>G|0.352941176	1	+	three_prime_utr	WBGene00022366	Y92H12BL.5
III 1555755	23|T>C|0.391304348	1	-	three_prime_utr	WBGene00022057	Y67D2.7
I 630261	6|T>C|0.833333333	1	-	three_prime_utr	WBGene00022029	Y65B4A.6
I 630774	8|T>C|0.625	1	-	three_prime_utr	WBGene00022029	Y65B4A.6
I 630822	12|T>C|0.166666667	0.99482	-	three_prime_utr	WBGene00022029	Y65B4A.6
I 630798	11|T>C|0.727272727	1	-	three_prime_utr	WBGene00022029	Y65B4A.6
I 630797	11|T>C|0.272727273	0.999886	-	three_prime_utr	WBGene00022029	Y65B4A.6
I 630796	11|T>C|0.181818182	0.995734	-	three_prime_utr	WBGene00022029	Y65B4A.6
I 630596	5|T>C|0.6	0.999996	-	three_prime_utr	WBGene00022029	Y65B4A.6
I 630750	5|T>C|0.6	0.999996	-	three_prime_utr	WBGene00022029	Y65B4A.6
I 630625	7|T>C|0.571428571	1	-	three_prime_utr	WBGene00022029	Y65B4A.6
I 630737	8|T>C|0.375	0.999966	-	three_prime_utr	WBGene00022029	Y65B4A.6
I 630736	8|T>C|0.25	0.997969	-	three_prime_utr	WBGene00022029	Y65B4A.6
I 630649	5|T>C|0.8	1	-	three_prime_utr	WBGene00022029	Y65B4A.6
I 630624	7|T>C|0.428571429	0.99998	-	three_prime_utr	WBGene00022029	Y65B4A.6
I 630619	7|T>C|0.571428571	1	-	three_prime_utr	WBGene00022029	Y65B4A.6
I 630825	12|T>C|0.166666667	0.99482	-	three_prime_utr	WBGene00022029	Y65B4A.6
I 630826	12|T>C|0.166666667	0.99482	-	three_prime_utr	WBGene00022029	Y65B4A.6
I 630914	14|T>C|0.571428571	1	-	three_prime_utr	WBGene00022029	Y65B4A.6
I 630994	23|T>C|0.826086957	1	-	three_prime_utr	WBGene00022029	Y65B4A.6
I 630963	20|T>C|0.45	1	-	three_prime_utr	WBGene00022029	Y65B4A.6
I 630954	15|T>C|0.2	0.999665	-	three_prime_utr	WBGene00022029	Y65B4A.6
I 630997	24|T>C|0.333333333	1	-	three_prime_utr	WBGene00022029	Y65B4A.6
I 630909	15|T>C|0.266666667	0.999991	-	three_prime_utr	WBGene00022029	Y65B4A.6
I 630903	14|T>C|0.571428571	1	-	three_prime_utr	WBGene00022029	Y65B4A.6
I 631010	27|T>C|0.666666667	1	-	three_prime_utr	WBGene00022029	Y65B4A.6
I 631009	27|T>C|0.111111111	0.997811	-	three_prime_utr	WBGene00022029	Y65B4A.6
III 861222	17|A>G|0.176470588	0.999492	+	three_prime_utr	WBGene00000202	exos-4.2
I 631001	24|T>C|0.166666667	0.999924	-	three_prime_utr	WBGene00022029	Y65B4A.6
I 631000	24|T>C|0.166666667	0.999924	-	three_prime_utr	WBGene00022029	Y65B4A.6
I 630895	15|T>C|0.2	0.999665	-	three_prime_utr	WBGene00022029	Y65B4A.6
I 630842	14|T>C|0.285714286	0.999993	-	three_prime_utr	WBGene00022029	Y65B4A.6
I 630841	14|T>C|0.428571429	1	-	three_prime_utr	WBGene00022029	Y65B4A.6
I 630837	14|T>C|0.714285714	1	-	three_prime_utr	WBGene00022029	Y65B4A.6
I 630836	14|T>C|0.214285714	0.999735	-	three_prime_utr	WBGene00022029	Y65B4A.6
I 630828	12|T>C|0.333333333	0.999997	-	three_prime_utr	WBGene00022029	Y65B4A.6
I 630827	12|T>C|0.5	1	-	three_prime_utr	WBGene00022029	Y65B4A.6
I 630894	15|T>C|0.133333333	0.991599	-	three_prime_utr	WBGene00022029	Y65B4A.6
I 630872	15|T>C|0.133333333	0.991599	-	three_prime_utr	WBGene00022029	Y65B4A.6
I 630857	14|T>C|0.571428571	1	-	three_prime_utr	WBGene00022029	Y65B4A.6
I 630856	14|T>C|0.285714286	0.999993	-	three_prime_utr	WBGene00022029	Y65B4A.6
I 630850	14|T>C|0.142857143	0.992751	-	three_prime_utr	WBGene00022029	Y65B4A.6
V 3750005	44|T>C|0.090909091	0.999096	-	three_prime_utr	WBGene00021482	Y39H10A.6
I 630457	32|T>C|0.71875	1	-	three_prime_utr	WBGene00022029	Y65B4A.6
I 630503	22|T>C|0.363636364	1	-	three_prime_utr	WBGene00022029	Y65B4A.6
I 630502	22|T>C|0.136363636	0.998838	-	three_prime_utr	WBGene00022029	Y65B4A.6
I 630501	21|T>C|0.333333333	1	-	three_prime_utr	WBGene00022029	Y65B4A.6
I 630469	29|T>C|0.310344828	1	-	three_prime_utr	WBGene00022029	Y65B4A.6
I 630462	31|T>C|0.129032258	0.999777	-	three_prime_utr	WBGene00022029	Y65B4A.6
I 630458	32|T>C|0.1875	0.999999	-	three_prime_utr	WBGene00022029	Y65B4A.6
I 630442	39|T>C|0.512820513	1	-	three_prime_utr	WBGene00022029	Y65B4A.6
V 3750012	43|T>C|0.674418605	1	-	three_prime_utr	WBGene00021482	Y39H10A.6
I 630406	43|T>C|0.186046512	1	-	three_prime_utr	WBGene00022029	Y65B4A.6
I 630275	7|T>C|0.571428571	1	-	three_prime_utr	WBGene00022029	Y65B4A.6
I 630439	39|T>C|0.41025641	1	-	three_prime_utr	WBGene00022029	Y65B4A.6
I 630438	39|T>C|0.102564103	0.999437	-	three_prime_utr	WBGene00022029	Y65B4A.6
I 630433	40|T>C|0.1	0.999378	-	three_prime_utr	WBGene00022029	Y65B4A.6
I 630409	42|T>C|0.095238095	0.999246	-	three_prime_utr	WBGene00022029	Y65B4A.6
I 630424	40|T>C|0.2	1	-	three_prime_utr	WBGene00022029	Y65B4A.6
I 630423	41|T>C|0.585365854	1	-	three_prime_utr	WBGene00022029	Y65B4A.6
I 630413	41|T>C|0.487804878	1	-	three_prime_utr	WBGene00022029	Y65B4A.6
I 630412	41|T>C|0.195121951	1	-	three_prime_utr	WBGene00022029	Y65B4A.6
I 630410	42|T>C|0.452380952	1	-	three_prime_utr	WBGene00022029	Y65B4A.6
I 630504	22|T>C|0.318181818	1	-	three_prime_utr	WBGene00022029	Y65B4A.6
V 3750058	52|T>C|0.211538462	1	-	three_prime_utr	WBGene00021482	Y39H10A.6
V 3750060	53|T>C|0.226415094	1	-	three_prime_utr	WBGene00021482	Y39H10A.6
V 3750074	59|T>C|0.186440678	1	-	three_prime_utr	WBGene00021482	Y39H10A.6
V 3750078	56|T>C|0.178571429	1	-	three_prime_utr	WBGene00021482	Y39H10A.6
V 3750079	57|T>C|0.157894737	1	-	three_prime_utr	WBGene00021482	Y39H10A.6
I 630590	5|T>C|0.6	0.999996	-	three_prime_utr	WBGene00022029	Y65B4A.6
I 630523	14|T>C|0.142857143	0.992751	-	three_prime_utr	WBGene00022029	Y65B4A.6
V 3750013	44|T>C|0.590909091	1	-	three_prime_utr	WBGene00021482	Y39H10A.6
V 3750024	45|T>C|0.155555556	1	-	three_prime_utr	WBGene00021482	Y39H10A.6
V 3750151	78|T>C|0.064102564	0.998913	-	three_prime_utr	WBGene00021482	Y39H10A.6
I 630545	6|T>C|0.333333333	0.99902	-	three_prime_utr	WBGene00022029	Y65B4A.6
V 3750085	56|T>C|0.071428571	0.997728	-	three_prime_utr	WBGene00021482	Y39H10A.6
I 630532	14|T>C|0.285714286	0.999993	-	three_prime_utr	WBGene00022029	Y65B4A.6
V 3750147	76|T>C|0.065789474	0.999034	-	three_prime_utr	WBGene00021482	Y39H10A.6
I 630546	6|T>C|0.333333333	0.99902	-	three_prime_utr	WBGene00022029	Y65B4A.6
V 3750141	73|T>C|0.068493151	0.999198	-	three_prime_utr	WBGene00021482	Y39H10A.6
V 3750089	58|T>C|0.120689655	0.999998	-	three_prime_utr	WBGene00021482	Y39H10A.6
V 3750090	59|T>C|0.084745763	0.999705	-	three_prime_utr	WBGene00021482	Y39H10A.6
V 3750108	63|T>C|0.301587302	1	-	three_prime_utr	WBGene00021482	Y39H10A.6
V 3750117	63|T>C|0.650793651	1	-	three_prime_utr	WBGene00021482	Y39H10A.6
I 630580	5|T>C|0.8	1	-	three_prime_utr	WBGene00022029	Y65B4A.6
V 3750123	66|T>C|0.242424242	1	-	three_prime_utr	WBGene00021482	Y39H10A.6
V 3750124	66|T>C|0.393939394	1	-	three_prime_utr	WBGene00021482	Y39H10A.6
I 630571	6|T>C|0.833333333	1	-	three_prime_utr	WBGene00022029	Y65B4A.6
I 630570	6|T>C|0.333333333	0.99902	-	three_prime_utr	WBGene00022029	Y65B4A.6
III 850431	43|A>G|0.069767442	0.991416	+	three_prime_utr	WBGene00019326	K02F3.2
V 8855214	13|T>C|0.461538462	1	-	three_prime_utr	WBGene00017190	F07B7.12
V 8855202	10|T>C|0.2	0.996564	-	three_prime_utr	WBGene00017190	F07B7.12
V 8855201	10|T>C|0.2	0.996564	-	three_prime_utr	WBGene00017190	F07B7.12
V 8855196	10|T>C|0.3	0.99992	-	three_prime_utr	WBGene00017190	F07B7.12
III 5459516	19|A>G|0.473684211	1	+	three_prime_utr	WBGene00018611	F48E8.4
III 5459500	22|A>G|0.181818182	0.999948	+	three_prime_utr	WBGene00018611	F48E8.4
III 5459482	26|A>G|0.115384615	0.998049	+	three_prime_utr	WBGene00018611	F48E8.4
V 8855224	19|T>C|0.157894737	0.999271	-	three_prime_utr	WBGene00017190	F07B7.12
V 8855225	19|T>C|0.157894737	0.999271	-	three_prime_utr	WBGene00017190	F07B7.12
V 9556560	77|T>C|0.103896104	0.999999	-	three_prime_utr	WBGene00009100	rgef-1
V 9556578	80|T>C|0.1625	1	-	three_prime_utr	WBGene00009100	rgef-1
V 9556572	81|T>C|0.074074074	0.99984	-	three_prime_utr	WBGene00009100	rgef-1
V 9556554	73|T>C|0.178082192	1	-	three_prime_utr	WBGene00009100	rgef-1
V 9556399	47|T>C|0.085106383	0.998833	-	three_prime_utr	WBGene00009100	rgef-1
V 9556607	88|T>C|0.113636364	1	-	three_prime_utr	WBGene00009100	rgef-1
V 9556614	89|T>C|0.078651685	0.999969	-	three_prime_utr	WBGene00009100	rgef-1
V 9556623	84|T>C|0.142857143	1	-	three_prime_utr	WBGene00009100	rgef-1
V 9556619	85|T>C|0.070588235	0.999791	-	three_prime_utr	WBGene00009100	rgef-1
V 9556398	47|T>C|0.127659574	0.999993	-	three_prime_utr	WBGene00009100	rgef-1
I 1358847	24|A>G|0.75	1	+	three_prime_utr	WBGene00022363	Y92H12BL.1
I 1358857	25|A>G|0.44	1	+	three_prime_utr	WBGene00022363	Y92H12BL.1
I 1358853	25|A>G|0.12	0.998271	+	three_prime_utr	WBGene00022363	Y92H12BL.1
I 1358849	25|A>G|0.12	0.998271	+	three_prime_utr	WBGene00022363	Y92H12BL.1
I 1358848	25|A>G|0.44	1	+	three_prime_utr	WBGene00022363	Y92H12BL.1
I 1358862	25|A>G|0.68	1	+	three_prime_utr	WBGene00022363	Y92H12BL.1
I 1358824	25|A>G|0.24	1	+	three_prime_utr	WBGene00022363	Y92H12BL.1
I 1358810	22|A>G|0.136363636	0.998838	+	three_prime_utr	WBGene00022363	Y92H12BL.1
I 1358809	22|A>G|0.136363636	0.998838	+	three_prime_utr	WBGene00022363	Y92H12BL.1
V 9556355	59|T>C|0.06779661	0.997239	-	three_prime_utr	WBGene00009100	rgef-1
V 9556396	48|T>C|0.104166667	0.999892	-	three_prime_utr	WBGene00009100	rgef-1
V 9556386	48|T>C|0.333333333	1	-	three_prime_utr	WBGene00009100	rgef-1
III 464733	9|T>C|0.444444444	0.999999	-	three_prime_utr	WBGene00021914	magu-1
V 9556375	48|T>C|0.875	1	-	three_prime_utr	WBGene00009100	rgef-1
III 464730	9|T>C|0.222222222	0.99731	-	three_prime_utr	WBGene00021914	magu-1
III 464723	9|T>C|0.333333333	0.999946	-	three_prime_utr	WBGene00021914	magu-1
I 1358872	25|A>G|0.76	1	+	three_prime_utr	WBGene00022363	Y92H12BL.1
V 9556358	58|T>C|0.068965517	0.997409	-	three_prime_utr	WBGene00009100	rgef-1
I 1359424	24|A>G|0.833333333	1	+	three_prime_utr	WBGene00022363	Y92H12BL.1
I 1359514	25|A>G|0.12	0.998271	+	three_prime_utr	WBGene00022363	Y92H12BL.1
II 14347028	30|T>C|0.633333333	1	-	three_prime_utr	WBGene00002996	lin-7
II 14347038	34|T>C|0.470588235	1	-	three_prime_utr	WBGene00002996	lin-7
I 1359506	25|A>G|0.12	0.998271	+	three_prime_utr	WBGene00022363	Y92H12BL.1
II 14347039	34|T>C|0.117647059	0.999675	-	three_prime_utr	WBGene00002996	lin-7
II 14347023	31|T>C|0.096774194	0.996682	-	three_prime_utr	WBGene00002996	lin-7
II 14347027	30|T>C|0.6	1	-	three_prime_utr	WBGene00002996	lin-7
I 1359497	26|A>G|0.153846154	0.999893	+	three_prime_utr	WBGene00022363	Y92H12BL.1
I 1359434	25|A>G|0.12	0.998271	+	three_prime_utr	WBGene00022363	Y92H12BL.1
I 1359430	24|A>G|0.5	1	+	three_prime_utr	WBGene00022363	Y92H12BL.1
I 1359490	25|A>G|0.24	1	+	three_prime_utr	WBGene00022363	Y92H12BL.1
I 1359429	24|A>G|0.708333333	1	+	three_prime_utr	WBGene00022363	Y92H12BL.1
I 1359475	24|A>G|0.375	1	+	three_prime_utr	WBGene00022363	Y92H12BL.1
I 1359474	24|A>G|0.333333333	1	+	three_prime_utr	WBGene00022363	Y92H12BL.1
I 1358799	25|A>G|0.16	0.999909	+	three_prime_utr	WBGene00022363	Y92H12BL.1
I 1358465	19|A>G|0.526315789	1	+	three_prime_utr	WBGene00022363	Y92H12BL.1
I 1358489	14|A>G|0.214285714	0.999735	+	three_prime_utr	WBGene00022363	Y92H12BL.1
I 1358502	18|A>G|0.666666667	1	+	three_prime_utr	WBGene00022363	Y92H12BL.1
I 1358501	18|A>G|0.722222222	1	+	three_prime_utr	WBGene00022363	Y92H12BL.1
I 1358479	15|A>G|0.133333333	0.991599	+	three_prime_utr	WBGene00022363	Y92H12BL.1
V 8924340	25|T>C|0.48	1	-	three_prime_utr	WBGene00019204	H14N18.4
V 8855250	27|T>C|0.111111111	0.997811	-	three_prime_utr	WBGene00017190	F07B7.12
V 8855246	27|T>C|0.481481481	1	-	three_prime_utr	WBGene00017190	F07B7.12
V 8855245	27|T>C|0.555555556	1	-	three_prime_utr	WBGene00017190	F07B7.12
V 8855238	26|T>C|0.115384615	0.998049	-	three_prime_utr	WBGene00017190	F07B7.12
V 8924337	25|T>C|0.16	0.999909	-	three_prime_utr	WBGene00019204	H14N18.4
V 8924316	17|T>C|0.529411765	1	-	three_prime_utr	WBGene00019204	H14N18.4
V 8924306	13|T>C|0.538461538	1	-	three_prime_utr	WBGene00019204	H14N18.4
V 8924304	13|T>C|0.153846154	0.993825	-	three_prime_utr	WBGene00019204	H14N18.4
V 8924300	12|T>C|0.916666667	1	-	three_prime_utr	WBGene00019204	H14N18.4
I 1358711	19|A>G|0.263157895	0.999999	+	three_prime_utr	WBGene00022363	Y92H12BL.1
I 1358748	16|A>G|0.8125	1	+	three_prime_utr	WBGene00022363	Y92H12BL.1
I 1358742	16|A>G|0.375	1	+	three_prime_utr	WBGene00022363	Y92H12BL.1
I 1358741	16|A>G|0.625	1	+	three_prime_utr	WBGene00022363	Y92H12BL.1
I 1358740	16|A>G|0.4375	1	+	three_prime_utr	WBGene00022363	Y92H12BL.1
I 1358648	14|A>G|0.214285714	0.999735	+	three_prime_utr	WBGene00022363	Y92H12BL.1
I 1358751	16|A>G|0.875	1	+	three_prime_utr	WBGene00022363	Y92H12BL.1
I 1358752	16|A>G|0.3125	1	+	three_prime_utr	WBGene00022363	Y92H12BL.1
I 1358794	25|A>G|0.12	0.998271	+	three_prime_utr	WBGene00022363	Y92H12BL.1
I 1358788	22|A>G|0.909090909	1	+	three_prime_utr	WBGene00022363	Y92H12BL.1
I 1358787	22|A>G|0.545454545	1	+	three_prime_utr	WBGene00022363	Y92H12BL.1
I 1358771	18|A>G|0.222222222	0.999979	+	three_prime_utr	WBGene00022363	Y92H12BL.1
I 1358767	16|A>G|0.25	0.999988	+	three_prime_utr	WBGene00022363	Y92H12BL.1
I 1358763	16|A>G|0.375	1	+	three_prime_utr	WBGene00022363	Y92H12BL.1
I 1358762	15|A>G|0.266666667	0.999991	+	three_prime_utr	WBGene00022363	Y92H12BL.1
I 1358761	15|A>G|0.333333333	1	+	three_prime_utr	WBGene00022363	Y92H12BL.1
I 1358620	17|A>G|0.470588235	1	+	three_prime_utr	WBGene00022363	Y92H12BL.1
I 1358515	20|A>G|0.4	1	+	three_prime_utr	WBGene00022363	Y92H12BL.1
I 1358514	20|A>G|0.6	1	+	three_prime_utr	WBGene00022363	Y92H12BL.1
X 15671990	73|A>G|0.054794521	0.994003	+	three_prime_utr	WBGene00010329	F59D12.1
I 1358526	19|A>G|0.368421053	1	+	three_prime_utr	WBGene00022363	Y92H12BL.1
I 1358585	18|A>G|0.166666667	0.999388	+	three_prime_utr	WBGene00022363	Y92H12BL.1
I 1358583	17|A>G|0.529411765	1	+	three_prime_utr	WBGene00022363	Y92H12BL.1
I 1358582	17|A>G|0.647058824	1	+	three_prime_utr	WBGene00022363	Y92H12BL.1
I 1358578	18|A>G|0.444444444	1	+	three_prime_utr	WBGene00022363	Y92H12BL.1
I 1358527	20|A>G|0.15	0.999141	+	three_prime_utr	WBGene00022363	Y92H12BL.1
I 1154822	40|T>C|0.55	1	-	three_prime_utr	WBGene00000165	aps-3
I 1154823	40|T>C|0.625	1	-	three_prime_utr	WBGene00000165	aps-3
II 14066041	13|A>G|0.307692308	0.999995	+	three_prime_utr	WBGene00002275	lem-2
II 14066047	14|A>G|0.714285714	1	+	three_prime_utr	WBGene00002275	lem-2
II 14066057	14|A>G|0.142857143	0.992751	+	three_prime_utr	WBGene00002275	lem-2
II 14066064	15|A>G|0.666666667	1	+	three_prime_utr	WBGene00002275	lem-2
I 1154810	48|T>C|0.083333333	0.998734	-	three_prime_utr	WBGene00000165	aps-3
I 1154848	37|T>C|0.108108108	0.999544	-	three_prime_utr	WBGene00000165	aps-3
I 1154846	37|T>C|0.216216216	1	-	three_prime_utr	WBGene00000165	aps-3
I 1154845	37|T>C|0.216216216	1	-	three_prime_utr	WBGene00000165	aps-3
I 1154840	36|T>C|0.527777778	1	-	three_prime_utr	WBGene00000165	aps-3
II 14066075	17|A>G|0.176470588	0.999492	+	three_prime_utr	WBGene00002275	lem-2
I 1154746	57|T>C|0.245614035	1	-	three_prime_utr	WBGene00000165	aps-3
IV 17104398	18|T>C|0.833333333	1	-	three_prime_utr	WBGene00013808	sfa-1
X 13336349	5|A>G|0.4	0.999408	+	three_prime_utr	WBGene00009798	F46G10.4
X 13336359	6|A>G|0.333333333	0.99902	+	three_prime_utr	WBGene00009798	F46G10.4
IV 17104419	15|T>C|0.133333333	0.991599	-	three_prime_utr	WBGene00013808	sfa-1
IV 17104394	17|T>C|0.235294118	0.999983	-	three_prime_utr	WBGene00013808	sfa-1
II 14066128	16|A>G|0.1875	0.999584	+	three_prime_utr	WBGene00002275	lem-2
II 14066130	16|A>G|0.125	0.99037	+	three_prime_utr	WBGene00002275	lem-2
I 1154795	48|T>C|0.208333333	1	-	three_prime_utr	WBGene00000165	aps-3
II 14066153	17|A>G|0.470588235	1	+	three_prime_utr	WBGene00002275	lem-2
I 1154774	47|T>C|0.255319149	1	-	three_prime_utr	WBGene00000165	aps-3
V 65253	7|T>C|0.285714286	0.99854	-	three_prime_utr	WBGene00018976	daam-1
I 1154873	33|T>C|0.242424242	1	-	three_prime_utr	WBGene00000165	aps-3
I 1154865	32|T>C|0.125	0.999746	-	three_prime_utr	WBGene00000165	aps-3
I 1154874	32|T>C|0.09375	0.996354	-	three_prime_utr	WBGene00000165	aps-3
I 1154878	30|T>C|0.966666667	1	-	three_prime_utr	WBGene00000165	aps-3
I 1154922	23|T>C|0.130434783	0.998664	-	three_prime_utr	WBGene00000165	aps-3
I 1154900	24|T>C|0.333333333	1	-	three_prime_utr	WBGene00000165	aps-3
I 1154897	25|T>C|0.12	0.998271	-	three_prime_utr	WBGene00000165	aps-3
I 1154891	29|T>C|0.448275862	1	-	three_prime_utr	WBGene00000165	aps-3
I 1154879	31|T>C|0.709677419	1	-	three_prime_utr	WBGene00000165	aps-3
I 1154863	32|T>C|0.96875	1	-	three_prime_utr	WBGene00000165	aps-3
I 1154858	32|T>C|0.09375	0.996354	-	three_prime_utr	WBGene00000165	aps-3
I 2869631	28|A>G|0.571428571	1	+	three_prime_utr	WBGene00022115	Y71F9AL.10
I 2869454	47|A>G|0.191489362	1	+	three_prime_utr	WBGene00022115	Y71F9AL.10
I 1154861	32|T>C|0.1875	0.999999	-	three_prime_utr	WBGene00000165	aps-3
I 2869441	53|A>G|0.264150943	1	+	three_prime_utr	WBGene00022115	Y71F9AL.10
I 1154725	55|T>C|0.145454545	1	-	three_prime_utr	WBGene00000165	aps-3
V 64647	7|T>C|0.285714286	0.99854	-	three_prime_utr	WBGene00018976	daam-1
I 1154645	56|T>C|0.678571429	1	-	three_prime_utr	WBGene00000165	aps-3
I 1154654	58|T>C|0.172413793	1	-	three_prime_utr	WBGene00000165	aps-3
I 1154651	57|T>C|0.385964912	1	-	three_prime_utr	WBGene00000165	aps-3
I 1154650	57|T>C|0.561403509	1	-	three_prime_utr	WBGene00000165	aps-3
I 1154646	56|T>C|0.160714286	1	-	three_prime_utr	WBGene00000165	aps-3
V 65241	7|T>C|0.571428571	1	-	three_prime_utr	WBGene00018976	daam-1
V 65239	7|T>C|0.285714286	0.99854	-	three_prime_utr	WBGene00018976	daam-1
V 65242	7|T>C|0.285714286	0.99854	-	three_prime_utr	WBGene00018976	daam-1
V 65231	8|T>C|0.75	1	-	three_prime_utr	WBGene00018976	daam-1
I 1154606	43|T>C|0.697674419	1	-	three_prime_utr	WBGene00000165	aps-3
I 1154603	42|T>C|0.380952381	1	-	three_prime_utr	WBGene00000165	aps-3
V 65230	8|T>C|0.75	1	-	three_prime_utr	WBGene00018976	daam-1
X 13336375	5|A>G|0.8	1	+	three_prime_utr	WBGene00009798	F46G10.4
I 1154711	55|T>C|0.527272727	1	-	three_prime_utr	WBGene00000165	aps-3
I 1154709	55|T>C|0.836363636	1	-	three_prime_utr	WBGene00000165	aps-3
I 1154708	55|T>C|0.763636364	1	-	three_prime_utr	WBGene00000165	aps-3
X 13336399	8|A>G|0.25	0.997969	+	three_prime_utr	WBGene00009798	F46G10.4
X 13336361	6|A>G|0.5	0.99999	+	three_prime_utr	WBGene00009798	F46G10.4
I 1154712	55|T>C|0.963636364	1	-	three_prime_utr	WBGene00000165	aps-3
I 1154671	59|T>C|0.220338983	1	-	three_prime_utr	WBGene00000165	aps-3
X 13336453	9|A>G|0.222222222	0.99731	+	three_prime_utr	WBGene00009798	F46G10.4
I 1154703	62|T>C|0.080645161	0.999626	-	three_prime_utr	WBGene00000165	aps-3
I 1154660	58|T>C|0.206896552	1	-	three_prime_utr	WBGene00000165	aps-3
I 1154674	56|T>C|0.178571429	1	-	three_prime_utr	WBGene00000165	aps-3
X 13336439	9|A>G|0.555555556	1	+	three_prime_utr	WBGene00009798	F46G10.4
I 1154702	61|T>C|0.081967213	0.999654	-	three_prime_utr	WBGene00000165	aps-3
I 1154701	61|T>C|0.163934426	1	-	three_prime_utr	WBGene00000165	aps-3
I 1154683	55|T>C|0.072727273	0.997876	-	three_prime_utr	WBGene00000165	aps-3
I 1154923	23|T>C|0.826086957	1	-	three_prime_utr	WBGene00000165	aps-3
I 1154937	19|T>C|0.157894737	0.999271	-	three_prime_utr	WBGene00000165	aps-3
I 3167810	11|A>G|0.272727273	0.999886	+	three_prime_utr	WBGene00021828	Y54E10A.6
I 3167805	11|A>G|0.363636364	0.999998	+	three_prime_utr	WBGene00021828	Y54E10A.6
I 3167804	11|A>G|0.636363636	1	+	three_prime_utr	WBGene00021828	Y54E10A.6
I 3167797	11|A>G|0.181818182	0.995734	+	three_prime_utr	WBGene00021828	Y54E10A.6
I 1155169	50|T>C|0.08	0.99852	-	three_prime_utr	WBGene00000165	aps-3
I 1155168	52|T>C|0.230769231	1	-	three_prime_utr	WBGene00000165	aps-3
I 3167792	11|A>G|0.181818182	0.995734	+	three_prime_utr	WBGene00021828	Y54E10A.6
I 1155162	53|T>C|0.735849057	1	-	three_prime_utr	WBGene00000165	aps-3
I 3167778	11|A>G|0.181818182	0.995734	+	three_prime_utr	WBGene00021828	Y54E10A.6
I 3167777	11|A>G|0.545454545	1	+	three_prime_utr	WBGene00021828	Y54E10A.6
I 3167812	11|A>G|0.545454545	1	+	three_prime_utr	WBGene00021828	Y54E10A.6
I 3167776	11|A>G|0.454545455	1	+	three_prime_utr	WBGene00021828	Y54E10A.6
I 3167843	8|A>G|0.25	0.997969	+	three_prime_utr	WBGene00021828	Y54E10A.6
II 12801751	7|T>C|0.571428571	1	-	three_prime_utr	WBGene00012908	Y46G5A.18
I 3167860	6|A>G|0.833333333	1	+	three_prime_utr	WBGene00021828	Y54E10A.6
I 3167829	11|A>G|0.636363636	1	+	three_prime_utr	WBGene00021828	Y54E10A.6
I 1155161	53|T>C|0.698113208	1	-	three_prime_utr	WBGene00000165	aps-3
II 12802031	8|T>C|0.25	0.997969	-	three_prime_utr	WBGene00012908	Y46G5A.18
I 1155131	62|T>C|0.177419355	1	-	three_prime_utr	WBGene00000165	aps-3
I 3167623	10|A>G|0.7	1	+	three_prime_utr	WBGene00021828	Y54E10A.6
I 3167620	10|A>G|0.4	0.999999	+	three_prime_utr	WBGene00021828	Y54E10A.6
I 3167649	9|A>G|0.222222222	0.99731	+	three_prime_utr	WBGene00021828	Y54E10A.6
I 3167619	10|A>G|0.5	1	+	three_prime_utr	WBGene00021828	Y54E10A.6
I 1155124	60|T>C|0.066666667	0.997062	-	three_prime_utr	WBGene00000165	aps-3
I 3167618	10|A>G|0.2	0.996564	+	three_prime_utr	WBGene00021828	Y54E10A.6
I 3167612	11|A>G|0.636363636	1	+	three_prime_utr	WBGene00021828	Y54E10A.6
I 3167771	11|A>G|0.454545455	1	+	three_prime_utr	WBGene00021828	Y54E10A.6
I 3167761	10|A>G|0.4	0.999999	+	three_prime_utr	WBGene00021828	Y54E10A.6
I 3167750	9|A>G|0.666666667	1	+	three_prime_utr	WBGene00021828	Y54E10A.6
I 3167749	9|A>G|0.555555556	1	+	three_prime_utr	WBGene00021828	Y54E10A.6
I 1155142	64|T>C|0.078125	0.999566	-	three_prime_utr	WBGene00000165	aps-3
I 1155134	62|T>C|0.209677419	1	-	three_prime_utr	WBGene00000165	aps-3
I 1155135	63|T>C|0.285714286	1	-	three_prime_utr	WBGene00000165	aps-3
II 12801716	9|T>C|0.444444444	0.999999	-	three_prime_utr	WBGene00012908	Y46G5A.18
I 1155232	45|T>C|0.222222222	1	-	three_prime_utr	WBGene00000165	aps-3
II 12801717	9|T>C|0.444444444	0.999999	-	three_prime_utr	WBGene00012908	Y46G5A.18
I 1155173	47|T>C|0.638297872	1	-	three_prime_utr	WBGene00000165	aps-3
I 1155276	36|T>C|0.111111111	0.999591	-	three_prime_utr	WBGene00000165	aps-3
I 1155272	39|T>C|0.384615385	1	-	three_prime_utr	WBGene00000165	aps-3
II 12801714	10|T>C|0.2	0.996564	-	three_prime_utr	WBGene00012908	Y46G5A.18
I 1155210	47|T>C|0.234042553	1	-	three_prime_utr	WBGene00000165	aps-3
I 1155194	52|T>C|0.096153846	0.99984	-	three_prime_utr	WBGene00000165	aps-3
II 12801738	8|T>C|0.875	1	-	three_prime_utr	WBGene00012908	Y46G5A.18
I 1155207	48|T>C|0.104166667	0.999892	-	three_prime_utr	WBGene00000165	aps-3
I 1155181	52|T>C|0.269230769	1	-	three_prime_utr	WBGene00000165	aps-3
I 1155174	47|T>C|0.936170213	1	-	three_prime_utr	WBGene00000165	aps-3
I 1155198	46|T>C|0.891304348	1	-	three_prime_utr	WBGene00000165	aps-3
I 1155197	46|T>C|0.804347826	1	-	three_prime_utr	WBGene00000165	aps-3
I 1155046	29|T>C|0.75862069	1	-	three_prime_utr	WBGene00000165	aps-3
I 1155039	27|T>C|0.777777778	1	-	three_prime_utr	WBGene00000165	aps-3
I 1155055	31|T>C|0.806451613	1	-	three_prime_utr	WBGene00000165	aps-3
I 3034067	16|A>G|0.5625	1	+	three_prime_utr	WBGene00021841	Y54E10BR.2
I 3034054	14|A>G|0.285714286	0.999993	+	three_prime_utr	WBGene00021841	Y54E10BR.2
I 1155057	32|T>C|0.3125	1	-	three_prime_utr	WBGene00000165	aps-3
I 3034599	16|A>G|0.125	0.99037	+	three_prime_utr	WBGene00021841	Y54E10BR.2
I 3034032	14|A>G|0.142857143	0.992751	+	three_prime_utr	WBGene00021841	Y54E10BR.2
I 1154985	13|T>C|0.230769231	0.999794	-	three_prime_utr	WBGene00000165	aps-3
I 3033927	15|A>G|0.4	1	+	three_prime_utr	WBGene00021841	Y54E10BR.2
I 1154986	12|T>C|0.166666667	0.99482	-	three_prime_utr	WBGene00000165	aps-3
I 1154938	19|T>C|0.157894737	0.999271	-	three_prime_utr	WBGene00000165	aps-3
I 3033986	17|A>G|0.411764706	1	+	three_prime_utr	WBGene00021841	Y54E10BR.2
I 1154997	13|T>C|0.923076923	1	-	three_prime_utr	WBGene00000165	aps-3
I 3033985	17|A>G|0.352941176	1	+	three_prime_utr	WBGene00021841	Y54E10BR.2
I 3033979	17|A>G|0.823529412	1	+	three_prime_utr	WBGene00021841	Y54E10BR.2
I 3033973	18|A>G|0.444444444	1	+	three_prime_utr	WBGene00021841	Y54E10BR.2
I 1154996	13|T>C|0.769230769	1	-	three_prime_utr	WBGene00000165	aps-3
I 3033950	19|A>G|0.894736842	1	+	three_prime_utr	WBGene00021841	Y54E10BR.2
I 3033941	19|A>G|0.684210526	1	+	three_prime_utr	WBGene00021841	Y54E10BR.2
I 1154987	12|T>C|0.666666667	1	-	three_prime_utr	WBGene00000165	aps-3
I 3034605	15|A>G|0.333333333	1	+	three_prime_utr	WBGene00021841	Y54E10BR.2
I 1155107	57|T>C|0.192982456	1	-	three_prime_utr	WBGene00000165	aps-3
II 12802039	9|T>C|0.222222222	0.99731	-	three_prime_utr	WBGene00012908	Y46G5A.18
I 3167528	15|A>G|0.266666667	0.999991	+	three_prime_utr	WBGene00021828	Y54E10A.6
I 3167525	15|A>G|0.266666667	0.999991	+	three_prime_utr	WBGene00021828	Y54E10A.6
I 3167556	13|A>G|0.153846154	0.993825	+	three_prime_utr	WBGene00021828	Y54E10A.6
I 3167521	16|A>G|0.125	0.99037	+	three_prime_utr	WBGene00021828	Y54E10A.6
II 12802044	9|T>C|0.555555556	1	-	three_prime_utr	WBGene00012908	Y46G5A.18
I 3167503	20|A>G|0.25	0.999999	+	three_prime_utr	WBGene00021828	Y54E10A.6
I 1155109	57|T>C|0.350877193	1	-	three_prime_utr	WBGene00000165	aps-3
I 3167557	13|A>G|0.692307692	1	+	three_prime_utr	WBGene00021828	Y54E10A.6
I 3167607	12|A>G|0.166666667	0.99482	+	three_prime_utr	WBGene00021828	Y54E10A.6
II 12802035	8|T>C|0.875	1	-	three_prime_utr	WBGene00012908	Y46G5A.18
I 3167602	12|A>G|0.75	1	+	three_prime_utr	WBGene00021828	Y54E10A.6
I 3167580	12|A>G|0.583333333	1	+	three_prime_utr	WBGene00021828	Y54E10A.6
I 1155110	58|T>C|0.103448276	0.999977	-	three_prime_utr	WBGene00000165	aps-3
I 3167560	14|A>G|0.642857143	1	+	three_prime_utr	WBGene00021828	Y54E10A.6
I 1155097	53|T>C|0.339622642	1	-	three_prime_utr	WBGene00000165	aps-3
I 1155080	43|T>C|0.697674419	1	-	three_prime_utr	WBGene00000165	aps-3
II 12802054	9|T>C|0.333333333	0.999946	-	three_prime_utr	WBGene00012908	Y46G5A.18
I 1155091	49|T>C|0.102040816	0.99988	-	three_prime_utr	WBGene00000165	aps-3
I 1155079	43|T>C|0.139534884	0.999996	-	three_prime_utr	WBGene00000165	aps-3
I 1155087	48|T>C|0.083333333	0.998734	-	three_prime_utr	WBGene00000165	aps-3
I 1155086	48|T>C|0.166666667	1	-	three_prime_utr	WBGene00000165	aps-3
III 850416	42|A>G|0.166666667	1	+	three_prime_utr	WBGene00019326	K02F3.2
II 13487253	17|T>C|0.411764706	1	-	three_prime_utr	WBGene00000113	alh-7
II 13487246	15|T>C|0.266666667	0.999991	-	three_prime_utr	WBGene00000113	alh-7
I 2076745	36|A>G|0.083333333	0.994846	+	three_prime_utr	WBGene00021351	Y37E3.10
I 2076735	35|A>G|0.371428571	1	+	three_prime_utr	WBGene00021351	Y37E3.10
II 13487270	18|T>C|0.833333333	1	-	three_prime_utr	WBGene00000113	alh-7
II 13487269	18|T>C|0.277777778	0.999999	-	three_prime_utr	WBGene00000113	alh-7
I 2076767	44|A>G|0.431818182	1	+	three_prime_utr	WBGene00021351	Y37E3.10
III 256795	15|A>G|0.133333333	0.991599	+	three_prime_utr	WBGene00021753	Y50D7A.3
III 3494097	12|T>C|0.333333333	0.999997	-	three_prime_utr	WBGene00010815	M01F1.9
II 13487374	30|T>C|0.1	0.996992	-	three_prime_utr	WBGene00000113	alh-7
I 2033879	62|A>G|0.096774194	0.999965	+	three_prime_utr	WBGene00021237	crtc-1
I 659863	7|T>C|0.571428571	1	-	three_prime_utr	WBGene00022031	Y65B4A.8
I 2033878	62|A>G|0.693548387	1	+	three_prime_utr	WBGene00021237	crtc-1
I 2033881	61|A>G|0.114754098	0.999998	+	three_prime_utr	WBGene00021237	crtc-1
III 3061625	25|T>C|0.4	1	-	three_prime_utr	WBGene00019170	H06I04.6
II 13487386	32|T>C|0.4375	1	-	three_prime_utr	WBGene00000113	alh-7
II 13487373	30|T>C|0.1	0.996992	-	three_prime_utr	WBGene00000113	alh-7
II 13487364	27|T>C|0.518518519	1	-	three_prime_utr	WBGene00000113	alh-7
I 659884	8|T>C|0.5	1	-	three_prime_utr	WBGene00022031	Y65B4A.8
I 2033911	40|A>G|0.125	0.999957	+	three_prime_utr	WBGene00021237	crtc-1
I 659883	8|T>C|0.5	1	-	three_prime_utr	WBGene00022031	Y65B4A.8
I 2033888	56|A>G|0.357142857	1	+	three_prime_utr	WBGene00021237	crtc-1
III 3061598	19|T>C|0.210526316	0.999973	-	three_prime_utr	WBGene00019170	H06I04.6
II 13487402	36|T>C|0.166666667	0.999999	-	three_prime_utr	WBGene00000113	alh-7
I 631011	27|T>C|0.481481481	1	-	three_prime_utr	WBGene00022029	Y65B4A.6
I 659757	5|T>C|0.6	0.999996	-	three_prime_utr	WBGene00022031	Y65B4A.8
I 659747	6|T>C|0.333333333	0.99902	-	three_prime_utr	WBGene00022031	Y65B4A.8
I 659901	10|T>C|0.2	0.996564	-	three_prime_utr	WBGene00022031	Y65B4A.8
II 13487282	21|T>C|0.142857143	0.998996	-	three_prime_utr	WBGene00000113	alh-7
II 13487303	26|T>C|0.192307692	0.999996	-	three_prime_utr	WBGene00000113	alh-7
II 13487278	21|T>C|0.142857143	0.998996	-	three_prime_utr	WBGene00000113	alh-7
I 2076702	28|A>G|0.321428571	1	+	three_prime_utr	WBGene00021351	Y37E3.10
I 2076697	28|A>G|0.214285714	1	+	three_prime_utr	WBGene00021351	Y37E3.10
II 13487363	27|T>C|0.555555556	1	-	three_prime_utr	WBGene00000113	alh-7
I 659918	12|T>C|0.25	0.999845	-	three_prime_utr	WBGene00022031	Y65B4A.8
I 659916	12|T>C|0.166666667	0.99482	-	three_prime_utr	WBGene00022031	Y65B4A.8
I 659907	10|T>C|0.9	1	-	three_prime_utr	WBGene00022031	Y65B4A.8
I 2076362	46|A>G|0.239130435	1	+	three_prime_utr	WBGene00021351	Y37E3.10
I 2076390	43|A>G|0.069767442	0.991416	+	three_prime_utr	WBGene00021351	Y37E3.10
II 13487357	28|T>C|0.357142857	1	-	three_prime_utr	WBGene00000113	alh-7
I 2076388	45|A>G|0.244444444	1	+	three_prime_utr	WBGene00021351	Y37E3.10
I 2076368	46|A>G|0.108695652	0.999912	+	three_prime_utr	WBGene00021351	Y37E3.10
I 659919	13|T>C|0.230769231	0.999794	-	three_prime_utr	WBGene00022031	Y65B4A.8
I 2076364	46|A>G|0.869565217	1	+	three_prime_utr	WBGene00021351	Y37E3.10
I 2076363	46|A>G|0.934782609	1	+	three_prime_utr	WBGene00021351	Y37E3.10
I 2296735	87|A>G|0.126436782	1	+	three_prime_utr	WBGene00021469	Y39G10AR.11
I 2296731	89|A>G|0.08988764	0.999997	+	three_prime_utr	WBGene00021469	Y39G10AR.11
I 2296730	88|A>G|0.090909091	0.999997	+	three_prime_utr	WBGene00021469	Y39G10AR.11
V 65270	9|T>C|0.222222222	0.99731	-	three_prime_utr	WBGene00018976	daam-1
V 65324	15|T>C|0.266666667	0.999991	-	three_prime_utr	WBGene00018976	daam-1
V 65322	15|T>C|0.133333333	0.991599	-	three_prime_utr	WBGene00018976	daam-1
V 65295	10|T>C|0.2	0.996564	-	three_prime_utr	WBGene00018976	daam-1
V 65325	15|T>C|0.4	1	-	three_prime_utr	WBGene00018976	daam-1
III 9513199	65|A>G|0.061538462	0.996056	+	three_prime_utr	WBGene00010131	F55H2.5
V 1288902	37|T>C|0.27027027	1	-	three_prime_utr	WBGene00001171	egl-2
V 1289518	58|T>C|0.103448276	0.999977	-	three_prime_utr	WBGene00001171	egl-2
V 1289479	54|T>C|0.388888889	1	-	three_prime_utr	WBGene00001171	egl-2
V 1289485	53|T>C|0.754716981	1	-	three_prime_utr	WBGene00001171	egl-2
V 1289486	53|T>C|0.566037736	1	-	three_prime_utr	WBGene00001171	egl-2
V 1289496	57|T>C|0.666666667	1	-	three_prime_utr	WBGene00001171	egl-2
V 1289503	58|T>C|0.086206897	0.999728	-	three_prime_utr	WBGene00001171	egl-2
V 1289508	55|T>C|0.872727273	1	-	three_prime_utr	WBGene00001171	egl-2
V 1289519	57|T>C|0.105263158	0.999979	-	three_prime_utr	WBGene00001171	egl-2
V 1289447	46|T>C|0.826086957	1	-	three_prime_utr	WBGene00001171	egl-2
V 1289524	56|T>C|0.464285714	1	-	three_prime_utr	WBGene00001171	egl-2
V 1289468	47|T>C|0.744680851	1	-	three_prime_utr	WBGene00001171	egl-2
V 1289430	43|T>C|0.162790698	1	-	three_prime_utr	WBGene00001171	egl-2
V 1289395	29|T>C|0.620689655	1	-	three_prime_utr	WBGene00001171	egl-2
V 1289379	31|T>C|0.129032258	0.999777	-	three_prime_utr	WBGene00001171	egl-2
V 1289389	33|T>C|0.181818182	0.999999	-	three_prime_utr	WBGene00001171	egl-2
V 1289390	33|T>C|0.090909091	0.996007	-	three_prime_utr	WBGene00001171	egl-2
V 1289391	32|T>C|0.15625	0.999986	-	three_prime_utr	WBGene00001171	egl-2
V 1289394	29|T>C|0.793103448	1	-	three_prime_utr	WBGene00001171	egl-2
V 1289404	32|T>C|0.375	1	-	three_prime_utr	WBGene00001171	egl-2
V 1289407	31|T>C|0.290322581	1	-	three_prime_utr	WBGene00001171	egl-2
V 1289428	41|T>C|0.097560976	0.999314	-	three_prime_utr	WBGene00001171	egl-2
I 2296703	96|A>G|0.708333333	1	+	three_prime_utr	WBGene00021469	Y39G10AR.11
I 2296700	97|A>G|0.298969072	1	+	three_prime_utr	WBGene00021469	Y39G10AR.11
I 2296697	95|A>G|0.442105263	1	+	three_prime_utr	WBGene00021469	Y39G10AR.11
I 2296727	89|A>G|0.393258427	1	+	three_prime_utr	WBGene00021469	Y39G10AR.11
I 2296726	89|A>G|0.078651685	0.999969	+	three_prime_utr	WBGene00021469	Y39G10AR.11
I 2296719	92|A>G|0.434782609	1	+	three_prime_utr	WBGene00021469	Y39G10AR.11
I 2296715	95|A>G|0.115789474	1	+	three_prime_utr	WBGene00021469	Y39G10AR.11
I 2296711	96|A>G|0.34375	1	+	three_prime_utr	WBGene00021469	Y39G10AR.11
I 2296689	97|A>G|0.18556701	1	+	three_prime_utr	WBGene00021469	Y39G10AR.11
I 2296688	97|A>G|0.257731959	1	+	three_prime_utr	WBGene00021469	Y39G10AR.11
I 2296686	96|A>G|0.322916667	1	+	three_prime_utr	WBGene00021469	Y39G10AR.11
I 12810098	20|T>C|0.2	0.999966	-	five_prime_utr	WBGene00012475	Y18D10A.2
II 3211179	13|A>G|0.153846154	0.993825	+	five_prime_utr	WBGene00022568	ZC239.5
II 3211160	14|A>G|0.142857143	0.992751	+	five_prime_utr	WBGene00022568	ZC239.5
II 3211159	14|A>G|0.428571429	1	+	five_prime_utr	WBGene00022568	ZC239.5
II 3211123	13|A>G|0.153846154	0.993825	+	five_prime_utr	WBGene00022568	ZC239.5
II 3210857	19|A>G|0.210526316	0.999973	+	five_prime_utr	WBGene00022568	ZC239.5
I 12810001	13|T>C|0.230769231	0.999794	-	five_prime_utr	WBGene00012475	Y18D10A.2
I 13360421	5|T>C|0.4	0.999408	-	three_prime_utr	WBGene00012735	sptf-3
III 10405655	11|T>C|0.181818182	0.995734	-	three_prime_utr	WBGene00044069	hat-1
I 10639333	37|T>C|0.27027027	1	-	three_prime_utr	WBGene00015235	cdc-26
III 11961750	17|T>C|0.176470588	0.999492	-	three_prime_utr	WBGene00013240	Y56A3A.28
III 11961751	17|T>C|0.235294118	0.999983	-	three_prime_utr	WBGene00013240	Y56A3A.28
III 11961752	17|T>C|0.647058824	1	-	three_prime_utr	WBGene00013240	Y56A3A.28
III 11961756	16|T>C|0.125	0.99037	-	three_prime_utr	WBGene00013240	Y56A3A.28
X 7144770	5|T>C|0.4	0.999408	-	three_prime_utr	WBGene00016913	lam-2
II 3210828	17|A>G|0.470588235	1	+	five_prime_utr	WBGene00022568	ZC239.5
II 3210827	17|A>G|0.411764706	1	+	five_prime_utr	WBGene00022568	ZC239.5
IV 4199552	11|T>C|0.181818182	0.995734	-	three_prime_utr	WBGene00003938	pax-2
V 2646458	14|A>G|0.214285714	0.999735	+	three_prime_utr	WBGene00020957	W02H5.2
V 995927	7|A>G|0.285714286	0.99854	+	three_prime_utr	WBGene00006770	unc-34
V 996196	12|A>G|0.166666667	0.99482	+	three_prime_utr	WBGene00006770	unc-34
V 996189	11|A>G|0.818181818	1	+	three_prime_utr	WBGene00006770	unc-34
V 996188	11|A>G|0.181818182	0.995734	+	three_prime_utr	WBGene00006770	unc-34
V 686214	6|A>G|0.5	0.99999	+	three_prime_utr	WBGene00017957	F31F4.1
V 686213	6|A>G|0.333333333	0.99902	+	three_prime_utr	WBGene00017957	F31F4.1
V 686212	6|A>G|0.333333333	0.99902	+	three_prime_utr	WBGene00017957	F31F4.1
V 686192	7|A>G|0.571428571	1	+	three_prime_utr	WBGene00017957	F31F4.1
V 686191	7|A>G|0.428571429	0.99998	+	three_prime_utr	WBGene00017957	F31F4.1
V 686190	7|A>G|0.857142857	1	+	three_prime_utr	WBGene00017957	F31F4.1
V 911191	6|A>G|0.333333333	0.99902	+	three_prime_utr	WBGene00019241	H24K24.4
V 911184	6|A>G|0.333333333	0.99902	+	three_prime_utr	WBGene00019241	H24K24.4
V 911081	23|A>G|0.173913043	0.999937	+	three_prime_utr	WBGene00019241	H24K24.4
III 11961788	19|T>C|0.263157895	0.999999	-	three_prime_utr	WBGene00013240	Y56A3A.28
I 10819241	88|A>G|0.215909091	1	+	three_prime_utr	WBGene00016458	C35E7.6
II 10788206	9|T>C|0.444444444	0.999999	-	three_prime_utr	WBGene00011067	vps-11
I 10819249	86|A>G|0.965116279	1	+	three_prime_utr	WBGene00016458	C35E7.6
I 10819273	82|A>G|0.109756098	1	+	three_prime_utr	WBGene00016458	C35E7.6
I 10819279	77|A>G|0.467532468	1	+	three_prime_utr	WBGene00016458	C35E7.6
I 10819280	77|A>G|0.649350649	1	+	three_prime_utr	WBGene00016458	C35E7.6
I 10819281	76|A>G|0.157894737	1	+	three_prime_utr	WBGene00016458	C35E7.6
I 10819285	75|A>G|0.266666667	1	+	three_prime_utr	WBGene00016458	C35E7.6
I 10819287	73|A>G|0.616438356	1	+	three_prime_utr	WBGene00016458	C35E7.6
I 10819293	76|A>G|0.171052632	1	+	three_prime_utr	WBGene00016458	C35E7.6
I 12749070	18|A>G|0.166666667	0.999388	+	three_prime_utr	WBGene00006700	uba-2
I 10819298	79|A>G|0.139240506	1	+	three_prime_utr	WBGene00016458	C35E7.6
I 12749057	17|A>G|0.176470588	0.999492	+	three_prime_utr	WBGene00006700	uba-2
I 10819300	78|A>G|0.141025641	1	+	three_prime_utr	WBGene00016458	C35E7.6
I 10819197	79|A>G|0.569620253	1	+	three_prime_utr	WBGene00016458	C35E7.6
I 10819198	82|A>G|0.231707317	1	+	three_prime_utr	WBGene00016458	C35E7.6
I 10819199	82|A>G|0.158536585	1	+	three_prime_utr	WBGene00016458	C35E7.6
I 10819204	82|A>G|0.073170732	0.999829	+	three_prime_utr	WBGene00016458	C35E7.6
I 10819207	81|A>G|0.296296296	1	+	three_prime_utr	WBGene00016458	C35E7.6
I 10819209	82|A>G|0.109756098	1	+	three_prime_utr	WBGene00016458	C35E7.6
I 10819222	87|A>G|0.206896552	1	+	three_prime_utr	WBGene00016458	C35E7.6
I 10819232	92|A>G|0.130434783	1	+	three_prime_utr	WBGene00016458	C35E7.6
I 10819235	92|A>G|0.25	1	+	three_prime_utr	WBGene00016458	C35E7.6
I 10819240	88|A>G|0.272727273	1	+	three_prime_utr	WBGene00016458	C35E7.6
I 10819299	78|A>G|0.230769231	1	+	three_prime_utr	WBGene00016458	C35E7.6
III 11961789	18|T>C|0.722222222	1	-	three_prime_utr	WBGene00013240	Y56A3A.28
I 10819367	74|A>G|0.054054054	0.993705	+	three_prime_utr	WBGene00016458	C35E7.6
I 10819385	76|A>G|0.210526316	1	+	three_prime_utr	WBGene00016458	C35E7.6
I 10819391	73|A>G|0.410958904	1	+	three_prime_utr	WBGene00016458	C35E7.6
I 10819392	72|A>G|0.888888889	1	+	three_prime_utr	WBGene00016458	C35E7.6
I 10819393	76|A>G|0.157894737	1	+	three_prime_utr	WBGene00016458	C35E7.6
I 10819395	76|A>G|0.065789474	0.999034	+	three_prime_utr	WBGene00016458	C35E7.6
I 10819399	79|A>G|0.088607595	0.999986	+	three_prime_utr	WBGene00016458	C35E7.6
I 10819400	78|A>G|0.384615385	1	+	three_prime_utr	WBGene00016458	C35E7.6
I 10819366	75|A>G|0.106666667	0.999999	+	three_prime_utr	WBGene00016458	C35E7.6
I 10819365	76|A>G|0.092105263	0.999989	+	three_prime_utr	WBGene00016458	C35E7.6
I 10819302	78|A>G|0.179487179	1	+	three_prime_utr	WBGene00016458	C35E7.6
I 12749030	10|A>G|0.2	0.996564	+	three_prime_utr	WBGene00006700	uba-2
I 10819307	71|A>G|0.450704225	1	+	three_prime_utr	WBGene00016458	C35E7.6
I 10819308	72|A>G|0.166666667	1	+	three_prime_utr	WBGene00016458	C35E7.6
I 10819309	73|A>G|0.260273973	1	+	three_prime_utr	WBGene00016458	C35E7.6
I 12748892	13|A>G|0.153846154	0.993825	+	three_prime_utr	WBGene00006700	uba-2
I 10819310	73|A>G|0.205479452	1	+	three_prime_utr	WBGene00016458	C35E7.6
I 10819314	73|A>G|0.931506849	1	+	three_prime_utr	WBGene00016458	C35E7.6
I 10819330	67|A>G|0.47761194	1	+	three_prime_utr	WBGene00016458	C35E7.6
I 10819332	65|A>G|0.2	1	+	three_prime_utr	WBGene00016458	C35E7.6
I 10819352	69|A>G|0.246376812	1	+	three_prime_utr	WBGene00016458	C35E7.6
I 12748775	15|A>G|0.466666667	1	+	three_prime_utr	WBGene00006700	uba-2
I 10819353	70|A>G|0.285714286	1	+	three_prime_utr	WBGene00016458	C35E7.6
I 12748774	14|A>G|0.214285714	0.999735	+	three_prime_utr	WBGene00006700	uba-2
I 10819354	70|A>G|0.285714286	1	+	three_prime_utr	WBGene00016458	C35E7.6
I 10819355	70|A>G|0.142857143	1	+	three_prime_utr	WBGene00016458	C35E7.6
I 10819361	75|A>G|0.093333333	0.99999	+	three_prime_utr	WBGene00016458	C35E7.6
I 10819196	79|A>G|0.139240506	1	+	three_prime_utr	WBGene00016458	C35E7.6
I 10819156	80|A>G|0.325	1	+	three_prime_utr	WBGene00016458	C35E7.6
I 10819158	81|A>G|0.296296296	1	+	three_prime_utr	WBGene00016458	C35E7.6
I 10819180	79|A>G|0.53164557	1	+	three_prime_utr	WBGene00016458	C35E7.6
I 10819182	78|A>G|0.076923077	0.999871	+	three_prime_utr	WBGene00016458	C35E7.6
I 10819194	78|A>G|0.705128205	1	+	three_prime_utr	WBGene00016458	C35E7.6
I 10819195	79|A>G|0.189873418	1	+	three_prime_utr	WBGene00016458	C35E7.6
I 10819417	86|A>G|0.302325581	1	+	three_prime_utr	WBGene00016458	C35E7.6
IV 12826973	14|A>G|0.428571429	1	+	three_prime_utr	WBGene00008555	F07C6.4
I 10819897	93|A>G|0.182795699	1	+	three_prime_utr	WBGene00016458	C35E7.6
I 10819911	84|A>G|0.154761905	1	+	three_prime_utr	WBGene00016458	C35E7.6
I 10819912	85|A>G|0.176470588	1	+	three_prime_utr	WBGene00016458	C35E7.6
I 10819938	80|A>G|0.0625	0.99878	+	three_prime_utr	WBGene00016458	C35E7.6
I 10819939	78|A>G|0.269230769	1	+	three_prime_utr	WBGene00016458	C35E7.6
I 10819940	78|A>G|0.346153846	1	+	three_prime_utr	WBGene00016458	C35E7.6
I 10819728	98|A>G|0.163265306	1	+	three_prime_utr	WBGene00016458	C35E7.6
I 10819732	100|A>G|0.47	1	+	three_prime_utr	WBGene00016458	C35E7.6
I 10819737	100|A>G|0.12	1	+	three_prime_utr	WBGene00016458	C35E7.6
I 10819741	102|A>G|0.156862745	1	+	three_prime_utr	WBGene00016458	C35E7.6
I 10819760	102|A>G|0.235294118	1	+	three_prime_utr	WBGene00016458	C35E7.6
I 10819761	102|A>G|0.264705882	1	+	three_prime_utr	WBGene00016458	C35E7.6
I 10819769	95|A>G|0.368421053	1	+	three_prime_utr	WBGene00016458	C35E7.6
I 10819770	95|A>G|0.494736842	1	+	three_prime_utr	WBGene00016458	C35E7.6
I 10819941	77|A>G|0.324675325	1	+	three_prime_utr	WBGene00016458	C35E7.6
I 10819943	75|A>G|0.92	1	+	three_prime_utr	WBGene00016458	C35E7.6
I 10819963	68|A>G|0.073529412	0.999423	+	three_prime_utr	WBGene00016458	C35E7.6
I 10819504	101|A>G|0.732673267	1	+	three_prime_utr	WBGene00016458	C35E7.6
I 10819506	102|A>G|0.147058824	1	+	three_prime_utr	WBGene00016458	C35E7.6
I 10819518	97|A>G|0.536082474	1	+	three_prime_utr	WBGene00016458	C35E7.6
I 10819519	97|A>G|0.06185567	0.99957	+	three_prime_utr	WBGene00016458	C35E7.6
I 10819522	98|A>G|0.265306122	1	+	three_prime_utr	WBGene00016458	C35E7.6
I 10819530	101|A>G|0.118811881	1	+	three_prime_utr	WBGene00016458	C35E7.6
I 10819532	102|A>G|0.107843137	1	+	three_prime_utr	WBGene00016458	C35E7.6
I 10819533	103|A>G|0.213592233	1	+	three_prime_utr	WBGene00016458	C35E7.6
I 10819544	105|A>G|0.20952381	1	+	three_prime_utr	WBGene00016458	C35E7.6
I 10819550	105|A>G|0.085714286	0.999999	+	three_prime_utr	WBGene00016458	C35E7.6
I 10819555	104|A>G|0.086538462	0.999999	+	three_prime_utr	WBGene00016458	C35E7.6
I 10819724	97|A>G|0.06185567	0.99957	+	three_prime_utr	WBGene00016458	C35E7.6
I 10819419	86|A>G|0.058139535	0.998309	+	three_prime_utr	WBGene00016458	C35E7.6
I 10819453	90|A>G|0.055555556	0.99793	+	three_prime_utr	WBGene00016458	C35E7.6
I 10819454	90|A>G|0.055555556	0.99793	+	three_prime_utr	WBGene00016458	C35E7.6
I 10819463	91|A>G|0.736263736	1	+	three_prime_utr	WBGene00016458	C35E7.6
I 10819464	91|A>G|0.054945055	0.997826	+	three_prime_utr	WBGene00016458	C35E7.6
I 10819473	98|A>G|0.367346939	1	+	three_prime_utr	WBGene00016458	C35E7.6
I 10819480	102|A>G|0.18627451	1	+	three_prime_utr	WBGene00016458	C35E7.6
I 10819484	102|A>G|0.676470588	1	+	three_prime_utr	WBGene00016458	C35E7.6
I 10819485	103|A>G|0.155339806	1	+	three_prime_utr	WBGene00016458	C35E7.6
I 10819487	103|A>G|0.116504854	1	+	three_prime_utr	WBGene00016458	C35E7.6
I 10819488	105|A>G|0.114285714	1	+	three_prime_utr	WBGene00016458	C35E7.6
I 10819496	105|A>G|0.104761905	1	+	three_prime_utr	WBGene00016458	C35E7.6
I 10819560	105|A>G|0.104761905	1	+	three_prime_utr	WBGene00016458	C35E7.6
I 10819565	102|A>G|0.215686275	1	+	three_prime_utr	WBGene00016458	C35E7.6
I 10819622	96|A>G|0.25	1	+	three_prime_utr	WBGene00016458	C35E7.6
I 10819633	96|A>G|0.166666667	1	+	three_prime_utr	WBGene00016458	C35E7.6
I 12043889	19|A>G|0.210526316	0.999973	+	three_prime_utr	WBGene00010244	F58D5.5
I 10819636	98|A>G|0.510204082	1	+	three_prime_utr	WBGene00016458	C35E7.6
I 10819642	97|A>G|0.690721649	1	+	three_prime_utr	WBGene00016458	C35E7.6
I 10819656	93|A>G|0.935483871	1	+	three_prime_utr	WBGene00016458	C35E7.6
I 10819667	94|A>G|0.787234043	1	+	three_prime_utr	WBGene00016458	C35E7.6
I 10819680	100|A>G|0.06	0.999493	+	three_prime_utr	WBGene00016458	C35E7.6
I 10819683	99|A>G|0.080808081	0.999993	+	three_prime_utr	WBGene00016458	C35E7.6
I 10819691	97|A>G|0.06185567	0.99957	+	three_prime_utr	WBGene00016458	C35E7.6
I 10819693	95|A>G|0.842105263	1	+	three_prime_utr	WBGene00016458	C35E7.6
I 10819697	96|A>G|0.052083333	0.997248	+	three_prime_utr	WBGene00016458	C35E7.6
I 10819698	96|A>G|0.354166667	1	+	three_prime_utr	WBGene00016458	C35E7.6
I 10819721	96|A>G|0.989583333	1	+	three_prime_utr	WBGene00016458	C35E7.6
I 10819620	96|A>G|0.166666667	1	+	three_prime_utr	WBGene00016458	C35E7.6
I 10819619	97|A>G|0.051546392	0.997121	+	three_prime_utr	WBGene00016458	C35E7.6
I 10819580	93|A>G|0.612903226	1	+	three_prime_utr	WBGene00016458	C35E7.6
I 10819581	93|A>G|0.537634409	1	+	three_prime_utr	WBGene00016458	C35E7.6
I 10819583	94|A>G|0.085106383	0.999995	+	three_prime_utr	WBGene00016458	C35E7.6
I 10819584	95|A>G|0.315789474	1	+	three_prime_utr	WBGene00016458	C35E7.6
I 10819586	95|A>G|0.210526316	1	+	three_prime_utr	WBGene00016458	C35E7.6
I 10819595	94|A>G|0.117021277	1	+	three_prime_utr	WBGene00016458	C35E7.6
I 10819596	93|A>G|0.161290323	1	+	three_prime_utr	WBGene00016458	C35E7.6
I 10819607	98|A>G|0.153061224	1	+	three_prime_utr	WBGene00016458	C35E7.6
I 10819616	97|A>G|0.103092784	1	+	three_prime_utr	WBGene00016458	C35E7.6
III 11961793	18|T>C|0.222222222	0.999979	-	three_prime_utr	WBGene00013240	Y56A3A.28
III 11961794	18|T>C|0.166666667	0.999388	-	three_prime_utr	WBGene00013240	Y56A3A.28
III 11961795	18|T>C|0.388888889	1	-	three_prime_utr	WBGene00013240	Y56A3A.28
I 11925203	23|T>C|0.391304348	1	-	three_prime_utr	WBGene00006958	wve-1
I 11924791	12|T>C|0.416666667	1	-	three_prime_utr	WBGene00006958	wve-1
III 12671432	16|T>C|0.125	0.99037	-	three_prime_utr	WBGene00006389	taf-7.2
III 12671434	16|T>C|0.3125	1	-	three_prime_utr	WBGene00006389	taf-7.2
III 12671437	16|T>C|0.3125	1	-	three_prime_utr	WBGene00006389	taf-7.2
III 12671438	16|T>C|0.3125	1	-	three_prime_utr	WBGene00006389	taf-7.2
III 12671442	16|T>C|0.3125	1	-	three_prime_utr	WBGene00006389	taf-7.2
III 12671444	16|T>C|0.25	0.999988	-	three_prime_utr	WBGene00006389	taf-7.2
III 12671462	22|T>C|0.409090909	1	-	three_prime_utr	WBGene00006389	taf-7.2
III 12671463	22|T>C|0.181818182	0.999948	-	three_prime_utr	WBGene00006389	taf-7.2
V 20251684	9|T>C|0.333333333	0.999946	-	three_prime_utr	WBGene00007017	mdt-17
V 4627799	15|A>G|0.133333333	0.991599	+	three_prime_utr	WBGene00018812	sumv-2
V 20251765	6|T>C|0.333333333	0.99902	-	three_prime_utr	WBGene00007017	mdt-17
V 4627798	15|A>G|0.2	0.999665	+	three_prime_utr	WBGene00018812	sumv-2
V 20251833	7|T>C|0.428571429	0.99998	-	three_prime_utr	WBGene00007017	mdt-17
V 4627813	8|A>G|0.375	0.999966	+	three_prime_utr	WBGene00018812	sumv-2
V 4627814	8|A>G|0.625	1	+	three_prime_utr	WBGene00018812	sumv-2
V 4627808	11|A>G|0.454545455	1	+	three_prime_utr	WBGene00018812	sumv-2
V 20251637	11|T>C|0.181818182	0.995734	-	three_prime_utr	WBGene00007017	mdt-17
V 19927842	15|T>C|0.133333333	0.991599	-	three_prime_utr	WBGene00013362	Y60A3A.14
V 4627770	16|A>G|0.625	1	+	three_prime_utr	WBGene00018812	sumv-2
V 20251762	5|T>C|0.6	0.999996	-	three_prime_utr	WBGene00007017	mdt-17
V 4627759	16|A>G|0.1875	0.999584	+	three_prime_utr	WBGene00018812	sumv-2
V 4627895	7|A>G|0.285714286	0.99854	+	three_prime_utr	WBGene00018812	sumv-2
V 20251834	7|T>C|0.571428571	1	-	three_prime_utr	WBGene00007017	mdt-17
V 20251634	12|T>C|0.5	1	-	three_prime_utr	WBGene00007017	mdt-17
V 4627784	16|A>G|0.375	1	+	three_prime_utr	WBGene00018812	sumv-2
V 20251636	11|T>C|0.363636364	0.999998	-	three_prime_utr	WBGene00007017	mdt-17
V 4627771	16|A>G|0.375	1	+	three_prime_utr	WBGene00018812	sumv-2
V 4627782	16|A>G|0.3125	1	+	three_prime_utr	WBGene00018812	sumv-2
V 4627841	6|A>G|0.5	0.99999	+	three_prime_utr	WBGene00018812	sumv-2
V 4628309	34|A>G|0.235294118	1	+	three_prime_utr	WBGene00018812	sumv-2
V 20251683	9|T>C|0.444444444	0.999999	-	three_prime_utr	WBGene00007017	mdt-17
V 20251660	10|T>C|0.4	0.999999	-	three_prime_utr	WBGene00007017	mdt-17
V 20251679	10|T>C|0.2	0.996564	-	three_prime_utr	WBGene00007017	mdt-17
V 4628319	35|A>G|0.114285714	0.999635	+	three_prime_utr	WBGene00018812	sumv-2
V 20251673	10|T>C|0.5	1	-	three_prime_utr	WBGene00007017	mdt-17
V 20251813	6|T>C|0.833333333	1	-	three_prime_utr	WBGene00007017	mdt-17
V 4627840	6|A>G|0.666666667	1	+	three_prime_utr	WBGene00018812	sumv-2
V 20251674	10|T>C|0.8	1	-	three_prime_utr	WBGene00007017	mdt-17
V 4628317	35|A>G|0.4	1	+	three_prime_utr	WBGene00018812	sumv-2
V 20251678	10|T>C|0.3	0.99992	-	three_prime_utr	WBGene00007017	mdt-17
V 20251823	7|T>C|0.571428571	1	-	three_prime_utr	WBGene00007017	mdt-17
V 4628318	35|A>G|0.257142857	1	+	three_prime_utr	WBGene00018812	sumv-2
V 20251647	11|T>C|0.363636364	0.999998	-	three_prime_utr	WBGene00007017	mdt-17
V 4628304	33|A>G|0.363636364	1	+	three_prime_utr	WBGene00018812	sumv-2
V 4627822	8|A>G|0.25	0.997969	+	three_prime_utr	WBGene00018812	sumv-2
V 4627839	6|A>G|0.5	0.99999	+	three_prime_utr	WBGene00018812	sumv-2
V 20251824	7|T>C|0.571428571	1	-	three_prime_utr	WBGene00007017	mdt-17
V 20251649	11|T>C|0.181818182	0.995734	-	three_prime_utr	WBGene00007017	mdt-17
V 2646501	15|A>G|0.133333333	0.991599	+	three_prime_utr	WBGene00020957	W02H5.2
V 2646508	13|A>G|0.384615385	1	+	three_prime_utr	WBGene00020957	W02H5.2
V 2646512	14|A>G|0.357142857	1	+	three_prime_utr	WBGene00020957	W02H5.2
V 19927833	13|T>C|0.461538462	1	-	three_prime_utr	WBGene00013362	Y60A3A.14
V 2646522	13|A>G|0.230769231	0.999794	+	three_prime_utr	WBGene00020957	W02H5.2
V 2646500	15|A>G|0.2	0.999665	+	three_prime_utr	WBGene00020957	W02H5.2
V 4627710	26|A>G|0.923076923	1	+	three_prime_utr	WBGene00018812	sumv-2
V 4627711	27|A>G|0.444444444	1	+	three_prime_utr	WBGene00018812	sumv-2
V 4628228	14|A>G|0.357142857	1	+	three_prime_utr	WBGene00018812	sumv-2
V 19927809	8|T>C|0.25	0.997969	-	three_prime_utr	WBGene00013362	Y60A3A.14
V 20251752	5|T>C|0.4	0.999408	-	three_prime_utr	WBGene00007017	mdt-17
V 2646531	13|A>G|0.769230769	1	+	three_prime_utr	WBGene00020957	W02H5.2
V 20251856	10|T>C|0.2	0.996564	-	three_prime_utr	WBGene00007017	mdt-17
V 4627723	25|A>G|0.6	1	+	three_prime_utr	WBGene00018812	sumv-2
V 20251855	10|T>C|0.4	0.999999	-	three_prime_utr	WBGene00007017	mdt-17
V 4628248	17|A>G|0.588235294	1	+	three_prime_utr	WBGene00018812	sumv-2
V 2646527	13|A>G|0.153846154	0.993825	+	three_prime_utr	WBGene00020957	W02H5.2
V 4628229	14|A>G|0.142857143	0.992751	+	three_prime_utr	WBGene00018812	sumv-2
V 19927810	8|T>C|0.625	1	-	three_prime_utr	WBGene00013362	Y60A3A.14
V 4628198	6|A>G|0.666666667	1	+	three_prime_utr	WBGene00018812	sumv-2
V 4628192	5|A>G|0.4	0.999408	+	three_prime_utr	WBGene00018812	sumv-2
V 2646476	14|A>G|0.142857143	0.992751	+	three_prime_utr	WBGene00020957	W02H5.2
V 4627687	32|A>G|0.125	0.999746	+	three_prime_utr	WBGene00018812	sumv-2
V 20251761	5|T>C|0.6	0.999996	-	three_prime_utr	WBGene00007017	mdt-17
V 4628197	6|A>G|0.333333333	0.99902	+	three_prime_utr	WBGene00018812	sumv-2
V 4627703	28|A>G|0.107142857	0.997556	+	three_prime_utr	WBGene00018812	sumv-2
V 2646491	14|A>G|0.357142857	1	+	three_prime_utr	WBGene00020957	W02H5.2
V 2646490	14|A>G|0.285714286	0.999993	+	three_prime_utr	WBGene00020957	W02H5.2
V 4627751	15|A>G|0.2	0.999665	+	three_prime_utr	WBGene00018812	sumv-2
V 20251715	6|T>C|0.333333333	0.99902	-	three_prime_utr	WBGene00007017	mdt-17
V 2646554	12|A>G|0.333333333	0.999997	+	three_prime_utr	WBGene00020957	W02H5.2
V 2646535	13|A>G|0.461538462	1	+	three_prime_utr	WBGene00020957	W02H5.2
V 20251852	10|T>C|0.4	0.999999	-	three_prime_utr	WBGene00007017	mdt-17
V 4628249	17|A>G|0.294117647	1	+	three_prime_utr	WBGene00018812	sumv-2
V 4627756	15|A>G|0.533333333	1	+	three_prime_utr	WBGene00018812	sumv-2
V 2646532	13|A>G|0.769230769	1	+	three_prime_utr	WBGene00020957	W02H5.2
X 85144	5|T>C|0.8	1	-	exon	WBGene00022205	Y73B3A.3
X 85161	6|T>C|0.666666667	1	-	exon	WBGene00022205	Y73B3A.3
X 85181	7|T>C|0.714285714	1	-	exon	WBGene00022205	Y73B3A.3
X 85148	5|T>C|0.8	1	-	exon	WBGene00022205	Y73B3A.3
X 85145	5|T>C|0.8	1	-	exon	WBGene00022205	Y73B3A.3
X 85208	6|T>C|0.5	0.99999	-	exon	WBGene00022205	Y73B3A.3
X 85212	6|T>C|0.5	0.99999	-	exon	WBGene00022205	Y73B3A.3
X 85206	6|T>C|0.5	0.99999	-	exon	WBGene00022205	Y73B3A.3
X 6601368	5|T>C|0.4	0.999408	-	exon	WBGene00023275	F23G4.t1
X 6601559	6|T>C|0.5	0.99999	-	exon	WBGene00044574	F23G4.1
X 6601344	5|T>C|0.8	1	-	exon	WBGene00023275	F23G4.t1
X 6601341	5|T>C|0.8	1	-	exon	WBGene00023275	F23G4.t1
X 6601340	5|T>C|0.8	1	-	exon	WBGene00023275	F23G4.t1
III 1283133	9|T>C|0.222222222	0.99731	-	exon	WBGene00013842	fbxa-34
III 1282596	22|T>C|0.136363636	0.998838	-	exon	WBGene00013842	fbxa-34
III 1282583	23|T>C|0.130434783	0.998664	-	exon	WBGene00013842	fbxa-34
III 1282582	23|T>C|0.130434783	0.998664	-	exon	WBGene00013842	fbxa-34
III 1282565	21|T>C|0.142857143	0.998996	-	exon	WBGene00013842	fbxa-34
III 1283141	9|T>C|0.222222222	0.99731	-	exon	WBGene00013842	fbxa-34
II 3319738	14|A>G|0.142857143	0.992751	+	exon	WBGene00018194	F39E9.1
II 3319744	14|A>G|0.142857143	0.992751	+	exon	WBGene00018194	F39E9.1
II 3319750	14|A>G|0.142857143	0.992751	+	exon	WBGene00018194	F39E9.1
II 3320259	16|A>G|0.125	0.99037	+	exon	WBGene00018194	F39E9.1
II 3320274	16|A>G|0.1875	0.999584	+	exon	WBGene00018194	F39E9.1
II 5711771	7|A>G|0.571428571	1	+	exon	WBGene00015942	osta-2
V 9707265	6|A>G|0.333333333	0.99902	+	three_prime_utr	WBGene00009580	xbx-6
V 9707264	6|A>G|0.666666667	1	+	three_prime_utr	WBGene00009580	xbx-6
I 14171083	7|A>G|0.285714286	0.99854	+	five_prime_utr	WBGene00077520	C37A5.11
II 3318514	9|A>G|0.222222222	0.99731	+	exon	WBGene00018194	F39E9.1
II 3318513	9|A>G|0.222222222	0.99731	+	exon	WBGene00018194	F39E9.1
II 3318503	9|A>G|0.222222222	0.99731	+	exon	WBGene00018194	F39E9.1
II 3318502	9|A>G|0.222222222	0.99731	+	exon	WBGene00018194	F39E9.1
II 3318482	6|A>G|0.333333333	0.99902	+	exon	WBGene00018194	F39E9.1
II 3318481	6|A>G|0.333333333	0.99902	+	exon	WBGene00018194	F39E9.1
IV 6963132	7|A>G|0.428571429	0.99998	+	exon	WBGene00002178	jnk-1
II 13418915	7|A>G|0.714285714	1	+	exon	WBGene00013014	Y48E1C.1
I 3411278	12|T>C|0.5	1	-	exon	WBGene00219710	anr-45
I 3411269	12|T>C|0.333333333	0.999997	-	exon	WBGene00219710	anr-45
I 3411321	11|T>C|0.363636364	0.999998	-	exon	WBGene00219710	anr-45
I 3411305	11|T>C|0.272727273	0.999886	-	exon	WBGene00219710	anr-45
I 3411289	11|T>C|0.272727273	0.999886	-	exon	WBGene00219710	anr-45
I 3411279	12|T>C|0.75	1	-	exon	WBGene00219710	anr-45
I 3411268	12|T>C|0.75	1	-	exon	WBGene00219710	anr-45
I 3411324	11|T>C|0.636363636	1	-	exon	WBGene00219710	anr-45
I 3411225	12|T>C|0.166666667	0.99482	-	exon	WBGene00219710	anr-45
I 3411267	12|T>C|0.5	1	-	exon	WBGene00219710	anr-45
I 3411217	12|T>C|0.5	1	-	exon	WBGene00219710	anr-45
I 3411216	12|T>C|0.5	1	-	exon	WBGene00219710	anr-45
I 3411242	13|T>C|0.461538462	1	-	exon	WBGene00219710	anr-45
I 3411246	13|T>C|0.230769231	0.999794	-	exon	WBGene00219710	anr-45
I 3411263	12|T>C|0.25	0.999845	-	exon	WBGene00219710	anr-45
I 3411262	12|T>C|0.25	0.999845	-	exon	WBGene00219710	anr-45
I 3410942	8|T>C|0.875	1	-	exon	WBGene00219710	anr-45
I 3410932	9|T>C|0.333333333	0.999946	-	exon	WBGene00219710	anr-45
I 3410927	9|T>C|0.333333333	0.999946	-	exon	WBGene00219710	anr-45
I 3410926	9|T>C|0.333333333	0.999946	-	exon	WBGene00219710	anr-45
I 3410953	10|T>C|0.2	0.996564	-	exon	WBGene00219710	anr-45
I 3411139	5|T>C|0.6	0.999996	-	exon	WBGene00219710	anr-45
I 3410990	9|T>C|0.333333333	0.999946	-	exon	WBGene00219710	anr-45
I 3410988	10|T>C|0.2	0.996564	-	exon	WBGene00219710	anr-45
I 3410983	10|T>C|0.3	0.99992	-	exon	WBGene00219710	anr-45
I 3410916	9|T>C|0.333333333	0.999946	-	exon	WBGene00219710	anr-45
I 3410886	7|T>C|0.428571429	0.99998	-	exon	WBGene00219710	anr-45
I 3410871	6|T>C|0.5	0.99999	-	exon	WBGene00219710	anr-45
I 2446887	7|A>G|0.285714286	0.99854	+	exon	WBGene00017731	F23C8.1
I 11670020	5|A>G|0.6	0.999996	+	exon	WBGene00199697	F11A6.10
I 11670019	5|A>G|0.8	1	+	exon	WBGene00199697	F11A6.10
I 11670092	5|A>G|0.4	0.999408	+	exon	WBGene00199697	F11A6.10
I 11670057	6|A>G|0.5	0.99999	+	exon	WBGene00199697	F11A6.10
X 1011584	49|A>G|0.12244898	0.999991	+	exon	WBGene00023069	rncs-1
X 1011786	37|A>G|0.162162162	0.999998	+	exon	WBGene00023069	rncs-1
X 1011787	36|A>G|0.138888889	0.999975	+	exon	WBGene00023069	rncs-1
X 1011815	45|A>G|0.155555556	1	+	exon	WBGene00023069	rncs-1
X 1011811	46|A>G|0.239130435	1	+	exon	WBGene00023069	rncs-1
X 1011804	44|A>G|0.295454545	1	+	exon	WBGene00023069	rncs-1
X 1011797	39|A>G|0.179487179	1	+	exon	WBGene00023069	rncs-1
X 1011729	48|A>G|0.458333333	1	+	exon	WBGene00023069	rncs-1
X 1011724	49|A>G|0.285714286	1	+	exon	WBGene00023069	rncs-1
X 1011720	49|A>G|0.081632653	0.99863	+	exon	WBGene00023069	rncs-1
X 1011730	47|A>G|0.638297872	1	+	exon	WBGene00023069	rncs-1
X 1011749	43|A>G|0.11627907	0.999937	+	exon	WBGene00023069	rncs-1
X 1011753	40|A>G|0.6	1	+	exon	WBGene00023069	rncs-1
X 1011762	42|A>G|0.333333333	1	+	exon	WBGene00023069	rncs-1
X 1011763	41|A>G|0.87804878	1	+	exon	WBGene00023069	rncs-1
X 1011716	51|A>G|0.196078431	1	+	exon	WBGene00023069	rncs-1
X 1012055	54|A>G|0.5	1	+	exon	WBGene00023069	rncs-1
X 1012033	55|A>G|0.218181818	1	+	exon	WBGene00023069	rncs-1
X 1012046	55|A>G|0.854545455	1	+	exon	WBGene00023069	rncs-1
X 1012045	55|A>G|0.636363636	1	+	exon	WBGene00023069	rncs-1
X 1012032	56|A>G|0.071428571	0.997728	+	exon	WBGene00023069	rncs-1
X 1011988	69|A>G|0.15942029	1	+	exon	WBGene00023069	rncs-1
X 1012016	60|A>G|0.066666667	0.997062	+	exon	WBGene00023069	rncs-1
X 1011822	44|A>G|0.227272727	1	+	exon	WBGene00023069	rncs-1
X 1011821	44|A>G|0.068181818	0.99084	+	exon	WBGene00023069	rncs-1
X 1012023	57|A>G|0.087719298	0.99975	+	exon	WBGene00023069	rncs-1
X 1011604	52|A>G|0.230769231	1	+	exon	WBGene00023069	rncs-1
X 1011612	49|A>G|0.102040816	0.99988	+	exon	WBGene00023069	rncs-1
X 1011611	49|A>G|0.489795918	1	+	exon	WBGene00023069	rncs-1
X 1011610	50|A>G|0.44	1	+	exon	WBGene00023069	rncs-1
X 1011609	51|A>G|0.098039216	0.999854	+	exon	WBGene00023069	rncs-1
X 1011585	49|A>G|0.530612245	1	+	exon	WBGene00023069	rncs-1
X 1011668	58|A>G|0.120689655	0.999998	+	exon	WBGene00023069	rncs-1
X 1011687	53|A>G|0.188679245	1	+	exon	WBGene00023069	rncs-1
X 1011686	54|A>G|0.351851852	1	+	exon	WBGene00023069	rncs-1
X 1011688	53|A>G|0.396226415	1	+	exon	WBGene00023069	rncs-1
X 1011653	62|A>G|0.35483871	1	+	exon	WBGene00023069	rncs-1
X 1011615	50|A>G|0.24	1	+	exon	WBGene00023069	rncs-1
X 1011712	50|A>G|0.38	1	+	exon	WBGene00023069	rncs-1
X 1011711	50|A>G|0.16	1	+	exon	WBGene00023069	rncs-1
X 1011691	51|A>G|0.549019608	1	+	exon	WBGene00023069	rncs-1
X 1011690	52|A>G|0.076923077	0.998282	+	exon	WBGene00023069	rncs-1
X 1011650	61|A>G|0.967213115	1	+	exon	WBGene00023069	rncs-1
X 1011640	60|A>G|0.066666667	0.997062	+	exon	WBGene00023069	rncs-1
X 1011635	60|A>G|0.383333333	1	+	exon	WBGene00023069	rncs-1
X 1011631	60|A>G|0.333333333	1	+	exon	WBGene00023069	rncs-1
X 1011630	59|A>G|0.084745763	0.999705	+	exon	WBGene00023069	rncs-1
X 1011622	49|A>G|0.93877551	1	+	exon	WBGene00023069	rncs-1
X 1011621	50|A>G|0.38	1	+	exon	WBGene00023069	rncs-1
X 1012069	55|A>G|0.345454545	1	+	exon	WBGene00023069	rncs-1
X 1012184	42|A>G|0.214285714	1	+	exon	WBGene00023069	rncs-1
X 1012191	48|A>G|0.270833333	1	+	exon	WBGene00023069	rncs-1
X 1012200	59|A>G|0.220338983	1	+	exon	WBGene00023069	rncs-1
X 1012179	45|A>G|0.311111111	1	+	exon	WBGene00023069	rncs-1
X 1012176	44|A>G|0.477272727	1	+	exon	WBGene00023069	rncs-1
X 1012211	62|A>G|0.209677419	1	+	exon	WBGene00023069	rncs-1
X 1012205	62|A>G|0.209677419	1	+	exon	WBGene00023069	rncs-1
X 1012092	53|A>G|0.849056604	1	+	exon	WBGene00023069	rncs-1
X 1012085	55|A>G|0.127272727	0.999999	+	exon	WBGene00023069	rncs-1
X 1012163	47|A>G|0.723404255	1	+	exon	WBGene00023069	rncs-1
X 1012082	57|A>G|0.087719298	0.99975	+	exon	WBGene00023069	rncs-1
X 1012079	57|A>G|0.087719298	0.99975	+	exon	WBGene00023069	rncs-1
X 1012146	49|A>G|0.306122449	1	+	exon	WBGene00023069	rncs-1
X 1012154	48|A>G|0.833333333	1	+	exon	WBGene00023069	rncs-1
X 1012159	48|A>G|0.083333333	0.998734	+	exon	WBGene00023069	rncs-1
X 1012162	47|A>G|0.595744681	1	+	exon	WBGene00023069	rncs-1
III 7602023	13|A>G|0.153846154	0.993825	+	exon	WBGene00206459	Y80D4G.1
III 7602015	14|A>G|0.214285714	0.999735	+	exon	WBGene00206459	Y80D4G.1
III 7602024	13|A>G|0.153846154	0.993825	+	exon	WBGene00206459	Y80D4G.1
V 13037683	5|T>C|0.6	0.999996	-	three_prime_utr	WBGene00012337	W07G4.3
III 200662	5|A>G|0.4	0.999408	+	three_prime_utr	WBGene00185078	F40G9.17
V 13037150	36|T>C|0.5	1	-	three_prime_utr	WBGene00012337	W07G4.3
V 13037474	6|T>C|0.333333333	0.99902	-	three_prime_utr	WBGene00012337	W07G4.3
V 13037148	37|T>C|0.081081081	0.994419	-	three_prime_utr	WBGene00012337	W07G4.3
V 13037711	6|T>C|0.333333333	0.99902	-	three_prime_utr	WBGene00012337	W07G4.3
V 13037169	36|T>C|0.083333333	0.994846	-	three_prime_utr	WBGene00012337	W07G4.3
V 13037186	28|T>C|0.142857143	0.999854	-	three_prime_utr	WBGene00012337	W07G4.3
V 13037178	31|T>C|0.451612903	1	-	three_prime_utr	WBGene00012337	W07G4.3
V 13037154	37|T>C|0.216216216	1	-	three_prime_utr	WBGene00012337	W07G4.3
V 13037126	43|T>C|0.744186047	1	-	three_prime_utr	WBGene00012337	W07G4.3
V 13037223	15|T>C|0.8	1	-	three_prime_utr	WBGene00012337	W07G4.3
V 13037697	6|T>C|0.666666667	1	-	three_prime_utr	WBGene00012337	W07G4.3
V 13037179	31|T>C|0.322580645	1	-	three_prime_utr	WBGene00012337	W07G4.3
V 13037702	6|T>C|0.333333333	0.99902	-	three_prime_utr	WBGene00012337	W07G4.3
V 13037187	27|T>C|0.222222222	1	-	three_prime_utr	WBGene00012337	W07G4.3
V 13037712	6|T>C|0.833333333	1	-	three_prime_utr	WBGene00012337	W07G4.3
V 13037139	38|T>C|0.578947368	1	-	three_prime_utr	WBGene00012337	W07G4.3
V 13037125	43|T>C|0.88372093	1	-	three_prime_utr	WBGene00012337	W07G4.3
V 13037149	36|T>C|0.388888889	1	-	three_prime_utr	WBGene00012337	W07G4.3
V 13037696	6|T>C|0.666666667	1	-	three_prime_utr	WBGene00012337	W07G4.3
V 13037721	6|T>C|0.5	0.99999	-	three_prime_utr	WBGene00012337	W07G4.3
V 13037738	6|T>C|0.333333333	0.99902	-	three_prime_utr	WBGene00012337	W07G4.3
V 13037130	43|T>C|0.651162791	1	-	three_prime_utr	WBGene00012337	W07G4.3
III 200550	6|A>G|0.5	0.99999	+	three_prime_utr	WBGene00185078	F40G9.17
V 13037227	15|T>C|0.333333333	1	-	three_prime_utr	WBGene00012337	W07G4.3
V 13037346	17|T>C|0.176470588	0.999492	-	three_prime_utr	WBGene00012337	W07G4.3
III 200547	5|A>G|0.4	0.999408	+	three_prime_utr	WBGene00185078	F40G9.17
V 13037228	15|T>C|0.6	1	-	three_prime_utr	WBGene00012337	W07G4.3
V 13037345	17|T>C|0.352941176	1	-	three_prime_utr	WBGene00012337	W07G4.3
V 13037295	15|T>C|0.6	1	-	three_prime_utr	WBGene00012337	W07G4.3
V 13037344	17|T>C|0.176470588	0.999492	-	three_prime_utr	WBGene00012337	W07G4.3
V 13037307	15|T>C|0.533333333	1	-	three_prime_utr	WBGene00012337	W07G4.3
V 13037256	16|T>C|0.3125	1	-	three_prime_utr	WBGene00012337	W07G4.3
V 13037294	16|T>C|0.6875	1	-	three_prime_utr	WBGene00012337	W07G4.3
V 13037212	17|T>C|0.294117647	1	-	three_prime_utr	WBGene00012337	W07G4.3
V 13037290	16|T>C|0.3125	1	-	three_prime_utr	WBGene00012337	W07G4.3
V 13037289	16|T>C|0.75	1	-	three_prime_utr	WBGene00012337	W07G4.3
V 13037311	15|T>C|0.133333333	0.991599	-	three_prime_utr	WBGene00012337	W07G4.3
V 13037339	16|T>C|0.8125	1	-	three_prime_utr	WBGene00012337	W07G4.3
V 13037250	16|T>C|0.375	1	-	three_prime_utr	WBGene00012337	W07G4.3
V 13037320	14|T>C|0.857142857	1	-	three_prime_utr	WBGene00012337	W07G4.3
II 12668377	7|A>G|0.285714286	0.99854	+	intron	WBGene00004347	rgs-4
V 13037336	16|T>C|0.875	1	-	three_prime_utr	WBGene00012337	W07G4.3
III 200546	5|A>G|0.6	0.999996	+	three_prime_utr	WBGene00185078	F40G9.17
V 13037436	12|T>C|0.166666667	0.99482	-	three_prime_utr	WBGene00012337	W07G4.3
V 13037195	25|T>C|0.32	1	-	three_prime_utr	WBGene00012337	W07G4.3
V 13037098	59|T>C|0.101694915	0.999974	-	three_prime_utr	WBGene00012337	W07G4.3
V 13037189	25|T>C|0.72	1	-	three_prime_utr	WBGene00012337	W07G4.3
V 13037090	60|T>C|0.25	1	-	three_prime_utr	WBGene00012337	W07G4.3
V 13037426	12|T>C|0.333333333	0.999997	-	three_prime_utr	WBGene00012337	W07G4.3
V 13037427	12|T>C|0.25	0.999845	-	three_prime_utr	WBGene00012337	W07G4.3
III 200595	7|A>G|0.285714286	0.99854	+	three_prime_utr	WBGene00185078	F40G9.17
V 13037089	60|T>C|0.416666667	1	-	three_prime_utr	WBGene00012337	W07G4.3
III 200596	7|A>G|0.285714286	0.99854	+	three_prime_utr	WBGene00185078	F40G9.17
V 13037104	56|T>C|0.875	1	-	three_prime_utr	WBGene00012337	W07G4.3
V 13037188	25|T>C|0.76	1	-	three_prime_utr	WBGene00012337	W07G4.3
III 200635	6|A>G|0.833333333	1	+	three_prime_utr	WBGene00185078	F40G9.17
V 13037464	11|T>C|0.181818182	0.995734	-	three_prime_utr	WBGene00012337	W07G4.3
III 200613	6|A>G|0.333333333	0.99902	+	three_prime_utr	WBGene00185078	F40G9.17
V 13037113	52|T>C|0.730769231	1	-	three_prime_utr	WBGene00012337	W07G4.3
III 200661	5|A>G|0.4	0.999408	+	three_prime_utr	WBGene00185078	F40G9.17
V 13037437	12|T>C|0.833333333	1	-	three_prime_utr	WBGene00012337	W07G4.3
V 13037438	12|T>C|0.166666667	0.99482	-	three_prime_utr	WBGene00012337	W07G4.3
V 13037912	19|T>C|0.210526316	0.999973	-	three_prime_utr	WBGene00012337	W07G4.3
III 200614	6|A>G|0.5	0.99999	+	three_prime_utr	WBGene00185078	F40G9.17
V 13037443	12|T>C|0.583333333	1	-	three_prime_utr	WBGene00012337	W07G4.3
III 200615	6|A>G|0.5	0.99999	+	three_prime_utr	WBGene00185078	F40G9.17
V 13037444	12|T>C|0.5	1	-	three_prime_utr	WBGene00012337	W07G4.3
V 13037447	12|T>C|0.333333333	0.999997	-	three_prime_utr	WBGene00012337	W07G4.3
III 200623	6|A>G|0.666666667	1	+	three_prime_utr	WBGene00185078	F40G9.17
III 200624	6|A>G|0.5	0.99999	+	three_prime_utr	WBGene00185078	F40G9.17
III 200584	8|A>G|0.25	0.997969	+	three_prime_utr	WBGene00185078	F40G9.17
III 374959	6|A>G|0.5	0.99999	+	intron	WBGene00004045	pll-1
V 13037416	15|T>C|0.533333333	1	-	three_prime_utr	WBGene00012337	W07G4.3
III 4199369	21|A>G|0.80952381	1	+	intron	WBGene00006959	xbp-1
V 13037201	18|T>C|0.666666667	1	-	three_prime_utr	WBGene00012337	W07G4.3
III 4199539	15|A>G|0.133333333	0.991599	+	intron	WBGene00011279	asd-1
V 13037415	15|T>C|0.133333333	0.991599	-	three_prime_utr	WBGene00012337	W07G4.3
V 13037213	17|T>C|0.176470588	0.999492	-	three_prime_utr	WBGene00012337	W07G4.3
V 13037200	20|T>C|0.2	0.999966	-	three_prime_utr	WBGene00012337	W07G4.3
V 13037196	23|T>C|0.130434783	0.998664	-	three_prime_utr	WBGene00012337	W07G4.3
III 200592	7|A>G|0.714285714	1	+	three_prime_utr	WBGene00185078	F40G9.17
V 13037425	13|T>C|0.230769231	0.999794	-	three_prime_utr	WBGene00012337	W07G4.3
V 13037424	13|T>C|0.307692308	0.999995	-	three_prime_utr	WBGene00012337	W07G4.3
III 4199366	20|A>G|0.2	0.999966	+	intron	WBGene00006959	xbp-1
III 376288	8|A>G|0.375	0.999966	+	intron	WBGene00004045	pll-1
III 4199365	20|A>G|0.25	0.999999	+	intron	WBGene00006959	xbp-1
II 15216773	15|A>G|0.466666667	1	+	intron	WBGene00021597	spsb-1
II 13881540	5|A>G|0.4	0.999408	+	intron	WBGene00013095	ing-3
II 13503165	15|A>G|0.266666667	0.999991	+	three_prime_utr	WBGene00009742	F45H10.5
II 13502949	19|A>G|0.210526316	0.999973	+	three_prime_utr	WBGene00009742	F45H10.5
II 13503355	31|A>G|0.096774194	0.996682	+	three_prime_utr	WBGene00009742	F45H10.5
II 13816478	6|A>G|0.333333333	0.99902	+	intron	WBGene00013934	ZK131.11
II 13881528	5|A>G|0.6	0.999996	+	intron	WBGene00013095	ing-3
II 13881527	5|A>G|0.6	0.999996	+	intron	WBGene00013095	ing-3
III 1933727	8|A>G|0.375	0.999966	+	intron	WBGene00004128	pqn-41
III 1932812	9|A>G|0.555555556	1	+	intron	WBGene00004128	pqn-41
II 15105931	5|A>G|0.4	0.999408	+	intron	WBGene00013167	Y53F4B.21
II 15105962	5|A>G|0.4	0.999408	+	intron	WBGene00013167	Y53F4B.21
II 15105965	5|A>G|0.6	0.999996	+	intron	WBGene00013167	Y53F4B.21
II 15105932	5|A>G|0.6	0.999996	+	intron	WBGene00013167	Y53F4B.21
III 1932871	9|A>G|0.222222222	0.99731	+	intron	WBGene00004128	pqn-41
III 1932867	9|A>G|0.666666667	1	+	intron	WBGene00004128	pqn-41
II 15105915	5|A>G|0.4	0.999408	+	intron	WBGene00013167	Y53F4B.21
II 13407075	8|A>G|0.375	0.999966	+	intron	WBGene00001162	efl-2
II 13407074	8|A>G|0.75	1	+	intron	WBGene00001162	efl-2
III 1938229	34|A>G|0.117647059	0.999675	+	intron	WBGene00004128	pqn-41
III 1938226	34|A>G|0.205882353	1	+	intron	WBGene00004128	pqn-41
III 1938225	34|A>G|0.088235294	0.99564	+	intron	WBGene00004128	pqn-41
II 13407084	8|A>G|0.375	0.999966	+	intron	WBGene00001162	efl-2
II 13407096	9|A>G|0.333333333	0.999946	+	intron	WBGene00001162	efl-2
II 13407120	7|A>G|0.857142857	1	+	intron	WBGene00001162	efl-2
II 13407109	7|A>G|0.285714286	0.99854	+	intron	WBGene00001162	efl-2
II 13407103	8|A>G|0.875	1	+	intron	WBGene00001162	efl-2
II 13407102	8|A>G|0.875	1	+	intron	WBGene00001162	efl-2
III 1932571	6|A>G|0.5	0.99999	+	intron	WBGene00004128	pqn-41
III 3087623	7|A>G|0.285714286	0.99854	+	intron	WBGene00004787	sft-1
III 3088071	6|A>G|0.333333333	0.99902	+	intron	WBGene00004787	sft-1
III 3088089	5|A>G|0.4	0.999408	+	intron	WBGene00004787	sft-1
II 15105972	5|A>G|0.8	1	+	intron	WBGene00013167	Y53F4B.21
II 12810235	8|A>G|0.25	0.997969	+	intron	WBGene00012909	spds-1
III 1568134	10|A>G|0.2	0.996564	+	intron	WBGene00022053	Y67D2.3
II 12810039	10|A>G|0.6	1	+	intron	WBGene00012909	spds-1
II 12720854	7|A>G|0.285714286	0.99854	+	intron	WBGene00012894	tbc-17
II 12720853	7|A>G|0.285714286	0.99854	+	intron	WBGene00012894	tbc-17
II 15222710	22|A>G|0.136363636	0.998838	+	intron	WBGene00021597	spsb-1
II 15222720	22|A>G|0.181818182	0.999948	+	intron	WBGene00021597	spsb-1
III 1574781	10|A>G|0.3	0.99992	+	intron	WBGene00022051	rep-1
III 1574773	10|A>G|0.3	0.99992	+	intron	WBGene00022051	rep-1
III 1574772	10|A>G|0.8	1	+	intron	WBGene00022051	rep-1
III 1574738	7|A>G|0.285714286	0.99854	+	intron	WBGene00022051	rep-1
III 1574570	7|A>G|0.428571429	0.99998	+	intron	WBGene00022051	rep-1
III 1574560	8|A>G|0.5	1	+	intron	WBGene00022051	rep-1
III 1574556	8|A>G|0.75	1	+	intron	WBGene00022051	rep-1
III 1574551	8|A>G|0.625	1	+	intron	WBGene00022051	rep-1
II 15222332	13|A>G|0.153846154	0.993825	+	intron	WBGene00021597	spsb-1
II 15222322	14|A>G|0.142857143	0.992751	+	intron	WBGene00021597	spsb-1
II 15222323	14|A>G|0.142857143	0.992751	+	intron	WBGene00021597	spsb-1
III 1574505	15|A>G|0.4	1	+	intron	WBGene00022051	rep-1
III 1574500	16|A>G|0.1875	0.999584	+	intron	WBGene00022051	rep-1
III 1568237	6|A>G|0.333333333	0.99902	+	intron	WBGene00022053	Y67D2.3
III 1568231	6|A>G|0.833333333	1	+	intron	WBGene00022053	Y67D2.3
III 1568204	6|A>G|0.666666667	1	+	intron	WBGene00022052	Y67D2.2
III 1568181	5|A>G|0.4	0.999408	+	intron	WBGene00022053	Y67D2.3
III 1568175	5|A>G|0.8	1	+	intron	WBGene00022053	Y67D2.3
III 1568256	7|A>G|0.714285714	1	+	intron	WBGene00022053	Y67D2.3
II 15222361	6|A>G|0.666666667	1	+	intron	WBGene00021597	spsb-1
III 1574474	14|A>G|0.5	1	+	intron	WBGene00022053	Y67D2.3
II 15222376	5|A>G|0.6	0.999996	+	intron	WBGene00021597	spsb-1
III 1568257	7|A>G|0.714285714	1	+	intron	WBGene00022053	Y67D2.3
III 1568298	5|A>G|0.4	0.999408	+	intron	WBGene00022053	Y67D2.3
III 1568285	5|A>G|0.6	0.999996	+	intron	WBGene00022053	Y67D2.3
III 1568277	6|A>G|0.333333333	0.99902	+	intron	WBGene00022053	Y67D2.3
III 1568276	6|A>G|0.333333333	0.99902	+	intron	WBGene00022053	Y67D2.3
III 1568266	7|A>G|0.571428571	1	+	intron	WBGene00022053	Y67D2.3
II 12719238	7|A>G|0.285714286	0.99854	+	intron	WBGene00012894	tbc-17
III 1139654	6|A>G|0.833333333	1	+	intron	WBGene00022104	Y71D11A.3
III 1139653	6|A>G|0.666666667	1	+	intron	WBGene00022104	Y71D11A.3
V 8924061	8|T>C|0.25	0.997969	-	three_prime_utr	WBGene00019204	H14N18.4
V 8924063	8|T>C|0.5	1	-	three_prime_utr	WBGene00019204	H14N18.4
V 8924062	8|T>C|0.375	0.999966	-	three_prime_utr	WBGene00019204	H14N18.4
V 8924060	8|T>C|0.625	1	-	three_prime_utr	WBGene00019204	H14N18.4
V 8924059	8|T>C|0.375	0.999966	-	three_prime_utr	WBGene00019204	H14N18.4
V 8924041	10|T>C|0.5	1	-	three_prime_utr	WBGene00019204	H14N18.4
II 12713528	12|A>G|0.166666667	0.99482	+	intron	WBGene00012894	tbc-17
II 12713527	11|A>G|0.818181818	1	+	intron	WBGene00012894	tbc-17
II 12713512	9|A>G|0.333333333	0.999946	+	intron	WBGene00012894	tbc-17
II 12713511	9|A>G|0.333333333	0.999946	+	intron	WBGene00012894	tbc-17
II 15227262	23|A>G|0.130434783	0.998664	+	intron	WBGene00021597	spsb-1
II 12713497	7|A>G|0.285714286	0.99854	+	intron	WBGene00012894	tbc-17
II 13208675	7|A>G|0.428571429	0.99998	+	intron	WBGene00000274	btf-1
II 15216728	21|A>G|0.285714286	1	+	intron	WBGene00021597	spsb-1
II 15216729	21|A>G|0.19047619	0.999957	+	intron	WBGene00021597	spsb-1
II 15216732	21|A>G|0.238095238	0.999999	+	intron	WBGene00021597	spsb-1
II 15216741	20|A>G|0.95	1	+	intron	WBGene00021597	spsb-1
II 13208663	7|A>G|0.285714286	0.99854	+	intron	WBGene00000274	btf-1
II 15216742	20|A>G|0.3	1	+	intron	WBGene00021597	spsb-1
II 13208651	6|A>G|0.5	0.99999	+	intron	WBGene00000274	btf-1
II 15216752	20|A>G|0.85	1	+	intron	WBGene00021597	spsb-1
II 15216721	23|A>G|0.173913043	0.999937	+	intron	WBGene00021597	spsb-1
II 15121601	7|A>G|0.571428571	1	+	intron	WBGene00013168	arp-1
II 13208685	7|A>G|0.285714286	0.99854	+	intron	WBGene00000274	btf-1
II 15216714	27|A>G|0.111111111	0.997811	+	intron	WBGene00021597	spsb-1
II 13198748	8|A>G|0.25	0.997969	+	intron	WBGene00002264	lec-1
II 15216753	20|A>G|0.85	1	+	intron	WBGene00021597	spsb-1
II 15216774	15|A>G|0.2	0.999665	+	intron	WBGene00021597	spsb-1
II 15216801	9|A>G|0.222222222	0.99731	+	intron	WBGene00021597	spsb-1
II 15216889	5|A>G|0.8	1	+	intron	WBGene00021597	spsb-1
II 15216898	5|A>G|0.4	0.999408	+	intron	WBGene00021597	spsb-1
II 15216899	5|A>G|0.8	1	+	intron	WBGene00021597	spsb-1
II 13198730	8|A>G|0.5	1	+	intron	WBGene00002264	lec-1
II 13198715	9|A>G|0.222222222	0.99731	+	intron	WBGene00002264	lec-1
II 15216758	20|A>G|0.5	1	+	intron	WBGene00021597	spsb-1
II 15216759	20|A>G|0.55	1	+	intron	WBGene00021597	spsb-1
II 15216763	20|A>G|0.25	0.999999	+	intron	WBGene00021597	spsb-1
II 15121588	5|A>G|0.4	0.999408	+	intron	WBGene00013168	arp-1
II 15106233	7|A>G|0.571428571	1	+	intron	WBGene00013167	Y53F4B.21
II 15106234	7|A>G|0.428571429	0.99998	+	intron	WBGene00013167	Y53F4B.21
II 15106236	7|A>G|0.857142857	1	+	intron	WBGene00013167	Y53F4B.21
II 15106241	7|A>G|0.285714286	0.99854	+	intron	WBGene00013167	Y53F4B.21
II 15106255	7|A>G|0.571428571	1	+	intron	WBGene00013167	Y53F4B.21
II 15106271	8|A>G|0.25	0.997969	+	intron	WBGene00013167	Y53F4B.21
III 1932566	6|A>G|0.5	0.99999	+	intron	WBGene00004128	pqn-41
II 15106212	7|A>G|0.285714286	0.99854	+	intron	WBGene00013167	Y53F4B.21
II 15106211	7|A>G|0.714285714	1	+	intron	WBGene00013167	Y53F4B.21
II 15105977	5|A>G|0.4	0.999408	+	intron	WBGene00013167	Y53F4B.21
II 15106184	7|A>G|0.428571429	0.99998	+	intron	WBGene00013167	Y53F4B.21
II 15106210	7|A>G|0.857142857	1	+	intron	WBGene00013167	Y53F4B.21
II 15106190	7|A>G|0.571428571	1	+	intron	WBGene00013167	Y53F4B.21
II 15106191	7|A>G|0.285714286	0.99854	+	intron	WBGene00013167	Y53F4B.21
III 1932563	6|A>G|0.833333333	1	+	intron	WBGene00004128	pqn-41
II 15121488	5|A>G|0.4	0.999408	+	intron	WBGene00013168	arp-1
III 1932508	7|A>G|0.428571429	0.99998	+	intron	WBGene00004128	pqn-41
II 15121542	5|A>G|0.4	0.999408	+	intron	WBGene00013168	arp-1
II 15121543	5|A>G|0.4	0.999408	+	intron	WBGene00013168	arp-1
II 15121552	5|A>G|0.4	0.999408	+	intron	WBGene00013168	arp-1
II 15121563	5|A>G|0.6	0.999996	+	intron	WBGene00013168	arp-1
II 15121571	6|A>G|0.833333333	1	+	intron	WBGene00013168	arp-1
III 1932554	7|A>G|0.714285714	1	+	intron	WBGene00004128	pqn-41
III 1932543	8|A>G|0.875	1	+	intron	WBGene00004128	pqn-41
II 15121460	5|A>G|0.6	0.999996	+	intron	WBGene00013168	arp-1
II 15222212	21|A>G|0.19047619	0.999957	+	intron	WBGene00021597	spsb-1
II 15222213	21|A>G|0.238095238	0.999999	+	intron	WBGene00021597	spsb-1
II 15222217	21|A>G|0.476190476	1	+	intron	WBGene00021597	spsb-1
II 15222229	22|A>G|0.272727273	1	+	intron	WBGene00021597	spsb-1
II 15222230	22|A>G|0.590909091	1	+	intron	WBGene00021597	spsb-1
II 15222202	23|A>G|0.826086957	1	+	intron	WBGene00021597	spsb-1
II 15222203	24|A>G|0.125	0.998475	+	intron	WBGene00021597	spsb-1
II 15216935	5|A>G|0.8	1	+	intron	WBGene00021597	spsb-1
II 15217482	6|A>G|0.666666667	1	+	intron	WBGene00021597	spsb-1
II 15217483	6|A>G|0.5	0.99999	+	intron	WBGene00021597	spsb-1
II 15217490	6|A>G|0.833333333	1	+	intron	WBGene00021597	spsb-1
II 15217491	6|A>G|0.333333333	0.99902	+	intron	WBGene00021597	spsb-1
II 15217510	8|A>G|0.25	0.997969	+	intron	WBGene00021597	spsb-1
II 15217511	8|A>G|0.25	0.997969	+	intron	WBGene00021597	spsb-1
II 15217583	6|A>G|0.5	0.99999	+	intron	WBGene00021597	spsb-1
II 15217481	6|A>G|0.5	0.99999	+	intron	WBGene00021597	spsb-1
II 15216940	5|A>G|0.8	1	+	intron	WBGene00021597	spsb-1
II 15216942	5|A>G|0.8	1	+	intron	WBGene00021597	spsb-1
II 15216943	5|A>G|0.4	0.999408	+	intron	WBGene00021597	spsb-1
II 15217478	6|A>G|0.333333333	0.99902	+	intron	WBGene00021597	spsb-1
II 15217299	5|A>G|0.8	1	+	intron	WBGene00021597	spsb-1
II 15217476	6|A>G|0.833333333	1	+	intron	WBGene00021597	spsb-1
II 15217477	6|A>G|0.666666667	1	+	intron	WBGene00021597	spsb-1
III 1879745	5|A>G|0.6	0.999996	+	intron	WBGene00004886	smi-1
II 15217613	5|A>G|0.4	0.999408	+	intron	WBGene00021597	spsb-1
II 15217694	12|A>G|0.583333333	1	+	intron	WBGene00021597	spsb-1
II 15217641	5|A>G|0.6	0.999996	+	intron	WBGene00021597	spsb-1
II 15217650	5|A>G|0.4	0.999408	+	intron	WBGene00021597	spsb-1
II 15217681	10|A>G|0.9	1	+	intron	WBGene00021597	spsb-1
II 15217682	10|A>G|0.2	0.996564	+	intron	WBGene00021597	spsb-1
V 13037913	19|T>C|0.157894737	0.999271	-	three_prime_utr	WBGene00012337	W07G4.3
I 6570885	10|A>G|0.3	0.99992	+	intron	WBGene00019001	ipgm-1
I 7527796	8|A>G|0.5	1	+	intron	WBGene00003552	nas-36
I 7345233	21|A>G|0.142857143	0.998996	+	intron	WBGene00009917	glb-18
I 7345331	17|A>G|0.176470588	0.999492	+	intron	WBGene00009917	glb-18
I 7428780	5|A>G|0.8	1	+	intron	WBGene00006752	unc-13
I 7431545	5|A>G|0.8	1	+	intron	WBGene00006752	unc-13
I 7432744	5|A>G|0.4	0.999408	+	intron	WBGene00006752	unc-13
I 7432768	5|A>G|0.4	0.999408	+	intron	WBGene00006752	unc-13
I 7432769	5|A>G|0.8	1	+	intron	WBGene00006752	unc-13
X 8184254	5|T>C|0.4	0.999408	-	intron	WBGene00015925	C17H11.5
I 4824361	5|A>G|0.4	0.999408	+	intron	WBGene00019012	F57C9.6
I 4911255	11|A>G|0.181818182	0.995734	+	intron	WBGene00017671	pgal-1
I 4824229	7|A>G|0.285714286	0.99854	+	intron	WBGene00019012	F57C9.6
I 9439609	8|A>G|0.5	1	+	intron	WBGene00007647	C17E4.10
I 9467615	18|A>G|0.277777778	0.999999	+	intron	WBGene00006681	twk-29
I 9467641	14|A>G|0.142857143	0.992751	+	intron	WBGene00006681	twk-29
I 9467642	13|A>G|0.384615385	1	+	intron	WBGene00006681	twk-29
I 9467646	13|A>G|0.307692308	0.999995	+	intron	WBGene00006681	twk-29
I 9467656	9|A>G|0.333333333	0.999946	+	intron	WBGene00006681	twk-29
I 2076640	20|A>G|0.8	1	+	three_prime_utr	WBGene00021351	Y37E3.10
I 1751952	11|A>G|0.363636364	0.999998	+	intron	WBGene00022150	Y71G12B.10
I 1769341	12|A>G|0.5	1	+	intron	WBGene00022148	Y71G12B.8
I 1752149	7|A>G|0.428571429	0.99998	+	intron	WBGene00022150	Y71G12B.10
I 1752160	6|A>G|0.666666667	1	+	intron	WBGene00022150	Y71G12B.10
I 1752464	5|A>G|0.4	0.999408	+	intron	WBGene00022150	Y71G12B.10
I 1752471	6|A>G|0.333333333	0.99902	+	intron	WBGene00022150	Y71G12B.10
I 1752473	6|A>G|0.333333333	0.99902	+	intron	WBGene00022150	Y71G12B.10
I 1752474	6|A>G|0.5	0.99999	+	intron	WBGene00022150	Y71G12B.10
I 1769330	12|A>G|0.25	0.999845	+	intron	WBGene00022148	Y71G12B.8
I 1769331	12|A>G|0.25	0.999845	+	intron	WBGene00022148	Y71G12B.8
I 1769346	12|A>G|0.25	0.999845	+	intron	WBGene00022148	Y71G12B.8
I 1752138	8|A>G|0.375	0.999966	+	intron	WBGene00022150	Y71G12B.10
I 1769365	11|A>G|0.363636364	0.999998	+	intron	WBGene00022148	Y71G12B.8
I 1769377	7|A>G|0.285714286	0.99854	+	intron	WBGene00022148	Y71G12B.8
I 1769378	7|A>G|0.285714286	0.99854	+	intron	WBGene00022148	Y71G12B.8
I 1769386	6|A>G|0.833333333	1	+	intron	WBGene00022148	Y71G12B.8
I 1769387	6|A>G|0.333333333	0.99902	+	intron	WBGene00022148	Y71G12B.8
I 1769388	6|A>G|0.333333333	0.99902	+	intron	WBGene00022148	Y71G12B.8
I 1769389	6|A>G|0.5	0.99999	+	intron	WBGene00022148	Y71G12B.8
I 1769397	5|A>G|0.4	0.999408	+	intron	WBGene00022148	Y71G12B.8
I 1752143	7|A>G|0.571428571	1	+	intron	WBGene00022150	Y71G12B.10
I 1752133	8|A>G|0.5	1	+	intron	WBGene00022150	Y71G12B.10
I 1751957	12|A>G|0.333333333	0.999997	+	intron	WBGene00022150	Y71G12B.10
I 1752005	13|A>G|0.846153846	1	+	intron	WBGene00022150	Y71G12B.10
I 1751959	12|A>G|0.5	1	+	intron	WBGene00022150	Y71G12B.10
I 1751970	12|A>G|0.25	0.999845	+	intron	WBGene00022150	Y71G12B.10
I 1751971	12|A>G|0.333333333	0.999997	+	intron	WBGene00022150	Y71G12B.10
I 1751980	12|A>G|0.583333333	1	+	intron	WBGene00022150	Y71G12B.10
I 1751981	12|A>G|0.833333333	1	+	intron	WBGene00022150	Y71G12B.10
I 1751982	12|A>G|0.75	1	+	intron	WBGene00022150	Y71G12B.10
I 1751998	13|A>G|0.307692308	0.999995	+	intron	WBGene00022150	Y71G12B.10
I 1751999	13|A>G|0.153846154	0.993825	+	intron	WBGene00022150	Y71G12B.10
I 1752010	13|A>G|0.846153846	1	+	intron	WBGene00022150	Y71G12B.10
I 1752132	8|A>G|0.75	1	+	intron	WBGene00022150	Y71G12B.10
I 1752011	13|A>G|0.230769231	0.999794	+	intron	WBGene00022150	Y71G12B.10
I 1752021	11|A>G|0.454545455	1	+	intron	WBGene00022150	Y71G12B.10
I 1752087	8|A>G|0.375	0.999966	+	intron	WBGene00022150	Y71G12B.10
I 1752108	8|A>G|0.25	0.997969	+	intron	WBGene00022150	Y71G12B.10
I 1752125	8|A>G|0.875	1	+	intron	WBGene00022150	Y71G12B.10
I 1752131	8|A>G|0.25	0.997969	+	intron	WBGene00022150	Y71G12B.10
X 15989255	5|T>C|0.4	0.999408	-	intron	WBGene00007486	C09G1.4
X 15989210	6|T>C|0.333333333	0.99902	-	intron	WBGene00007486	C09G1.4
X 15989200	6|T>C|0.333333333	0.99902	-	intron	WBGene00007486	C09G1.4
I 1553993	10|A>G|0.2	0.996564	+	intron	WBGene00022358	Y92H12A.2
I 1577180	5|A>G|0.4	0.999408	+	intron	WBGene00005077	src-1
I 1577181	5|A>G|0.8	1	+	intron	WBGene00005077	src-1
I 1577188	5|A>G|0.8	1	+	intron	WBGene00005077	src-1
I 1577223	5|A>G|0.6	0.999996	+	intron	WBGene00005077	src-1
I 1577224	5|A>G|0.6	0.999996	+	intron	WBGene00005077	src-1
X 15629394	7|T>C|0.571428571	1	-	intron	WBGene00044143	K09E9.4
I 1554009	7|A>G|0.571428571	1	+	intron	WBGene00022358	Y92H12A.2
I 1554010	7|A>G|0.285714286	0.99854	+	intron	WBGene00022358	Y92H12A.2
I 1554011	7|A>G|0.571428571	1	+	intron	WBGene00022358	Y92H12A.2
I 1554025	6|A>G|0.333333333	0.99902	+	intron	WBGene00022358	Y92H12A.2
I 1554044	6|A>G|0.333333333	0.99902	+	intron	WBGene00022358	Y92H12A.2
I 1554189	5|A>G|0.4	0.999408	+	intron	WBGene00022358	Y92H12A.2
I 1554217	6|A>G|0.333333333	0.99902	+	intron	WBGene00022358	Y92H12A.2
I 1554221	6|A>G|0.833333333	1	+	intron	WBGene00022358	Y92H12A.2
I 1554230	6|A>G|0.5	0.99999	+	intron	WBGene00022358	Y92H12A.2
I 1769410	5|A>G|0.4	0.999408	+	intron	WBGene00022148	Y71G12B.8
I 2032444	15|A>G|0.133333333	0.991599	+	intron	WBGene00021237	crtc-1
I 1936900	11|A>G|0.181818182	0.995734	+	intron	WBGene00021765	Y51F10.4
I 2076609	18|A>G|0.222222222	0.999979	+	three_prime_utr	WBGene00021351	Y37E3.10
I 2076456	20|A>G|0.35	1	+	three_prime_utr	WBGene00021351	Y37E3.10
I 2076457	20|A>G|0.15	0.999141	+	three_prime_utr	WBGene00021351	Y37E3.10
I 2076467	18|A>G|0.333333333	1	+	three_prime_utr	WBGene00021351	Y37E3.10
I 2076468	18|A>G|0.222222222	0.999979	+	three_prime_utr	WBGene00021351	Y37E3.10
I 2076471	16|A>G|0.1875	0.999584	+	three_prime_utr	WBGene00021351	Y37E3.10
I 2076481	17|A>G|0.705882353	1	+	three_prime_utr	WBGene00021351	Y37E3.10
I 2076482	17|A>G|0.176470588	0.999492	+	three_prime_utr	WBGene00021351	Y37E3.10
I 2076610	18|A>G|0.222222222	0.999979	+	three_prime_utr	WBGene00021351	Y37E3.10
I 2076629	19|A>G|0.315789474	1	+	three_prime_utr	WBGene00021351	Y37E3.10
I 2076630	19|A>G|0.368421053	1	+	three_prime_utr	WBGene00021351	Y37E3.10
I 2076632	19|A>G|0.315789474	1	+	three_prime_utr	WBGene00021351	Y37E3.10
I 2076412	36|A>G|0.138888889	0.999975	+	three_prime_utr	WBGene00021351	Y37E3.10
I 2076411	36|A>G|0.25	1	+	three_prime_utr	WBGene00021351	Y37E3.10
I 2076405	38|A>G|0.263157895	1	+	three_prime_utr	WBGene00021351	Y37E3.10
I 2076410	37|A>G|0.378378378	1	+	three_prime_utr	WBGene00021351	Y37E3.10
I 1810670	9|A>G|0.222222222	0.99731	+	intron	WBGene00022144	pghm-1
I 1810772	11|A>G|0.818181818	1	+	intron	WBGene00022144	pghm-1
I 1810773	11|A>G|0.909090909	1	+	intron	WBGene00022144	pghm-1
I 1810794	10|A>G|0.9	1	+	intron	WBGene00022144	pghm-1
I 1810883	13|A>G|0.538461538	1	+	intron	WBGene00022144	pghm-1
I 1810893	14|A>G|0.285714286	0.999993	+	intron	WBGene00022144	pghm-1
I 1810919	12|A>G|0.25	0.999845	+	intron	WBGene00022144	pghm-1
I 1810949	17|A>G|0.294117647	1	+	intron	WBGene00022144	pghm-1
I 1774773	7|A>G|0.428571429	0.99998	+	intron	WBGene00022148	Y71G12B.8
I 1776969	5|A>G|0.4	0.999408	+	intron	WBGene00022148	Y71G12B.8
I 1776981	5|A>G|0.6	0.999996	+	intron	WBGene00022148	Y71G12B.8
I 1776983	5|A>G|0.6	0.999996	+	intron	WBGene00022148	Y71G12B.8
I 1776984	5|A>G|0.6	0.999996	+	intron	WBGene00022148	Y71G12B.8
X 15270338	6|T>C|0.333333333	0.99902	-	intron	WBGene00002203	kin-20
I 1810648	8|A>G|0.875	1	+	intron	WBGene00022144	pghm-1
I 1777033	6|A>G|0.333333333	0.99902	+	intron	WBGene00022148	Y71G12B.8
I 1777038	6|A>G|0.333333333	0.99902	+	intron	WBGene00022148	Y71G12B.8
I 1777057	6|A>G|0.5	0.99999	+	intron	WBGene00022148	Y71G12B.8
I 1810321	11|A>G|0.272727273	0.999886	+	intron	WBGene00022144	pghm-1
I 1810322	11|A>G|0.454545455	1	+	intron	WBGene00022144	pghm-1
I 1810610	6|A>G|0.666666667	1	+	intron	WBGene00022144	pghm-1
I 1810647	8|A>G|0.25	0.997969	+	intron	WBGene00022144	pghm-1
I 1882366	5|A>G|0.6	0.999996	+	intron	WBGene00022139	tub-2
I 1882416	6|A>G|0.333333333	0.99902	+	intron	WBGene00022139	tub-2
I 1000781	5|A>G|0.4	0.999408	+	intron	WBGene00016932	C54G6.3
I 999814	5|A>G|0.6	0.999996	+	intron	WBGene00016932	C54G6.3
I 999819	5|A>G|0.4	0.999408	+	intron	WBGene00016932	C54G6.3
I 999840	5|A>G|0.6	0.999996	+	intron	WBGene00016932	C54G6.3
X 16903879	5|T>C|0.4	0.999408	-	intron	WBGene00018204	F39F10.4
I 454106	5|A>G|0.8	1	+	intron	WBGene00006593	tol-1
I 454111	5|A>G|0.4	0.999408	+	intron	WBGene00006593	tol-1
I 454113	5|A>G|0.6	0.999996	+	intron	WBGene00006593	tol-1
I 454118	5|A>G|0.6	0.999996	+	intron	WBGene00006593	tol-1
I 454466	8|A>G|0.25	0.997969	+	intron	WBGene00006593	tol-1
I 454475	8|A>G|0.25	0.997969	+	intron	WBGene00006593	tol-1
I 1359377	28|A>G|0.107142857	0.997556	+	three_prime_utr	WBGene00022363	Y92H12BL.1
I 1359379	28|A>G|0.142857143	0.999854	+	three_prime_utr	WBGene00022363	Y92H12BL.1
I 1359386	29|A>G|0.206896552	1	+	three_prime_utr	WBGene00022363	Y92H12BL.1
I 1359393	26|A>G|0.269230769	1	+	three_prime_utr	WBGene00022363	Y92H12BL.1
I 1359400	26|A>G|0.576923077	1	+	three_prime_utr	WBGene00022363	Y92H12BL.1
I 1359401	26|A>G|0.230769231	1	+	three_prime_utr	WBGene00022363	Y92H12BL.1
I 1359410	21|A>G|0.714285714	1	+	three_prime_utr	WBGene00022363	Y92H12BL.1
I 1359411	21|A>G|0.142857143	0.998996	+	three_prime_utr	WBGene00022363	Y92H12BL.1
I 1359371	27|A>G|0.222222222	1	+	three_prime_utr	WBGene00022363	Y92H12BL.1
I 1359372	26|A>G|0.846153846	1	+	three_prime_utr	WBGene00022363	Y92H12BL.1
X 16750143	9|T>C|0.555555556	1	-	intron	WBGene00015675	C10E2.5
X 16750139	9|T>C|0.333333333	0.999946	-	intron	WBGene00015675	C10E2.5
X 16750106	7|T>C|0.285714286	0.99854	-	intron	WBGene00015675	C10E2.5
X 16750160	7|T>C|0.857142857	1	-	intron	WBGene00015675	C10E2.5
X 16750165	7|T>C|0.571428571	1	-	intron	WBGene00015675	C10E2.5
I 1358890	25|A>G|0.16	0.999909	+	three_prime_utr	WBGene00022363	Y92H12BL.1
X 16750166	7|T>C|0.571428571	1	-	intron	WBGene00015675	C10E2.5
X 16750387	5|T>C|0.4	0.999408	-	intron	WBGene00015675	C10E2.5
X 16750222	8|T>C|0.25	0.997969	-	intron	WBGene00015675	C10E2.5
X 16750204	7|T>C|0.857142857	1	-	intron	WBGene00015675	C10E2.5
X 16750188	7|T>C|0.285714286	0.99854	-	intron	WBGene00015675	C10E2.5
X 16750187	7|T>C|0.428571429	0.99998	-	intron	WBGene00015675	C10E2.5
I 1358889	25|A>G|0.76	1	+	three_prime_utr	WBGene00022363	Y92H12BL.1
I 1358903	26|A>G|0.615384615	1	+	three_prime_utr	WBGene00022363	Y92H12BL.1
I 1359367	27|A>G|0.259259259	1	+	three_prime_utr	WBGene00022363	Y92H12BL.1
I 1359212	13|A>G|0.846153846	1	+	three_prime_utr	WBGene00022363	Y92H12BL.1
I 1359217	14|A>G|0.214285714	0.999735	+	three_prime_utr	WBGene00022363	Y92H12BL.1
I 1359218	14|A>G|0.142857143	0.992751	+	three_prime_utr	WBGene00022363	Y92H12BL.1
I 1359220	14|A>G|0.142857143	0.992751	+	three_prime_utr	WBGene00022363	Y92H12BL.1
I 1359227	15|A>G|0.733333333	1	+	three_prime_utr	WBGene00022363	Y92H12BL.1
I 1359234	16|A>G|0.625	1	+	three_prime_utr	WBGene00022363	Y92H12BL.1
I 1359248	21|A>G|0.19047619	0.999957	+	three_prime_utr	WBGene00022363	Y92H12BL.1
I 1359249	21|A>G|0.285714286	1	+	three_prime_utr	WBGene00022363	Y92H12BL.1
I 1359257	25|A>G|0.16	0.999909	+	three_prime_utr	WBGene00022363	Y92H12BL.1
I 1359258	26|A>G|0.615384615	1	+	three_prime_utr	WBGene00022363	Y92H12BL.1
I 1359259	26|A>G|0.269230769	1	+	three_prime_utr	WBGene00022363	Y92H12BL.1
I 1359263	26|A>G|0.192307692	0.999996	+	three_prime_utr	WBGene00022363	Y92H12BL.1
I 1359265	26|A>G|0.230769231	1	+	three_prime_utr	WBGene00022363	Y92H12BL.1
I 1359350	32|A>G|0.09375	0.996354	+	three_prime_utr	WBGene00022363	Y92H12BL.1
I 1359351	33|A>G|0.151515152	0.999984	+	three_prime_utr	WBGene00022363	Y92H12BL.1
I 1359360	28|A>G|0.392857143	1	+	three_prime_utr	WBGene00022363	Y92H12BL.1
I 1359361	28|A>G|0.178571429	0.999993	+	three_prime_utr	WBGene00022363	Y92H12BL.1
I 1359211	13|A>G|0.923076923	1	+	three_prime_utr	WBGene00022363	Y92H12BL.1
I 1358915	25|A>G|0.16	0.999909	+	three_prime_utr	WBGene00022363	Y92H12BL.1
I 1358957	14|A>G|0.285714286	0.999993	+	three_prime_utr	WBGene00022363	Y92H12BL.1
I 1358920	25|A>G|0.2	0.999996	+	three_prime_utr	WBGene00022363	Y92H12BL.1
I 1358922	24|A>G|0.291666667	1	+	three_prime_utr	WBGene00022363	Y92H12BL.1
I 1358928	21|A>G|0.285714286	1	+	three_prime_utr	WBGene00022363	Y92H12BL.1
I 1358933	19|A>G|0.368421053	1	+	three_prime_utr	WBGene00022363	Y92H12BL.1
I 1358938	18|A>G|0.222222222	0.999979	+	three_prime_utr	WBGene00022363	Y92H12BL.1
I 1358945	15|A>G|0.133333333	0.991599	+	three_prime_utr	WBGene00022363	Y92H12BL.1
I 1359192	10|A>G|0.5	1	+	three_prime_utr	WBGene00022363	Y92H12BL.1
I 1359162	7|A>G|0.285714286	0.99854	+	three_prime_utr	WBGene00022363	Y92H12BL.1
I 1359167	7|A>G|0.428571429	0.99998	+	three_prime_utr	WBGene00022363	Y92H12BL.1
I 1359177	8|A>G|0.375	0.999966	+	three_prime_utr	WBGene00022363	Y92H12BL.1
I 1359178	8|A>G|0.875	1	+	three_prime_utr	WBGene00022363	Y92H12BL.1
I 1359188	10|A>G|0.2	0.996564	+	three_prime_utr	WBGene00022363	Y92H12BL.1
I 2076639	20|A>G|0.5	1	+	three_prime_utr	WBGene00021351	Y37E3.10
I 2076643	20|A>G|0.45	1	+	three_prime_utr	WBGene00021351	Y37E3.10
I 3507562	5|A>G|0.8	1	+	intron	WBGene00021637	Y47G6A.7
I 3507567	6|A>G|0.333333333	0.99902	+	intron	WBGene00021637	Y47G6A.7
I 3507568	6|A>G|0.333333333	0.99902	+	intron	WBGene00021637	Y47G6A.7
I 3507585	6|A>G|0.833333333	1	+	intron	WBGene00021637	Y47G6A.7
I 3507586	6|A>G|0.5	0.99999	+	intron	WBGene00021637	Y47G6A.7
I 3507589	6|A>G|0.333333333	0.99902	+	intron	WBGene00021637	Y47G6A.7
I 3507700	10|A>G|0.2	0.996564	+	intron	WBGene00021637	Y47G6A.7
I 3507709	9|A>G|0.555555556	1	+	intron	WBGene00021637	Y47G6A.7
I 3507716	11|A>G|0.181818182	0.995734	+	intron	WBGene00021637	Y47G6A.7
I 3507731	10|A>G|0.2	0.996564	+	intron	WBGene00021637	Y47G6A.7
I 3507737	10|A>G|0.2	0.996564	+	intron	WBGene00021637	Y47G6A.7
I 3507742	10|A>G|0.6	1	+	intron	WBGene00021637	Y47G6A.7
I 3507752	9|A>G|0.222222222	0.99731	+	intron	WBGene00021637	Y47G6A.7
I 3506755	5|A>G|0.4	0.999408	+	intron	WBGene00021637	Y47G6A.7
I 3506917	5|A>G|0.6	0.999996	+	intron	WBGene00021637	Y47G6A.7
I 3034193	7|A>G|0.428571429	0.99998	+	three_prime_utr	WBGene00021841	Y54E10BR.2
I 3034146	9|A>G|0.222222222	0.99731	+	three_prime_utr	WBGene00021841	Y54E10BR.2
I 3034147	9|A>G|0.333333333	0.999946	+	three_prime_utr	WBGene00021841	Y54E10BR.2
I 3034166	8|A>G|0.375	0.999966	+	three_prime_utr	WBGene00021841	Y54E10BR.2
I 3034169	8|A>G|0.375	0.999966	+	three_prime_utr	WBGene00021841	Y54E10BR.2
I 3034171	8|A>G|0.25	0.997969	+	three_prime_utr	WBGene00021841	Y54E10BR.2
I 3034180	7|A>G|0.714285714	1	+	three_prime_utr	WBGene00021841	Y54E10BR.2
I 3034328	5|A>G|0.8	1	+	three_prime_utr	WBGene00021841	Y54E10BR.2
I 3034338	5|A>G|0.8	1	+	three_prime_utr	WBGene00021841	Y54E10BR.2
I 3034350	6|A>G|0.5	0.99999	+	three_prime_utr	WBGene00021841	Y54E10BR.2
I 3034383	8|A>G|0.625	1	+	three_prime_utr	WBGene00021841	Y54E10BR.2
I 3034490	12|A>G|0.166666667	0.99482	+	three_prime_utr	WBGene00021841	Y54E10BR.2
I 3034505	14|A>G|0.142857143	0.992751	+	three_prime_utr	WBGene00021841	Y54E10BR.2
I 3027282	6|A>G|0.5	0.99999	+	intron	WBGene00021842	Y54E10BR.3
I 3027324	5|A>G|0.6	0.999996	+	intron	WBGene00021842	Y54E10BR.3
I 3034519	15|A>G|0.4	1	+	three_prime_utr	WBGene00021841	Y54E10BR.2
I 3034569	14|A>G|0.785714286	1	+	three_prime_utr	WBGene00021841	Y54E10BR.2
I 3034526	16|A>G|0.125	0.99037	+	three_prime_utr	WBGene00021841	Y54E10BR.2
I 3034527	16|A>G|0.1875	0.999584	+	three_prime_utr	WBGene00021841	Y54E10BR.2
I 3034546	14|A>G|0.714285714	1	+	three_prime_utr	WBGene00021841	Y54E10BR.2
I 3034547	14|A>G|0.857142857	1	+	three_prime_utr	WBGene00021841	Y54E10BR.2
I 3034552	14|A>G|0.142857143	0.992751	+	three_prime_utr	WBGene00021841	Y54E10BR.2
I 3034556	14|A>G|0.214285714	0.999735	+	three_prime_utr	WBGene00021841	Y54E10BR.2
I 3034557	14|A>G|0.714285714	1	+	three_prime_utr	WBGene00021841	Y54E10BR.2
I 3034567	14|A>G|0.785714286	1	+	three_prime_utr	WBGene00021841	Y54E10BR.2
I 3034568	14|A>G|0.785714286	1	+	three_prime_utr	WBGene00021841	Y54E10BR.2
I 4497522	6|A>G|0.333333333	0.99902	+	intron	WBGene00020131	gcy-28
I 2296739	86|A>G|0.220930233	1	+	three_prime_utr	WBGene00021469	Y39G10AR.11
I 2296745	82|A>G|0.097560976	0.999998	+	three_prime_utr	WBGene00021469	Y39G10AR.11
I 2296746	81|A>G|0.320987654	1	+	three_prime_utr	WBGene00021469	Y39G10AR.11
I 2296755	76|A>G|0.052631579	0.99308	+	three_prime_utr	WBGene00021469	Y39G10AR.11
I 2295502	5|A>G|0.8	1	+	intron	WBGene00021469	Y39G10AR.11
I 2295503	5|A>G|0.6	0.999996	+	intron	WBGene00021469	Y39G10AR.11
I 2296011	5|A>G|0.6	0.999996	+	intron	WBGene00021469	Y39G10AR.11
I 2296046	6|A>G|0.333333333	0.99902	+	intron	WBGene00021469	Y39G10AR.11
I 2296091	7|A>G|0.285714286	0.99854	+	intron	WBGene00021469	Y39G10AR.11
I 2296758	73|A>G|0.397260274	1	+	three_prime_utr	WBGene00021469	Y39G10AR.11
I 2296759	74|A>G|0.148648649	1	+	three_prime_utr	WBGene00021469	Y39G10AR.11
I 2297010	74|A>G|0.216216216	1	+	three_prime_utr	WBGene00021469	Y39G10AR.11
I 2296992	65|A>G|0.153846154	1	+	three_prime_utr	WBGene00021469	Y39G10AR.11
I 2296986	64|A>G|0.0625	0.996274	+	three_prime_utr	WBGene00021469	Y39G10AR.11
I 2296927	67|A>G|0.074626866	0.999462	+	three_prime_utr	WBGene00021469	Y39G10AR.11
I 2296770	66|A>G|0.090909091	0.99995	+	three_prime_utr	WBGene00021469	Y39G10AR.11
I 2296771	65|A>G|0.138461538	1	+	three_prime_utr	WBGene00021469	Y39G10AR.11
I 2296779	64|A>G|0.171875	1	+	three_prime_utr	WBGene00021469	Y39G10AR.11
I 2296902	58|A>G|0.068965517	0.997409	+	three_prime_utr	WBGene00021469	Y39G10AR.11
I 2296910	59|A>G|0.338983051	1	+	three_prime_utr	WBGene00021469	Y39G10AR.11
I 2296917	63|A>G|0.301587302	1	+	three_prime_utr	WBGene00021469	Y39G10AR.11
I 2296920	63|A>G|0.142857143	1	+	three_prime_utr	WBGene00021469	Y39G10AR.11
I 2296925	67|A>G|0.134328358	1	+	three_prime_utr	WBGene00021469	Y39G10AR.11
I 2296926	68|A>G|0.147058824	1	+	three_prime_utr	WBGene00021469	Y39G10AR.11
I 2296985	63|A>G|0.079365079	0.999597	+	three_prime_utr	WBGene00021469	Y39G10AR.11
I 2296937	61|A>G|0.557377049	1	+	three_prime_utr	WBGene00021469	Y39G10AR.11
I 2296938	61|A>G|0.786885246	1	+	three_prime_utr	WBGene00021469	Y39G10AR.11
I 2296940	63|A>G|0.142857143	1	+	three_prime_utr	WBGene00021469	Y39G10AR.11
I 2296960	64|A>G|0.265625	1	+	three_prime_utr	WBGene00021469	Y39G10AR.11
I 2296971	62|A>G|0.129032258	1	+	three_prime_utr	WBGene00021469	Y39G10AR.11
I 2296976	63|A>G|0.238095238	1	+	three_prime_utr	WBGene00021469	Y39G10AR.11
I 2296982	63|A>G|0.174603175	1	+	three_prime_utr	WBGene00021469	Y39G10AR.11
I 2415328	55|A>G|0.090909091	0.99979	+	intron	WBGene00017741	F23C8.13
I 2081472	7|A>G|0.285714286	0.99854	+	intron	WBGene00021352	Y37E3.11
I 2081475	7|A>G|0.428571429	0.99998	+	intron	WBGene00021352	Y37E3.11
I 2081890	11|A>G|0.181818182	0.995734	+	intron	WBGene00021352	Y37E3.11
I 2082403	26|A>G|0.115384615	0.998049	+	intron	WBGene00021352	Y37E3.11
I 2082415	22|A>G|0.727272727	1	+	intron	WBGene00021352	Y37E3.11
I 2082416	22|A>G|0.136363636	0.998838	+	intron	WBGene00021352	Y37E3.11
I 2082429	20|A>G|0.95	1	+	intron	WBGene00021352	Y37E3.11
I 2082432	20|A>G|0.45	1	+	intron	WBGene00021352	Y37E3.11
I 2082437	19|A>G|0.526315789	1	+	intron	WBGene00021352	Y37E3.11
I 2082438	19|A>G|0.210526316	0.999973	+	intron	WBGene00021352	Y37E3.11
I 2082447	15|A>G|0.466666667	1	+	intron	WBGene00021352	Y37E3.11
I 2082454	15|A>G|0.733333333	1	+	intron	WBGene00021352	Y37E3.11
I 2082455	14|A>G|0.214285714	0.999735	+	intron	WBGene00021352	Y37E3.11
I 2082459	15|A>G|0.266666667	0.999991	+	intron	WBGene00021352	Y37E3.11
I 2082467	14|A>G|0.785714286	1	+	intron	WBGene00021352	Y37E3.11
I 2076673	23|A>G|0.173913043	0.999937	+	three_prime_utr	WBGene00021351	Y37E3.10
I 2076644	20|A>G|0.5	1	+	three_prime_utr	WBGene00021351	Y37E3.10
I 2076645	20|A>G|0.2	0.999966	+	three_prime_utr	WBGene00021351	Y37E3.10
I 2076648	20|A>G|0.4	1	+	three_prime_utr	WBGene00021351	Y37E3.10
I 2076649	21|A>G|0.333333333	1	+	three_prime_utr	WBGene00021351	Y37E3.10
I 2076654	21|A>G|0.285714286	1	+	three_prime_utr	WBGene00021351	Y37E3.10
I 2076655	21|A>G|0.19047619	0.999957	+	three_prime_utr	WBGene00021351	Y37E3.10
I 2076668	20|A>G|0.25	0.999999	+	three_prime_utr	WBGene00021351	Y37E3.10
I 2076680	23|A>G|0.173913043	0.999937	+	three_prime_utr	WBGene00021351	Y37E3.10
I 2082473	14|A>G|0.142857143	0.992751	+	intron	WBGene00021352	Y37E3.11
I 2198343	5|A>G|0.8	1	+	intron	WBGene00021009	afd-1
I 2198366	5|A>G|0.8	1	+	intron	WBGene00021009	afd-1
I 2082501	11|A>G|0.181818182	0.995734	+	intron	WBGene00021352	Y37E3.11
I 2082514	6|A>G|0.5	0.99999	+	intron	WBGene00021352	Y37E3.11
I 2415326	56|A>G|0.125	0.999999	+	intron	WBGene00017741	F23C8.13
I 2733555	5|A>G|0.4	0.999408	+	intron	WBGene00022126	Y71F9B.2
I 2734484	5|A>G|0.4	0.999408	+	intron	WBGene00022126	Y71F9B.2
I 2734496	5|A>G|0.4	0.999408	+	intron	WBGene00022126	Y71F9B.2
I 2734497	5|A>G|0.8	1	+	intron	WBGene00022126	Y71F9B.2
I 2715402	5|A>G|0.4	0.999408	+	intron	WBGene00003006	lin-17
I 2715409	5|A>G|0.4	0.999408	+	intron	WBGene00003006	lin-17
I 2715414	5|A>G|0.6	0.999996	+	intron	WBGene00003006	lin-17
I 2715431	7|A>G|0.285714286	0.99854	+	intron	WBGene00003006	lin-17
I 2415352	55|A>G|0.109090909	0.999983	+	intron	WBGene00017741	F23C8.13
I 2417869	9|A>G|0.444444444	0.999999	+	intron	WBGene00017741	F23C8.13
I 2417879	10|A>G|0.8	1	+	intron	WBGene00017741	F23C8.13
I 2417882	10|A>G|0.2	0.996564	+	intron	WBGene00017741	F23C8.13
I 2417886	10|A>G|0.2	0.996564	+	intron	WBGene00017741	F23C8.13
I 2417906	10|A>G|0.2	0.996564	+	intron	WBGene00017741	F23C8.13
I 2417907	10|A>G|0.3	0.99992	+	intron	WBGene00017741	F23C8.13
I 2415382	43|A>G|0.837209302	1	+	intron	WBGene00017741	F23C8.13
I 2415383	43|A>G|0.395348837	1	+	intron	WBGene00017741	F23C8.13
I 2415395	42|A>G|0.095238095	0.999246	+	intron	WBGene00017741	F23C8.13
I 2415501	37|A>G|0.216216216	1	+	intron	WBGene00017741	F23C8.13
I 2415517	29|A>G|0.793103448	1	+	intron	WBGene00017741	F23C8.13
I 2415522	31|A>G|0.225806452	1	+	intron	WBGene00017741	F23C8.13
I 2415532	33|A>G|0.363636364	1	+	intron	WBGene00017741	F23C8.13
I 2415543	42|A>G|0.119047619	0.999944	+	intron	WBGene00017741	F23C8.13
I 2415553	45|A>G|0.6	1	+	intron	WBGene00017741	F23C8.13
I 2415567	48|A>G|0.479166667	1	+	intron	WBGene00017741	F23C8.13
I 2415583	47|A>G|0.085106383	0.998833	+	intron	WBGene00017741	F23C8.13
I 2416485	5|A>G|0.4	0.999408	+	intron	WBGene00017741	F23C8.13
I 2416487	5|A>G|0.4	0.999408	+	intron	WBGene00017741	F23C8.13
I 2616606	18|A>G|0.166666667	0.999388	+	intron	WBGene00000832	ctn-1
V 13037915	19|T>C|0.210526316	0.999973	-	three_prime_utr	WBGene00012337	W07G4.3
V 17942638	8|T>C|0.25	0.997969	-	intron	WBGene00001080	dpy-21
V 17942655	8|T>C|0.25	0.997969	-	intron	WBGene00001080	dpy-21
V 17942676	7|T>C|0.285714286	0.99854	-	intron	WBGene00001080	dpy-21
V 17942620	8|T>C|0.75	1	-	intron	WBGene00001080	dpy-21
V 17942592	9|T>C|0.444444444	0.999999	-	intron	WBGene00001080	dpy-21
V 16609735	5|T>C|0.6	0.999996	-	intron	WBGene00194769	Y32B12C.5
V 16609732	5|T>C|0.4	0.999408	-	intron	WBGene00194769	Y32B12C.5
V 18778804	5|T>C|0.8	1	-	intron	WBGene00012452	Y17D7B.4
V 18897822	5|T>C|0.4	0.999408	-	intron	WBGene00013584	nhr-243
V 18778803	5|T>C|0.6	0.999996	-	intron	WBGene00012452	Y17D7B.4
V 18778072	6|T>C|0.5	0.99999	-	intron	WBGene00012452	Y17D7B.4
V 18778062	6|T>C|0.333333333	0.99902	-	intron	WBGene00012452	Y17D7B.4
V 18778061	6|T>C|0.5	0.99999	-	intron	WBGene00012452	Y17D7B.4
V 18778057	6|T>C|0.833333333	1	-	intron	WBGene00012452	Y17D7B.4
V 18778054	6|T>C|0.333333333	0.99902	-	intron	WBGene00012452	Y17D7B.4
V 18778003	5|T>C|0.8	1	-	intron	WBGene00012452	Y17D7B.4
II 6999353	6|A>G|0.333333333	0.99902	+	intron	WBGene00006831	unc-104
II 6998828	5|A>G|0.4	0.999408	+	intron	WBGene00006831	unc-104
II 6998845	6|A>G|0.333333333	0.99902	+	intron	WBGene00006831	unc-104
II 6998855	8|A>G|0.375	0.999966	+	intron	WBGene00006831	unc-104
II 6998891	9|A>G|0.333333333	0.999946	+	intron	WBGene00006831	unc-104
V 15552293	5|T>C|0.4	0.999408	-	intron	WBGene00000057	acr-18
V 15552130	5|T>C|0.4	0.999408	-	intron	WBGene00000057	acr-18
V 20251613	11|T>C|0.181818182	0.995734	-	three_prime_utr	WBGene00007017	mdt-17
V 20251612	11|T>C|0.272727273	0.999886	-	three_prime_utr	WBGene00007017	mdt-17
V 20251610	11|T>C|0.454545455	1	-	three_prime_utr	WBGene00007017	mdt-17
V 20251609	11|T>C|0.545454545	1	-	three_prime_utr	WBGene00007017	mdt-17
V 20251601	11|T>C|0.454545455	1	-	three_prime_utr	WBGene00007017	mdt-17
V 20251598	11|T>C|0.454545455	1	-	three_prime_utr	WBGene00007017	mdt-17
V 20251595	12|T>C|0.25	0.999845	-	three_prime_utr	WBGene00007017	mdt-17
V 20251282	8|T>C|0.25	0.997969	-	three_prime_utr	WBGene00007017	mdt-17
V 20251272	8|T>C|0.625	1	-	three_prime_utr	WBGene00007017	mdt-17
V 20251265	8|T>C|0.625	1	-	three_prime_utr	WBGene00007017	mdt-17
V 20251225	8|T>C|0.25	0.997969	-	three_prime_utr	WBGene00007017	mdt-17
V 20251208	5|T>C|0.4	0.999408	-	three_prime_utr	WBGene00007017	mdt-17
V 20251199	5|T>C|0.4	0.999408	-	three_prime_utr	WBGene00007017	mdt-17
V 20251185	5|T>C|0.4	0.999408	-	three_prime_utr	WBGene00007017	mdt-17
V 20251184	5|T>C|0.4	0.999408	-	three_prime_utr	WBGene00007017	mdt-17
V 20251092	5|T>C|0.4	0.999408	-	three_prime_utr	WBGene00007017	mdt-17
V 20251091	5|T>C|0.6	0.999996	-	three_prime_utr	WBGene00007017	mdt-17
V 20251089	5|T>C|0.4	0.999408	-	three_prime_utr	WBGene00007017	mdt-17
V 20251290	7|T>C|0.428571429	0.99998	-	three_prime_utr	WBGene00007017	mdt-17
V 20251068	5|T>C|0.4	0.999408	-	three_prime_utr	WBGene00007017	mdt-17
V 20251062	5|T>C|0.4	0.999408	-	three_prime_utr	WBGene00007017	mdt-17
V 20251057	5|T>C|0.6	0.999996	-	three_prime_utr	WBGene00007017	mdt-17
V 20251053	5|T>C|0.4	0.999408	-	three_prime_utr	WBGene00007017	mdt-17
V 20251594	13|T>C|0.153846154	0.993825	-	three_prime_utr	WBGene00007017	mdt-17
V 20251587	12|T>C|0.416666667	1	-	three_prime_utr	WBGene00007017	mdt-17
V 20251571	8|T>C|0.25	0.997969	-	three_prime_utr	WBGene00007017	mdt-17
V 20251567	8|T>C|0.25	0.997969	-	three_prime_utr	WBGene00007017	mdt-17
V 20251563	9|T>C|0.444444444	0.999999	-	three_prime_utr	WBGene00007017	mdt-17
V 20251554	8|T>C|0.5	1	-	three_prime_utr	WBGene00007017	mdt-17
V 20251552	8|T>C|0.375	0.999966	-	three_prime_utr	WBGene00007017	mdt-17
V 20251540	8|T>C|0.625	1	-	three_prime_utr	WBGene00007017	mdt-17
V 20251322	6|T>C|0.333333333	0.99902	-	three_prime_utr	WBGene00007017	mdt-17
V 20251372	8|T>C|0.375	0.999966	-	three_prime_utr	WBGene00007017	mdt-17
V 20251365	9|T>C|0.222222222	0.99731	-	three_prime_utr	WBGene00007017	mdt-17
V 20251357	9|T>C|0.222222222	0.99731	-	three_prime_utr	WBGene00007017	mdt-17
V 20251356	9|T>C|0.333333333	0.999946	-	three_prime_utr	WBGene00007017	mdt-17
V 20251345	8|T>C|0.5	1	-	three_prime_utr	WBGene00007017	mdt-17
V 20251344	8|T>C|0.625	1	-	three_prime_utr	WBGene00007017	mdt-17
V 20251342	8|T>C|0.25	0.997969	-	three_prime_utr	WBGene00007017	mdt-17
V 20251338	8|T>C|0.25	0.997969	-	three_prime_utr	WBGene00007017	mdt-17
V 20498677	13|T>C|0.153846154	0.993825	-	intron	WBGene00012615	dct-16
V 20498667	12|T>C|0.166666667	0.99482	-	intron	WBGene00012615	dct-16
V 20498653	15|T>C|0.266666667	0.999991	-	intron	WBGene00012615	dct-16
V 20498457	12|T>C|0.166666667	0.99482	-	intron	WBGene00012615	dct-16
V 20332255	5|T>C|0.4	0.999408	-	intron	WBGene00077669	Y38H6A.5
V 20334912	6|T>C|0.333333333	0.99902	-	intron	WBGene00077669	Y38H6A.5
V 20334900	6|T>C|0.333333333	0.99902	-	intron	WBGene00077669	Y38H6A.5
V 20332259	5|T>C|0.4	0.999408	-	intron	WBGene00077669	Y38H6A.5
V 20332087	5|T>C|0.6	0.999996	-	intron	WBGene00077669	Y38H6A.5
V 20332086	5|T>C|0.6	0.999996	-	intron	WBGene00077669	Y38H6A.5
V 20332085	5|T>C|0.4	0.999408	-	intron	WBGene00077669	Y38H6A.5
V 20332053	7|T>C|0.428571429	0.99998	-	intron	WBGene00077669	Y38H6A.5
V 20332050	7|T>C|0.857142857	1	-	intron	WBGene00077669	Y38H6A.5
V 20332043	6|T>C|0.5	0.99999	-	intron	WBGene00077669	Y38H6A.5
V 20332036	5|T>C|0.8	1	-	intron	WBGene00077669	Y38H6A.5
V 20332032	5|T>C|0.4	0.999408	-	intron	WBGene00077669	Y38H6A.5
V 20332018	5|T>C|0.6	0.999996	-	intron	WBGene00077669	Y38H6A.5
V 20331997	6|T>C|0.5	0.99999	-	intron	WBGene00077669	Y38H6A.5
V 20331995	6|T>C|0.833333333	1	-	intron	WBGene00077669	Y38H6A.5
V 20331971	7|T>C|0.714285714	1	-	intron	WBGene00077669	Y38H6A.5
V 19884662	8|T>C|0.25	0.997969	-	intron	WBGene00001629	gly-4
V 19523308	5|T>C|0.4	0.999408	-	intron	WBGene00012813	Y43F8B.2
V 19888169	7|T>C|0.714285714	1	-	intron	WBGene00001629	gly-4
V 19888160	8|T>C|0.25	0.997969	-	intron	WBGene00001629	gly-4
V 19887778	5|T>C|0.4	0.999408	-	intron	WBGene00001629	gly-4
V 19892057	5|T>C|0.6	0.999996	-	intron	WBGene00001629	gly-4
V 19886746	12|T>C|0.166666667	0.99482	-	intron	WBGene00001629	gly-4
V 13470943	5|T>C|0.8	1	-	intron	WBGene00011692	T10G3.1
V 13470948	5|T>C|0.4	0.999408	-	intron	WBGene00011692	T10G3.1
V 13470947	5|T>C|0.6	0.999996	-	intron	WBGene00011692	T10G3.1
V 13470939	6|T>C|0.333333333	0.99902	-	intron	WBGene00011692	T10G3.1
V 13470936	6|T>C|0.666666667	1	-	intron	WBGene00011692	T10G3.1
V 13470918	6|T>C|0.666666667	1	-	intron	WBGene00011692	T10G3.1
V 13470910	6|T>C|0.5	0.99999	-	intron	WBGene00011692	T10G3.1
V 13470906	6|T>C|0.5	0.99999	-	intron	WBGene00011692	T10G3.1
V 13470901	7|T>C|0.571428571	1	-	intron	WBGene00011692	T10G3.1
V 13470893	7|T>C|0.428571429	0.99998	-	intron	WBGene00011692	T10G3.1
II 12281250	5|A>G|0.6	0.999996	+	intron	WBGene00002063	ife-5
II 12281243	5|A>G|0.8	1	+	intron	WBGene00002063	ife-5
V 13038586	18|T>C|0.888888889	1	-	three_prime_utr	WBGene00012337	W07G4.3
V 13038582	18|T>C|0.333333333	1	-	three_prime_utr	WBGene00012337	W07G4.3
V 13038579	18|T>C|0.555555556	1	-	three_prime_utr	WBGene00012337	W07G4.3
V 13038569	14|T>C|0.142857143	0.992751	-	three_prime_utr	WBGene00012337	W07G4.3
V 13038568	14|T>C|0.5	1	-	three_prime_utr	WBGene00012337	W07G4.3
V 13038567	14|T>C|0.142857143	0.992751	-	three_prime_utr	WBGene00012337	W07G4.3
V 13038566	14|T>C|0.357142857	1	-	three_prime_utr	WBGene00012337	W07G4.3
V 13038562	14|T>C|0.857142857	1	-	three_prime_utr	WBGene00012337	W07G4.3
V 13038549	7|T>C|0.428571429	0.99998	-	three_prime_utr	WBGene00012337	W07G4.3
II 12281244	5|A>G|0.8	1	+	intron	WBGene00002063	ife-5
V 13038542	6|T>C|0.333333333	0.99902	-	three_prime_utr	WBGene00012337	W07G4.3
II 12281188	6|A>G|0.833333333	1	+	intron	WBGene00002063	ife-5
II 12281195	6|A>G|0.666666667	1	+	intron	WBGene00002063	ife-5
II 12281202	6|A>G|0.5	0.99999	+	intron	WBGene00002063	ife-5
II 12281207	6|A>G|0.833333333	1	+	intron	WBGene00002063	ife-5
II 12281218	6|A>G|0.333333333	0.99902	+	intron	WBGene00002063	ife-5
V 13038548	7|T>C|0.571428571	1	-	three_prime_utr	WBGene00012337	W07G4.3
V 13037963	19|T>C|0.368421053	1	-	three_prime_utr	WBGene00012337	W07G4.3
V 13038004	10|T>C|0.2	0.996564	-	three_prime_utr	WBGene00012337	W07G4.3
V 13038003	10|T>C|0.2	0.996564	-	three_prime_utr	WBGene00012337	W07G4.3
V 13037995	11|T>C|0.454545455	1	-	three_prime_utr	WBGene00012337	W07G4.3
V 13037994	12|T>C|0.333333333	0.999997	-	three_prime_utr	WBGene00012337	W07G4.3
V 13037985	16|T>C|0.1875	0.999584	-	three_prime_utr	WBGene00012337	W07G4.3
V 13037980	17|T>C|0.235294118	0.999983	-	three_prime_utr	WBGene00012337	W07G4.3
V 13037976	18|T>C|0.777777778	1	-	three_prime_utr	WBGene00012337	W07G4.3
V 13037970	19|T>C|0.736842105	1	-	three_prime_utr	WBGene00012337	W07G4.3
V 13037969	19|T>C|0.421052632	1	-	three_prime_utr	WBGene00012337	W07G4.3
V 13037968	19|T>C|0.210526316	0.999973	-	three_prime_utr	WBGene00012337	W07G4.3
V 13037967	19|T>C|0.263157895	0.999999	-	three_prime_utr	WBGene00012337	W07G4.3
V 13037966	19|T>C|0.157894737	0.999271	-	three_prime_utr	WBGene00012337	W07G4.3
V 13038015	6|T>C|0.333333333	0.99902	-	three_prime_utr	WBGene00012337	W07G4.3
V 13037956	19|T>C|0.368421053	1	-	three_prime_utr	WBGene00012337	W07G4.3
V 13037953	19|T>C|0.210526316	0.999973	-	three_prime_utr	WBGene00012337	W07G4.3
V 13037952	19|T>C|0.894736842	1	-	three_prime_utr	WBGene00012337	W07G4.3
V 13037951	19|T>C|0.578947368	1	-	three_prime_utr	WBGene00012337	W07G4.3
V 13037950	19|T>C|0.368421053	1	-	three_prime_utr	WBGene00012337	W07G4.3
V 13037936	19|T>C|0.473684211	1	-	three_prime_utr	WBGene00012337	W07G4.3
V 13037926	19|T>C|0.315789474	1	-	three_prime_utr	WBGene00012337	W07G4.3
V 13037925	19|T>C|0.210526316	0.999973	-	three_prime_utr	WBGene00012337	W07G4.3
V 13038019	5|T>C|0.4	0.999408	-	three_prime_utr	WBGene00012337	W07G4.3
V 13038314	15|T>C|0.133333333	0.991599	-	three_prime_utr	WBGene00012337	W07G4.3
V 13038421	8|T>C|0.25	0.997969	-	three_prime_utr	WBGene00012337	W07G4.3
V 13038416	8|T>C|0.5	1	-	three_prime_utr	WBGene00012337	W07G4.3
V 13038415	8|T>C|0.375	0.999966	-	three_prime_utr	WBGene00012337	W07G4.3
V 13038414	8|T>C|0.375	0.999966	-	three_prime_utr	WBGene00012337	W07G4.3
V 13038413	8|T>C|0.5	1	-	three_prime_utr	WBGene00012337	W07G4.3
V 13038412	8|T>C|0.5	1	-	three_prime_utr	WBGene00012337	W07G4.3
V 13038396	10|T>C|0.4	0.999999	-	three_prime_utr	WBGene00012337	W07G4.3
V 13038373	14|T>C|0.214285714	0.999735	-	three_prime_utr	WBGene00012337	W07G4.3
V 13038372	14|T>C|0.857142857	1	-	three_prime_utr	WBGene00012337	W07G4.3
V 13038366	16|T>C|0.5625	1	-	three_prime_utr	WBGene00012337	W07G4.3
V 13038325	15|T>C|0.266666667	0.999991	-	three_prime_utr	WBGene00012337	W07G4.3
V 13038324	15|T>C|0.333333333	1	-	three_prime_utr	WBGene00012337	W07G4.3
V 13038316	15|T>C|0.333333333	1	-	three_prime_utr	WBGene00012337	W07G4.3
V 13038315	15|T>C|0.466666667	1	-	three_prime_utr	WBGene00012337	W07G4.3
V 13038307	15|T>C|0.133333333	0.991599	-	three_prime_utr	WBGene00012337	W07G4.3
V 13038240	5|T>C|0.6	0.999996	-	three_prime_utr	WBGene00012337	W07G4.3
V 13038295	13|T>C|0.615384615	1	-	three_prime_utr	WBGene00012337	W07G4.3
V 13038294	13|T>C|0.692307692	1	-	three_prime_utr	WBGene00012337	W07G4.3
V 13038275	9|T>C|0.666666667	1	-	three_prime_utr	WBGene00012337	W07G4.3
V 13038274	9|T>C|0.777777778	1	-	three_prime_utr	WBGene00012337	W07G4.3
V 13038273	9|T>C|0.444444444	0.999999	-	three_prime_utr	WBGene00012337	W07G4.3
V 13038269	9|T>C|0.222222222	0.99731	-	three_prime_utr	WBGene00012337	W07G4.3
V 13038264	9|T>C|0.222222222	0.99731	-	three_prime_utr	WBGene00012337	W07G4.3
V 13038258	9|T>C|0.222222222	0.99731	-	three_prime_utr	WBGene00012337	W07G4.3
V 13038246	5|T>C|0.6	0.999996	-	three_prime_utr	WBGene00012337	W07G4.3
II 11985250	5|A>G|0.4	0.999408	+	intron	WBGene00012458	ash-2
II 10387383	6|A>G|0.833333333	1	+	intron	WBGene00011661	ztf-27
V 13998745	5|T>C|0.6	0.999996	-	intron	WBGene00010259	ric-7
V 13998744	5|T>C|0.6	0.999996	-	intron	WBGene00010259	ric-7
II 5661798	5|A>G|0.4	0.999408	+	intron	WBGene00016115	mdt-26
I 14538678	11|A>G|0.181818182	0.995734	+	intron	WBGene00013683	zoo-1
I 13777757	6|A>G|0.666666667	1	+	intron	WBGene00012576	Y37H9A.1
I 13777758	7|A>G|0.285714286	0.99854	+	intron	WBGene00012576	Y37H9A.1
I 13777810	8|A>G|0.25	0.997969	+	intron	WBGene00012576	Y37H9A.1
I 13773397	6|A>G|0.5	0.99999	+	intron	WBGene00012576	Y37H9A.1
I 13584478	6|A>G|0.333333333	0.99902	+	intron	WBGene00013596	Y87G2A.7
I 13584487	6|A>G|0.833333333	1	+	intron	WBGene00013596	Y87G2A.7
I 13584496	6|A>G|0.666666667	1	+	intron	WBGene00013596	Y87G2A.7
I 13584544	5|A>G|0.8	1	+	intron	WBGene00013596	Y87G2A.7
I 13773361	6|A>G|0.5	0.99999	+	intron	WBGene00012576	Y37H9A.1
I 13773369	6|A>G|0.333333333	0.99902	+	intron	WBGene00012576	Y37H9A.1
I 13773380	6|A>G|0.5	0.99999	+	intron	WBGene00012576	Y37H9A.1
I 13873362	5|A>G|0.4	0.999408	+	intron	WBGene00006382	taf-1
X 3030370	9|T>C|0.222222222	0.99731	-	intergenic	intergenic	#N/A
X 3030365	10|T>C|0.2	0.996564	-	intergenic	intergenic	#N/A
X 3030347	10|T>C|0.2	0.996564	-	intergenic	intergenic	#N/A
X 3029433	8|T>C|0.25	0.997969	-	intergenic	intergenic	#N/A
X 3029418	7|T>C|0.285714286	0.99854	-	intergenic	intergenic	#N/A
I 13584458	6|A>G|0.333333333	0.99902	+	intron	WBGene00013596	Y87G2A.7
X 4768277	6|T>C|0.333333333	0.99902	-	intron	WBGene00003807	npr-1
I 11678711	8|A>G|0.25	0.997969	+	intron	WBGene00002232	kpc-1
I 13584454	6|A>G|0.833333333	1	+	intron	WBGene00013596	Y87G2A.7
I 13584049	5|A>G|0.8	1	+	intron	WBGene00013596	Y87G2A.7
I 13584063	5|A>G|0.8	1	+	intron	WBGene00013596	Y87G2A.7
I 13584076	5|A>G|0.8	1	+	intron	WBGene00006709	ubc-14
I 12820004	5|A>G|0.4	0.999408	+	intron	WBGene00001746	gsk-3
I 12819558	6|A>G|0.5	0.99999	+	intron	WBGene00001746	gsk-3
I 12819569	6|A>G|0.666666667	1	+	intron	WBGene00001746	gsk-3
I 12819570	6|A>G|0.333333333	0.99902	+	intron	WBGene00001746	gsk-3
I 12819573	6|A>G|0.333333333	0.99902	+	intron	WBGene00001746	gsk-3
I 12819580	6|A>G|0.5	0.99999	+	intron	WBGene00001746	gsk-3
I 12819595	8|A>G|0.25	0.997969	+	intron	WBGene00001746	gsk-3
[truncated: 4,204 more rows]
