# Supplementary material for: Profiling neural editomes reveals a molecular mechanism to regulate RNA editing during development
Source: HighWire-hosted journal article supplement (doi:10.1101/gr.267575.120), 2020-12-18
Supplement: Supplemental_Table_S4.xlsx [file Supplemental_Table_S4.xlsx]

## Sheet: Variant calling combined sites
Supplemental Table 4: Quantification of editing in both L1 and adult neural RNA-seq datasets (related to Fig. 3A). De novo identified editing sites from both L1 and adult neural cells were combined to generate a list of neural editing sites (6352 sites). Editing levels were quantified at each of these sites using variant calling. Sites are listed by chromosome and nucleotide position (column A) a…
Chr position	feature	wbID	Gene Name	Total # of reads in L1	Total # of variant reads in L1	% variance in L1	Total # of reads in adults	Total # of variant reads in adults	% variance in adults
I 14855621	CDS	WBGene00000088	aex-5	204	9	4.41	3	1	33.3333
I 14855616	CDS	WBGene00000088	aex-5	259	4	1.54	0	0	#DIV/0!
I 14855620	CDS	WBGene00000088	aex-5	203	9	4.43	0	0	#DIV/0!
I 14855647	CDS	WBGene00000088	aex-5	198	4	2.02	0	0	#DIV/0!
I 14855638	CDS	WBGene00000088	aex-5	202	4	1.98	0	0	#DIV/0!
I 14855641	CDS	WBGene00000088	aex-5	200	10	5	0	0	#DIV/0!
I 14855642	CDS	WBGene00000088	aex-5	200	8	4	0	0	#DIV/0!
I 14855592	CDS	WBGene00000088	aex-5	195	4	2.05	3	1	33.3333
I 14855586	CDS	WBGene00000088	aex-5	198	5	2.53	3	1	33.3333
I 14855727	CDS	WBGene00000088	aex-5	198	14	7.07	19	1	5.26316
I 14855728	CDS	WBGene00000088	aex-5	197	7	3.55	0	0	#DIV/0!
I 14855723	CDS	WBGene00000088	aex-5	195	26	13.33	0	0	#DIV/0!
I 14855689	CDS	WBGene00000088	aex-5	202	12	5.94	0	0	#DIV/0!
I 14855722	CDS	WBGene00000088	aex-5	197	4	2.03	0	0	#DIV/0!
I 14855678	CDS	WBGene00000088	aex-5	200	20	10	0	0	#DIV/0!
I 14855679	CDS	WBGene00000088	aex-5	201	21	10.45	0	0	#DIV/0!
X 8069847	CDS	WBGene00015947	C18A11.1	0	0	0	8	2	25
X 5406817	CDS	WBGene00016559	C41A3.2	0	0	0	3	2	66.6667
IV 11226065	CDS	WBGene00000699	col-125	16	2	12.5	632	4	0.632911
V 7181584	CDS	WBGene00017313	cpsf-2	0	0	0	7	2	28.5714
MtDNA 8429	CDS	WBGene00010964	ctc-1	98	97	98.98	390	389	99.7436
III 13390941	CDS	WBGene00001035	dnj-17	11	2	18.18	0	0	#DIV/0!
II 1127698	CDS	WBGene00021103	eri-3	10	2	20	0	0	#DIV/0!
IV 10258465	CDS	WBGene00008511	F01G10.9	0	0	0	3	3	100
V 8855267	CDS	WBGene00017190	F07B7.12	27	14	51.85	0	0	#DIV/0!
V 8855268	CDS	WBGene00017190	F07B7.12	28	5	17.86	0	0	#DIV/0!
II 7123751	CDS	WBGene00017344	F10E7.2	25	4	16	51	3	5.88235
X 6601574	CDS	WBGene00044574	F23G4.1	7	3	42.86	0	0	#DIV/0!
X 6601570	CDS	WBGene00044574	F23G4.1	7	2	28.57	0	0	#DIV/0!
X 6601566	CDS	WBGene00044574	F23G4.1	6	4	66.67	0	0	#DIV/0!
X 6601575	CDS	WBGene00044574	F23G4.1	7	4	57.14	0	0	#DIV/0!
X 6601578	CDS	WBGene00044574	F23G4.1	8	2	25	0	0	#DIV/0!
X 6601598	CDS	WBGene00044574	F23G4.1	15	2	13.33	0	0	#DIV/0!
V 7439475	CDS	WBGene00017792	F25E5.16	55	6	10.91	0	0	#DIV/0!
V 10890018	CDS	WBGene00009334	F32D8.12	0	0	0	7	2	28.5714
II 2183289	CDS	WBGene00016340	gba-2	9	2	22.22	0	0	#DIV/0!
II 2183260	CDS	WBGene00016340	gba-2	8	2	25	0	0	#DIV/0!
II 2183273	CDS	WBGene00016340	gba-2	9	2	22.22	0	0	#DIV/0!
V 6395948	CDS	WBGene00001581	gfi-1	76	1	1.32	10	2	20
I 1071729	CDS	WBGene00001745	gsa-1	70	1	1.43	17	13	76.4706
X 6784062	CDS	WBGene00019226	H22K11.3	9	2	22.22	0	0	#DIV/0!
IV 12031741	CDS	WBGene00011740	mrpl-51	0	0	0	20	3	15
IV 7053037	CDS	WBGene00003695	nhr-105	0	0	0	4	2	50
I 2590667	CDS	WBGene00004226	ptr-12	0	0	0	4	2	50
IV 10170144	CDS	WBGene00004254	pxf-1	22	3	13.64	0	0	#DIV/0!
V 18242853	CDS	WBGene00011207	R10E8.1	10	2	20	0	0	#DIV/0!
III 1574858	intron	WBGene00022051	rep-1	11	2	18.18	0	0	#DIV/0!
III 1574840	intron	WBGene00022051	rep-1	11	2	18.18	0	0	#DIV/0!
III 1574857	intron	WBGene00022051	rep-1	11	2	18.18	0	0	#DIV/0!
X 11396988	CDS	WBGene00004831	slo-2	0	0	0	7	2	28.5714
V 12290025	CDS	WBGene00010097	srpa-68	64	2	3.12	6	2	33.3333
V 6440779	CDS	WBGene00020276	T05H4.15	10	2	20	0	0	#DIV/0!
X 3686967	CDS	WBGene00015356	tag-278	14	2	14.29	2	2	100
IV 7598559	CDS	WBGene00018468	tag-80	12	2	16.67	0	0	#DIV/0!
IV 7597400	CDS	WBGene00018468	tag-80	13	3	23.08	0	0	#DIV/0!
IV 7598537	CDS	WBGene00018468	tag-80	10	7	70	0	0	#DIV/0!
V 6172875	CDS	WBGene00006436	ttn-1	5	2	40	47	26	55.3191
V 6171795	CDS	WBGene00006436	ttn-1	0	0	0	89	31	34.8315
V 6173811	CDS	WBGene00006436	ttn-1	6	1	16.67	97	26	26.8041
IV 9992056	CDS	WBGene00006699	uba-1	66	1	1.52	8	3	37.5
III 12620843	CDS	WBGene00013735	Y111B2A.12	0	0	0	9	3	33.3333
I 2623066	CDS	WBGene00021269	Y23H5A.2	0	0	0	7	2	28.5714
II 3321904	CDS	WBGene00021590	Y46D2A.2	16	2	12.5	0	0	#DIV/0!
II 3321908	CDS	WBGene00021590	Y46D2A.2	16	2	12.5	0	0	#DIV/0!
II 3321932	CDS	WBGene00021590	Y46D2A.2	17	2	11.76	0	0	#DIV/0!
II 3321911	CDS	WBGene00021590	Y46D2A.2	16	2	12.5	0	0	#DIV/0!
II 3321912	CDS	WBGene00021590	Y46D2A.2	17	2	11.76	0	0	#DIV/0!
I 3558299	CDS	WBGene00021646	Y47G6A.21	0	0	0	13	2	15.3846
I 11013370	CDS	WBGene00077539	Y52B11A.12	7	3	42.86	0	0	#DIV/0!
I 11013760	CDS	WBGene00077539	Y52B11A.12	10	6	60	0	0	#DIV/0!
I 11013690	CDS	WBGene00077539	Y52B11A.12	9	2	22.22	0	0	#DIV/0!
I 11013811	CDS	WBGene00077539	Y52B11A.12	10	3	30	0	0	#DIV/0!
I 11013157	CDS	WBGene00077539	Y52B11A.12	10	4	40	0	0	#DIV/0!
IV 10950006	CDS	WBGene00013474	Y69E1A.2	0	0	0	22	11	50
I 2981761	CDS	WBGene00044894	Y71F9AR.4	0	0	0	7	3	42.8571
X 58852	intergenic	intergenic	N/A	7	6	85.71	0	0	#DIV/0!
X 58851	intergenic	intergenic	N/A	7	6	85.71	0	0	#DIV/0!
I 3411278	exon	WBGene00219710	anr-45	12	6	50	0	0	#DIV/0!
I 3411269	exon	WBGene00219710	anr-45	12	4	33.33	0	0	#DIV/0!
I 3411321	exon	WBGene00219710	anr-45	11	4	36.36	0	0	#DIV/0!
I 3411305	exon	WBGene00219710	anr-45	11	3	27.27	0	0	#DIV/0!
I 3411289	exon	WBGene00219710	anr-45	11	3	27.27	0	0	#DIV/0!
I 3411279	exon	WBGene00219710	anr-45	12	9	75	0	0	#DIV/0!
I 3411268	exon	WBGene00219710	anr-45	12	9	75	0	0	#DIV/0!
I 3411324	exon	WBGene00219710	anr-45	11	7	63.64	0	0	#DIV/0!
I 3411225	exon	WBGene00219710	anr-45	12	2	16.67	0	0	#DIV/0!
I 3411267	exon	WBGene00219710	anr-45	12	6	50	0	0	#DIV/0!
I 3411217	exon	WBGene00219710	anr-45	12	6	50	0	0	#DIV/0!
I 3411216	exon	WBGene00219710	anr-45	12	6	50	0	0	#DIV/0!
I 3411242	exon	WBGene00219710	anr-45	13	6	46.15	0	0	#DIV/0!
I 3411246	exon	WBGene00219710	anr-45	13	3	23.08	0	0	#DIV/0!
I 3411263	exon	WBGene00219710	anr-45	12	3	25	0	0	#DIV/0!
I 3411262	exon	WBGene00219710	anr-45	12	3	25	0	0	#DIV/0!
I 3410942	exon	WBGene00219710	anr-45	8	7	87.5	0	0	#DIV/0!
I 3410932	exon	WBGene00219710	anr-45	9	3	33.33	0	0	#DIV/0!
I 3410927	exon	WBGene00219710	anr-45	9	3	33.33	0	0	#DIV/0!
I 3410926	exon	WBGene00219710	anr-45	9	3	33.33	0	0	#DIV/0!
I 3410953	exon	WBGene00219710	anr-45	10	2	20	0	0	#DIV/0!
I 3411139	exon	WBGene00219710	anr-45	5	3	60	0	0	#DIV/0!
I 3410990	exon	WBGene00219710	anr-45	9	3	33.33	0	0	#DIV/0!
I 3410988	exon	WBGene00219710	anr-45	10	2	20	0	0	#DIV/0!
I 3410983	exon	WBGene00219710	anr-45	10	3	30	0	0	#DIV/0!
I 3410916	exon	WBGene00219710	anr-45	9	3	33.33	0	0	#DIV/0!
I 3410886	exon	WBGene00219710	anr-45	7	3	42.86	0	0	#DIV/0!
I 3410871	exon	WBGene00219710	anr-45	6	3	50	0	0	#DIV/0!
I 14171083	five_prime_utr	WBGene00077520	C37A5.11	7	2	28.57	0	0	#DIV/0!
I 11560513	exon	WBGene00000642	col-66	0	0	0	20	5	25
I 11670020	exon	WBGene00199697	F11A6.10	5	3	60	0	0	#DIV/0!
I 11670019	exon	WBGene00199697	F11A6.10	5	4	80	0	0	#DIV/0!
I 11670092	exon	WBGene00199697	F11A6.10	5	2	40	0	0	#DIV/0!
I 11670057	exon	WBGene00199697	F11A6.10	6	3	50	0	0	#DIV/0!
I 2446887	exon	WBGene00017731	F23C8.1	7	2	28.57	0	0	#DIV/0!
X 6601559	exon	WBGene00044574	F23G4.1	6	3	50	0	0	#DIV/0!
X 6601368	exon	WBGene00023275	F23G4.t1	5	2	40	0	0	#DIV/0!
X 6601344	exon	WBGene00023275	F23G4.t1	5	4	80	0	0	#DIV/0!
X 6601341	exon	WBGene00023275	F23G4.t1	5	4	80	0	0	#DIV/0!
X 6601340	exon	WBGene00023275	F23G4.t1	5	4	80	0	0	#DIV/0!
II 3319738	exon	WBGene00018194	F39E9.1	14	2	14.29	0	0	#DIV/0!
II 3319744	exon	WBGene00018194	F39E9.1	14	2	14.29	0	0	#DIV/0!
II 3319750	exon	WBGene00018194	F39E9.1	14	2	14.29	0	0	#DIV/0!
II 3320259	exon	WBGene00018194	F39E9.1	16	2	12.5	5	1	20
II 3320274	exon	WBGene00018194	F39E9.1	16	3	18.75	0	0	#DIV/0!
II 3318514	exon	WBGene00018194	F39E9.1	9	2	22.22	0	0	#DIV/0!
II 3318513	exon	WBGene00018194	F39E9.1	9	2	22.22	0	0	#DIV/0!
II 3318503	exon	WBGene00018194	F39E9.1	9	2	22.22	0	0	#DIV/0!
II 3318502	exon	WBGene00018194	F39E9.1	9	2	22.2222	0	0	#DIV/0!
II 3318482	exon	WBGene00018194	F39E9.1	6	2	33.3333	0	0	#DIV/0!
II 3318481	exon	WBGene00018194	F39E9.1	6	2	33.3333	0	0	#DIV/0!
III 1283133	exon	WBGene00013842	fbxa-34	9	2	22.22	0	0	#DIV/0!
III 1282596	exon	WBGene00013842	fbxa-34	22	3	13.64	0	0	#DIV/0!
III 1282583	exon	WBGene00013842	fbxa-34	23	3	13.04	0	0	#DIV/0!
III 1282582	exon	WBGene00013842	fbxa-34	23	3	13.04	0	0	#DIV/0!
III 1282565	exon	WBGene00013842	fbxa-34	21	3	14.29	0	0	#DIV/0!
III 1283141	exon	WBGene00013842	fbxa-34	9	2	22.22	0	0	#DIV/0!
IV 6963132	exon	WBGene00002178	jnk-1	7	3	42.86	0	0	#DIV/0!
II 5711771	exon	WBGene00015942	osta-2	7	4	57.14	0	0	#DIV/0!
X 1011584	exon	WBGene00023069	rncs-1	56	6	10.71	22	2	9.09091
X 1011786	exon	WBGene00023069	rncs-1	38	6	15.79	0	0	#DIV/0!
X 1011787	exon	WBGene00023069	rncs-1	37	5	13.51	0	0	#DIV/0!
X 1011815	exon	WBGene00023069	rncs-1	47	7	14.89	9	3	33.3333
X 1011811	exon	WBGene00023069	rncs-1	46	11	23.91	8	6	75
X 1011804	exon	WBGene00023069	rncs-1	44	13	29.55	7	3	42.8571
X 1011797	exon	WBGene00023069	rncs-1	40	7	17.5	0	0	#DIV/0!
X 1011729	exon	WBGene00023069	rncs-1	49	22	44.9	1	1	100
X 1011724	exon	WBGene00023069	rncs-1	50	14	28	1	1	100
X 1011720	exon	WBGene00023069	rncs-1	50	4	8	0	0	#DIV/0!
X 1011730	exon	WBGene00023069	rncs-1	48	30	62.5	0	0	#DIV/0!
X 1011749	exon	WBGene00023069	rncs-1	44	5	11.36	6	3	50
X 1011753	exon	WBGene00023069	rncs-1	41	24	58.54	1	1	100
X 1011762	exon	WBGene00023069	rncs-1	43	14	32.56	6	3	50
X 1011763	exon	WBGene00023069	rncs-1	42	36	85.71	6	5	83.3333
X 1011716	exon	WBGene00023069	rncs-1	52	10	19.23	1	1	100
X 1012055	exon	WBGene00023069	rncs-1	55	27	49.09	31	10	32.2581
X 1012033	exon	WBGene00023069	rncs-1	56	12	21.43	17	7	41.1765
X 1012046	exon	WBGene00023069	rncs-1	56	47	83.93	28	22	78.5714
X 1012045	exon	WBGene00023069	rncs-1	56	35	62.5	28	14	50
X 1012032	exon	WBGene00023069	rncs-1	57	4	7.02	14	3	21.4286
X 1011988	exon	WBGene00023069	rncs-1	72	11	15.28	13	3	23.0769
X 1012016	exon	WBGene00023069	rncs-1	62	4	6.45	7	1	14.2857
X 1011822	exon	WBGene00023069	rncs-1	47	10	21.28	8	3	37.5
X 1011821	exon	WBGene00023069	rncs-1	47	4	8.51	0	0	#DIV/0!
X 1012023	exon	WBGene00023069	rncs-1	59	5	8.47	13	2	15.3846
X 1011604	exon	WBGene00023069	rncs-1	57	12	21.05	57	8	14.0351
X 1011612	exon	WBGene00023069	rncs-1	54	5	9.26	9	2	22.2222
X 1011611	exon	WBGene00023069	rncs-1	52	24	46.15	40	18	45
X 1011610	exon	WBGene00023069	rncs-1	53	23	43.4	40	18	45
X 1011609	exon	WBGene00023069	rncs-1	54	5	9.26	14	2	14.2857
X 1011585	exon	WBGene00023069	rncs-1	56	30	53.57	68	20	29.4118
X 1011668	exon	WBGene00023069	rncs-1	59	7	11.86	0	0	#DIV/0!
X 1011687	exon	WBGene00023069	rncs-1	55	10	18.18	0	0	#DIV/0!
X 1011686	exon	WBGene00023069	rncs-1	56	19	33.93	0	0	#DIV/0!
X 1011688	exon	WBGene00023069	rncs-1	54	21	38.89	0	0	#DIV/0!
X 1011653	exon	WBGene00023069	rncs-1	62	22	35.48	3	1	33.3333
X 1011615	exon	WBGene00023069	rncs-1	54	12	22.22	17	3	17.6471
X 1011712	exon	WBGene00023069	rncs-1	51	19	37.25	1	1	100
X 1011711	exon	WBGene00023069	rncs-1	51	8	15.69	0	0	#DIV/0!
X 1011691	exon	WBGene00023069	rncs-1	52	28	53.85	2	1	50
X 1011690	exon	WBGene00023069	rncs-1	53	4	7.55	0	0	#DIV/0!
X 1011650	exon	WBGene00023069	rncs-1	61	59	96.72	6	5	83.3333
X 1011640	exon	WBGene00023069	rncs-1	60	4	6.67	4	2	50
X 1011635	exon	WBGene00023069	rncs-1	60	23	38.33	5	3	60
X 1011631	exon	WBGene00023069	rncs-1	60	20	33.33	6	2	33.3333
X 1011630	exon	WBGene00023069	rncs-1	59	5	8.47	4	1	25
X 1011622	exon	WBGene00023069	rncs-1	50	46	92	17	13	76.4706
X 1011621	exon	WBGene00023069	rncs-1	52	19	36.54	18	7	38.8889
X 1012069	exon	WBGene00023069	rncs-1	56	19	33.93	12	3	25
X 1012184	exon	WBGene00023069	rncs-1	44	9	20.45	45	7	15.5556
X 1012191	exon	WBGene00023069	rncs-1	50	13	26	60	14	23.3333
X 1012200	exon	WBGene00023069	rncs-1	61	13	21.31	61	6	9.83607
X 1012179	exon	WBGene00023069	rncs-1	46	14	30.43	38	5	13.1579
X 1012176	exon	WBGene00023069	rncs-1	45	21	46.67	51	25	49.0196
X 1012211	exon	WBGene00023069	rncs-1	64	13	20.31	37	5	13.5135
X 1012205	exon	WBGene00023069	rncs-1	64	13	20.31	75	11	14.6667
X 1012092	exon	WBGene00023069	rncs-1	54	45	83.33	39	23	58.9744
X 1012085	exon	WBGene00023069	rncs-1	56	7	12.5	42	5	11.9048
X 1012163	exon	WBGene00023069	rncs-1	48	34	70.83	55	25	45.4545
X 1012082	exon	WBGene00023069	rncs-1	58	5	8.62	0	0	#DIV/0!
X 1012079	exon	WBGene00023069	rncs-1	58	5	8.62	0	0	#DIV/0!
X 1012146	exon	WBGene00023069	rncs-1	50	15	30	60	13	21.6667
X 1012154	exon	WBGene00023069	rncs-1	49	40	81.63	63	40	63.4921
X 1012159	exon	WBGene00023069	rncs-1	49	4	8.16	41	5	12.1951
X 1012162	exon	WBGene00023069	rncs-1	48	28	58.33	51	19	37.2549
X 1012068	exon	WBGene00023069	rncs-1	57	3	5.26	33	4	12.1212
V 9707265	three_prime_utr	WBGene00009580	xbx-6	6	2	33.33	0	0	#DIV/0!
V 9707264	three_prime_utr	WBGene00009580	xbx-6	6	4	66.67	0	0	#DIV/0!
II 13418915	exon	WBGene00013014	Y48E1C.1	7	5	71.43	0	0	#DIV/0!
X 85144	exon	WBGene00022205	Y73B3A.3	5	4	80	0	0	#DIV/0!
X 85161	exon	WBGene00022205	Y73B3A.3	6	4	66.67	0	0	#DIV/0!
X 85181	exon	WBGene00022205	Y73B3A.3	7	5	71.43	0	0	#DIV/0!
X 85148	exon	WBGene00022205	Y73B3A.3	5	4	80	0	0	#DIV/0!
X 85145	exon	WBGene00022205	Y73B3A.3	5	4	80	0	0	#DIV/0!
X 85208	exon	WBGene00022205	Y73B3A.3	6	3	50	0	0	#DIV/0!
X 85212	exon	WBGene00022205	Y73B3A.3	6	3	50	0	0	#DIV/0!
X 85206	exon	WBGene00022205	Y73B3A.3	6	3	50	0	0	#DIV/0!
III 7602023	exon	WBGene00206459	Y80D4G.1	13	2	15.38	0	0	#DIV/0!
III 7602015	exon	WBGene00206459	Y80D4G.1	14	3	21.43	0	0	#DIV/0!
III 7602024	exon	WBGene00206459	Y80D4G.1	13	2	15.38	0	0	#DIV/0!
I 14855738	five_prime_utr	WBGene00000088	aex-5	188	10	5.32	0	0	#DIV/0!
I 14855737	five_prime_utr	WBGene00000088	aex-5	189	11	5.82	0	0	#DIV/0!
I 14855736	five_prime_utr	WBGene00000088	aex-5	190	7	3.68	0	0	#DIV/0!
I 14855742	five_prime_utr	WBGene00000088	aex-5	180	20	11.11	0	0	#DIV/0!
I 14855743	five_prime_utr	WBGene00000088	aex-5	180	12	6.67	0	0	#DIV/0!
I 14855776	five_prime_utr	WBGene00000088	aex-5	176	4	2.27	0	0	#DIV/0!
I 14855775	five_prime_utr	WBGene00000088	aex-5	179	4	2.23	0	0	#DIV/0!
I 14855754	five_prime_utr	WBGene00000088	aex-5	179	4	2.23	0	0	#DIV/0!
I 14855747	five_prime_utr	WBGene00000088	aex-5	181	14	7.73	24	2	8.33333
I 14855746	five_prime_utr	WBGene00000088	aex-5	180	13	7.22	0	0	#DIV/0!
I 14855818	five_prime_utr	WBGene00000088	aex-5	167	3	1.8	0	0	#DIV/0!
I 14855795	five_prime_utr	WBGene00000088	aex-5	174	17	9.77	0	0	#DIV/0!
I 14855793	five_prime_utr	WBGene00000088	aex-5	176	6	3.41	0	0	#DIV/0!
I 14855790	five_prime_utr	WBGene00000088	aex-5	176	4	2.27	0	0	#DIV/0!
I 14855784	five_prime_utr	WBGene00000088	aex-5	172	6	3.49	0	0	#DIV/0!
I 14855778	five_prime_utr	WBGene00000088	aex-5	172	7	4.07	0	0	#DIV/0!
I 14855794	five_prime_utr	WBGene00000088	aex-5	175	9	5.14	0	0	#DIV/0!
V 17870645	five_prime_utr	WBGene00000813	csn-1	17	2	11.76	36	3	8.33333
IV 203515	five_prime_utr	WBGene00044736	gfrp-1	9	3	33.33	0	0	#DIV/0!
V 5581406	five_prime_utr	WBGene00002215	klc-2	7	6	85.71	0	0	#DIV/0!
V 4219653	five_prime_utr	WBGene00003747	nlp-9	31	3	9.68	49	5	10.2041
I 12809636	five_prime_utr	WBGene00012475	Y18D10A.2	13	4	30.77	0	0	#DIV/0!
I 12809635	five_prime_utr	WBGene00012475	Y18D10A.2	13	3	23.08	1	1	100
I 12809600	five_prime_utr	WBGene00012475	Y18D10A.2	10	3	30	0	0	#DIV/0!
I 12809603	five_prime_utr	WBGene00012475	Y18D10A.2	10	5	50	1	1	100
I 12809615	five_prime_utr	WBGene00012475	Y18D10A.2	11	3	27.27	0	0	#DIV/0!
I 12809616	five_prime_utr	WBGene00012475	Y18D10A.2	11	9	81.82	1	1	100
I 12809653	five_prime_utr	WBGene00012475	Y18D10A.2	13	6	46.15	1	1	100
I 12809651	five_prime_utr	WBGene00012475	Y18D10A.2	13	9	69.23	0	0	#DIV/0!
I 12809652	five_prime_utr	WBGene00012475	Y18D10A.2	13	5	38.46	1	1	100
I 12809667	five_prime_utr	WBGene00012475	Y18D10A.2	13	4	30.77	0	0	#DIV/0!
I 12809645	five_prime_utr	WBGene00012475	Y18D10A.2	13	3	23.08	0	0	#DIV/0!
I 12809646	five_prime_utr	WBGene00012475	Y18D10A.2	13	4	30.77	0	0	#DIV/0!
II 14346359	five_prime_utr	WBGene00013218	Y54G11A.9	12	4	33.33	0	0	#DIV/0!
II 14346329	five_prime_utr	WBGene00013218	Y54G11A.9	9	4	44.44	0	0	#DIV/0!
I 1376417	intergenic	intergenic	N/A	6	4	66.67	1	1	100
I 1376418	intergenic	intergenic	N/A	6	4	66.67	1	1	100
I 1376428	intergenic	intergenic	N/A	6	4	66.67	1	1	100
I 1376465	intergenic	intergenic	N/A	5	2	40	0	0	#DIV/0!
I 1376466	intergenic	intergenic	N/A	5	2	40	1	1	100
I 1376486	intergenic	intergenic	N/A	5	2	40	0	0	#DIV/0!
I 1376506	intergenic	intergenic	N/A	5	3	60	0	0	#DIV/0!
I 1376532	intergenic	intergenic	N/A	5	3	60	1	1	100
I 1491547	intergenic	intergenic	N/A	12	3	25	0	0	#DIV/0!
I 1491571	intergenic	intergenic	N/A	10	2	20	0	0	#DIV/0!
I 1491574	intergenic	intergenic	N/A	10	5	50	0	0	#DIV/0!
I 1491575	intergenic	intergenic	N/A	10	6	60	0	0	#DIV/0!
I 1491580	intergenic	intergenic	N/A	9	6	66.6667	0	0	#DIV/0!
I 1491581	intergenic	intergenic	N/A	9	8	88.89	0	0	#DIV/0!
I 1491582	intergenic	intergenic	N/A	9	4	44.44	0	0	#DIV/0!
I 1491583	intergenic	intergenic	N/A	9	2	22.22	0	0	#DIV/0!
I 1491591	intergenic	intergenic	N/A	8	5	62.5	0	0	#DIV/0!
I 1491593	intergenic	intergenic	N/A	8	2	25	0	0	#DIV/0!
I 1491594	intergenic	intergenic	N/A	8	4	50	0	0	#DIV/0!
I 1491601	intergenic	intergenic	N/A	6	2	33.33	0	0	#DIV/0!
I 1491609	intergenic	intergenic	N/A	5	4	80	0	0	#DIV/0!
I 1491623	intergenic	intergenic	N/A	5	2	40	0	0	#DIV/0!
I 1492616	intergenic	intergenic	N/A	10	2	20	0	0	#DIV/0!
I 1492666	intergenic	intergenic	N/A	6	2	33.33	0	0	#DIV/0!
I 1492691	intergenic	intergenic	N/A	6	3	50	0	0	#DIV/0!
I 1492706	intergenic	intergenic	N/A	5	3	60	0	0	#DIV/0!
I 1492708	intergenic	intergenic	N/A	5	4	80	0	0	#DIV/0!
I 1493723	intergenic	intergenic	N/A	14	11	78.57	0	0	#DIV/0!
I 1493745	intergenic	intergenic	N/A	14	11	78.57	0	0	#DIV/0!
I 1493746	intergenic	intergenic	N/A	14	11	78.57	0	0	#DIV/0!
I 1493752	intergenic	intergenic	N/A	14	5	35.71	0	0	#DIV/0!
I 1493763	intergenic	intergenic	N/A	14	5	35.71	0	0	#DIV/0!
I 1493826	intergenic	intergenic	N/A	10	4	40	0	0	#DIV/0!
I 1493827	intergenic	intergenic	N/A	9	7	77.78	0	0	#DIV/0!
I 1493838	intergenic	intergenic	N/A	8	5	62.5	0	0	#DIV/0!
I 1493839	intergenic	intergenic	N/A	8	7	87.5	0	0	#DIV/0!
I 1493840	intergenic	intergenic	N/A	8	2	25	0	0	#DIV/0!
I 1493862	intergenic	intergenic	N/A	7	3	42.86	0	0	#DIV/0!
I 1493863	intergenic	intergenic	N/A	7	5	71.43	0	0	#DIV/0!
I 1493864	intergenic	intergenic	N/A	7	3	42.86	0	0	#DIV/0!
I 1493868	intergenic	intergenic	N/A	7	4	57.14	0	0	#DIV/0!
I 1493892	intergenic	intergenic	N/A	7	2	28.57	0	0	#DIV/0!
I 1494268	intergenic	intergenic	N/A	6	3	50	0	0	#DIV/0!
I 1494292	intergenic	intergenic	N/A	5	3	60	0	0	#DIV/0!
I 1494301	intergenic	intergenic	N/A	6	2	33.33	0	0	#DIV/0!
I 1494302	intergenic	intergenic	N/A	6	2	33.33	0	0	#DIV/0!
I 1494312	intergenic	intergenic	N/A	6	2	33.33	0	0	#DIV/0!
I 1494325	intergenic	intergenic	N/A	6	4	66.67	0	0	#DIV/0!
I 1494326	intergenic	intergenic	N/A	6	4	66.67	0	0	#DIV/0!
I 1494436	intergenic	intergenic	N/A	11	3	27.27	0	0	#DIV/0!
I 1871571	intergenic	intergenic	N/A	7	4	57.14	0	0	#DIV/0!
I 1871580	intergenic	intergenic	N/A	8	4	50	0	0	#DIV/0!
I 1871592	intergenic	intergenic	N/A	9	6	66.67	0	0	#DIV/0!
I 1871615	intergenic	intergenic	N/A	10	2	20	0	0	#DIV/0!
I 1871619	intergenic	intergenic	N/A	10	7	70	0	0	#DIV/0!
I 1871620	intergenic	intergenic	N/A	11	2	18.18	0	0	#DIV/0!
I 1871624	intergenic	intergenic	N/A	11	3	27.27	0	0	#DIV/0!
I 1871628	intergenic	intergenic	N/A	11	2	18.18	0	0	#DIV/0!
I 1871639	intergenic	intergenic	N/A	11	2	18.18	0	0	#DIV/0!
I 2034037	three_prime_utr	WBGene00021237	crtc-1	29	4	13.79	0	0	#DIV/0!
I 2034042	three_prime_utr	WBGene00021237	crtc-1	30	25	83.33	9	9	100
I 2034084	three_prime_utr	WBGene00021237	crtc-1	36	3	8.33	0	0	#DIV/0!
I 2034085	three_prime_utr	WBGene00021237	crtc-1	35	18	51.43	11	6	54.5455
I 2034869	intergenic	intergenic	N/A	12	2	16.67	0	0	#DIV/0!
I 2034870	intergenic	intergenic	N/A	12	2	16.67	0	0	#DIV/0!
I 2034955	intergenic	intergenic	N/A	11	2	18.18	0	0	#DIV/0!
I 2034960	intergenic	intergenic	N/A	12	3	25	0	0	#DIV/0!
I 2034962	intergenic	intergenic	N/A	12	4	33.33	0	0	#DIV/0!
I 2034963	intergenic	intergenic	N/A	12	3	25	0	0	#DIV/0!
I 2034981	intergenic	intergenic	N/A	14	2	14.29	0	0	#DIV/0!
I 2034991	intergenic	intergenic	N/A	14	7	50	0	0	#DIV/0!
I 2035021	intergenic	intergenic	N/A	14	4	28.57	0	0	#DIV/0!
I 2035040	intergenic	intergenic	N/A	14	7	50	0	0	#DIV/0!
I 2035041	intergenic	intergenic	N/A	13	3	23.08	0	0	#DIV/0!
I 2035082	intergenic	intergenic	N/A	9	3	33.33	0	0	#DIV/0!
I 2035113	intergenic	intergenic	N/A	9	2	22.22	0	0	#DIV/0!
I 3255683	three_prime_utr	WBGene00003258	cogc-1	12	3	25	10	2	20
I 5149489	intergenic	intergenic	N/A	19	9	47.37	0	0	#DIV/0!
I 5149501	intergenic	intergenic	N/A	18	4	22.22	0	0	#DIV/0!
I 5149507	intergenic	intergenic	N/A	20	3	15	0	0	#DIV/0!
I 5149543	intergenic	intergenic	N/A	25	5	20	0	0	#DIV/0!
I 5149544	intergenic	intergenic	N/A	24	12	50	0	0	#DIV/0!
I 5149549	intergenic	intergenic	N/A	24	9	37.5	0	0	#DIV/0!
I 5149557	intergenic	intergenic	N/A	22	3	13.64	0	0	#DIV/0!
I 5149563	intergenic	intergenic	N/A	20	8	40	0	0	#DIV/0!
I 5149564	intergenic	intergenic	N/A	20	10	50	0	0	#DIV/0!
I 5149567	intergenic	intergenic	N/A	20	7	35	0	0	#DIV/0!
I 5149572	intergenic	intergenic	N/A	20	3	15	0	0	#DIV/0!
I 5149577	intergenic	intergenic	N/A	20	19	95	1	1	100
I 5149608	intergenic	intergenic	N/A	16	11	68.75	1	1	100
I 5149613	intergenic	intergenic	N/A	17	6	35.29	1	1	100
I 5149620	intergenic	intergenic	N/A	15	9	60	0	0	#DIV/0!
I 5149621	intergenic	intergenic	N/A	15	7	46.67	1	1	100
I 5149622	intergenic	intergenic	N/A	15	5	33.33	0	0	#DIV/0!
I 5149649	intergenic	intergenic	N/A	13	4	30.77	1	1	100
I 5149668	intergenic	intergenic	N/A	12	5	41.67	2	2	100
I 5149669	intergenic	intergenic	N/A	12	4	33.33	1	1	100
I 5149751	intergenic	intergenic	N/A	6	2	33.33	0	0	#DIV/0!
I 5149755	intergenic	intergenic	N/A	6	2	33.33	0	0	#DIV/0!
I 5149756	intergenic	intergenic	N/A	6	5	83.33	0	0	#DIV/0!
I 5149757	intergenic	intergenic	N/A	6	3	50	0	0	#DIV/0!
I 5149762	intergenic	intergenic	N/A	6	2	33.33	0	0	#DIV/0!
I 5149778	intergenic	intergenic	N/A	9	3	33.33	1	1	100
I 5149784	intergenic	intergenic	N/A	10	2	20	0	0	#DIV/0!
I 5149800	intergenic	intergenic	N/A	13	2	15.38	0	0	#DIV/0!
I 5149802	intergenic	intergenic	N/A	12	4	33.33	0	0	#DIV/0!
I 5149803	intergenic	intergenic	N/A	12	10	83.33	1	1	100
I 5149813	intergenic	intergenic	N/A	15	4	26.67	0	0	#DIV/0!
I 5149814	intergenic	intergenic	N/A	15	6	40	0	0	#DIV/0!
I 5149815	intergenic	intergenic	N/A	15	5	33.33	0	0	#DIV/0!
I 5149816	intergenic	intergenic	N/A	15	8	53.33	0	0	#DIV/0!
I 5149823	intergenic	intergenic	N/A	17	4	23.53	1	1	100
I 5149834	intergenic	intergenic	N/A	19	4	21.05	0	0	#DIV/0!
I 5149843	intergenic	intergenic	N/A	16	12	75	1	1	100
I 5149844	intergenic	intergenic	N/A	16	14	87.5	1	1	100
I 5149849	intergenic	intergenic	N/A	17	10	58.82	1	1	100
I 5149879	intergenic	intergenic	N/A	20	7	35	2	2	100
I 5149881	intergenic	intergenic	N/A	20	9	45	0	0	#DIV/0!
I 5314116	intergenic	intergenic	N/A	16	2	12.5	0	0	#DIV/0!
I 7177251	intron	WBGene00010873	trpa-2	7	2	28.57	0	0	#DIV/0!
I 8357899	three_prime_utr	WBGene00006531	tba-5	59	6	10.17	0	0	#DIV/0!
I 8357900	three_prime_utr	WBGene00006531	tba-5	58	4	6.9	0	0	#DIV/0!
I 10140948	intergenic	intergenic	N/A	5	2	40	0	0	#DIV/0!
I 10819971	three_prime_utr	WBGene00016458	C35E7.6	94	11	11.7	48	8	16.6667
I 10819994	three_prime_utr	WBGene00016458	C35E7.6	75	11	14.67	61	13	21.3115
I 10819998	three_prime_utr	WBGene00016458	C35E7.6	73	27	36.99	61	29	47.541
I 10820008	three_prime_utr	WBGene00016458	C35E7.6	66	28	42.42	58	43	74.1379
I 10820009	three_prime_utr	WBGene00016458	C35E7.6	64	39	60.94	58	49	84.4828
I 10820012	three_prime_utr	WBGene00016458	C35E7.6	64	6	9.38	59	13	22.0339
I 10820016	three_prime_utr	WBGene00016458	C35E7.6	65	7	10.77	47	14	29.7872
I 10820035	three_prime_utr	WBGene00016458	C35E7.6	48	11	22.92	42	17	40.4762
I 10820036	three_prime_utr	WBGene00016458	C35E7.6	48	21	43.75	42	30	71.4286
I 10820037	three_prime_utr	WBGene00016458	C35E7.6	48	3	6.25	13	2	15.3846
I 10820043	three_prime_utr	WBGene00016458	C35E7.6	42	5	11.9	26	3	11.5385
I 10820050	three_prime_utr	WBGene00016458	C35E7.6	39	5	12.82	32	11	34.375
I 10820051	three_prime_utr	WBGene00016458	C35E7.6	38	8	21.05	25	6	24
I 10820052	three_prime_utr	WBGene00016458	C35E7.6	37	3	8.11	15	3	20
I 10820077	three_prime_utr	WBGene00016458	C35E7.6	34	4	11.76	5	1	20
I 10820086	three_prime_utr	WBGene00016458	C35E7.6	36	17	47.22	18	12	66.6667
I 10820093	three_prime_utr	WBGene00016458	C35E7.6	42	4	9.52	23	10	43.4783
I 10820094	three_prime_utr	WBGene00016458	C35E7.6	45	3	6.67	9	2	22.2222
I 10820098	three_prime_utr	WBGene00016458	C35E7.6	47	3	6.38	4	1	25
I 10820100	three_prime_utr	WBGene00016458	C35E7.6	48	6	12.5	4	1	25
I 10820113	three_prime_utr	WBGene00016458	C35E7.6	59	8	13.56	28	8	28.5714
I 10820114	three_prime_utr	WBGene00016458	C35E7.6	60	14	23.33	29	10	34.4828
I 10820128	three_prime_utr	WBGene00016458	C35E7.6	68	5	7.35	29	7	24.1379
I 10820137	three_prime_utr	WBGene00016458	C35E7.6	68	49	72.06	39	31	79.4872
I 10820138	three_prime_utr	WBGene00016458	C35E7.6	68	54	79.41	38	32	84.2105
I 10820143	three_prime_utr	WBGene00016458	C35E7.6	69	17	24.64	41	15	36.5854
I 10820149	three_prime_utr	WBGene00016458	C35E7.6	72	4	5.56	31	5	16.129
I 10820151	three_prime_utr	WBGene00016458	C35E7.6	74	4	5.41	20	3	15
I 10820152	three_prime_utr	WBGene00016458	C35E7.6	74	10	13.51	37	11	29.7297
I 10820169	three_prime_utr	WBGene00016458	C35E7.6	89	11	12.36	37	14	37.8378
I 10820175	three_prime_utr	WBGene00016458	C35E7.6	89	15	16.85	41	10	24.3902
I 10820181	three_prime_utr	WBGene00016458	C35E7.6	88	46	52.27	43	22	51.1628
I 10820182	three_prime_utr	WBGene00016458	C35E7.6	88	24	27.27	44	22	50
I 10820188	three_prime_utr	WBGene00016458	C35E7.6	90	8	8.89	52	9	17.3077
I 10820189	three_prime_utr	WBGene00016458	C35E7.6	89	21	23.6	47	16	34.0426
I 10820191	three_prime_utr	WBGene00016458	C35E7.6	88	21	23.86	43	10	23.2558
I 10820192	three_prime_utr	WBGene00016458	C35E7.6	87	17	19.54	57	21	36.8421
I 10820197	three_prime_utr	WBGene00016458	C35E7.6	97	10	10.31	30	4	13.3333
I 10820202	three_prime_utr	WBGene00016458	C35E7.6	98	5	5.1	0	0	#DIV/0!
I 10820208	three_prime_utr	WBGene00016458	C35E7.6	98	35	35.71	48	24	50
I 10820209	three_prime_utr	WBGene00016458	C35E7.6	98	8	8.16	48	12	25
I 10820210	three_prime_utr	WBGene00016458	C35E7.6	98	7	7.14	27	6	22.2222
I 10820214	three_prime_utr	WBGene00016458	C35E7.6	98	8	8.16	21	2	9.52381
I 10820215	three_prime_utr	WBGene00016458	C35E7.6	96	65	67.71	45	36	80
I 10820229	three_prime_utr	WBGene00016458	C35E7.6	99	51	51.52	45	24	53.3333
I 10820251	three_prime_utr	WBGene00016458	C35E7.6	94	37	39.36	32	23	71.875
I 10820252	three_prime_utr	WBGene00016458	C35E7.6	94	18	19.15	30	13	43.3333
I 10820253	three_prime_utr	WBGene00016458	C35E7.6	92	9	9.78	16	3	18.75
I 10820257	three_prime_utr	WBGene00016458	C35E7.6	89	5	5.62	25	7	28
I 10820261	three_prime_utr	WBGene00016458	C35E7.6	84	24	28.57	27	17	62.963
I 10820262	three_prime_utr	WBGene00016458	C35E7.6	84	4	4.76	10	3	30
I 10820264	three_prime_utr	WBGene00016458	C35E7.6	83	12	14.46	26	11	42.3077
I 10820265	three_prime_utr	WBGene00016458	C35E7.6	85	4	4.71	0	0	#DIV/0!
I 10820274	three_prime_utr	WBGene00016458	C35E7.6	92	9	9.78	6	2	33.3333
I 10820275	three_prime_utr	WBGene00016458	C35E7.6	91	6	6.59	6	2	33.3333
I 10820286	three_prime_utr	WBGene00016458	C35E7.6	96	20	20.83	5	1	20
I 10820287	three_prime_utr	WBGene00016458	C35E7.6	97	30	30.93	8	3	37.5
I 10820292	three_prime_utr	WBGene00016458	C35E7.6	97	48	49.48	11	6	54.5455
I 10820306	three_prime_utr	WBGene00016458	C35E7.6	94	12	12.77	3	1	33.3333
I 10820312	three_prime_utr	WBGene00016458	C35E7.6	90	24	26.67	7	3	42.8571
I 10820313	three_prime_utr	WBGene00016458	C35E7.6	89	46	51.69	7	6	85.7143
I 10820314	three_prime_utr	WBGene00016458	C35E7.6	88	60	68.18	8	7	87.5
I 10820315	three_prime_utr	WBGene00016458	C35E7.6	88	55	62.5	10	7	70
I 10820327	three_prime_utr	WBGene00016458	C35E7.6	92	35	38.04	9	4	44.4444
I 10820333	three_prime_utr	WBGene00016458	C35E7.6	97	8	8.25	8	2	25
I 10820334	three_prime_utr	WBGene00016458	C35E7.6	97	5	5.15	1	1	100
I 10820342	three_prime_utr	WBGene00016458	C35E7.6	93	7	7.53	0	0	#DIV/0!
I 10820344	three_prime_utr	WBGene00016458	C35E7.6	93	6	6.45	7	2	28.5714
I 10820349	three_prime_utr	WBGene00016458	C35E7.6	88	41	46.59	7	4	57.1429
I 10820350	three_prime_utr	WBGene00016458	C35E7.6	88	69	78.41	7	5	71.4286
I 10820359	three_prime_utr	WBGene00016458	C35E7.6	91	28	30.77	3	2	66.6667
I 10820361	three_prime_utr	WBGene00016458	C35E7.6	89	33	37.08	8	2	25
I 10820364	three_prime_utr	WBGene00016458	C35E7.6	90	11	12.22	15	6	40
I 10820368	three_prime_utr	WBGene00016458	C35E7.6	90	9	10	8	2	25
I 10820377	three_prime_utr	WBGene00016458	C35E7.6	90	8	8.89	23	6	26.087
I 10820378	three_prime_utr	WBGene00016458	C35E7.6	91	14	15.38	23	8	34.7826
I 10820385	three_prime_utr	WBGene00016458	C35E7.6	94	5	5.32	16	5	31.25
I 10820386	three_prime_utr	WBGene00016458	C35E7.6	92	4	4.35	0	0	#DIV/0!
I 10820387	three_prime_utr	WBGene00016458	C35E7.6	91	7	7.69	18	6	33.3333
I 10820389	three_prime_utr	WBGene00016458	C35E7.6	91	11	12.09	19	4	21.0526
I 10820404	three_prime_utr	WBGene00016458	C35E7.6	94	5	5.32	23	3	13.0435
I 10820406	three_prime_utr	WBGene00016458	C35E7.6	92	10	10.87	39	9	23.0769
I 10820412	three_prime_utr	WBGene00016458	C35E7.6	94	25	26.6	43	20	46.5116
I 10820413	three_prime_utr	WBGene00016458	C35E7.6	93	12	12.9	43	16	37.2093
I 10820416	three_prime_utr	WBGene00016458	C35E7.6	92	4	4.35	12	1	8.33333
I 10820418	three_prime_utr	WBGene00016458	C35E7.6	90	59	65.56	47	39	82.9787
I 10820419	three_prime_utr	WBGene00016458	C35E7.6	89	53	59.55	47	33	70.2128
I 10820427	three_prime_utr	WBGene00016458	C35E7.6	92	9	9.78	35	7	20
I 10820428	three_prime_utr	WBGene00016458	C35E7.6	92	42	45.65	49	31	63.2653
I 10820429	three_prime_utr	WBGene00016458	C35E7.6	92	16	17.39	46	12	26.087
I 10820436	three_prime_utr	WBGene00016458	C35E7.6	94	5	5.32	7	1	14.2857
I 10820442	three_prime_utr	WBGene00016458	C35E7.6	93	4	4.3	32	4	12.5
I 10820453	three_prime_utr	WBGene00016458	C35E7.6	95	11	11.58	23	2	8.69565
I 10820455	three_prime_utr	WBGene00016458	C35E7.6	97	4	4.12	48	11	22.9167
I 10820461	three_prime_utr	WBGene00016458	C35E7.6	99	4	4.04	43	5	11.6279
I 10820462	three_prime_utr	WBGene00016458	C35E7.6	99	11	11.11	32	7	21.875
I 10820473	three_prime_utr	WBGene00016458	C35E7.6	103	8	7.77	30	5	16.6667
I 10820475	three_prime_utr	WBGene00016458	C35E7.6	99	32	32.32	50	31	62
I 10820476	three_prime_utr	WBGene00016458	C35E7.6	97	56	57.73	50	45	90
I 10820477	three_prime_utr	WBGene00016458	C35E7.6	100	4	4	23	3	13.0435
I 10820478	three_prime_utr	WBGene00016458	C35E7.6	101	8	7.92	56	14	25
I 10820486	three_prime_utr	WBGene00016458	C35E7.6	102	50	49.02	57	46	80.7018
I 10820499	three_prime_utr	WBGene00016458	C35E7.6	105	22	20.95	57	23	40.3509
I 10820508	three_prime_utr	WBGene00016458	C35E7.6	102	24	23.53	60	20	33.3333
I 10820510	three_prime_utr	WBGene00016458	C35E7.6	102	7	6.86	28	5	17.8571
I 10820518	three_prime_utr	WBGene00016458	C35E7.6	109	5	4.59	14	1	7.14286
I 10820519	three_prime_utr	WBGene00016458	C35E7.6	107	4	3.74	33	3	9.09091
I 10820533	three_prime_utr	WBGene00016458	C35E7.6	119	4	3.36	38	2	5.26316
I 10820874	intergenic	intergenic	N/A	87	3	3.45	0	0	#DIV/0!
I 10820941	intergenic	intergenic	N/A	81	3	3.7	0	0	#DIV/0!
I 10820946	intergenic	intergenic	N/A	79	3	3.8	0	0	#DIV/0!
I 10820947	intergenic	intergenic	N/A	79	4	5.06	0	0	#DIV/0!
I 11603055	intergenic	intergenic	N/A	45	10	22.22	0	0	#DIV/0!
I 11603056	intergenic	intergenic	N/A	46	15	32.61	0	0	#DIV/0!
I 11603120	intergenic	intergenic	N/A	60	4	6.67	1	1	100
I 11603142	intergenic	intergenic	N/A	59	4	6.78	0	0	#DIV/0!
I 11603159	intergenic	intergenic	N/A	55	50	90.91	1	1	100
I 11603311	intergenic	intergenic	N/A	78	14	17.95	0	0	#DIV/0!
I 11603314	intergenic	intergenic	N/A	78	4	5.12821	0	0	#DIV/0!
I 11603341	intergenic	intergenic	N/A	62	10	16.13	0	0	#DIV/0!
I 11603343	intergenic	intergenic	N/A	61	22	36.07	0	0	#DIV/0!
I 11603348	intergenic	intergenic	N/A	59	15	25.42	0	0	#DIV/0!
I 11603349	intergenic	intergenic	N/A	59	7	11.86	0	0	#DIV/0!
I 11603444	intergenic	intergenic	N/A	45	38	84.44	0	0	#DIV/0!
I 11603454	intergenic	intergenic	N/A	50	7	14	0	0	#DIV/0!
I 11603481	intergenic	intergenic	N/A	60	8	13.33	0	0	#DIV/0!
I 11603649	intergenic	intergenic	N/A	41	3	7.32	0	0	#DIV/0!
I 11603650	intergenic	intergenic	N/A	42	3	7.14	0	0	#DIV/0!
I 11603754	intergenic	intergenic	N/A	52	6	11.54	2	1	50
I 11603773	intergenic	intergenic	N/A	57	5	8.77	5	1	20
I 13413467	intergenic	intergenic	N/A	6	3	50	0	0	#DIV/0!
I 13771837	three_prime_utr	WBGene00012389	Y6B3B.4	29	5	17.24	2	1	50
I 13771870	three_prime_utr	WBGene00012389	Y6B3B.4	20	4	20	0	0	#DIV/0!
I 13771959	three_prime_utr	WBGene00012389	Y6B3B.4	9	3	33.33	0	0	#DIV/0!
I 13771981	three_prime_utr	WBGene00012389	Y6B3B.4	7	4	57.14	0	0	#DIV/0!
I 14171478	five_prime_utr	WBGene00077520	C37A5.11	5	2	40	0	0	#DIV/0!
I 14171499	five_prime_utr	WBGene00077520	C37A5.11	6	2	33.33	0	0	#DIV/0!
I 14171503	five_prime_utr	WBGene00077520	C37A5.11	6	5	83.33	0	0	#DIV/0!
I 14855563	intergenic	intergenic	N/A	154	5	3.25	0	0	#DIV/0!
I 14952989	intergenic	intergenic	N/A	6	2	33.33	0	0	#DIV/0!
II 2535079	intergenic	intergenic	N/A	5	2	40	0	0	#DIV/0!
II 2535080	intergenic	intergenic	N/A	5	3	60	0	0	#DIV/0!
II 3125077	intergenic	intergenic	N/A	8	2	25	4	4	100
II 3211189	five_prime_utr	WBGene00022568	ZC239.5	15	2	13.33	9	5	55.5556
II 3211190	five_prime_utr	WBGene00022568	ZC239.5	16	2	12.5	2	1	50
II 3211202	five_prime_utr	WBGene00022568	ZC239.5	21	5	23.81	7	3	42.8571
II 5319270	three_prime_utr	WBGene00001538	gcy-12	22	3	13.64	0	0	#DIV/0!
II 5319299	three_prime_utr	WBGene00001538	gcy-12	32	3	9.38	0	0	#DIV/0!
II 5724815	intergenic	intergenic	N/A	138	5	3.62	38	1	2.63158
II 5724816	intergenic	intergenic	N/A	140	5	3.57	0	0	#DIV/0!
II 5724824	intergenic	intergenic	N/A	147	6	4.08	0	0	#DIV/0!
II 5724849	intergenic	intergenic	N/A	165	8	4.85	54	3	5.55556
II 5724858	intergenic	intergenic	N/A	170	6	3.53	25	1	4
II 5724871	intergenic	intergenic	N/A	172	7	4.07	23	2	8.69565
II 5724885	intergenic	intergenic	N/A	172	5	2.91	69	5	7.24638
II 5724886	intergenic	intergenic	N/A	173	8	4.62	69	5	7.24638
II 5724890	intergenic	intergenic	N/A	173	5	2.89	17	2	11.7647
II 5724906	intergenic	intergenic	N/A	180	8	4.44	12	1	8.33333
II 5724911	intergenic	intergenic	N/A	182	9	4.95	0	0	#DIV/0!
II 5724918	intergenic	intergenic	N/A	188	7	3.72	0	0	#DIV/0!
II 5724928	intergenic	intergenic	N/A	194	8	4.12	29	3	10.3448
II 5724947	intergenic	intergenic	N/A	202	14	6.93	28	2	7.14286
II 5724956	intergenic	intergenic	N/A	205	8	3.9	0	0	#DIV/0!
II 5724973	intergenic	intergenic	N/A	206	12	5.83	0	0	#DIV/0!
II 5724978	intergenic	intergenic	N/A	206	7	3.4	0	0	#DIV/0!
II 5724979	intergenic	intergenic	N/A	206	5	2.43	0	0	#DIV/0!
II 5724982	intergenic	intergenic	N/A	207	7	3.38	0	0	#DIV/0!
II 5724997	intergenic	intergenic	N/A	212	6	2.83	0	0	#DIV/0!
II 5725001	intergenic	intergenic	N/A	216	13	6.02	0	0	#DIV/0!
II 5725005	intergenic	intergenic	N/A	217	5	2.3	0	0	#DIV/0!
II 5725012	intergenic	intergenic	N/A	214	12	5.61	0	0	#DIV/0!
II 5725024	intergenic	intergenic	N/A	220	15	6.82	0	0	#DIV/0!
II 5725032	intergenic	intergenic	N/A	218	11	5.05	0	0	#DIV/0!
II 5725037	intergenic	intergenic	N/A	221	5	2.26	29	1	3.44828
II 5725044	intergenic	intergenic	N/A	219	12	5.48	28	1	3.57143
II 5725056	intergenic	intergenic	N/A	211	23	10.9	0	0	#DIV/0!
II 5725057	intergenic	intergenic	N/A	211	19	9	0	0	#DIV/0!
II 5725058	intergenic	intergenic	N/A	213	5	2.35	0	0	#DIV/0!
II 5725078	intergenic	intergenic	N/A	207	7	3.38	0	0	#DIV/0!
II 5725088	intergenic	intergenic	N/A	206	15	7.28	35	1	2.85714
II 5725112	intergenic	intergenic	N/A	199	5	2.51	0	0	#DIV/0!
II 5725113	intergenic	intergenic	N/A	198	6	3.03	0	0	#DIV/0!
II 5725116	intergenic	intergenic	N/A	197	6	3.05	0	0	#DIV/0!
II 5725126	intergenic	intergenic	N/A	200	5	2.5	0	0	#DIV/0!
II 5725139	intergenic	intergenic	N/A	203	5	2.46	40	1	2.5
II 5725217	intergenic	intergenic	N/A	190	5	2.63	78	3	3.84615
II 5725240	intergenic	intergenic	N/A	183	4	2.19	20	1	5
II 5725241	intergenic	intergenic	N/A	182	5	2.75	65	2	3.07692
II 5725244	intergenic	intergenic	N/A	180	5	2.78	65	2	3.07692
II 5725287	intergenic	intergenic	N/A	188	5	2.66	0	0	#DIV/0!
II 5725354	intergenic	intergenic	N/A	207	8	3.86	0	0	#DIV/0!
II 5725393	intergenic	intergenic	N/A	192	7	3.65	0	0	#DIV/0!
II 5725396	intergenic	intergenic	N/A	191	5	2.62	0	0	#DIV/0!
II 5725404	intergenic	intergenic	N/A	188	7	3.72	0	0	#DIV/0!
II 5725405	intergenic	intergenic	N/A	188	9	4.79	0	0	#DIV/0!
II 5725406	intergenic	intergenic	N/A	187	8	4.28	0	0	#DIV/0!
II 5725429	intergenic	intergenic	N/A	174	9	5.17	0	0	#DIV/0!
II 5725442	intergenic	intergenic	N/A	166	9	5.42	0	0	#DIV/0!
II 5725449	intergenic	intergenic	N/A	160	4	2.5	0	0	#DIV/0!
II 5725462	intergenic	intergenic	N/A	147	4	2.72	0	0	#DIV/0!
II 5725463	intergenic	intergenic	N/A	147	5	3.4	0	0	#DIV/0!
II 5725465	intergenic	intergenic	N/A	143	7	4.9	0	0	#DIV/0!
II 5725491	intergenic	intergenic	N/A	115	11	9.57	0	0	#DIV/0!
II 5725503	intergenic	intergenic	N/A	116	6	5.17	0	0	#DIV/0!
II 5725516	intergenic	intergenic	N/A	116	5	4.31	0	0	#DIV/0!
II 5725520	intergenic	intergenic	N/A	115	4	3.48	0	0	#DIV/0!
II 5725534	intergenic	intergenic	N/A	101	14	13.86	0	0	#DIV/0!
II 5725538	intergenic	intergenic	N/A	99	4	4.04	0	0	#DIV/0!
II 5725539	intergenic	intergenic	N/A	99	6	6.06	0	0	#DIV/0!
II 5725543	intergenic	intergenic	N/A	104	13	12.5	0	0	#DIV/0!
II 5725545	intergenic	intergenic	N/A	104	8	7.69	0	0	#DIV/0!
II 5725557	intergenic	intergenic	N/A	105	8	7.62	0	0	#DIV/0!
II 5725569	intergenic	intergenic	N/A	101	19	18.81	0	0	#DIV/0!
II 5725585	intergenic	intergenic	N/A	104	7	6.73	0	0	#DIV/0!
II 5725594	intergenic	intergenic	N/A	112	15	13.39	0	0	#DIV/0!
II 5725601	intergenic	intergenic	N/A	116	6	5.17	0	0	#DIV/0!
II 5725605	intergenic	intergenic	N/A	114	11	9.65	0	0	#DIV/0!
II 5725619	intergenic	intergenic	N/A	117	5	4.27	0	0	#DIV/0!
II 5725637	intergenic	intergenic	N/A	118	7	5.93	0	0	#DIV/0!
II 5725656	intergenic	intergenic	N/A	107	5	4.67	0	0	#DIV/0!
II 5725663	intergenic	intergenic	N/A	103	4	3.88	0	0	#DIV/0!
II 5725664	intergenic	intergenic	N/A	103	8	7.77	0	0	#DIV/0!
II 5725667	intergenic	intergenic	N/A	103	4	3.88	0	0	#DIV/0!
II 5725686	intergenic	intergenic	N/A	97	5	5.15	0	0	#DIV/0!
II 5725687	intergenic	intergenic	N/A	97	5	5.15	0	0	#DIV/0!
II 5725725	intergenic	intergenic	N/A	69	4	5.8	0	0	#DIV/0!
II 5725753	intergenic	intergenic	N/A	41	3	7.32	0	0	#DIV/0!
II 9056542	intergenic	intergenic	N/A	50	2	4	207	5	2.41546
II 9274708	intergenic	intergenic	N/A	13	3	23.08	0	0	#DIV/0!
II 10878514	intergenic	intergenic	N/A	10	2	20	0	0	#DIV/0!
II 10878515	intergenic	intergenic	N/A	10	2	20	0	0	#DIV/0!
II 12671982	three_prime_utr	WBGene00004347	rgs-4	56	4	7.14	0	0	#DIV/0!
II 13475991	intergenic	intergenic	N/A	5	2	40	0	0	#DIV/0!
II 14066180	three_prime_utr	WBGene00002275	lem-2	20	4	20	4	2	50
II 14066387	three_prime_utr	WBGene00002275	lem-2	9	8	88.89	4	4	100
II 14066389	three_prime_utr	WBGene00002275	lem-2	9	4	44.44	0	0	#DIV/0!
II 14066391	three_prime_utr	WBGene00002275	lem-2	9	3	33.33	3	1	33.3333
II 14066393	three_prime_utr	WBGene00002275	lem-2	9	3	33.33	4	2	50
II 14066400	three_prime_utr	WBGene00002275	lem-2	9	5	55.5556	0	0	#DIV/0!
II 14066406	three_prime_utr	WBGene00002275	lem-2	9	2	22.22	0	0	#DIV/0!
II 14066422	three_prime_utr	WBGene00002275	lem-2	9	2	22.22	1	1	100
II 14066462	three_prime_utr	WBGene00002275	lem-2	13	2	15.38	0	0	#DIV/0!
II 14066463	three_prime_utr	WBGene00002275	lem-2	13	2	15.38	1	1	100
II 14066484	three_prime_utr	WBGene00002275	lem-2	15	2	13.33	5	3	60
II 14066487	three_prime_utr	WBGene00002275	lem-2	15	2	13.33	0	0	#DIV/0!
II 14066517	three_prime_utr	WBGene00002275	lem-2	9	2	22.22	0	0	#DIV/0!
II 14066565	three_prime_utr	WBGene00002275	lem-2	8	2	25	0	0	#DIV/0!
II 14066573	three_prime_utr	WBGene00002275	lem-2	8	3	37.5	3	1	33.3333
III 850851	three_prime_utr	WBGene00019326	K02F3.2	60	4	6.67	12	2	16.6667
III 1877515	three_prime_utr	WBGene00021444	Y39A3CR.3	34	10	29.41	4	3	75
III 1877516	three_prime_utr	WBGene00021444	Y39A3CR.3	34	6	17.65	4	4	100
III 1877520	three_prime_utr	WBGene00021444	Y39A3CR.3	34	4	11.7647	0	0	#DIV/0!
III 2582249	intergenic	intergenic	N/A	28	17	60.71	0	0	#DIV/0!
III 2582263	intergenic	intergenic	N/A	25	3	12	0	0	#DIV/0!
III 2582284	intergenic	intergenic	N/A	25	8	32	1	1	100
III 2582297	intergenic	intergenic	N/A	25	24	96	1	1	100
III 2582298	intergenic	intergenic	N/A	25	21	84	1	1	100
III 2582301	intergenic	intergenic	N/A	25	9	36	1	1	100
III 2582303	intergenic	intergenic	N/A	27	4	14.81	0	0	#DIV/0!
III 2582701	intergenic	intergenic	N/A	25	15	60	0	0	#DIV/0!
III 3224639	intergenic	intergenic	N/A	5	2	40	0	0	#DIV/0!
III 5283431	intergenic	intergenic	N/A	5	2	40	0	0	#DIV/0!
III 5459517	three_prime_utr	WBGene00018611	F48E8.4	19	13	68.42	3	2	66.6667
III 5459518	three_prime_utr	WBGene00018611	F48E8.4	19	4	21.05	2	1	50
III 5459528	three_prime_utr	WBGene00018611	F48E8.4	17	8	47.06	3	3	100
III 5459532	three_prime_utr	WBGene00018611	F48E8.4	17	3	17.65	3	3	100
III 5459535	three_prime_utr	WBGene00018611	F48E8.4	16	5	31.25	0	0	#DIV/0!
III 5459536	three_prime_utr	WBGene00018611	F48E8.4	15	8	53.33	0	0	#DIV/0!
III 5459537	three_prime_utr	WBGene00018611	F48E8.4	15	2	13.33	0	0	#DIV/0!
III 5459542	three_prime_utr	WBGene00018611	F48E8.4	15	8	53.33	3	3	100
III 5459554	three_prime_utr	WBGene00018611	F48E8.4	14	4	28.57	2	1	50
III 5459555	three_prime_utr	WBGene00018611	F48E8.4	14	3	21.43	2	1	50
III 5459574	three_prime_utr	WBGene00018611	F48E8.4	12	3	25	1	1	100
III 5459575	three_prime_utr	WBGene00018611	F48E8.4	12	2	16.67	0	0	#DIV/0!
III 5459581	three_prime_utr	WBGene00018611	F48E8.4	12	2	16.67	0	0	#DIV/0!
III 5459585	three_prime_utr	WBGene00018611	F48E8.4	11	2	18.18	2	1	50
III 5459586	three_prime_utr	WBGene00018611	F48E8.4	11	3	27.27	2	1	50
III 5459624	three_prime_utr	WBGene00018611	F48E8.4	8	2	25	4	4	100
III 5459625	three_prime_utr	WBGene00018611	F48E8.4	8	2	25	4	4	100
III 5459637	three_prime_utr	WBGene00018611	F48E8.4	7	2	28.57	2	2	100
III 5459651	three_prime_utr	WBGene00018611	F48E8.4	5	3	60	0	0	#DIV/0!
III 5460007	three_prime_utr	WBGene00018611	F48E8.4	5	2	40	0	0	#DIV/0!
III 5460008	three_prime_utr	WBGene00018611	F48E8.4	5	3	60	0	0	#DIV/0!
III 5460009	three_prime_utr	WBGene00018611	F48E8.4	5	2	40	0	0	#DIV/0!
III 5460012	three_prime_utr	WBGene00018611	F48E8.4	5	3	60	0	0	#DIV/0!
III 5460024	three_prime_utr	WBGene00018611	F48E8.4	5	3	60	0	0	#DIV/0!
III 5460032	three_prime_utr	WBGene00018611	F48E8.4	7	2	28.57	0	0	#DIV/0!
III 5460050	three_prime_utr	WBGene00018611	F48E8.4	7	2	28.57	0	0	#DIV/0!
III 5460078	three_prime_utr	WBGene00018611	F48E8.4	8	4	50	0	0	#DIV/0!
III 5460082	three_prime_utr	WBGene00018611	F48E8.4	8	3	37.5	0	0	#DIV/0!
III 5460095	three_prime_utr	WBGene00018611	F48E8.4	8	7	87.5	0	0	#DIV/0!
III 5460099	three_prime_utr	WBGene00018611	F48E8.4	8	2	25	0	0	#DIV/0!
III 5460100	three_prime_utr	WBGene00018611	F48E8.4	8	6	75	0	0	#DIV/0!
III 5460114	three_prime_utr	WBGene00018611	F48E8.4	9	2	22.22	0	0	#DIV/0!
III 5460118	three_prime_utr	WBGene00018611	F48E8.4	9	3	33.33	0	0	#DIV/0!
III 5460119	three_prime_utr	WBGene00018611	F48E8.4	8	2	25	0	0	#DIV/0!
III 5460120	three_prime_utr	WBGene00018611	F48E8.4	8	2	25	0	0	#DIV/0!
III 5460121	three_prime_utr	WBGene00018611	F48E8.4	8	5	62.5	0	0	#DIV/0!
III 5460122	three_prime_utr	WBGene00018611	F48E8.4	8	2	25	0	0	#DIV/0!
III 5460129	three_prime_utr	WBGene00018611	F48E8.4	6	3	50	0	0	#DIV/0!
III 5460140	three_prime_utr	WBGene00018611	F48E8.4	10	2	20	0	0	#DIV/0!
III 5460148	three_prime_utr	WBGene00018611	F48E8.4	9	3	33.33	0	0	#DIV/0!
III 5460149	three_prime_utr	WBGene00018611	F48E8.4	9	2	22.22	0	0	#DIV/0!
III 5460154	three_prime_utr	WBGene00018611	F48E8.4	9	6	66.67	0	0	#DIV/0!
III 5460158	three_prime_utr	WBGene00018611	F48E8.4	9	6	66.67	0	0	#DIV/0!
III 5460166	three_prime_utr	WBGene00018611	F48E8.4	8	4	50	0	0	#DIV/0!
III 5460167	three_prime_utr	WBGene00018611	F48E8.4	8	4	50	0	0	#DIV/0!
III 5460172	three_prime_utr	WBGene00018611	F48E8.4	8	4	50	0	0	#DIV/0!
III 5460176	three_prime_utr	WBGene00018611	F48E8.4	7	2	28.57	0	0	#DIV/0!
III 5460177	three_prime_utr	WBGene00018611	F48E8.4	7	4	57.14	0	0	#DIV/0!
III 5460194	three_prime_utr	WBGene00018611	F48E8.4	6	3	50	0	0	#DIV/0!
III 5460202	three_prime_utr	WBGene00018611	F48E8.4	6	2	33.33	0	0	#DIV/0!
III 5460341	three_prime_utr	WBGene00018611	F48E8.4	13	2	15.38	0	0	#DIV/0!
III 5460349	three_prime_utr	WBGene00018611	F48E8.4	13	6	46.15	0	0	#DIV/0!
III 5460365	three_prime_utr	WBGene00018611	F48E8.4	12	6	50	0	0	#DIV/0!
III 5460369	three_prime_utr	WBGene00018611	F48E8.4	12	4	33.33	0	0	#DIV/0!
III 5460390	three_prime_utr	WBGene00018611	F48E8.4	11	4	36.36	0	0	#DIV/0!
III 5460391	three_prime_utr	WBGene00018611	F48E8.4	11	2	18.18	0	0	#DIV/0!
III 5460396	three_prime_utr	WBGene00018611	F48E8.4	11	3	27.27	0	0	#DIV/0!
III 5460397	three_prime_utr	WBGene00018611	F48E8.4	11	4	36.36	0	0	#DIV/0!
III 5460421	three_prime_utr	WBGene00018611	F48E8.4	7	2	28.57	0	0	#DIV/0!
III 5460425	three_prime_utr	WBGene00018611	F48E8.4	8	3	37.5	0	0	#DIV/0!
III 5460426	three_prime_utr	WBGene00018611	F48E8.4	8	3	37.5	0	0	#DIV/0!
III 5460440	three_prime_utr	WBGene00018611	F48E8.4	5	3	60	2	2	100
III 5460441	three_prime_utr	WBGene00018611	F48E8.4	5	2	40	2	1	50
III 5460458	three_prime_utr	WBGene00018611	F48E8.4	5	2	40	2	1	50
III 5460470	three_prime_utr	WBGene00018611	F48E8.4	5	4	80	2	1	50
III 5460471	three_prime_utr	WBGene00018611	F48E8.4	5	4	80	2	2	100
III 5460472	three_prime_utr	WBGene00018611	F48E8.4	5	3	60	2	1	50
III 5460869	three_prime_utr	WBGene00018611	F48E8.4	9	2	22.22	0	0	#DIV/0!
III 5460902	three_prime_utr	WBGene00018611	F48E8.4	7	2	28.57	0	0	#DIV/0!
III 5460923	three_prime_utr	WBGene00018611	F48E8.4	9	7	77.78	3	3	100
III 5460926	three_prime_utr	WBGene00018611	F48E8.4	9	3	33.33	3	1	33.3333
III 5460934	three_prime_utr	WBGene00018611	F48E8.4	8	4	50	0	0	#DIV/0!
III 5460938	three_prime_utr	WBGene00018611	F48E8.4	8	4	50	0	0	#DIV/0!
III 5460947	three_prime_utr	WBGene00018611	F48E8.4	8	2	25	0	0	#DIV/0!
III 5460959	three_prime_utr	WBGene00018611	F48E8.4	8	2	25	0	0	#DIV/0!
III 5460963	three_prime_utr	WBGene00018611	F48E8.4	8	2	25	0	0	#DIV/0!
III 5460968	three_prime_utr	WBGene00018611	F48E8.4	8	2	25	0	0	#DIV/0!
III 5460973	three_prime_utr	WBGene00018611	F48E8.4	8	6	75	0	0	#DIV/0!
III 5460988	three_prime_utr	WBGene00018611	F48E8.4	6	5	83.33	0	0	#DIV/0!
III 5460989	three_prime_utr	WBGene00018611	F48E8.4	6	5	83.33	0	0	#DIV/0!
III 5460992	three_prime_utr	WBGene00018611	F48E8.4	6	3	50	0	0	#DIV/0!
III 6063613	intergenic	intergenic	N/A	5	2	40	0	0	#DIV/0!
III 6063614	intergenic	intergenic	N/A	5	2	40	0	0	#DIV/0!
III 6063637	intergenic	intergenic	N/A	5	2	40	0	0	#DIV/0!
III 6063652	intergenic	intergenic	N/A	6	3	50	0	0	#DIV/0!
III 6063653	intergenic	intergenic	N/A	6	2	33.33	0	0	#DIV/0!
III 8071714	intergenic	intergenic	N/A	12	2	16.67	0	0	#DIV/0!
III 8071715	intergenic	intergenic	N/A	12	6	50	0	0	#DIV/0!
III 10638207	intergenic	intergenic	N/A	5	2	40	0	0	#DIV/0!
III 10909120	intergenic	intergenic	N/A	49	2	4.08	0	0	#DIV/0!
III 10909133	intergenic	intergenic	N/A	49	2	4.08	0	0	#DIV/0!
III 10909366	intergenic	intergenic	N/A	52	2	3.85	0	0	#DIV/0!
III 10909381	intergenic	intergenic	N/A	51	2	3.92	0	0	#DIV/0!
III 10909382	intergenic	intergenic	N/A	51	3	5.88	0	0	#DIV/0!
III 10909407	intergenic	intergenic	N/A	54	2	3.7	0	0	#DIV/0!
III 10909415	intergenic	intergenic	N/A	56	3	5.36	0	0	#DIV/0!
III 10909442	intergenic	intergenic	N/A	60	2	3.33	0	0	#DIV/0!
III 10909446	intergenic	intergenic	N/A	60	4	6.67	0	0	#DIV/0!
III 10909449	intergenic	intergenic	N/A	56	2	3.57143	0	0	#DIV/0!
III 10909462	intergenic	intergenic	N/A	53	2	3.77	0	0	#DIV/0!
III 10909463	intergenic	intergenic	N/A	53	3	5.66	0	0	#DIV/0!
III 10909485	intergenic	intergenic	N/A	56	3	5.36	0	0	#DIV/0!
III 10909488	intergenic	intergenic	N/A	57	4	7.02	0	0	#DIV/0!
III 10909553	intergenic	intergenic	N/A	68	3	4.41	0	0	#DIV/0!
III 10909554	intergenic	intergenic	N/A	68	3	4.41	0	0	#DIV/0!
III 10909555	intergenic	intergenic	N/A	68	2	2.94	0	0	#DIV/0!
III 10909557	intergenic	intergenic	N/A	67	2	2.99	0	0	#DIV/0!
III 10909578	intergenic	intergenic	N/A	71	2	2.82	0	0	#DIV/0!
III 10909580	intergenic	intergenic	N/A	73	4	5.48	0	0	#DIV/0!
III 10909589	intergenic	intergenic	N/A	81	3	3.7	0	0	#DIV/0!
III 10909594	intergenic	intergenic	N/A	80	3	3.75	0	0	#DIV/0!
III 10909596	intergenic	intergenic	N/A	81	2	2.47	0	0	#DIV/0!
III 10909617	intergenic	intergenic	N/A	86	3	3.49	0	0	#DIV/0!
III 10909618	intergenic	intergenic	N/A	85	3	3.53	0	0	#DIV/0!
III 10909635	intergenic	intergenic	N/A	88	2	2.27	0	0	#DIV/0!
III 10909636	intergenic	intergenic	N/A	88	2	2.27	0	0	#DIV/0!
III 10909642	intergenic	intergenic	N/A	86	4	4.65	0	0	#DIV/0!
III 10909648	intergenic	intergenic	N/A	87	3	3.45	0	0	#DIV/0!
III 10909654	intergenic	intergenic	N/A	84	3	3.57	0	0	#DIV/0!
III 10909665	intergenic	intergenic	N/A	79	2	2.53	0	0	#DIV/0!
III 10909673	intergenic	intergenic	N/A	82	2	2.44	0	0	#DIV/0!
III 10909679	intergenic	intergenic	N/A	80	2	2.5	0	0	#DIV/0!
III 10909680	intergenic	intergenic	N/A	78	3	3.85	0	0	#DIV/0!
III 11803416	intergenic	intergenic	N/A	63	5	7.94	0	0	#DIV/0!
III 12160102	three_prime_utr	WBGene00013544	Y75B8A.7	7	3	42.86	0	0	#DIV/0!
III 12160103	three_prime_utr	WBGene00013544	Y75B8A.7	7	3	42.86	0	0	#DIV/0!
III 12160126	three_prime_utr	WBGene00013544	Y75B8A.7	11	6	54.55	0	0	#DIV/0!
III 12160127	three_prime_utr	WBGene00013544	Y75B8A.7	11	9	81.82	1	1	100
III 12160138	three_prime_utr	WBGene00013544	Y75B8A.7	11	7	63.64	1	1	100
III 12160140	three_prime_utr	WBGene00013544	Y75B8A.7	11	8	72.73	1	1	100
III 12160141	three_prime_utr	WBGene00013544	Y75B8A.7	11	2	18.18	0	0	#DIV/0!
III 12160154	three_prime_utr	WBGene00013544	Y75B8A.7	12	10	83.33	1	1	100
III 12160155	three_prime_utr	WBGene00013544	Y75B8A.7	12	10	83.33	1	1	100
III 12160165	three_prime_utr	WBGene00013544	Y75B8A.7	11	3	27.27	2	2	100
III 12160170	three_prime_utr	WBGene00013544	Y75B8A.7	11	6	54.55	2	1	50
III 12160185	three_prime_utr	WBGene00013544	Y75B8A.7	11	3	27.27	2	1	50
III 12466193	three_prime_utr	WBGene00013040	Y49E10.21	10	3	30	0	0	#DIV/0!
III 12466196	three_prime_utr	WBGene00013040	Y49E10.21	9	4	44.44	0	0	#DIV/0!
III 12466197	three_prime_utr	WBGene00013040	Y49E10.21	9	3	33.33	0	0	#DIV/0!
III 12466200	three_prime_utr	WBGene00013040	Y49E10.21	9	6	66.67	0	0	#DIV/0!
III 12466207	three_prime_utr	WBGene00013040	Y49E10.21	8	4	50	0	0	#DIV/0!
III 12466243	three_prime_utr	WBGene00013040	Y49E10.21	6	2	33.33	0	0	#DIV/0!
III 12466325	three_prime_utr	WBGene00013040	Y49E10.21	8	3	37.5	0	0	#DIV/0!
III 12466327	three_prime_utr	WBGene00013040	Y49E10.21	8	7	87.5	0	0	#DIV/0!
III 12466337	three_prime_utr	WBGene00013040	Y49E10.21	8	6	75	0	0	#DIV/0!
III 12466377	three_prime_utr	WBGene00013040	Y49E10.21	7	2	28.57	0	0	#DIV/0!
III 12698875	intergenic	intergenic	N/A	9	6	66.67	0	0	#DIV/0!
III 12698886	intergenic	intergenic	N/A	10	7	70	1	1	100
III 12698887	intergenic	intergenic	N/A	10	9	90	4	4	100
III 12698889	intergenic	intergenic	N/A	10	2	20	0	0	#DIV/0!
III 12698918	intergenic	intergenic	N/A	9	6	66.67	0	0	#DIV/0!
III 12698920	intergenic	intergenic	N/A	9	6	66.67	0	0	#DIV/0!
III 12710955	three_prime_utr	WBGene00013742	Y111B2A.24	7	4	57.14	1	1	100
III 12744092	three_prime_utr	WBGene00007027	ssl-1	29	3	10.34	2	2	100
III 12744098	three_prime_utr	WBGene00007027	ssl-1	29	6	20.69	2	2	100
III 12744100	three_prime_utr	WBGene00007027	ssl-1	29	4	13.79	1	1	100
III 12744112	three_prime_utr	WBGene00007027	ssl-1	25	3	12	0	0	#DIV/0!
III 12744124	three_prime_utr	WBGene00007027	ssl-1	18	12	66.67	0	0	#DIV/0!
III 12744127	three_prime_utr	WBGene00007027	ssl-1	18	5	27.78	0	0	#DIV/0!
III 12744130	three_prime_utr	WBGene00007027	ssl-1	17	4	23.53	0	0	#DIV/0!
III 12744137	three_prime_utr	WBGene00007027	ssl-1	15	2	13.33	0	0	#DIV/0!
III 12744150	three_prime_utr	WBGene00007027	ssl-1	15	8	53.33	0	0	#DIV/0!
III 12744153	three_prime_utr	WBGene00007027	ssl-1	15	2	13.33	0	0	#DIV/0!
III 12744162	three_prime_utr	WBGene00007027	ssl-1	10	8	80	0	0	#DIV/0!
III 12744163	three_prime_utr	WBGene00007027	ssl-1	10	8	80	0	0	#DIV/0!
III 12744167	three_prime_utr	WBGene00007027	ssl-1	10	5	50	0	0	#DIV/0!
III 12744173	three_prime_utr	WBGene00007027	ssl-1	10	6	60	0	0	#DIV/0!
III 12744176	three_prime_utr	WBGene00007027	ssl-1	10	2	20	0	0	#DIV/0!
III 12744183	three_prime_utr	WBGene00007027	ssl-1	10	3	30	0	0	#DIV/0!
III 12744308	three_prime_utr	WBGene00007027	ssl-1	7	2	28.57	0	0	#DIV/0!
III 12744330	three_prime_utr	WBGene00007027	ssl-1	7	6	85.71	0	0	#DIV/0!
III 12744331	three_prime_utr	WBGene00007027	ssl-1	7	6	85.71	0	0	#DIV/0!
III 12744340	three_prime_utr	WBGene00007027	ssl-1	7	2	28.57	0	0	#DIV/0!
III 12744345	three_prime_utr	WBGene00007027	ssl-1	7	3	42.86	0	0	#DIV/0!
III 12744346	three_prime_utr	WBGene00007027	ssl-1	7	3	42.86	0	0	#DIV/0!
III 12744355	three_prime_utr	WBGene00007027	ssl-1	6	2	33.33	0	0	#DIV/0!
III 12949946	three_prime_utr	WBGene00006762	unc-25	7	2	28.57	0	0	#DIV/0!
III 12949947	three_prime_utr	WBGene00006762	unc-25	7	2	28.57	0	0	#DIV/0!
III 12950692	intergenic	intergenic	N/A	6	3	50	0	0	#DIV/0!
III 12950710	intergenic	intergenic	N/A	7	4	57.14	0	0	#DIV/0!
IV 1715282	intergenic	intergenic	N/A	8	3	37.5	0	0	#DIV/0!
IV 1715283	intergenic	intergenic	N/A	8	2	25	0	0	#DIV/0!
IV 1715308	intergenic	intergenic	N/A	12	6	50	0	0	#DIV/0!
IV 1715314	intergenic	intergenic	N/A	12	7	58.33	0	0	#DIV/0!
IV 1715329	intergenic	intergenic	N/A	12	8	66.67	0	0	#DIV/0!
IV 1715344	intergenic	intergenic	N/A	12	3	25	0	0	#DIV/0!
IV 1715357	intergenic	intergenic	N/A	9	5	55.56	0	0	#DIV/0!
IV 2050301	intergenic	intergenic	N/A	14	2	14.29	0	0	#DIV/0!
IV 2050308	intergenic	intergenic	N/A	16	5	31.25	0	0	#DIV/0!
IV 2050608	intergenic	intergenic	N/A	5	2	40	0	0	#DIV/0!
IV 2050626	intergenic	intergenic	N/A	6	5	83.33	0	0	#DIV/0!
IV 2050664	intergenic	intergenic	N/A	5	2	40	0	0	#DIV/0!
IV 2050665	intergenic	intergenic	N/A	5	4	80	0	0	#DIV/0!
IV 2050666	intergenic	intergenic	N/A	5	4	80	0	0	#DIV/0!
IV 2050692	intergenic	intergenic	N/A	5	3	60	0	0	#DIV/0!
IV 2051220	intergenic	intergenic	N/A	5	2	40	0	0	#DIV/0!
IV 2051224	intergenic	intergenic	N/A	5	3	60	0	0	#DIV/0!
IV 2051226	intergenic	intergenic	N/A	5	3	60	0	0	#DIV/0!
IV 2051250	intergenic	intergenic	N/A	7	3	42.86	0	0	#DIV/0!
IV 2051255	intergenic	intergenic	N/A	7	3	42.86	0	0	#DIV/0!
IV 2051256	intergenic	intergenic	N/A	7	4	57.14	0	0	#DIV/0!
IV 2051261	intergenic	intergenic	N/A	7	3	42.86	0	0	#DIV/0!
IV 2051267	intergenic	intergenic	N/A	7	2	28.57	0	0	#DIV/0!
IV 2051271	intergenic	intergenic	N/A	8	4	50	0	0	#DIV/0!
IV 2051276	intergenic	intergenic	N/A	8	2	25	0	0	#DIV/0!
IV 2051291	intergenic	intergenic	N/A	10	2	20	0	0	#DIV/0!
IV 2051307	intergenic	intergenic	N/A	11	4	36.36	0	0	#DIV/0!
IV 2051326	intergenic	intergenic	N/A	8	5	62.5	0	0	#DIV/0!
IV 2051327	intergenic	intergenic	N/A	8	4	50	0	0	#DIV/0!
IV 2051329	intergenic	intergenic	N/A	8	2	25	0	0	#DIV/0!
IV 2051353	intergenic	intergenic	N/A	6	2	33.33	0	0	#DIV/0!
IV 2051360	intergenic	intergenic	N/A	9	2	22.22	0	0	#DIV/0!
IV 2051369	intergenic	intergenic	N/A	9	2	22.22	0	0	#DIV/0!
IV 2051370	intergenic	intergenic	N/A	9	3	33.33	0	0	#DIV/0!
IV 2051382	intergenic	intergenic	N/A	9	2	22.22	0	0	#DIV/0!
IV 2051384	intergenic	intergenic	N/A	8	6	75	0	0	#DIV/0!
IV 2051392	intergenic	intergenic	N/A	7	4	57.14	0	0	#DIV/0!
IV 2051394	intergenic	intergenic	N/A	7	2	28.57	0	0	#DIV/0!
IV 2051396	intergenic	intergenic	N/A	8	2	25	0	0	#DIV/0!
IV 2051406	intergenic	intergenic	N/A	9	3	33.33	0	0	#DIV/0!
IV 2051419	intergenic	intergenic	N/A	9	5	55.56	0	0	#DIV/0!
IV 7379812	intergenic	intergenic	N/A	5	2	40	0	0	#DIV/0!
IV 7967178	intron	WBGene00019019	frpr-10	8	2	25	0	0	#DIV/0!
IV 7967211	intron	WBGene00019019	frpr-10	9	2	22.22	0	0	#DIV/0!
IV 7970374	intron	WBGene00019019	frpr-10	5	3	60	0	0	#DIV/0!
IV 7970375	intron	WBGene00019019	frpr-10	5	2	40	0	0	#DIV/0!
IV 7970393	intron	WBGene00019019	frpr-10	5	2	40	0	0	#DIV/0!
IV 11542114	intergenic	intergenic	N/A	12	4	33.33	0	0	#DIV/0!
IV 13274719	intergenic	intergenic	N/A	12	4	33.33	0	0	#DIV/0!
V 44859	intron	WBGene00001177	egl-8	5	3	60	0	0	#DIV/0!
V 44875	intron	WBGene00001177	egl-8	5	3	60	0	0	#DIV/0!
V 44885	intron	WBGene00001177	egl-8	6	2	33.33	0	0	#DIV/0!
V 45091	intron	WBGene00001177	egl-8	7	3	42.86	0	0	#DIV/0!
V 45115	intron	WBGene00001177	egl-8	5	2	40	0	0	#DIV/0!
V 45124	intron	WBGene00001177	egl-8	5	2	40	0	0	#DIV/0!
V 45125	intron	WBGene00001177	egl-8	5	2	40	0	0	#DIV/0!
V 45133	intron	WBGene00001177	egl-8	5	3	60	0	0	#DIV/0!
V 617447	intergenic	intergenic	N/A	5	3	60	0	0	#DIV/0!
V 617448	intergenic	intergenic	N/A	5	4	80	0	0	#DIV/0!
V 617483	intergenic	intergenic	N/A	5	3	60	0	0	#DIV/0!
V 617883	intergenic	intergenic	N/A	5	2	40	0	0	#DIV/0!
V 617884	intergenic	intergenic	N/A	5	3	60	0	0	#DIV/0!
V 617886	intergenic	intergenic	N/A	5	4	80	0	0	#DIV/0!
V 686667	three_prime_utr	WBGene00017957	F31F4.1	6	2	33.33	0	0	#DIV/0!
V 686684	three_prime_utr	WBGene00017957	F31F4.1	6	4	66.67	4	2	50
V 686689	three_prime_utr	WBGene00017957	F31F4.1	7	4	57.14	3	1	33.3333
V 686690	three_prime_utr	WBGene00017957	F31F4.1	7	4	57.14	2	2	100
V 686691	three_prime_utr	WBGene00017957	F31F4.1	7	4	57.14	3	1	33.3333
V 686695	three_prime_utr	WBGene00017957	F31F4.1	7	6	85.71	3	2	66.6667
V 686696	three_prime_utr	WBGene00017957	F31F4.1	7	6	85.71	3	3	100
V 686708	three_prime_utr	WBGene00017957	F31F4.1	9	2	22.22	3	3	100
V 686710	three_prime_utr	WBGene00017957	F31F4.1	9	2	22.22	0	0	#DIV/0!
V 686724	three_prime_utr	WBGene00017957	F31F4.1	9	2	22.22	0	0	#DIV/0!
V 686737	three_prime_utr	WBGene00017957	F31F4.1	9	7	77.78	1	1	100
V 686831	three_prime_utr	WBGene00017957	F31F4.1	7	3	42.86	1	1	100
V 686833	three_prime_utr	WBGene00017957	F31F4.1	7	3	42.86	0	0	#DIV/0!
V 686842	three_prime_utr	WBGene00017957	F31F4.1	6	4	66.67	4	2	50
V 686847	three_prime_utr	WBGene00017957	F31F4.1	5	3	60	4	2	50
V 911225	three_prime_utr	WBGene00019241	H24K24.4	6	3	50	0	0	#DIV/0!
V 911246	three_prime_utr	WBGene00019241	H24K24.4	6	3	50	0	0	#DIV/0!
V 911250	three_prime_utr	WBGene00019241	H24K24.4	6	4	66.67	0	0	#DIV/0!
V 911251	three_prime_utr	WBGene00019241	H24K24.4	6	3	50	0	0	#DIV/0!
V 911257	three_prime_utr	WBGene00019241	H24K24.4	6	4	66.67	0	0	#DIV/0!
V 911294	three_prime_utr	WBGene00019241	H24K24.4	5	2	40	0	0	#DIV/0!
V 1158445	intergenic	intergenic	N/A	27	4	14.81	0	0	#DIV/0!
V 2646596	three_prime_utr	WBGene00020957	W02H5.2	6	4	66.6667	0	0	#DIV/0!
V 2646597	three_prime_utr	WBGene00020957	W02H5.2	6	3	50	5	5	100
V 2646602	three_prime_utr	WBGene00020957	W02H5.2	6	3	50	2	2	100
V 2646612	three_prime_utr	WBGene00020957	W02H5.2	6	4	66.67	8	8	100
V 2646622	three_prime_utr	WBGene00020957	W02H5.2	6	3	50	3	3	100
V 2646623	three_prime_utr	WBGene00020957	W02H5.2	6	4	66.67	2	1	50
V 2646698	three_prime_utr	WBGene00020957	W02H5.2	5	2	40	1	1	100
V 2646727	three_prime_utr	WBGene00020957	W02H5.2	11	7	63.64	6	6	100
V 2646728	three_prime_utr	WBGene00020957	W02H5.2	11	2	18.18	0	0	#DIV/0!
V 2646742	three_prime_utr	WBGene00020957	W02H5.2	13	2	15.38	1	1	100
V 2646751	three_prime_utr	WBGene00020957	W02H5.2	14	7	50	5	3	60
V 2646752	three_prime_utr	WBGene00020957	W02H5.2	15	8	53.33	5	3	60
V 2646762	three_prime_utr	WBGene00020957	W02H5.2	15	3	20	0	0	#DIV/0!
V 2646763	three_prime_utr	WBGene00020957	W02H5.2	15	8	53.33	2	2	100
V 2646764	three_prime_utr	WBGene00020957	W02H5.2	15	11	73.33	4	4	100
V 2646770	three_prime_utr	WBGene00020957	W02H5.2	16	10	62.5	4	3	75
V 2646774	three_prime_utr	WBGene00020957	W02H5.2	16	4	25	3	2	66.6667
V 2646778	three_prime_utr	WBGene00020957	W02H5.2	16	5	31.25	2	1	50
V 2646810	three_prime_utr	WBGene00020957	W02H5.2	17	4	23.53	4	2	50
V 2646813	three_prime_utr	WBGene00020957	W02H5.2	17	7	41.18	0	0	#DIV/0!
V 2646819	three_prime_utr	WBGene00020957	W02H5.2	17	12	70.59	3	3	100
V 2646820	three_prime_utr	WBGene00020957	W02H5.2	17	12	70.59	9	5	55.5556
V 2646838	three_prime_utr	WBGene00020957	W02H5.2	16	7	43.75	2	1	50
V 4216021	intergenic	intergenic	N/A	26	3	11.54	0	0	#DIV/0!
V 6795319	three_prime_utr	WBGene00022601	ZC404.1	38	4	10.53	0	0	#DIV/0!
V 6795323	three_prime_utr	WBGene00022601	ZC404.1	41	3	7.32	0	0	#DIV/0!
V 6795324	three_prime_utr	WBGene00022601	ZC404.1	41	3	7.32	0	0	#DIV/0!
V 6795382	three_prime_utr	WBGene00022601	ZC404.1	40	20	50	0	0	#DIV/0!
V 8151577	intergenic	intergenic	N/A	13	2	15.38	0	0	#DIV/0!
V 8151596	intergenic	intergenic	N/A	9	5	55.56	0	0	#DIV/0!
V 8151610	intergenic	intergenic	N/A	8	4	50	0	0	#DIV/0!
V 8151611	intergenic	intergenic	N/A	8	5	62.5	0	0	#DIV/0!
V 8532724	intergenic	intergenic	N/A	5	3	60	0	0	#DIV/0!
V 8532742	intergenic	intergenic	N/A	6	4	66.67	0	0	#DIV/0!
V 8532775	intergenic	intergenic	N/A	6	5	83.33	0	0	#DIV/0!
V 8532776	intergenic	intergenic	N/A	6	5	83.33	0	0	#DIV/0!
V 8532788	intergenic	intergenic	N/A	6	4	66.67	0	0	#DIV/0!
V 8532794	intergenic	intergenic	N/A	6	5	83.33	0	0	#DIV/0!
V 8532796	intergenic	intergenic	N/A	6	3	50	0	0	#DIV/0!
V 8532805	intergenic	intergenic	N/A	5	3	60	0	0	#DIV/0!
V 8532811	intergenic	intergenic	N/A	5	2	40	0	0	#DIV/0!
V 8532812	intergenic	intergenic	N/A	5	2	40	0	0	#DIV/0!
V 18785965	intergenic	intergenic	N/A	7	3	42.86	0	0	#DIV/0!
V 19172115	intergenic	intergenic	N/A	5	4	80	0	0	#DIV/0!
V 19172147	intergenic	intergenic	N/A	5	4	80	0	0	#DIV/0!
V 19173840	intergenic	intergenic	N/A	5	2	40	0	0	#DIV/0!
X 8611410	intergenic	intergenic	N/A	6	3	50	0	0	#DIV/0!
X 8611435	intergenic	intergenic	N/A	5	2	40	0	0	#DIV/0!
X 8611465	intergenic	intergenic	N/A	5	2	40	0	0	#DIV/0!
X 8872000	intergenic	intergenic	N/A	30	3	10	0	0	#DIV/0!
X 8872323	intergenic	intergenic	N/A	38	3	7.89	0	0	#DIV/0!
X 14017802	intergenic	intergenic	N/A	12	5	41.6667	0	0	#DIV/0!
X 14017805	intergenic	intergenic	N/A	12	3	25	0	0	#DIV/0!
X 14757900	intergenic	intergenic	N/A	5	2	40	0	0	#DIV/0!
X 15663704	intergenic	intergenic	N/A	6	3	50	0	0	#DIV/0!
X 15663897	intergenic	intergenic	N/A	5	2	40	0	0	#DIV/0!
X 15663904	intergenic	intergenic	N/A	5	4	80	0	0	#DIV/0!
X 15664073	intergenic	intergenic	N/A	5	4	80	0	0	#DIV/0!
X 15664074	intergenic	intergenic	N/A	5	4	80	0	0	#DIV/0!
X 15664087	intergenic	intergenic	N/A	5	3	60	0	0	#DIV/0!
X 15664088	intergenic	intergenic	N/A	5	3	60	0	0	#DIV/0!
X 16054661	intergenic	intergenic	N/A	11	2	18.18	0	0	#DIV/0!
X 16223709	three_prime_utr	WBGene00009068	F23A7.3	29	5	17.24	0	0	#DIV/0!
X 16223742	three_prime_utr	WBGene00009068	F23A7.3	22	5	22.73	0	0	#DIV/0!
X 16223743	three_prime_utr	WBGene00009068	F23A7.3	22	19	86.36	2	2	100
X 16223744	three_prime_utr	WBGene00009068	F23A7.3	22	3	13.64	0	0	#DIV/0!
X 16223748	three_prime_utr	WBGene00009068	F23A7.3	23	10	43.48	3	3	100
X 16223756	three_prime_utr	WBGene00009068	F23A7.3	23	7	30.43	1	1	100
X 16223763	three_prime_utr	WBGene00009068	F23A7.3	22	6	27.27	1	1	100
X 16223769	three_prime_utr	WBGene00009068	F23A7.3	22	9	40.91	1	1	100
X 16223785	three_prime_utr	WBGene00009068	F23A7.3	18	3	16.67	1	1	100
X 16223794	three_prime_utr	WBGene00009068	F23A7.3	17	3	17.65	1	1	100
X 16223802	three_prime_utr	WBGene00009068	F23A7.3	15	2	13.33	1	1	100
X 16223807	three_prime_utr	WBGene00009068	F23A7.3	14	2	14.29	0	0	#DIV/0!
X 16223809	three_prime_utr	WBGene00009068	F23A7.3	14	3	21.43	1	1	100
X 16223819	three_prime_utr	WBGene00009068	F23A7.3	14	2	14.29	0	0	#DIV/0!
X 16223827	three_prime_utr	WBGene00009068	F23A7.3	12	3	25	0	0	#DIV/0!
X 16224016	three_prime_utr	WBGene00009068	F23A7.3	17	5	29.41	0	0	#DIV/0!
X 16224025	three_prime_utr	WBGene00009068	F23A7.3	19	15	78.95	0	0	#DIV/0!
X 16224053	three_prime_utr	WBGene00009068	F23A7.3	21	14	66.67	1	1	100
X 16224065	three_prime_utr	WBGene00009068	F23A7.3	21	7	33.33	0	0	#DIV/0!
X 16224067	three_prime_utr	WBGene00009068	F23A7.3	21	3	14.29	0	0	#DIV/0!
X 16224070	three_prime_utr	WBGene00009068	F23A7.3	21	11	52.38	0	0	#DIV/0!
X 16224071	three_prime_utr	WBGene00009068	F23A7.3	21	6	28.57	0	0	#DIV/0!
X 16224093	three_prime_utr	WBGene00009068	F23A7.3	18	4	22.22	1	1	100
X 16224094	three_prime_utr	WBGene00009068	F23A7.3	18	5	27.78	0	0	#DIV/0!
X 16224101	three_prime_utr	WBGene00009068	F23A7.3	16	2	12.5	0	0	#DIV/0!
X 16224106	three_prime_utr	WBGene00009068	F23A7.3	16	5	31.25	0	0	#DIV/0!
X 16224135	three_prime_utr	WBGene00009068	F23A7.3	17	3	17.65	0	0	#DIV/0!
X 16224140	three_prime_utr	WBGene00009068	F23A7.3	15	4	26.67	0	0	#DIV/0!
X 16224161	three_prime_utr	WBGene00009068	F23A7.3	13	2	15.38	0	0	#DIV/0!
X 16224171	three_prime_utr	WBGene00009068	F23A7.3	11	7	63.64	0	0	#DIV/0!
X 16224207	three_prime_utr	WBGene00009068	F23A7.3	6	2	33.33	0	0	#DIV/0!
X 16903209	intergenic	intergenic	N/A	49	13	26.53	0	0	#DIV/0!
X 16903464	intergenic	intergenic	N/A	22	11	50	0	0	#DIV/0!
X 16903745	intergenic	intergenic	N/A	22	20	90.91	0	0	#DIV/0!
X 16903767	intergenic	intergenic	N/A	22	5	22.73	0	0	#DIV/0!
X 16903771	intergenic	intergenic	N/A	22	5	22.73	0	0	#DIV/0!
X 16903787	intergenic	intergenic	N/A	18	3	16.67	1	1	100
X 16903828	intergenic	intergenic	N/A	19	3	15.79	3	3	100
X 16903829	intergenic	intergenic	N/A	19	3	15.79	0	0	#DIV/0!
X 16903838	intergenic	intergenic	N/A	20	7	35	3	3	100
X 16903845	intergenic	intergenic	N/A	20	5	25	0	0	#DIV/0!
X 16903854	intergenic	intergenic	N/A	22	15	68.18	3	3	100
I 912013	intergenic	intergenic	N/A	5	3	60	0	0	#DIV/0!
I 912256	intergenic	intergenic	N/A	15	2	13.33	0	0	#DIV/0!
I 912267	intergenic	intergenic	N/A	15	2	13.33	0	0	#DIV/0!
I 912296	intergenic	intergenic	N/A	13	2	15.38	0	0	#DIV/0!
I 1258902	three_prime_utr	WBGene00001707	grh-1	8	3	37.5	4	2	50
I 1258912	three_prime_utr	WBGene00001707	grh-1	7	2	28.57	0	0	#DIV/0!
I 1258922	three_prime_utr	WBGene00001707	grh-1	7	3	42.86	0	0	#DIV/0!
I 1258925	three_prime_utr	WBGene00001707	grh-1	6	5	83.33	4	4	100
I 1258937	three_prime_utr	WBGene00001707	grh-1	5	2	40	0	0	#DIV/0!
I 1259356	three_prime_utr	WBGene00001707	grh-1	6	3	50	1	1	100
I 1259367	three_prime_utr	WBGene00001707	grh-1	6	2	33.33	0	0	#DIV/0!
I 1259368	three_prime_utr	WBGene00001707	grh-1	6	5	83.33	0	0	#DIV/0!
I 1347020	intergenic	intergenic	N/A	14	4	28.57	0	0	#DIV/0!
I 1347071	intergenic	intergenic	N/A	16	3	18.75	7	3	42.8571
I 1347095	intergenic	intergenic	N/A	17	14	82.35	11	11	100
I 1347101	intergenic	intergenic	N/A	17	4	23.53	7	4	57.1429
I 1347102	intergenic	intergenic	N/A	17	6	35.29	7	2	28.5714
I 1347107	intergenic	intergenic	N/A	17	4	23.53	0	0	#DIV/0!
I 1347108	intergenic	intergenic	N/A	16	2	12.5	4	4	100
I 1347117	intergenic	intergenic	N/A	18	16	88.89	9	7	77.7778
I 1347118	intergenic	intergenic	N/A	17	13	76.47	9	7	77.7778
I 1347129	intergenic	intergenic	N/A	23	14	60.87	5	2	40
I 1347136	intergenic	intergenic	N/A	24	18	75	8	7	87.5
I 1347138	intergenic	intergenic	N/A	24	4	16.67	7	4	57.1429
I 1347143	intergenic	intergenic	N/A	25	18	72	4	1	25
I 1347144	intergenic	intergenic	N/A	25	4	16	0	0	#DIV/0!
I 1347191	intergenic	intergenic	N/A	35	4	11.43	0	0	#DIV/0!
I 1347196	intergenic	intergenic	N/A	35	4	11.43	0	0	#DIV/0!
I 1347216	intergenic	intergenic	N/A	39	33	84.62	6	3	50
I 1347222	intergenic	intergenic	N/A	42	8	19.05	2	1	50
I 1347223	intergenic	intergenic	N/A	42	3	7.14	0	0	#DIV/0!
I 1347228	intergenic	intergenic	N/A	43	19	44.19	9	6	66.6667
I 1347229	intergenic	intergenic	N/A	42	19	45.24	3	2	66.6667
I 1347259	intergenic	intergenic	N/A	49	14	28.57	10	5	50
I 1347264	intergenic	intergenic	N/A	49	7	14.29	3	2	66.6667
I 1347581	intergenic	intergenic	N/A	57	10	17.54	0	0	#DIV/0!
I 1347589	intergenic	intergenic	N/A	54	4	7.41	0	0	#DIV/0!
I 1347590	intergenic	intergenic	N/A	54	17	31.48	0	0	#DIV/0!
I 1347600	intergenic	intergenic	N/A	53	5	9.43	1	1	100
I 1347604	intergenic	intergenic	N/A	51	6	11.76	3	1	33.3333
I 1347605	intergenic	intergenic	N/A	51	33	64.71	6	4	66.6667
I 1347606	intergenic	intergenic	N/A	51	6	11.76	0	0	#DIV/0!
I 1347614	intergenic	intergenic	N/A	49	7	14.29	2	2	100
I 1347615	intergenic	intergenic	N/A	49	6	12.24	0	0	#DIV/0!
I 1347627	intergenic	intergenic	N/A	49	4	8.16	0	0	#DIV/0!
I 1347655	intergenic	intergenic	N/A	44	3	6.82	0	0	#DIV/0!
I 1347659	intergenic	intergenic	N/A	42	3	7.14	0	0	#DIV/0!
I 1347675	intergenic	intergenic	N/A	28	23	82.14	0	0	#DIV/0!
I 1347683	intergenic	intergenic	N/A	27	21	77.78	5	5	100
I 1347684	intergenic	intergenic	N/A	27	4	14.81	3	1	33.3333
I 1347686	intergenic	intergenic	N/A	27	15	55.56	0	0	#DIV/0!
I 1347693	intergenic	intergenic	N/A	27	4	14.81	0	0	#DIV/0!
I 1347713	intergenic	intergenic	N/A	12	3	25	2	1	50
I 1347714	intergenic	intergenic	N/A	12	2	16.67	5	5	100
I 1347724	intergenic	intergenic	N/A	10	2	20	1	1	100
I 1347726	intergenic	intergenic	N/A	6	4	66.67	1	1	100
I 1347730	intergenic	intergenic	N/A	6	4	66.67	1	1	100
I 1347731	intergenic	intergenic	N/A	6	3	50	0	0	#DIV/0!
I 1347735	intergenic	intergenic	N/A	6	3	50	1	1	100
I 1347736	intergenic	intergenic	N/A	6	3	50	0	0	#DIV/0!
I 1347740	intergenic	intergenic	N/A	7	4	57.14	0	0	#DIV/0!
I 1347770	intergenic	intergenic	N/A	6	2	33.33	0	0	#DIV/0!
I 1347771	intergenic	intergenic	N/A	6	3	50	0	0	#DIV/0!
I 1347772	intergenic	intergenic	N/A	6	3	50	0	0	#DIV/0!
I 1347786	intergenic	intergenic	N/A	7	4	57.14	0	0	#DIV/0!
I 1347787	intergenic	intergenic	N/A	7	4	57.14	0	0	#DIV/0!
I 1347790	intergenic	intergenic	N/A	7	2	28.57	0	0	#DIV/0!
I 1347803	intergenic	intergenic	N/A	7	3	42.86	0	0	#DIV/0!
I 1347812	intergenic	intergenic	N/A	7	2	28.57	0	0	#DIV/0!
I 1347814	intergenic	intergenic	N/A	7	2	28.57	0	0	#DIV/0!
I 1347820	intergenic	intergenic	N/A	8	2	25	0	0	#DIV/0!
I 1347823	intergenic	intergenic	N/A	8	5	62.5	1	1	100
I 1347832	intergenic	intergenic	N/A	8	2	25	0	0	#DIV/0!
I 1347843	intergenic	intergenic	N/A	12	6	50	0	0	#DIV/0!
I 1347888	intergenic	intergenic	N/A	12	3	25	0	0	#DIV/0!
I 1347900	intergenic	intergenic	N/A	12	3	25	1	1	100
I 1347901	intergenic	intergenic	N/A	12	6	50	1	1	100
I 1347918	intergenic	intergenic	N/A	9	6	66.67	0	0	#DIV/0!
I 1347923	intergenic	intergenic	N/A	9	3	33.33	0	0	#DIV/0!
I 1347924	intergenic	intergenic	N/A	9	3	33.33	0	0	#DIV/0!
I 1347925	intergenic	intergenic	N/A	9	2	22.22	0	0	#DIV/0!
I 1347926	intergenic	intergenic	N/A	9	2	22.22	0	0	#DIV/0!
I 1347927	intergenic	intergenic	N/A	9	3	33.33	0	0	#DIV/0!
I 1347929	intergenic	intergenic	N/A	9	3	33.33	0	0	#DIV/0!
I 1347939	intergenic	intergenic	N/A	9	4	44.44	0	0	#DIV/0!
I 1347952	intergenic	intergenic	N/A	8	3	37.5	1	1	100
I 1347964	intergenic	intergenic	N/A	7	5	71.43	0	0	#DIV/0!
I 1347965	intergenic	intergenic	N/A	7	3	42.86	0	0	#DIV/0!
I 1347969	intergenic	intergenic	N/A	7	4	57.14	0	0	#DIV/0!
I 1348792	intergenic	intergenic	N/A	5	2	40	0	0	#DIV/0!
I 1349167	intergenic	intergenic	N/A	5	2	40	0	0	#DIV/0!
I 1349168	intergenic	intergenic	N/A	5	2	40	0	0	#DIV/0!
I 1349169	intergenic	intergenic	N/A	5	2	40	0	0	#DIV/0!
I 1350515	intergenic	intergenic	N/A	5	2	40	0	0	#DIV/0!
I 1350526	intergenic	intergenic	N/A	5	2	40	0	0	#DIV/0!
I 1350551	intergenic	intergenic	N/A	5	4	80	0	0	#DIV/0!
I 1350552	intergenic	intergenic	N/A	5	4	80	0	0	#DIV/0!
I 1350559	intergenic	intergenic	N/A	5	2	40	0	0	#DIV/0!
I 1350562	intergenic	intergenic	N/A	5	3	60	0	0	#DIV/0!
I 1350563	intergenic	intergenic	N/A	5	3	60	0	0	#DIV/0!
I 1425475	intergenic	intergenic	N/A	18	5	27.78	0	0	#DIV/0!
I 1425507	intergenic	intergenic	N/A	18	10	55.56	0	0	#DIV/0!
I 1425972	intergenic	intergenic	N/A	21	3	14.29	0	0	#DIV/0!
I 1425977	intergenic	intergenic	N/A	19	4	21.05	1	1	100
I 1425993	intergenic	intergenic	N/A	18	15	83.33	0	0	#DIV/0!
I 1425994	intergenic	intergenic	N/A	19	15	78.95	0	0	#DIV/0!
I 1426003	intergenic	intergenic	N/A	22	5	22.73	0	0	#DIV/0!
I 1426016	intergenic	intergenic	N/A	23	22	95.65	0	0	#DIV/0!
I 1426026	intergenic	intergenic	N/A	25	16	64	0	0	#DIV/0!
I 1426039	intergenic	intergenic	N/A	17	16	94.12	0	0	#DIV/0!
I 1426040	intergenic	intergenic	N/A	17	7	41.18	0	0	#DIV/0!
I 1426043	intergenic	intergenic	N/A	17	3	17.65	0	0	#DIV/0!
I 1426046	intergenic	intergenic	N/A	16	2	12.5	0	0	#DIV/0!
I 1426059	intergenic	intergenic	N/A	17	9	52.94	0	0	#DIV/0!
I 1426095	intergenic	intergenic	N/A	13	7	53.85	0	0	#DIV/0!
I 1426101	intergenic	intergenic	N/A	15	2	13.33	0	0	#DIV/0!
I 1426107	intergenic	intergenic	N/A	15	2	13.33	0	0	#DIV/0!
I 1426108	intergenic	intergenic	N/A	15	13	86.67	0	0	#DIV/0!
I 1426109	intergenic	intergenic	N/A	15	10	66.67	0	0	#DIV/0!
I 1426110	intergenic	intergenic	N/A	16	5	31.25	0	0	#DIV/0!
I 1426111	intergenic	intergenic	N/A	16	4	25	0	0	#DIV/0!
I 1426129	intergenic	intergenic	N/A	19	4	21.05	0	0	#DIV/0!
I 1426167	intergenic	intergenic	N/A	16	6	37.5	0	0	#DIV/0!
I 1426168	intergenic	intergenic	N/A	14	9	64.29	0	0	#DIV/0!
I 1426179	intergenic	intergenic	N/A	16	4	25	0	0	#DIV/0!
I 1426183	intergenic	intergenic	N/A	16	7	43.75	0	0	#DIV/0!
I 1426200	intergenic	intergenic	N/A	15	8	53.33	0	0	#DIV/0!
I 1426201	intergenic	intergenic	N/A	15	4	26.67	0	0	#DIV/0!
I 1426204	intergenic	intergenic	N/A	15	12	80	1	1	100
I 1426205	intergenic	intergenic	N/A	15	3	20	0	0	#DIV/0!
I 1426211	intergenic	intergenic	N/A	15	5	33.33	0	0	#DIV/0!
I 1426346	intergenic	intergenic	N/A	13	5	38.46	0	0	#DIV/0!
I 1426357	intergenic	intergenic	N/A	13	4	30.77	0	0	#DIV/0!
I 1426362	intergenic	intergenic	N/A	13	3	23.08	0	0	#DIV/0!
I 1426363	intergenic	intergenic	N/A	13	4	30.77	0	0	#DIV/0!
I 1426375	intergenic	intergenic	N/A	13	4	30.77	0	0	#DIV/0!
I 1426392	intergenic	intergenic	N/A	14	13	92.86	0	0	#DIV/0!
I 1426405	intergenic	intergenic	N/A	13	9	69.23	0	0	#DIV/0!
I 1426411	intergenic	intergenic	N/A	13	2	15.38	0	0	#DIV/0!
I 1426412	intergenic	intergenic	N/A	13	2	15.38	0	0	#DIV/0!
I 1426424	intergenic	intergenic	N/A	14	3	21.43	0	0	#DIV/0!
I 1426568	intergenic	intergenic	N/A	5	3	60	0	0	#DIV/0!
I 1426574	intergenic	intergenic	N/A	5	2	40	0	0	#DIV/0!
I 1434332	intergenic	intergenic	N/A	6	2	33.33	0	0	#DIV/0!
I 1434355	intergenic	intergenic	N/A	6	3	50	0	0	#DIV/0!
I 1434359	intergenic	intergenic	N/A	6	2	33.33	0	0	#DIV/0!
I 1434369	intergenic	intergenic	N/A	5	4	80	0	0	#DIV/0!
I 1434371	intergenic	intergenic	N/A	6	2	33.33	0	0	#DIV/0!
I 1434399	intergenic	intergenic	N/A	6	2	33.33	0	0	#DIV/0!
I 1434416	intergenic	intergenic	N/A	7	3	42.86	0	0	#DIV/0!
I 1434423	intergenic	intergenic	N/A	8	2	25	0	0	#DIV/0!
I 1434428	intergenic	intergenic	N/A	7	4	57.14	0	0	#DIV/0!
I 1434436	intergenic	intergenic	N/A	7	2	28.57	0	0	#DIV/0!
I 1434440	intergenic	intergenic	N/A	6	3	50	0	0	#DIV/0!
I 1434442	intergenic	intergenic	N/A	6	4	66.67	0	0	#DIV/0!
I 1434452	intergenic	intergenic	N/A	6	5	83.33	0	0	#DIV/0!
I 1434459	intergenic	intergenic	N/A	7	2	28.57	0	0	#DIV/0!
I 1434478	intergenic	intergenic	N/A	7	6	85.71	0	0	#DIV/0!
I 1434507	intergenic	intergenic	N/A	6	5	83.33	0	0	#DIV/0!
I 1434512	intergenic	intergenic	N/A	6	5	83.33	0	0	#DIV/0!
I 1434526	intergenic	intergenic	N/A	6	2	33.33	0	0	#DIV/0!
I 1434529	intergenic	intergenic	N/A	6	4	66.67	0	0	#DIV/0!
I 1434677	intergenic	intergenic	N/A	7	2	28.57	0	0	#DIV/0!
I 1434690	intergenic	intergenic	N/A	9	2	22.22	0	0	#DIV/0!
I 1434691	intergenic	intergenic	N/A	9	6	66.67	0	0	#DIV/0!
I 1434720	intergenic	intergenic	N/A	9	2	22.22	0	0	#DIV/0!
I 1434736	intergenic	intergenic	N/A	10	6	60	0	0	#DIV/0!
I 1434737	intergenic	intergenic	N/A	10	9	90	0	0	#DIV/0!
I 1434738	intergenic	intergenic	N/A	10	9	90	0	0	#DIV/0!
I 1434762	intergenic	intergenic	N/A	10	5	50	0	0	#DIV/0!
I 1434768	intergenic	intergenic	N/A	10	2	20	0	0	#DIV/0!
I 1434802	intergenic	intergenic	N/A	10	6	60	0	0	#DIV/0!
I 1434808	intergenic	intergenic	N/A	8	4	50	0	0	#DIV/0!
I 1434809	intergenic	intergenic	N/A	8	7	87.5	0	0	#DIV/0!
I 1434836	intergenic	intergenic	N/A	8	6	75	0	0	#DIV/0!
I 1434847	intergenic	intergenic	N/A	7	3	42.86	0	0	#DIV/0!
I 1434849	intergenic	intergenic	N/A	7	6	85.71	0	0	#DIV/0!
I 1597359	intergenic	intergenic	N/A	12	2	16.67	0	0	#DIV/0!
I 1597360	intergenic	intergenic	N/A	13	2	15.38	0	0	#DIV/0!
I 1597445	intergenic	intergenic	N/A	11	2	18.18	0	0	#DIV/0!
I 1597486	intergenic	intergenic	N/A	16	2	12.5	0	0	#DIV/0!
I 1597491	intergenic	intergenic	N/A	16	2	12.5	0	0	#DIV/0!
I 2047301	intergenic	intergenic	N/A	5	2	40	0	0	#DIV/0!
I 2047302	intergenic	intergenic	N/A	5	2	40	0	0	#DIV/0!
I 2047317	intergenic	intergenic	N/A	5	2	40	0	0	#DIV/0!
I 2047318	intergenic	intergenic	N/A	5	2	40	0	0	#DIV/0!
I 2375638	three_prime_utr	WBGene00021473	sydn-1	19	3	15.79	0	0	#DIV/0!
I 2375651	three_prime_utr	WBGene00021473	sydn-1	19	5	26.32	3	3	100
I 2375708	three_prime_utr	WBGene00021473	sydn-1	14	2	14.29	0	0	#DIV/0!
I 2375711	three_prime_utr	WBGene00021473	sydn-1	13	3	23.08	1	1	100
I 2375742	three_prime_utr	WBGene00021473	sydn-1	10	3	30	0	0	#DIV/0!
I 2375746	three_prime_utr	WBGene00021473	sydn-1	10	2	20	2	2	100
I 2375751	three_prime_utr	WBGene00021473	sydn-1	9	4	44.44	2	2	100
I 2376087	three_prime_utr	WBGene00021473	sydn-1	29	14	48.28	1	1	100
I 2376103	three_prime_utr	WBGene00021473	sydn-1	34	3	8.82	0	0	#DIV/0!
I 2376104	three_prime_utr	WBGene00021473	sydn-1	34	4	11.76	0	0	#DIV/0!
I 2376109	three_prime_utr	WBGene00021473	sydn-1	37	10	27.03	0	0	#DIV/0!
I 2376116	three_prime_utr	WBGene00021473	sydn-1	37	18	48.65	0	0	#DIV/0!
I 2376118	three_prime_utr	WBGene00021473	sydn-1	35	9	25.71	1	1	100
I 2376119	three_prime_utr	WBGene00021473	sydn-1	35	11	31.43	1	1	100
I 2376122	three_prime_utr	WBGene00021473	sydn-1	34	24	70.59	0	0	#DIV/0!
I 2376123	three_prime_utr	WBGene00021473	sydn-1	35	10	28.57	0	0	#DIV/0!
I 2376174	three_prime_utr	WBGene00021473	sydn-1	46	23	50	0	0	#DIV/0!
I 2376179	three_prime_utr	WBGene00021473	sydn-1	44	3	6.82	0	0	#DIV/0!
I 2376205	three_prime_utr	WBGene00021473	sydn-1	43	6	13.95	0	0	#DIV/0!
I 2415327	intergenic	intergenic	N/A	60	2	3.33	0	0	#DIV/0!
I 2822920	three_prime_utr	WBGene00004077	pop-1	8	2	25	1	1	100
I 2822978	three_prime_utr	WBGene00004077	pop-1	7	4	57.14	0	0	#DIV/0!
I 2870459	three_prime_utr	WBGene00022117	Y71F9AL.12	5	4	80	0	0	#DIV/0!
I 2966663	intergenic	intergenic	N/A	17	5	29.41	1	1	100
I 3034073	intergenic	intergenic	N/A	20	2	10	0	0	#DIV/0!
I 3034079	intergenic	intergenic	N/A	20	4	20	0	0	#DIV/0!
I 8548154	intergenic	intergenic	N/A	7	2	28.57	0	0	#DIV/0!
I 9994570	three_prime_utr	WBGene00000476	cfi-1	55	9	16.36	0	0	#DIV/0!
I 10778924	intergenic	intergenic	N/A	9	2	22.22	0	0	#DIV/0!
I 10778958	intergenic	intergenic	N/A	10	2	20	0	0	#DIV/0!
I 10778959	intergenic	intergenic	N/A	10	2	20	0	0	#DIV/0!
I 10779001	intergenic	intergenic	N/A	9	2	22.22	0	0	#DIV/0!
I 10779191	intergenic	intergenic	N/A	13	2	15.38	0	0	#DIV/0!
I 10779212	intergenic	intergenic	N/A	13	2	15.38	0	0	#DIV/0!
I 10819154	intergenic	intergenic	N/A	93	5	5.38	10	1	10
I 10819192	intergenic	intergenic	N/A	94	14	14.89	0	0	#DIV/0!
I 10819205	intergenic	intergenic	N/A	97	7	7.22	0	0	#DIV/0!
I 10819213	intergenic	intergenic	N/A	98	12	12.24	0	0	#DIV/0!
I 10819214	intergenic	intergenic	N/A	99	3	3.03	0	0	#DIV/0!
I 10819216	intergenic	intergenic	N/A	100	7	7	0	0	#DIV/0!
I 10819225	intergenic	intergenic	N/A	104	10	9.62	0	0	#DIV/0!
I 10819229	intergenic	intergenic	N/A	108	3	2.78	0	0	#DIV/0!
I 10819236	intergenic	intergenic	N/A	106	4	3.77	0	0	#DIV/0!
I 10819238	intergenic	intergenic	N/A	107	9	8.41	0	0	#DIV/0!
I 10819248	intergenic	intergenic	N/A	107	6	5.61	0	0	#DIV/0!
I 10819261	intergenic	intergenic	N/A	107	9	8.41	0	0	#DIV/0!
I 10819262	intergenic	intergenic	N/A	107	13	12.15	8	1	12.5
I 10819263	intergenic	intergenic	N/A	107	5	4.67	0	0	#DIV/0!
I 10819271	intergenic	intergenic	N/A	109	15	13.76	13	2	15.3846
I 10819272	intergenic	intergenic	N/A	109	19	17.43	21	6	28.5714
I 10819277	intergenic	intergenic	N/A	107	8	7.48	9	2	22.2222
I 10819278	intergenic	intergenic	N/A	106	12	11.32	0	0	#DIV/0!
I 10819284	intergenic	intergenic	N/A	102	3	2.94	14	2	14.2857
I 10819312	intergenic	intergenic	N/A	101	6	5.94	17	5	29.4118
I 10819313	intergenic	intergenic	N/A	101	6	5.94	13	2	15.3846
I 10819322	intergenic	intergenic	N/A	100	7	7	10	1	10
I 10819326	intergenic	intergenic	N/A	99	8	8.08	10	1	10
I 10819329	intergenic	intergenic	N/A	96	15	15.62	21	5	23.8095
I 10819331	intergenic	intergenic	N/A	94	9	9.57	7	2	28.5714
I 10819341	intergenic	intergenic	N/A	91	15	16.48	17	4	23.5294
I 10819346	intergenic	intergenic	N/A	97	3	3.09	0	0	#DIV/0!
I 10819356	intergenic	intergenic	N/A	98	3	3.06	0	0	#DIV/0!
I 10819357	intergenic	intergenic	N/A	100	3	3	0	0	#DIV/0!
I 10819358	intergenic	intergenic	N/A	100	4	4	0	0	#DIV/0!
I 10819363	intergenic	intergenic	N/A	100	13	13	0	0	#DIV/0!
I 10819375	intergenic	intergenic	N/A	85	7	8.24	0	0	#DIV/0!
I 10819376	intergenic	intergenic	N/A	84	7	8.33	0	0	#DIV/0!
I 10819377	intergenic	intergenic	N/A	85	7	8.24	0	0	#DIV/0!
I 10819378	intergenic	intergenic	N/A	85	2	2.35	0	0	#DIV/0!
I 10819388	intergenic	intergenic	N/A	82	2	2.44	0	0	#DIV/0!
I 10819389	intergenic	intergenic	N/A	82	2	2.44	0	0	#DIV/0!
I 10819398	intergenic	intergenic	N/A	84	4	4.76	0	0	#DIV/0!
I 10819433	intergenic	intergenic	N/A	93	2	2.15	0	0	#DIV/0!
I 10819439	intergenic	intergenic	N/A	99	3	3.03	0	0	#DIV/0!
I 10819457	intergenic	intergenic	N/A	100	6	6	0	0	#DIV/0!
I 10819458	intergenic	intergenic	N/A	100	4	4	0	0	#DIV/0!
I 10819462	intergenic	intergenic	N/A	100	2	2	0	0	#DIV/0!
I 10819476	intergenic	intergenic	N/A	107	4	3.74	0	0	#DIV/0!
I 10819477	intergenic	intergenic	N/A	108	2	1.85	0	0	#DIV/0!
I 10819483	intergenic	intergenic	N/A	108	2	1.85	0	0	#DIV/0!
I 10819500	intergenic	intergenic	N/A	112	3	2.68	0	0	#DIV/0!
I 10819501	intergenic	intergenic	N/A	110	3	2.73	0	0	#DIV/0!
I 10819502	intergenic	intergenic	N/A	109	4	3.67	0	0	#DIV/0!
I 10819539	intergenic	intergenic	N/A	110	2	1.82	0	0	#DIV/0!
I 10819664	intergenic	intergenic	N/A	103	3	2.91	0	0	#DIV/0!
I 10819674	intergenic	intergenic	N/A	106	2	1.89	23	3	13.0435
I 10819677	intergenic	intergenic	N/A	108	4	3.7	0	0	#DIV/0!
I 10819681	intergenic	intergenic	N/A	108	7	6.48	23	6	26.087
I 10819682	intergenic	intergenic	N/A	107	3	2.8	10	5	50
I 10819696	intergenic	intergenic	N/A	107	4	3.74	0	0	#DIV/0!
I 10819704	intergenic	intergenic	N/A	111	2	1.8	0	0	#DIV/0!
I 10819707	intergenic	intergenic	N/A	109	3	2.75	0	0	#DIV/0!
I 10819716	intergenic	intergenic	N/A	110	3	2.73	0	0	#DIV/0!
I 10819717	intergenic	intergenic	N/A	110	6	5.45	0	0	#DIV/0!
I 10819718	intergenic	intergenic	N/A	110	6	5.45	0	0	#DIV/0!
I 10819719	intergenic	intergenic	N/A	111	2	1.8	0	0	#DIV/0!
I 10819749	intergenic	intergenic	N/A	123	8	6.5	0	0	#DIV/0!
I 10819750	intergenic	intergenic	N/A	123	10	8.13	0	0	#DIV/0!
I 10819751	intergenic	intergenic	N/A	125	5	4	0	0	#DIV/0!
I 10819752	intergenic	intergenic	N/A	125	3	2.4	0	0	#DIV/0!
I 10819753	intergenic	intergenic	N/A	125	3	2.4	0	0	#DIV/0!
I 10819768	intergenic	intergenic	N/A	121	15	12.4	0	0	#DIV/0!
I 10819775	intergenic	intergenic	N/A	124	4	3.23	0	0	#DIV/0!
I 10819778	intergenic	intergenic	N/A	123	12	9.76	0	0	#DIV/0!
I 10819779	intergenic	intergenic	N/A	124	11	8.87	0	0	#DIV/0!
I 10819782	intergenic	intergenic	N/A	124	16	12.9032	0	0	#DIV/0!
I 10819790	intergenic	intergenic	N/A	123	5	4.07	0	0	#DIV/0!
I 10819908	intergenic	intergenic	N/A	136	5	3.68	0	0	#DIV/0!
I 10819920	intergenic	intergenic	N/A	130	19	14.62	0	0	#DIV/0!
I 10819921	intergenic	intergenic	N/A	130	24	18.46	0	0	#DIV/0!
I 10819930	intergenic	intergenic	N/A	129	6	4.65	0	0	#DIV/0!
I 10819942	intergenic	intergenic	N/A	119	4	3.36	0	0	#DIV/0!
I 10819949	intergenic	intergenic	N/A	116	12	10.34	0	0	#DIV/0!
I 10819953	intergenic	intergenic	N/A	112	4	3.57	0	0	#DIV/0!
I 10819954	intergenic	intergenic	N/A	111	8	7.21	0	0	#DIV/0!
I 10819955	intergenic	intergenic	N/A	111	19	17.12	0	0	#DIV/0!
I 10819956	intergenic	intergenic	N/A	111	12	10.81	0	0	#DIV/0!
I 10819958	intergenic	intergenic	N/A	110	20	18.18	0	0	#DIV/0!
I 10819965	intergenic	intergenic	N/A	100	4	4	0	0	#DIV/0!
I 10819966	intergenic	intergenic	N/A	98	13	13.27	0	0	#DIV/0!
I 10819992	intergenic	intergenic	N/A	77	9	11.69	0	0	#DIV/0!
I 10819997	intergenic	intergenic	N/A	73	10	13.7	0	0	#DIV/0!
I 10820023	intergenic	intergenic	N/A	58	11	18.97	0	0	#DIV/0!
I 10820030	intergenic	intergenic	N/A	52	7	13.46	0	0	#DIV/0!
I 10820048	intergenic	intergenic	N/A	41	8	19.51	0	0	#DIV/0!
I 10820126	intergenic	intergenic	N/A	67	3	4.48	0	0	#DIV/0!
I 10820131	intergenic	intergenic	N/A	67	3	4.48	0	0	#DIV/0!
I 10820133	intergenic	intergenic	N/A	68	4	5.88	0	0	#DIV/0!
I 10820136	intergenic	intergenic	N/A	68	2	2.94	0	0	#DIV/0!
I 10820141	intergenic	intergenic	N/A	69	4	5.8	0	0	#DIV/0!
I 10820150	intergenic	intergenic	N/A	73	6	8.22	0	0	#DIV/0!
I 10820158	intergenic	intergenic	N/A	81	6	7.41	0	0	#DIV/0!
I 10820159	intergenic	intergenic	N/A	82	3	3.66	0	0	#DIV/0!
I 10820178	intergenic	intergenic	N/A	89	2	2.25	0	0	#DIV/0!
I 10820187	intergenic	intergenic	N/A	90	5	5.56	0	0	#DIV/0!
I 10820193	intergenic	intergenic	N/A	88	2	2.27	0	0	#DIV/0!
I 10820203	intergenic	intergenic	N/A	99	5	5.05	0	0	#DIV/0!
I 10820204	intergenic	intergenic	N/A	98	9	9.18	0	0	#DIV/0!
I 10820207	intergenic	intergenic	N/A	98	6	6.12	0	0	#DIV/0!
I 10820211	intergenic	intergenic	N/A	98	2	2.04	0	0	#DIV/0!
I 10820218	intergenic	intergenic	N/A	97	2	2.06	0	0	#DIV/0!
I 10820227	intergenic	intergenic	N/A	100	9	9	0	0	#DIV/0!
I 10820237	intergenic	intergenic	N/A	101	3	2.97	0	0	#DIV/0!
I 10820254	intergenic	intergenic	N/A	92	4	4.35	0	0	#DIV/0!
I 10820255	intergenic	intergenic	N/A	91	5	5.49	0	0	#DIV/0!
I 10820260	intergenic	intergenic	N/A	85	9	10.59	0	0	#DIV/0!
I 10820271	intergenic	intergenic	N/A	86	3	3.49	0	0	#DIV/0!
I 10820272	intergenic	intergenic	N/A	88	5	5.68	0	0	#DIV/0!
I 10820273	intergenic	intergenic	N/A	91	7	7.69	0	0	#DIV/0!
I 10820282	intergenic	intergenic	N/A	97	3	3.09	0	0	#DIV/0!
I 10820283	intergenic	intergenic	N/A	96	6	6.25	0	0	#DIV/0!
I 10820285	intergenic	intergenic	N/A	97	13	13.4	5	1	20
I 10820290	intergenic	intergenic	N/A	97	9	9.28	0	0	#DIV/0!
I 10820291	intergenic	intergenic	N/A	97	4	4.12	0	0	#DIV/0!
I 10820295	intergenic	intergenic	N/A	99	3	3.03	0	0	#DIV/0!
I 10820299	intergenic	intergenic	N/A	101	4	3.96	0	0	#DIV/0!
I 10820305	intergenic	intergenic	N/A	95	4	4.21	0	0	#DIV/0!
I 10820322	intergenic	intergenic	N/A	96	2	2.08	0	0	#DIV/0!
I 10820324	intergenic	intergenic	N/A	93	3	3.23	0	0	#DIV/0!
I 10820325	intergenic	intergenic	N/A	93	4	4.3	0	0	#DIV/0!
I 10820336	intergenic	intergenic	N/A	98	3	3.06	0	0	#DIV/0!
I 10820337	intergenic	intergenic	N/A	97	7	7.22	0	0	#DIV/0!
I 10820338	intergenic	intergenic	N/A	97	6	6.19	0	0	#DIV/0!
I 10820358	intergenic	intergenic	N/A	91	4	4.4	0	0	#DIV/0!
I 10820360	intergenic	intergenic	N/A	89	2	2.25	0	0	#DIV/0!
I 10820376	intergenic	intergenic	N/A	89	9	10.11	0	0	#DIV/0!
I 10820381	intergenic	intergenic	N/A	93	5	5.38	0	0	#DIV/0!
I 10820382	intergenic	intergenic	N/A	93	5	5.38	0	0	#DIV/0!
I 10820383	intergenic	intergenic	N/A	93	5	5.38	0	0	#DIV/0!
I 10820397	intergenic	intergenic	N/A	91	4	4.4	0	0	#DIV/0!
I 10820403	intergenic	intergenic	N/A	94	9	9.57	0	0	#DIV/0!
I 10820405	intergenic	intergenic	N/A	93	3	3.23	0	0	#DIV/0!
I 10820410	intergenic	intergenic	N/A	95	4	4.21	0	0	#DIV/0!
I 10820411	intergenic	intergenic	N/A	95	4	4.21	0	0	#DIV/0!
I 10820441	intergenic	intergenic	N/A	94	9	9.57	0	0	#DIV/0!
I 10820450	intergenic	intergenic	N/A	97	3	3.09	0	0	#DIV/0!
I 10820451	intergenic	intergenic	N/A	95	7	7.37	0	0	#DIV/0!
I 10820456	intergenic	intergenic	N/A	97	4	4.12	0	0	#DIV/0!
I 10820459	intergenic	intergenic	N/A	97	6	6.19	11	1	9.09091
I 10820469	intergenic	intergenic	N/A	102	13	12.75	0	0	#DIV/0!
I 10820484	intergenic	intergenic	N/A	101	9	8.91	0	0	#DIV/0!
I 10820492	intergenic	intergenic	N/A	108	16	14.81	0	0	#DIV/0!
I 10820493	intergenic	intergenic	N/A	107	19	17.76	0	0	#DIV/0!
I 10820494	intergenic	intergenic	N/A	108	21	19.44	0	0	#DIV/0!
I 10820495	intergenic	intergenic	N/A	109	4	3.67	0	0	#DIV/0!
I 10820497	intergenic	intergenic	N/A	107	9	8.41	14	1	7.14286
I 10820511	intergenic	intergenic	N/A	103	20	19.42	0	0	#DIV/0!
I 10820520	intergenic	intergenic	N/A	108	6	5.56	0	0	#DIV/0!
I 10820532	intergenic	intergenic	N/A	117	13	11.11	0	0	#DIV/0!
I 10820534	intergenic	intergenic	N/A	120	18	15	0	0	#DIV/0!
I 10820554	intergenic	intergenic	N/A	143	15	10.49	0	0	#DIV/0!
I 10820575	intergenic	intergenic	N/A	162	4	2.47	0	0	#DIV/0!
I 10820577	intergenic	intergenic	N/A	162	5	3.09	0	0	#DIV/0!
I 10820585	intergenic	intergenic	N/A	162	13	8.02	0	0	#DIV/0!
I 10820607	intergenic	intergenic	N/A	156	4	2.56	0	0	#DIV/0!
I 10820608	intergenic	intergenic	N/A	156	3	1.92	0	0	#DIV/0!
I 10820611	intergenic	intergenic	N/A	157	8	5.1	0	0	#DIV/0!
I 10820615	intergenic	intergenic	N/A	157	3	1.91	0	0	#DIV/0!
I 10820616	intergenic	intergenic	N/A	155	22	14.19	16	6	37.5
I 10820617	intergenic	intergenic	N/A	154	5	3.25	0	0	#DIV/0!
I 10820618	intergenic	intergenic	N/A	154	3	1.95	0	0	#DIV/0!
I 10820626	intergenic	intergenic	N/A	157	3	1.91	0	0	#DIV/0!
I 10820627	intergenic	intergenic	N/A	159	4	2.52	0	0	#DIV/0!
I 10820656	intergenic	intergenic	N/A	170	4	2.35	0	0	#DIV/0!
I 10820685	intergenic	intergenic	N/A	172	3	1.74	0	0	#DIV/0!
I 10820689	intergenic	intergenic	N/A	173	3	1.73	0	0	#DIV/0!
I 10820711	intergenic	intergenic	N/A	163	5	3.07	0	0	#DIV/0!
I 10820716	intergenic	intergenic	N/A	161	7	4.35	0	0	#DIV/0!
I 10820734	intergenic	intergenic	N/A	156	3	1.92	0	0	#DIV/0!
I 10820740	intergenic	intergenic	N/A	151	7	4.64	0	0	#DIV/0!
I 10820741	intergenic	intergenic	N/A	151	3	1.99	0	0	#DIV/0!
I 10820757	intergenic	intergenic	N/A	137	5	3.65	0	0	#DIV/0!
I 10820761	intergenic	intergenic	N/A	133	4	3.01	0	0	#DIV/0!
I 10820771	intergenic	intergenic	N/A	129	6	4.65	0	0	#DIV/0!
I 10820775	intergenic	intergenic	N/A	128	7	5.47	0	0	#DIV/0!
I 10820780	intergenic	intergenic	N/A	126	4	3.17	0	0	#DIV/0!
I 10820787	intergenic	intergenic	N/A	124	4	3.23	0	0	#DIV/0!
I 10820790	intergenic	intergenic	N/A	122	5	4.1	0	0	#DIV/0!
I 10820795	intergenic	intergenic	N/A	117	8	6.84	0	0	#DIV/0!
I 10820813	intergenic	intergenic	N/A	108	4	3.7	0	0	#DIV/0!
I 10820818	intergenic	intergenic	N/A	101	5	4.95	0	0	#DIV/0!
I 10820873	intergenic	intergenic	N/A	86	4	4.65	0	0	#DIV/0!
I 10820911	intergenic	intergenic	N/A	82	3	3.66	0	0	#DIV/0!
I 10820965	intergenic	intergenic	N/A	76	3	3.95	0	0	#DIV/0!
I 11682964	intergenic	intergenic	N/A	11	2	18.18	0	0	#DIV/0!
I 11924696	three_prime_utr	WBGene00006958	wve-1	26	6	23.08	10	2	20
I 11924698	three_prime_utr	WBGene00006958	wve-1	26	18	69.23	10	8	80
I 11924699	three_prime_utr	WBGene00006958	wve-1	26	3	11.54	10	4	40
I 11924723	three_prime_utr	WBGene00006958	wve-1	24	6	25	8	5	62.5
I 11924724	three_prime_utr	WBGene00006958	wve-1	24	3	12.5	7	3	42.8571
I 11924734	three_prime_utr	WBGene00006958	wve-1	21	5	23.81	5	4	80
I 12480302	intergenic	intergenic	N/A	10	2	20	0	0	#DIV/0!
I 12809689	five_prime_utr	WBGene00012475	Y18D10A.2	9	4	44.44	3	3	100
I 12809698	five_prime_utr	WBGene00012475	Y18D10A.2	10	3	30	2	2	100
I 12809700	five_prime_utr	WBGene00012475	Y18D10A.2	10	3	30	2	2	100
I 12809725	five_prime_utr	WBGene00012475	Y18D10A.2	7	5	71.43	0	0	#DIV/0!
I 12809807	five_prime_utr	WBGene00012475	Y18D10A.2	9	2	22.22	1	1	100
I 12809817	five_prime_utr	WBGene00012475	Y18D10A.2	10	3	30	0	0	#DIV/0!
I 12809819	five_prime_utr	WBGene00012475	Y18D10A.2	10	2	20	1	1	100
I 12809823	five_prime_utr	WBGene00012475	Y18D10A.2	10	3	30	0	0	#DIV/0!
I 12809832	five_prime_utr	WBGene00012475	Y18D10A.2	9	5	55.56	0	0	#DIV/0!
I 12809841	five_prime_utr	WBGene00012475	Y18D10A.2	9	7	77.78	0	0	#DIV/0!
I 12809854	five_prime_utr	WBGene00012475	Y18D10A.2	9	3	33.33	0	0	#DIV/0!
I 12809857	five_prime_utr	WBGene00012475	Y18D10A.2	9	3	33.33	0	0	#DIV/0!
I 12809861	five_prime_utr	WBGene00012475	Y18D10A.2	9	2	22.22	2	2	100
I 12809862	five_prime_utr	WBGene00012475	Y18D10A.2	9	6	66.67	2	2	100
I 12809893	five_prime_utr	WBGene00012475	Y18D10A.2	13	2	15.38	0	0	#DIV/0!
I 12809900	five_prime_utr	WBGene00012475	Y18D10A.2	13	3	23.08	3	3	100
I 12809905	five_prime_utr	WBGene00012475	Y18D10A.2	13	8	61.54	0	0	#DIV/0!
I 12809915	five_prime_utr	WBGene00012475	Y18D10A.2	14	9	64.29	3	3	100
I 12809916	five_prime_utr	WBGene00012475	Y18D10A.2	14	4	28.57	0	0	#DIV/0!
I 12809922	five_prime_utr	WBGene00012475	Y18D10A.2	14	2	14.29	0	0	#DIV/0!
I 12809925	five_prime_utr	WBGene00012475	Y18D10A.2	12	7	58.33	3	3	100
I 12809926	five_prime_utr	WBGene00012475	Y18D10A.2	11	10	90.91	3	3	100
I 12809937	five_prime_utr	WBGene00012475	Y18D10A.2	10	3	30	0	0	#DIV/0!
I 12809960	five_prime_utr	WBGene00012475	Y18D10A.2	10	5	50	2	2	100
I 12809977	five_prime_utr	WBGene00012475	Y18D10A.2	12	2	16.67	0	0	#DIV/0!
I 12809982	five_prime_utr	WBGene00012475	Y18D10A.2	12	4	33.33	0	0	#DIV/0!
I 12809986	five_prime_utr	WBGene00012475	Y18D10A.2	12	2	16.67	0	0	#DIV/0!
I 13360280	three_prime_utr	WBGene00012735	sptf-3	5	3	60	3	2	66.6667
I 13777786	intergenic	intergenic	N/A	14	2	14.29	0	0	#DIV/0!
I 13777791	intergenic	intergenic	N/A	14	2	14.29	0	0	#DIV/0!
I 14341320	three_prime_utr	WBGene00013666	Y105E8A.1	12	4	33.33	0	0	#DIV/0!
I 14855828	intergenic	intergenic	N/A	168	13	7.74	0	0	#DIV/0!
I 14855835	intergenic	intergenic	N/A	164	4	2.44	0	0	#DIV/0!
I 14855843	intergenic	intergenic	N/A	165	4	2.42	0	0	#DIV/0!
I 14855848	intergenic	intergenic	N/A	170	14	8.24	0	0	#DIV/0!
I 14855855	intergenic	intergenic	N/A	168	11	6.55	0	0	#DIV/0!
I 14855860	intergenic	intergenic	N/A	165	8	4.85	0	0	#DIV/0!
I 14855870	intergenic	intergenic	N/A	156	4	2.56	0	0	#DIV/0!
I 14855874	intergenic	intergenic	N/A	153	5	3.27	0	0	#DIV/0!
I 14855888	intergenic	intergenic	N/A	148	9	6.08	0	0	#DIV/0!
I 14855891	intergenic	intergenic	N/A	148	16	10.81	0	0	#DIV/0!
II 750473	intergenic	intergenic	N/A	6	2	33.33	0	0	#DIV/0!
II 750484	intergenic	intergenic	N/A	6	2	33.33	0	0	#DIV/0!
II 750498	intergenic	intergenic	N/A	6	3	50	0	0	#DIV/0!
II 1358012	five_prime_utr	WBGene00015729	C13A10.2	13	5	38.46	1	1	100
II 1358560	intergenic	intergenic	N/A	14	2	14.29	0	0	#DIV/0!
II 1358726	intergenic	intergenic	N/A	16	2	12.5	0	0	#DIV/0!
II 2180725	intergenic	intergenic	N/A	37	2	5.41	0	0	#DIV/0!
II 2285307	five_prime_utr	WBGene00019592	K09F6.9	8	2	25	0	0	#DIV/0!
II 2285321	five_prime_utr	WBGene00019592	K09F6.9	9	3	33.33	0	0	#DIV/0!
II 8860172	three_prime_utr	WBGene00011578	npr-20	6	3	50	0	0	#DIV/0!
II 8860173	three_prime_utr	WBGene00011578	npr-20	7	2	28.57	0	0	#DIV/0!
II 8860198	three_prime_utr	WBGene00011578	npr-20	11	3	27.27	0	0	#DIV/0!
II 8860203	three_prime_utr	WBGene00011578	npr-20	10	7	70	0	0	#DIV/0!
II 8860204	three_prime_utr	WBGene00011578	npr-20	10	9	90	2	2	100
II 8860207	three_prime_utr	WBGene00011578	npr-20	10	4	40	2	2	100
II 8860216	three_prime_utr	WBGene00011578	npr-20	10	2	20	0	0	#DIV/0!
II 8860220	three_prime_utr	WBGene00011578	npr-20	10	3	30	3	2	66.6667
II 8860231	three_prime_utr	WBGene00011578	npr-20	10	9	90	3	2	66.6667
II 8860240	three_prime_utr	WBGene00011578	npr-20	11	7	63.64	4	4	100
II 8860256	three_prime_utr	WBGene00011578	npr-20	13	4	30.77	4	3	75
II 8860269	three_prime_utr	WBGene00011578	npr-20	14	4	28.57	3	1	33.3333
II 8860284	three_prime_utr	WBGene00011578	npr-20	16	3	18.75	3	1	33.3333
II 8860305	three_prime_utr	WBGene00011578	npr-20	16	3	18.75	1	1	100
II 8860310	three_prime_utr	WBGene00011578	npr-20	14	10	71.43	1	1	100
II 8860317	three_prime_utr	WBGene00011578	npr-20	12	5	41.67	0	0	#DIV/0!
II 8860343	three_prime_utr	WBGene00011578	npr-20	11	5	45.45	0	0	#DIV/0!
II 8860353	three_prime_utr	WBGene00011578	npr-20	12	3	25	0	0	#DIV/0!
II 8860365	three_prime_utr	WBGene00011578	npr-20	10	2	20	0	0	#DIV/0!
II 8860368	three_prime_utr	WBGene00011578	npr-20	10	6	60	0	0	#DIV/0!
II 8860369	three_prime_utr	WBGene00011578	npr-20	10	2	20	0	0	#DIV/0!
II 8860392	three_prime_utr	WBGene00011578	npr-20	9	5	55.56	0	0	#DIV/0!
II 8860393	three_prime_utr	WBGene00011578	npr-20	9	2	22.22	0	0	#DIV/0!
II 8860395	three_prime_utr	WBGene00011578	npr-20	9	8	88.89	0	0	#DIV/0!
II 8860407	three_prime_utr	WBGene00011578	npr-20	9	3	33.33	0	0	#DIV/0!
II 8860416	three_prime_utr	WBGene00011578	npr-20	9	3	33.33	0	0	#DIV/0!
II 8860417	three_prime_utr	WBGene00011578	npr-20	9	5	55.56	0	0	#DIV/0!
II 8860418	three_prime_utr	WBGene00011578	npr-20	9	5	55.56	0	0	#DIV/0!
II 8860425	three_prime_utr	WBGene00011578	npr-20	9	2	22.22	0	0	#DIV/0!
II 8860432	three_prime_utr	WBGene00011578	npr-20	7	4	57.14	0	0	#DIV/0!
II 8860491	three_prime_utr	WBGene00011578	npr-20	6	3	50	0	0	#DIV/0!
II 8860541	three_prime_utr	WBGene00011578	npr-20	12	6	50	0	0	#DIV/0!
II 8860579	three_prime_utr	WBGene00011578	npr-20	18	10	55.56	0	0	#DIV/0!
II 8860581	three_prime_utr	WBGene00011578	npr-20	18	6	33.33	0	0	#DIV/0!
II 8860582	three_prime_utr	WBGene00011578	npr-20	18	10	55.56	0	0	#DIV/0!
II 8860583	three_prime_utr	WBGene00011578	npr-20	18	13	72.22	1	1	100
II 8860592	three_prime_utr	WBGene00011578	npr-20	19	6	31.58	0	0	#DIV/0!
II 8860619	three_prime_utr	WBGene00011578	npr-20	22	4	18.18	0	0	#DIV/0!
II 8860626	three_prime_utr	WBGene00011578	npr-20	22	7	31.82	2	2	100
II 8860629	three_prime_utr	WBGene00011578	npr-20	21	5	23.81	0	0	#DIV/0!
II 8860630	three_prime_utr	WBGene00011578	npr-20	21	6	28.57	0	0	#DIV/0!
II 8860640	three_prime_utr	WBGene00011578	npr-20	22	17	77.27	3	3	100
II 8860646	three_prime_utr	WBGene00011578	npr-20	21	5	23.81	0	0	#DIV/0!
II 8860656	three_prime_utr	WBGene00011578	npr-20	20	8	40	0	0	#DIV/0!
II 8860666	three_prime_utr	WBGene00011578	npr-20	15	2	13.33	0	0	#DIV/0!
II 8860667	three_prime_utr	WBGene00011578	npr-20	14	6	42.86	0	0	#DIV/0!
II 8860668	three_prime_utr	WBGene00011578	npr-20	13	10	76.92	0	0	#DIV/0!
II 8860669	three_prime_utr	WBGene00011578	npr-20	13	9	69.23	2	2	100
II 8860693	three_prime_utr	WBGene00011578	npr-20	9	8	88.89	1	1	100
II 8860702	three_prime_utr	WBGene00011578	npr-20	9	3	33.33	0	0	#DIV/0!
II 8860705	three_prime_utr	WBGene00011578	npr-20	9	6	66.67	0	0	#DIV/0!
II 9429550	intergenic	intergenic	N/A	9	2	22.22	0	0	#DIV/0!
II 9429554	intergenic	intergenic	N/A	9	2	22.22	0	0	#DIV/0!
II 9429570	intergenic	intergenic	N/A	9	2	22.22	0	0	#DIV/0!
II 9429582	intergenic	intergenic	N/A	7	2	28.57	0	0	#DIV/0!
II 9429585	intergenic	intergenic	N/A	8	2	25	0	0	#DIV/0!
II 9429587	intergenic	intergenic	N/A	8	2	25	0	0	#DIV/0!
II 9429593	intergenic	intergenic	N/A	8	2	25	0	0	#DIV/0!
II 9429598	intergenic	intergenic	N/A	8	2	25	0	0	#DIV/0!
II 9429599	intergenic	intergenic	N/A	8	2	25	0	0	#DIV/0!
II 9429600	intergenic	intergenic	N/A	8	2	25	0	0	#DIV/0!
II 10844179	three_prime_utr	WBGene00010910	M106.2	28	4	14.29	3	2	66.6667
II 10844187	three_prime_utr	WBGene00010910	M106.2	31	4	12.9	1	1	100
II 10844203	three_prime_utr	WBGene00010910	M106.2	37	5	13.51	4	1	25
II 10844211	three_prime_utr	WBGene00010910	M106.2	40	4	10	0	0	#DIV/0!
II 10844224	three_prime_utr	WBGene00010910	M106.2	36	21	58.33	7	3	42.8571
II 10876295	intergenic	intergenic	N/A	43	2	4.65	1	1	100
II 10876302	intergenic	intergenic	N/A	45	2	4.44	1	1	100
II 10876308	intergenic	intergenic	N/A	43	2	4.65	0	0	#DIV/0!
II 10876316	intergenic	intergenic	N/A	41	2	4.88	0	0	#DIV/0!
II 12496706	intergenic	intergenic	N/A	5	2	40	0	0	#DIV/0!
II 12496716	intergenic	intergenic	N/A	5	4	80	0	0	#DIV/0!
II 13013215	intron	WBGene00008932	F18A11.5	13	4	30.77	0	0	#DIV/0!
II 13321493	three_prime_utr	WBGene00012990	sam-10	16	2	12.5	0	0	#DIV/0!
II 14256227	three_prime_utr	WBGene00235256	Y54G11A.19	12	3	25	0	0	#DIV/0!
II 14346721	three_prime_utr	WBGene00002996	lin-7	31	11	35.48	2	1	50
II 14346759	three_prime_utr	WBGene00002996	lin-7	21	4	19.05	2	1	50
II 14346764	three_prime_utr	WBGene00002996	lin-7	20	13	65	2	2	100
II 14346767	three_prime_utr	WBGene00002996	lin-7	20	13	65	2	1	50
II 14346778	three_prime_utr	WBGene00002996	lin-7	19	3	15.79	0	0	#DIV/0!
II 14346780	three_prime_utr	WBGene00002996	lin-7	18	11	61.11	0	0	#DIV/0!
II 14346796	three_prime_utr	WBGene00002996	lin-7	17	3	17.65	0	0	#DIV/0!
III 334601	intron	WBGene00021756	Y50D7A.8	10	2	20	0	0	#DIV/0!
III 334605	intron	WBGene00021756	Y50D7A.8	10	2	20	0	0	#DIV/0!
III 464682	three_prime_utr	WBGene00021914	magu-1	17	3	17.65	0	0	#DIV/0!
III 464695	three_prime_utr	WBGene00021914	magu-1	12	2	16.67	0	0	#DIV/0!
III 464711	three_prime_utr	WBGene00021914	magu-1	11	2	18.18	0	0	#DIV/0!
III 1061254	intergenic	intergenic	N/A	5	2	40	0	0	#DIV/0!
III 1062009	intergenic	intergenic	N/A	7	2	28.57	0	0	#DIV/0!
III 1062033	intergenic	intergenic	N/A	7	2	28.57	0	0	#DIV/0!
III 1062034	intergenic	intergenic	N/A	7	4	57.14	0	0	#DIV/0!
III 1062043	intergenic	intergenic	N/A	6	3	50	0	0	#DIV/0!
III 1062044	intergenic	intergenic	N/A	6	5	83.33	0	0	#DIV/0!
III 1062056	intergenic	intergenic	N/A	6	5	83.33	0	0	#DIV/0!
III 1062097	intergenic	intergenic	N/A	5	3	60	0	0	#DIV/0!
III 1062098	intergenic	intergenic	N/A	5	3	60	0	0	#DIV/0!
III 1062507	intergenic	intergenic	N/A	5	2	40	0	0	#DIV/0!
III 1062582	intergenic	intergenic	N/A	5	2	40	0	0	#DIV/0!
III 1062586	intergenic	intergenic	N/A	5	3	60	0	0	#DIV/0!
III 1062587	intergenic	intergenic	N/A	5	4	80	0	0	#DIV/0!
III 1062588	intergenic	intergenic	N/A	5	3	60	0	0	#DIV/0!
III 1062632	intergenic	intergenic	N/A	6	2	33.33	0	0	#DIV/0!
III 1230386	intergenic	intergenic	N/A	8	2	25	0	0	#DIV/0!
III 1230436	intergenic	intergenic	N/A	5	3	60	0	0	#DIV/0!
III 1230461	intergenic	intergenic	N/A	5	2	40	0	0	#DIV/0!
III 1230587	intergenic	intergenic	N/A	6	2	33.33	0	0	#DIV/0!
III 1230588	intergenic	intergenic	N/A	6	5	83.33	0	0	#DIV/0!
III 2571633	intergenic	intergenic	N/A	12	7	58.33	0	0	#DIV/0!
III 2571958	intergenic	intergenic	N/A	7	2	28.57	0	0	#DIV/0!
III 2599688	intergenic	intergenic	N/A	19	9	47.37	0	0	#DIV/0!
III 2599703	intergenic	intergenic	N/A	18	5	27.78	0	0	#DIV/0!
III 2599704	intergenic	intergenic	N/A	18	4	22.22	0	0	#DIV/0!
III 2599709	intergenic	intergenic	N/A	18	6	33.33	0	0	#DIV/0!
III 2600402	intergenic	intergenic	N/A	6	2	33.33	0	0	#DIV/0!
III 3080937	intergenic	intergenic	N/A	6	2	33.33	0	0	#DIV/0!
III 3080941	intergenic	intergenic	N/A	6	2	33.33	0	0	#DIV/0!
III 3080949	intergenic	intergenic	N/A	6	2	33.33	0	0	#DIV/0!
III 3080964	intergenic	intergenic	N/A	5	2	40	0	0	#DIV/0!
III 3080997	intergenic	intergenic	N/A	6	4	66.67	0	0	#DIV/0!
III 3081005	intergenic	intergenic	N/A	7	5	71.43	0	0	#DIV/0!
III 3081006	intergenic	intergenic	N/A	7	3	42.86	0	0	#DIV/0!
III 3081023	intergenic	intergenic	N/A	7	2	28.57	0	0	#DIV/0!
III 3081024	intergenic	intergenic	N/A	7	3	42.86	0	0	#DIV/0!
III 3081058	intergenic	intergenic	N/A	6	2	33.33	0	0	#DIV/0!
III 3081063	intergenic	intergenic	N/A	6	3	50	0	0	#DIV/0!
III 3081081	intergenic	intergenic	N/A	7	3	42.86	0	0	#DIV/0!
III 3081088	intergenic	intergenic	N/A	9	2	22.22	0	0	#DIV/0!
III 3081107	intergenic	intergenic	N/A	10	2	20	0	0	#DIV/0!
III 3081128	intergenic	intergenic	N/A	12	3	25	0	0	#DIV/0!
III 3081129	intergenic	intergenic	N/A	12	5	41.67	0	0	#DIV/0!
III 3081141	intergenic	intergenic	N/A	12	2	16.67	0	0	#DIV/0!
III 3088770	intergenic	intergenic	N/A	7	2	28.57	0	0	#DIV/0!
III 3088797	intergenic	intergenic	N/A	8	3	37.5	0	0	#DIV/0!
III 3088806	intergenic	intergenic	N/A	8	4	50	0	0	#DIV/0!
III 10904517	intergenic	intergenic	N/A	48	3	6.25	0	0	#DIV/0!
III 10904545	intergenic	intergenic	N/A	63	3	4.76	0	0	#DIV/0!
III 10904546	intergenic	intergenic	N/A	64	3	4.69	0	0	#DIV/0!
III 10904766	intergenic	intergenic	N/A	60	3	5	0	0	#DIV/0!
III 10904778	intergenic	intergenic	N/A	61	3	4.92	0	0	#DIV/0!
III 10904784	intergenic	intergenic	N/A	63	3	4.76	0	0	#DIV/0!
III 10904819	intergenic	intergenic	N/A	63	4	6.35	0	0	#DIV/0!
III 10904872	intergenic	intergenic	N/A	70	4	5.71	0	0	#DIV/0!
III 10904873	intergenic	intergenic	N/A	71	3	4.23	0	0	#DIV/0!
III 10904878	intergenic	intergenic	N/A	70	4	5.71	0	0	#DIV/0!
III 10904888	intergenic	intergenic	N/A	77	3	3.9	0	0	#DIV/0!
III 10905180	intergenic	intergenic	N/A	70	3	4.29	0	0	#DIV/0!
III 10905523	intergenic	intergenic	N/A	82	3	3.66	0	0	#DIV/0!
III 10905608	intergenic	intergenic	N/A	62	3	4.84	1	1	100
III 10905658	intergenic	intergenic	N/A	44	3	6.82	0	0	#DIV/0!
III 10905668	intergenic	intergenic	N/A	41	2	4.88	0	0	#DIV/0!
III 10905701	intergenic	intergenic	N/A	34	2	5.88	0	0	#DIV/0!
III 10905702	intergenic	intergenic	N/A	34	3	8.82	0	0	#DIV/0!
III 10905993	intergenic	intergenic	N/A	12	2	16.67	0	0	#DIV/0!
III 10905994	intergenic	intergenic	N/A	12	2	16.67	0	0	#DIV/0!
III 10906026	intergenic	intergenic	N/A	20	2	10	0	0	#DIV/0!
III 10906033	intergenic	intergenic	N/A	22	2	9.09	0	0	#DIV/0!
III 10906039	intergenic	intergenic	N/A	24	3	12.5	0	0	#DIV/0!
III 10906049	intergenic	intergenic	N/A	27	3	11.11	0	0	#DIV/0!
III 10906050	intergenic	intergenic	N/A	28	3	10.71	0	0	#DIV/0!
III 10906053	intergenic	intergenic	N/A	30	4	13.33	0	0	#DIV/0!
III 10906097	intergenic	intergenic	N/A	47	3	6.38	0	0	#DIV/0!
III 10906107	intergenic	intergenic	N/A	50	3	6	0	0	#DIV/0!
III 10906157	intergenic	intergenic	N/A	59	3	5.08	0	0	#DIV/0!
III 10906180	intergenic	intergenic	N/A	56	3	5.36	0	0	#DIV/0!
III 10906183	intergenic	intergenic	N/A	55	3	5.45	0	0	#DIV/0!
III 10906193	intergenic	intergenic	N/A	54	3	5.56	0	0	#DIV/0!
III 10906231	intergenic	intergenic	N/A	46	2	4.35	0	0	#DIV/0!
III 10906335	intergenic	intergenic	N/A	66	2	3.03	0	0	#DIV/0!
III 10906362	intergenic	intergenic	N/A	60	2	3.33	0	0	#DIV/0!
III 10906407	intergenic	intergenic	N/A	44	3	6.82	0	0	#DIV/0!
III 10907360	intergenic	intergenic	N/A	52	3	5.77	0	0	#DIV/0!
III 10907381	intergenic	intergenic	N/A	50	4	8	0	0	#DIV/0!
III 10907786	intergenic	intergenic	N/A	178	4	2.25	0	0	#DIV/0!
III 10907811	intergenic	intergenic	N/A	161	8	4.97	16	1	6.25
III 10907841	intergenic	intergenic	N/A	157	4	2.55	0	0	#DIV/0!
III 10908615	intergenic	intergenic	N/A	16	2	12.5	0	0	#DIV/0!
III 11557725	intergenic	intergenic	N/A	5	3	60	7	7	100
III 11961145	three_prime_utr	WBGene00013240	Y56A3A.28	16	2	12.5	0	0	#DIV/0!
III 11961161	three_prime_utr	WBGene00013240	Y56A3A.28	13	3	23.08	1	1	100
III 11961162	three_prime_utr	WBGene00013240	Y56A3A.28	13	6	46.15	0	0	#DIV/0!
III 12670837	three_prime_utr	WBGene00006389	taf-7.2	7	3	42.86	0	0	#DIV/0!
III 12670847	three_prime_utr	WBGene00006389	taf-7.2	7	2	28.57	0	0	#DIV/0!
III 12670865	three_prime_utr	WBGene00006389	taf-7.2	7	2	28.57	0	0	#DIV/0!
III 13142404	three_prime_utr	WBGene00012719	Y39E4B.10	24	4	16.67	1	1	100
III 13142418	three_prime_utr	WBGene00012719	Y39E4B.10	18	10	55.56	0	0	#DIV/0!
III 13142423	three_prime_utr	WBGene00012719	Y39E4B.10	17	4	23.53	0	0	#DIV/0!
III 13142424	three_prime_utr	WBGene00012719	Y39E4B.10	17	7	41.18	0	0	#DIV/0!
III 13142497	three_prime_utr	WBGene00012719	Y39E4B.10	7	2	28.57	0	0	#DIV/0!
III 13142498	three_prime_utr	WBGene00012719	Y39E4B.10	7	3	42.86	0	0	#DIV/0!
III 13142517	three_prime_utr	WBGene00012719	Y39E4B.10	12	4	33.33	1	1	100
III 13142529	three_prime_utr	WBGene00012719	Y39E4B.10	13	4	30.77	1	1	100
III 13142530	three_prime_utr	WBGene00012719	Y39E4B.10	13	4	30.77	0	0	#DIV/0!
III 13142611	three_prime_utr	WBGene00012719	Y39E4B.10	24	3	12.5	0	0	#DIV/0!
III 13142620	three_prime_utr	WBGene00012719	Y39E4B.10	24	3	12.5	0	0	#DIV/0!
III 13142622	three_prime_utr	WBGene00012719	Y39E4B.10	24	4	16.67	1	1	100
III 13142623	three_prime_utr	WBGene00012719	Y39E4B.10	24	12	50	1	1	100
III 13142624	three_prime_utr	WBGene00012719	Y39E4B.10	24	14	58.33	1	1	100
III 13142625	three_prime_utr	WBGene00012719	Y39E4B.10	23	5	21.74	0	0	#DIV/0!
III 13142626	three_prime_utr	WBGene00012719	Y39E4B.10	24	5	20.83	0	0	#DIV/0!
III 13142641	three_prime_utr	WBGene00012719	Y39E4B.10	24	9	37.5	2	2	100
III 13142642	three_prime_utr	WBGene00012719	Y39E4B.10	24	4	16.67	1	1	100
III 13142646	three_prime_utr	WBGene00012719	Y39E4B.10	24	4	16.67	1	1	100
III 13142647	three_prime_utr	WBGene00012719	Y39E4B.10	24	11	45.83	1	1	100
III 13142654	three_prime_utr	WBGene00012719	Y39E4B.10	26	8	30.77	0	0	#DIV/0!
III 13142656	three_prime_utr	WBGene00012719	Y39E4B.10	26	10	38.46	0	0	#DIV/0!
III 13142666	three_prime_utr	WBGene00012719	Y39E4B.10	23	5	21.74	0	0	#DIV/0!
III 13142672	three_prime_utr	WBGene00012719	Y39E4B.10	23	8	34.78	0	0	#DIV/0!
III 13142698	three_prime_utr	WBGene00012719	Y39E4B.10	19	17	89.47	0	0	#DIV/0!
III 13142708	three_prime_utr	WBGene00012719	Y39E4B.10	19	14	73.68	0	0	#DIV/0!
III 13142712	three_prime_utr	WBGene00012719	Y39E4B.10	19	8	42.11	0	0	#DIV/0!
III 13142724	three_prime_utr	WBGene00012719	Y39E4B.10	19	3	15.79	0	0	#DIV/0!
III 13142737	three_prime_utr	WBGene00012719	Y39E4B.10	14	4	28.57	0	0	#DIV/0!
III 13142740	three_prime_utr	WBGene00012719	Y39E4B.10	13	7	53.85	0	0	#DIV/0!
III 13142745	three_prime_utr	WBGene00012719	Y39E4B.10	14	2	14.29	0	0	#DIV/0!
III 13142749	three_prime_utr	WBGene00012719	Y39E4B.10	14	7	50	0	0	#DIV/0!
III 13142753	three_prime_utr	WBGene00012719	Y39E4B.10	14	9	64.29	0	0	#DIV/0!
III 13142754	three_prime_utr	WBGene00012719	Y39E4B.10	14	9	64.29	0	0	#DIV/0!
III 13142760	three_prime_utr	WBGene00012719	Y39E4B.10	15	3	20	0	0	#DIV/0!
III 13142761	three_prime_utr	WBGene00012719	Y39E4B.10	14	7	50	0	0	#DIV/0!
III 13142773	three_prime_utr	WBGene00012719	Y39E4B.10	13	4	30.77	0	0	#DIV/0!
III 13142786	three_prime_utr	WBGene00012719	Y39E4B.10	12	3	25	0	0	#DIV/0!
III 13142787	three_prime_utr	WBGene00012719	Y39E4B.10	11	3	27.27	0	0	#DIV/0!
III 13142791	three_prime_utr	WBGene00012719	Y39E4B.10	11	9	81.82	0	0	#DIV/0!
III 13142795	three_prime_utr	WBGene00012719	Y39E4B.10	11	2	18.18	0	0	#DIV/0!
III 13142806	three_prime_utr	WBGene00012719	Y39E4B.10	11	10	90.91	0	0	#DIV/0!
III 13142826	three_prime_utr	WBGene00012719	Y39E4B.10	10	2	20	0	0	#DIV/0!
III 13142827	three_prime_utr	WBGene00012719	Y39E4B.10	10	2	20	0	0	#DIV/0!
III 13143088	three_prime_utr	WBGene00012719	Y39E4B.10	20	17	85	0	0	#DIV/0!
III 13143096	three_prime_utr	WBGene00012719	Y39E4B.10	20	3	15	0	0	#DIV/0!
III 13143150	three_prime_utr	WBGene00012719	Y39E4B.10	11	7	63.64	0	0	#DIV/0!
III 13143155	three_prime_utr	WBGene00012719	Y39E4B.10	11	2	18.18	1	1	100
III 13143177	three_prime_utr	WBGene00012719	Y39E4B.10	14	2	14.29	0	0	#DIV/0!
III 13143208	three_prime_utr	WBGene00012719	Y39E4B.10	23	12	52.17	3	2	66.6667
III 13143209	three_prime_utr	WBGene00012719	Y39E4B.10	23	9	39.13	4	4	100
III 13143234	three_prime_utr	WBGene00012719	Y39E4B.10	22	3	13.64	0	0	#DIV/0!
III 13143245	three_prime_utr	WBGene00012719	Y39E4B.10	22	4	18.18	3	2	66.6667
III 13143246	three_prime_utr	WBGene00012719	Y39E4B.10	22	14	63.64	3	2	66.6667
III 13143253	three_prime_utr	WBGene00012719	Y39E4B.10	22	4	18.18	0	0	#DIV/0!
III 13143270	three_prime_utr	WBGene00012719	Y39E4B.10	24	6	25	3	1	33.3333
III 13143275	three_prime_utr	WBGene00012719	Y39E4B.10	22	14	63.64	3	1	33.3333
III 13143299	three_prime_utr	WBGene00012719	Y39E4B.10	22	4	18.18	0	0	#DIV/0!
III 13143301	three_prime_utr	WBGene00012719	Y39E4B.10	22	16	72.73	2	2	100
III 13355847	three_prime_utr	WBGene00009953	F53A2.9	13	2	15.38	0	0	#DIV/0!
III 13355861	three_prime_utr	WBGene00009953	F53A2.9	13	2	15.38	0	0	#DIV/0!
III 13355880	three_prime_utr	WBGene00009953	F53A2.9	16	3	18.75	1	1	100
III 13355892	three_prime_utr	WBGene00009953	F53A2.9	13	3	23.08	1	1	100
III 13355893	three_prime_utr	WBGene00009953	F53A2.9	13	12	92.31	2	2	100
III 13356048	three_prime_utr	WBGene00009953	F53A2.9	9	2	22.22	6	3	50
III 13356063	three_prime_utr	WBGene00009953	F53A2.9	8	4	50	5	5	100
III 13356073	three_prime_utr	WBGene00009953	F53A2.9	8	2	25	7	7	100
IV 826577	intergenic	intergenic	N/A	5	2	40	0	0	#DIV/0!
IV 826579	intergenic	intergenic	N/A	5	3	60	0	0	#DIV/0!
IV 1001039	intergenic	intergenic	N/A	9	2	22.22	0	0	#DIV/0!
IV 1001050	intergenic	intergenic	N/A	8	2	25	0	0	#DIV/0!
IV 1001064	intergenic	intergenic	N/A	9	4	44.44	0	0	#DIV/0!
IV 1762069	intergenic	intergenic	N/A	7	2	28.57	0	0	#DIV/0!
IV 2713277	three_prime_utr	WBGene00022379	Y94H6A.7	15	5	33.33	0	0	#DIV/0!
IV 2713286	three_prime_utr	WBGene00022379	Y94H6A.7	15	3	20	0	0	#DIV/0!
IV 2713386	three_prime_utr	WBGene00022379	Y94H6A.7	15	6	40	5	5	100
IV 2713807	three_prime_utr	WBGene00022379	Y94H6A.7	18	4	22.22	0	0	#DIV/0!
IV 7770170	five_prime_utr	WBGene00016703	C46A5.8	11	2	18.18	0	0	#DIV/0!
IV 7770201	five_prime_utr	WBGene00016703	C46A5.8	8	3	37.5	0	0	#DIV/0!
IV 7770374	intergenic	intergenic	N/A	5	4	80	0	0	#DIV/0!
IV 13408504	three_prime_utr	WBGene00013382	gcl-1	34	11	32.35	3	1	33.3333
IV 13408513	three_prime_utr	WBGene00013382	gcl-1	32	16	50	7	5	71.4286
IV 13408516	three_prime_utr	WBGene00013382	gcl-1	32	9	28.12	5	2	40
IV 13408538	three_prime_utr	WBGene00013382	gcl-1	26	3	11.54	0	0	#DIV/0!
IV 13408539	three_prime_utr	WBGene00013382	gcl-1	26	5	19.23	0	0	#DIV/0!
IV 13408571	three_prime_utr	WBGene00013382	gcl-1	24	3	12.5	0	0	#DIV/0!
IV 13408577	three_prime_utr	WBGene00013382	gcl-1	23	7	30.43	0	0	#DIV/0!
IV 13408588	three_prime_utr	WBGene00013382	gcl-1	22	10	45.45	2	2	100
IV 13408593	three_prime_utr	WBGene00013382	gcl-1	21	8	38.1	2	2	100
IV 13408600	three_prime_utr	WBGene00013382	gcl-1	16	15	93.75	2	2	100
IV 13408603	three_prime_utr	WBGene00013382	gcl-1	16	11	68.75	2	2	100
IV 13408604	three_prime_utr	WBGene00013382	gcl-1	16	2	12.5	1	1	100
IV 13689154	intron	WBGene00011958	T23G4.2	10	3	30	0	0	#DIV/0!
IV 13689171	intron	WBGene00011958	T23G4.2	9	3	33.33	0	0	#DIV/0!
IV 13689191	intron	WBGene00011958	T23G4.2	11	3	27.27	0	0	#DIV/0!
IV 13689192	intron	WBGene00011958	T23G4.2	11	2	18.18	0	0	#DIV/0!
IV 13690529	intron	WBGene00011958	T23G4.2	5	3	60	0	0	#DIV/0!
IV 13690537	intron	WBGene00011958	T23G4.2	5	2	40	0	0	#DIV/0!
V 305024	three_prime_utr	WBGene00018013	phf-10	27	3	11.11	0	0	#DIV/0!
V 950615	three_prime_utr	WBGene00005024	sqv-6	14	10	71.43	10	5	50
V 950616	three_prime_utr	WBGene00005024	sqv-6	14	12	85.71	10	5	50
V 950652	three_prime_utr	WBGene00005024	sqv-6	11	6	54.55	14	8	57.1429
V 950669	three_prime_utr	WBGene00005024	sqv-6	16	2	12.5	3	1	33.3333
V 950675	three_prime_utr	WBGene00005024	sqv-6	16	2	12.5	6	2	33.3333
V 950719	three_prime_utr	WBGene00005024	sqv-6	19	6	31.58	2	1	50
V 950722	three_prime_utr	WBGene00005024	sqv-6	18	9	50	9	3	33.3333
V 950761	three_prime_utr	WBGene00005024	sqv-6	17	13	76.47	7	6	85.7143
V 950772	three_prime_utr	WBGene00005024	sqv-6	18	3	16.67	5	2	40
V 950787	three_prime_utr	WBGene00005024	sqv-6	15	3	20	3	1	33.3333
V 950788	three_prime_utr	WBGene00005024	sqv-6	15	3	20	1	1	100
V 951011	three_prime_utr	WBGene00005024	sqv-6	12	4	33.33	6	3	50
V 951022	three_prime_utr	WBGene00005024	sqv-6	11	4	36.36	9	7	77.7778
V 951040	three_prime_utr	WBGene00005024	sqv-6	10	2	20	0	0	#DIV/0!
V 951047	three_prime_utr	WBGene00005024	sqv-6	10	5	50	4	3	75
V 951053	three_prime_utr	WBGene00005024	sqv-6	10	3	30	0	0	#DIV/0!
V 951055	three_prime_utr	WBGene00005024	sqv-6	10	5	50	3	1	33.3333
V 951062	three_prime_utr	WBGene00005024	sqv-6	11	2	18.18	1	1	100
V 951116	three_prime_utr	WBGene00005024	sqv-6	13	8	61.54	0	0	#DIV/0!
V 951117	three_prime_utr	WBGene00005024	sqv-6	13	5	38.46	1	1	100
V 2031748	intergenic	intergenic	N/A	5	4	80	0	0	#DIV/0!
V 2031749	intergenic	intergenic	N/A	5	3	60	0	0	#DIV/0!
V 3711174	intergenic	intergenic	N/A	22	2	9.09	0	0	#DIV/0!
V 4456086	intergenic	intergenic	N/A	9	2	22.22	0	0	#DIV/0!
V 4517339	three_prime_utr	WBGene00004947	sos-1	22	3	13.64	5	3	60
V 4517340	three_prime_utr	WBGene00004947	sos-1	22	4	18.18	4	3	75
V 4517350	three_prime_utr	WBGene00004947	sos-1	19	16	84.2105	0	0	#DIV/0!
V 4517369	three_prime_utr	WBGene00004947	sos-1	16	8	50	3	3	100
V 4517370	three_prime_utr	WBGene00004947	sos-1	16	8	50	3	3	100
V 4517383	three_prime_utr	WBGene00004947	sos-1	12	2	16.67	0	0	#DIV/0!
V 4517384	three_prime_utr	WBGene00004947	sos-1	10	9	90	0	0	#DIV/0!
V 4517385	three_prime_utr	WBGene00004947	sos-1	10	2	20	0	0	#DIV/0!
V 4517473	three_prime_utr	WBGene00004947	sos-1	10	5	50	0	0	#DIV/0!
V 4517502	three_prime_utr	WBGene00004947	sos-1	13	6	46.15	0	0	#DIV/0!
V 4517503	three_prime_utr	WBGene00004947	sos-1	13	11	84.62	0	0	#DIV/0!
V 4517516	three_prime_utr	WBGene00004947	sos-1	15	3	20	0	0	#DIV/0!
V 4517520	three_prime_utr	WBGene00004947	sos-1	15	3	20	0	0	#DIV/0!
V 4517523	three_prime_utr	WBGene00004947	sos-1	14	2	14.29	0	0	#DIV/0!
V 10285654	intergenic	intergenic	N/A	7	4	57.14	0	0	#DIV/0!
V 10285669	intergenic	intergenic	N/A	8	2	25	0	0	#DIV/0!
V 15545137	intergenic	intergenic	N/A	23	4	17.39	0	0	#DIV/0!
V 15545175	intergenic	intergenic	N/A	20	14	70	0	0	#DIV/0!
V 15545981	intergenic	intergenic	N/A	11	4	36.36	0	0	#DIV/0!
V 15545994	intergenic	intergenic	N/A	12	10	83.33	0	0	#DIV/0!
V 15545999	intergenic	intergenic	N/A	12	5	41.67	0	0	#DIV/0!
V 15546000	intergenic	intergenic	N/A	11	5	45.45	0	0	#DIV/0!
V 15546001	intergenic	intergenic	N/A	11	3	27.27	0	0	#DIV/0!
V 15546005	intergenic	intergenic	N/A	11	3	27.27	0	0	#DIV/0!
V 15546010	intergenic	intergenic	N/A	10	6	60	0	0	#DIV/0!
V 15546011	intergenic	intergenic	N/A	10	4	40	0	0	#DIV/0!
V 15546121	intergenic	intergenic	N/A	12	7	58.33	0	0	#DIV/0!
V 15546150	intergenic	intergenic	N/A	13	12	92.31	0	0	#DIV/0!
V 15546151	intergenic	intergenic	N/A	13	12	92.31	0	0	#DIV/0!
V 15546168	intergenic	intergenic	N/A	14	5	35.71	0	0	#DIV/0!
V 15546169	intergenic	intergenic	N/A	14	4	28.57	0	0	#DIV/0!
V 15546174	intergenic	intergenic	N/A	14	12	85.71	0	0	#DIV/0!
V 15546185	intergenic	intergenic	N/A	16	2	12.5	0	0	#DIV/0!
V 15597345	intergenic	intergenic	N/A	5	2	40	0	0	#DIV/0!
V 15597346	intergenic	intergenic	N/A	5	2	40	0	0	#DIV/0!
V 15597347	intergenic	intergenic	N/A	5	2	40	0	0	#DIV/0!
V 15597371	intergenic	intergenic	N/A	5	2	40	0	0	#DIV/0!
V 15597374	intergenic	intergenic	N/A	5	2	40	0	0	#DIV/0!
V 15597379	intergenic	intergenic	N/A	5	2	40	0	0	#DIV/0!
V 15597381	intergenic	intergenic	N/A	5	3	60	0	0	#DIV/0!
V 15597382	intergenic	intergenic	N/A	5	4	80	0	0	#DIV/0!
V 15597406	intergenic	intergenic	N/A	6	2	33.33	0	0	#DIV/0!
V 17779619	intergenic	intergenic	N/A	7	4	57.14	0	0	#DIV/0!
V 17779636	intergenic	intergenic	N/A	6	3	50	0	0	#DIV/0!
V 18068990	intergenic	intergenic	N/A	11	7	63.64	0	0	#DIV/0!
V 18069049	intergenic	intergenic	N/A	7	2	28.57	0	0	#DIV/0!
V 19926805	three_prime_utr	WBGene00013362	Y60A3A.14	15	3	20	11	5	45.4545
V 19926841	three_prime_utr	WBGene00013362	Y60A3A.14	14	2	14.29	12	2	16.6667
V 19926853	three_prime_utr	WBGene00013362	Y60A3A.14	16	2	12.5	0	0	#DIV/0!
V 19926917	three_prime_utr	WBGene00013362	Y60A3A.14	19	6	31.58	11	8	72.7273
V 19926931	three_prime_utr	WBGene00013362	Y60A3A.14	19	3	15.79	8	2	25
V 19926933	three_prime_utr	WBGene00013362	Y60A3A.14	19	14	73.68	9	4	44.4444
V 19926934	three_prime_utr	WBGene00013362	Y60A3A.14	19	18	94.74	12	11	91.6667
V 19926936	three_prime_utr	WBGene00013362	Y60A3A.14	19	3	15.79	7	2	28.5714
V 19926947	three_prime_utr	WBGene00013362	Y60A3A.14	19	3	15.79	4	2	50
V 19926958	three_prime_utr	WBGene00013362	Y60A3A.14	18	4	22.22	2	1	50
V 19926961	three_prime_utr	WBGene00013362	Y60A3A.14	18	3	16.67	1	1	100
V 19926962	three_prime_utr	WBGene00013362	Y60A3A.14	18	4	22.22	4	3	75
V 19926964	three_prime_utr	WBGene00013362	Y60A3A.14	18	9	50	3	2	66.6667
V 19926971	three_prime_utr	WBGene00013362	Y60A3A.14	17	3	17.65	0	0	#DIV/0!
V 19926975	three_prime_utr	WBGene00013362	Y60A3A.14	16	9	56.25	0	0	#DIV/0!
V 19926976	three_prime_utr	WBGene00013362	Y60A3A.14	16	7	43.75	0	0	#DIV/0!
V 19927021	three_prime_utr	WBGene00013362	Y60A3A.14	12	8	66.67	4	3	75
V 19927056	three_prime_utr	WBGene00013362	Y60A3A.14	6	4	66.67	0	0	#DIV/0!
V 19927295	three_prime_utr	WBGene00013362	Y60A3A.14	9	6	66.67	20	5	25
V 19927296	three_prime_utr	WBGene00013362	Y60A3A.14	9	2	22.22	20	3	15
V 19927307	three_prime_utr	WBGene00013362	Y60A3A.14	10	5	50	0	0	#DIV/0!
V 19927308	three_prime_utr	WBGene00013362	Y60A3A.14	11	5	45.45	7	2	28.5714
V 19927309	three_prime_utr	WBGene00013362	Y60A3A.14	11	3	27.27	5	2	40
V 19927317	three_prime_utr	WBGene00013362	Y60A3A.14	11	9	81.82	16	14	87.5
V 19927318	three_prime_utr	WBGene00013362	Y60A3A.14	11	8	72.73	15	9	60
V 19927322	three_prime_utr	WBGene00013362	Y60A3A.14	11	8	72.73	18	15	83.3333
V 19927323	three_prime_utr	WBGene00013362	Y60A3A.14	11	4	36.36	17	11	64.7059
V 19927330	three_prime_utr	WBGene00013362	Y60A3A.14	12	11	91.67	22	15	68.1818
V 19927342	three_prime_utr	WBGene00013362	Y60A3A.14	13	9	69.23	30	14	46.6667
V 19927343	three_prime_utr	WBGene00013362	Y60A3A.14	13	5	38.46	33	7	21.2121
V 19927376	three_prime_utr	WBGene00013362	Y60A3A.14	15	7	46.67	31	18	58.0645
V 19927377	three_prime_utr	WBGene00013362	Y60A3A.14	15	9	60	31	10	32.2581
V 19927403	three_prime_utr	WBGene00013362	Y60A3A.14	17	16	94.12	33	29	87.8788
V 19927414	three_prime_utr	WBGene00013362	Y60A3A.14	16	4	25	25	16	64
V 19927417	three_prime_utr	WBGene00013362	Y60A3A.14	15	7	46.67	28	15	53.5714
V 19927422	three_prime_utr	WBGene00013362	Y60A3A.14	15	2	13.33	0	0	#DIV/0!
V 19927427	three_prime_utr	WBGene00013362	Y60A3A.14	15	3	20	12	4	33.3333
V 19927446	three_prime_utr	WBGene00013362	Y60A3A.14	10	3	30	7	3	42.8571
V 20218609	intergenic	intergenic	N/A	5	2	40	0	0	#DIV/0!
V 20859261	intergenic	intergenic	N/A	20	6	30	0	0	#DIV/0!
X 1027659	intergenic	intergenic	N/A	6	2	33.33	0	0	#DIV/0!
X 1892390	intergenic	intergenic	N/A	11	5	45.45	0	0	#DIV/0!
X 1892391	intergenic	intergenic	N/A	11	5	45.45	0	0	#DIV/0!
X 1892448	intergenic	intergenic	N/A	16	7	43.75	0	0	#DIV/0!
X 1892464	intergenic	intergenic	N/A	20	14	70	0	0	#DIV/0!
X 1892498	intergenic	intergenic	N/A	25	7	28	0	0	#DIV/0!
X 1892556	intergenic	intergenic	N/A	26	18	69.23	0	0	#DIV/0!
X 1892575	intergenic	intergenic	N/A	27	14	51.85	0	0	#DIV/0!
X 1892578	intergenic	intergenic	N/A	28	5	17.86	0	0	#DIV/0!
X 1892580	intergenic	intergenic	N/A	28	22	78.57	0	0	#DIV/0!
X 1892609	intergenic	intergenic	N/A	21	4	19.05	0	0	#DIV/0!
X 1892613	intergenic	intergenic	N/A	20	19	95	0	0	#DIV/0!
X 1892645	intergenic	intergenic	N/A	18	8	44.44	0	0	#DIV/0!
X 1892655	intergenic	intergenic	N/A	15	8	53.33	0	0	#DIV/0!
X 2443871	intergenic	intergenic	N/A	5	3	60	0	0	#DIV/0!
X 3027250	three_prime_utr	WBGene00019735	M02F4.1	15	2	13.33	0	0	#DIV/0!
X 3027251	three_prime_utr	WBGene00019735	M02F4.1	15	2	13.33	0	0	#DIV/0!
X 6600022	intergenic	intergenic	N/A	14	2	14.29	0	0	#DIV/0!
X 6600033	intergenic	intergenic	N/A	13	3	23.08	0	0	#DIV/0!
X 6600053	intergenic	intergenic	N/A	13	5	38.46	0	0	#DIV/0!
X 6600058	intergenic	intergenic	N/A	12	6	50	0	0	#DIV/0!
X 6600059	intergenic	intergenic	N/A	12	5	41.67	0	0	#DIV/0!
X 6600060	intergenic	intergenic	N/A	12	11	91.67	0	0	#DIV/0!
X 6600061	intergenic	intergenic	N/A	12	3	25	0	0	#DIV/0!
X 6600066	intergenic	intergenic	N/A	12	6	50	0	0	#DIV/0!
X 6600067	intergenic	intergenic	N/A	11	7	63.64	0	0	#DIV/0!
X 6600068	intergenic	intergenic	N/A	11	9	81.82	0	0	#DIV/0!
X 6600078	intergenic	intergenic	N/A	8	7	87.5	0	0	#DIV/0!
X 6600082	intergenic	intergenic	N/A	8	7	87.5	0	0	#DIV/0!
X 6600083	intergenic	intergenic	N/A	8	2	25	0	0	#DIV/0!
X 6600086	intergenic	intergenic	N/A	8	2	25	0	0	#DIV/0!
X 6600104	intergenic	intergenic	N/A	5	3	60	0	0	#DIV/0!
X 6600110	intergenic	intergenic	N/A	5	3	60	0	0	#DIV/0!
X 6601173	intergenic	intergenic	N/A	7	4	57.14	0	0	#DIV/0!
X 6601183	intergenic	intergenic	N/A	6	2	33.33	0	0	#DIV/0!
X 6601209	intergenic	intergenic	N/A	5	3	60	0	0	#DIV/0!
X 6601234	intergenic	intergenic	N/A	5	3	60	0	0	#DIV/0!
X 6601251	intergenic	intergenic	N/A	5	3	60	0	0	#DIV/0!
X 6601255	intergenic	intergenic	N/A	5	2	40	0	0	#DIV/0!
X 6601256	intergenic	intergenic	N/A	5	3	60	0	0	#DIV/0!
X 6601276	intergenic	intergenic	N/A	7	6	85.71	0	0	#DIV/0!
X 6601283	intergenic	intergenic	N/A	7	2	28.57	0	0	#DIV/0!
X 6601284	intergenic	intergenic	N/A	7	6	85.71	0	0	#DIV/0!
X 6601289	intergenic	intergenic	N/A	6	4	66.67	0	0	#DIV/0!
X 6601395	intergenic	intergenic	N/A	6	5	83.33	0	0	#DIV/0!
X 6601547	intergenic	intergenic	N/A	5	3	60	0	0	#DIV/0!
X 8577870	three_prime_utr	WBGene00044780	F18E9.8	5	3	60	0	0	#DIV/0!
X 8577887	three_prime_utr	WBGene00044780	F18E9.8	6	4	66.67	0	0	#DIV/0!
X 8577888	three_prime_utr	WBGene00044780	F18E9.8	6	5	83.33	0	0	#DIV/0!
X 8577889	three_prime_utr	WBGene00044780	F18E9.8	6	5	83.33	0	0	#DIV/0!
X 8578422	three_prime_utr	WBGene00044780	F18E9.8	7	4	57.14	0	0	#DIV/0!
X 8578423	three_prime_utr	WBGene00044780	F18E9.8	7	5	71.43	0	0	#DIV/0!
X 8578424	three_prime_utr	WBGene00044780	F18E9.8	7	2	28.57	0	0	#DIV/0!
X 8578435	three_prime_utr	WBGene00044780	F18E9.8	7	3	42.86	0	0	#DIV/0!
X 8578437	three_prime_utr	WBGene00044780	F18E9.8	7	4	57.14	0	0	#DIV/0!
X 8578439	three_prime_utr	WBGene00044780	F18E9.8	7	6	85.71	0	0	#DIV/0!
X 8578450	three_prime_utr	WBGene00044780	F18E9.8	7	5	71.43	0	0	#DIV/0!
X 8578459	three_prime_utr	WBGene00044780	F18E9.8	7	2	28.57	0	0	#DIV/0!
X 15534203	intergenic	intergenic	N/A	6	3	50	0	0	#DIV/0!
X 15534204	intergenic	intergenic	N/A	6	3	50	0	0	#DIV/0!
X 15534213	intergenic	intergenic	N/A	7	2	28.57	0	0	#DIV/0!
I 2034072	three_prime_utr	WBGene00021237	crtc-1	34	1	2.94	12	6	50
I 10820090	three_prime_utr	WBGene00016458	C35E7.6	40	2	5	10	4	40
I 10820125	three_prime_utr	WBGene00016458	C35E7.6	67	3	4.48	22	3	13.6364
I 10820144	three_prime_utr	WBGene00016458	C35E7.6	69	3	4.35	38	7	18.4211
I 10820200	three_prime_utr	WBGene00016458	C35E7.6	0	0	0	16	2	12.5
I 10820234	three_prime_utr	WBGene00016458	C35E7.6	0	0	0	27	5	18.5185
I 10820246	three_prime_utr	WBGene00016458	C35E7.6	0	0	0	12	2	16.6667
I 13658470	intergenic	intergenic	N/A	0	0	0	53	2	3.77358
II 5725302	intergenic	intergenic	N/A	0	0	0	11	3	27.2727
II 5725309	intergenic	intergenic	N/A	200	1	0.5	14	3	21.4286
II 5725312	intergenic	intergenic	N/A	202	1	0.5	16	3	18.75
V 2646595	three_prime_utr	WBGene00020957	W02H5.2	6	1	16.67	9	7	77.7778
V 2646811	three_prime_utr	WBGene00020957	W02H5.2	17	1	5.88	3	2	66.6667
V 2646837	three_prime_utr	WBGene00020957	W02H5.2	16	1	6.25	2	2	100
V 6172989	intergenic	intergenic	N/A	0	0	0	189	33	17.4603
V 6173757	intergenic	intergenic	N/A	0	0	0	124	18	14.5161
V 6174117	intergenic	intergenic	N/A	0	0	0	203	26	12.8079
I 1347145	intergenic	intergenic	N/A	25	2	8	8	5	62.5
I 10819605	intergenic	intergenic	N/A	0	0	0	62	14	22.5806
I 10819627	intergenic	intergenic	N/A	101	1	0.99	74	18	24.3243
I 10819628	intergenic	intergenic	N/A	102	2	1.96	74	35	47.2973
I 10819629	intergenic	intergenic	N/A	102	1	0.98	78	35	44.8718
I 10819630	intergenic	intergenic	N/A	0	0	0	37	2	5.40541
I 10819639	intergenic	intergenic	N/A	0	0	0	71	15	21.1268
I 10819640	intergenic	intergenic	N/A	103	1	0.97	51	11	21.5686
I 11924697	three_prime_utr	WBGene00006958	wve-1	26	2	7.69	10	4	40
III 4412097	intergenic	intergenic	N/A	0	0	0	8	2	25
III 12224037	three_prime_utr	WBGene00013552	gmn-1	0	0	0	13	4	30.7692
III 12224085	three_prime_utr	WBGene00013552	gmn-1	4	1	25	16	11	68.75
III 12224086	three_prime_utr	WBGene00013552	gmn-1	4	2	50	16	11	68.75
III 12224099	three_prime_utr	WBGene00013552	gmn-1	3	1	33.33	10	3	30
III 12224106	three_prime_utr	WBGene00013552	gmn-1	0	0	0	9	3	33.3333
III 12224107	three_prime_utr	WBGene00013552	gmn-1	0	0	0	9	3	33.3333
III 12224123	three_prime_utr	WBGene00013552	gmn-1	1	1	100	8	5	62.5
III 12224124	three_prime_utr	WBGene00013552	gmn-1	1	1	100	10	6	60
III 12224437	three_prime_utr	WBGene00013552	gmn-1	0	0	0	2	2	100
III 12224438	three_prime_utr	WBGene00013552	gmn-1	0	0	0	4	3	75
III 12224447	three_prime_utr	WBGene00013552	gmn-1	0	0	0	5	4	80
III 12224464	three_prime_utr	WBGene00013552	gmn-1	0	0	0	8	4	50
III 12224486	three_prime_utr	WBGene00013552	gmn-1	1	1	100	8	4	50
IV 7727609	intergenic	intergenic	N/A	0	0	0	11	3	27.2727
IV 13408514	three_prime_utr	WBGene00013382	gcl-1	32	1	3.12	5	2	40
V 19926821	three_prime_utr	WBGene00013362	Y60A3A.14	0	0	0	12	3	25
X 9479243	intergenic	intergenic	N/A	0	0	0	12	2	16.6667
III 12545447	intron	WBGene00013732	aakg-1	6	2	33.33	0	0	#DIV/0!
III 12545481	intron	WBGene00013732	aakg-1	7	5	71.43	0	0	#DIV/0!
III 12545506	intron	WBGene00013732	aakg-1	9	6	66.67	0	0	#DIV/0!
III 12545574	intron	WBGene00013732	aakg-1	6	5	83.33	0	0	#DIV/0!
III 12545586	intron	WBGene00013732	aakg-1	5	2	40	0	0	#DIV/0!
III 12546569	intron	WBGene00013732	aakg-1	5	3	60	0	0	#DIV/0!
III 12546667	intron	WBGene00013732	aakg-1	5	4	80	0	0	#DIV/0!
III 12545437	intron	WBGene00013732	aakg-1	5	4	80	0	0	#DIV/0!
III 12545283	intron	WBGene00013732	aakg-1	5	4	80	0	0	#DIV/0!
III 12545205	intron	WBGene00013732	aakg-1	13	6	46.15	0	0	#DIV/0!
III 12545232	intron	WBGene00013732	aakg-1	10	7	70	0	0	#DIV/0!
III 12545237	intron	WBGene00013732	aakg-1	9	7	77.78	0	0	#DIV/0!
III 12545238	intron	WBGene00013732	aakg-1	9	5	55.56	0	0	#DIV/0!
III 12545243	intron	WBGene00013732	aakg-1	9	2	22.22	0	0	#DIV/0!
III 12545250	intron	WBGene00013732	aakg-1	9	2	22.22	0	0	#DIV/0!
III 12545253	intron	WBGene00013732	aakg-1	8	2	25	0	0	#DIV/0!
III 12545266	intron	WBGene00013732	aakg-1	5	3	60	0	0	#DIV/0!
III 12554436	intron	WBGene00013732	aakg-1	15	7	46.67	0	0	#DIV/0!
III 12554466	intron	WBGene00013732	aakg-1	15	2	13.33	0	0	#DIV/0!
III 12554592	intron	WBGene00013732	aakg-1	13	2	15.38	0	0	#DIV/0!
III 12554606	intron	WBGene00013732	aakg-1	14	3	21.43	0	0	#DIV/0!
III 12554622	intron	WBGene00013732	aakg-1	14	2	14.29	0	0	#DIV/0!
III 12554623	intron	WBGene00013732	aakg-1	14	9	64.29	0	0	#DIV/0!
III 12554624	intron	WBGene00013732	aakg-1	14	8	57.14	0	0	#DIV/0!
III 12554629	intron	WBGene00013732	aakg-1	14	5	35.71	0	0	#DIV/0!
III 12554630	intron	WBGene00013732	aakg-1	13	7	53.85	0	0	#DIV/0!
III 12554650	intron	WBGene00013732	aakg-1	14	5	35.71	0	0	#DIV/0!
[truncated: 4,354 more rows]
