# Supplementary material for: Profiling neural editomes reveals a molecular mechanism to regulate RNA editing during development
Source: HighWire-hosted journal article supplement (doi:10.1101/gr.267575.120), 2020-12-18
Supplement: Supplemental_Table_S5.xlsx [file Supplemental_Table_S5.xlsx]

## Sheet: Diff exp in WT L1 to adults
Supplemental Table 5: Differential gene expression analysis of L1 and adult neural cells from wild-type worms (related to Fig. 3D). Expression of all genes in wild-type L1 and adult neural RNA-seq datasets from three biological replicates are listed by gene name (column A) and Wormbase annotation (column B). DESeq2 values for (L1 neural /adult neural) are listed (log2 Fold change) as well as both…
Gene Name	Gene ID	log2FoldChange	pvalue	padj	WT adult rep.1	WT adult rep.2	WT adult rep.3	WT L1 rep.1	WT L1 rep.2	WT L1 rep.3
21ur-10091	WBGene00165046	5.40534	0.170185	NA	0	0	0	0	0	13.7725
21ur-10114	WBGene00170460	2.44881	0.548421	NA	0	0	0	1.16026	0	0
21ur-10346	WBGene00170914	4.08186	0.306404	NA	0	0	0	0	5.27568	0
21ur-10371	WBGene00174726	4.48461	0.258726	NA	0	0	0	6.96158	0	0
21ur-10481	WBGene00173323	6.37733	0.0882022	0.136551	0	0	0	4.64105	0	22.036
21ur-11101	WBGene00173486	-1.65185	0.677424	NA	0	2.70533	0	0	0	0
21ur-1117	WBGene00047855	3.10809	0.442051	NA	0	0	0	2.32053	0	0
21ur-11254	WBGene00171427	-0.0590556	0.988324	NA	0	0.676332	0	0	0	0
21ur-11369	WBGene00169389	4.65796	0.239926	NA	0	0	0	0	7.91352	0
21ur-11407	WBGene00165955	-3.36901	0.390918	NA	0	0	9.40032	0	0	0
21ur-11641	WBGene00168911	4.39859	0.268437	NA	0	0	0	0	6.5946	0
21ur-11643	WBGene00171210	-4.47352	0.253317	0.329993	19.3837	0.338166	0	0	0	0
21ur-11797	WBGene00168225	-4.28017	0.274576	0.352765	0	15.8938	1.3429	0	0	0
21ur-11825	WBGene00168120	5.89956	0.133418	0.191969	0	0	0	0	0	19.2815
21ur-11845	WBGene00171141	6.53948	0.0678005	0.109247	0	0	0	0	13.1892	16.527
21ur-11893	WBGene00171525	3.91339	0.328027	NA	0	0	0	4.64105	0	0
21ur-11933	WBGene00169071	-2.62851	0.504683	NA	0	5.41065	0	0	0	0
21ur-12037	WBGene00165783	-0.0590556	0.988324	NA	0	0.676332	0	0	0	0
21ur-12156	WBGene00170366	-2.53706	0.519848	NA	0	5.07249	0	0	0	0
21ur-12195	WBGene00173930	4.29797	0.28012	NA	0	0	0	3.48079	2.63784	0
21ur-12218	WBGene00174366	2.44881	0.548421	NA	0	0	0	0	0	2.7545
21ur-12264	WBGene00167269	5.07579	0.198734	NA	0	0	0	0	0	11.018
21ur-12284	WBGene00174955	6.60282	0.0617598	0.100777	0	0	0	0	14.5081	16.527
21ur-12305	WBGene00174624	0.58206	0.886334	NA	0	0.338166	0	0	0	0
21ur-12311	WBGene00173615	4.48461	0.258726	NA	0	0	0	6.96158	0	0
21ur-12357	WBGene00169200	-1.96482	0.619671	NA	0	3.38166	0	0	0	0
21ur-12454	WBGene00172646	3.91339	0.328027	NA	0	0	0	4.64105	0	0
21ur-1246	WBGene00050635	5.89956	0.133418	0.191969	0	0	0	0	0	19.2815
21ur-12508	WBGene00175009	4.64816	0.240961	NA	0	0	0	0	0	8.26351
21ur-12544	WBGene00168824	5.23941	0.184138	NA	0	0	0	0	9.23244	2.7545
21ur-12578	WBGene00170782	2.44881	0.548421	NA	0	0	0	0	0	2.7545
21ur-12587	WBGene00167544	5.07579	0.198734	NA	0	0	0	0	0	11.018
21ur-12701	WBGene00170257	2.44881	0.548421	NA	0	0	0	1.16026	0	0
21ur-12735	WBGene00167365	-3.42481	0.383027	NA	0	9.46864	0	0	0	0
21ur-12807	WBGene00168864	-2.79563	0.47758	NA	0	6.08699	0	0	0	0
21ur-12975	WBGene00173203	-5.70895	0.0194597	0.0364284	6.32078	5.74882	34.9155	0	0	0
21ur-130	WBGene00048938	6.79884	0.0467658	0.0792483	0	0	0	8.12184	0	27.545
21ur-13033	WBGene00168555	5.05959	0.200225	NA	0	0	0	10.4424	0	0
21ur-13083	WBGene00173279	-1.46535	0.712706	NA	0	2.36716	0	0	0	0
21ur-13274	WBGene00170152	2.44881	0.548421	NA	0	0	0	0	1.31892	0
21ur-13288	WBGene00173414	-2.40216	0.542633	NA	4.63524	0	0	0	0	0
21ur-13290	WBGene00170957	-4.48424	0.252173	0.328701	0	0	20.1435	0	0	0
21ur-13312	WBGene00170928	3.23054	0.423525	NA	0	0	0	0	2.63784	0
21ur-13397	WBGene00166386	5.89956	0.133418	0.191969	0	0	0	0	0	19.2815
21ur-13428	WBGene00167949	4.65153	0.240605	NA	0	0	0	0	2.63784	5.50901
21ur-13741	WBGene00166174	5.05959	0.200225	NA	0	0	0	10.4424	0	0
21ur-13771	WBGene00170874	4.03858	0.311864	NA	0	0	0	0	0	5.50901
21ur-13909	WBGene00169540	-2.33462	0.554221	NA	0	4.39616	0	0	0	0
21ur-13919	WBGene00169175	5.06822	0.199429	NA	0	0	0	0	10.5514	0
21ur-14053	WBGene00167875	-2.08674	0.597735	NA	3.37108	0.338166	0	0	0	0
21ur-14076	WBGene00171305	5.06822	0.199429	NA	0	0	0	0	10.5514	0
21ur-14084	WBGene00170117	4.16009	0.0641124	0.104126	0	2.36716	0	4.64105	3.95676	38.5631
21ur-14313	WBGene00168710	-1.54439	0.697682	NA	2.52831	0	0	0	0	0
21ur-14330	WBGene00170809	-3.39923	0.0538514	0.0896782	40.0316	27.3914	12.0861	6.96158	0	0
21ur-14437	WBGene00172430	-0.479924	0.904891	NA	0	1.0145	0	0	0	0
21ur-14438	WBGene00166269	4.64816	0.240961	NA	0	0	0	0	0	8.26351
21ur-14731	WBGene00165013	-0.164822	0.967378	NA	0.421385	0.338166	0	0	0	0
21ur-14742	WBGene00165439	0.58206	0.886334	NA	0	0.338166	0	0	0	0
21ur-14760	WBGene00172655	-2.53964	0.519417	NA	0	0	5.37161	0	0	0
21ur-14770	WBGene00169377	0.357125	0.929898	NA	0	0	1.3429	0	0	0
21ur-14777	WBGene00168093	-0.78892	0.843869	NA	0	1.35266	0	0	0	0
21ur-14822	WBGene00171280	2.44881	0.548421	NA	0	0	0	0	0	2.7545
21ur-14823	WBGene00173055	-3.56285	0.0622997	0.101515	14.3271	11.8358	59.0877	0	0	8.26351
21ur-14881	WBGene00172016	3.67989	0.359553	NA	0	0	0	0	3.95676	0
21ur-14916	WBGene00173508	6.09498	0.120739	0.177301	0	0	0	0	0	22.036
21ur-14922	WBGene00172390	-2.22159	0.573876	NA	0	4.05799	0	0	0	0
21ur-15085	WBGene00172191	3.10809	0.442051	NA	0	0	0	2.32053	0	0
21ur-15098	WBGene00167427	5.67349	0.149372	0.210439	0	0	0	0	0	16.527
21ur-15110	WBGene00167454	4.08186	0.306404	NA	0	0	0	0	5.27568	0
21ur-15194	WBGene00167129	-0.0717381	0.985686	NA	0	1.69083	0	0	1.31892	0
21ur-15336	WBGene00172257	4.64816	0.240961	NA	0	0	0	0	0	8.26351
21ur-15384	WBGene00165826	4.87766	0.217551	NA	0	0	0	0	9.23244	0
21ur-15386	WBGene00172654	2.44881	0.548421	NA	0	0	0	1.16026	0	0
21ur-15396	WBGene00169633	4.64816	0.240961	NA	0	0	0	0	0	8.26351
21ur-15499	WBGene00172638	-3.89241	0.320821	NA	0	0	13.429	0	0	0
21ur-15510	WBGene00167282	5.67349	0.149372	0.210439	0	0	0	0	0	16.527
21ur-15545	WBGene00167440	2.44881	0.548421	NA	0	0	0	0	0	2.7545
21ur-15576	WBGene00169072	-2.87244	0.465394	NA	0	6.42515	0	0	0	0
21ur-15580	WBGene00174927	-1.25079	0.753954	NA	0	2.029	0	0	0	0
21ur-15583	WBGene00171984	4.03858	0.311864	NA	0	0	0	0	0	5.50901
21ur-15588	WBGene00168399	-3.63003	0.354862	NA	10.956	0	0	0	0	0
21ur-15595	WBGene00165820	2.44881	0.548421	NA	0	0	0	1.16026	0	0
21ur-1570	WBGene00046371	5.40534	0.170185	NA	0	0	0	0	0	13.7725
21ur-1666	WBGene00049528	-1.46535	0.712706	NA	0	2.36716	0	0	0	0
21ur-177	WBGene00050458	5.07579	0.198734	NA	0	0	0	0	0	11.018
21ur-1900	WBGene00050541	-0.859637	0.82252	NA	9.69186	0	0	0	5.27568	0
21ur-1927	WBGene00047371	5.06822	0.199429	NA	0	0	0	0	10.5514	0
21ur-199	WBGene00047835	-4.96765	0.204304	0.275883	27.8114	0	0	0	0	0
21ur-2016	WBGene00046716	5.67349	0.149372	0.210439	0	0	0	0	0	16.527
21ur-2282	WBGene00046814	2.44881	0.548421	NA	0	0	0	0	1.31892	0
21ur-2503	WBGene00047652	2.44881	0.548421	NA	0	0	0	0	0	2.7545
21ur-2620	WBGene00048828	0.58206	0.886334	NA	0	0.338166	0	0	0	0
21ur-2655	WBGene00047432	3.67989	0.359553	NA	0	0	0	0	3.95676	0
21ur-2658	WBGene00046871	-2.53706	0.519848	NA	0	5.07249	0	0	0	0
21ur-2855	WBGene00047695	2.44881	0.548421	NA	0	0	0	0	1.31892	0
21ur-2907	WBGene00048613	-2.94537	0.453986	NA	0	6.76332	0	0	0	0
21ur-2912	WBGene00047843	5.64813	0.151251	NA	0	0	0	0	15.827	0
21ur-2957	WBGene00045896	5.40534	0.170185	NA	0	0	0	0	0	13.7725
21ur-2998	WBGene00047331	4.70282	0.235227	NA	0	0	0	8.12184	0	0
21ur-3156	WBGene00049624	4.87766	0.217551	NA	0	0	0	0	9.23244	0
21ur-3324	WBGene00048363	5.46935	0.165025	NA	0	0	0	13.9232	0	0
21ur-3334	WBGene00049844	-0.78892	0.843869	NA	0	1.35266	0	0	0	0
21ur-3513	WBGene00045637	5.98964	0.127449	0.185464	0	0	0	0	6.5946	13.7725
21ur-4167	WBGene00050651	0.904152	0.813299	NA	4.21385	0	0	0	7.91352	0
21ur-4177	WBGene00050580	-5.33834	0.172369	0.238706	0	0	36.2584	0	0	0
21ur-4239	WBGene00048583	2.44881	0.548421	NA	0	0	0	0	0	2.7545
21ur-4318	WBGene00045528	3.91339	0.328027	NA	0	0	0	4.64105	0	0
21ur-4379	WBGene00049165	5.07579	0.198734	NA	0	0	0	0	0	11.018
21ur-4385	WBGene00048676	4.48461	0.258726	NA	0	0	0	6.96158	0	0
21ur-4410	WBGene00046449	-1.96482	0.619671	NA	0	3.38166	0	0	0	0
21ur-4577	WBGene00046257	5.56137	0.157819	NA	0	0	0	6.96158	7.91352	0
21ur-4665	WBGene00049703	5.40534	0.170185	NA	0	0	0	0	0	13.7725
21ur-471	WBGene00047447	-5.44197	0.16415	0.228346	0	0	38.9442	0	0	0
21ur-4789	WBGene00049466	4.03858	0.311864	NA	0	0	0	0	0	5.50901
21ur-5008	WBGene00047124	5.05959	0.200225	NA	0	0	0	10.4424	0	0
21ur-5098	WBGene00050658	-1.81686	0.646729	NA	0	3.04349	0	0	0	0
21ur-536	WBGene00050435	0.434766	0.91482	NA	0.421385	0	0	0	0	0
21ur-5397	WBGene00046626	4.64816	0.240961	NA	0	0	0	0	0	8.26351
21ur-6071	WBGene00167607	5.23649	0.184391	NA	0	0	0	0	11.8703	0
21ur-6158	WBGene00174595	6.16431	0.111827	0.166798	0	0	0	0	11.8703	11.018
21ur-6325	WBGene00173658	4.64816	0.240961	NA	0	0	0	0	0	8.26351
21ur-6400	WBGene00174923	-0.78892	0.843869	NA	0	1.35266	0	0	0	0
21ur-6420	WBGene00174551	6.31298	0.0915439	0.140832	0	0	0	11.6026	0	13.7725
21ur-6598	WBGene00169590	-4.15888	0.288522	NA	0	0	16.1148	0	0	0
21ur-6679	WBGene00167223	2.44881	0.548421	NA	0	0	0	1.16026	0	0
21ur-6778	WBGene00171255	4.48461	0.258726	NA	0	0	0	6.96158	0	0
21ur-7050	WBGene00174811	3.23054	0.423525	NA	0	0	0	0	2.63784	0
21ur-7337	WBGene00173728	4.39859	0.268437	NA	0	0	0	0	6.5946	0
21ur-7848	WBGene00171754	5.06822	0.199429	NA	0	0	0	0	10.5514	0
21ur-7869	WBGene00169905	3.67989	0.359553	NA	0	0	0	0	3.95676	0
21ur-8288	WBGene00172797	-2.53706	0.519848	NA	0	5.07249	0	0	0	0
21ur-8468	WBGene00172625	-1.95055	0.62226	NA	3.37108	0	0	0	0	0
21ur-8593	WBGene00171561	6.4208	0.101755	0.153838	0	0	0	0	0	27.545
21ur-8612	WBGene00171166	6.4208	0.101755	0.153838	0	0	0	0	0	27.545
21ur-8658	WBGene00171937	-4.61583	0.238369	0.313915	14.3271	7.43965	0	0	0	0
21ur-874	WBGene00050187	6.46054	0.0749422	0.118822	0	0	0	11.6026	0	16.527
21ur-9360	WBGene00172012	-1.25079	0.753954	NA	0	2.029	0	0	0	0
21ur-9393	WBGene00171513	5.07579	0.198734	NA	0	0	0	0	0	11.018
21ur-9463	WBGene00169699	2.44881	0.548421	NA	0	0	0	1.16026	0	0
21ur-9478	WBGene00170559	5.89956	0.133418	0.191969	0	0	0	0	0	19.2815
21ur-9480	WBGene00174292	6.09498	0.120739	0.177301	0	0	0	0	0	22.036
21ur-9578	WBGene00169357	5.06822	0.199429	NA	0	0	0	0	10.5514	0
21ur-9636	WBGene00168500	2.44881	0.548421	NA	0	0	0	0	0	2.7545
2L52.1	WBGene00007063	0.328733	NA	NA	0	68.3095	4.02871	12.7629	13.1892	66.1081
2RSSE.1	WBGene00007064	2.141	1.1e-07	5.17e-07	347.221	361.837	299.467	916.608	2073.34	1462.64
4R79.2	WBGene00007067	2.96275	0.00215018	0.00499568	2.10693	19.6136	38.9442	216.969	105.514	140.48
aagr-1	WBGene00017071	0.663228	0.164125	0.228346	385.567	347.296	359.898	639.305	808.498	278.205
aagr-2	WBGene00019895	-1.96706	4.89e-07	2.09e-06	2112.82	1527.5	1819.63	561.567	548.671	280.959
aagr-3	WBGene00009583	-0.706746	0.0472632	0.0799975	3671.95	2227.5	2554.2	2210.3	1485.1	1481.92
aagr-4	WBGene00018682	-9.36377	6.25e-28	2.39e-26	3877.59	1592.76	3432.46	11.6026	0	0
aak-1	WBGene00019801	-0.358089	0.468765	0.553154	601.738	438.601	432.415	612.619	312.584	220.36
aak-2	WBGene00020142	2.60607	3.6e-20	6.97e-19	522.939	593.481	670.109	3401.89	3198.38	4269.48
aakb-1	WBGene00010115	1.07264	0.0017766	0.00420374	439.926	333.093	381.384	659.029	754.422	1019.17
aakb-2	WBGene00012928	1.23286	0.000959211	0.00238859	266.737	221.837	320.954	792.46	614.617	487.547
aakg-1	WBGene00013732	1.99371	8.14e-14	8.13e-13	589.939	727.733	678.166	2959.83	2397.8	2589.23
aakg-2	WBGene00020633	1.37772	0.00151115	0.00362608	364.919	211.015	197.407	508.195	646.271	862.16
aakg-3	WBGene00021527	3.5918	0.000896034	0.00224157	88.4909	38.2127	0	387.528	415.46	738.207
aakg-4	WBGene00020135	2.22563	1.14e-16	1.52e-15	218.277	229.276	247.094	1090.65	1102.62	1049.47
aakg-5	WBGene00011276	-0.133392	0.777611	0.825593	246.089	334.108	276.638	266.86	151.676	366.349
aap-1	WBGene00000001	0.34467	0.485885	0.569689	125.994	175.508	193.378	244.815	125.297	258.923
aars-1	WBGene00000196	-0.829037	0.123213	0.180322	139.9	127.827	267.238	98.6223	120.022	79.8806
aars-2	WBGene00000197	-0.309431	0.41464	0.50007	1467.26	1338.12	901.088	1205.51	700.347	1088.03
aat-1	WBGene00000002	0.8705	0.0495223	0.0834465	303.819	169.421	179.949	297.027	424.692	476.529
aat-2	WBGene00000003	-0.201049	0.645417	0.713774	362.813	198.165	249.78	247.136	187.287	272.696
aat-3	WBGene00000004	3.86048	2.11e-22	5.05e-21	210.693	155.218	205.464	3238.29	1661.84	3390.79
aat-4	WBGene00000005	-8.41054	5.08e-09	2.81e-08	103.239	84.8796	115.49	0	0	0
aat-5	WBGene00000006	4.39079	7.26e-21	1.5e-19	148.749	183.624	437.786	4907.91	5497.26	5663.26
aat-6	WBGene00000007	-2.2524	0.0706753	0.113162	22.7548	58.5027	163.834	19.7245	30.3352	0
aat-7	WBGene00000008	3.74772	0.340776	NA	0	0	1.3429	0	9.23244	0
aat-8	WBGene00000009	-1.92036	0.485274	0.569227	32.0253	8.45415	0	10.4424	0	0
aat-9	WBGene00000010	-1.0319	0.0651146	0.105556	220.384	134.928	400.185	102.103	123.979	143.234
abce-1	WBGene00012714	-1.35465	0.00393374	0.00867915	720.147	734.158	478.073	384.047	166.184	203.833
abcf-1	WBGene00006512	-3.75324	6.18e-23	1.54e-21	1260.78	1332.04	2171.47	133.43	113.427	104.671
abcf-2	WBGene00012097	0.32319	0.286152	0.364794	3136.79	3287.99	3702.38	5390.58	3835.42	3437.62
abcf-3	WBGene00018339	-0.851711	0.033965	0.0597939	675.902	732.129	601.621	507.035	362.703	239.642
abch-1	WBGene00016973	-0.576027	0.802158	0.846267	27.39	0	17.4577	5.80131	0	24.7905
abcx-1	WBGene00006522	1.81797	0.494181	0.577252	26.1259	0	0	0	10.5514	82.6351
abf-1	WBGene00000012	-2.53706	0.519848	NA	0	5.07249	0	0	0	0
abf-2	WBGene00000013	-5.78829	0.00116439	0.00285526	55.6228	19.9518	20.1435	1.16026	0	0
abf-4	WBGene00000015	6.64068	0.0533914	0.0889978	0	0	0	10.4424	21.1027	0
abf-5	WBGene00000016	-0.909781	0.433214	0.518505	88.9123	45.3142	4.02871	26.686	32.973	13.7725
abf-6	WBGene00000017	-0.0952122	0.888952	0.914363	126.416	118.358	114.147	61.4939	212.346	60.5991
abi-1	WBGene00015146	-0.878986	0.053896	0.0897103	286.12	389.567	276.638	131.11	245.319	140.48
abl-1	WBGene00000018	1.70858	0.000359133	0.000971944	242.718	155.894	149.062	537.202	375.892	884.196
abt-1	WBGene00000019	-5.14473	3.19e-05	0.000102983	116.302	71.0148	116.833	0	7.91352	0
abt-2	WBGene00000020	3.45105	1.19e-11	9.19e-11	341.743	169.083	108.775	1784.48	1928.26	3090.55
abt-4	WBGene00000022	-0.00616053	0.988335	0.991077	455.096	452.128	475.388	458.304	638.357	275.45
abt-5	WBGene00000023	-1.42546	0.499735	0.582369	0	44.9761	52.3732	0	9.23244	27.545
abtm-1	WBGene00022281	0.799916	0.100646	0.152521	115.46	174.832	256.494	312.111	236.087	402.158
abts-1	WBGene00009920	4.50988	1.71e-24	4.93e-23	1191.26	732.467	727.853	13155.1	16121.2	31164.5
abts-2	WBGene00009929	-1.92974	0.0144132	0.0279125	54.7801	155.894	89.9745	42.9297	15.827	19.2815
abts-3	WBGene00019018	4.23664	4.78e-59	1.29e-56	324.045	287.103	286.038	4871.94	5765	6294.04
abts-4	WBGene00019844	-0.914745	0.0393486	0.0680829	427.284	433.867	386.756	222.77	305.99	129.462
abu-1	WBGene00000024	-9.9813	1.25e-14	1.36e-13	322.781	314.494	263.209	0	0	0
abu-10	WBGene00000033	-10.5031	3.5e-15	4.04e-14	521.253	224.204	549.247	0	0	0
abu-11	WBGene00000034	-10.2516	1.59e-15	1.91e-14	769.449	436.91	911.831	1.16026	0	0
abu-12	WBGene00004127	-11.0284	3.05e-18	4.81e-17	736.581	494.398	631.164	0	0	0
abu-13	WBGene00004133	-9.23361	1.33e-30	6.09e-29	2240.93	1215.37	1712.2	6.96158	0	0
abu-14	WBGene00004174	-5.77576	2.12e-33	1.22e-31	2340.79	1168.36	1939.15	47.5708	25.0595	24.7905
abu-15	WBGene00004099	-10.1618	4.19e-15	4.79e-14	407.479	277.972	335.726	0	0	0
abu-2	WBGene00000025	-2.26679	0.565977	NA	4.21385	0	0	0	0	0
abu-4	WBGene00000027	-6.29262	0.00772742	0.0159439	119.252	16.5701	0	1.16026	0	0
abu-6	WBGene00000029	-9.66563	8.32e-12	6.56e-11	421.806	144.397	157.12	0	0	0
abu-8	WBGene00000031	-8.26226	1.62e-23	4.24e-22	1371.61	784.545	859.458	8.12184	0	0
AC3.12	WBGene00077503	-6.28117	0.0378907	0.0658493	0	11.8358	57.7448	0	0	0
AC3.13	WBGene00077504	-2.43939	0.536295	NA	0	4.73432	0	0	0	0
AC3.16	WBGene00200016	-2.79563	0.47758	NA	0	6.08699	0	0	0	0
AC3.5	WBGene00007071	-4.98067	9.67e-14	9.58e-13	1305.87	895.801	1603.43	12.7629	81.7731	24.7905
AC7.3	WBGene00014997	-6.88596	0.000112887	0.000333888	29.9183	40.5799	34.9155	0	0	0
AC8.2	WBGene00007074	-0.78892	0.843869	NA	0	1.35266	0	0	0	0
AC8.5	WBGene00007077	1.47198	0.697525	0.75844	0	5.74882	0	0	0	16.527
acbp-1	WBGene00016655	-3.91011	2.55e-21	5.6e-20	6978.98	9039.85	7536.37	403.771	809.817	349.822
acbp-3	WBGene00009818	-3.03863	2.71e-07	1.21e-06	863.839	557.297	649.965	33.6476	146.4	71.6171
acbp-4	WBGene00018949	-6.40825	0.00135232	0.00327351	27.8114	13.1885	34.9155	0	0	0
acbp-5	WBGene00011731	-0.661251	0.221379	0.295127	140.743	125.798	122.204	67.2952	58.0325	123.953
acbp-6	WBGene00012457	0.678702	0.552886	0.631844	9.27047	81.8361	12.0861	20.8847	39.5676	107.426
acbp-7	WBGene00044603	6.68725	4.91e-08	2.42e-07	0	10.8213	0	232.053	393.038	575.691
acc-1	WBGene00010275	5.07179	3.65e-05	0.000116874	0.84277	81.8361	1.3429	588.253	1134.27	1134.86
acc-2	WBGene00008280	4.12201	1.15e-13	1.13e-12	22.3334	12.8503	40.2871	319.072	473.492	479.284
acc-3	WBGene00018880	4.39214	1.62e-14	1.74e-13	20.2265	13.8648	28.201	319.072	280.93	683.117
acc-4	WBGene00012099	3.79837	1.46e-14	1.58e-13	136.95	62.5607	218.893	1711.39	2118.19	1947.43
acd-1	WBGene00016064	-4.8032	0.204693	0.276323	19.3837	5.41065	0	0	0	0
acd-2	WBGene00016066	-2.76781	0.0163695	0.0312887	109.56	24.0098	95.3461	15.0834	17.146	0
acd-3	WBGene00007775	1.33778	0.091338	0.140577	54.3587	22.3189	33.5726	35.9681	96.2812	148.743
acd-4	WBGene00017879	7.1356	0.0213047	0.0394949	0	0	0	22.045	22.4216	0
acd-5	WBGene00020903	-2.69677	0.0826557	0.129256	110.403	117.682	2.68581	4.64105	30.3352	0
acdh-1	WBGene00016943	-4.11133	0.0178457	0.0338158	26139.8	24071.3	23279.2	172.879	4070.19	8.26351
acdh-10	WBGene00020366	-0.56072	0.0668612	0.107914	1290.7	1480.15	1482.56	771.575	1177.8	933.777
acdh-11	WBGene00012860	-2.21398	0.000153676	0.000443635	694.021	625.269	487.474	153.155	191.243	41.3176
acdh-12	WBGene00017125	-1.97184	4.71e-08	2.32e-07	813.273	688.167	903.774	151.994	216.303	247.905
acdh-13	WBGene00001566	-0.728954	0.1006	0.152465	233.026	170.774	178.606	90.5005	125.297	137.725
acdh-2	WBGene00015894	-6.42991	4.93e-13	4.52e-12	862.997	486.282	714.424	0	5.27568	22.036
acdh-3	WBGene00019433	-1.31635	0.000840668	0.00211588	658.204	927.251	799.027	278.463	439.2	236.887
acdh-4	WBGene00020419	-4.39406	1.11e-05	3.87e-05	114.195	79.8071	87.2887	9.2821	2.63784	0
acdh-5	WBGene00016491	-5.66599	1.11e-05	3.89e-05	156.334	85.8941	52.3732	0	5.27568	0
acdh-6	WBGene00015335	-8.73481	6.74e-15	7.54e-14	479.536	336.137	565.362	0	0	5.50901
acdh-7	WBGene00020812	-0.759319	0.0246381	0.0449387	1509.4	1302.28	1162.95	691.517	1020.84	633.536
acdh-8	WBGene00019406	-6.41295	2.74e-10	1.79e-09	174.875	199.18	252.466	0	6.5946	0
acdh-9	WBGene00017874	-1.06882	0.0143925	0.0278847	1169.76	1085.51	1156.24	722.844	622.53	275.45
ace-1	WBGene00000035	0.420515	0.583998	0.659818	91.4406	49.3722	22.8294	58.0131	104.195	57.8446
ace-2	WBGene00000036	2.30826	4.63e-09	2.58e-08	379.247	226.233	307.525	1022.19	1743.61	1757.37
ace-3	WBGene00000037	5.50464	6.33e-16	7.87e-15	245.246	31.7876	95.3461	3498.19	5469.56	7960.52
ace-4	WBGene00000038	5.22742	0.000219781	0.000617609	0	13.5266	0	150.834	127.935	253.414
acin-1	WBGene00016601	-1.86688	5.45e-05	0.000169344	1444.51	1879.19	3871.59	647.427	532.844	793.297
acl-1	WBGene00010339	-0.00408073	0.993141	0.995437	297.919	257.006	185.321	346.919	226.854	162.516
acl-11	WBGene00017888	0.526435	0.494791	0.577773	46.7737	132.899	185.321	233.213	233.449	55.0901
acl-12	WBGene00015295	0.871449	0.00813099	0.0167149	346.379	247.537	327.668	573.17	509.103	603.236
acl-13	WBGene00008581	-5.72366	1.3e-05	4.5e-05	100.711	78.1163	53.7161	0	3.95676	0
acl-14	WBGene00019465	0.926373	0.00750352	0.0155281	448.354	286.765	417.643	649.747	714.855	826.351
acl-2	WBGene00011543	-1.9945	0.000229208	0.000641811	523.36	428.118	487.474	192.604	112.108	52.3356
acl-3	WBGene00006491	-5.10282	9.2e-11	6.37e-10	168.133	174.494	193.378	4.64105	9.23244	0
acl-4	WBGene00018657	2.60434	3.48e-11	2.53e-10	248.196	218.455	128.919	1250.76	969.407	1421.32
acl-5	WBGene00011106	-0.0703052	0.9208	0.939433	165.604	64.5897	178.606	60.3337	217.622	110.18
acl-6	WBGene00017261	-0.316265	0.632387	0.702306	176.56	262.417	71.1739	135.751	81.7731	195.57
acl-7	WBGene00012911	-0.611769	0.292633	0.37201	289.07	497.78	529.104	423.496	323.136	110.18
acl-8	WBGene00020264	0.820809	0.0121783	0.0239851	219.12	190.387	213.522	364.323	337.644	399.403
acl-9	WBGene00022646	-0.338528	0.298918	0.378952	520.832	409.181	527.761	345.758	436.563	369.104
acly-1	WBGene00206384	4.08186	0.306404	NA	0	0	0	0	5.27568	0
acly-2	WBGene00007150	-2.19469	3.16e-07	1.39e-06	603.845	354.398	721.139	114.866	122.66	129.462
acn-1	WBGene00000039	-11.7869	1.47e-20	2.94e-19	2614.27	1256.29	2265.48	0	0	2.7545
aco-1	WBGene00000040	-0.840109	0.0117892	0.0233221	1704.5	2053	2069.41	1111.53	1358.49	779.525
aco-2	WBGene00000041	-0.0375812	0.895872	0.920171	4157.39	4105.33	5409.21	3827.71	5200.5	4288.76
acox-1	WBGene00008564	-0.634209	0.182218	0.250487	548.643	236.378	441.815	197.245	309.946	283.714
acp-1	WBGene00022770	-0.0574556	0.938888	0.953578	60.6795	81.1598	88.6316	23.2053	92.3244	107.426
acp-2	WBGene00008802	-0.722222	0.116482	0.172604	253.674	212.706	335.726	131.11	131.892	225.869
acp-3	WBGene00008801	-6.56644	0.000539212	0.00141036	29.0756	32.4639	22.8294	0	0	0
acp-4	WBGene00008804	3.05377	0.00591435	0.012544	31.1825	22.3189	0	239.014	102.876	110.18
acp-5	WBGene00017427	-0.464433	0.405877	0.491211	230.919	172.126	102.061	142.712	145.081	77.1261
acp-6	WBGene00022245	1.03008	0.000554775	0.0014467	1968.71	1376.67	1995.55	3465.71	4124.26	3310.91
acp-7	WBGene00022246	-1.4828	0.300958	0.381231	64.0505	32.8021	16.1148	13.9232	0	27.545
acr-10	WBGene00000049	1.92861	0.608635	0.681658	7.58493	0	0	29.0066	0	0
acr-11	WBGene00000050	4.13661	0.0177524	0.033661	0	6.76332	0	19.7245	35.6109	71.6171
acr-12	WBGene00000051	4.0684	3.25e-18	5.12e-17	80.0632	54.4447	38.9442	657.869	929.839	1355.22
acr-14	WBGene00000053	2.61797	0.0545604	0.0906327	0	18.5991	34.9155	179.841	69.9028	74.3716
acr-15	WBGene00000054	1.94457	0.00131581	0.00319315	139.057	54.7829	132.947	206.527	618.574	429.703
acr-16	WBGene00000055	4.07544	1.76e-05	5.94e-05	30.3397	28.0678	0	277.303	389.082	341.558
acr-17	WBGene00000056	3.18546	2.81e-08	1.42e-07	67.0002	22.3189	65.8022	323.713	597.471	479.284
acr-18	WBGene00000057	3.5633	1.47e-23	3.86e-22	47.6165	51.7394	61.7735	677.594	523.611	688.626
acr-19	WBGene00000058	5.74618	6.76e-08	3.26e-07	0.421385	5.07249	45.6587	952.576	774.206	914.495
acr-2	WBGene00000042	4.16526	2.9e-05	9.41e-05	68.2644	41.5944	0	636.984	648.909	707.908
acr-20	WBGene00000059	4.24624	6.23e-06	2.26e-05	88.9123	32.4639	1.3429	498.913	855.979	999.885
acr-21	WBGene00000060	4.7632	5.56e-29	2.27e-27	21.4906	31.4494	26.8581	632.343	571.093	969.585
acr-23	WBGene00000062	5.28317	2.72e-06	1.04e-05	0	8.79231	16.1148	554.606	159.589	220.36
acr-24	WBGene00013534	3.4469	2.15e-11	1.61e-10	65.7361	55.4592	135.633	848.152	621.212	1302.88
acr-25	WBGene00043066	-0.377908	0.907875	0.929746	0	18.9373	0	0	11.8703	2.7545
acr-3	WBGene00000043	1.85963	0.00868501	0.0177319	24.8617	31.1113	69.831	78.8979	147.719	225.869
acr-5	WBGene00000044	4.61428	4.04e-09	2.27e-08	36.6605	4.39616	37.6013	368.964	520.974	1013.66
acr-6	WBGene00000045	7.29921	0.000104195	0.000310136	0.421385	0	0	11.6026	13.1892	77.1261
acr-7	WBGene00000046	-0.774741	0.657817	0.723805	0	19.2755	55.059	6.96158	11.8703	24.7905
acr-8	WBGene00000047	2.82191	5.06e-05	0.000157897	10.1132	37.5364	41.63	177.52	159.589	289.223
acr-9	WBGene00000048	4.62821	3.15e-05	0.000101676	0	15.5556	10.7432	245.976	183.33	217.606
acs-1	WBGene00018488	0.308257	0.319613	0.401316	979.299	879.569	774.855	1010.59	1329.47	920.004
acs-10	WBGene00007082	-9.47941	1.04e-12	9.11e-12	244.403	215.412	175.92	0	0	0
acs-11	WBGene00018269	-0.210127	0.691475	0.753325	362.391	323.963	139.662	232.053	308.627	173.534
acs-12	WBGene00009106	0.0485579	0.939459	0.95398	58.1511	86.9086	49.6874	59.1734	94.9623	46.8266
acs-13	WBGene00022037	0.62575	0.0575131	0.0947709	1012.17	698.651	632.507	1265.85	1081.51	1272.58
acs-14	WBGene00008669	0.733109	0.128511	0.186756	327.416	417.297	224.265	505.875	779.482	325.031
acs-15	WBGene00019920	-6.36311	0.0301647	0.0538192	0	37.1982	36.2584	0	0	0
acs-16	WBGene00018579	-1.29213	0.251933	0.328461	125.151	176.523	100.718	62.6542	100.238	0
acs-17	WBGene00016716	-0.500196	0.262835	0.340372	857.097	453.819	641.908	573.17	517.017	286.468
acs-18	WBGene00011173	-4.27674	0.00407874	0.00896372	59.4153	127.827	98.0319	0	0	16.527
acs-19	WBGene00007969	2.04579	8.52e-13	7.56e-12	1444.93	1538.32	1242.19	4650.33	6129.02	6679.67
acs-2	WBGene00009221	0.543254	0.206712	0.278506	1635.82	2297.5	1389.9	3334.6	2979.44	1440.61
acs-20	WBGene00009218	-4.67498	3.44e-15	3.97e-14	1234.24	509.278	954.804	15.0834	52.7568	38.5631
acs-21	WBGene00016849	5.2753	0.000314355	0.000860643	0	5.41065	0	118.347	54.0757	57.8446
acs-22	WBGene00017012	-0.871386	0.0234695	0.0430474	599.631	567.104	659.365	406.092	371.936	214.851
acs-3	WBGene00020343	-1.11888	0.207485	0.279365	84.277	182.271	124.89	59.1734	110.789	8.26351
acs-4	WBGene00018152	0.576013	0.0376456	0.0654824	1213.17	1124.74	903.774	1743.88	1581.39	1509.47
acs-5	WBGene00013575	-2.24686	0.000498318	0.00131031	666.631	416.62	418.986	129.949	155.633	27.545
acs-6	WBGene00022849	-7.22978	2.42e-06	9.32e-06	34.5536	126.812	99.3748	0	1.31892	0
acs-7	WBGene00007228	0.531318	0.437567	0.522417	87.6481	110.918	239.037	82.3787	305.99	242.396
acs-9	WBGene00020634	2.47359	0.513129	0.595588	0	4.73432	0	26.686	0	0
act-1	WBGene00000063	-2.29583	9.86e-10	6.01e-09	10000.3	7179.6	6291.5	1459.61	2168.31	1148.63
act-2	WBGene00000064	-0.793692	0.106898	0.160537	6807.9	4047.17	4739.1	1897.03	1965.19	5139.9
act-3	WBGene00000065	-1.65719	1.87e-05	6.27e-05	8678.43	6062.98	5941	1700.95	3157.5	1696.77
act-4	WBGene00000066	-1.38319	1.36e-06	5.47e-06	34519	25378	31527.3	11700.1	13629.7	9715.14
act-5	WBGene00000067	-1.01379	0.0326383	0.0576984	8537.26	10277.5	11467	2798.55	8521.54	3674.51
acy-1	WBGene00000068	3.86323	1.94e-24	5.56e-23	159.284	166.039	272.609	2402.9	2544.2	3710.32
acy-2	WBGene00000069	8.0269	2.87e-05	9.32e-05	0	11.1595	0	1033.79	997.104	977.849
acy-3	WBGene00000070	0.960338	0.0868717	0.134913	229.655	106.86	87.2887	310.95	327.092	187.306
acy-4	WBGene00000071	2.67951	2.94e-09	1.68e-08	66.5788	48.3577	34.9155	366.643	313.903	289.223
ada-2	WBGene00017967	-0.0539689	0.904435	0.927264	332.473	502.514	517.018	367.803	299.395	639.045
adbp-1	WBGene00012157	-0.994789	0.211581	0.284264	235.554	154.204	30.8868	83.5389	59.3514	68.8626
add-1	WBGene00000072	3.69155	5.92e-15	6.68e-14	42.9813	111.933	106.089	924.729	1102.62	1333.18
add-2	WBGene00000073	-0.329831	0.647406	0.715335	112.51	130.87	226.951	46.4105	96.2812	234.133
adm-2	WBGene00000074	1.10494	0.0611339	0.099897	385.146	116.329	119.518	524.439	414.141	399.403
adm-4	WBGene00000075	-0.718055	0.256705	0.333855	127.258	63.237	134.29	47.5708	93.6433	55.0901
ador-1	WBGene00011878	5.0855	5.8e-23	1.45e-21	85.5412	44.6379	28.201	1240.32	1688.22	2520.37
adpr-1	WBGene00044440	0.823999	0.312595	0.393785	18.9623	132.223	68.4881	175.2	76.4974	137.725
adr-1	WBGene00000079	1.23401	0.00766275	0.0158255	566.342	301.982	400.185	670.632	828.282	1490.19
adr-2	WBGene00000080	-3.06132	8.85e-06	3.14e-05	306.768	303.335	1412.73	78.8979	91.0055	71.6171
ads-1	WBGene00000081	0.26182	0.479546	0.563881	1523.31	1607.64	1438.25	2017.7	2331.85	1123.84
adsl-1	WBGene00011064	-1.50815	3.41e-05	0.000109371	737.003	497.104	696.967	265.7	220.26	190.061
adss-1	WBGene00016509	0.544703	0.144483	0.204983	2811.48	2757.74	2270.85	5399.86	3471.4	2561.69
adt-1	WBGene00000082	-2.54122	2.81e-05	9.15e-05	362.391	215.75	443.158	26.686	60.6703	90.8986
adt-2	WBGene00000083	-2.85957	1.92e-06	7.54e-06	964.55	591.452	1035.38	178.68	138.487	35.8086
aex-1	WBGene00000084	-0.655599	0.745177	0.798934	0	52.4157	32.2297	25.5258	27.6973	0
aex-2	WBGene00000085	3.48808	6.65e-15	7.44e-14	53.0945	34.1547	77.8884	534.881	586.92	702.399
aex-3	WBGene00000086	5.00462	5.05e-30	2.24e-28	65.7361	156.571	146.376	3208.13	3512.29	5084.81
aex-4	WBGene00006454	-0.94357	0.514171	0.596626	24.8617	59.8554	20.1435	0	27.6973	27.545
aex-5	WBGene00000088	1.90814	2.63e-05	8.58e-05	84.6984	185.653	202.778	598.696	589.557	581.2
aex-6	WBGene00000089	4.03654	9.06e-31	4.2e-29	291.598	212.368	224.265	3039.89	3649.45	5277.63
aexr-1	WBGene00016089	0.0403341	0.982434	0.986701	35.3963	4.05799	0	3.48079	26.3784	11.018
aexr-2	WBGene00016090	3.05884	0.0611759	0.0999561	0.84277	12.174	0	31.3271	72.5406	8.26351
aexr-3	WBGene00016748	3.0931	1.51e-05	5.14e-05	53.0945	9.46864	40.2871	206.527	385.125	280.959
afd-1	WBGene00021009	-0.144941	0.63298	0.702798	1198.42	1121.36	1651.77	1189.27	1109.21	1291.86
aff-1	WBGene00016625	0.219734	0.805245	0.848646	38.346	49.3722	56.4019	25.5258	23.7406	121.198
afmd-1	WBGene00017051	-1.44963	0.171419	0.237619	83.4342	31.4494	24.1723	32.4874	11.8703	5.50901
age-1	WBGene00000090	0.970812	0.0153047	0.0294643	161.39	140.677	194.721	409.573	286.206	272.696
agef-1	WBGene00012386	0.762816	0.0408049	0.0702731	288.649	310.098	319.611	389.848	481.406	691.381
agl-1	WBGene00011050	2.44107	2.18e-14	2.31e-13	438.24	352.369	298.124	2155.77	1613.04	2156.78
agmo-1	WBGene00007210	-7.22263	3.14e-40	2.92e-38	1479.48	881.26	1199.21	8.12184	9.23244	5.50901
agr-1	WBGene00018304	2.61193	1.04e-06	4.27e-06	109.982	68.9858	225.608	603.337	841.471	1010.9
ags-3	WBGene00000092	3.73838	8.35e-28	3.14e-26	364.919	287.103	519.703	4977.53	4621.5	5991.05
agt-1	WBGene00000093	-2.30052	0.00350279	0.00780076	261.68	259.711	236.351	112.545	17.146	22.036
agt-2	WBGene00000094	-0.872192	0.204601	0.276237	62.7864	116.329	221.579	46.4105	79.1352	93.6531
AH6.3	WBGene00007081	-11.3811	2.44e-18	3.87e-17	460.574	772.033	1146.84	0	0	0
AH9.1	WBGene00014998	4.81054	0.042329	0.0725807	32.4467	0	0	413.054	208.389	294.732
AH9.3	WBGene00014999	0.480312	0.459943	0.544932	52.2518	104.155	213.522	155.475	141.124	217.606
AH9.4	WBGene00015000	4.14222	0.000216044	0.000607993	34.975	4.39616	0	220.45	209.708	280.959
AH9.6	WBGene00044701	5.23001	3.95e-36	2.75e-34	83.4342	41.9326	103.404	3229.01	2612.78	2638.81
AH9.7	WBGene00175029	1.16516	0.696546	0.757707	0	13.1885	0	16.2437	0	13.7725
AH9.9	WBGene00219776	1.1132	0.614154	0.686492	32.868	0	0	30.1668	35.6109	5.50901
aha-1	WBGene00000095	3.06796	6.62e-13	5.95e-12	116.724	196.136	103.404	992.025	960.174	1559.05
ahcy-1	WBGene00019322	-3.57944	1.06e-52	2.19e-50	45948.7	43638.9	41936.2	4101.53	3509.65	3388.04
aho-3	WBGene00045192	1.87071	0.000142298	0.000413749	297.076	257.344	146.376	675.273	585.601	1313.9
ahr-1	WBGene00000096	-3.04892	1.16e-06	4.7e-06	1142.37	1595.47	3980.36	452.503	131.892	225.869
ain-1	WBGene00015547	2.91667	1.13e-28	4.53e-27	727.732	867.734	719.796	5626.11	5244.03	6627.34
ain-2	WBGene00015007	1.33831	3.53e-06	1.33e-05	1257.83	882.275	968.233	2518.93	2458.47	2886.72
aip-1	WBGene00000097	0.901791	0.101734	0.153838	527.996	550.534	547.904	544.163	602.747	1897.85
aipl-1	WBGene00010685	-1.37466	6.79e-05	0.000208024	419.7	412.562	492.845	184.482	145.081	181.797
air-1	WBGene00000098	-2.67013	4.43e-07	1.91e-06	289.492	330.726	217.55	25.5258	55.3947	52.3356
air-2	WBGene00000099	-3.47401	1.7e-05	5.74e-05	64.0505	163.672	79.2313	10.4424	6.5946	11.018
ajm-1	WBGene00000100	-0.929681	0.0437992	0.0747765	2214.38	3691.76	6546.65	2190.58	2602.23	1740.85
aka-1	WBGene00000101	0.179211	0.722318	0.779485	371.662	406.137	208.15	259.899	292.8	570.182
akap-1	WBGene00016977	3.32121	1.68e-25	5.33e-24	1646.77	1839.96	1935.12	14651.8	15419.5	24118.4
akir-1	WBGene00017088	0.730435	0.0227452	0.0418782	825.915	788.265	698.31	1069.76	1130.31	1644.44
akt-1	WBGene00000102	2.7852	8.15e-25	2.43e-23	688.122	639.472	525.075	3806.82	4694.04	4288.76
akt-2	WBGene00000103	3.43931	7.12e-18	1.09e-16	229.233	246.185	406.9	2175.49	3648.13	3715.83
aldo-1	WBGene00011474	2.20452	1.35e-07	6.22e-07	5546.69	5067.42	5086.92	12868.5	24115.1	35392.6
aldo-2	WBGene00017166	-1.50666	0.000210915	0.000594717	12974.4	13558.8	12702.5	5106.32	6258.28	2437.74
alfa-1	WBGene00017547	-2.24264	1.27e-05	4.37e-05	363.655	218.117	394.813	96.3018	58.0325	49.5811
alg-1	WBGene00000105	3.14326	3.47e-12	2.87e-11	547.379	476.137	233.665	2892.54	3026.92	5217.03
alg-2	WBGene00000106	1.23754	0.00146875	0.00353265	286.12	232.32	337.069	606.817	513.06	897.968
alg-3	WBGene00011910	-6.01432	2.88e-08	1.46e-07	171.925	237.731	115.49	6.96158	0	0
alg-4	WBGene00006449	-10.1529	4.37e-15	4.98e-14	409.586	318.552	286.038	0	0	0
alh-1	WBGene00000107	-0.844544	0.0545807	0.090646	2665.26	3286.63	3134.34	2359.97	1859.68	834.615
alh-10	WBGene00000116	-3.34499	0.000194752	0.000553008	179.51	187.006	217.55	19.7245	35.6109	0
alh-11	WBGene00000117	2.26246	6.26e-08	3.04e-07	83.4342	174.155	118.175	583.612	586.92	636.29
alh-12	WBGene00000118	-1.55091	7.08e-05	0.000216255	1133.95	1155.85	1461.08	377.085	601.428	297.486
alh-13	WBGene00011938	-5.43794	8.51e-22	1.94e-20	1028.18	827.492	910.488	24.3655	6.5946	35.8086
alh-2	WBGene00000108	3.23054	0.423525	NA	0	0	0	0	2.63784	0
alh-3	WBGene00000109	-0.449709	0.188694	0.2581	728.996	670.583	542.533	392.169	584.282	446.23
alh-4	WBGene00000110	-1.26375	4.75e-05	0.000149263	1916.04	1598.85	1692.06	669.472	903.46	592.218
alh-5	WBGene00000111	0.25316	0.72204	0.779233	162.233	117.344	178.606	155.475	335.006	52.3356
alh-6	WBGene00000112	1.4736	1.66e-06	6.59e-06	889.544	732.467	824.542	1863.38	2835.68	2093.42
alh-7	WBGene00000113	0.2463	0.493711	0.576861	907.663	543.433	1017.92	1007.11	935.115	983.358
alh-8	WBGene00000114	-0.854364	0.0702619	0.112627	14483.4	14008.5	14123.3	11492.4	8753.67	3319.18
alh-9	WBGene00000115	-2.9213	7.82e-12	6.19e-11	1443.67	1149.43	825.885	179.841	174.097	93.6531
alkb-8	WBGene00007581	0.263193	0.662172	0.727433	160.969	245.17	84.6029	264.54	114.746	212.097
alp-1	WBGene00001132	-1.60137	0.000201836	0.00057144	1445.35	1164.64	1082.38	261.059	613.298	341.558
alr-1	WBGene00044330	4.88589	8.38e-07	3.48e-06	77.5349	81.1598	0	1551.27	1491.7	1688.51
alx-1	WBGene00007010	0.0670805	0.824577	0.864712	843.613	912.71	1095.81	834.229	1003.7	1151.38
aly-1	WBGene00000120	0.0618662	0.885188	0.911301	310.982	270.533	188.006	213.488	247.957	347.068
aly-2	WBGene00000121	-2.28152	3e-07	1.32e-06	521.253	569.809	772.169	98.6223	98.919	190.061
aly-3	WBGene00000122	1.33036	0.000932326	0.00232733	789.254	878.217	1580.6	2232.35	2516.5	3412.83
ama-1	WBGene00000123	1.41263	1.43e-06	5.71e-06	583.197	743.627	762.769	2134.88	1627.55	1795.94
aman-1	WBGene00018877	-3.71151	5.81e-05	0.000179666	282.328	111.595	174.577	15.0834	26.3784	0
aman-2	WBGene00010284	-2.04653	4.24e-08	2.1e-07	2566.66	2310.35	3799.07	562.727	613.298	928.268
aman-3	WBGene00018594	1.56026	0.00395885	0.008729	142.428	68.3095	89.9745	335.316	174.097	380.122
ampd-1	WBGene00016415	1.92403	5.13e-10	3.25e-09	1889.91	1156.53	1333.5	5923.14	5513.09	5186.73
amph-1	WBGene00010272	-0.293127	0.429246	0.514719	683.487	648.264	819.171	598.696	404.909	754.734
amt-1	WBGene00000133	-7.56877	1.31e-05	4.5e-05	101.975	45.3142	21.4864	0	0	0
amt-2	WBGene00000134	7.10222	3.34e-11	2.44e-10	0	4.73432	0	249.457	249.276	264.432
amt-3	WBGene00000135	4.08399	4.55e-19	7.8e-18	77.1135	42.2707	76.5455	688.036	1384.87	1231.26
amt-4	WBGene00000136	0.0267711	0.960185	0.970311	530.945	344.929	511.646	657.869	557.903	192.815
amx-1	WBGene00000137	0.945976	0.147987	0.209286	55.6228	49.3722	150.405	165.918	113.427	209.342
amx-2	WBGene00000138	-1.28974	0.00570216	0.0121333	1173.56	462.273	737.254	352.72	370.617	245.151
amx-3	WBGene00000139	-1.32423	0.138474	0.197964	73.321	75.7491	25.5152	19.7245	38.2487	11.018
anat-1	WBGene00015938	2.38828	6.15e-13	5.58e-12	514.511	324.977	366.613	1765.92	2238.21	2316.54
anc-1	WBGene00000140	-0.482976	0.285835	0.36447	786.305	907.637	1533.6	559.247	634.401	1118.33
angl-1	WBGene00020955	0.334026	0.62053	0.692165	153.806	170.774	48.3445	136.911	234.768	99.1621
ani-1	WBGene00013038	-1.93059	0.00155346	0.00372195	159.705	396.33	264.552	96.3018	36.9298	82.6351
ani-2	WBGene00019608	-3.15298	2.42e-06	9.34e-06	169.818	302.658	183.978	38.2887	10.5514	24.7905
ani-3	WBGene00012835	-4.20491	0.00161648	0.00385803	225.02	146.764	163.834	27.8463	0	0
anmt-1	WBGene00015124	-1.71497	0.19489	0.265237	42.5599	59.8554	22.8294	6.96158	30.3352	0
anmt-2	WBGene00018340	-3.8423	5.03e-05	0.000157158	519.146	585.027	389.442	24.3655	77.8163	0
anmt-3	WBGene00011573	-1.49001	0.0133862	0.0261307	561.285	552.225	346.469	194.924	263.784	57.8446
anoh-1	WBGene00010138	7.34949	6.88e-10	4.27e-09	0	6.76332	0	150.834	378.53	702.399
anoh-2	WBGene00013326	4.13669	9.57e-19	1.58e-17	27.8114	72.0293	44.3158	778.536	784.758	986.112
anr-1	WBGene00219738	-0.503565	0.899304	NA	0	2.36716	0	0	0	2.7545
anr-10	WBGene00219663	-5.54047	0.0188322	0.0354105	16.8554	12.5121	12.0861	0	0	0
anr-14	WBGene00219557	6.67318	0.0574885	0.0947435	0	0	0	0	7.91352	24.7905
anr-16	WBGene00219587	-4.96036	0.179653	0.247333	23.5976	4.05799	0	0	0	0
anr-18	WBGene00219715	5.2095	0.186744	NA	0	0	0	11.6026	0	0
anr-19	WBGene00219760	5.52354	0.160752	NA	0	0	0	0	14.5081	0
anr-2	WBGene00219623	-2.42466	0.255788	0.332787	2.9497	12.5121	30.8868	8.12184	0	0
anr-20	WBGene00219581	-0.0402904	0.98491	0.988386	30.7611	5.74882	0	11.6026	23.7406	0
anr-21	WBGene00219658	-3.02233	0.44212	NA	7.16355	0	0	0	0	0
anr-22	WBGene00219679	5.67349	0.149372	0.210439	0	0	0	0	0	16.527
anr-23	WBGene00219717	2.88788	0.187236	0.256389	0	7.43965	0	5.80131	7.91352	44.0721
anr-27	WBGene00219647	6.25326	0.0950443	0.145366	0	0	0	6.96158	17.146	0
anr-3	WBGene00219627	6.52048	0.0712189	0.11395	0	0	0	20.8847	0	8.26351
anr-32	WBGene00219683	-4.69468	0.0575952	0.0948652	22.3334	49.7104	0	2.32053	0	0
anr-33	WBGene00219668	-1.65185	0.677424	NA	0	2.70533	0	0	0	0
anr-34	WBGene00219701	7.18308	0.0275386	0.0495518	0	0	0	0	5.27568	41.3176
anr-35	WBGene00219589	-0.761185	0.440192	0.524984	20.6479	21.3044	73.8597	27.8463	27.6973	11.018
anr-36	WBGene00219659	4.07646	0.0184959	0.034858	0	7.10148	0	26.686	67.2649	33.054
anr-38	WBGene00219703	3.98808	0.216799	0.29002	0	1.0145	0	10.4424	9.23244	0
anr-4	WBGene00219671	-3.13653	0.424843	NA	6.74216	1.0145	0	0	0	0
anr-42	WBGene00219766	-2.35938	0.50233	0.584894	0	0	55.059	0	10.5514	0
anr-43	WBGene00219583	4.54453	0.252112	NA	0	0	0	4.64105	2.63784	0
anr-45	WBGene00219710	5.91463	0.000183479	0.000522969	0	2.029	0	81.2184	46.1622	16.527
anr-47	WBGene00219764	-4.43601	0.257349	0.334592	0	0.676332	18.8006	0	0	0
anr-48	WBGene00219656	4.39859	0.268437	NA	0	0	0	0	6.5946	0
anr-49	WBGene00219711	4.65796	0.239926	NA	0	0	0	0	7.91352	0
anr-5	WBGene00219705	-5.29557	0.129106	0.18724	31.1825	3.71982	0	0	0	0
anr-50	WBGene00219752	6.26706	0.110388	0.164836	0	0	0	0	0	24.7905
anr-52	WBGene00219642	-3.63944	0.281803	0.359958	0	3.04349	18.8006	0	0	2.7545
anr-54	WBGene00219672	7.01097	0.0735499	0.116957	0	0	0	0	0	41.3176
anr-57	WBGene00219603	-4.98928	0.202329	0.273557	28.2328	0	0	0	0	0
anr-6	WBGene00219681	5.52354	0.160752	NA	0	0	0	0	14.5081	0
anr-7	WBGene00219607	7.78486	0.000468035	0.00123763	0	0	0	4.64105	46.1622	19.2815
anr-8	WBGene00219575	0.132538	0.848592	0.883061	26.1259	52.0775	64.4593	46.4105	56.7136	52.3356
anr-9	WBGene00219568	4.03858	0.311864	NA	0	0	0	0	0	5.50901
ant-1.1	WBGene00006439	-0.37828	0.274415	0.352682	52389.5	56782.1	50549.6	48066.2	48945.1	25864.8
ant-1.2	WBGene00007057	4.87766	0.217551	NA	0	0	0	0	9.23244	0
ant-1.3	WBGene00010485	-10.3942	3.31e-16	4.23e-15	420.964	411.548	366.613	0	0	0
ant-1.4	WBGene00020140	-7.0977	1.08e-14	1.18e-13	361.97	341.209	268.581	5.80131	0	0
aos-1	WBGene00000142	0.217188	0.608131	0.681314	169.397	314.832	218.893	274.982	241.362	302.995
apa-2	WBGene00000161	2.97114	8.92e-17	1.21e-15	857.097	554.254	586.849	4050.48	4841.76	6789.85
apb-1	WBGene00000160	2.56551	1.4e-17	2.07e-16	637.134	686.815	875.573	3538.8	4515.98	4952.6
apb-3	WBGene00000163	-1.02538	0.0118799	0.0234755	1976.3	2506.49	4457.1	1357.51	1288.59	1746.36
apc-10	WBGene00000144	-6.00485	1.89e-05	6.34e-05	53.9373	87.585	53.7161	0	2.63784	0
apc-11	WBGene00000145	-0.488367	0.358353	0.442306	129.787	159.276	77.8884	93.9813	88.3677	79.8806
apc-17	WBGene00007501	0.0616254	0.98089	0.985664	24.0189	0	0	1.16026	13.1892	11.018
apc-2	WBGene00000143	0.176602	0.688545	0.750863	111.246	131.547	114.147	142.712	108.151	154.252
apd-3	WBGene00000162	0.250412	0.526066	0.607829	1895.39	2403.01	4134.8	3327.63	2809.3	3892.11
ape-1	WBGene00000146	0.0604033	0.832889	0.871268	582.354	688.844	569.391	667.151	667.374	583.955
apg-1	WBGene00000158	0.902359	0.0125496	0.0246558	520.411	721.308	854.086	1067.44	1200.22	1649.95
aph-1	WBGene00000147	1.02717	0.0890424	0.137704	332.473	168.407	91.3174	498.913	238.725	473.775
aph-2	WBGene00000148	1.46275	0.000140777	0.000409808	104.925	85.8941	112.804	307.47	271.698	253.414
apl-1	WBGene00000149	2.56432	1.01e-15	1.23e-14	4548.85	3153.73	3408.29	18238.2	19865.6	27624.9
apm-1	WBGene00000150	-2.03382	1.48e-09	8.83e-09	1120.04	1191.36	875.573	307.47	258.508	209.342
apm-3	WBGene00000164	2.2012	6.94e-09	3.79e-08	88.4909	126.474	134.29	481.509	482.725	639.045
apn-1	WBGene00000151	-0.510741	0.224588	0.298624	273.058	246.185	448.53	240.174	205.752	231.378
app-1	WBGene00000155	-1.55647	0.00124135	0.00302812	840.242	756.815	455.244	255.258	309.946	129.462
apr-1	WBGene00000156	1.87391	5.64e-06	2.06e-05	103.239	204.59	139.662	498.913	547.352	597.727
aps-1	WBGene00000159	-0.331407	0.35839	0.442319	442.033	569.471	436.443	300.508	381.168	473.775
aps-2	WBGene00000157	1.5044	1.91e-05	6.39e-05	565.499	380.098	449.873	993.185	1388.82	1581.09
aps-3	WBGene00000165	-0.33815	0.490013	0.573429	1428.92	904.255	2288.31	927.05	907.417	1823.48
apt-9	WBGene00000166	5.33808	7.87e-32	4.03e-30	35.3963	36.8601	36.2584	963.018	1143.5	2288.99
aptf-1	WBGene00019424	6.18704	1.29e-06	5.22e-06	0	15.5556	0	374.765	382.487	435.212
aptf-2	WBGene00013383	0.487465	0.730872	0.787002	93.9689	27.3914	0	23.2053	76.4974	71.6171
aptf-3	WBGene00009203	-1.73166	0.0344304	0.0604843	64.4719	39.9036	100.718	11.6026	18.4649	33.054
aptf-4	WBGene00009202	4.18618	0.00873256	0.0178122	22.7548	0	0	95.1416	139.806	187.306
apx-1	WBGene00000168	-5.03268	3.83e-10	2.46e-09	188.781	143.72	157.12	8.12184	1.31892	5.50901
apy-1	WBGene00017244	-2.83578	2.76e-14	2.9e-13	2519.46	1614.74	2057.33	204.206	305.99	360.84
aqp-1	WBGene00000169	0.157334	0.76958	0.818908	526.731	509.616	369.298	679.914	680.563	203.833
aqp-10	WBGene00000178	-2.53902	9.39e-09	5.04e-08	2275.06	2294.79	2045.24	442.06	509.103	181.797
aqp-11	WBGene00000179	-2.72779	3.75e-07	1.64e-06	1087.59	944.497	1298.59	95.1416	300.714	104.671
aqp-12	WBGene00013272	3.69184	0.035499	0.0621285	0	12.174	0	29.0066	38.2487	96.4076
aqp-2	WBGene00000170	2.5887	5.38e-10	3.39e-09	1802.26	756.477	1376.48	9594.21	6034.06	8040.4
aqp-3	WBGene00000171	5.265	0.181932	NA	0	0	0	8.12184	3.95676	0
aqp-4	WBGene00000172	-0.534185	0.184459	0.253086	260.416	266.137	402.871	199.565	249.276	190.061
aqp-5	WBGene00000173	4.3289	0.00681215	0.0142401	26.1259	0	0	117.187	305.99	110.18
aqp-6	WBGene00000174	3.39692	5.26e-06	1.93e-05	26.1259	18.9373	20.1435	67.2952	213.665	410.421
aqp-7	WBGene00000175	0.731583	0.19272	0.262593	5311.98	2811.85	4118.68	2868.17	5160.94	12304.4
aqp-8	WBGene00000176	-4.70113	6.32e-15	7.1e-14	1199.68	655.365	678.166	52.2118	11.8703	33.054
aqp-9	WBGene00000177	-0.66585	0.306753	0.387412	184.567	79.8071	111.461	45.2503	117.384	74.3716
arc-1	WBGene00000180	1.83836	1.61e-05	5.45e-05	101.975	169.421	214.864	618.42	485.363	628.027
ard-1	WBGene00000181	-1.47682	7.72e-05	0.00023431	2173.08	2005.32	2201.02	732.126	1059.09	495.811
arf-1.1	WBGene00000190	-10.2759	6.4e-15	7.18e-14	506.083	247.199	351.841	0	0	0
arf-1.2	WBGene00000182	-0.227621	0.443499	0.528372	5336.42	4726.54	4152.26	3374.04	3754.97	5018.71
arf-3	WBGene00000183	-0.792953	0.00191235	0.00449003	4447.72	4502	4859.97	3095.58	2433.41	2437.74
arf-6	WBGene00000184	1.18608	0.00146716	0.00352932	258.73	386.862	226.951	623.061	609.341	760.243
ari-1	WBGene00016158	0.57532	0.0533804	0.0889964	356.492	369.615	312.896	502.394	553.947	493.056
arid-1	WBGene00044689	2.93688	4.38e-07	1.89e-06	58.5725	147.44	233.665	894.563	813.774	1644.44
ark-1	WBGene00000186	0.298386	0.430386	0.515869	477.429	503.529	882.287	763.453	743.871	779.525
arl-1	WBGene00000187	-0.104123	0.768369	0.817984	455.939	498.118	406.9	327.194	415.46	528.865
arl-13	WBGene00021349	4.55573	8.97e-05	0.000269318	0	8.45415	22.8294	204.206	170.141	336.049
arl-5	WBGene00000189	-0.710534	0.269535	0.347519	144.114	105.508	65.8022	37.1284	75.1785	82.6351
arl-6	WBGene00000193	4.33263	0.00685722	0.0143205	27.8114	0	0	91.6608	155.633	322.277
arl-7	WBGene00000191	-7.06854	NA	NA	0.421385	119.034	0	0	0	0
arl-8	WBGene00000192	0.427107	0.11331	0.168532	1085.07	841.695	964.204	1222.92	1296.5	1368.99
arp-1	WBGene00013168	0.122856	0.711577	0.770243	688.965	614.109	635.193	865.556	531.525	713.417
arp-11	WBGene00016793	-0.436914	0.300891	0.381174	331.209	219.47	226.951	154.315	230.811	190.061
arp-6	WBGene00007434	-0.651563	0.145116	0.20578	201.843	135.266	161.148	92.821	114.746	110.18
arr-1	WBGene00000195	2.4018	4.19e-09	2.35e-08	197.208	155.556	330.354	1004.79	1249.02	1338.69
arrd-10	WBGene00010268	-2.59643	0.0108329	0.0216185	298.762	166.039	126.233	51.0516	44.8433	0
arrd-11	WBGene00011052	0.580132	0.837981	0.874976	0	22.3189	0	16.2437	17.146	0
arrd-12	WBGene00011053	-4.33805	0.268087	0.345754	0	17.9228	0	0	0	0
arrd-13	WBGene00011054	-1.35097	0.0581236	0.0955865	210.693	237.054	388.099	154.315	145.081	24.7905
arrd-14	WBGene00011055	1.04733	0.0801418	0.125824	179.51	61.8843	87.2887	171.719	312.584	195.57
arrd-15	WBGene00014033	3.50009	2.38e-05	7.82e-05	8.84909	27.0533	119.518	495.432	667.374	567.428
arrd-16	WBGene00013043	3.85255	3.77e-06	1.41e-05	55.2014	9.46864	34.9155	131.11	436.563	870.423
arrd-17	WBGene00011732	4.35917	3.74e-64	1.44e-61	384.303	309.084	381.384	7263.25	6776.61	7990.82
arrd-18	WBGene00018060	2.42442	0.000166255	0.000477246	212.799	68.9858	115.49	1267.01	369.298	495.811
arrd-19	WBGene00018061	2.03598	0.00150651	0.00361646	20.2265	69.324	38.9442	210.008	145.081	173.534
arrd-20	WBGene00015440	3.51971	0.0363893	0.0634818	0	28.0678	0	168.238	71.2217	88.1441
arrd-21	WBGene00015441	0.697532	0.624337	0.695561	23.5976	20.29	17.4577	80.0581	18.4649	0
arrd-22	WBGene00020612	0.357112	0.616271	0.688299	57.7298	81.1598	24.1723	73.0966	81.7731	55.0901
arrd-23	WBGene00020323	1.39523	0.380916	0.465943	52.2518	0	18.8006	68.4555	104.195	13.7725
arrd-24	WBGene00009852	0.0491091	0.983821	0.987636	0	1.35266	33.5726	13.9232	0	22.036
arrd-25	WBGene00007296	2.20664	1.97e-12	1.68e-11	398.63	510.969	604.306	2214.94	2062.79	2702.17
arrd-26	WBGene00019873	4.07933	7.81e-24	2.1e-22	89.755	73.0438	55.059	1226.4	1614.36	867.669
arrd-27	WBGene00009853	3.91339	0.328027	NA	0	0	0	4.64105	0	0
arrd-28	WBGene00009000	3.85016	0.0298471	0.0533293	0	0	22.8294	83.5389	142.443	90.8986
arrd-3	WBGene00006429	-0.479924	0.904891	NA	0	1.0145	0	0	0	0
arrd-4	WBGene00014159	5.5778	1.01e-27	3.75e-26	21.4906	22.9953	55.059	1055.84	1448.17	2104.44
arrd-5	WBGene00014161	6.31872	1.75e-06	6.9e-06	0	3.04349	0	91.6608	143.762	49.5811
arrd-6	WBGene00009579	3.99338	1.25e-13	1.23e-12	214.485	54.1065	193.378	2202.18	2193.36	2941.81
arrd-7	WBGene00012464	-1.70239	0.0026509	0.006064	151.699	235.363	179.949	35.9681	85.7298	52.3356
arrd-8	WBGene00012467	1.98402	0.491978	0.575224	0	10.145	0	8.12184	0	33.054
arrd-9	WBGene00008843	-5.31311	0.0681706	0.109721	0.421385	5.74882	29.5439	0	0	0
art-1	WBGene00000198	-0.81744	0.00171677	0.00407217	1852.83	1770.3	2090.9	1189.27	979.958	1071.5
arx-1	WBGene00000199	0.519034	0.101572	0.153669	619.436	567.104	837.971	1054.68	977.32	862.16
arx-2	WBGene00000200	-0.737598	0.0103002	0.0206839	856.676	1064.55	823.2	568.529	527.568	550.901
arx-3	WBGene00000201	0.64981	0.0447631	0.076167	638.398	988.121	827.228	1463.09	1276.71	1107.31
arx-4	WBGene00021170	0.147721	0.721036	0.778344	527.153	398.359	766.798	665.991	745.19	457.248
arx-5	WBGene00000203	-0.394014	0.358833	0.442772	410.429	301.306	212.179	263.38	199.157	242.396
arx-6	WBGene00000204	-0.843205	0.00868732	0.0177346	734.053	809.569	705.024	360.842	377.211	520.601
arx-7	WBGene00000205	-0.861367	0.0565955	0.0935028	300.448	302.32	226.951	203.046	149.038	101.917
asah-1	WBGene00010769	1.28717	0.00219848	0.00510038	430.656	309.084	394.813	1276.29	919.288	567.428
asb-1	WBGene00000206	-1.99797	9.74e-09	5.21e-08	1085.49	776.767	808.428	230.892	255.871	179.043
asb-2	WBGene00000207	-0.786428	0.0116476	0.0230717	8370.39	8827.14	8027.87	4686.3	6289.93	3644.21
asc-1	WBGene00000208	0.480798	0.258663	0.335948	184.567	365.895	236.351	416.534	335.006	347.068
asd-1	WBGene00011279	3.4401	1.59e-29	6.75e-28	279.378	228.262	206.807	3052.65	2201.28	2517.62
asd-2	WBGene00006423	-0.170781	0.656785	0.723073	1162.18	1006.72	1846.49	985.063	1081.51	1501.2
asfl-1	WBGene00007277	-9.16136	5.76e-11	4.08e-10	248.196	112.947	149.062	0	0	0
asg-1	WBGene00000209	-3.17347	3.89e-25	1.19e-23	2490.81	2599.14	2665.66	221.61	346.876	291.977
asg-2	WBGene00000210	-1.81023	7.6e-09	4.13e-08	6236.92	6479.6	6406.99	1779.84	2329.21	1338.69
ash-2	WBGene00012458	1.71833	4.68e-05	0.000147184	256.202	261.402	178.606	610.298	589.557	1101.8
asic-1	WBGene00022815	1.64905	0.00584189	0.0124017	116.302	36.5219	92.6603	190.283	332.368	245.151
asic-2	WBGene00012137	3.82297	0.000422332	0.00112764	12.6416	19.9518	0	56.8529	216.303	203.833
asm-1	WBGene00000211	-3.24846	9.46e-12	7.42e-11	353.542	244.832	256.494	29.0066	32.973	27.545
asm-2	WBGene00000212	0.393303	0.540713	0.620903	162.655	57.4882	87.2887	190.283	126.616	85.3896
asm-3	WBGene00000213	-1.04476	0.458654	0.543553	61.9436	8.79231	36.2584	33.6476	17.146	0
asna-1	WBGene00014025	0.35471	0.274623	0.352793	620.7	1010.78	863.487	1022.19	1020.84	1148.63
asna-2	WBGene00018577	2.40987	0.52413	0.605953	0	4.73432	0	25.5258	0	0
asns-1	WBGene00003816	-5.29278	1.65e-09	9.77e-09	240.189	313.142	315.582	17.4039	2.63784	0
asns-2	WBGene00019730	-0.33237	0.644661	0.713165	344.272	263.431	487.474	105.584	615.936	145.989
asp-1	WBGene00000214	-1.36556	0.00537886	0.0114947	67462.9	96475.7	72629.6	47080	31746.4	12976.5
asp-10	WBGene00007605	-2.0154	8.08e-06	2.88e-05	653.147	448.07	361.241	147.353	85.7298	129.462
asp-11	WBGene00017677	-5.67549	0.0855802	0.133157	0	10.8213	34.9155	0	0	0
asp-12	WBGene00017678	-4.17196	3.39e-12	2.81e-11	1195.47	881.26	1195.18	70.776	17.146	96.4076
asp-13	WBGene00017881	-5.12442	1.23e-11	9.46e-11	3089.17	2932.24	2875.16	68.4555	175.416	8.26351
asp-14	WBGene00019619	-2.22802	1.4e-06	5.62e-06	4572.03	5324.76	3819.22	1256.56	1225.28	440.721
asp-16	WBGene00012682	7.95696	0.0060279	0.0127515	0	0	0	0	7.91352	71.6171
asp-17	WBGene00012683	-4.88171	5.75e-05	0.000177977	119.252	121.402	60.4306	0	1.31892	11.018
asp-2	WBGene00000215	-3.15956	1.45e-17	2.14e-16	18995.2	19293	18838.2	2122.12	2954.38	1311.14
asp-3	WBGene00000216	-1.65091	4e-05	0.000126719	26216.1	25327.3	25249.3	10308.9	9847.06	4291.52
asp-4	WBGene00000217	-3.65167	4.75e-07	2.04e-06	5777.19	4089.44	5237.32	627.702	520.974	49.5811
asp-5	WBGene00000218	-1.7635	3.84e-06	1.44e-05	17969.5	23626	18007	7627.57	6415.23	3506.48
asp-6	WBGene00000219	-1.32498	0.00363658	0.00808418	37484.3	58839.8	40805.5	24754.2	21189.8	8786.87
asp-7	WBGene00019104	1.14375	0.763106	0.81353	0	5.74882	0	12.7629	0	0
asp-8	WBGene00019105	-2.82712	0.000551199	0.00143803	1216.54	1241.74	934.661	201.886	262.465	11.018
asp-9	WBGene00015700	2.80263	0.0560348	0.092722	0	8.45415	22.8294	110.225	83.092	19.2815
aspm-1	WBGene00008107	-5.70757	3.96e-05	0.000125693	77.1135	172.465	30.8868	4.64105	0	0
ast-1	WBGene00020368	5.01034	1.24e-27	4.59e-26	188.359	60.1935	127.576	4366.07	4043.81	3699.3
atad-3	WBGene00010015	-1.0205	0.0303544	0.0541132	493.863	526.186	496.874	125.308	316.541	308.504
atat-2	WBGene00021059	3.41326	9.56e-22	2.17e-20	109.139	132.223	91.3174	1021.03	1040.63	1506.71
atf-2	WBGene00000220	-1.75007	0.0498178	0.0838548	224.177	62.5607	56.4019	41.7695	11.8703	49.5811
atf-5	WBGene00000221	-0.750716	0.0126496	0.0248212	1172.29	889.038	1259.64	612.619	706.941	652.817
atf-6	WBGene00000222	3.2203	0.0038675	0.00854278	0.421385	72.0293	44.3158	459.464	278.292	349.822
atf-7	WBGene00000223	2.84545	1.13e-16	1.51e-15	1468.53	1298.89	978.976	7220.32	7881.87	11847.1
atf-8	WBGene00017535	-3.25451	0.0443116	0.07551	63.6291	142.706	94.0032	0	0	33.054
atfs-1	WBGene00013878	0.780341	0.0562107	0.0929493	1080.85	586.38	917.203	1179.99	1221.32	2041.09
atg-10	WBGene00008427	-4.28289	0.274269	0.352548	0	17.2465	0	0	0	0
atg-11	WBGene00020334	2.99636	5.93e-16	7.38e-15	125.573	181.595	135.633	1053.52	954.898	1537.01
atg-13	WBGene00017045	1.68703	8.96e-08	4.25e-07	268.844	243.479	318.268	768.094	875.763	1027.43
atg-16.1	WBGene00017178	2.46425	2.34e-05	7.71e-05	32.4467	80.4835	48.3445	211.168	241.362	443.475
atg-16.2	WBGene00019427	0.371376	0.250416	0.327014	321.095	316.861	286.038	421.175	338.963	437.966
atg-18	WBGene00018294	2.25045	2.21e-15	2.61e-14	980.563	755.124	739.94	3607.26	3677.15	4506.37
atg-2	WBGene00019748	-0.00284796	0.995626	0.997394	876.902	928.942	1329.47	576.651	728.044	1828.99
atg-3	WBGene00021922	0.738899	0.0196355	0.0367456	384.725	476.137	500.903	842.351	796.628	628.027
atg-4.1	WBGene00013595	0.888517	0.0248011	0.0451649	195.523	345.267	213.522	510.516	444.476	443.475
atg-4.2	WBGene00014080	1.10471	0.0732042	0.116539	115.46	80.4835	34.9155	176.36	126.616	198.324
atg-5	WBGene00022152	1.27026	0.00819307	0.0168246	146.642	222.513	120.861	320.233	302.033	567.428
atg-7	WBGene00010882	1.58468	0.00318623	0.00716756	226.705	283.721	77.8884	630.023	526.249	617.009
atg-9	WBGene00020706	1.92754	4.03e-08	2e-07	244.825	247.876	396.156	1249.6	1059.09	1057.73
atgl-1	WBGene00015484	1.7782	0.000128935	0.000377427	571.398	304.349	205.464	1450.33	1155.37	1110.07
atgp-1	WBGene00000224	2.87106	1.54e-20	3.07e-19	639.663	507.925	836.629	4863.82	4464.55	5161.94
atgp-2	WBGene00000225	2.48193	4.8e-17	6.65e-16	385.567	423.722	565.362	2363.46	2546.84	2751.75
ath-1	WBGene00010564	0.0015021	0.996683	0.998006	867.211	759.182	809.771	611.459	712.217	1121.08
athp-1	WBGene00008081	2.21951	2.06e-06	8.04e-06	60.2581	138.648	139.662	475.708	531.525	564.673
athp-2	WBGene00019217	1.77321	1.12e-07	5.24e-07	198.894	229.276	179.949	768.094	561.86	754.734
athp-3	WBGene00013799	1.47032	0.65084	0.71826	0	0	9.40032	0	19.7838	5.50901
atic-1	WBGene00016957	2.00213	1.33e-07	6.15e-07	514.09	592.805	688.909	1488.62	2871.29	2831.63
atl-1	WBGene00000226	0.146099	0.697393	0.758344	189.202	163.334	154.434	181.001	183.33	198.324
atln-1	WBGene00021868	1.23193	0.000899753	0.00224958	694.864	406.814	376.013	1192.75	1098.66	1184.44
atln-2	WBGene00012763	-3.90159	8.2e-23	2.03e-21	19479.8	8322.94	17777.4	950.255	1072.28	1027.43
atm-1	WBGene00000227	1.19627	0.00460021	0.00998823	125.573	86.9086	132.947	225.091	307.308	256.169
atn-1	WBGene00000228	-0.870312	0.0202578	0.0377837	1610.53	1914.69	1416.76	613.779	1220	870.423
atp-2	WBGene00000229	-1.10967	0.000933031	0.00232875	30160.6	32425.7	32080.6	15141.4	18931.8	9789.51
atp-3	WBGene00000230	-1.23053	4.97e-05	0.000155587	10740.7	10673.5	8937.02	4463.53	5224.24	3242.05
atp-4	WBGene00020275	-1.70887	5.8e-07	2.45e-06	7048.93	7353.75	8081.59	2651.2	2732.8	1487.43
atp-5	WBGene00007385	-0.897993	0.00699847	0.0145856	10221.1	11247.4	9491.64	4940.4	7521.8	4148.28
atp-6	WBGene00010960	-3.49441	1e-14	1.1e-13	66587.3	66084.4	38065.9	3280.06	7931.99	3936.19
attf-2	WBGene00017317	-0.939351	0.0467092	0.0791601	1458.84	2494.65	4160.31	1492.1	995.785	1743.6
attf-3	WBGene00018794	1.89392	9.3e-05	0.000278526	141.585	166.716	85.9458	540.682	303.352	630.781
attf-4	WBGene00015477	3.14548	7.37e-26	2.43e-24	209.428	208.31	159.805	1861.06	1478.51	1793.18
attf-5	WBGene00020214	1.89295	0.0617092	0.100733	14.3271	22.6571	155.777	85.8595	156.952	468.266
attf-6	WBGene00012474	-0.858583	0.0189041	0.035534	340.479	288.117	388.099	213.488	176.735	168.025
atx-2	WBGene00000231	-0.0194147	0.946816	0.959261	1371.19	1287.74	1175.04	1048.88	1230.55	1509.47
atx-3	WBGene00006446	-1.57083	0.0206524	0.0384178	68.2644	206.619	271.266	78.8979	51.4379	52.3356
avr-14	WBGene00000232	4.109	3.24e-24	9.04e-23	154.648	113.962	205.464	1850.62	2738.08	3553.31
avr-15	WBGene00000233	1.91659	5e-06	1.84e-05	339.636	200.194	334.383	725.164	1351.89	1220.25
axl-1	WBGene00010497	-1.31415	0.168604	0.234129	88.9123	34.1547	28.201	8.12184	23.7406	30.2995
B0001.2	WBGene00007087	-2.67554	2.03e-11	1.52e-10	369.976	525.848	420.329	59.1734	71.2217	77.1261
B0001.3	WBGene00007088	1.01221	0.0698336	0.112106	174.032	208.31	81.9171	464.105	226.854	247.905
B0001.4	WBGene00007089	-0.143984	0.707002	0.766534	492.178	325.992	550.59	345.758	406.227	487.547
B0001.5	WBGene00007090	1.77556	0.000149326	0.000432011	80.4846	143.382	141.005	544.163	294.119	407.667
B0001.7	WBGene00007092	-0.276767	0.680621	0.743884	117.145	86.9086	73.8597	85.8595	32.973	112.935
B0001.8	WBGene00007093	1.00149	0.0568648	0.0939084	137.372	99.0826	98.0319	272.662	121.341	278.205
B0019.2	WBGene00007094	0.582788	0.338986	0.422096	52.6731	119.711	193.378	164.757	166.184	214.851
B0024.10	WBGene00007100	-1.21322	0.017897	0.0338982	134	200.532	208.15	102.103	56.7136	74.3716
B0024.11	WBGene00007101	-0.246066	0.630272	0.700688	122.623	232.658	198.75	204.206	108.151	154.252
B0024.13	WBGene00007102	-0.644585	0.189741	0.259245	243.561	188.697	143.691	141.552	142.443	82.6351
B0024.15	WBGene00007104	4.7314	0.00202435	0.00473439	0	7.77781	0	53.3721	63.3082	104.671
B0024.3	WBGene00007096	2.58372	NA	NA	76.6921	8.79231	0	131.11	143.762	242.396
B0024.4	WBGene00007097	-3.31889	0.0109686	0.0218516	222.913	381.789	26.8581	6.96158	55.3947	0
B0025.4	WBGene00015001	0.91089	0.0304924	0.0543257	150.856	97.3918	111.461	232.053	242.681	201.079
B0025.5	WBGene00194700	-9.11085	2.56e-11	1.9e-10	165.183	129.518	198.75	0	0	0
B0034.1	WBGene00015002	-1.31665	0.0193898	0.0363014	251.146	156.233	143.691	44.09	83.092	96.4076
B0034.11	WBGene00197958	2.44881	0.548421	NA	0	0	0	0	0	2.7545
B0034.15	WBGene00200579	-1.60543	0.675625	0.739216	0	0	14.7719	4.64105	0	0
B0034.2	WBGene00015003	8.67186	5.2e-07	2.21e-06	0	0	0	49.8913	27.6973	52.3356
B0034.4	WBGene00015004	-2.36245	NA	NA	0	35.5074	1.3429	6.96158	0	0
B0034.5	WBGene00015005	2.53168	0.0349866	0.0613804	81.7487	24.6861	0	113.706	207.071	300.241
B0034.7	WBGene00044394	-2.01999	NA	NA	0	32.4639	0	0	7.91352	0
B0035.1	WBGene00007105	0.564149	0.114283	0.169848	430.234	415.944	330.354	547.644	460.303	738.207
B0035.12	WBGene00007111	0.455443	0.325277	0.407737	107.875	179.566	103.404	182.161	166.184	190.061
B0035.13	WBGene00007112	-3.00539	0.000153088	0.000442158	3156.6	3925.09	2609.26	630.023	540.757	33.054
B0035.15	WBGene00007113	-1.5007	0.00991284	0.0199893	186.674	315.847	369.298	51.0516	105.514	154.252
B0035.18	WBGene00044290	-5.54019	3.2e-06	1.21e-05	104.082	74.7347	136.976	5.80131	0	0
B0035.21	WBGene00235095	-5.90786	0.130822	0.189382	0	0	53.7161	0	0	0
B0035.3	WBGene00007106	-2.17335	0.000281272	0.0007757	208.586	232.996	141.005	22.045	51.4379	57.8446
B0035.6	WBGene00007109	-2.37333	0.00329845	0.00739335	51.409	193.431	216.207	47.5708	15.827	24.7905
B0041.1	WBGene00015006	-6.86539	0.0137136	0.0266916	0	20.9663	83.26	0	0	0
B0041.11	WBGene00206362	0.180165	0.689602	0.751663	154.227	169.759	114.147	167.078	129.254	203.833
B0041.5	WBGene00015009	0.236286	0.515333	0.597775	426.02	398.021	576.105	460.624	498.552	691.381
B0041.8	WBGene00015011	-2.14074	8.2e-05	0.000248033	268.844	145.411	318.268	55.6926	67.2649	41.3176
B0198.2	WBGene00007115	3.57904	5.86e-18	8.99e-17	70.7927	79.8071	44.3158	582.452	865.212	911.741
B0198.3	WBGene00007116	4.29155	8.33e-28	3.14e-26	43.4027	63.237	38.9442	1054.68	737.277	1093.54
B0205.1	WBGene00015017	0.672141	0.322829	0.40506	97.34	69.324	38.9442	75.4171	77.8163	179.043
B0205.10	WBGene00015024	-11.8566	1.16e-20	2.35e-19	907.242	851.163	1549.71	0	0	0
B0205.12	WBGene00044413	-2.92183	2.46e-06	9.47e-06	249.881	272.9	370.641	15.0834	44.8433	60.5991
B0205.13	WBGene00044644	-5.79987	2.4e-11	1.78e-10	1248.14	695.269	1145.5	46.4105	3.95676	2.7545
B0205.14	WBGene00044646	-6.02279	1.03e-07	4.83e-07	152.541	106.184	123.547	0	5.27568	0
B0205.4	WBGene00015019	-4.20334	0.00340163	0.00759792	38.7674	53.4302	95.3461	9.2821	0	0
B0205.5	WBGene00015020	-5.77317	0.0751325	0.11907	28.6542	0	20.1435	0	0	0
B0205.6	WBGene00015021	-0.469053	0.260081	0.337411	250.724	275.943	319.611	243.655	225.535	137.725
B0205.8	WBGene00015022	-1.42845	0.000572214	0.00148949	233.026	234.687	326.325	90.5005	94.9623	110.18
B0205.9	WBGene00015023	0.0938598	0.892341	0.917413	99.4469	117.682	143.691	71.9363	65.946	250.66
B0207.1	WBGene00015026	-7.6341	1.93e-05	6.46e-05	22.3334	124.783	29.5439	0	0	0
B0207.10	WBGene00015033	1.44289	0.266348	0.343972	61.5222	20.6281	0	78.8979	91.0055	55.0901
B0207.11	WBGene00015034	-7.85983	4.53e-06	1.68e-05	18.5409	66.9568	122.204	0	0	0
B0207.13	WBGene00195755	2.44881	0.548421	NA	0	0	0	1.16026	0	0
B0207.2	WBGene00015027	4.69873	0.0508701	0.085419	0	38.2127	0	171.719	348.195	479.284
B0207.5	WBGene00015028	-5.90644	0.0306499	0.0545782	0.421385	5.07249	48.3445	0	0	0
B0207.6	WBGene00015029	0.24105	0.782168	0.829923	12.2202	83.1888	61.7735	70.776	67.2649	46.8266
B0207.7	WBGene00015030	-1.63922	0.46023	0.545122	32.0253	37.5364	0	1.16026	0	22.036
B0207.9	WBGene00015032	-3.28274	0.00744119	0.0154083	32.868	83.1888	24.1723	8.12184	5.27568	0
B0212.3	WBGene00015037	0.685903	0.730919	0.787004	0	8.79231	18.8006	3.48079	2.63784	38.5631
B0218.5	WBGene00015049	-5.63849	NA	NA	0	44.2997	0	0	0	0
B0218.7	WBGene00015051	-8.55112	7.37e-11	5.16e-10	194.68	210.001	247.094	0	1.31892	0
B0222.1	WBGene00015053	5.00662	3.93e-07	1.71e-06	69.1072	24.3479	0	1304.14	841.471	897.968
B0222.10	WBGene00015058	4.64816	0.240961	NA	0	0	0	0	0	8.26351
B0222.11	WBGene00044582	-0.0539095	0.961227	0.970968	63.2078	19.9518	36.2584	48.731	3.95676	63.3536
B0222.14	WBGene00201384	3.10809	0.442051	NA	0	0	0	2.32053	0	0
B0222.15	WBGene00235316	2.48001	0.0583051	0.0958615	28.2328	5.41065	0	69.6158	42.2055	79.8806
B0222.5	WBGene00015056	-2.78836	0.00029164	0.000801999	1156.7	611.742	559.991	41.7695	40.8865	258.923
B0228.1	WBGene00015059	0.0842014	0.905384	0.927962	58.1511	95.3628	91.3174	119.507	106.833	30.2995
B0228.6	WBGene00015063	4.70981	4.04e-16	5.12e-15	22.7548	61.208	119.518	1858.74	1504.89	1886.84
B0228.7	WBGene00015064	-0.924503	0.000880549	0.00220665	1225.39	1225.85	1115.95	722.844	576.368	578.446
B0228.8	WBGene00015065	2.3359	0.46233	0.547161	0	4.39616	0	9.2821	0	13.7725
B0228.9	WBGene00015066	7.1007	0.0698906	0.112168	0	0	0	0	43.5244	0
B0238.1	WBGene00015067	-0.347424	0.564437	0.641856	105.768	112.609	94.0032	96.3018	108.151	38.5631
B0238.10	WBGene00015074	0.821822	0.0342005	0.060117	707.506	524.495	527.761	1458.45	837.514	812.579
B0238.11	WBGene00015075	1.19509	0.0613785	0.100221	100.29	262.417	64.4593	342.278	225.535	415.93
B0238.12	WBGene00015076	1.26384	0.0502494	0.0845075	77.9562	61.5462	34.9155	98.6223	100.238	225.869
B0238.15	WBGene00044537	21.5617	1.69e-09	9.98e-09	0	0	0	0	84.4109	0
B0238.7	WBGene00015071	-0.713559	0.855145	NA	0	4.39616	0	2.32053	0	0
B0238.9	WBGene00015073	-5.07195	6.42e-15	7.2e-14	361.97	343.915	465.987	3.48079	18.4649	13.7725
B0244.10	WBGene00015085	-2.40889	0.0629511	0.102442	34.975	42.9471	61.7735	0	13.1892	13.7725
B0244.11	WBGene00015086	4.8757	0.00691957	0.0144371	0	5.41065	0	25.5258	7.91352	137.725
B0244.14	WBGene00200415	-3.14172	0.424066	NA	0	0	8.05742	0	0	0
B0244.15	WBGene00206513	4.65796	0.239926	NA	0	0	0	0	7.91352	0
B0244.17	WBGene00271715	2.36678	0.412604	0.497858	0	6.42515	0	23.2053	10.5514	0
B0244.4	WBGene00015079	-0.132692	0.972107	0.979399	0	10.145	0	0	9.23244	0
B0244.5	WBGene00015080	0.0769234	0.971174	0.978793	0	0.338166	36.2584	5.80131	18.4649	13.7725
B0244.6	WBGene00015081	-0.370777	0.825105	0.865091	0	21.9808	52.3732	22.045	23.7406	11.018
B0244.9	WBGene00015084	-8.2901	8.32e-08	3.97e-07	145.799	88.2613	44.3158	0	0	0
B0244.t2	WBGene00022898	4.87766	0.217551	NA	0	0	0	0	9.23244	0
B0250.12	WBGene00050927	3.34954	0.00347545	0.00774884	65.3147	12.8503	0	314.431	188.606	302.995
B0250.18	WBGene00206505	8.4388	2.87e-05	9.32e-05	0	0	0	58.0131	46.1622	5.50901
B0250.3	WBGene00007120	-5.72387	0.000144506	0.000419327	61.9436	71.353	26.8581	0	2.63784	0
B0250.4	WBGene00007121	5.67573	3.58e-07	1.56e-06	0	11.1595	2.68581	256.418	146.4	330.54
B0250.5	WBGene00007122	-1.5462	2.42e-05	7.97e-05	1183.67	1438.56	1313.36	429.297	602.747	311.259
B0250.7	WBGene00007124	-2.88916	0.22173	0.295504	47.1951	50.0485	0	12.7629	0	0
B0250.8	WBGene00007125	2.65173	0.466127	NA	0	2.029	0	0	5.27568	8.26351
B0252.1	WBGene00015087	2.83549	0.288347	0.367296	0	7.10148	0	35.9681	15.827	0
B0252.3	WBGene00015088	-1.77327	0.00494915	0.0106618	290.756	265.798	171.892	69.6158	113.427	27.545
B0252.5	WBGene00015089	-2.69985	8.78e-05	0.000264159	130.629	176.523	299.467	52.2118	22.4216	16.527
B0252.8	WBGene00044615	0.424764	0.236037	0.311389	571.398	436.572	417.643	798.261	614.617	498.565
B0261.1	WBGene00015091	1.71957	8.59e-07	3.56e-06	214.064	233.673	291.41	765.773	660.779	1005.39
B0261.5	WBGene00015093	-7.50742	0.0034822	0.00776289	0	45.6524	116.833	0	0	0
B0261.6	WBGene00015094	-6.5449	1.69e-12	1.45e-11	286.12	294.204	318.268	8.12184	0	0
B0261.7	WBGene00015095	-4.47512	1.33e-18	2.16e-17	281.485	311.451	318.268	12.7629	14.5081	13.7725
B0261.8	WBGene00015096	-1.25048	0.165853	0.230585	29.497	192.416	249.78	117.187	32.973	46.8266
B0272.3	WBGene00007129	-1.52858	0.000134003	0.000391533	1037.03	806.526	906.46	250.617	457.665	242.396
B0272.4	WBGene00007130	0.0327002	0.966772	0.975092	50.5662	60.1935	213.522	55.6926	142.443	132.216
B0273.1	WBGene00015097	-5.17328	0.000174306	0.000498872	97.7613	37.5364	59.0877	4.64105	0	0
B0280.11	WBGene00015106	-3.64586	0.00206209	0.00481552	92.2833	159.276	98.0319	0	5.27568	24.7905
B0280.13	WBGene00015107	-0.32291	0.696342	0.757606	152.541	108.213	52.3732	105.584	123.979	19.2815
B0280.17	WBGene00044674	-10.3133	8.7e-15	9.61e-14	257.045	312.127	566.705	0	0	0
B0280.2	WBGene00015100	6.41562	0.0895188	0.138317	0	0	0	0	2.63784	24.7905
B0280.6	WBGene00023224	2.44881	0.548421	NA	0	0	0	0	1.31892	0
B0280.7	WBGene00015103	-8.76007	3.12e-10	2.02e-09	125.151	113.962	147.719	0	0	0
B0280.9	WBGene00015104	-0.673682	0.305341	0.385881	302.133	140.001	71.1739	112.545	116.065	93.6531
B0281.3	WBGene00015110	0.0144207	0.991893	0.9943	75.0065	29.4204	0	26.686	35.6109	44.0721
B0281.5	WBGene00015112	2.84191	0.126267	0.184093	18.9623	0	0	45.2503	46.1622	46.8266
B0281.6	WBGene00015113	5.76288	3.72e-05	0.000118678	0	5.07249	0	110.225	151.676	44.0721
B0284.1	WBGene00007131	-0.994915	0.751167	0.803915	0	0	32.2297	0	10.5514	5.50901
B0284.2	WBGene00007132	4.03858	0.311864	NA	0	0	0	0	0	5.50901
B0284.3	WBGene00007133	1.00431	0.103941	0.156715	34.1322	36.8601	71.1739	81.2184	112.108	88.1441
B0284.5	WBGene00045188	0.946739	0.805735	NA	0	3.38166	0	0	6.5946	0
B0284.6	WBGene00045189	-2.80764	0.18008	0.247842	0	9.13048	126.233	6.96158	11.8703	0
B0285.11	WBGene00014641	-4.98212	NA	NA	0	28.0678	0	0	0	0
B0285.3	WBGene00007136	-0.621766	0.485746	0.569627	24.0189	64.5897	143.691	77.7376	46.1622	24.7905
B0285.4	WBGene00007137	-1.43763	0.000244992	0.000682483	300.869	283.721	229.636	97.4621	106.833	96.4076
B0285.6	WBGene00007138	-2.12619	0.0872906	0.135418	107.032	62.2225	37.6013	8.12184	38.2487	0
B0286.1	WBGene00015115	1.77034	0.000198655	0.00056317	117.988	164.687	306.182	667.151	552.628	779.525
B0286.3	WBGene00015116	-2.05658	1.11e-11	8.68e-11	904.714	1005.03	878.259	232.053	245.319	190.061
B0294.1	WBGene00015117	2.51499	2.5e-09	1.45e-08	223.755	103.141	145.034	1057	823.006	818.088
B0294.3	WBGene00015118	3.67989	0.359553	NA	0	0	0	0	3.95676	0
B0302.2	WBGene00015119	6.78646	0.00884213	0.0180188	0	0	0	8.12184	5.27568	22.036
B0302.4	WBGene00015121	5.81986	0.138881	0.19848	0	0	0	4.64105	13.1892	0
B0302.5	WBGene00015122	-1.8539	4.21e-07	1.82e-06	498.077	485.268	499.56	104.424	163.546	143.234
B0303.11	WBGene00015131	-1.01962	0.0647398	0.105017	456.781	275.605	243.065	106.744	117.384	261.678
B0303.14	WBGene00015132	-1.19644	0.12667	0.184557	69.5285	37.5364	165.177	38.2887	46.1622	33.054
B0303.16	WBGene00044678	4.03655	0.0304516	0.0542753	0	5.74882	0	24.3655	10.5514	66.1081
B0303.3	WBGene00015125	-1.94749	1.22e-06	4.94e-06	1733.58	1343.53	1141.47	232.053	461.622	402.158
B0303.4	WBGene00015126	0.591883	0.149487	0.210566	397.788	263.093	315.582	397.97	400.952	677.608
B0303.7	WBGene00015128	1.50754	6.48e-08	3.13e-07	386.41	332.755	396.156	989.704	1152.74	1024.68
B0304.2	WBGene00015134	-5.83867	3.06e-06	1.16e-05	58.9939	100.773	225.608	5.80131	0	0
B0304.4	WBGene00015136	-2.04807	0.465171	0.54996	3.37108	40.9181	0	0	10.5514	0
B0310.1	WBGene00015137	-1.17095	0.0831888	0.129984	302.976	195.122	94.0032	56.8529	142.443	63.3536
B0310.2	WBGene00015138	-6.36097	1.01e-05	3.57e-05	140.321	42.9471	56.4019	2.32053	0	0
B0310.3	WBGene00015139	0.153373	0.845793	0.88073	64.8933	29.0823	122.204	103.263	39.5676	96.4076
B0310.6	WBGene00015142	-8.14719	8.06e-07	3.35e-06	166.868	34.4929	51.0303	0	0	0
B0310.9	WBGene00200462	-2.53706	0.519848	NA	0	5.07249	0	0	0	0
B0334.10	WBGene00007148	-6.49949	0.0296453	0.0529907	0	7.10148	73.8597	0	0	0
B0334.13	WBGene00007149	-10.4115	4.1e-15	4.7e-14	331.63	275.943	608.335	0	0	0
B0334.3	WBGene00007143	-0.558896	0.0262044	0.0474365	1560.39	1622.18	1530.91	1118.49	1125.04	953.058
B0334.4	WBGene00007144	-0.32254	0.578115	0.654194	113.353	266.475	295.439	140.392	265.103	132.216
B0334.5	WBGene00007145	-1.07667	0.0968953	0.147728	399.052	131.547	119.518	107.904	120.022	79.8806
B0334.6	WBGene00007146	-4.73727	0.000559646	0.00145831	45.0882	82.5125	63.1164	0	6.5946	0
B0334.9	WBGene00007147	6.09498	0.120739	0.177301	0	0	0	0	0	22.036
B0336.12	WBGene00015149	-0.0548311	0.988627	NA	0.421385	5.07249	0	0	5.27568	0
B0336.13	WBGene00015150	0.183921	0.715553	0.773339	105.768	71.6912	110.118	96.3018	96.2812	134.971
B0336.3	WBGene00015143	0.640318	0.0977942	0.14898	875.638	613.771	541.19	871.357	879.72	1421.32
B0336.5	WBGene00015145	-0.931911	0.211816	0.284455	177.403	99.4208	37.6013	59.1734	43.5244	63.3536
B0336.7	WBGene00015147	-1.48258	0.0147524	0.0285036	219.963	106.86	247.094	97.4621	43.5244	63.3536
B0344.1	WBGene00023226	4.22725	0.288543	NA	0	0	0	5.80131	0	0
B0348.1	WBGene00015151	5.24671	0.183507	NA	0	0	0	9.2821	2.63784	0
B0348.10	WBGene00255704	0.655763	0.844795	0.879922	0	9.13048	0	10.4424	3.95676	0
B0348.2	WBGene00015152	2.84988	0.0330484	0.0583282	0	20.29	72.5168	125.308	179.373	358.086
B0348.5	WBGene00015153	-6.64941	2.84e-05	9.25e-05	79.6418	27.7296	67.1452	0	1.31892	0
B0348.9	WBGene00235314	6.35591	0.0880802	0.136465	0	0	0	3.48079	22.4216	0
B0350.80	WBGene00201487	4.03858	0.311864	NA	0	0	0	0	0	5.50901
B0350.84	WBGene00202317	-1.46535	0.712706	NA	0	2.36716	0	0	0	0
B0353.1	WBGene00015155	-0.658776	0.0485789	0.0820163	431.92	453.819	514.332	290.066	249.276	349.822
B0361.11	WBGene00015165	-6.65403	0.00036408	0.000984042	33.2894	22.9953	33.5726	0	0	0
B0361.2	WBGene00015156	-0.34536	0.36482	0.4492	566.763	525.51	972.262	526.759	549.99	545.392
B0361.3	WBGene00015157	-0.975198	0.0432341	0.0739572	210.693	132.561	136.976	75.4171	81.7731	88.1441
B0361.4	WBGene00015158	3.79937	4.17e-16	5.27e-15	59.4153	68.6477	143.691	994.345	1179.11	1564.56
B0361.6	WBGene00015160	-1.68472	0.00958355	0.0193952	104.082	216.426	457.93	83.5389	85.7298	71.6171
B0361.8	WBGene00015162	1.01939	0.0110389	0.0219789	526.31	388.891	337.069	583.612	854.66	1107.31
B0361.9	WBGene00015163	-1.9869	0.00125982	0.00307015	165.183	155.556	393.471	48.731	83.092	46.8266
B0365.10	WBGene00219786	5.40534	0.170185	NA	0	0	0	0	0	13.7725
B0365.2	WBGene00007151	-2.53706	0.519848	NA	0	5.07249	0	0	0	0
B0365.9	WBGene00219208	-4.56415	2.93e-14	3.06e-13	289.913	196.474	333.04	11.6026	7.91352	16.527
B0379.1	WBGene00007155	-0.669422	0.263789	0.341251	490.914	309.422	439.129	230.892	445.795	99.1621
B0379.2	WBGene00007156	-9.71963	1.37e-13	1.33e-12	236.397	219.131	296.782	0	0	0
B0379.7	WBGene00007159	-9.48299	9.77e-14	9.68e-13	358.599	395.992	488.817	0	1.31892	0
B0391.10	WBGene00007165	-3.70605	0.000827812	0.00208807	67.843	133.237	175.92	0	15.827	13.7725
B0391.14	WBGene00206462	-1.38617	0.604372	0.678154	64.8933	5.41065	0	0	0	27.545
B0391.8	WBGene00014643	-2.59957	0.123026	0.180111	1.26416	26.3769	100.718	15.0834	5.27568	0
B0393.3	WBGene00007168	-3.42938	2.5e-05	8.2e-05	145.378	197.489	75.2026	22.045	5.27568	11.018
B0393.4	WBGene00007169	-8.62963	1.1e-09	6.67e-09	107.453	99.7589	146.376	0	0	0
B0393.5	WBGene00007170	-1.95284	0.00958419	0.0193952	344.693	149.131	291.41	69.6158	17.146	118.444
B0393.6	WBGene00007171	-3.63121	0.00188801	0.00444189	116.724	58.1645	24.1723	5.80131	9.23244	0
B0393.7	WBGene00007172	4.77161	0.00127363	0.00309947	0	15.8938	0	117.187	204.433	129.462
B0393.9	WBGene00044636	-0.996128	0.124381	0.181817	82.5915	213.383	103.404	91.6608	60.6703	46.8266
B0395.3	WBGene00007175	0.82427	0.0507636	0.0852813	648.933	355.412	680.852	1072.08	699.028	1211.98
B0395.8	WBGene00199788	-0.479924	0.904891	NA	0	1.0145	0	0	0	0
B0403.3	WBGene00015167	-2.78339	0.00378597	0.00837764	302.976	147.44	24.1723	35.9681	18.4649	13.7725
B0403.5	WBGene00015169	-6.65443	5.31e-27	1.91e-25	722.675	552.563	876.916	8.12184	10.5514	0
B0403.6	WBGene00043982	-1.74729	0.403666	0.489012	26.5473	37.1982	0	5.80131	0	13.7725
B0410.3	WBGene00015172	-3.67256	9.51e-13	8.38e-12	2010.43	1125.75	1603.43	69.6158	207.071	93.6531
B0416.10	WBGene00206482	2.16871	0.516374	0.598622	0	4.05799	0	0	5.27568	13.7725
B0416.11	WBGene00206483	-5.30859	0.128672	0.186924	0	17.9228	17.4577	0	0	0
B0416.2	WBGene00015178	-0.693233	0.853828	0.887179	25.7045	0	0	0	15.827	0
B0416.3	WBGene00015179	3.33087	0.00213587	0.00496775	22.7548	11.8358	0	170.559	101.557	85.3896
B0416.4	WBGene00015180	4.70282	0.235227	NA	0	0	0	8.12184	0	0
B0416.5	WBGene00015181	1.51352	2.77e-07	1.23e-06	925.362	763.24	977.633	2730.1	2048.28	2831.63
B0416.7	WBGene00015182	-1.01972	0.108369	0.162422	83.0129	56.1355	85.9458	35.9681	46.1622	27.545
B0432.1	WBGene00015183	2.02677	0.213145	0.285974	0	9.46864	29.5439	8.12184	104.195	44.0721
B0432.10	WBGene00015191	-1.77729	0.174342	0.241074	73.321	72.7057	12.0861	26.686	18.4649	0
B0432.11	WBGene00015192	-8.3215	4.29e-07	1.85e-06	24.4403	89.6139	171.892	0	0	0
B0432.13	WBGene00015194	0.244133	0.899593	0.923173	34.5536	35.1692	0	13.9232	68.5839	0
B0432.14	WBGene00044640	4.40117	2.11e-13	2.01e-12	413.379	270.195	291.41	13447.4	2620.69	4536.67
B0432.7	WBGene00015188	-0.206619	0.801312	0.845735	67.843	27.0533	89.9745	88.18	29.0162	41.3176
B0432.8	WBGene00015189	-2.0179	0.0608268	0.0994607	97.34	24.0098	61.7735	16.2437	2.63784	27.545
B0432.9	WBGene00015190	-3.22109	0.220345	0.293952	0	27.3914	36.2584	0	6.5946	0
B0454.18	WBGene00199082	0.434766	0.91482	NA	0.421385	0	0	0	0	0
B0454.26	WBGene00206372	-6.97025	7.99e-05	0.000241885	26.9686	41.9326	42.9729	0	0	0
B0454.5	WBGene00015196	-4.64065	3.2e-07	1.41e-06	264.63	139.662	94.0032	11.6026	6.5946	0
B0454.6	WBGene00015197	-4.54579	1.73e-38	1.42e-36	1236.77	1004.69	1277.1	46.4105	56.7136	46.8266
B0454.8	WBGene00015199	-4.38233	0.00215063	0.00499605	136.529	30.0968	119.518	12.7629	0	0
B0454.9	WBGene00015200	2.81025	0.00589618	0.0125077	50.5662	109.566	1.3429	444.381	478.768	217.606
B0457.2	WBGene00007178	-1.71099	0.00927382	0.0188335	288.227	231.644	299.467	25.5258	129.254	96.4076
B0457.3	WBGene00014660	-5.53863	0.156754	0.219501	0	0	41.63	0	0	0
B0457.4	WBGene00007179	1.9506	0.389464	0.474558	0	10.145	0	9.2821	9.23244	22.036
B0457.6	WBGene00007180	1.41589	3.87e-05	0.000123222	233.447	238.407	323.64	791.299	579.006	746.471
B0462.1	WBGene00007181	2.15644	0.485343	0.56927	0	6.42515	0	0	23.7406	5.50901
B0462.4	WBGene00007183	-5.41945	0.117852	0.174108	0	7.43965	30.8868	0	0	0
B0462.5	WBGene00194695	0.274555	0.942165	0.956031	0	9.80681	0	0	11.8703	0
B0464.6	WBGene00007186	-0.932685	0.0745259	0.11828	362.813	201.885	167.863	97.4621	121.341	168.025
B0464.9	WBGene00007188	-0.133577	0.802563	0.846643	89.755	119.034	178.606	93.9813	105.514	154.252
B0478.3	WBGene00015202	0.431326	0.843002	0.878509	0	11.1595	20.1435	15.0834	26.3784	0
B0491.1	WBGene00007189	-0.00152663	0.998076	0.998824	194.259	90.6284	243.065	269.181	91.0055	165.27
B0491.5	WBGene00007192	-0.913214	0.000600393	0.00155723	3710.3	3397.55	2845.61	1943.44	1726.47	1614.14
B0491.6	WBGene00007193	0.902918	0.00913	0.0185683	176.139	193.431	212.179	339.957	419.417	325.031
B0491.7	WBGene00007194	-0.995001	0.0562379	0.0929829	230.076	130.194	161.148	107.904	91.0055	60.5991
B0491.t2	WBGene00008179	5.07579	0.198734	NA	0	0	0	0	0	11.018
B0495.12	WBGene00195973	6.4208	0.101755	0.153838	0	0	0	0	0	27.545
B0495.18	WBGene00198226	-4.38478	0.262926	0.340389	18.5409	0	0	0	0	0
B0495.2	WBGene00015203	-1.55233	0.00185576	0.00437373	319.831	342.224	766.798	140.392	170.141	176.288
B0495.21	WBGene00200617	-1.03352	0.796042	NA	0	1.69083	0	0	0	0
B0495.5	WBGene00015204	0.897051	0.0783061	0.123255	133.158	68.3095	88.6316	181.001	217.622	140.48
B0495.7	WBGene00015206	-1.19584	0.000327508	0.000892428	1833.45	1265.75	1367.08	663.67	520.974	768.507
B0495.8	WBGene00015207	0.338886	0.273215	0.35167	310.982	314.494	355.869	430.458	435.244	371.858
B0495.9	WBGene00015208	-0.43442	0.284153	0.362619	479.958	277.296	298.124	247.136	288.844	245.151
B0496.1	WBGene00015210	-0.610101	0.873634	NA	0	8.11598	0	0	5.27568	0
B0496.11	WBGene00194883	2.54081	0.0948521	0.145123	2.52831	8.11598	0	12.7629	17.146	35.8086
B0496.2	WBGene00015211	-4.02776	0.304129	NA	4.63524	9.80681	0	0	0	0
B0496.6	WBGene00015215	2.85402	0.19039	0.26001	0.84277	12.174	0	11.6026	0	85.3896
B0507.1	WBGene00015218	0.00971724	0.98923	0.991803	93.1261	141.015	76.5455	58.0131	58.0325	201.079
B0507.10	WBGene00015227	-0.86156	0.628333	0.69916	0	27.0533	29.5439	6.96158	7.91352	16.527
B0507.15	WBGene00202499	7.00299	0.0040214	0.00885117	0	0	0	15.0834	6.5946	19.2815
B0507.17	WBGene00235307	-4.57821	0.2423	0.318198	0	0	21.4864	0	0	0
B0507.2	WBGene00015219	1.78087	0.000412403	0.00110467	199.737	276.281	102.061	693.837	455.028	848.387
B0507.3	WBGene00015220	1.56813	0.00373507	0.00827768	53.9373	35.8456	83.26	163.597	185.968	157.007
B0507.4	WBGene00015221	6.41945	0.0803891	0.126167	0	0	0	8.12184	0	19.2815
B0507.5	WBGene00015222	4.87766	0.217551	NA	0	0	0	0	9.23244	0
B0507.6	WBGene00015223	-5.47286	0.100051	0.151739	32.0253	7.43965	0	0	0	0
B0507.8	WBGene00015225	2.01194	0.541828	0.621896	0.84277	4.39616	0	0	0	22.036
B0507.9	WBGene00015226	4.03858	0.311864	NA	0	0	0	0	0	5.50901
B0511.11	WBGene00015236	-4.44142	0.00284986	0.00647385	160.126	169.083	49.6874	0	0	19.2815
B0511.12	WBGene00015237	1.83548	0.000134321	0.000392332	198.472	310.774	535.818	918.928	1177.8	1625.16
B0511.13	WBGene00015238	1.82842	0.000310691	0.000851821	33.2894	38.8891	40.2871	106.744	149.038	143.234
B0511.19	WBGene00255714	-7.64883	4.58e-06	1.7e-05	92.7047	58.8409	26.8581	0	0	0
B0511.2	WBGene00015228	-0.770979	0.630092	0.700533	34.5536	21.9808	12.0861	5.80131	0	35.8086
B0511.6	WBGene00015232	1.38171	7.81e-05	0.000236729	801.896	1104.45	1093.12	3484.27	2180.18	2145.76
B0511.7	WBGene00015233	-0.0698638	0.908205	0.929974	132.736	185.653	59.0877	122.988	96.2812	143.234
B0513.12	WBGene00045279	-0.0590556	0.988324	NA	0	0.676332	0	0	0	0
B0513.2	WBGene00007195	-3.64176	3.92e-09	2.21e-08	246.089	397.345	498.217	16.2437	23.7406	55.0901
B0513.4	WBGene00007196	-2.5278	8.77e-05	0.000263823	610.166	561.693	577.448	140.392	137.168	22.036
B0513.5	WBGene00007197	2.86029	1.12e-20	2.27e-19	289.913	218.793	193.378	1750.84	1603.81	1760.13
B0513.7	WBGene00007199	4.01227	0.302682	NA	0	0	1.3429	5.80131	5.27568	0
B0524.2	WBGene00015241	-4.93509	0.0771027	0.121714	0	25.0243	28.201	0	0	2.7545
B0524.3	WBGene00015242	-2.87244	0.465394	NA	0	6.42515	0	0	0	0
B0524.4	WBGene00015243	-1.0671	0.7785	0.826385	0	17.2465	0	8.12184	0	0
B0524.5	WBGene00015244	-8.98421	5.71e-10	3.58e-09	71.2141	168.745	212.179	0	0	0
B0524.6	WBGene00015245	-0.625379	0.419062	0.504527	94.3903	91.9811	123.547	66.135	18.4649	118.444
B0545.4	WBGene00015247	-3.93012	0.0037198	0.0082512	181.196	81.8361	25.5152	0	15.827	2.7545
B0546.3	WBGene00015250	2.66597	6.41e-19	1.08e-17	266.315	240.774	193.378	1669.62	1390.14	1399.29
B0546.4	WBGene00015251	2.86385	1.15e-16	1.53e-15	262.944	255.315	417.643	2637.28	2094.45	2052.11
B0546.5	WBGene00015252	-1.00745	0.796225	NA	0	5.41065	0	2.32053	0	0
B0554.4	WBGene00015257	-2.43939	0.536295	NA	0	4.73432	0	0	0	0
B0554.5	WBGene00015258	-2.18831	0.123233	0.180337	56.0442	24.3479	47.0016	4.64105	0	24.7905
B0554.7	WBGene00015260	2.20221	0.187332	0.256479	0	2.70533	21.4864	19.7245	19.7838	68.8626
B0563.1	WBGene00015261	5.71975	0.0796215	0.125109	0	0	0	4.64105	3.95676	8.26351
B0563.18	WBGene00206365	8.806	1.93e-06	7.56e-06	0	0	0	83.5389	11.8703	46.8266
B0563.5	WBGene00015262	-3.28527	0.000328594	0.000895104	83.8556	45.6524	65.8022	5.80131	10.5514	2.7545
B0563.6	WBGene00015263	3.9802	2.05e-16	2.67e-15	117.566	38.8891	100.718	1377.23	1187.03	1476.41
B0563.7	WBGene00015264	0.855004	0.122111	0.179013	58.1511	75.0728	115.49	154.315	188.606	101.917
B0564.2	WBGene00007202	-1.4844	0.0168039	0.0320553	74.1638	128.503	123.547	46.4105	43.5244	24.7905
B0564.7	WBGene00007207	-0.240239	0.64965	0.717175	230.919	151.836	111.461	97.4621	174.097	148.743
baf-1	WBGene00000235	-3.22749	7.95e-14	7.95e-13	1421.75	1126.43	776.198	161.277	102.876	88.1441
bag-1	WBGene00000236	-0.080885	0.892966	0.917834	449.618	334.784	229.636	156.635	232.13	575.691
bah-1	WBGene00050875	-9.16424	3.54e-10	2.28e-09	302.976	101.788	106.089	0	0	0
bam-2	WBGene00000237	3.34406	1.81e-21	4.01e-20	276.007	191.064	153.091	2269.47	2225.02	1826.24
bar-1	WBGene00000238	1.21568	0.00359489	0.00799767	337.529	234.349	247.094	866.716	437.882	597.727
bas-1	WBGene00000239	1.38437	0.000286518	0.000789288	307.611	272.9	339.754	590.574	1094.7	713.417
basl-1	WBGene00015467	-7.71111	1.31e-06	5.28e-06	208.586	128.841	25.5152	0	0	2.7545
basl-2	WBGene00017392	-6.10946	0.00380313	0.00841131	18.5409	29.4204	13.429	0	0	0
bath-1	WBGene00019139	-0.00750011	0.997829	0.99875	0	19.9518	17.4577	0	36.9298	0
bath-10	WBGene00021726	8.07882	2.05e-05	6.82e-05	0	0	0	26.686	26.3784	33.054
bath-11	WBGene00018664	-2.78979	0.313994	0.395319	0	17.5846	29.5439	0	6.5946	0
bath-12	WBGene00019131	-1.09307	0.774157	0.822853	0	14.203	0	0	6.5946	0
bath-13	WBGene00018223	6.07606	0.117632	0.173859	0	0	0	8.12184	13.1892	0
bath-14	WBGene00015016	-2.09894	0.595558	NA	0	3.71982	0	0	0	0
bath-15	WBGene00015590	0.657012	0.660586	0.726059	41.2957	41.9326	0	83.5389	39.5676	8.26351
bath-18	WBGene00018224	-3.61555	0.356806	NA	0	10.8213	0	0	0	0
bath-19	WBGene00019132	-4.49192	0.251356	0.327931	0	19.9518	0	0	0	0
bath-2	WBGene00018668	-6.73279	0.000277132	0.0007655	26.5473	42.6089	25.5152	0	0	0
bath-20	WBGene00015012	6.52619	0.0635867	0.10335	0	0	0	18.5642	10.5514	0
bath-21	WBGene00019138	-3.82317	0.329589	NA	0	12.5121	0	0	0	0
bath-22	WBGene00018658	-2.27622	0.436726	0.521774	32.4467	2.36716	0	6.96158	0	0
bath-24	WBGene00015014	0.414442	0.912413	0.932942	0	12.8503	0	0	17.146	0
bath-25	WBGene00020859	-5.32766	0.116743	0.172822	26.5473	9.13048	0	0	0	0
bath-26	WBGene00020329	2.69518	0.0798566	0.125456	0	13.5266	28.201	112.545	145.081	8.26351
bath-27	WBGene00017450	-6.10185	0.045595	0.0774458	0	29.0823	32.2297	0	0	0
bath-28	WBGene00017461	-4.11009	NA	NA	0	47.3432	0	2.32053	0	0
bath-29	WBGene00017452	-7.05784	5.63e-05	0.000174339	28.6542	53.7684	36.2584	0	0	0
bath-3	WBGene00019140	-0.273655	NA	NA	0	33.8166	1.3429	0	29.0162	0
bath-30	WBGene00017460	-3.07546	0.0681458	0.109691	80.0632	109.566	14.7719	0	23.7406	0
bath-31	WBGene00017405	4.64816	0.240961	NA	0	0	0	0	0	8.26351
bath-34	WBGene00012195	-3.47491	0.376027	NA	0	9.80681	0	0	0	0
bath-35	WBGene00012196	0.532758	0.888644	NA	0	6.42515	0	9.2821	0	0
bath-36	WBGene00013569	1.45313	0.347761	0.43111	0	12.174	30.8868	22.045	44.8433	49.5811
bath-37	WBGene00010669	3.84712	8.78e-05	0.000264159	15.1699	24.3479	0	151.994	242.681	192.815
bath-38	WBGene00009945	0.964449	0.0172858	0.032877	166.868	187.344	146.376	382.887	233.449	363.595
bath-39	WBGene00009137	2.00195	0.0180159	0.034103	12.6416	36.1837	40.2871	81.2184	50.119	225.869
bath-4	WBGene00018665	-2.80293	0.0233141	0.0427984	34.5536	19.9518	73.8597	9.2821	7.91352	0
bath-40	WBGene00013689	1.00854	0.0189111	0.0355433	543.587	491.017	239.037	940.973	705.622	922.759
bath-41	WBGene00018137	-1.28801	0.0439797	0.0750254	81.3273	176.184	112.804	34.8079	72.5406	44.0721
bath-42	WBGene00016803	0.596018	0.121848	0.178674	491.756	430.485	345.126	466.426	610.66	845.633
bath-43	WBGene00011815	1.74232	1.03e-10	7.09e-10	454.675	366.91	401.528	1359.83	1304.41	1429.59
bath-44	WBGene00015567	2.08286	2.65e-07	1.18e-06	536.002	384.833	329.011	1348.23	1452.13	2506.6
bath-45	WBGene00009247	2.95831	0.226766	0.301082	0	3.04349	0	10.4424	3.95676	11.018
bath-46	WBGene00020325	-0.657018	0.336497	0.41963	56.0442	51.4012	92.6603	40.6092	56.7136	27.545
bath-47	WBGene00006464	4.16861	0.000146387	0.000424075	0.421385	30.0968	21.4864	389.848	439.2	101.917
bath-5	WBGene00019141	-2.95279	0.0124665	0.0245008	182.038	64.9278	33.5726	24.3655	10.5514	0
bath-6	WBGene00018666	-3.26313	0.406159	NA	0	8.45415	0	0	0	0
bath-7	WBGene00018667	0.198046	0.957998	0.968471	0	17.2465	0	0	19.7838	0
bath-9	WBGene00021725	7.09457	9.11e-08	4.32e-07	0	1.35266	0	41.7695	84.4109	112.935
bbs-1	WBGene00000241	5.76219	0.0137356	0.0267313	30.7611	0	0	504.714	498.552	677.608
bbs-2	WBGene00000242	4.58071	2.16e-05	7.16e-05	24.8617	4.39616	0	125.308	242.681	355.331
bbs-4	WBGene00043992	3.82822	0.000834443	0.00210144	29.497	4.39616	0	117.187	172.779	203.833
bbs-5	WBGene00010974	4.37138	5.83e-12	4.69e-11	67.4216	12.5121	28.201	647.427	697.709	903.477
bbs-8	WBGene00000244	4.34754	7.4e-11	5.18e-10	48.0379	9.13048	45.6587	560.407	520.974	991.621
bbs-9	WBGene00016744	2.40987	0.00434691	0.00949891	25.2831	6.08699	34.9155	61.4939	147.719	137.725
bca-1	WBGene00000245	-0.883787	0.0875276	0.135735	279.378	419.326	251.123	102.103	158.27	258.923
bca-2	WBGene00013805	-0.0870895	0.841349	0.877313	252.41	467.345	452.558	411.893	420.736	267.187
bcat-1	WBGene00001149	0.444749	0.0911165	0.140311	2496.71	2016.82	2152.67	3426.26	2761.82	2883.97
bcc-1	WBGene00000246	-0.30309	0.696283	0.757606	43.4027	64.5897	22.8294	29.0066	42.2055	35.8086
bcl-1	WBGene00016192	0.23113	0.603334	0.677189	87.6481	113.962	114.147	128.789	114.746	126.707
bcmo-1	WBGene00012914	6.09498	0.120739	0.177301	0	0	0	0	0	22.036
bcmo-2	WBGene00018755	1.54819	0.211611	0.284264	89.3336	55.7974	0	112.545	220.26	93.6531
bcs-1	WBGene00010042	-2.45539	7.33e-08	3.52e-07	253.252	220.822	240.38	45.2503	50.119	33.054
BE0003N10.1	WBGene00015266	-0.487885	0.515508	0.597898	40.453	158.262	135.633	117.187	75.1785	44.0721
BE0003N10.3	WBGene00015268	-1.1954	0.195187	0.265591	27.39	46.6669	21.4864	11.6026	11.8703	19.2815
BE0003N10.6	WBGene00255598	-0.444576	0.785975	0.833198	68.6858	0	33.5726	17.4039	35.6109	22.036
BE10.1	WBGene00007209	-8.80402	3.5e-09	1.98e-08	71.2141	97.3918	230.979	0	0	0
BE10.4	WBGene00007212	-1.86245	0.0612984	0.100109	89.3336	36.5219	72.5168	38.2887	9.23244	5.50901
BE10.5	WBGene00044127	-6.04948	0.050266	0.0845191	0	38.8891	20.1435	0	0	0
bec-1	WBGene00000247	-0.167305	0.717023	0.774609	328.259	251.934	418.986	201.886	266.422	424.194
bed-1	WBGene00012674	1.68926	3.75e-05	0.000119686	183.303	150.822	174.577	631.183	656.822	347.068
bed-2	WBGene00012943	2.4945	1.13e-06	4.61e-06	257.466	216.426	84.6029	1403.92	957.536	798.806
bed-3	WBGene00009133	-3.89158	6.53e-09	3.58e-08	380.089	400.388	307.525	25.5258	6.5946	44.0721
ben-1	WBGene00000248	2.67236	1.66e-13	1.6e-12	1480.75	750.052	872.887	7136.78	6056.48	6599.79
best-1	WBGene00007203	-0.46493	0.655041	0.721381	18.1196	35.5074	28.201	22.045	5.27568	33.054
best-10	WBGene00008185	-2.49867	0.118593	0.175053	122.623	41.2562	1.3429	12.7629	15.827	0
best-11	WBGene00008186	-1.40556	0.278871	0.357087	34.975	52.7539	2.68581	9.2821	6.5946	19.2815
best-12	WBGene00008821	-1.66496	0.5743	0.650981	29.9183	3.38166	0	0	0	11.018
best-13	WBGene00009323	1.22626	0.0532693	0.0888538	42.9813	79.8071	167.863	200.725	185.968	289.223
best-14	WBGene00009340	-1.95791	0.0142095	0.0275609	844.034	375.364	425.7	82.3787	308.627	30.2995
best-15	WBGene00011258	-5.93148	2.93e-05	9.5e-05	93.5475	57.4882	76.5455	0	0	5.50901
best-16	WBGene00020046	-3.34362	0.34438	0.427676	0	0	55.059	0	5.27568	0
best-17	WBGene00020559	-0.883074	0.344761	0.427965	116.302	44.6379	40.2871	54.5324	44.8433	8.26351
best-18	WBGene00011868	-2.2939	0.00844262	0.0172961	59.8367	110.242	276.638	55.6926	19.7838	13.7725
best-19	WBGene00206487	0.543199	0.133083	0.191969	312.246	268.166	413.614	421.175	461.622	564.673
best-20	WBGene00021368	-8.67462	3.72e-08	1.86e-07	32.0253	150.146	182.635	0	0	0
best-21	WBGene00013520	-3.72147	6.31e-08	3.06e-07	268.001	179.904	235.008	15.0834	6.5946	33.054
best-22	WBGene00013921	2.36583	1.73e-08	9e-08	274.743	124.783	189.349	898.043	1202.86	933.777
best-23	WBGene00014989	2.8988	0.000105071	0.000312422	128.522	33.4784	20.1435	269.181	522.292	578.446
best-24	WBGene00022797	-3.71119	8.4e-13	7.46e-12	939.267	1175.8	1474.51	80.0581	149.038	41.3176
best-25	WBGene00014102	-7.19391	5.88e-05	0.000181672	56.4656	16.5701	57.7448	0	0	0
best-26	WBGene00014103	-5.894	0.0520686	0.0871444	26.1259	26.7151	0	0	0	0
best-3	WBGene00015286	-3.20385	0.00642457	0.0135031	85.9626	82.1743	56.4019	0	9.23244	16.527
best-4	WBGene00015288	-4.22553	0.280801	0.358948	0	16.5701	0	0	0	0
best-5	WBGene00007404	0.463276	0.429039	0.514574	59.4153	76.4255	107.432	124.148	141.124	66.1081
best-6	WBGene00015628	-6.77596	0.000417829	0.00111696	58.1511	16.5701	22.8294	0	0	0
best-7	WBGene00007808	-1.55683	0.216527	0.289727	101.554	32.4639	12.0861	9.2821	36.9298	2.7545
best-8	WBGene00007988	-3.17219	0.0118111	0.0233551	109.139	26.3769	142.348	25.5258	3.95676	0
best-9	WBGene00016613	3.05556	0.0169143	0.0322411	0	28.4059	28.201	169.398	209.708	88.1441
bet-1	WBGene00022473	1.69243	1.15e-05	3.99e-05	638.82	658.409	1098.49	2188.26	2163.03	3385.29
bet-2	WBGene00010199	3.29819	6.61e-24	1.79e-22	232.605	194.784	197.407	2156.93	1529.95	2468.04
bicd-1	WBGene00016611	-3.20425	2.26e-29	9.54e-28	2408.64	2356.68	2778.47	263.38	315.222	236.887
bir-1	WBGene00000249	0.932443	0.075749	0.119817	240.189	163.334	374.67	308.63	435.244	740.962
bir-2	WBGene00000250	-5.25954	0.000295178	0.000811084	29.0756	52.4157	41.63	1.16026	0	2.7545
bkip-1	WBGene00014569	4.01874	0.000690914	0.00177214	0	23.6716	48.3445	279.623	402.271	471.02
bli-1	WBGene00000251	-13.2706	4.67e-26	1.57e-24	3183.99	1936.34	3690.3	0	0	0
bli-2	WBGene00000252	-12.0478	3.59e-37	2.64e-35	8772.82	3972.77	7517.57	0	1.31892	5.50901
bli-3	WBGene00000253	-4.18545	9.81e-19	1.62e-17	678.851	362.176	553.276	29.0066	26.3784	33.054
bli-4	WBGene00000254	-1.52742	1.15e-05	4e-05	2264.94	1311.41	1765.92	529.08	608.022	718.926
bli-5	WBGene00000255	-4.60142	4.98e-05	0.000155727	99.4469	157.247	306.182	3.48079	0	22.036
bli-6	WBGene00000256	-13.8325	1.22e-73	6.21e-71	68283.8	34972.1	60954.4	9.2821	0	0
blmp-1	WBGene00003847	-2.36154	0.00167064	0.00397035	214.064	306.04	145.034	25.5258	85.7298	16.527
blos-1	WBGene00011872	0.137408	0.859417	0.891812	111.667	92.6574	21.4864	106.744	81.7731	60.5991
blos-2	WBGene00022251	-0.169482	0.665909	0.730983	318.989	242.803	296.782	213.488	222.898	330.54
blos-4	WBGene00020783	-0.365118	0.830332	0.869117	0	65.266	16.1148	34.8079	14.5081	13.7725
bmk-1	WBGene00000257	-3.43722	8.66e-05	0.000260623	183.303	204.928	131.604	22.045	23.7406	0
bmy-1	WBGene00017293	-1.8807	0.000963607	0.00239885	261.68	219.808	108.775	48.731	64.6271	46.8266
bnc-1	WBGene00044791	-5.58048	0.00211925	0.00493372	16.434	44.9761	21.4864	1.16026	0	0
bpl-1	WBGene00000259	2.75624	3.05e-06	1.16e-05	37.0819	142.03	115.49	438.579	691.114	859.405
bra-1	WBGene00000262	4.09202	8.94e-19	1.49e-17	120.938	67.6332	85.9458	1123.13	1181.75	2385.4
bra-2	WBGene00017757	0.154004	0.797841	0.842789	74.1638	191.064	189.349	146.193	116.065	245.151
brap-2	WBGene00017144	0.293978	0.477717	0.56215	330.366	245.847	247.094	444.381	245.319	319.522
brc-1	WBGene00000264	-1.75466	0.0295112	0.0527727	137.793	76.7636	72.5168	30.1668	44.8433	8.26351
brc-2	WBGene00020316	-0.310765	0.653955	0.720689	49.3021	195.122	256.494	162.437	126.616	112.935
brd-1	WBGene00000265	-3.86969	0.003389	0.00757361	24.0189	41.9326	51.0303	5.80131	1.31892	0
bre-1	WBGene00000266	1.1966	0.000335152	0.000911825	420.964	462.949	546.562	1176.51	823.006	1278.09
bre-2	WBGene00000267	2.4494	0.000834009	0.00210095	54.7801	24.3479	16.1148	149.674	278.292	96.4076
bre-3	WBGene00000268	-0.163769	0.67486	0.738564	447.09	555.268	674.137	449.022	381.168	669.344
bre-4	WBGene00000269	1.73686	3.36e-05	0.000107871	118.409	125.798	214.864	423.496	571.093	526.11
bre-5	WBGene00000270	-2.63853	0.0103049	0.0206909	139.9	101.45	83.26	16.2437	34.2919	0
brf-1	WBGene00000271	0.143347	0.771626	0.820494	140.743	123.431	162.491	221.61	138.487	107.426
bris-1	WBGene00019726	3.22101	7.78e-18	1.18e-16	177.403	293.19	213.522	1986.37	1652.61	2751.75
bro-1	WBGene00000272	-2.12976	0.490669	0.574041	0	6.42515	20.1435	5.80131	0	0
brp-1	WBGene00000273	-2.22572	6.57e-08	3.17e-07	9296.18	4429.97	7313.45	1847.14	1624.91	1021.92
btb-1	WBGene00001963	-3.39852	0.0556557	0.0922224	26.1259	9.80681	80.5742	0	10.5514	0
btb-11	WBGene00019700	-1.48866	0.708265	NA	0	0	2.68581	0	0	0
btb-13	WBGene00022561	3.67989	0.359553	NA	0	0	0	0	3.95676	0
btb-14	WBGene00013275	-2.48109	6.74e-06	2.44e-05	399.052	190.049	517.018	64.9747	81.7731	49.5811
btb-16	WBGene00018195	-0.0877021	0.924218	0.941787	20.6479	266.813	85.9458	134.59	155.633	60.5991
btb-17	WBGene00018200	-0.515244	0.562871	0.640538	33.2894	59.5172	94.0032	78.8979	35.6109	13.7725
btb-18	WBGene00018201	1.39519	0.645812	0.714083	0	9.46864	0	9.2821	15.827	0
btb-19	WBGene00010194	-3.08116	0.0358314	0.0626219	55.6228	62.2225	4.02871	5.80131	7.91352	0
btb-2	WBGene00020802	-3.15918	0.0048761	0.0105149	50.1448	41.2562	143.691	19.7245	2.63784	2.7545
btb-20	WBGene00010193	-5.3604	0.00659757	0.0138265	76.6921	45.6524	1.3429	0	2.63784	0
btb-21	WBGene00018540	0.190664	0.903406	0.92653	29.0756	72.3675	0	17.4039	9.23244	90.8986
btb-3	WBGene00015013	-3.42481	0.383027	NA	0	9.46864	0	0	0	0
btb-4	WBGene00019142	-1.4865	0.289925	0.36898	27.8114	21.9808	12.0861	8.12184	13.1892	0
btb-5	WBGene00021042	5.27675	0.000361989	0.000979003	0	3.71982	0	48.731	59.3514	55.0901
btb-7	WBGene00018443	-3.47491	0.376027	NA	0	9.80681	0	0	0	0
btb-9	WBGene00018435	0.81414	0.234417	0.309558	35.8177	56.1355	30.8868	54.5324	106.833	55.0901
btbd-10	WBGene00019888	1.39926	0.00042687	0.00113832	577.298	603.964	1042.09	2010.74	1442.9	2404.68
btf-1	WBGene00000274	1.03722	0.00677363	0.0141664	179.089	214.397	134.29	358.521	325.773	404.912
bub-1	WBGene00000275	-5.03329	1.52e-12	1.31e-11	385.567	470.389	330.354	24.3655	6.5946	2.7545
bub-3	WBGene00013209	-0.871268	0.164783	0.229171	178.667	294.204	142.348	177.52	104.195	52.3356
bus-1	WBGene00044617	3.35062	0.0702728	0.112634	0	0	26.8581	63.8145	133.211	68.8626
bus-12	WBGene00010442	-3.8568	0.000597564	0.00155082	93.9689	60.5317	139.662	0	7.91352	13.7725
bus-17	WBGene00044630	-7.0181	0.00621608	0.0131174	61.5222	53.7684	0	0	0	0
bus-18	WBGene00044631	0.493489	0.89615	0.920335	0	9.46864	0	0	0	13.7725
bus-19	WBGene00011590	-4.77734	1.15e-13	1.13e-12	1046.3	626.959	648.622	19.7245	54.0757	8.26351
bus-2	WBGene00044618	0.40794	0.461458	0.546288	79.6418	115.991	175.92	225.091	145.081	118.444
bus-4	WBGene00044620	-4.75045	0.000699371	0.00179171	277.271	172.465	384.07	0	0	33.054
bus-8	WBGene00044623	-4.12546	2.52e-19	4.46e-18	493.442	383.48	479.416	27.8463	18.4649	33.054
byn-1	WBGene00000276	0.311017	0.432475	0.517799	751.751	746.332	778.884	1373.75	812.455	633.536
C01A2.1	WBGene00007213	3.30397	0.0779206	0.122748	0	0	22.8294	102.103	63.3082	52.3356
C01A2.2	WBGene00007214	-2.78499	0.000593148	0.00154028	257.888	188.358	65.8022	18.5642	43.5244	11.018
C01A2.4	WBGene00007216	-0.657878	0.0573677	0.0945983	482.065	375.026	546.562	317.912	262.465	308.504
C01A2.6	WBGene00007218	-2.87244	0.465394	NA	0	6.42515	0	0	0	0
C01A2.9	WBGene00077546	-5.13225	NA	NA	31.1825	0	0	0	0	0
C01B10.10	WBGene00015284	-0.859759	0.301416	0.381647	37.9247	44.9761	154.434	51.0516	50.119	27.545
C01B10.11	WBGene00044294	-3.2997	1.98e-11	1.48e-10	1175.66	743.289	910.488	70.776	61.9893	159.761
C01B10.3	WBGene00015278	-2.65835	2.73e-05	8.89e-05	415.907	380.098	204.121	40.6092	91.0055	24.7905
C01B10.4	WBGene00015279	-1.08215	0.563864	0.641499	64.4719	38.5509	0	23.2053	25.0595	0
C01B10.44	WBGene00194839	-3.20494	0.414685	NA	0	8.11598	0	0	0	0
C01B10.6	WBGene00015280	-0.772185	0.0612548	0.100057	840.663	642.515	649.965	343.438	602.747	300.241
C01B10.7	WBGene00015281	-3.5082	0.192706	0.262593	35.8177	11.1595	0	0	3.95676	0
C01B10.8	WBGene00015282	-0.578256	0.409776	0.495204	280.221	105.508	92.6603	153.155	113.427	52.3356
C01B10.9	WBGene00015283	0.23174	0.580778	0.656735	177.825	157.923	260.523	248.296	196.519	253.414
C01B12.8	WBGene00015291	-6.08021	8.99e-22	2.04e-20	399.052	566.766	902.431	8.12184	5.27568	16.527
C01B12.9	WBGene00022904	1.1901	0.751542	0.804253	0	11.8358	0	0	0	27.545
C01B7.10	WBGene00197279	-0.711573	0.852904	NA	0	8.45415	0	0	0	5.50901
C01B9.1	WBGene00007220	0.992148	0.443482	0.528372	1.68554	28.4059	16.1148	40.6092	42.2055	8.26351
C01B9.3	WBGene00044129	0.58206	0.886334	NA	0	0.338166	0	0	0	0
C01B9.4	WBGene00194890	-5.03315	NA	NA	0	29.0823	0	0	0	0
C01B9.5	WBGene00194939	-0.591369	NA	NA	0	24.3479	0	0	0	16.527
C01C10.2	WBGene00015294	-2.19923	0.0134096	0.0261703	272.636	124.107	138.319	20.8847	85.7298	8.26351
C01C4.2	WBGene00015292	0.663026	0.663505	0.728713	24.0189	13.5266	0	18.5642	11.8703	30.2995
C01C4.3	WBGene00015293	4.04735	1.48e-28	5.88e-27	188.781	135.266	94.0032	2538.66	2105	2316.54
C01F1.1	WBGene00015296	-2.26365	3.89e-08	1.94e-07	1248.14	1673.58	2676.41	385.207	311.265	471.02
C01F1.3	WBGene00015298	-1.98266	0.00266257	0.00608829	653.147	192.078	237.694	88.18	131.892	52.3356
C01F1.4	WBGene00015299	3.85132	0.000421219	0.00112533	72.4782	14.8793	0	389.848	441.838	443.475
C01F1.5	WBGene00015300	-3.14604	2.25e-08	1.15e-07	389.781	207.296	252.466	44.09	21.1027	30.2995
C01F1.6	WBGene00015301	2.84462	1.95e-11	1.46e-10	219.12	172.803	95.3461	1337.78	1233.19	947.549
C01F6.13	WBGene00199478	-2.09894	0.595558	NA	0	3.71982	0	0	0	0
C01F6.14	WBGene00219207	-0.76154	0.273594	0.352045	213.642	73.0438	65.8022	69.6158	80.4541	57.8446
C01F6.16	WBGene00235286	4.64816	0.240961	NA	0	0	0	0	0	8.26351
C01F6.2	WBGene00007222	-2.48967	1.3e-07	6.02e-07	404.53	384.833	472.702	111.385	58.0325	52.3356
C01F6.9	WBGene00007223	-0.820752	0.00981975	0.0198131	525.889	643.53	577.448	298.188	308.627	385.631
C01G10.1	WBGene00007230	-3.77574	0.0529644	0.0884389	27.39	10.145	24.1723	0	0	5.50901
C01G10.10	WBGene00007237	-0.805136	0.524011	0.605896	27.39	59.179	104.746	69.6158	38.2487	0
C01G10.14	WBGene00007239	-7.56885	1.93e-06	7.56e-06	53.5159	52.7539	63.1164	0	0	0
C01G10.15	WBGene00007240	-0.0619913	0.96148	0.970997	22.7548	8.11598	9.40032	4.64105	7.91352	27.545
C01G10.16	WBGene00007241	0.944019	0.240988	0.316955	12.6416	53.7684	72.5168	83.5389	106.833	74.3716
C01G10.4	WBGene00007231	-2.62851	0.504683	NA	0	5.41065	0	0	0	0
C01G10.5	WBGene00007232	0.58206	0.886334	NA	0	0.338166	0	0	0	0
C01G10.6	WBGene00007233	-2.53706	0.519848	NA	0	5.07249	0	0	0	0
C01G10.7	WBGene00007234	-1.09398	0.039716	0.0686432	85.5412	125.121	128.919	54.5324	56.7136	46.8266
C01G10.8	WBGene00007235	-0.639924	0.113671	0.169011	1556.6	1617.11	1273.07	751.85	676.606	1432.34
C01G10.9	WBGene00007236	-2.72654	0.00547049	0.0116776	222.913	243.141	365.27	61.4939	61.9893	0
C01G12.12	WBGene00044053	-1.13627	0.624597	0.695806	29.0756	5.74882	0	0	7.91352	8.26351
C01G12.13	WBGene00044333	-4.14705	0.000707613	0.00180989	18.1196	72.0293	104.746	3.48079	6.5946	0
C01G12.16	WBGene00219299	-4.33805	0.268087	0.345754	0	17.9228	0	0	0	0
C01G12.3	WBGene00007244	-7.91123	5.12e-07	2.18e-06	81.7487	93.3338	38.9442	0	0	0
C01G12.5	WBGene00007245	-2.94537	0.453986	NA	0	6.76332	0	0	0	0
C01G12.7	WBGene00007247	5.28491	7.2e-11	5.04e-10	26.1259	4.73432	71.1739	1997.97	1078.88	812.579
C01G12.9	WBGene00007249	-7.93236	1.78e-07	8.09e-07	85.9626	63.237	68.4881	0	0	0
C01G5.25	WBGene00235291	2.98687	6.06e-13	5.49e-12	250.724	112.947	204.121	1222.92	1562.92	1710.55
C01G5.3	WBGene00015305	-10.3227	1.08e-15	1.31e-14	318.146	362.514	461.959	0	0	0
C01G5.4	WBGene00015306	-6.47227	0.0251582	0.0457336	0	42.9471	36.2584	0	0	0
C01G5.5	WBGene00015307	2.22021	2.74e-05	8.92e-05	162.233	78.7926	52.3732	410.733	486.682	479.284
C01G5.6	WBGene00015308	-1.77969	0.000202039	0.000571922	530.945	313.48	255.152	85.8595	120.022	115.689
C01G5.7	WBGene00015309	6.22732	1.35e-06	5.44e-06	0	3.04349	0	106.744	98.919	63.3536
C01G5.9	WBGene00015311	0.263936	0.73862	0.793621	34.1322	17.9228	40.2871	32.4874	29.0162	49.5811
C01G6.10	WBGene00014663	6.12224	0.118207	0.174513	0	0	0	5.80131	0	16.527
C01G6.13	WBGene00202300	4.70282	0.235227	NA	0	0	0	8.12184	0	0
C01G6.2	WBGene00007224	-5.65077	0.000123729	0.000363291	56.4656	40.2417	49.6874	2.32053	0	0
C01G6.3	WBGene00007225	-2.23504	0.0175475	0.0333163	112.088	32.8021	102.061	13.9232	31.6541	5.50901
C01G6.4	WBGene00007226	1.61312	0.000112554	0.000333016	591.625	579.616	265.895	1544.31	1241.1	1622.4
C01G6.5	WBGene00007227	0.159855	0.743068	0.797116	1529.63	2060.78	3855.47	1659.18	2893.71	3765.41
C01G6.9	WBGene00007229	-3.63405	0.00140033	0.00337792	126.837	51.4012	79.2313	8.12184	0	13.7725
C01G8.1	WBGene00015312	-4.69432	5.63e-11	3.99e-10	291.177	307.055	201.435	4.64105	19.7838	5.50901
C01H6.2	WBGene00007252	-1.18397	0.274221	0.352548	37.5033	35.5074	53.7161	6.96158	42.2055	5.50901
C01H6.3	WBGene00007253	2.71757	0.00163087	0.00388562	49.7234	7.10148	14.7719	92.821	159.589	223.115
C01H6.4	WBGene00007254	-1.88222	0.206288	0.278091	184.567	47.3432	0	27.8463	13.1892	22.036
C01H6.6	WBGene00007255	-1.41097	0.153916	0.216067	56.887	66.9568	162.491	4.64105	48.8001	55.0901
C01H6.8	WBGene00007257	-6.32693	1.51e-08	7.9e-08	216.171	108.551	147.719	0	5.27568	0
C01H6.9	WBGene00007258	-3.91856	8.32e-06	2.97e-05	96.4972	148.117	214.864	15.0834	13.1892	0
C02B10.3	WBGene00015328	3.58958	8.56e-23	2.11e-21	684.751	470.727	598.935	5062.23	6432.37	9626.99
C02B10.4	WBGene00015329	0.357281	0.401513	0.486812	182.46	341.209	291.41	370.124	275.654	399.403
C02B10.5	WBGene00015330	1.21003	6.91e-05	0.000211257	374.19	392.949	337.069	1009.43	774.206	771.261
C02B10.6	WBGene00015331	-5.53157	0.0881104	0.136465	24.8617	16.232	0	0	0	0
C02B4.3	WBGene00007259	-2.87185	0.465487	NA	0	0	6.71452	0	0	0
C02B4.4	WBGene00045386	3.6194	2.95e-13	2.77e-12	71.2141	49.034	24.1723	497.753	692.433	614.254
C02B8.1	WBGene00015320	-2.31243	0.406866	0.492064	0	12.174	34.9155	0	9.23244	0
C02B8.11	WBGene00200631	-4.27567	0.275085	0.353183	0	0	17.4577	0	0	0
C02B8.12	WBGene00219375	0.263342	0.882276	0.90933	0	9.46864	26.8581	8.12184	15.827	19.2815
C02B8.3	WBGene00015322	3.55184	1.51e-14	1.62e-13	160.969	78.7926	141.005	1610.44	911.374	1936.42
C02B8.6	WBGene00015324	0.145807	0.823956	0.864168	37.9247	85.556	104.746	87.0197	60.6703	104.671
C02C6.10	WBGene00201551	-5.49111	0.160358	0.223879	0	0	40.2871	0	0	0
C02C6.11	WBGene00201714	5.24671	0.183507	NA	0	0	0	9.2821	2.63784	0
C02C6.12	WBGene00202257	5.23649	0.184391	NA	0	0	0	0	11.8703	0
C02C6.6	WBGene00197114	3.54936	0.377475	NA	0	0	0	3.48079	0	0
C02D4.12	WBGene00199850	2.44881	0.548421	NA	0	0	0	0	0	2.7545
C02D4.15	WBGene00201167	-3.44563	0.380109	NA	0	4.39616	5.37161	0	0	0
C02D4.6	WBGene00197838	5.72975	0.145269	0.205947	0	0	0	12.7629	3.95676	0
C02D5.2	WBGene00015336	0.0512101	0.914764	0.934721	212.799	115.653	251.123	178.68	195.2	225.869
C02D5.4	WBGene00043097	-0.227692	0.657275	0.723382	555.386	440.968	449.873	300.508	697.709	234.133
C02E7.10	WBGene00015342	6.09498	0.120739	0.177301	0	0	0	0	0	22.036
C02E7.6	WBGene00015339	-8.61731	3.89e-54	8.65e-52	10748.3	4365.04	7876.13	22.045	27.6973	5.50901
C02E7.7	WBGene00015340	-9.00167	2.04e-05	6.78e-05	7156.8	2263.01	8351.51	0	34.2919	0
C02E7.8	WBGene00015341	5.14073	0.19284	NA	0	0	0	5.80131	5.27568	0
C02F12.5	WBGene00015355	-3.29552	0.0021352	0.00496685	210.271	185.991	216.207	0	32.973	30.2995
C02F12.8	WBGene00015357	0.0919807	0.883603	0.910125	152.963	75.411	247.094	234.373	163.546	104.671
C02F12.9	WBGene00015358	9.75381	7.99e-11	5.57e-10	0	0	0	131.11	71.2217	71.6171
C02F4.10	WBGene00196852	0.0145001	0.996996	NA	0	5.07249	0	0	0	5.50901
C02F4.12	WBGene00220252	7.4104	0.0010144	0.00251269	0	0	0	16.2437	7.91352	30.2995
C02F4.4	WBGene00007264	-6.5163	3.33e-14	3.45e-13	767.764	307.393	564.019	0	6.5946	13.7725
C02F5.10	WBGene00015351	-6.02779	3.72e-08	1.86e-07	146.642	218.455	404.214	10.4424	0	0
C02F5.12	WBGene00015352	1.01667	0.0818914	0.128246	43.4027	138.648	119.518	199.565	213.665	195.57
C02F5.13	WBGene00015353	0.591812	0.371145	0.455889	109.982	107.199	33.5726	168.238	112.108	99.1621
C02F5.14	WBGene00044445	-10.2307	3.88e-14	4e-13	535.159	342.562	192.035	0	0	0
C02F5.2	WBGene00015345	-5.11708	0.157771	0.220748	0	14.8793	16.1148	0	0	0
C02F5.3	WBGene00015346	0.499534	0.140876	0.200867	534.738	569.133	453.901	865.556	786.077	548.146
C02F5.5	WBGene00015348	-8.64875	7.81e-11	5.45e-10	294.97	164.349	237.694	0	1.31892	0
C02F5.7	WBGene00015350	2.49389	1.34e-11	1.03e-10	772.399	603.626	506.274	4769.84	3230.04	2608.52
C02G6.1	WBGene00015359	-3.3669	0.0294443	0.0526585	120.516	14.203	12.0861	0	6.5946	8.26351
C02G6.3	WBGene00044803	-1.05441	0.528783	0.610275	0	53.4302	94.0032	48.731	7.91352	13.7725
C02H6.1	WBGene00015361	-5.62984	0.0842073	0.13128	37.9247	6.08699	0	0	0	0
C02H6.3	WBGene00220257	1.54306	0.519277	0.60132	0	9.80681	0	10.4424	10.5514	8.26351
C03A3.1	WBGene00007266	2.56537	1.38e-06	5.55e-06	81.7487	38.8891	130.262	504.714	452.39	512.338
C03A3.2	WBGene00007267	0.929802	0.0108013	0.0215653	519.989	406.137	334.383	742.568	658.141	1008.15
C03A3.3	WBGene00007268	5.81524	3.04e-05	9.83e-05	8.84909	0	0	106.744	113.427	305.75
C03A3.9	WBGene00284849	-0.736963	0.578699	0.654683	77.9562	63.237	2.68581	31.3271	3.95676	52.3356
C03A7.15	WBGene00199455	-0.0590556	0.988324	NA	0	0.676332	0	0	0	0
C03B1.1	WBGene00015372	7.67591	0.00907711	0.0184694	0	0	0	0	15.827	49.5811
C03B1.13	WBGene00015381	-1.03132	0.349084	0.432434	7.16355	68.6477	32.2297	12.7629	21.1027	19.2815
C03B1.14	WBGene00015382	-2.50093	0.0256677	0.046567	66.1575	59.5172	59.0877	23.2053	7.91352	0
C03B1.2	WBGene00015373	4.55513	0.00402203	0.00885142	0	12.8503	0	109.065	38.2487	168.025
C03B1.4	WBGene00015375	3.91339	0.328027	NA	0	0	0	4.64105	0	0
C03B1.5	WBGene00015376	0.290134	0.871798	0.900729	0	5.41065	36.2584	15.0834	10.5514	24.7905
C03B1.6	WBGene00015377	4.82399	0.00183039	0.00431864	0	5.74882	0	42.9297	81.7731	52.3356
C03B1.7	WBGene00015378	0.255995	0.84594	0.88083	0.84277	32.1258	169.206	52.2118	67.2649	121.198
C03B8.3	WBGene00015386	-4.48803	0.000598897	0.00155382	86.8053	114.638	111.461	0	13.1892	0
C03C10.2	WBGene00007269	-2.23703	0.388613	0.473721	0	53.092	34.9155	0	0	19.2815
C03C10.4	WBGene00007270	-1.31591	0.00488666	0.0105324	260.837	253.963	263.209	149.674	83.092	77.1261
C03C11.1	WBGene00007274	-0.784899	0.311582	0.392653	55.6228	78.1163	104.746	64.9747	15.827	57.8446
C03D6.1	WBGene00007275	-1.53179	0.0286051	0.0512792	73.7424	67.9713	95.3461	37.1284	29.0162	13.7725
C03D6.9	WBGene00219796	-2.33462	0.554221	NA	0	4.39616	0	0	0	0
C03E10.3	WBGene00007281	9.93956	1.55e-10	1.04e-09	0	0	0	68.4555	55.3947	190.061
C03F11.2	WBGene00015388	-7.56967	4.95e-06	1.83e-05	88.0695	47.3432	33.5726	0	0	0
C03F11.4	WBGene00015390	0.43412	0.384423	0.469472	201.001	201.885	276.638	232.053	204.433	484.793
C03G5.14	WBGene00219371	8.36238	7.34e-06	2.64e-05	0	0	0	44.09	43.5244	16.527
C03G6.17	WBGene00015402	2.39864	0.0628247	0.102284	57.3084	41.9326	0	135.751	352.152	38.5631
C03G6.21	WBGene00235116	5.67349	0.149372	0.210439	0	0	0	0	0	16.527
C03G6.5	WBGene00015393	1.05924	0.28954	0.368706	26.9686	71.0148	83.26	97.4621	263.784	13.7725
C03H12.1	WBGene00007284	-0.687218	0.212676	0.285416	318.567	118.696	247.094	160.116	102.876	162.516
C03H5.10	WBGene00255736	4.74698	0.0695321	0.111694	0	0	2.68581	33.6476	27.6973	0
C03H5.3	WBGene00015405	-0.921899	0.0307883	0.054791	299.183	293.528	209.493	176.36	114.746	132.216
C03H5.4	WBGene00015406	2.38421	0.443531	0.528374	0	5.07249	0	24.3655	2.63784	0
C03H5.5	WBGene00015407	-1.57925	0.0125831	0.0247059	101.975	131.208	150.405	39.4489	64.6271	22.036
C03H5.6	WBGene00015408	4.82368	1.03e-34	6.44e-33	166.026	113.286	204.121	3109.5	4810.1	5707.33
C03H5.7	WBGene00015409	11.1555	2.75e-15	3.22e-14	0	0	0	397.97	117.384	209.342
C03H5.9	WBGene00206366	10.0746	7.58e-12	6.02e-11	0	0	0	119.507	64.6271	159.761
C04A11.1	WBGene00007285	1.84147	4.35e-05	0.000137594	90.1764	60.1935	71.1739	299.348	296.757	195.57
C04A11.2	WBGene00007286	6.99034	0.0286253	0.0513102	0	0	0	24.3655	15.827	0
C04A11.5	WBGene00007288	0.0636724	0.983348	0.98739	0	19.6136	0	4.64105	15.827	0
C04A2.11	WBGene00200874	2.44881	0.548421	NA	0	0	0	1.16026	0	0
C04A2.15	WBGene00206529	3.03148	0.292232	0.371561	0	4.39616	0	12.7629	0	24.7905
C04B4.2	WBGene00007290	-6.31883	0.00011952	0.000351706	71.2141	25.7006	41.63	0	1.31892	0
C04B4.4	WBGene00007292	4.75319	0.230029	NA	0	0	0	5.80131	0	2.7545
C04C11.1	WBGene00007295	0.567311	0.346426	0.429755	54.3587	88.2613	99.3748	73.0966	110.789	176.288
C04C11.17	WBGene00200450	3.54936	0.377475	NA	0	0	0	3.48079	0	0
C04C11.25	WBGene00284855	-8.07967	0.00044238	0.00117625	144.114	96.7154	0	0	0	0
C04C3.14	WBGene00219410	-7.31971	4.63e-05	0.000145592	71.6355	14.5411	56.4019	0	0	0
C04C3.4	WBGene00015414	-2.79563	0.47758	NA	0	6.08699	0	0	0	0
C04C3.6	WBGene00015416	4.2029	0.00962652	0.0194731	0	25.0243	0	293.547	113.427	63.3536
C04C3.9	WBGene00195067	-0.973121	0.488893	0.572504	60.6795	9.13048	55.059	45.2503	17.146	0
C04D8.2	WBGene00197048	5.67349	0.149372	0.210439	0	0	0	0	0	16.527
C04D8.4	WBGene00201566	-1.57786	0.688962	NA	0	0	5.37161	0	0	2.7545
C04E12.10	WBGene00015439	4.96059	0.209521	NA	0	0	0	5.80131	3.95676	0
C04E12.2	WBGene00015433	-3.66253	0.00180335	0.00426006	92.2833	54.7829	65.8022	4.64105	0	13.7725
C04E12.4	WBGene00015434	-1.38172	0.229273	0.303851	60.6795	52.0775	104.746	38.2887	43.5244	0
C04E6.11	WBGene00015425	-1.34847	0.385464	0.470478	113.353	107.199	0	17.4039	63.3082	5.50901
C04E6.12	WBGene00015426	0.0401109	0.979037	0.984258	0	54.4447	63.1164	27.8463	51.4379	41.3176
C04E6.13	WBGene00015427	1.81164	0.000113366	0.000335133	384.725	226.909	306.182	1311.1	1346.62	559.164
C04E6.4	WBGene00015421	-4.50914	0.24953	0.326064	2.9497	17.2465	0	0	0	0
C04E6.5	WBGene00015422	-4.23122	0.0590093	0.0968908	0	40.5799	36.2584	1.16026	2.63784	0
C04E6.7	WBGene00015423	2.53128	1.97e-05	6.58e-05	239.347	132.561	56.4019	516.317	1006.34	966.831
C04E6.8	WBGene00015424	2.22502	4.79e-06	1.77e-05	53.0945	47.6814	38.9442	169.398	291.481	195.57
C04E7.1	WBGene00015428	5.23649	0.184391	NA	0	0	0	0	11.8703	0
C04E7.3	WBGene00015430	1.52511	0.000396792	0.00106714	179.089	103.479	204.121	381.726	515.698	498.565
C04E7.5	WBGene00045270	-1.56439	0.559928	0.63811	26.1259	0	45.6587	0	0	24.7905
C04F1.1	WBGene00015442	-8.40627	1.2e-06	4.88e-06	235.976	28.4059	37.6013	0	0	0
C04F12.1	WBGene00007297	-0.287959	0.673762	0.737735	258.309	169.421	103.404	225.091	155.633	52.3356
C04F12.12	WBGene00077685	-7.15269	0.000134486	0.000392747	13.9057	81.8361	30.8868	0	0	0
C04F12.15	WBGene00198151	2.44881	0.548421	NA	0	0	0	1.16026	0	0
C04F12.16	WBGene00219286	-2.93694	0.000478797	0.00126424	38.346	107.199	155.777	16.2437	9.23244	13.7725
C04F12.5	WBGene00007299	0.465265	0.363532	0.447837	327.416	157.923	155.777	337.636	345.557	201.079
C04F12.6	WBGene00007300	-4.86019	0.202127	0.273412	0	12.5121	13.429	0	0	0
C04F12.7	WBGene00007301	-5.04464	2.88e-28	1.13e-26	1208.53	1287.06	700.995	25.5258	40.8865	30.2995
C04F12.8	WBGene00007302	1.3792	0.012574	0.024698	335.001	91.3048	185.321	481.509	469.536	641.799
C04F5.2	WBGene00015444	1.91989	0.370657	0.455515	0	0	25.5152	17.4039	30.3352	46.8266
C04F5.8	WBGene00015450	-1.58062	0.000115303	0.000340086	263.366	344.253	398.842	111.385	129.254	93.6531
C04F5.9	WBGene00015451	0.345875	0.540076	0.620377	52.2518	62.8988	102.061	98.6223	79.1352	96.4076
C04F6.7	WBGene00195081	9.25937	7.23e-08	3.47e-07	0	0	0	17.4039	81.7731	96.4076
C04G2.10	WBGene00007309	-6.02746	1.22e-08	6.47e-08	277.693	381.113	504.932	16.2437	0	0
C04G2.12	WBGene00045104	-5.85197	0.0555277	0.0920719	25.2831	26.0388	0	0	0	0
C04G2.14	WBGene00255426	-7.65949	0.00143436	0.00345425	123.466	56.4737	0	0	0	0
C04G2.2	WBGene00007305	-2.91846	0.0136184	0.0265301	46.7737	149.131	153.091	22.045	0	24.7905
C04G2.3	WBGene00014665	-10.87	1.74e-17	2.54e-16	455.096	716.912	495.531	0	0	0
C04G2.5	WBGene00007306	-5.34474	NA	NA	1.26416	34.8311	0	0	0	0
C04G2.8	WBGene00007307	-8.15954	1.84e-37	1.38e-35	1005.42	1436.19	1714.89	5.80131	6.5946	0
C04G2.9	WBGene00007308	-8.45135	2.5e-45	3.33e-43	1811.96	1622.52	1659.83	8.12184	3.95676	0
C04G6.10	WBGene00015458	-6.59977	0.00309174	0.00696949	114.617	53.4302	0	1.16026	0	0
C04G6.12	WBGene00045083	0.357125	0.929898	NA	0	0	1.3429	0	0	0
C04G6.13	WBGene00077489	-0.834199	0.71546	0.773339	17.2768	0	28.201	0	14.5081	11.018
C04G6.15	WBGene00269376	2.44881	0.548421	NA	0	0	0	0	1.31892	0
C04G6.2	WBGene00015453	-8.14605	9.67e-19	1.6e-17	1131	441.306	983.005	1.16026	0	11.018
C04G6.4	WBGene00015454	1.39072	0.000270581	0.000748358	117.145	183.286	136.976	360.842	367.979	421.439
C04G6.5	WBGene00015455	-0.323032	0.690452	0.752447	164.762	53.7684	33.5726	54.5324	94.9623	52.3356
C04G6.6	WBGene00015456	-2.62557	0.0429988	0.0735838	22.7548	63.237	135.633	5.80131	29.0162	0
C04G6.7	WBGene00015457	-8.47224	9.28e-09	4.98e-08	128.522	60.8699	127.576	0	0	0
C04H4.1	WBGene00007311	8.13878	2.17e-05	7.2e-05	0	0	0	20.8847	22.4216	46.8266
C04H4.2	WBGene00196010	0.58206	0.886334	NA	0	0.338166	0	0	0	0
C04H4.5	WBGene00197085	-2.94537	0.453986	NA	0	6.76332	0	0	0	0
C04H4.6	WBGene00198436	-5.02474	0.168962	0.234569	24.8617	4.05799	0	0	0	0
C04H5.1	WBGene00007312	3.56177	0.000413335	0.00110699	42.5599	41.2562	0	317.912	356.109	330.54
C04H5.7	WBGene00007315	-7.094	9.26e-05	0.000277582	48.4593	15.8938	57.7448	0	0	0
C04H5.9	WBGene00044054	-2.43939	0.536295	NA	0	4.73432	0	0	0	0
C05A2.2	WBGene00200743	4.64816	0.240961	NA	0	0	0	0	0	8.26351
C05A2.4	WBGene00220253	5.2095	0.186744	NA	0	0	0	11.6026	0	0
C05A9.2	WBGene00007317	2.21795	2.96e-06	1.13e-05	191.73	80.4835	91.3174	560.407	598.79	537.128
C05B10.17	WBGene00200526	5.07193	0.199088	NA	0	0	0	0	5.27568	5.50901
C05B10.18	WBGene00200701	4.65796	0.239926	NA	0	0	0	0	7.91352	0
C05B10.20	WBGene00202097	5.40534	0.170185	NA	0	0	0	0	0	13.7725
C05B5.10	WBGene00044130	6.94965	0.0363658	0.0634535	0	0	0	9.2821	0	30.2995
C05B5.11	WBGene00045242	-2.53706	0.519848	NA	0	5.07249	0	0	0	0
C05B5.12	WBGene00194886	-1.31214	0.527171	0.608738	20.6479	9.13048	29.5439	0	0	24.7905
C05B5.16	WBGene00219280	6.51959	0.0965018	0.14727	0	0	0	29.0066	0	0
C05B5.2	WBGene00007320	-9.70905	3.37e-12	2.79e-11	112.51	318.552	315.582	0	0	0
C05B5.4	WBGene00007321	1.97055	0.200867	0.271877	29.0756	2.029	0	49.8913	51.4379	22.036
C05B5.5	WBGene00007322	-0.983407	0.642354	0.711021	31.6039	10.4831	0	10.4424	10.5514	0
C05B5.8	WBGene00007324	-3.32087	1.25e-09	7.51e-09	677.587	336.813	381.384	64.9747	27.6973	46.8266
C05C10.2	WBGene00007329	0.453304	0.402019	0.487324	82.5915	145.749	157.12	199.565	108.151	220.36
C05C10.3	WBGene00007330	-0.14366	0.680153	0.743466	993.205	1214.02	1259.64	1021.03	1354.53	757.489
C05C10.5	WBGene00007332	-5.477	2.6e-10	1.7e-09	136.95	182.271	127.576	3.48079	5.27568	0
C05C10.7	WBGene00007334	-4.86625	0.0315516	0.0559712	45.0882	77.1018	0	0	3.95676	0
C05C12.1	WBGene00007335	-8.06441	6.65e-08	3.21e-07	67.0002	81.8361	89.9745	0	0	0
C05C12.4	WBGene00007336	-0.731875	0.176902	0.24403	489.228	714.883	370.641	216.969	531.525	198.324
C05C12.5	WBGene00007337	-3.82511	0.00267407	0.00611055	50.5662	155.894	81.9171	0	17.146	2.7545
C05C12.6	WBGene00007338	3.45345	4.2e-13	3.88e-12	29.497	28.7441	24.1723	280.784	221.579	410.421
C05C8.1	WBGene00015460	-1.03355	0.0452825	0.0769603	260.416	187.682	300.81	69.6158	135.849	162.516
C05C8.10	WBGene00197520	4.87766	0.217551	NA	0	0	0	0	9.23244	0
C05C8.2	WBGene00015461	-1.16973	0.0206157	0.0383606	150.013	324.977	354.526	134.59	114.746	118.444
C05C8.5	WBGene00015462	-0.577336	0.487546	0.571351	31.6039	140.339	47.0016	68.4555	39.5676	38.5631
C05C8.7	WBGene00015464	-2.76597	7.17e-13	6.41e-12	548.222	566.09	437.786	81.2184	60.6703	88.1441
C05C8.8	WBGene00015465	0.568468	0.757951	0.809272	0	3.38166	38.9442	37.1284	7.91352	16.527
C05C9.1	WBGene00007325	-1.68648	0.132098	0.190936	92.2833	18.9373	32.2297	26.686	3.95676	13.7725
C05C9.2	WBGene00007326	5.66696	3.49e-05	0.000111775	0	5.07249	0	84.6992	65.946	137.725
C05C9.3	WBGene00007327	-0.690154	0.625213	0.696358	28.2328	36.5219	63.1164	19.7245	0	60.5991
C05D10.2	WBGene00015478	4.7695	1.84e-19	3.3e-18	22.3334	53.092	21.4864	683.395	757.06	1250.54
C05D10.4	WBGene00015480	-1.31361	0.00158836	0.00379927	830.971	433.529	518.361	226.251	209.708	283.714
C05D11.1	WBGene00015481	-0.119651	0.667906	0.732392	872.689	748.699	799.027	813.344	755.741	655.572
C05D11.13	WBGene00015488	0.367377	0.576691	0.652923	62.365	213.721	331.697	197.245	282.249	302.995
C05D11.5	WBGene00015483	-1.73655	0.0166692	0.0318159	142.85	71.353	55.059	31.3271	19.7838	30.2995
C05D11.8	WBGene00015485	-0.509997	0.344676	0.427891	196.787	98.4063	263.209	125.308	143.762	121.198
C05D11.9	WBGene00015486	-0.48875	0.411807	0.497104	113.774	111.595	145.034	59.1734	61.9893	145.989
C05D12.1	WBGene00007339	-9.17296	9.19e-12	7.22e-11	179.931	165.363	169.206	0	0	0
C05D12.2	WBGene00007340	3.04436	1.22e-07	5.7e-07	13.9057	28.7441	22.8294	190.283	133.211	217.606
C05D12.3	WBGene00014666	-0.852638	0.200155	0.271125	332.894	158.6	236.351	45.2503	196.519	162.516
C05D12.4	WBGene00007341	0.900782	0.707413	0.766884	0	11.8358	5.37161	0	10.5514	22.036
C05D12.7	WBGene00044029	4.65441	1.37e-12	1.19e-11	47.6165	50.3867	6.71452	689.196	875.763	1132.1
C05D2.10	WBGene00015470	1.51476	6.26e-08	3.04e-07	481.222	461.935	522.389	1579.12	1197.58	1407.55
C05D2.14	WBGene00197335	2.44881	0.548421	NA	0	0	0	0	1.31892	0
C05D2.8	WBGene00015469	-0.819479	0.157229	0.220042	361.127	337.828	267.238	85.8595	315.222	145.989
C05D9.12	WBGene00219800	-1.9875	0.217856	0.291115	41.7171	24.0098	42.9729	0	1.31892	27.545
C05D9.3	WBGene00015472	-1.48334	0.0025205	0.00578555	851.198	346.62	927.946	287.745	271.698	198.324
C05D9.4	WBGene00015473	-2.12757	0.245922	0.322199	30.3397	17.5846	34.9155	0	18.4649	0
C05D9.7	WBGene00015474	2.82584	3.46e-08	1.74e-07	107.875	40.5799	88.6316	649.747	621.212	402.158
C05D9.9	WBGene00015476	-1.53473	0.00772724	0.0159439	117.988	159.276	232.322	59.1734	38.2487	79.8806
C05E11.12	WBGene00197349	-1.65185	0.677424	NA	0	2.70533	0	0	0	0
C05E11.2	WBGene00015493	3.91339	0.328027	NA	0	0	0	4.64105	0	0
C05E11.3	WBGene00015494	5.06414	1.13e-19	2.08e-18	85.9626	72.7057	22.8294	1379.55	1754.16	3024.45
C05E11.6	WBGene00015495	1.67822	0.226833	0.301124	0	32.1258	75.2026	110.225	139.806	90.8986
C05E11.7	WBGene00015496	-7.15759	0.00754964	0.0156142	44.2454	0	83.26	0	0	0
C05E11.9	WBGene00195372	4.38958	0.269469	NA	0	0	0	0	3.95676	2.7545
C05E4.15	WBGene00206359	5.52354	0.160752	NA	0	0	0	0	14.5081	0
C05E4.7	WBGene00015489	4.89223	0.216124	NA	0	0	0	9.2821	0	0
C05E7.1	WBGene00007343	-2.47664	6.21e-07	2.62e-06	1902.13	701.018	2047.93	210.008	320.498	305.75
C05E7.2	WBGene00007344	-7.69709	1.41e-20	2.84e-19	2129.68	855.221	1471.82	0	15.827	5.50901
C05E7.3	WBGene00007345	3.14175	4.87e-10	3.09e-09	129.787	52.7539	72.5168	1033.79	668.693	550.901
C05E7.5	WBGene00200291	-2.94537	0.453986	NA	0	6.76332	0	0	0	0
C05G5.1	WBGene00007347	1.84251	0.000892347	0.00223299	106.189	155.556	56.4019	446.701	234.768	468.266
C05G5.2	WBGene00007348	1.00959	0.105252	0.158417	42.5599	118.358	124.89	193.764	125.297	256.169
C05G5.3	WBGene00007349	3.2036	3.99e-06	1.49e-05	80.4846	52.0775	12.0861	467.586	286.206	597.727
C05G5.5	WBGene00007351	3.98572	0.0168558	0.0321437	0	12.174	0	56.8529	39.5676	104.671
C05G5.7	WBGene00050939	-2.41782	0.0193523	0.0362391	28.6542	45.3142	57.7448	2.32053	11.8703	11.018
C05G5.9	WBGene00197186	3.23054	0.423525	NA	0	0	0	0	2.63784	0
C06A1.12	WBGene00219803	-3.17498	0.213825	0.286842	43.4027	25.3624	0	0	0	8.26351
C06A1.2	WBGene00007353	1.44368	0.000312566	0.000856422	230.076	145.073	287.381	574.33	660.779	559.164
C06A1.3	WBGene00007354	-6.35501	2.54e-09	1.47e-08	137.372	182.948	279.324	0	6.5946	0
C06A1.4	WBGene00014667	-4.19929	9.88e-07	4.06e-06	173.611	181.257	146.376	6.96158	18.4649	0
C06A1.6	WBGene00007356	-5.83567	0.0700987	0.112439	0	10.8213	40.2871	0	0	0
C06A1.7	WBGene00044235	-6.52689	0.0025492	0.00584678	62.365	12.8503	6.71452	0	0	0
C06A12.19	WBGene00255702	-6.5419	0.0255366	0.0463583	0	12.174	71.1739	0	0	0
C06A12.20	WBGene00255703	-5.29742	NA	NA	34.975	0	0	0	0	0
C06A12.3	WBGene00007357	-0.0622503	0.912957	0.933297	332.894	97.3918	288.724	225.091	204.433	258.923
C06A12.8	WBGene00007359	-4.87772	0.212665	0.285416	26.1259	0	0	0	0	0
C06A5.1	WBGene00015499	0.940418	0.0271001	0.0488895	109.56	107.199	80.5742	165.918	193.881	214.851
C06A5.12	WBGene00044414	-0.873533	0.770809	0.819977	0	22.6571	5.37161	15.0834	0	0
C06A5.2	WBGene00015500	-3.49141	0.147725	0.209001	0	55.7974	91.3174	0	0	13.7725
C06A5.3	WBGene00015501	1.66788	9.46e-05	0.000283171	273.479	365.557	645.936	1342.42	1160.65	1570.07
C06A5.6	WBGene00015504	-1.20606	0.0206997	0.038488	112.931	140.339	198.75	74.2568	67.2649	52.3356
C06A5.8	WBGene00015505	-3.38621	1.02e-05	3.6e-05	71.6355	99.4208	127.576	10.4424	5.27568	13.7725
C06A6.2	WBGene00015507	2.88505	2.5e-09	1.44e-08	32.4467	75.7491	76.5455	417.695	476.13	462.757
C06A6.4	WBGene00015509	-1.21026	0.0197545	0.0369484	757.65	921.502	965.547	460.624	528.887	148.743
C06A6.5	WBGene00015510	-2.8721	3.82e-10	2.45e-09	708.348	516.379	615.05	96.3018	106.833	44.0721
C06A6.7	WBGene00015511	0.645585	0.355396	0.43925	21.0693	40.2417	38.9442	60.3337	43.5244	52.3356
C06A8.3	WBGene00015514	-4.61769	1.5e-39	1.34e-37	20115.7	11563.2	17049.5	706.6	770.25	504.074
C06A8.6	WBGene00015516	-2.84191	0.0138806	0.0269985	221.227	260.05	9.40032	12.7629	7.91352	49.5811
C06A8.8	WBGene00015517	2.48021	1.74e-08	9.06e-08	120.095	128.165	268.581	864.396	979.958	1019.17
C06B3.16	WBGene00189947	-3.26313	0.406159	NA	0	8.45415	0	0	0	0
C06B3.6	WBGene00007365	0.457506	0.27589	0.354054	1110.35	1338.12	1177.73	2397.1	1643.37	933.777
C06B3.7	WBGene00007366	-0.716248	0.301054	0.381269	54.3587	71.6912	103.404	31.3271	71.2217	35.8086
C06B8.2	WBGene00007368	-2.96759	7.2e-08	3.46e-07	206.057	197.827	145.034	17.4039	26.3784	27.545
C06B8.3	WBGene00007369	4.89223	0.216124	NA	0	0	0	9.2821	0	0
C06B8.7	WBGene00007372	-0.702766	0.441278	0.526124	13.4843	100.773	100.718	33.6476	54.0757	44.0721
C06C3.10	WBGene00044169	-3.93287	0.0622251	0.101413	184.567	88.5994	0	17.4039	0	0
C06C3.11	WBGene00045404	-0.714189	0.711675	0.770258	30.3397	39.5654	0	18.5642	23.7406	0
C06C3.12	WBGene00175031	-0.586326	0.713798	0.772056	13.4843	20.6281	20.1435	0	27.6973	8.26351
C06C3.14	WBGene00206526	-2.92551	0.105391	0.158575	26.5473	31.1113	37.6013	0	0	13.7725
C06C3.3	WBGene00007374	-1.41843	0.154906	0.21737	112.51	62.5607	22.8294	30.1668	6.5946	38.5631
C06C3.4	WBGene00007375	-3.61064	0.0248424	0.0452306	100.711	57.15	260.523	0	0	35.8086
C06C3.5	WBGene00007376	5.23649	0.184391	NA	0	0	0	0	11.8703	0
C06C3.7	WBGene00007377	-0.287746	0.929596	0.946125	0	15.2175	0	5.80131	6.5946	0
C06C3.8	WBGene00007378	-3.79853	0.0461121	0.0782476	30.7611	8.45415	20.1435	0	3.95676	0
C06C3.9	WBGene00014668	3.23054	0.423525	NA	0	0	0	0	2.63784	0
C06C6.1	WBGene00007379	-1.65185	0.677424	NA	0	2.70533	0	0	0	0
C06C6.7	WBGene00007381	-6.1534	0.00349405	0.0077873	32.4467	12.174	18.8006	0	0	0
C06C6.8	WBGene00007382	-8.6295	7.13e-09	3.89e-08	53.9373	146.426	153.091	0	0	0
C06C6.9	WBGene00007383	-6.21728	0.00465147	0.0100781	28.2328	4.73432	33.5726	0	0	0
C06E1.1	WBGene00015518	-1.17839	0.154632	0.217003	36.6605	35.8456	48.3445	16.2437	25.0595	11.018
C06E1.11	WBGene00015526	-5.85365	0.0698916	0.112168	0	8.79231	42.9729	0	0	0
C06E1.7	WBGene00015522	-2.26969	0.54023	0.620472	0.421385	13.8648	0	0	2.63784	0
C06E1.9	WBGene00015524	-0.573431	0.289114	0.368218	190.887	180.242	177.263	175.2	129.254	60.5991
C06E2.1	WBGene00015527	0.653897	0.392551	0.477817	149.17	41.9326	42.9729	71.9363	182.011	115.689
C06E2.14	WBGene00198057	4.64816	0.240961	NA	0	0	0	0	0	8.26351
C06E2.2	WBGene00015528	6.10715	0.116687	0.172754	0	0	0	4.64105	17.146	0
C06E2.5	WBGene00015529	-2.46978	0.276817	0.355059	0	5.07249	64.4593	8.12184	3.95676	0
C06E4.1	WBGene00015530	5.05959	0.200225	NA	0	0	0	10.4424	0	0
C06E4.2	WBGene00015531	2.43975	0.0329636	0.0581917	75.4279	83.527	0	292.386	390.4	184.552
C06E4.20	WBGene00201532	4.08186	0.306404	NA	0	0	0	0	5.27568	0
C06E4.3	WBGene00015532	2.83725	0.162842	0.226745	0	8.11598	0	18.5642	17.146	24.7905
C06E4.6	WBGene00015535	2.76653	0.145102	0.205777	22.3334	0	0	91.6608	26.3784	35.8086
C06E4.8	WBGene00015537	-3.07684	0.213968	0.287011	29.9183	57.15	0	0	0	11.018
C06E7.2	WBGene00015539	1.7784	1.32e-05	4.55e-05	913.563	523.481	930.632	2172.01	2181.49	3768.16
C06E7.4	WBGene00015541	-4.29697	1.62e-12	1.39e-11	829.707	408.842	687.566	15.0834	26.3784	60.5991
C06E7.88	WBGene00189995	-4.41704	0.259404	0.336659	0	18.9373	0	0	0	0
C06E7.92	WBGene00200982	-3.14172	0.424066	NA	0	0	8.05742	0	0	0
C06E8.5	WBGene00015544	-4.2895	4.56e-07	1.96e-06	292.863	235.702	182.635	9.2821	25.0595	0
C06G1.1	WBGene00015545	-7.07434	9.53e-45	1.21e-42	2702.34	1301.6	2542.12	16.2437	19.7838	11.018
C06G1.10	WBGene00197189	0.357125	0.929898	NA	0	0	1.3429	0	0	0
C06G1.11	WBGene00197243	5.67349	0.149372	0.210439	0	0	0	0	0	16.527
C06G1.15	WBGene00199612	6.0777	0.121821	0.178662	0	0	0	0	10.5514	11.018
C06G1.2	WBGene00015546	-3.90572	3.52e-05	0.000112762	230.076	182.61	510.303	3.48079	48.8001	8.26351
C06G3.3	WBGene00015549	0.111593	0.869456	0.899002	48.0379	69.324	38.9442	34.8079	61.9893	74.3716
C06G3.4	WBGene00015550	8.52263	4.91e-06	1.81e-05	0	0	0	19.7245	23.7406	74.3716
C06G3.5	WBGene00015551	1.30102	0.000541562	0.00141608	891.229	1376.33	1363.05	3861.35	3003.18	2074.14
C06G3.6	WBGene00015552	2.24286	1.54e-09	9.21e-09	192.573	197.489	118.175	692.677	906.098	820.842
C06G3.8	WBGene00015554	-1.77991	0.00802613	0.016519	63.2078	156.233	208.15	44.09	46.1622	33.054
C06G4.1	WBGene00015557	-2.35623	0.0756689	0.119712	33.2894	90.9666	177.263	0	42.2055	16.527
C06G4.4	WBGene00015558	-4.8203	0.000897708	0.00224479	143.692	44.9761	147.719	0	0	13.7725
C06G4.6	WBGene00044446	-3.35251	0.000146456	0.000424133	136.107	59.5172	119.518	12.7629	2.63784	16.527
C06G8.3	WBGene00014669	-1.58471	0.00853887	0.0174706	315.196	245.17	506.274	71.9363	204.433	77.1261
C06H2.2	WBGene00007386	-2.45361	2.26e-05	7.47e-05	379.247	664.496	1431.53	102.103	168.822	181.797
C06H2.6	WBGene00007390	0.22879	0.584754	0.660457	292.02	230.291	171.892	222.77	325.773	267.187
C06H2.7	WBGene00007391	-1.75049	0.402447	0.487774	62.7864	18.5991	0	18.5642	0	5.50901
C06H5.6	WBGene00007394	-1.55721	0.00760868	0.015727	266.737	149.807	441.815	105.584	120.022	63.3536
C06H5.8	WBGene00044795	1.52271	0.0216681	0.0400952	34.975	54.4447	30.8868	165.918	60.6703	121.198
C07A12.11	WBGene00197482	-1.81686	0.646729	NA	0	3.04349	0	0	0	0
C07A12.18	WBGene00206364	-7.00616	0.00720773	0.0149714	87.6481	26.7151	0	0	0	0
C07A12.2	WBGene00015560	2.23997	1.01e-08	5.39e-08	69.9499	88.9376	116.833	447.861	390.4	454.493
C07A12.7	WBGene00015561	2.09722	6.02e-11	4.25e-10	429.813	454.495	545.219	1879.63	1661.84	2572.71
C07A4.2	WBGene00007397	2.32473	0.048118	0.0813013	29.9183	48.3577	0	83.5389	121.341	192.815
C07A4.3	WBGene00007398	-6.91904	3.28e-09	1.87e-08	95.6544	227.924	193.378	3.48079	0	0
C07A4.4	WBGene00196157	4.87766	0.217551	NA	0	0	0	0	9.23244	0
C07A9.12	WBGene00043994	0.836117	0.391372	0.476615	32.4467	33.8166	59.0877	104.424	108.151	8.26351
C07A9.13	WBGene00044227	-5.58898	0.094282	0.144493	0	12.174	30.8868	0	0	0
C07A9.15	WBGene00199493	-2.26679	0.565977	NA	4.21385	0	0	0	0	0
C07A9.16	WBGene00200150	3.67989	0.359553	NA	0	0	0	0	3.95676	0
C07A9.2	WBGene00007400	-0.63426	0.252267	0.328774	199.315	231.644	236.351	91.6608	97.6001	245.151
C07A9.9	WBGene00007405	1.75213	0.000483509	0.00127524	206.479	312.127	291.41	1186.95	412.822	1129.35
C07B5.3	WBGene00007408	4.1101	4.36e-07	1.88e-06	19.8051	40.2417	85.9458	1810.01	270.379	413.176
C07B5.4	WBGene00007409	-0.22611	0.622038	0.69349	270.529	198.165	230.979	203.046	265.103	126.707
C07B5.6	WBGene00007410	1.5543	0.601266	0.675325	0	10.8213	0	0	13.1892	19.2815
C07B5.8	WBGene00195209	-2.03267	0.00488169	0.010523	111.667	78.1163	190.692	16.2437	29.0162	49.5811
C07C7.1	WBGene00007411	5.10509	0.000484263	0.00127703	24.0189	0	0	241.335	360.065	242.396
C07C7.3	WBGene00235302	-4.53942	0.246342	0.322515	20.6479	0	0	0	0	0
C07D10.1	WBGene00015566	-2.70411	0.323862	0.406151	0	45.3142	9.40032	8.12184	0	0
C07D10.5	WBGene00015569	2.16107	0.00113739	0.00279615	24.8617	90.2903	51.0303	167.078	205.752	374.613
C07D8.2	WBGene00015562	0.58206	0.886334	NA	0	0.338166	0	0	0	0
C07D8.6	WBGene00015565	-0.447645	0.147191	0.208341	1448.3	1543.73	1716.23	1115.01	1423.12	908.986
C07E3.10	WBGene00007420	-4.86482	8.89e-05	0.000267057	182.46	129.179	213.522	0	17.146	0
C07E3.3	WBGene00007414	-0.256651	0.715498	0.773339	580.669	648.602	259.18	727.485	411.503	104.671
C07E3.4	WBGene00007415	-7.2407	4.86e-18	7.52e-17	468.58	624.592	970.919	0	10.5514	2.7545
C07E3.8	WBGene00007418	-1.43035	0.54779	0.627286	28.2328	2.70533	0	4.64105	6.5946	0
C07E3.9	WBGene00007419	-2.50443	0.00140545	0.00338935	122.202	119.034	205.464	42.9297	27.6973	5.50901
C07F11.2	WBGene00015570	3.08703	2.71e-05	8.85e-05	43.4027	10.8213	10.7432	183.322	195.2	181.797
C07G1.10	WBGene00197541	-1.46535	0.712706	NA	0	2.36716	0	0	0	0
C07G1.6	WBGene00015572	-6.92114	0.000107386	0.000318811	40.0316	42.2707	25.5152	0	0	0
C07G1.7	WBGene00015573	-5.58604	0.0985129	0.149812	0	6.76332	36.2584	0	0	0
C07G3.10	WBGene00015578	7.60826	0.00033722	0.000916875	0	0	0	15.0834	30.3352	16.527
C07G3.8	WBGene00015576	2.13743	0.581642	NA	0	1.69083	0	0	7.91352	0
C07H4.1	WBGene00007421	-1.69471	0.00292797	0.00663652	207.321	169.083	201.435	30.1668	83.092	66.1081
C07H6.4	WBGene00015581	-2.77319	1.05e-09	6.38e-09	1891.18	2554.17	4794.16	416.534	356.109	581.2
C07H6.9	WBGene00015582	-5.84534	0.0564456	0.0932907	20.6479	30.4349	0	0	0	0
C08A9.10	WBGene00044773	-3.74579	0.0100568	0.0202467	58.9939	127.489	106.089	0	21.1027	0
C08A9.11	WBGene00045273	-6.54634	0.0170012	0.0323854	30.3397	52.7539	0	0	0	0
C08A9.6	WBGene00015586	2.76356	0.0595141	0.0975903	0	22.9953	8.05742	25.5258	58.0325	129.462
C08A9.8	WBGene00015588	5.23649	0.184391	NA	0	0	0	0	11.8703	0
C08A9.9	WBGene00015589	4.22725	0.288543	NA	0	0	0	5.80131	0	0
C08B11.8	WBGene00007435	-2.79346	0.00023682	0.000661846	140.321	171.45	126.233	9.2821	13.1892	44.0721
C08B11.9	WBGene00007436	-1.4721	0.0126255	0.0247824	179.51	218.793	88.6316	66.135	64.6271	44.0721
C08B6.10	WBGene00007430	-3.1807	5.12e-09	2.83e-08	270.951	191.74	315.582	31.3271	35.6109	16.527
C08B6.11	WBGene00007431	-1.39918	0.432611	0.517927	0	52.4157	41.63	3.48079	23.7406	8.26351
C08B6.14	WBGene00044044	3.54936	0.377475	NA	0	0	0	3.48079	0	0
C08B6.15	WBGene00077449	-1.81686	0.646729	NA	0	3.04349	0	0	0	0
C08B6.2	WBGene00007423	-1.20615	0.618451	0.690289	0	3.04349	42.9729	2.32053	17.146	0
C08B6.3	WBGene00007424	-2.17068	0.00189001	0.0044454	134.422	242.465	151.748	13.9232	52.7568	52.3356
C08B6.4	WBGene00007425	3.9165	3.03e-10	1.97e-09	51.8304	20.6281	44.3158	254.098	597.471	906.232
C08B6.5	WBGene00007426	7.40702	0.012043	0.0237573	0	0	0	22.045	31.6541	0
C08B6.8	WBGene00007429	-0.00855418	0.984679	0.988292	251.567	190.387	145.034	156.635	196.519	234.133
C08D8.1	WBGene00015592	-0.303494	0.893033	0.917834	0	9.13048	37.6013	0	13.1892	24.7905
C08D8.7	WBGene00235325	3.71814	1.07e-10	7.31e-10	30.7611	21.9808	29.5439	163.597	486.682	429.703
C08E3.1	WBGene00015593	5.05609	0.0139595	0.0271336	0	8.79231	0	119.507	183.33	0
C08E3.13	WBGene00015605	4.08388	1.13e-06	4.61e-06	28.6542	55.7974	20.1435	761.132	946.985	77.1261
C08E8.1	WBGene00007437	2.15441	0.576996	NA	0	2.029	0	9.2821	0	0
C08E8.10	WBGene00077692	-7.79598	1.34e-08	7.09e-08	135.265	108.551	142.348	0	1.31892	0
C08E8.3	WBGene00007439	-6.31031	0.0346347	0.0607999	0	17.2465	53.7161	0	0	0
C08E8.4	WBGene00007440	0.487371	0.372554	0.45736	146.642	277.634	162.491	142.712	346.876	336.049
C08E8.6	WBGene00007442	4.87766	0.217551	NA	0	0	0	0	9.23244	0
C08E8.9	WBGene00050891	0.728304	0.82957	0.868529	0	0	10.7432	0	9.23244	8.26351
C08F1.11	WBGene00044417	4.03858	0.311864	NA	0	0	0	0	0	5.50901
C08F1.13	WBGene00269390	3.51442	0.382364	NA	0	0	0	1.16026	0	2.7545
C08F1.8	WBGene00015611	7.87309	5.5e-16	6.87e-15	0	4.73432	0	469.906	457.665	399.403
C08F11.1	WBGene00007450	-1.70925	0.203295	0.274713	11.7988	39.2272	47.0016	10.4424	18.4649	0
C08F11.10	WBGene00007457	-6.07572	1.28e-06	5.16e-06	167.29	97.3918	141.005	0	0	8.26351
C08F11.11	WBGene00007458	-8.79275	4.44e-40	4.07e-38	4114.83	3099.29	3261.91	15.0834	0	8.26351
C08F11.116	WBGene00194668	-4.16579	0.287715	NA	0	15.8938	0	0	0	0
C08F11.12	WBGene00007459	-6.96919	0.00213745	0.00497011	91.4406	18.5991	1.3429	0	0	0
C08F11.13	WBGene00007460	0.381398	0.378587	0.463715	434.448	802.806	457.93	987.384	663.417	556.41
C08F11.14	WBGene00007461	-4.89283	NA	NA	0	26.3769	0	0	0	0
C08F11.3	WBGene00007452	-0.36142	0.786939	0.834118	31.6039	20.9663	26.8581	18.5642	42.2055	0
C08F11.6	WBGene00014672	3.23054	0.423525	NA	0	0	0	0	2.63784	0
C08F11.7	WBGene00007454	-2.63187	0.490706	0.574046	0	0	33.5726	0	5.27568	0
C08F8.15	WBGene00219217	5.06822	0.199429	NA	0	0	0	0	10.5514	0
C08F8.16	WBGene00219442	6.88897	0.0393026	0.0680303	0	0	0	0	15.827	22.036
C08F8.2	WBGene00007444	-1.08372	0.0264509	0.0478078	152.963	162.658	256.494	90.5005	72.5406	107.426
C08F8.3	WBGene00007445	-2.79806	0.0325238	0.0575077	53.9373	72.0293	135.633	2.32053	34.2919	0
C08F8.6	WBGene00007448	-5.09801	1.5e-06	5.99e-06	688.543	915.077	1462.42	15.0834	0	77.1261
C08F8.9	WBGene00007449	-1.90831	4.95e-08	2.44e-07	436.976	583.674	480.759	127.629	127.935	145.989
C08G5.1	WBGene00015614	5.34527	0.17514	NA	0	0	0	12.7629	0	0
C08G5.3	WBGene00015616	-3.57702	0.0872691	0.135408	0	22.9953	119.518	0	6.5946	5.50901
C08G5.6	WBGene00015618	1.4153	0.380742	0.465768	0	9.80681	111.461	190.283	110.789	19.2815
C08G5.7	WBGene00044418	3.94911	5.32e-43	5.95e-41	201.843	161.643	153.091	2344.89	2833.04	2826.12
C08G5.9	WBGene00201381	4.39859	0.268437	NA	0	0	0	0	6.5946	0
C08G9.1	WBGene00015619	2.87251	2.2e-16	2.86e-15	294.127	497.104	562.676	3399.57	3145.63	3352.23
C08G9.2	WBGene00015620	-0.202403	0.949953	0.961652	0.84277	15.8938	0	0	14.5081	0
C08H9.1	WBGene00007462	-0.142381	0.924342	0.941787	4.21385	35.5074	71.1739	37.1284	61.9893	0
C08H9.15	WBGene00007474	-3.16099	6.17e-08	3e-07	243.561	216.426	185.321	19.7245	36.9298	13.7725
C08H9.16	WBGene00086566	-2.34986	0.0085593	0.0175041	55.2014	158.6	249.78	56.8529	23.7406	8.26351
C08H9.2	WBGene00007463	-2.85223	3.51e-21	7.54e-20	8251.56	9415.89	7800.92	1352.87	1295.18	873.178
C08H9.3	WBGene00007464	-3.75914	8.24e-07	3.43e-06	275.586	140.677	136.976	16.2437	19.7838	2.7545
C09B7.2	WBGene00015621	-0.325148	0.434485	0.519704	171.504	161.305	136.976	135.751	110.789	129.462
C09B8.3	WBGene00015622	-7.41771	0.000112646	0.000333232	58.1511	6.08699	88.6316	0	0	0
C09B8.4	WBGene00015623	-3.45762	8.55e-08	4.07e-07	260.837	268.842	163.834	12.7629	35.6109	13.7725
C09B8.5	WBGene00015624	6.67486	0.0520552	0.0871388	0	0	0	24.3655	7.91352	0
C09B8.8	WBGene00015625	-6.9092	0.00012136	0.000356878	26.1259	48.6959	32.2297	0	0	0
C09B9.1	WBGene00015626	2.96666	6.38e-08	3.09e-07	29.9183	18.5991	34.9155	290.066	164.865	187.306
C09B9.2	WBGene00015627	-9.25494	5.22e-10	3.3e-09	309.718	172.126	61.7735	0	0	0
C09B9.4	WBGene00015629	-3.92072	7.29e-05	0.000222142	29.9183	89.2758	136.976	3.48079	7.91352	5.50901
C09B9.7	WBGene00015630	-3.85515	0.128591	0.186822	29.9183	30.0968	0	0	3.95676	0
C09B9.85	WBGene00220250	-6.8924	0.0117709	0.0232973	0	42.9471	63.1164	0	0	0
C09D4.1	WBGene00015632	2.80227	1.9e-12	1.61e-11	195.944	158.6	206.807	1082.53	1867.59	955.813
C09D4.2	WBGene00015633	-1.80793	0.00201117	0.00470588	391.888	240.098	267.238	134.59	80.4541	38.5631
C09D4.3	WBGene00015634	-7.26035	3.81e-07	1.66e-06	80.0632	100.097	85.9458	0	1.31892	0
C09D4.4	WBGene00015635	-0.705036	0.158438	0.221591	294.548	146.426	185.321	100.943	154.314	129.462
C09D4.8	WBGene00199116	5.51584	0.158848	0.222039	0	0.338166	0	0	0	27.545
C09D4.9	WBGene00206357	-7.41355	9.91e-06	3.49e-05	62.365	28.0678	61.7735	0	0	0
C09E7.10	WBGene00044295	7.85689	6.04e-15	6.81e-14	0	2.36716	0	175.2	300.714	225.869
C09E7.4	WBGene00015638	1.4282	0.16089	0.224441	17.6982	89.9521	16.1148	32.4874	79.1352	225.869
C09E7.5	WBGene00015639	-2.62851	0.504683	NA	0	5.41065	0	0	0	0
C09E7.6	WBGene00015640	2.66667	0.142614	0.202879	0	39.2272	0	41.7695	64.6271	145.989
C09E7.7	WBGene00015641	-0.0148615	0.9856	0.988907	27.8114	71.0148	170.549	49.8913	92.3244	123.953
C09E7.8	WBGene00015642	-0.960767	0.458278	0.543182	54.7801	25.3624	38.9442	44.09	15.827	0
C09E8.1	WBGene00015644	0.219546	0.545917	0.625636	443.297	390.582	512.989	681.074	436.563	446.23
C09E9.1	WBGene00007476	1.784	1.3e-05	4.5e-05	203.95	153.527	315.582	806.383	650.228	851.142
C09F12.2	WBGene00007482	-0.409985	0.852875	0.886348	19.3837	18.5991	0	4.64105	0	24.7905
C09F12.3	WBGene00007483	0.909408	0.251546	0.328032	61.9436	25.7006	21.4864	95.1416	71.2217	38.5631
C09F5.1	WBGene00015647	0.28966	0.618155	0.690048	200.158	86.2323	80.5742	121.828	150.357	179.043
C09F5.3	WBGene00015649	6.48439	1.64e-06	6.5e-06	0	1.69083	0	61.4939	50.119	77.1261
C09F9.1	WBGene00007478	-7.30263	1.75e-05	5.9e-05	29.0756	65.9423	45.6587	0	0	0
C09F9.2	WBGene00007479	-8.73279	6.02e-11	4.25e-10	332.894	166.716	239.037	0	1.31892	0
C09F9.7	WBGene00045322	-3.5105	0.0414367	0.0712739	76.2707	21.9808	14.7719	9.2821	0	0
C09G1.2	WBGene00007484	6.07264	2.3e-06	8.87e-06	0	4.73432	0	82.3787	163.546	115.689
C09G1.3	WBGene00007485	8.04703	0.000168433	0.000483179	0	0	0	5.80131	18.4649	60.5991
C09G1.4	WBGene00007486	4.40882	1.22e-33	7.1e-32	93.5475	135.266	75.2026	2608.27	1900.56	2002.52
C09G1.5	WBGene00007487	2.68871	3.09e-14	3.22e-13	172.768	177.537	182.635	1222.92	801.904	1413.06
C09G1.7	WBGene00284856	3.79321	0.190059	0.25964	0	2.36716	0	10.4424	0	24.7905
C09G4.4	WBGene00044001	-2.23964	0.000978841	0.00243189	160.548	90.2903	196.064	49.8913	21.1027	22.036
C09G5.12	WBGene00202129	3.67989	0.359553	NA	0	0	0	0	3.95676	0
C09G5.13	WBGene00206538	4.43652	0.000155489	0.000448419	56.0442	3.71982	0	407.252	507.784	396.649
C09G5.7	WBGene00007489	-2.20604	0.381699	0.466637	23.5976	44.2997	0	0	14.5081	0
C09G9.1	WBGene00007492	0.111629	0.809393	0.852137	653.568	670.583	271.266	682.235	539.438	504.074
C09G9.3	WBGene00007494	-5.60259	0.0814308	0.12758	13.0629	30.0968	0	0	0	0
C09G9.5	WBGene00007495	1.02228	0.471695	0.555893	29.0756	16.5701	0	17.4039	35.6109	41.3176
C09H10.10	WBGene00007504	-0.370039	0.613505	0.685962	39.6102	48.3577	34.9155	30.1668	42.2055	22.036
C09H10.4	WBGene00043120	-0.764613	0.815975	0.857557	20.2265	0	0	10.4424	1.31892	0
C09H10.5	WBGene00007499	-0.0377003	0.936065	0.951425	233.447	205.267	127.576	216.969	196.519	137.725
C09H10.9	WBGene00007503	-1.2096	0.214141	0.287222	32.868	38.2127	18.8006	8.12184	19.7838	11.018
C09H5.7	WBGene00015661	-7.16097	0.00681355	0.0142413	0	61.8843	65.8022	0	0	0
C10A4.10	WBGene00050957	-3.79146	0.000616384	0.00159489	249.039	146.088	77.8884	0	18.4649	16.527
C10A4.13	WBGene00206485	-2.61662	0.217723	0.29099	7.58493	6.76332	24.1723	5.80131	0	0
C10A4.2	WBGene00015663	0.283052	0.94109	NA	0	5.41065	0	0	6.5946	0
C10A4.3	WBGene00015664	4.80801	0.00153275	0.0036769	0	8.45415	0	47.5708	94.9623	110.18
C10A4.4	WBGene00015665	-1.88558	0.360204	0.444273	0	67.6332	71.1739	0	7.91352	30.2995
C10A4.6	WBGene00015667	-0.63021	0.825399	0.865108	0	6.42515	30.8868	0	23.7406	0
C10A4.9	WBGene00045456	-8.90555	5.9e-10	3.7e-09	164.34	187.006	75.2026	0	0	0
C10B5.1	WBGene00015670	-0.488659	0.861174	0.892878	0	49.3722	0	8.12184	0	27.545
C10B5.3	WBGene00015671	-0.576201	0.253698	0.33039	656.518	321.934	582.82	476.868	373.254	192.815
C10C5.1	WBGene00007505	-0.206094	0.471055	0.555214	885.33	718.941	723.825	732.126	627.806	658.326
C10C5.2	WBGene00007506	-4.21036	0.00019656	0.000557686	140.743	155.556	51.0303	0	6.5946	13.7725
C10C5.3	WBGene00007507	-4.70563	2.83e-12	2.36e-11	463.102	354.06	428.386	6.96158	9.23244	35.8086
C10C5.4	WBGene00007508	-5.86101	2.56e-17	3.65e-16	286.542	344.929	279.324	6.96158	6.5946	0
C10C5.5	WBGene00007509	-4.01743	0.00178139	0.00421219	144.114	33.1403	64.4593	11.6026	0	2.7545
C10C5.7	WBGene00007511	4.15569	7.43e-21	1.53e-19	101.132	71.6912	42.9729	1635.97	1272.76	977.849
C10C6.11	WBGene00200561	-0.0590556	0.988324	NA	0	0.676332	0	0	0	0
C10C6.3	WBGene00007512	-5.26551	5.4e-05	0.00016796	61.5222	61.5462	100.718	0	5.27568	0
C10C6.7	WBGene00007515	3.91017	0.000107612	0.000319375	26.5473	26.3769	0	194.924	431.287	187.306
C10C6.9	WBGene00045175	-1.7677	0.0730744	0.116372	73.7424	79.469	32.2297	27.8463	22.4216	2.7545
C10E2.1	WBGene00015672	0.889878	0.337666	0.420749	24.4403	16.232	24.1723	75.4171	21.1027	22.036
C10E2.2	WBGene00015673	1.92637	0.0031881	0.00717085	71.6355	20.9663	33.5726	138.071	172.779	170.779
C10E2.4	WBGene00015674	6.00872	1.28e-17	1.91e-16	5.89939	10.145	0	365.483	353.471	437.966
C10E2.5	WBGene00015675	8.74398	7.83e-16	9.65e-15	1.26416	0	0	293.547	163.546	187.306
C10F3.7	WBGene00015679	6.78983	0.00737877	0.0152972	0	0	0	6.96158	11.8703	16.527
C10G11.1	WBGene00015685	-5.7234	0.0778811	0.122697	0	22.9953	24.1723	0	0	0
C10G11.10	WBGene00015690	-6.29647	0.00385616	0.00851989	9.69186	9.80681	51.0303	0	0	0
C10G11.6	WBGene00015686	1.56811	0.205178	0.276892	59.8367	86.2323	0	119.507	88.3677	228.624
C10G11.7	WBGene00015687	1.15053	0.000114166	0.000337038	3215.17	2407.06	2413.2	6285.14	4804.83	6754.04
C10G11.8	WBGene00015688	-8.88699	2.17e-21	4.8e-20	620.279	739.569	766.798	1.16026	2.63784	0
C10G11.9	WBGene00015689	-10.1528	2.74e-15	3.2e-14	361.127	349.663	303.496	0	0	0
C10G8.3	WBGene00015682	-3.41344	0.0558297	0.0924578	137.793	13.5266	40.2871	0	0	19.2815
C10G8.4	WBGene00015683	-4.64887	0.00159411	0.00381093	46.7737	152.175	100.718	0	0	13.7725
C10G8.8	WBGene00015684	-4.32825	1.13e-18	1.87e-17	1766.02	2145.66	2865.76	105.584	175.416	52.3356
C10H11.12	WBGene00196219	3.23054	0.423525	NA	0	0	0	0	2.63784	0
C10H11.7	WBGene00015696	-6.67414	0.013682	0.0266361	26.5473	64.2515	0	0	0	0
C10H11.8	WBGene00015697	1.23992	0.0735149	0.116944	69.5285	108.551	29.5439	141.552	249.276	101.917
C11D2.3	WBGene00015701	1.69249	0.164954	0.229372	56.0442	41.2562	0	71.9363	110.789	134.971
C11D2.4	WBGene00015702	-0.554751	0.258835	0.336121	154.648	251.934	287.381	167.078	108.151	198.324
C11D2.7	WBGene00015703	-0.476847	0.12512	0.182744	412.536	432.176	494.188	345.758	298.076	316.768
C11D2.99	WBGene00196792	-2.22159	0.573876	NA	0	4.05799	0	0	0	0
C11E4.16	WBGene00202134	3.10809	0.442051	NA	0	0	0	2.32053	0	0
C11E4.6	WBGene00007520	3.18697	9.43e-14	9.36e-13	72.8996	68.3095	145.034	829.588	908.736	834.615
C11E4.7	WBGene00007521	-1.66831	NA	NA	0	33.8166	0	0	10.5514	0
C11E4.8	WBGene00007522	6.43923	6.13e-08	2.98e-07	0	5.74882	0	165.918	172.779	225.869
C11G10.1	WBGene00007525	-3.16093	2.94e-05	9.54e-05	184.567	144.397	55.059	15.0834	11.8703	16.527
C11G6.2	WBGene00007523	-0.195794	0.960223	NA	0	3.04349	0	2.32053	0	0
C11H1.2	WBGene00007528	0.7534	0.411361	0.496737	72.0568	73.382	8.05742	49.8913	96.2812	115.689
C11H1.3	WBGene00007529	-1.14649	0.00566884	0.0120698	361.127	302.997	257.837	107.904	138.487	173.534
C11H1.5	WBGene00007530	-4.33133	0.00404403	0.00889337	158.862	85.556	52.3732	0	0	16.527
C11H1.7	WBGene00007531	0.773603	0.30172	0.381862	92.7047	42.2707	26.8581	122.988	101.557	52.3356
C11H1.9	WBGene00023500	-3.46611	1.19e-08	6.28e-08	434.869	168.068	284.695	27.8463	34.2919	16.527
C12C8.6	WBGene00198071	-3.01477	0.443276	NA	0	7.10148	0	0	0	0
C12D12.1	WBGene00015713	-1.46217	0.00751311	0.0155443	1206.85	1062.86	793.656	305.149	640.995	162.516
C12D12.3	WBGene00015714	0.521437	0.758484	0.809597	0	15.8938	38.9442	6.96158	40.8865	30.2995
C12D5.10	WBGene00015711	5.7233	0.145735	0.206557	0	0	0	3.48079	13.1892	0
C12D5.3	WBGene00015706	1.53278	0.0791719	0.124538	29.497	22.6571	57.7448	213.488	39.5676	60.5991
C12D5.4	WBGene00015707	8.21186	1.51e-05	5.15e-05	0	0	0	44.09	17.146	33.054
C12D5.5	WBGene00015708	5.67766	4.3e-05	0.000136033	0	5.74882	0	175.2	85.7298	63.3536
C12D5.9	WBGene00015710	-2.4847	0.00140485	0.00338837	131.894	52.7539	161.148	24.3655	10.5514	27.545
C12D8.1	WBGene00007534	2.0591	1.49e-14	1.61e-13	1035.76	882.951	890.345	4173.47	3293.34	4244.69
C12D8.13	WBGene00007540	5.96342	0.129164	0.187278	0	0	0	11.6026	0	8.26351
C12D8.15	WBGene00007542	9.32323	1.09e-08	5.79e-08	0	0	0	29.0066	84.4109	90.8986
C12D8.2	WBGene00014674	1.78466	0.640285	NA	0	3.38166	0	0	11.8703	0
C12D8.21	WBGene00195157	3.79246	0.027148	0.0489658	0	9.46864	0	49.8913	43.5244	44.0721
C12D8.23	WBGene00198293	-1.25079	0.753954	NA	0	2.029	0	0	0	0
C12D8.25	WBGene00201770	4.08186	0.306404	NA	0	0	0	0	5.27568	0
C12D8.3	WBGene00014675	2.44881	0.548421	NA	0	0	0	0	0	2.7545
C12D8.9	WBGene00007538	-2.13293	0.474247	0.558332	0	12.8503	21.4864	0	0	8.26351
C13A10.1	WBGene00015728	1.18076	0.309997	0.390911	31.6039	39.9036	1.3429	63.8145	77.8163	24.7905
C13A10.2	WBGene00015729	2.29834	0.000280579	0.000774035	606.373	285.412	88.6316	1604.64	1398.06	1831.75
C13A2.1	WBGene00015718	-4.4119	0.259964	0.337284	1.68554	0	17.4577	0	0	0
C13A2.12	WBGene00044547	1.58978	0.495939	0.578918	0	2.70533	13.429	41.7695	5.27568	0
C13A2.3	WBGene00015720	8.59304	4.09e-06	1.53e-05	0	0	0	26.686	17.146	79.8806
C13A2.5	WBGene00015722	2.44881	0.548421	NA	0	0	0	1.16026	0	0
C13B4.1	WBGene00007545	-1.4081	0.00164526	0.00391594	419.7	402.417	515.675	140.392	117.384	250.66
C13B9.2	WBGene00015733	-0.571391	0.771623	0.820494	67.843	12.5121	0	31.3271	22.4216	0
C13C12.2	WBGene00007552	-5.74206	0.00638468	0.0134258	160.548	65.266	0	0	3.95676	0
C13C4.4	WBGene00007548	2.78946	1.74e-06	6.89e-06	45.931	64.9278	17.4577	323.713	319.179	258.923
C13C4.6	WBGene00007550	-0.553427	0.533913	0.614953	58.5725	26.0388	36.2584	13.9232	46.1622	22.036
C13C4.7	WBGene00007551	-1.14915	0.424172	0.509688	131.894	57.15	0	19.7245	38.2487	27.545
C13C4.9	WBGene00197001	-1.46535	0.712706	NA	0	2.36716	0	0	0	0
C13E3.1	WBGene00015740	1.84187	0.00937331	0.0190119	28.6542	74.0583	173.234	276.143	249.276	457.248
C13F10.1	WBGene00015741	0.0607516	0.961872	0.971281	2.52831	69.324	33.5726	74.2568	15.827	19.2815
C13F10.2	WBGene00015742	1.10591	0.17397	0.240674	26.5473	77.44	247.094	160.116	255.871	336.049
C13F10.5	WBGene00015744	-1.19404	0.00177975	0.00421003	535.58	359.47	451.215	212.328	218.941	154.252
C13F10.6	WBGene00015745	1.07569	0.0329782	0.0582103	89.755	118.358	77.8884	143.873	178.054	286.468
C13F10.7	WBGene00015746	-3.04776	2.28e-14	2.42e-13	1864.21	2553.49	3600.32	257.578	288.844	426.948
C13G3.1	WBGene00007553	4.23918	7.5e-20	1.4e-18	93.5475	81.8361	59.0877	906.165	1272.76	2280.73
C13G5.2	WBGene00015747	-0.283289	0.5677	0.644852	125.573	91.3048	107.432	89.3402	71.2217	107.426
C14A11.11	WBGene00198449	2.44881	0.548421	NA	0	0	0	1.16026	0	0
C14A11.2	WBGene00015748	12.0746	9.97e-21	2.03e-19	0	0	0	422.336	345.557	605.991
C14A11.5	WBGene00015750	4.42364	0.000183255	0.000522416	1.68554	24.6861	0	156.635	201.795	228.624
C14A11.6	WBGene00015751	1.56842	0.033326	0.0587704	23.1762	83.527	37.6013	81.2184	135.849	214.851
C14A11.9	WBGene00050944	2.60791	2.51e-10	1.65e-09	82.5915	91.3048	146.376	669.472	510.422	757.489
C14A4.12	WBGene00007562	1.2839	0.0491433	0.0829045	92.2833	102.464	124.89	91.6608	237.406	451.739
C14A4.13	WBGene00007563	-6.39256	7.05e-05	0.000215316	31.6039	42.2707	72.5168	0	1.31892	0
C14A4.3	WBGene00007556	-0.0937273	0.821811	0.862489	599.21	322.61	365.27	332.995	391.719	484.793
C14A4.6	WBGene00007557	-0.177979	0.760994	0.811728	172.768	151.498	71.1739	91.6608	159.589	99.1621
C14A4.7	WBGene00007558	-2.0632	0.0176165	0.0334399	275.586	128.503	136.976	44.09	77.8163	5.50901
C14A4.8	WBGene00007559	-7.1728	3.03e-05	9.81e-05	59.4153	34.1547	34.9155	0	0	0
C14A4.9	WBGene00007560	-6.24007	1.41e-13	1.37e-12	273.9	350.002	277.981	3.48079	0	11.018
C14A6.13	WBGene00050956	-8.4671	2.94e-09	1.68e-08	97.7613	99.7589	118.175	0	0	0
C14A6.16	WBGene00206536	0.0517498	0.989385	NA	0	3.71982	0	1.16026	2.63784	0
C14A6.5	WBGene00007569	-2.87244	0.465394	NA	0	6.42515	0	0	0	0
C14A6.6	WBGene00007570	-7.84238	1.38e-06	5.55e-06	32.868	62.2225	110.118	0	0	0
C14A6.7	WBGene00007571	-3.93476	0.315534	NA	0	13.5266	0	0	0	0
C14A6.8	WBGene00007572	-1.03352	0.796042	NA	0	1.69083	0	0	0	0
C14B1.12	WBGene00184990	-3.68644	0.00201614	0.00471646	183.724	83.8651	24.1723	5.80131	15.827	0
C14B1.2	WBGene00007573	-5.74463	1.16e-11	8.96e-11	493.863	255.315	179.949	4.64105	1.31892	13.7725
C14B1.3	WBGene00007574	0.28914	0.574554	0.651141	130.629	328.359	221.579	218.129	365.341	247.905
C14B1.7	WBGene00007578	-1.88551	0.0227188	0.0418341	28.6542	149.469	131.604	23.2053	32.973	27.545
C14B1.8	WBGene00007579	-0.366722	0.467167	0.551691	146.221	111.257	146.376	78.8979	91.0055	145.989
C14B1.9	WBGene00007580	-4.13074	2.56e-10	1.68e-09	259.573	228.6	116.833	11.6026	11.8703	11.018
C14B4.2	WBGene00007583	2.29052	8.84e-05	0.000265744	131.472	71.0148	64.4593	288.905	730.682	289.223
C14B9.10	WBGene00015755	-1.55988	1.14e-08	6.06e-08	3921.83	4855.39	4428.89	1574.48	1655.25	1245.04
C14B9.2	WBGene00015752	-2.49836	1.63e-05	5.51e-05	1118.36	826.139	997.777	281.944	179.373	55.0901
C14B9.3	WBGene00015753	-8.53884	2.55e-10	1.67e-09	293.705	211.354	139.662	0	1.31892	0
C14B9.8	WBGene00015754	2.38369	8.09e-09	4.38e-08	155.912	202.561	110.118	686.876	700.347	1074.26
C14C10.1	WBGene00007584	-5.65226	3.71e-16	4.72e-15	428.127	382.466	319.611	9.2821	1.31892	13.7725
C14C10.2	WBGene00007585	-1.27737	0.184053	0.252574	26.5473	109.228	33.5726	38.2887	17.146	13.7725
C14C10.4	WBGene00007587	0.178602	0.642118	0.710937	356.492	233.334	400.185	330.675	381.168	407.667
C14C10.5	WBGene00007588	0.788789	0.0405436	0.0698925	372.504	514.35	602.963	742.568	695.071	1137.61
C14C11.1	WBGene00015765	-7.84187	4.11e-07	1.78e-06	76.6921	77.7781	49.6874	0	0	0
C14C11.2	WBGene00015766	-4.1716	5.85e-05	0.000180749	96.9186	70.3385	72.5168	9.2821	2.63784	0
C14C11.4	WBGene00015768	1.21566	0.281646	0.359843	28.2328	39.9036	1.3429	74.2568	36.9298	52.3356
C14C11.7	WBGene00015769	-3.84463	0.00632072	0.013309	153.806	159.952	114.147	0	29.0162	0
C14C6.12	WBGene00015763	-5.33834	0.172369	0.238706	0	0	36.2584	0	0	0
C14C6.13	WBGene00015764	-5.49111	0.160358	0.223879	0	0	40.2871	0	0	0
C14C6.2	WBGene00015756	-0.208525	0.658873	0.724589	276.007	236.378	233.665	251.777	271.698	118.444
C14C6.3	WBGene00015757	-4.65221	0.23472	0.30991	22.3334	0	0	0	0	0
C14C6.5	WBGene00015759	-0.137306	0.740267	0.795046	907.663	869.086	880.944	628.862	1227.91	556.41
C14E2.1	WBGene00015770	2.3802	0.229995	0.304638	18.1196	0	0	23.2053	39.5676	33.054
C14E2.11	WBGene00206378	4.03858	0.311864	NA	0	0	0	0	0	5.50901
C14E2.12	WBGene00219816	-6.18063	5.37e-12	4.34e-11	196.365	150.822	182.635	2.32053	3.95676	0
C14E2.3	WBGene00015772	5.95045	0.130019	0.188361	0	0	0	11.6026	7.91352	0
C14E2.4	WBGene00015773	5.92127	0.0557735	0.0923824	0	0	0	5.80131	5.27568	8.26351
C14E2.5	WBGene00015774	7.33886	0.00149655	0.00359305	0	0	0	5.80131	18.4649	27.545
C14E2.6	WBGene00015775	4.52464	0.00855752	0.0175025	0	3.71982	0	22.045	39.5676	33.054
C14E2.7	WBGene00044562	11.1671	4.84e-16	6.07e-15	0	0	0	175.2	172.779	385.631
C14F11.2	WBGene00015779	1.88151	1.7e-08	8.86e-08	426.863	286.765	342.44	1050.04	1449.49	1393.78
C14F11.22	WBGene00199223	2.44881	0.548421	NA	0	0	0	1.16026	0	0
C14F11.4	WBGene00015780	-6.57873	1.38e-08	7.26e-08	380.089	719.955	464.644	0	0	19.2815
C14F11.6	WBGene00015781	-8.26002	5.59e-20	1.06e-18	733.631	639.472	459.273	0	5.27568	0
C14F11.7	WBGene00015782	7.59904	0.00764676	0.0157963	0	0	0	33.6476	27.6973	0
C14H10.1	WBGene00007591	-3.5987	1.91e-19	3.41e-18	2214.8	1170.39	2094.93	134.59	133.211	187.306
C14H10.2	WBGene00007592	-1.09192	0.151738	0.21339	67.0002	231.305	499.56	81.2184	117.384	176.288
C14H10.3	WBGene00007593	0.543522	0.0903213	0.139309	728.996	664.158	938.689	932.851	1151.42	1313.9
C15A11.2	WBGene00007597	-5.56518	1.08e-11	8.44e-11	206.9	505.22	786.941	17.4039	11.8703	0
C15A11.4	WBGene00007598	-4.09798	0.00704122	0.0146641	24.4403	104.155	61.7735	0	10.5514	0
C15A11.7	WBGene00007599	-0.907904	0.178635	0.246088	204.793	252.61	189.349	163.597	147.719	30.2995
C15A7.2	WBGene00007595	11.2902	1.53e-15	1.84e-14	0	0	0	126.469	209.708	462.757
C15B12.1	WBGene00015783	-2.87094	0.0275417	0.0495523	26.9686	88.2613	32.2297	3.48079	15.827	0
C15B12.2	WBGene00015784	3.26834	0.0176996	0.0335747	0	4.39616	33.5726	127.629	92.3244	134.971
C15B12.4	WBGene00015786	0.362695	0.613924	0.686342	33.2894	50.0485	111.461	92.821	98.919	55.0901
C15B12.6	WBGene00015787	1.71354	0.00547286	0.0116812	77.9562	41.9326	33.5726	216.969	102.876	187.306
C15B12.8	WBGene00015788	1.47156	0.370842	0.455645	0	6.08699	36.2584	16.2437	65.946	33.054
C15B12.9	WBGene00044573	2.75173	0.370968	0.455719	0	4.05799	0	0	6.5946	22.036
C15C6.1	WBGene00007600	-5.79145	1.83e-16	2.4e-15	1044.61	284.736	678.166	19.7245	9.23244	5.50901
C15C6.2	WBGene00007601	-10.7563	9.84e-18	1.49e-16	1263.73	930.971	807.085	0	1.31892	0
C15C6.3	WBGene00007602	-0.273122	0.464427	0.549344	1372.45	1784.16	2791.9	1479.34	1580.07	1862.04
C15C6.4	WBGene00007603	-1.65716	0.00117288	0.00287486	168.975	133.576	230.979	49.8913	51.4379	68.8626
C15C7.4	WBGene00015790	5.1263	9.84e-18	1.49e-16	188.781	89.2758	135.633	9119.67	2069.39	3255.82
C15C7.5	WBGene00015791	-1.90396	1.66e-12	1.42e-11	2466.79	2061.8	2248.02	672.952	600.109	534.374
C15C7.6	WBGene00015792	-1.27738	0.36459	0.44898	36.2391	8.79231	45.6587	24.3655	11.8703	0
C15C7.7	WBGene00015793	0.168048	0.692884	0.754461	270.108	160.629	165.177	228.572	229.492	212.097
C15C8.11	WBGene00200986	6.40377	0.082237	0.128708	0	0	0	0	10.5514	16.527
C15C8.4	WBGene00007606	-1.58016	0.00258984	0.00593449	304.661	145.749	175.92	66.135	64.6271	79.8806
C15C8.5	WBGene00007607	3.81475	7.97e-05	0.000241223	24.4403	27.7296	0	266.86	216.303	269.941
C15C8.6	WBGene00007608	-0.32718	0.714743	0.77285	26.1259	33.1403	36.2584	12.7629	43.5244	19.2815
C15C8.7	WBGene00007609	-0.39588	0.305627	0.386186	276.007	352.031	303.496	300.508	199.157	206.588
C15C8.8	WBGene00045460	-2.22159	0.573876	NA	0	4.05799	0	0	0	0
C15F1.1	WBGene00015794	-5.64483	1.01e-23	2.7e-22	963.708	484.253	1307.99	18.5642	13.1892	24.7905
C15F1.14	WBGene00198924	-2.35512	0.550691	NA	0	0.676332	4.02871	0	0	0
C15F1.2	WBGene00015795	-6.7891	7.87e-12	6.22e-11	209.85	309.084	451.215	0	7.91352	0
C15F1.5	WBGene00015796	-5.98496	NA	NA	0.84277	55.4592	0	0	0	0
C15F1.8	WBGene00015797	-8.35263	3.09e-07	1.36e-06	27.39	86.2323	178.606	0	0	0
C15H11.1	WBGene00007613	-4.32381	0.0104587	0.0209537	0.421385	109.228	103.404	3.48079	6.5946	0
C15H11.10	WBGene00007618	-0.202282	0.926623	0.943708	0	10.145	32.2297	25.5258	10.5514	0
C15H11.11	WBGene00007619	-1.81334	0.101763	0.153838	24.4403	30.0968	60.4306	9.2821	2.63784	22.036
C15H11.13	WBGene00077576	-5.57675	0.0965547	0.147325	0	10.4831	32.2297	0	0	0
C15H11.16	WBGene00206494	5.67349	0.149372	0.210439	0	0	0	0	0	16.527
C15H7.2	WBGene00014678	-3.77905	0.335256	NA	0	10.8213	1.3429	0	0	0
C15H7.3	WBGene00007610	-11.3927	4.97e-19	8.48e-18	603.423	687.491	1107.89	0	0	0
C15H7.4	WBGene00007611	-3.62515	0.0234031	0.0429391	62.7864	78.1163	213.522	0	0	30.2995
C15H9.11	WBGene00015805	0.0907867	0.913952	0.934039	40.453	137.295	107.432	118.347	158.27	24.7905
C15H9.13	WBGene00201343	-2.22159	0.573876	NA	0	4.05799	0	0	0	0
C15H9.2	WBGene00015798	2.54132	0.0279759	0.0502449	28.6542	22.9953	0	88.18	69.9028	148.743
C15H9.3	WBGene00015799	3.26429	0.0162491	0.0310927	27.8114	0	6.71452	111.385	109.47	112.935
C15H9.4	WBGene00015800	1.04519	0.0235924	0.0432499	139.9	183.624	149.062	269.181	232.13	479.284
C15H9.5	WBGene00015801	1.07546	0.10332	0.155892	154.648	148.117	77.8884	226.251	108.151	473.775
C15H9.9	WBGene00015803	0.289852	0.244193	0.320176	2237.55	2481.12	2368.88	2597.83	3245.86	2820.61
C16A11.10	WBGene00185089	-1.20429	0.672088	0.736134	0	13.8648	29.5439	0	0	19.2815
C16A11.2	WBGene00015815	1.17444	0.131153	0.189781	19.8051	125.46	186.664	262.219	200.476	283.714
C16A11.3	WBGene00015816	-2.38831	0.0501564	0.0843593	186.252	54.7829	32.2297	32.4874	18.4649	0
C16A11.4	WBGene00015817	-1.87073	0.0862118	0.133996	199.737	228.938	226.951	51.0516	126.616	0
C16A11.5	WBGene00015818	-4.9356	0.000240926	0.000672129	45.931	70.3385	103.404	0	6.5946	0
C16A11.7	WBGene00015820	-2.39061	0.0258859	0.0469138	95.233	131.547	51.0303	29.0066	22.4216	0
C16A3.1	WBGene00015806	0.560572	0.480459	0.564648	34.5536	100.097	32.2297	64.9747	131.892	49.5811
C16A3.10	WBGene00015814	-1.44802	2.32e-05	7.66e-05	1332.84	1030.05	1277.1	389.848	575.049	366.349
C16A3.15	WBGene00200702	6.57425	0.0154858	0.0297701	0	0	0	3.48079	13.1892	13.7725
C16A3.2	WBGene00015807	3.95592	0.0135017	0.0263234	0	30.4349	0	147.353	108.151	225.869
C16A3.4	WBGene00015809	0.549473	0.222272	0.296112	482.065	818.699	672.794	1449.17	804.541	630.781
C16A3.5	WBGene00015810	-1.59909	4.11e-07	1.78e-06	4253.88	4458.04	4314.75	1608.12	1680.3	1005.39
C16A3.6	WBGene00015811	-0.0937969	0.818028	0.859298	1293.65	1438.56	1431.53	1900.51	1216.04	779.525
C16B8.2	WBGene00015822	0.1522	0.78575	0.833061	119.252	68.9858	182.635	132.27	158.27	118.444
C16B8.3	WBGene00015823	-0.870206	0.116517	0.172623	1602.53	2320.83	1502.71	1111.53	1511.48	341.558
C16B8.4	WBGene00015824	3.53876	3.24e-24	9.04e-23	54.3587	72.7057	57.7448	659.029	671.33	829.106
C16B8.5	WBGene00022926	2.44881	0.548421	NA	0	0	0	0	0	2.7545
C16B8.8	WBGene00199661	4.64816	0.240961	NA	0	0	0	0	0	8.26351
C16B8.t3	WBGene00022929	-3.49578	0.373136	NA	0	4.73432	5.37161	0	0	0
C16C10.1	WBGene00007622	-2.23863	0.0215454	0.0399022	81.7487	168.407	71.1739	46.4105	17.146	2.7545
C16C10.13	WBGene00007632	-6.19745	0.0318084	0.0563754	37.5033	27.7296	0	0	0	0
C16C10.2	WBGene00007623	-1.32765	0.000482774	0.00127349	341.322	283.045	404.214	145.033	121.341	143.234
C16C10.4	WBGene00007625	-0.535716	0.336876	0.420009	278.114	359.47	155.777	187.963	104.195	258.923
C16C10.8	WBGene00007628	0.283421	0.553639	0.632438	211.957	342.9	409.585	566.208	313.903	289.223
C16C10.9	WBGene00007629	8.26285	5.67e-05	0.0001756	0	0	0	44.09	47.4811	5.50901
C16C2.4	WBGene00007621	-1.59392	0.000150841	0.000436176	1153.33	1901.51	2936.93	636.984	639.676	707.908
C16C4.18	WBGene00194998	-2.50489	0.261395	0.338761	0.84277	33.1403	20.1435	0	9.23244	0
C16C8.11	WBGene00015849	-0.165839	0.940638	0.954729	0	7.43965	29.5439	15.0834	17.146	0
C16C8.12	WBGene00015850	-1.34977	0.545266	0.625076	7.16355	28.0678	0	6.96158	6.5946	0
C16C8.13	WBGene00015851	0.0202577	0.995727	0.997394	0	11.4976	0	11.6026	0	0
C16C8.14	WBGene00015852	-7.55805	4e-06	1.5e-05	75.8493	33.1403	59.0877	0	0	0
C16C8.16	WBGene00015853	-2.1664	0.29641	0.376432	0	60.1935	76.5455	2.32053	27.6973	0
C16C8.17	WBGene00015854	-4.96765	0.204304	0.275883	27.8114	0	0	0	0	0
C16C8.18	WBGene00015855	-3.76609	5.28e-05	0.000164199	186.674	141.015	139.662	8.12184	1.31892	27.545
C16C8.19	WBGene00015856	-2.62851	0.504683	NA	0	5.41065	0	0	0	0
C16C8.20	WBGene00195070	-3.26313	0.406159	NA	0	8.45415	0	0	0	0
C16C8.22	WBGene00195072	-6.56075	0.000522821	0.001371	29.9183	26.0388	28.201	0	0	0
C16C8.4	WBGene00015842	-3.16998	0.00815919	0.0167618	30.3397	44.6379	60.4306	3.48079	10.5514	0
C16C8.5	WBGene00015843	-2.84957	0.017098	0.0325519	21.4906	48.3577	55.059	6.96158	9.23244	0
C16D2.1	WBGene00007633	-2.30168	0.147122	0.208284	57.3084	54.4447	0	9.2821	5.27568	8.26351
C16D2.2	WBGene00195143	1.56694	0.249496	0.326044	0	72.3675	161.148	167.078	228.173	294.732
C16D6.1	WBGene00007634	3.68759	0.0447998	0.0762221	0	0	16.1148	68.4555	76.4974	52.3356
C16D9.1	WBGene00015857	0.646451	0.659493	0.725179	0.421385	13.8648	71.1739	25.5258	87.0487	19.2815
C16D9.3	WBGene00015858	5.53147	0.160133	NA	0	0	0	0	9.23244	5.50901
C16D9.4	WBGene00015859	-2.50015	0.0223177	0.0411961	281.485	114.638	127.576	8.12184	80.4541	2.7545
C16D9.5	WBGene00015860	-0.338794	0.794581	0.840301	20.2265	50.7249	72.5168	39.4489	72.5406	0
C16D9.6	WBGene00015861	4.57684	1.01e-06	4.15e-06	29.9183	28.4059	0	372.444	357.427	696.89
C16D9.9	WBGene00015864	3.77639	0.00204261	0.00477259	0	19.2755	56.4019	432.778	245.319	344.313
C16E9.1	WBGene00015865	-2.08107	9.02e-06	3.2e-05	403.266	263.093	369.298	62.6542	112.108	68.8626
C16E9.14	WBGene00197458	0.357125	0.929898	NA	0	0	1.3429	0	0	0
C16E9.16	WBGene00198020	5.89956	0.133418	0.191969	0	0	0	0	0	19.2815
C16E9.2	WBGene00015866	2.93397	1.45e-11	1.1e-10	191.73	131.885	136.976	792.46	1005.02	1732.58
C16E9.20	WBGene00199880	4.65153	0.240605	NA	0	0	0	0	2.63784	5.50901
C16E9.24	WBGene00201116	2.44881	0.548421	NA	0	0	0	1.16026	0	0
C16E9.27	WBGene00201729	-0.479924	0.904891	NA	0	1.0145	0	0	0	0
C16H3.3	WBGene00015868	2.9057	6.57e-14	6.64e-13	225.441	353.383	380.042	1953.88	1991.57	3233.79
C17A2.7	WBGene00015875	-5.03159	0.198506	0.269186	29.0756	0	0	0	0	0
C17B7.12	WBGene00015886	-2.71449	0.49064	NA	0	5.74882	0	0	0	0
C17B7.15	WBGene00268213	-1.65185	0.677424	NA	0	2.70533	0	0	0	0
C17B7.2	WBGene00015876	-5.83594	0.0131306	0.0256664	23.1762	3.71982	24.1723	0	0	0
C17B7.4	WBGene00015878	-5.01059	0.200397	0.271351	28.6542	0	0	0	0	0
C17B7.5	WBGene00015879	-4.58789	0.241298	0.317227	0	6.76332	14.7719	0	0	0
C17B7.9	WBGene00015883	-4.67908	0.23201	0.306916	22.7548	0	0	0	0	0
C17C3.1	WBGene00015887	-2.94554	2.39e-08	1.22e-07	943.903	472.756	844.686	51.0516	141.124	101.917
C17C3.11	WBGene00015893	1.87312	0.520449	0.602421	0	10.145	0	0	10.5514	27.545
C17C3.22	WBGene00196827	4.98496	0.207203	NA	0	0	0	4.64105	0	5.50901
C17C3.3	WBGene00015889	1.97812	0.419022	0.504514	0	6.42515	1.3429	16.2437	14.5081	0
C17C3.5	WBGene00015890	-3.61109	0.182713	0.251047	0	32.4639	28.201	0	0	5.50901
C17C3.9	WBGene00015892	-5.85093	0.0268305	0.0484436	0.421385	21.6426	29.5439	0	0	0
C17D12.5	WBGene00007639	-1.82813	0.633564	0.703312	0	16.9083	0	4.64105	0	0
C17D12.7	WBGene00007640	-1.9989	7.29e-05	0.000222127	180.774	144.735	138.319	34.8079	38.2487	44.0721
C17E4.1	WBGene00007641	-7.4677	0.00354464	0.00788992	0	69.324	88.6316	0	0	0
C17E4.10	WBGene00007647	2.37357	1.45e-15	1.75e-14	739.531	631.694	886.316	3860.19	3302.58	4525.65
C17E4.11	WBGene00044236	-0.432489	0.497076	0.58005	55.2014	73.0438	57.7448	53.3721	30.3352	55.0901
C17E4.12	WBGene00044769	3.92964	0.317145	NA	0	0	1.3429	10.4424	0	0
C17E4.15	WBGene00196780	5.40534	0.170185	NA	0	0	0	0	0	13.7725
C17E4.19	WBGene00219310	-2.43939	0.536295	NA	0	4.73432	0	0	0	0
C17E4.20	WBGene00219313	2.99785	2.15e-08	1.1e-07	26.5473	33.4784	67.1452	255.258	371.936	369.104
C17E4.4	WBGene00007644	-2.97132	0.0696657	0.111878	75.0065	36.5219	37.6013	0	18.4649	0
C17E4.6	WBGene00007645	0.866647	0.034094	0.0599784	666.631	627.298	1277.1	1531.55	1297.82	1853.78
C17E7.12	WBGene00015905	-3.09386	0.279045	0.35723	0	8.45415	33.5726	4.64105	0	0
C17E7.13	WBGene00015906	5.38715	0.171674	NA	0	0	0	0	13.1892	0
C17E7.4	WBGene00015899	-3.42481	0.383027	NA	0	9.46864	0	0	0	0
C17E7.9	WBGene00015903	-3.36991	0.187213	0.256378	0	12.5121	75.2026	8.12184	0	0
C17F3.1	WBGene00015907	-10.5881	1.4e-16	1.85e-15	372.504	432.852	568.048	0	0	0
C17F3.3	WBGene00015908	-7.15477	4.68e-22	1.1e-20	704.134	1420.97	2660.29	15.0834	15.827	0
C17F3.4	WBGene00199148	-4.97359	0.20376	0.275256	0	0	28.201	0	0	0
C17F4.11	WBGene00044373	8.42272	0.000802394	0.00202838	0	0	0	44.09	64.6271	0
C17F4.12	WBGene00044374	-8.01435	1.42e-06	5.68e-06	150.856	41.5944	37.6013	0	0	0
C17F4.2	WBGene00015910	-8.26314	2.03e-08	1.05e-07	81.3273	117.005	75.2026	0	0	0
C17F4.3	WBGene00015911	-7.01588	8.08e-06	2.88e-05	119.673	35.1692	69.831	0	0	2.7545
C17F4.7	WBGene00015913	-5.12605	3.04e-19	5.35e-18	43019.6	58732	44460.8	2060.63	1730.42	391.14
C17F4.8	WBGene00015914	2.86199	0.0436585	0.0745854	0	5.07249	51.0303	150.834	141.124	107.426
C17G1.1	WBGene00007648	-2.13688	0.452356	0.537264	29.0756	6.42515	0	0	7.91352	0
C17G1.13	WBGene00200358	0.89865	0.815014	NA	0	3.71982	0	6.96158	0	0
C17G1.2	WBGene00007649	-8.66412	2.14e-09	1.25e-08	71.2141	143.044	147.719	0	0	0
C17G1.5	WBGene00007652	-2.39262	0.0014505	0.00349069	458.046	86.9086	251.123	78.8979	40.8865	30.2995
C17G1.9	WBGene00197154	3.23054	0.423525	NA	0	0	0	0	2.63784	0
C17G10.1	WBGene00015915	-0.726816	0.362327	0.446416	45.0882	54.7829	149.062	27.8463	46.1622	77.1261
C17G10.10	WBGene00195182	1.46717	0.697782	0.758672	0	6.76332	0	0	0	19.2815
C17G10.13	WBGene00270322	0.557931	0.190268	0.2599	112.931	119.373	124.89	160.116	217.622	145.989
C17G10.14	WBGene00271650	-2.22159	0.573876	NA	0	4.05799	0	0	0	0
C17G10.2	WBGene00015916	-2.33166	0.000320453	0.000875266	368.712	334.784	134.29	33.6476	88.3677	44.0721
C17G10.3	WBGene00015917	-3.31317	7.29e-05	0.00022198	105.346	149.131	277.981	27.8463	3.95676	22.036
C17G10.6	WBGene00015918	2.66079	0.0178319	0.0337934	4.21385	12.5121	1.3429	37.1284	54.0757	27.545
C17G10.7	WBGene00015919	2.40905	6.19e-06	2.25e-05	85.9626	97.7299	182.635	446.701	477.449	1013.66
C17G10.9	WBGene00015920	0.0530261	0.910415	0.931523	828.443	619.52	312.896	548.804	503.828	779.525
C17H1.1	WBGene00007654	8.0951	0.00368212	0.00817599	0	0	0	0	15.827	71.6171
C17H1.10	WBGene00044237	-5.92002	0.00829991	0.0170319	23.1762	6.76332	24.1723	0	0	0
C17H1.2	WBGene00007655	0.00901276	0.997815	0.99875	1.26416	11.4976	0	12.7629	0	0
C17H1.4	WBGene00007657	1.945	0.607091	0.680457	0	5.41065	0	0	21.1027	0
C17H1.5	WBGene00007658	-4.49192	0.251356	0.327931	0	19.9518	0	0	0	0
C17H1.7	WBGene00007660	-2.62388	0.0621063	0.101247	33.2894	89.2758	44.3158	0	3.95676	24.7905
C17H1.9	WBGene00007662	0.774013	0.837966	0.874976	0	7.77781	0	0	0	13.7725
C17H11.1	WBGene00015921	6.93569	4.73e-14	4.83e-13	1.68554	16.9083	0	992.025	733.32	724.435
C17H11.2	WBGene00015922	2.13828	0.000933356	0.00232923	82.5915	70.3385	21.4864	263.38	170.141	344.313
C17H11.5	WBGene00015925	2.98605	0.109501	0.16385	0	16.5701	0	39.4489	21.1027	74.3716
C17H11.6	WBGene00015926	2.6993	2.69e-22	6.38e-21	589.518	451.113	464.644	3068.9	3062.53	3655.23
C17H12.10	WBGene00015935	3.58483	5.78e-07	2.45e-06	132.315	17.9228	33.5726	753.011	725.406	738.207
C17H12.11	WBGene00015936	-3.02543	0.0657921	0.106476	109.139	67.6332	0	3.48079	2.63784	16.527
C17H12.12	WBGene00015937	-2.49308	0.00470735	0.0101864	34.975	110.58	162.491	17.4039	27.6973	8.26351
C17H12.2	WBGene00015928	-0.345421	0.442436	0.527324	300.026	357.103	247.094	176.36	196.519	344.313
C17H12.3	WBGene00015929	-9.42807	3.65e-12	3.01e-11	152.12	184.977	277.981	0	0	0
C17H12.37	WBGene00236786	-2.53706	0.519848	NA	0	5.07249	0	0	0	0
C17H12.4	WBGene00015930	-0.893506	0.26537	0.34304	230.498	78.4545	106.089	25.5258	134.53	63.3536
C17H12.5	WBGene00015931	-8.45442	8.97e-09	4.83e-08	63.2078	128.841	120.861	0	0	0
C17H12.6	WBGene00015932	-2.46308	0.0714927	0.114262	91.0192	61.208	32.2297	2.32053	30.3352	0
C17H12.8	WBGene00015933	-4.35864	5.93e-35	3.74e-33	4242.93	5585.82	3850.1	168.238	288.844	209.342
C18A11.1	WBGene00015947	-1.00923	0.0365408	0.0637077	240.189	331.741	333.04	161.277	199.157	85.3896
C18A11.2	WBGene00015948	2.66258	1.87e-09	1.1e-08	104.504	204.928	210.836	1420.16	796.628	1068.75
C18A11.3	WBGene00015949	-2.82958	0.00467962	0.0101327	386.832	358.456	601.621	85.8595	101.557	0
C18A3.1	WBGene00015939	-0.256524	0.865161	0.895842	24.4403	56.1355	0	11.6026	23.7406	33.054
C18A3.10	WBGene00015946	-0.976948	0.454887	0.539789	24.4403	59.179	38.9442	15.0834	46.1622	0
C18A3.17	WBGene00196874	-0.263168	0.947877	NA	0.84277	0	0	0	0	0
C18A3.18	WBGene00197102	3.23054	0.423525	NA	0	0	0	0	2.63784	0
C18A3.2	WBGene00015940	0.543104	0.272022	0.350308	198.894	111.933	146.376	176.36	179.373	314.013
C18A3.24	WBGene00219823	4.64816	0.240961	NA	0	0	0	0	0	8.26351
C18A3.3	WBGene00015941	-3.08105	4.09e-12	3.34e-11	603.002	959.715	1399.3	127.629	123.979	96.4076
C18A3.7	WBGene00015944	-4.91855	1.24e-05	4.3e-05	96.4972	58.5027	204.121	9.2821	1.31892	0
C18A3.9	WBGene00015945	1.53225	0.691923	NA	0	2.36716	0	6.96158	0	0
C18B10.6	WBGene00015963	0.696542	0.841524	0.877401	0	7.43965	0	8.12184	3.95676	0
C18B12.10	WBGene00195785	-3.02748	0.0201672	0.0376228	38.346	33.1403	38.9442	8.12184	0	5.50901
C18B12.4	WBGene00007666	1.12546	0.000534966	0.00140073	910.613	731.791	876.916	1634.81	1496.97	2368.87
C18B12.6	WBGene00007668	-0.654185	0.214676	0.287873	226.705	164.687	188.006	96.3018	83.092	192.815
C18B2.1	WBGene00015952	1.27342	0.50833	0.590916	29.9183	0.338166	0	33.6476	34.2919	5.50901
C18B2.2	WBGene00015953	4.94974	0.000660988	0.00170117	0	10.8213	0	91.6608	113.427	148.743
C18B2.3	WBGene00015954	-0.846196	0.0752196	0.119164	932.947	608.36	846.029	276.143	702.985	347.068
C18B2.4	WBGene00015955	1.14214	0.000205327	0.000580376	884.909	729.086	686.223	1733.43	1361.13	1988.75
C18B2.5	WBGene00015956	-0.728812	0.0770852	0.121697	2291.91	2457.11	2550.17	1466.57	2111.59	820.842
C18C4.17	WBGene00219824	-0.500477	0.853478	0.886921	0	2.70533	13.429	5.80131	0	5.50901
C18C4.7	WBGene00015968	-1.39646	0.0190939	0.0358132	318.146	354.06	143.691	64.9747	156.952	88.1441
C18D1.11	WBGene00196105	5.40534	0.170185	NA	0	0	0	0	0	13.7725
C18D1.2	WBGene00007669	-2.47404	0.431795	0.517147	0	3.04349	24.1723	4.64105	0	0
C18D11.1	WBGene00007679	-4.07899	2.13e-20	4.21e-19	1867.16	844.062	1238.16	91.6608	64.6271	77.1261
C18D11.10	WBGene00194727	7.39066	0.0012673	0.00308621	0	0	0	30.1668	6.5946	16.527
C18D11.3	WBGene00007681	-2.58908	3.95e-05	0.00012543	436.555	238.407	354.526	99.7826	43.5244	24.7905
C18D11.6	WBGene00007682	-1.28404	0.506215	0.588813	52.6731	47.6814	17.4577	0	0	49.5811
C18D11.7	WBGene00044232	-3.29482	0.211901	0.284547	31.1825	0	44.3158	0	0	8.26351
C18D4.10	WBGene00077438	4.22725	0.288543	NA	0	0	0	5.80131	0	0
C18D4.12	WBGene00219493	1.18669	0.754195	0.806251	0	6.08699	0	13.9232	0	0
C18D4.6	WBGene00007675	3.58706	0.000321811	0.000878421	27.8114	19.9518	0	179.841	226.854	181.797
C18D4.8	WBGene00007677	3.60955	0.161076	0.224639	0	5.07249	0	52.2118	11.8703	0
C18E3.1	WBGene00015970	-4.16858	0.00121579	0.00297036	88.0695	53.092	24.1723	6.96158	1.31892	0
C18E3.3	WBGene00015972	1.34212	0.0395186	0.0683497	32.868	107.875	116.833	212.328	145.081	294.732
C18E3.5	WBGene00015974	-0.728112	0.163531	0.227631	93.5475	135.266	126.233	53.3721	84.4109	77.1261
C18E3.9	WBGene00015976	-1.07504	0.0652168	0.105693	74.1638	90.6284	143.691	47.5708	46.1622	52.3356
C18E9.2	WBGene00007683	-2.72775	5.98e-09	3.29e-08	4510.51	4419.83	9432.55	713.562	699.028	1363.48
C18E9.4	WBGene00007684	-1.45069	5.88e-07	2.48e-06	1634.55	2032.04	1812.92	672.952	768.931	559.164
C18E9.5	WBGene00007685	-1.13433	0.0397518	0.0686913	665.367	414.929	511.646	310.95	316.541	93.6531
C18E9.7	WBGene00007687	-1.5464	0.0485117	0.0819187	181.196	139.662	192.035	106.744	13.1892	55.0901
C18E9.8	WBGene00007688	-4.44763	0.000808623	0.00204323	57.7298	106.86	111.461	11.6026	0	0
C18E9.9	WBGene00007689	-1.16777	0.00131543	0.00319266	918.198	966.816	718.453	462.945	419.417	272.696
C18F10.2	WBGene00015977	6.74896	7.18e-09	3.91e-08	0	6.76332	0	177.52	323.136	314.013
C18F10.7	WBGene00015978	0.967974	0.0134673	0.026271	416.328	590.099	326.325	1082.53	834.877	691.381
C18G1.1	WBGene00015980	3.25804	1.81e-07	8.21e-07	89.3336	46.3287	17.4577	576.651	531.525	374.613
C18G1.3	WBGene00015982	-1.03352	0.796042	NA	0	1.69083	0	0	0	0
C18G1.6	WBGene00015984	2.58773	0.0250996	0.0456318	18.5409	14.8793	0	63.8145	79.1352	63.3536
C18G1.7	WBGene00015985	6.69166	0.0111659	0.0222038	0	0	0	4.64105	9.23244	19.2815
C18G1.8	WBGene00015986	8.95194	4.33e-07	1.87e-06	0	0	0	19.7245	96.2812	41.3176
C18G1.9	WBGene00015987	-8.25201	1.73e-08	9e-08	82.1701	81.1598	108.775	0	0	0
C18H2.1	WBGene00015988	-1.84291	0.0441625	0.0753152	60.2581	31.4494	28.201	11.6026	13.1892	8.26351
C18H2.2	WBGene00015989	2.5002	0.259742	0.337047	0	7.10148	0	8.12184	11.8703	22.036
C18H2.3	WBGene00015990	-1.4199	0.721389	NA	0.421385	0.676332	1.3429	0	0	0
C18H2.4	WBGene00015991	-3.00454	0.270968	0.349132	0	11.8358	42.9729	0	6.5946	0
C18H2.5	WBGene00015992	-7.08457	0.00629671	0.0132679	96.0758	24.6861	0	0	0	0
C18H7.1	WBGene00015993	7.53358	2.36e-10	1.55e-09	0	8.79231	0	792.46	791.352	198.324
C18H7.11	WBGene00044457	-2.24739	0.0356562	0.0623722	122.623	100.435	248.437	39.4489	58.0325	0
C18H7.12	WBGene00189987	-3.29265	0.000114725	0.000338571	430.234	452.128	44.3158	40.6092	21.1027	33.054
C18H7.4	WBGene00015994	-6.75223	1.48e-07	6.83e-07	88.0695	90.9666	150.405	0	2.63784	0
C18H7.6	WBGene00015996	5.11865	3.58e-06	1.35e-05	0	24.3479	12.0861	585.933	412.822	269.941
C18H7.7	WBGene00015997	-7.35592	0.00463415	0.0100493	0	92.3193	53.7161	0	0	0
C18H9.1	WBGene00016000	0.63223	0.740667	0.795278	0	6.42515	25.5152	6.96158	3.95676	38.5631
C18H9.10	WBGene00199673	-1.25079	0.753954	NA	0	2.029	0	0	0	0
C18H9.3	WBGene00016002	-0.105436	0.825724	0.86524	616.065	832.902	1710.86	844.671	852.023	1239.53
C18H9.5	WBGene00016003	-4.96835	5e-11	3.56e-10	346.379	216.426	299.467	8.12184	17.146	0
C18H9.6	WBGene00016004	-1.37499	0.00775555	0.0159981	403.687	333.432	572.077	125.308	266.422	110.18
C23F12.3	WBGene00016008	4.39859	0.268437	NA	0	0	0	0	6.5946	0
C23F12.4	WBGene00016009	0.40029	0.401071	0.486344	225.02	109.904	128.919	208.847	205.752	198.324
C23G10.1	WBGene00016010	-7.94614	1.93e-06	7.56e-06	23.1762	122.754	73.8597	0	0	0
C23G10.10	WBGene00016016	1.50423	0.278599	0.356764	30.7611	15.2175	0	34.8079	21.1027	77.1261
C23G10.11	WBGene00016017	6.02241	0.125331	0.183005	0	0	0	13.9232	6.5946	0
C23G10.14	WBGene00271647	5.96342	0.129164	0.187278	0	0	0	11.6026	0	8.26351
C23G10.2	WBGene00016011	-2.91189	1.06e-11	8.3e-11	1538.9	1672.57	1953.92	193.764	348.195	140.48
C23G10.5	WBGene00016012	-0.879531	0.758269	0.809468	0	15.5556	24.1723	0	0	22.036
C23G10.6	WBGene00016013	-7.82219	3.22e-20	6.29e-19	1779.09	628.312	1157.58	1.16026	13.1892	0
[truncated: 17,820 more rows]
