# Supplementary material for: Profiling neural editomes reveals a molecular mechanism to regulate RNA editing during development
Source: HighWire-hosted journal article supplement (doi:10.1101/gr.267575.120), 2020-12-18
Supplement: Supplemental_Table_S6.xlsx [file Supplemental_Table_S6.xlsx]

## Sheet: Diff exp adr-2(-) L1 to adults
Supplemental Table 6: Differential gene expression analysis of L1 and adult neural cells from adr-2(-) worms (related to Supplemental Fig. S3C). Expression of all genes in adr-2(-) L1 and adult neural RNA-seq datasets from three biological replicates are listed by gene name (column A) and Wormbase annotation (column B). DESeq2 values for (L1 neural /adult neural) are listed (log2 Fold change) as …
Gene Name	Gene ID	log2FoldChange	pvalue	padj	adr-2(-) adult rep.1	adr-2(-) adult rep.2	adr-2(-) adult rep.3	adr-2(-) L1 rep.1	adr-2(-) L1 rep.2	adr-2(-) L1 rep.3
21ur-10387	WBGene00166235	1.05137	0.796119	NA	0	0	0	0.553051	0	0
21ur-10438	WBGene00167160	-0.798918	0.844774	NA	0.979556	0	0	0	0	0
21ur-10481	WBGene00173323	2.03706	0.61266	NA	0	0	0	1.65915	0	0
21ur-11316	WBGene00165660	1.05137	0.796119	NA	0	0	0	0.553051	0	0
21ur-11585	WBGene00170835	1.61916	0.688888	NA	0	0	0	1.1061	0	0
21ur-11641	WBGene00168911	-4.56974	0.244311	NA	0	13.2268	0	0	0	0
21ur-11797	WBGene00168225	-2.35087	0.514743	NA	1.95911	8.50297	0	1.65915	0	0
21ur-11931	WBGene00167536	2.3444	0.558942	NA	0	0	0	2.2122	0	0
21ur-11958	WBGene00174888	1.05137	0.796119	NA	0	0	0	0.553051	0	0
21ur-12037	WBGene00165783	-3.61864	0.358616	NA	6.85689	0	0	0	0	0
21ur-1210	WBGene00047118	1.05137	0.796119	NA	0	0	0	0.553051	0	0
21ur-12145	WBGene00168654	5.31091	0.175775	0.265992	0	0	0	0	0	19.6335
21ur-12195	WBGene00173930	4.06014	0.303313	NA	0	0	0	1.1061	6.5153	0.853628
21ur-12218	WBGene00174366	1.61916	0.688888	NA	0	0	0	1.1061	0	0
21ur-12225	WBGene00170788	1.05137	0.796119	NA	0	0	0	0.553051	0	0
21ur-12330	WBGene00166311	-3.24603	0.407585	NA	9.79556	0	0	0.553051	0	0
21ur-12358	WBGene00173609	1.05137	0.796119	NA	0	0	0	0.553051	0	0
21ur-12385	WBGene00174869	-0.798918	0.844774	NA	0	0.944774	0	0	0	0
21ur-12617	WBGene00169944	-3.56851	0.365463	NA	0	6.61342	0	0	0	0
21ur-12633	WBGene00168715	-3.83281	0.330291	NA	0	0	7.89579	0	0	0
21ur-12642	WBGene00165762	-4.3981	0.262759	NA	11.7547	0	0	0	0	0
21ur-12671	WBGene00172475	2.03706	0.61266	NA	0	0	0	1.65915	0	0
21ur-13215	WBGene00169594	1.05137	0.796119	NA	0	0	0	0.553051	0	0
21ur-13217	WBGene00170694	4.67998	0.233883	NA	0	0	0	0	13.0306	0
21ur-13362	WBGene00173026	4.07898	0.301016	NA	0	0	0	0	8.68707	0
21ur-13378	WBGene00174084	1.05137	0.796119	NA	0	0	0	0.553051	0	0
21ur-13428	WBGene00167949	1.27791	0.753072	NA	0	0	0	0	2.17177	0
21ur-13840	WBGene00166322	2.58794	0.518014	NA	0	0	0	2.76526	0	0
21ur-14036	WBGene00169595	1.61916	0.688888	NA	0	0	0	1.1061	0	0
21ur-14076	WBGene00171305	5.24709	0.181103	0.271547	0	0	0	0	0	18.7798
21ur-14084	WBGene00170117	3.34473	0.0815138	0.147175	0.979556	0	1.57916	4.97746	8.68707	12.8044
21ur-14115	WBGene00171917	1.05137	0.796119	NA	0	0	0	0.553051	0	0
21ur-14330	WBGene00170809	-5.40815	0.119484	0.198937	0	18.8955	4.73748	0	0	0
21ur-14353	WBGene00169631	-2.34299	0.557171	NA	0	2.83432	0	0	0	0
21ur-14376	WBGene00173337	1.05137	0.796119	NA	0	0	0	0.553051	0	0
21ur-14426	WBGene00166253	1.05137	0.796119	NA	0	0	0	0.553051	0	0
21ur-14649	WBGene00172481	1.27791	0.753072	NA	0	0	0	0	0	0.853628
21ur-14662	WBGene00173106	1.61916	0.688888	NA	0	0	0	1.1061	0	0
21ur-14686	WBGene00167758	1.61916	0.688888	NA	0	0	0	1.1061	0	0
21ur-14731	WBGene00165013	1.2165	0.728371	0.797186	0	0	4.73748	0.553051	10.8588	0
21ur-14760	WBGene00172655	-4.46273	0.255701	NA	0	12.2821	0	0	0	0
21ur-14807	WBGene00170252	-0.798918	0.844774	NA	0.979556	0	0	0	0	0
21ur-14816	WBGene00167243	1.05137	0.796119	NA	0	0	0	0.553051	0	0
21ur-14823	WBGene00173055	-5.91984	0.0160441	0.0390964	2.93867	18.8955	11.8437	0	0	0
21ur-1490	WBGene00049485	-4.3981	0.262759	NA	11.7547	0	0	0	0	0
21ur-14999	WBGene00174925	2.80872	0.481926	NA	0	0	0	3.31831	0	0
21ur-15085	WBGene00172191	3.64799	0.356514	NA	0	0	0	0	6.5153	0
21ur-15284	WBGene00170977	5.5412	0.157529	0.2453	0	0	0	0	0	23.048
21ur-15396	WBGene00169633	1.95666	0.623682	NA	0.979556	0	0	1.65915	2.17177	0
21ur-15545	WBGene00167440	1.05137	0.796119	NA	0	0	0	0.553051	0	0
21ur-15576	WBGene00169072	-5.56517	0.0559449	0.109273	1.95911	23.6194	0.789579	0	0	0
21ur-15583	WBGene00171984	3.64799	0.356514	NA	0	0	0	0	6.5153	0
21ur-1570	WBGene00046371	1.61916	0.688888	NA	0	0	0	1.1061	0	0
21ur-1572	WBGene00045645	5.24709	0.181103	0.271547	0	0	0	0	0	18.7798
21ur-1852	WBGene00048875	4.90697	0.211562	0.303576	0	0	0	0	15.2024	0
21ur-1973	WBGene00048820	1.05137	0.796119	NA	0	0	0	0.553051	0	0
21ur-2036	WBGene00049718	1.05137	0.796119	NA	0	0	0	0.553051	0	0
21ur-2167	WBGene00047030	-0.798918	0.844774	NA	0.979556	0	0	0	0	0
21ur-2655	WBGene00047432	1.61916	0.688888	NA	0	0	0	1.1061	0	0
21ur-281	WBGene00046421	1.05137	0.796119	NA	0	0	0	0.553051	0	0
21ur-3106	WBGene00045796	1.61916	0.688888	NA	0	0	0	1.1061	0	0
21ur-3380	WBGene00048441	-4.09486	0.297684	NA	0	0	9.47495	0	0	0
21ur-3632	WBGene00050627	1.05137	0.796119	NA	0	0	0	0.553051	0	0
21ur-3688	WBGene00047490	1.61916	0.688888	NA	0	0	0	1.1061	0	0
21ur-3690	WBGene00045866	2.03706	0.61266	NA	0	0	0	1.65915	0	0
21ur-3783	WBGene00047006	-2.80807	0.479154	NA	3.91822	0	0	0	0	0
21ur-3818	WBGene00045787	5.1103	0.192931	0.284689	0	0	0	0	0	17.0726
21ur-3879	WBGene00048393	5.78538	0.139807	0.224111	0	0	0	0	0	27.3161
21ur-3987	WBGene00045529	2.3444	0.558942	NA	0	0	0	2.2122	0	0
21ur-4044	WBGene00048680	1.05137	0.796119	NA	0	0	0	0.553051	0	0
21ur-4385	WBGene00048676	2.3444	0.558942	NA	0	0	0	2.2122	0	0
21ur-4445	WBGene00047312	1.61916	0.688888	NA	0	0	0	1.1061	0	0
21ur-4577	WBGene00046257	3.88969	0.32463	NA	0	0	0	7.18966	0	0
21ur-4615	WBGene00046859	2.3444	0.558942	NA	0	0	0	2.2122	0	0
21ur-4694	WBGene00046287	4.69783	0.232069	NA	0	0	0	0	0	12.8044
21ur-477	WBGene00047656	2.3444	0.558942	NA	0	0	0	2.2122	0	0
21ur-4823	WBGene00046605	4.95916	0.206659	0.298519	0	0	0	0	0	15.3653
21ur-4923	WBGene00050125	1.27791	0.753072	NA	0	0	0	0	0	0.853628
21ur-5008	WBGene00047124	2.58794	0.518014	NA	0	0	0	2.76526	0	0
21ur-5285	WBGene00050590	2.3444	0.558942	NA	0	0	0	2.2122	0	0
21ur-5405	WBGene00050829	1.61916	0.688888	NA	0	0	0	1.1061	0	0
21ur-5480	WBGene00170875	-3.68146	0.350152	NA	0	0	7.10622	0	0	0
21ur-5910	WBGene00172457	-3.51234	0.373232	NA	0	0	6.31664	0	0	0
21ur-5938	WBGene00168642	5.31648	0.16563	0.254733	0	0	0	0.553051	19.5459	0
21ur-6112	WBGene00171330	2.03706	0.61266	NA	0	0	0	1.65915	0	0
21ur-6508	WBGene00166921	1.05137	0.796119	NA	0	0	0	0.553051	0	0
21ur-6679	WBGene00167223	1.05137	0.796119	NA	0	0	0	0.553051	0	0
21ur-6771	WBGene00170666	2.3444	0.558942	NA	0	0	0	2.2122	0	0
21ur-6778	WBGene00171255	1.61916	0.688888	NA	0	0	0	1.1061	0	0
21ur-6990	WBGene00170986	1.05137	0.796119	NA	0	0	0	0.553051	0	0
21ur-7	WBGene00050360	2.3444	0.558942	NA	0	0	0	2.2122	0	0
21ur-7094	WBGene00165542	1.61916	0.688888	NA	0	0	0	1.1061	0	0
21ur-7167	WBGene00171968	2.03706	0.61266	NA	0	0	0	1.65915	0	0
21ur-75	WBGene00046978	2.03706	0.61266	NA	0	0	0	1.65915	0	0
21ur-7587	WBGene00174327	1.05137	0.796119	NA	0	0	0	0.553051	0	0
21ur-7748	WBGene00173566	-4.09486	0.297684	NA	0	0	9.47495	0	0	0
21ur-8034	WBGene00169921	1.05137	0.796119	NA	0	0	0	0.553051	0	0
21ur-8523	WBGene00166130	1.05137	0.796119	NA	0	0	0	0.553051	0	0
21ur-8581	WBGene00169820	3.64799	0.356514	NA	0	0	0	0	6.5153	0
21ur-8612	WBGene00171166	1.05137	0.796119	NA	0	0	0	0.553051	0	0
21ur-8638	WBGene00171961	2.03706	0.61266	NA	0	0	0	1.65915	0	0
21ur-8658	WBGene00171937	-3.08212	0.4361	NA	0	4.72387	0	0	0	0
21ur-8717	WBGene00165120	1.05137	0.796119	NA	0	0	0	0.553051	0	0
21ur-874	WBGene00050187	5.43064	0.166098	0.255097	0	0	0	0	0	21.3407
21ur-8767	WBGene00172296	2.3444	0.558942	NA	0	0	0	2.2122	0	0
21ur-8881	WBGene00173110	2.03706	0.61266	NA	0	0	0	1.65915	0	0
21ur-9360	WBGene00172012	-0.798918	0.844774	NA	0.979556	0	0	0	0	0
21ur-9463	WBGene00169699	2.80872	0.481926	NA	0	0	0	3.31831	0	0
21ur-9498	WBGene00167156	1.05137	0.796119	NA	0	0	0	0.553051	0	0
21ur-9960	WBGene00169973	2.03706	0.61266	NA	0	0	0	1.65915	0	0
21ur-9983	WBGene00172111	1.61916	0.688888	NA	0	0	0	1.1061	0	0
2L52.1	WBGene00007063	-0.0466444	0.982886	0.98793	9.79556	0	14.2124	19.3568	0	3.41451
2RSSE.1	WBGene00007064	0.930185	0.0812583	0.146825	339.906	218.243	221.872	489.45	288.845	705.097
4R79.2	WBGene00007067	2.48547	0.0700734	0.13087	15.6729	0	6.31664	75.768	21.7177	24.7552
aagr-1	WBGene00017071	-1.43203	0.0851036	0.152401	119.506	594.263	143.703	63.6009	62.9812	190.359
aagr-2	WBGene00019895	-3.5471	3.61e-06	2.78e-05	249.787	1310.4	960.918	92.3595	97.7295	26.4625
aagr-3	WBGene00009583	-1.50154	0.00259004	0.00839034	1466.4	2035.04	1559.42	647.623	327.937	808.386
aagr-4	WBGene00018682	-8.64235	1.59e-15	1.15e-13	357.538	1927.34	677.459	1.1061	8.68707	0
aak-1	WBGene00019801	-0.942208	0.104761	0.179718	393.781	168.17	512.437	152.089	225.864	182.676
aak-2	WBGene00020142	2.34431	1.79e-05	0.000112939	678.832	239.973	376.629	1918.53	2923.2	1737.99
aakb-1	WBGene00010115	0.763264	0.121276	0.201229	214.523	267.371	168.18	404.28	245.41	450.716
aakb-2	WBGene00012928	1.04398	0.0260804	0.0583308	238.032	164.391	135.018	311.921	395.262	401.205
aakg-1	WBGene00013732	1.4469	0.00314653	0.00988361	828.704	358.069	431.9	1471.67	1589.73	1351.29
aakg-2	WBGene00020633	0.984888	0.0575921	0.111763	128.322	178.562	285.828	305.284	425.666	443.887
aakg-3	WBGene00021527	2.73685	0.00254368	0.00825641	107.751	13.2268	11.0541	320.77	258.44	298.77
aakg-4	WBGene00020135	1.57572	0.00354987	0.0109646	219.42	89.7536	189.499	558.582	562.488	366.207
aakg-5	WBGene00011276	-0.328211	0.517661	0.617567	139.097	144.55	187.92	142.687	143.337	90.4846
aap-1	WBGene00000001	-0.56668	0.493422	0.594419	151.831	59.5208	110.541	130.52	19.5459	64.8758
aars-1	WBGene00000196	0.0814103	0.911312	0.936966	60.7325	126.6	41.8477	44.7971	93.386	104.996
aars-2	WBGene00000197	-0.913481	0.0287419	0.0633471	1060.86	753.93	690.882	397.644	423.495	508.762
aat-1	WBGene00000002	1.20621	0.118512	0.1976	86.2009	142.661	54.481	254.403	58.6377	338.037
aat-2	WBGene00000003	-0.27495	0.665027	0.7444	95.0169	242.807	144.493	158.726	73.8401	163.897
aat-3	WBGene00000004	2.30528	0.00139287	0.00491689	431.005	96.367	117.647	1283.63	551.629	1349.59
aat-4	WBGene00000005	-8.59828	8.5e-08	1.02e-06	26.448	113.373	75.7996	0	0	0
aat-5	WBGene00000006	3.03711	3.85e-08	5.07e-07	515.246	169.115	226.609	2905.18	2310.76	2258.7
aat-6	WBGene00000007	-4.07562	0.0641701	0.12209	0	100.146	19.7395	6.63661	0	0
aat-8	WBGene00000009	2.21566	0.338783	0.44202	0	6.61342	0	1.1061	15.2024	14.5117
aat-9	WBGene00000010	-1.96888	0.0841399	0.151185	63.6711	217.298	100.277	49.7746	0	46.0959
abce-1	WBGene00012714	-2.42102	1.42e-05	9.27e-05	403.577	380.744	394.79	106.186	76.0119	37.5596
abcf-1	WBGene00006512	-3.34831	3.46e-09	5.95e-08	396.72	957.056	501.383	77.9802	43.4353	58.9004
abcf-2	WBGene00012097	0.0538533	0.907821	0.934229	1930.7	1408.66	2185.56	2023.06	2484.5	1230.08
abcf-3	WBGene00018339	-1.91636	0.000851964	0.00320558	484.88	314.61	457.167	128.861	152.024	53.7786
abch-1	WBGene00016973	-3.77243	0.0776554	0.141654	4.89778	14.1716	10.2645	1.65915	0	0
abcx-1	WBGene00006522	0.991006	0.686463	0.762016	0	0	27.6353	13.8263	0	40.9742
abf-1	WBGene00000012	-2.16233	0.579694	NA	6.85689	0	0	1.1061	0	0
abf-2	WBGene00000013	-3.4894	0.1827	0.273269	0.979556	9.44774	7.10622	1.1061	0	0
abf-4	WBGene00000015	-5.37029	0.121508	0.201573	0	15.1164	7.89579	0	0	0
abf-5	WBGene00000016	-1.48974	0.286855	0.386436	14.6933	51.9626	92.3808	28.7587	28.233	0
abf-6	WBGene00000017	-1.35238	0.032377	0.0698129	158.688	73.6924	124.754	58.6234	47.7789	33.2915
abi-1	WBGene00015146	-1.34086	0.0308918	0.0672182	144.974	111.483	301.619	89.0412	69.4966	61.4612
abl-1	WBGene00000018	0.819569	0.163759	0.252671	200.809	84.0849	193.447	274.313	186.772	381.572
abt-1	WBGene00000019	-7.71219	1.11e-05	7.45e-05	26.448	68.9685	21.3186	0	0	0
abt-2	WBGene00000020	3.0513	1.49e-08	2.19e-07	244.889	141.716	85.2746	1091.72	1585.39	1232.64
abt-3	WBGene00000021	-3.61864	0.358616	NA	6.85689	0	0	0	0	0
abt-4	WBGene00000022	-0.798218	0.263694	0.360489	68.5689	304.217	212.397	80.1924	91.2142	164.75
abt-5	WBGene00000023	-2.81689	0.111892	0.189248	12.7342	39.6805	18.9499	9.40187	0	0
abtm-1	WBGene00022281	1.2523	0.0597558	0.115218	108.731	83.1401	37.8998	158.726	115.104	271.454
abts-1	WBGene00009920	3.2968	1.95e-08	2.76e-07	2051.19	683.072	709.042	9734.25	9249.56	14850.6
abts-2	WBGene00009929	-2.78939	0.0012389	0.0044459	66.6098	62.3551	57.6393	10.508	2.17177	12.8044
abts-3	WBGene00019018	3.19314	4.74e-08	6.1e-07	616.141	205.961	195.026	3519.62	2925.37	2853.68
abts-4	WBGene00019844	-2.4444	6.62e-07	6.36e-06	402.597	325.947	378.998	76.321	43.4353	81.0947
abu-1	WBGene00000024	-10.3575	1.58e-14	9.34e-13	309.54	205.016	215.555	0	0	0
abu-10	WBGene00000033	-9.92226	1.72e-14	1.01e-12	474.105	235.249	322.148	0.553051	0	0
abu-11	WBGene00000034	-8.40472	4.22e-16	3.38e-14	653.364	298.549	224.241	1.65915	2.17177	0
abu-12	WBGene00004127	-9.13562	4.01e-11	1.09e-09	97.9556	286.267	232.136	0	2.17177	0
abu-13	WBGene00004133	-6.31641	1.38e-08	2.04e-07	123.424	1048.7	295.303	6.63661	13.0306	0
abu-14	WBGene00004174	-7.34186	7.2e-21	1.21e-18	2383.26	781.328	582.71	4.97746	15.2024	5.12177
abu-15	WBGene00004099	-11.0037	1.32e-13	6.35e-12	751.319	108.649	282.669	0	0	0
abu-4	WBGene00000027	-6.28182	0.00404774	0.0122647	17.632	17.0059	8.68537	0	0	0
abu-6	WBGene00000029	-9.61903	1.84e-11	5.28e-10	223.339	98.2565	116.068	0	0	0
abu-8	WBGene00000031	-7.60058	8.42e-14	4.28e-12	1564.35	433.651	776.157	0	4.34353	10.2435
AC3.16	WBGene00200016	-1.80112	0.654845	NA	1.95911	0	0	0	0	0
AC3.5	WBGene00007071	-2.58847	0.00086968	0.00325781	165.545	692.52	271.615	68.5783	97.7295	23.048
AC7.3	WBGene00014997	-5.10026	0.163768	0.252671	0	10.3925	8.68537	0	0	0
AC8.2	WBGene00007074	-4.82184	0.216243	0.307796	7.83645	0	7.89579	0	0	0
acbp-1	WBGene00016655	-4.16588	8.18e-13	3.31e-11	1506.56	4785.28	5343.87	239.471	236.723	172.433
acbp-3	WBGene00009818	-3.42751	1.16e-06	1.03e-05	176.32	505.454	146.072	21.569	21.7177	33.2915
acbp-4	WBGene00018949	-5.80239	0.068453	0.128574	0	20.785	10.2645	0	0	0
acbp-5	WBGene00011731	-0.392047	0.758871	0.821332	77.3849	23.6194	37.8998	39.8197	0	64.8758
acbp-6	WBGene00012457	-1.85599	0.0980168	0.170435	92.0782	55.7417	46.5852	23.2281	0	29.0234
acbp-7	WBGene00044603	3.74051	4.35e-07	4.39e-06	35.264	14.1716	15.7916	115.588	473.445	283.405
acc-1	WBGene00010275	3.18863	0.000325271	0.00139016	127.342	6.61342	48.9539	493.322	764.462	409.742
acc-2	WBGene00008280	3.84278	0.000379349	0.00159151	16.6524	15.1164	0	182.507	104.245	165.604
acc-3	WBGene00018880	2.21978	0.00822281	0.0224246	100.894	15.1164	19.7395	173.658	178.085	279.136
acc-4	WBGene00012099	3.60675	1.54e-09	2.89e-08	144.974	34.9567	81.3267	1074.03	1092.4	1014.96
acd-2	WBGene00016066	-2.7748	0.0628172	0.119961	7.83645	42.5148	39.479	3.31831	10.8588	0
acd-3	WBGene00007775	0.962785	0.536485	0.635088	0	25.5089	21.3186	5.53051	17.3741	68.2903
acd-4	WBGene00017879	5.92286	0.0703311	0.131277	0	0	0	4.42441	26.0612	0
acd-5	WBGene00020903	-3.70945	0.0258521	0.057962	31.3458	38.7358	11.8437	5.53051	0	0
acdh-1	WBGene00016943	-5.11014	1.32e-12	5.06e-11	4700.89	12786.6	11366	445.759	317.078	72.5584
acdh-10	WBGene00020366	-0.658985	0.181647	0.27209	496.635	1034.53	622.189	388.795	577.69	399.498
acdh-11	WBGene00012860	-2.7323	1.51e-06	1.29e-05	156.729	328.781	338.73	42.0319	47.7789	34.9988
acdh-12	WBGene00017125	-1.25197	0.0300636	0.0657292	391.822	332.561	411.371	71.8966	184.6	221.943
acdh-13	WBGene00001566	-1.68684	0.00142298	0.005006	125.383	189.9	187.92	55.8582	56.4659	44.3887
acdh-2	WBGene00015894	-5.73767	1.46e-08	2.15e-07	198.85	409.087	430.321	0.553051	2.17177	16.2189
acdh-3	WBGene00019433	-1.34377	0.00159483	0.00549882	609.284	432.707	567.708	175.87	238.894	221.09
acdh-4	WBGene00020419	-3.21676	0.0232005	0.0531767	13.7138	26.4537	54.481	1.1061	0	8.53628
acdh-5	WBGene00016491	-5.57846	0.00015604	0.000736968	38.2027	42.5148	28.4249	1.65915	0	0
acdh-6	WBGene00015335	-2.4874	0.00406863	0.0123147	109.71	229.58	116.858	7.74272	58.6377	17.9262
acdh-7	WBGene00020812	-0.600075	0.34354	0.446862	401.618	802.113	413.74	292.011	605.923	172.433
acdh-8	WBGene00019406	-3.10262	0.0386638	0.0808672	52.896	114.318	83.6954	0.553051	30.4047	0
acdh-9	WBGene00017874	-1.47172	0.0264712	0.0590762	521.124	619.772	746.153	263.252	351.826	67.4366
ace-1	WBGene00000035	1.95376	0.0170511	0.0411223	12.7342	15.1164	11.8437	79.0863	30.4047	42.6814
ace-2	WBGene00000036	2.29135	0.000340828	0.00144937	382.027	87.864	134.229	1014.85	1070.68	870.701
ace-3	WBGene00000037	4.95074	6.13e-10	1.26e-08	226.277	21.7298	47.3748	2927.3	2881.94	3317.2
ace-4	WBGene00000038	3.51603	0.00382819	0.0116899	24.4889	5.66865	0	97.89	73.8401	170.726
acin-1	WBGene00016601	-1.6671	0.000661846	0.00256535	895.314	1718.54	818.794	300.307	393.09	388.401
acl-1	WBGene00010339	-1.5699	0.0626823	0.119773	40.1618	251.31	188.709	80.7455	23.8894	55.4858
acl-11	WBGene00017888	0.57485	0.401595	0.505257	89.1396	53.8521	34.7415	56.9643	119.447	89.631
acl-12	WBGene00015295	0.0739702	0.911699	0.937224	138.117	387.358	101.066	210.712	173.741	274.015
acl-13	WBGene00008581	-5.0839	0.0156806	0.0383848	0	56.6865	71.0622	3.31831	0	0
acl-14	WBGene00019465	0.23584	0.626744	0.712849	450.596	228.635	371.892	333.49	501.678	404.62
acl-2	WBGene00011543	-2.15605	0.00840769	0.0228417	71.5076	376.02	206.08	57.5173	17.3741	69.9975
acl-3	WBGene00006491	-2.38964	0.000500034	0.00201904	61.712	126.6	101.856	20.4629	21.7177	13.6581
acl-4	WBGene00018657	1.92111	5.24e-06	3.84e-05	151.831	160.612	185.551	533.141	781.836	574.492
acl-5	WBGene00011106	0.16929	0.829504	0.875937	43.1005	151.164	32.3728	75.2149	80.3554	99.0209
acl-6	WBGene00017261	-1.1801	0.128198	0.20992	69.5485	166.28	292.934	80.1924	121.619	33.2915
acl-7	WBGene00012911	-1.97701	0.0294587	0.0646417	26.448	277.764	311.094	51.4337	76.0119	29.877
acl-8	WBGene00020264	0.530326	0.372344	0.476066	88.16	200.292	80.5371	174.211	152.024	205.724
acl-9	WBGene00022646	-0.760729	0.245324	0.339239	142.036	355.235	306.357	210.159	69.4966	192.066
acly-1	WBGene00206384	2.03706	0.61266	NA	0	0	0	1.65915	0	0
acly-2	WBGene00007150	-2.89732	6.89e-10	1.41e-08	367.333	309.886	329.255	52.5399	45.6071	36.706
acn-1	WBGene00000039	-7.21001	4.81e-10	1.02e-08	182.197	1438.89	464.273	0.553051	15.2024	0.853628
aco-1	WBGene00000040	-1.75834	0.000106508	0.000529004	698.423	1103.5	1307.54	331.831	251.925	333.769
aco-2	WBGene00000041	-0.244571	0.473454	0.576059	2903.4	2660.48	2609.56	2364.29	2397.63	2137.49
acox-1	WBGene00008564	-0.897054	0.442025	0.545608	22.5298	268.316	144.493	39.2666	6.5153	186.945
acp-1	WBGene00022770	0.0380836	0.955887	0.969083	32.3253	47.2387	34.7415	31.5239	45.6071	40.9742
acp-2	WBGene00008802	-0.755696	0.373342	0.476984	41.1413	179.507	77.3788	34.2892	34.7483	106.704
acp-3	WBGene00008801	-6.2786	0.0315964	0.0684977	0	27.3985	15.7916	0	0	0
acp-4	WBGene00008804	3.39369	0.0351703	0.0747773	0	20.785	0	112.822	58.6377	46.0959
acp-5	WBGene00017427	-2.09188	0.0150552	0.0370689	25.4685	134.158	63.9559	17.1446	17.3741	17.9262
acp-6	WBGene00022245	0.569697	0.1888	0.279862	1467.37	1185.69	1826.3	2726.54	2317.28	1604.82
acp-7	WBGene00022246	-4.5892	0.000723038	0.00276669	44.08	124.71	84.485	9.40187	0	0
acr-10	WBGene00000049	-2.33224	0.545077	0.642497	12.7342	0	0	2.2122	0	0
acr-11	WBGene00000050	2.05634	0.315254	0.417177	0	0	9.47495	14.9324	17.3741	7.68265
acr-12	WBGene00000051	2.60655	0.000647574	0.00251813	160.647	26.4537	33.9519	490.556	423.495	430.229
acr-14	WBGene00000053	3.18972	0.0100116	0.0264863	11.7547	15.1164	0	112.269	28.233	102.435
acr-15	WBGene00000054	2.6301	2.2e-06	1.79e-05	61.712	35.9014	36.3207	206.841	373.544	250.113
acr-16	WBGene00000055	2.66129	0.000556921	0.00221771	53.8756	23.6194	8.68537	211.266	138.993	192.066
acr-17	WBGene00000056	1.87375	0.037838	0.0794429	34.2845	60.4656	12.6333	247.214	102.073	42.6814
acr-18	WBGene00000057	1.90775	0.00196229	0.00659037	55.8347	107.704	43.4269	311.368	158.539	303.892
acr-19	WBGene00000058	2.74203	0.000152501	0.000722533	97.9556	57.6312	19.7395	534.8	206.318	427.668
acr-2	WBGene00000042	3.3554	5.4e-05	0.000295216	95.0169	9.44774	20.5291	382.158	460.415	434.497
acr-20	WBGene00000059	2.81138	0.00239947	0.00785656	125.383	19.8403	9.47495	323.535	510.365	250.967
acr-21	WBGene00000060	3.34918	1.17e-05	7.78e-05	61.712	27.3985	7.89579	358.377	256.269	369.621
acr-23	WBGene00000062	3.05862	0.00140256	0.0049458	42.1209	1.88955	13.4229	146.559	145.508	185.237
acr-24	WBGene00013534	2.33058	0.000420333	0.00173862	96.976	51.9626	32.3728	400.962	160.711	346.573
acr-25	WBGene00043066	-1.70946	0.657151	NA	9.79556	0	0	2.76526	0	0
acr-3	WBGene00000043	2.24309	0.0217589	0.0504275	3.91822	32.1223	8.68537	76.321	41.2636	93.0455
acr-5	WBGene00000044	3.74481	0.000577612	0.00229012	44.08	0	22.1082	256.616	280.158	349.988
acr-6	WBGene00000045	0.848129	0.578285	0.671713	4.89778	0	45.7956	25.4403	43.4353	23.048
acr-7	WBGene00000046	-0.824927	0.828109	0.875025	0	0	11.0541	6.08356	0	0
acr-8	WBGene00000047	2.29234	0.0846838	0.151847	32.3253	22.6746	0	117.247	21.7177	128.898
acr-9	WBGene00000048	1.9644	0.0148928	0.0367407	27.4276	39.6805	11.0541	139.922	45.6071	116.947
acs-1	WBGene00018488	0.526651	0.164163	0.253159	653.364	601.821	782.473	934.103	1101.09	902.285
acs-10	WBGene00007082	-3.83227	5.98e-05	0.000320557	44.08	69.9133	124.754	5.53051	10.8588	1.70726
acs-11	WBGene00018269	-0.830329	0.174074	0.264113	113.628	189.9	328.465	93.4656	156.367	107.557
acs-12	WBGene00009106	-0.0232556	0.976717	0.983251	59.7529	27.3985	34.7415	45.9032	19.5459	52.925
acs-13	WBGene00022037	0.421683	0.338353	0.441633	436.882	627.33	585.078	649.835	968.608	594.125
acs-14	WBGene00008669	-0.598575	0.437293	0.540806	47.0187	174.783	233.716	95.1248	54.2942	150.239
acs-16	WBGene00018579	-0.692122	0.458024	0.560811	216.482	32.1223	43.4269	56.4112	95.5578	29.877
acs-17	WBGene00016716	-0.231612	0.737365	0.805068	118.526	537.577	174.497	266.018	260.612	180.969
acs-18	WBGene00011173	-7.90867	0.000149491	0.000710031	0.979556	86.9192	45.7956	0	0	0
acs-19	WBGene00007969	1.56132	1.59e-05	0.000101845	1168.61	982.565	1114.89	2746.45	3383.61	3510.12
acs-2	WBGene00009221	-0.248629	0.576675	0.670315	1060.86	717.084	1212	636.009	883.909	997.891
acs-20	WBGene00009218	-4.52567	7.87e-06	5.52e-05	150.852	459.16	216.345	29.3117	2.17177	2.56088
acs-21	WBGene00016849	1.13823	0.31893	0.421198	30.3662	17.0059	10.2645	45.3502	78.1836	4.26814
acs-22	WBGene00017012	-2.16015	0.00759538	0.0209955	117.547	386.413	257.403	64.707	13.0306	90.4846
acs-3	WBGene00020343	-1.61039	0.209124	0.30126	92.0782	159.667	57.6393	47.5624	54.2942	0
acs-4	WBGene00018152	-0.201671	0.59988	0.690018	1076.53	931.548	808.529	778.143	940.375	732.413
acs-5	WBGene00013575	-2.55713	0.000260686	0.00114618	99.9147	385.468	152.389	40.9258	34.7483	32.4379
acs-6	WBGene00022849	-6.93188	3.84e-05	0.000219468	10.7751	70.8581	46.5852	0.553051	0	0
acs-7	WBGene00007228	1.3025	0.203235	0.295025	6.85689	68.0238	9.47495	53.0929	73.8401	81.0947
acs-9	WBGene00020634	-1.40476	0.711496	0.783041	0	15.1164	0	5.53051	0	0
act-1	WBGene00000063	-2.22566	0.00696284	0.0194949	3268.78	5310.58	4974.35	2182.89	171.57	540.347
act-2	WBGene00000064	-1.78752	0.000108583	0.000538171	4748.89	4759.77	4630.09	948.483	1107.6	2038.46
act-3	WBGene00000065	-1.79307	0.034307	0.0732922	3482.32	4355.41	4577.19	2742.03	175.913	661.562
act-4	WBGene00000066	-1.5869	0.000634492	0.0024786	30470.1	20881.4	23599	11964.2	7288.45	5695.41
act-5	WBGene00000067	-1.99604	0.000422951	0.00174812	1831.77	6774.98	4908.82	1199.01	992.498	1195.93
acy-1	WBGene00000068	3.14329	8.1e-07	7.53e-06	330.11	73.6924	124.754	1775.85	1639.68	1252.27
acy-2	WBGene00000069	3.31352	1.33e-05	8.76e-05	130.281	34.0119	18.1603	662.555	486.476	660.708
acy-3	WBGene00000070	1.32682	0.0387421	0.0810102	80.3236	67.079	33.9519	216.243	134.65	102.435
acy-4	WBGene00000071	2.46699	8.84e-06	6.12e-05	28.4071	45.3492	28.4249	168.128	236.723	161.336
ada-2	WBGene00017967	0.193679	0.694218	0.768706	214.523	272.095	228.978	205.735	390.918	225.358
adbp-1	WBGene00012157	-1.59494	0.100582	0.174	89.1396	153.053	120.016	60.2826	2.17177	55.4858
add-1	WBGene00000072	3.01692	1.1e-08	1.68e-07	98.9351	38.7358	78.1684	534.247	675.42	538.639
add-2	WBGene00000073	-1.00736	0.149375	0.235682	86.2009	113.373	123.964	47.5624	91.2142	24.7552
adm-2	WBGene00000074	0.817663	0.13925	0.223436	201.788	175.728	95.5391	228.963	386.575	220.236
adm-4	WBGene00000075	0.0183003	0.986016	0.990411	31.3458	38.7358	44.2165	29.8648	4.34353	80.2411
ador-1	WBGene00011878	2.22705	NA	NA	505.451	49.1283	33.1623	993.833	718.855	1037.16
adpr-1	WBGene00044440	0.229201	0.772709	0.832584	43.1005	19.8403	54.481	61.3887	49.9506	26.4625
adr-1	WBGene00000079	1.08316	0.0277415	0.0614921	475.085	241.862	292.934	519.868	842.646	778.509
adr-2	WBGene00000080	-3.8909	0.000579187	0.00229582	78.3645	88.8088	60.008	1.65915	0	12.8044
ads-1	WBGene00000081	-0.879844	0.139363	0.223588	279.173	901.315	871.696	282.056	475.617	359.378
adsl-1	WBGene00011064	-1.81067	0.000852724	0.00320771	213.543	373.186	419.267	129.414	78.1836	77.6802
adss-1	WBGene00016509	0.217059	0.670854	0.749596	1918.95	1258.44	2200.56	2373.7	2716.88	1162.64
adt-1	WBGene00000082	-2.15664	0.0122684	0.0313232	68.5689	102.98	242.401	22.6751	10.8588	58.0467
adt-2	WBGene00000083	-1.44315	0.0661708	0.12503	192.972	438.375	358.469	179.189	160.711	24.7552
aex-1	WBGene00000084	-1.35713	0.267319	0.364656	10.7751	58.576	14.2124	13.2732	2.17177	16.2189
aex-2	WBGene00000085	2.81753	0.000949706	0.00352305	72.4871	42.5148	5.52706	319.11	199.803	327.793
aex-3	WBGene00000086	3.18447	3.81e-05	0.000217839	508.389	65.1894	101.856	1976.6	2323.79	1837.86
aex-4	WBGene00006454	-1.65153	0.309951	0.411716	1.95911	13.2268	45.006	9.95492	0	8.53628
aex-5	WBGene00000088	1.52533	0.0105017	0.0275347	51.9165	54.7969	91.5912	113.375	238.894	221.09
aex-6	WBGene00000089	2.94792	0.000475215	0.0019345	622.018	47.2387	122.385	1888.67	2160.91	2057.24
aexr-1	WBGene00016089	1.57928	0.562664	0.658169	10.7751	0	0	12.7202	19.5459	0
aexr-2	WBGene00016090	1.03444	0.683761	0.759837	5.87733	0	3.15832	16.0385	2.17177	0
aexr-3	WBGene00016748	3.2784	4.13e-05	0.000233669	23.5093	18.8955	3.9479	169.787	97.7295	178.408
afd-1	WBGene00021009	-0.327813	0.429328	0.533256	1026.57	753.93	663.247	697.95	701.481	548.029
aff-1	WBGene00016625	-2.9459	0.00696367	0.0194949	64.6507	47.2387	71.0622	5.53051	0	17.0726
afmd-1	WBGene00017051	-1.66356	0.18988	0.281247	5.87733	58.576	19.7395	13.2732	2.17177	10.2435
age-1	WBGene00000090	1.16737	0.0195113	0.0460621	107.751	71.8029	99.487	169.787	258.44	200.603
agef-1	WBGene00012386	-0.172132	0.692018	0.766785	252.725	219.188	277.932	261.593	193.287	209.139
agl-1	WBGene00011050	1.7132	0.000423972	0.00175103	542.674	371.296	461.114	1005.45	2202.17	1305.2
agmo-1	WBGene00007210	-8.80544	3.37e-13	1.49e-11	154.77	853.131	196.605	1.1061	2.17177	0
agr-1	WBGene00018304	2.94205	2.1e-05	0.000129788	47.9982	47.2387	111.331	404.28	936.032	252.674
ags-3	WBGene00000092	2.92143	1.07e-08	1.64e-07	626.916	241.862	318.201	2593.26	3394.47	3003.92
agt-1	WBGene00000093	-4.5431	6.86e-05	0.000361142	91.0987	139.827	141.335	12.7202	2.17177	0
agt-2	WBGene00000094	0.295167	0.825894	0.873501	28.4071	73.6924	68.6934	33.7361	0	174.994
AH6.3	WBGene00007081	-10.6842	1.79e-13	8.38e-12	143.995	582.926	188.709	0	0	0
AH9.1	WBGene00014998	2.8105	0.0185921	0.0442983	14.6933	0	32.3728	162.597	67.3248	100.728
AH9.3	WBGene00014999	0.660383	0.261174	0.357728	69.5485	60.4656	67.9038	64.707	115.104	134.02
AH9.4	WBGene00015000	7.07906	1.01e-09	1.97e-08	2.93867	0	0	122.224	128.134	124.63
AH9.6	WBGene00044701	4.23984	1.19e-09	2.28e-08	160.647	36.8462	32.3728	1352.21	1468.11	1516.04
AH9.7	WBGene00175029	4.4839	0.254488	NA	0	0	0	3.31831	0	7.68265
AH9.9	WBGene00219776	5.96325	0.0551177	0.107978	0	0	0	18.8037	0	11.9508
aha-1	WBGene00000095	2.51798	7.93e-05	0.000409715	152.811	34.0119	123.964	626.054	649.358	505.348
ahcy-1	WBGene00019322	-3.90104	1.58e-15	1.15e-13	10532.2	20801.1	25385.8	1394.24	1409.48	993.623
aho-3	WBGene00045192	0.711182	0.33234	0.435648	443.739	81.2506	225.82	441.335	206.318	579.614
ahr-1	WBGene00000096	-2.99935	6.62e-06	4.72e-05	680.791	947.609	577.972	152.089	93.386	29.877
ain-1	WBGene00015547	2.50038	6.1e-06	4.4e-05	897.273	259.813	474.537	2933.38	3116.49	3181.47
ain-2	WBGene00015007	0.821364	0.059615	0.114994	977.597	506.399	715.359	1205.65	1385.59	1295.81
aip-1	WBGene00000097	-0.100728	0.862678	0.901477	495.655	271.15	260.561	210.159	243.238	503.641
aipl-1	WBGene00010685	-2.71972	1.34e-06	1.16e-05	356.558	334.45	340.309	68.0253	23.8894	61.4612
air-1	WBGene00000098	-4.98739	1.11e-05	7.45e-05	163.586	255.089	306.357	19.3568	2.17177	0
air-2	WBGene00000099	-7.6454	1.22e-07	1.4e-06	47.0187	84.0849	80.5371	0.553051	0	0
ajm-1	WBGene00000100	-0.727315	0.11615	0.194437	1602.55	1995.36	2065.54	1020.38	1635.34	769.119
aka-1	WBGene00000101	0.219464	0.716995	0.788143	105.792	131.324	310.305	192.462	193.287	251.82
akap-1	WBGene00016977	2.27278	0.00016377	0.00077016	3610.64	944.774	1235.69	8836.1	8904.25	10243.5
akir-1	WBGene00017088	0.590117	0.136351	0.219986	396.72	405.308	411.371	680.253	482.132	661.562
akt-1	WBGene00000102	2.24826	4.19e-05	0.000236365	877.682	362.793	467.431	2646.9	3741.95	1726.89
akt-2	WBGene00000103	3.11808	2.1e-09	3.81e-08	267.419	98.2565	246.349	1584.49	1837.32	1893.35
aldo-1	WBGene00011474	1.87886	0.00125598	0.00450127	8320.35	2921.24	3681.02	11937.1	26376.1	16571.5
aldo-2	WBGene00017166	-1.53972	0.0100835	0.0266634	3601.83	7597.88	9531.8	3246.96	2762.49	1121.67
alfa-1	WBGene00017547	-1.87501	0.00608002	0.0173248	80.3236	149.274	108.962	34.2892	15.2024	40.9742
alg-1	WBGene00000105	2.43837	0.000110649	0.00054742	658.261	189.9	293.724	1869.31	1250.94	3066.23
alg-2	WBGene00000106	0.704323	0.190652	0.282009	395.741	183.286	166.601	426.955	443.041	344.866
alg-3	WBGene00011910	-6.26317	1.14e-05	7.63e-05	7.83645	138.882	89.2225	1.65915	0	0.853628
alg-4	WBGene00006449	-7.32605	4.3e-09	7.2e-08	62.6916	199.347	117.647	1.65915	0	0
alh-1	WBGene00000107	-1.22422	0.0164242	0.0398376	1121.59	1625.01	1812.87	690.208	896.94	367.06
alh-10	WBGene00000116	-2.58341	0.0296384	0.0649463	95.0169	101.091	149.231	23.7812	34.7483	0
alh-11	WBGene00000117	1.26016	0.0374233	0.0787346	143.015	93.5327	51.3227	206.288	308.391	175.847
alh-12	WBGene00000118	-1.59222	0.0159591	0.0389159	298.765	1008.07	679.038	325.747	225.864	106.704
alh-13	WBGene00011938	-5.7808	2.45e-08	3.39e-07	175.34	530.963	135.808	8.84882	6.5153	0
alh-2	WBGene00000108	2.3444	0.558942	NA	0	0	0	2.2122	0	0
alh-3	WBGene00000109	-0.17265	0.775135	0.834269	179.259	475.222	236.874	266.018	362.685	163.897
alh-4	WBGene00000110	-1.8639	0.00568476	0.0163601	734.667	883.364	1269.64	351.187	369.2	74.2657
alh-5	WBGene00000111	-0.193832	0.749405	0.81398	55.8347	62.3551	66.3247	51.4337	69.4966	41.8278
alh-6	WBGene00000112	1.27277	0.00423006	0.0127188	766.992	497.896	799.844	1575.09	2126.16	1290.69
alh-7	WBGene00000113	-0.211194	0.755124	0.818124	1603.53	389.247	457.956	555.816	992.498	570.224
alh-8	WBGene00000114	-1.10694	0.0600308	0.115606	5243.56	7757.54	10450.1	5035.53	4360.91	1492.14
alh-9	WBGene00000115	-3.69558	3.21e-07	3.33e-06	505.451	721.808	1032.77	109.504	45.6071	17.9262
alkb-8	WBGene00007581	-0.664519	0.406793	0.510385	121.465	44.4044	140.545	86.829	21.7177	82.8019
alp-1	WBGene00001132	-1.69695	0.00147066	0.00514402	1165.67	787.942	1020.14	324.088	438.697	157.068
alr-1	WBGene00044330	2.71783	0.00066705	0.00258127	228.237	32.1223	52.1122	971.158	410.464	670.952
alx-1	WBGene00007010	-0.3829	0.362798	0.465997	569.122	504.51	424.004	466.222	362.685	318.403
aly-1	WBGene00000120	-0.270528	0.590653	0.681938	207.666	131.324	182.393	113.375	143.337	175.847
aly-2	WBGene00000121	-2.27709	3.62e-05	0.00020814	303.662	402.474	334.782	52.5399	49.9506	110.972
aly-3	WBGene00000122	1.14705	0.00395961	0.0120399	688.628	564.975	584.289	1043.05	1509.38	1519.46
ama-1	WBGene00000123	1.01498	0.0708018	0.131931	801.277	233.359	504.541	1142.05	1072.85	895.456
aman-1	WBGene00018877	-8.06096	2.42e-12	8.79e-11	952.128	144.55	389.263	4.42441	0	0
aman-2	WBGene00010284	-2.01686	0.00023233	0.0010391	634.752	1754.45	919.86	289.246	204.146	322.672
aman-3	WBGene00018594	0.441287	0.45605	0.558893	53.8756	111.483	70.2726	129.414	86.8707	102.435
ampd-1	WBGene00016415	1.61163	0.000235994	0.00105292	885.518	530.963	993.291	2716.03	2571.37	2077.73
amph-1	WBGene00010272	-0.269651	0.559982	0.65587	303.662	377.91	275.563	259.934	195.459	336.33
amt-1	WBGene00000133	-2.74854	0.219938	0.311975	0	83.1401	50.5331	0	0	19.6335
amt-2	WBGene00000134	6.73651	3.23e-09	5.62e-08	4.89778	0	0	130.52	238.894	133.166
amt-3	WBGene00000135	2.75273	0.000267686	0.00117206	205.707	53.8521	28.4249	689.655	671.076	577.906
amt-4	WBGene00000136	-1.3455	0.129376	0.211344	52.896	429.872	105.804	79.0863	36.92	114.386
amx-1	WBGene00000137	0.242208	0.797467	0.852061	77.3849	16.0612	52.1122	67.4722	15.2024	87.9237
amx-2	WBGene00000138	-0.576491	0.212613	0.304659	265.46	308.941	296.092	243.896	138.993	198.042
amx-3	WBGene00000139	-3.40954	0.0767375	0.140509	8.816	37.791	6.31664	4.42441	0	0
anat-1	WBGene00015938	2.31985	4.92e-08	6.28e-07	260.562	237.138	225.03	970.605	1600.59	1040.57
anc-1	WBGene00000140	-0.593465	0.303964	0.405499	228.237	741.648	476.906	370.544	340.967	247.552
angl-1	WBGene00020955	-0.151288	0.811941	0.863488	122.444	105.815	56.8497	87.3821	115.104	55.4858
ani-1	WBGene00013038	-2.22382	0.00034327	0.00145912	207.666	271.15	383.736	45.3502	104.245	38.4133
ani-2	WBGene00019608	-3.01673	5.76e-05	0.000311759	160.647	174.783	315.832	13.2732	54.2942	16.2189
ani-3	WBGene00012835	-4.17867	0.000121232	0.00059353	133.22	68.9685	118.437	6.08356	13.0306	0
anmt-1	WBGene00015124	-1.36962	0.309421	0.411178	50.9369	2.83432	33.9519	4.42441	4.34353	24.7552
anmt-2	WBGene00018340	-3.93017	0.000704283	0.00270309	786.583	270.205	353.732	59.7295	32.5765	0
anmt-3	WBGene00011573	-1.53136	0.0315915	0.0684977	363.415	244.697	309.515	176.423	110.76	29.877
anoh-1	WBGene00010138	3.64219	2.61e-07	2.77e-06	10.7751	17.9507	33.9519	167.021	425.666	196.335
anoh-2	WBGene00013326	2.93687	6.8e-06	4.83e-05	113.628	23.6194	69.483	454.608	645.015	484.007
anr-1	WBGene00219738	0.0895926	0.982434	NA	0.979556	0	0	0.553051	0	0
anr-11	WBGene00219597	1.27791	0.753072	NA	0	0	0	0	0	0.853628
anr-16	WBGene00219587	-2.88032	0.34561	0.448695	0	14.1716	4.73748	2.2122	0	0
anr-18	WBGene00219715	-1.19356	0.757292	NA	6.85689	0	0	2.76526	0	0
anr-2	WBGene00219623	-2.89465	0.369257	0.47267	6.85689	8.50297	0	1.65915	0	0
anr-20	WBGene00219581	-5.521	0.000810504	0.00306572	19.5911	27.3985	28.4249	1.1061	0	0
anr-23	WBGene00219717	3.37306	0.395127	NA	0	0	0	4.97746	0	0
anr-24	WBGene00219751	1.61916	0.688888	NA	0	0	0	1.1061	0	0
anr-27	WBGene00219647	4.80526	0.221363	0.313241	0	0	0	11.6141	2.17177	0
anr-29	WBGene00219638	-3.78834	0.336048	NA	2.93867	0	4.73748	0	0	0
anr-3	WBGene00219627	-0.269848	0.943532	NA	0	7.5582	0	6.08356	0	0
anr-32	WBGene00219683	-5.53625	0.0570055	0.110936	0.979556	1.88955	22.8978	0	0	0
anr-33	WBGene00219668	-4.22148	0.282736	NA	0	10.3925	0	0	0	0
anr-34	WBGene00219701	4.98103	0.203538	0.29536	0	0	0	4.97746	10.8588	0
anr-35	WBGene00219589	0.609893	0.577612	0.671215	8.816	6.61342	21.3186	16.5915	30.4047	10.2435
anr-36	WBGene00219659	7.2324	0.000146514	0.000700625	0	0	0	12.1671	30.4047	32.4379
anr-4	WBGene00219671	-0.0340783	0.993057	NA	0	2.83432	0	1.65915	0	0.853628
anr-42	WBGene00219766	-1.7964	0.640786	NA	0	10.3925	0	2.76526	0	0
anr-43	WBGene00219583	2.03706	0.61266	NA	0	0	0	1.65915	0	0
anr-44	WBGene00219729	1.07528	0.78928	NA	0	0.944774	0	1.65915	0	0
anr-45	WBGene00219710	-0.409542	0.840055	0.884637	40.1618	0	14.2124	11.061	30.4047	0
anr-47	WBGene00219764	-3.13148	0.42859	NA	4.89778	0	0	0	0	0
anr-48	WBGene00219656	3.22825	0.320256	0.422606	1.95911	0	0	1.1061	17.3741	0
anr-51	WBGene00219610	-1.80112	0.654845	NA	1.95911	0	0	0	0	0
anr-52	WBGene00219642	-3.34572	0.39688	NA	0	5.66865	0	0	0	0
anr-57	WBGene00219603	-5.31888	0.12864	0.21046	12.7342	0	9.47495	0	0	0
anr-6	WBGene00219681	2.58794	0.518014	NA	0	0	0	2.76526	0	0
anr-7	WBGene00219607	5.28719	0.149523	0.235776	0	0	0	2.2122	0	17.0726
anr-8	WBGene00219575	1.25045	0.547245	0.64442	0	0.944774	30.004	28.2056	0	45.2423
anr-9	WBGene00219568	-2.10845	0.598649	NA	0	0	2.36874	0	0	0
ant-1.1	WBGene00006439	-0.647068	0.141743	0.22653	24301.8	27897.3	36321.4	23231.5	20683.9	12612.4
ant-1.3	WBGene00010485	-5.88182	2.36e-06	1.91e-05	63.6711	280.598	116.068	6.63661	0	0
ant-1.4	WBGene00020140	-8.18516	3.07e-09	5.34e-08	91.0987	136.048	81.3267	0.553051	0	0
aos-1	WBGene00000142	0.0301994	0.959629	0.97138	244.889	162.501	117.647	158.726	110.76	264.625
apa-2	WBGene00000161	2.75691	4.01e-06	3.04e-05	751.319	198.403	649.034	2601.55	4239.29	3967.66
apb-1	WBGene00000160	2.2709	5.66e-06	4.11e-05	931.558	436.486	467.431	2403.01	3781.05	2675.27
apb-3	WBGene00000163	-0.825026	0.144687	0.22999	1088.29	1787.51	1023.3	582.916	1200.99	420.839
apc-10	WBGene00000144	-6.6505	2.78e-05	0.000165949	47.0187	24.5641	40.2686	0	0	0.853628
apc-11	WBGene00000145	-1.76617	0.184979	0.275626	27.4276	148.33	92.3808	44.2441	34.7483	0
apc-17	WBGene00007501	3.60808	0.361966	NA	0	0	0	3.87136	2.17177	0
apc-2	WBGene00000143	-0.167721	0.847682	0.890297	36.2436	111.483	115.279	63.6009	149.852	23.048
apd-3	WBGene00000162	0.759305	0.113335	0.190903	1001.11	1902.78	896.173	1947.85	2549.65	1936.03
ape-1	WBGene00000146	0.274734	0.612114	0.700861	289.949	251.31	625.347	400.962	566.831	445.594
apg-1	WBGene00000158	0.607808	0.221674	0.313524	669.037	313.665	445.323	704.587	553.801	915.943
aph-1	WBGene00000147	0.745803	0.125834	0.207017	113.628	97.3118	84.485	183.06	134.65	175.847
aph-2	WBGene00000148	0.482917	0.439442	0.543071	47.9982	104.87	141.335	152.089	106.417	151.946
apl-1	WBGene00000149	2.11172	1.21e-05	8.07e-05	4430.53	2713.39	1936.05	11089.8	16329.5	11825.3
apm-1	WBGene00000150	-3.00247	6.64e-08	8.2e-07	287.989	714.249	568.497	81.2985	62.9812	51.2177
apm-3	WBGene00000164	1.75871	0.0029933	0.00947567	102.853	49.1283	93.96	261.593	173.741	395.23
apn-1	WBGene00000151	-0.659294	0.348484	0.451668	70.528	226.746	192.657	111.163	147.68	52.925
app-1	WBGene00000155	-3.05206	2.31e-06	1.87e-05	344.804	427.038	457.167	70.7905	60.8095	17.0726
apr-1	WBGene00000156	2.38375	1.61e-05	0.000102851	82.2827	50.073	105.014	345.104	310.563	583.028
aps-1	WBGene00000159	-1.13239	0.0199313	0.0468318	312.478	342.008	402.686	188.59	102.073	188.652
aps-2	WBGene00000157	1.62689	0.000728584	0.00278402	399.659	205.016	243.98	674.169	1042.45	905.7
aps-3	WBGene00000165	-0.853303	0.150633	0.23719	1650.55	519.626	802.213	535.906	369.2	738.388
apt-9	WBGene00000166	3.12115	8.13e-06	5.69e-05	161.627	34.0119	43.4269	637.115	573.347	866.433
aptf-1	WBGene00019424	5.31435	3.84e-08	5.06e-07	7.83645	0	6.31664	253.85	221.52	89.631
aptf-2	WBGene00013383	0.472118	0.753838	0.817176	2.93867	8.50297	40.2686	19.9098	52.1224	0.853628
aptf-3	WBGene00009203	-1.15867	0.394854	0.498492	25.4685	15.1164	26.8457	7.18966	0	22.1943
aptf-4	WBGene00009202	1.68534	0.02482	0.0560913	26.448	11.3373	16.5812	47.0093	69.4966	58.9004
apx-1	WBGene00000168	-3.51734	0.00018678	0.000862102	127.342	96.367	91.5912	8.84882	0	17.0726
apy-1	WBGene00017244	-2.77045	0.000487028	0.00197427	186.116	1336.86	735.098	46.4563	165.054	121.215
aqp-1	WBGene00000169	-1.13439	0.1105	0.187414	94.0374	387.358	316.621	95.6778	78.1836	188.652
aqp-10	WBGene00000178	-4.31292	3.84e-10	8.39e-09	469.207	1253.72	1530.99	95.1248	36.92	29.877
aqp-11	WBGene00000179	-3.5124	3.03e-06	2.37e-05	146.933	1013.74	488.75	64.707	43.4353	35.8524
aqp-12	WBGene00013272	4.51375	0.0483061	0.096836	2.93867	0	0	28.7587	0	36.706
aqp-2	WBGene00000170	1.98498	0.00025713	0.00113369	1334.15	889.977	652.193	5233.52	2024.09	4123.88
aqp-3	WBGene00000171	-3.73236	0.340115	0.443511	13.7138	0	0	0.553051	0	0
aqp-4	WBGene00000172	-3.3369	0.00939928	0.0251293	30.3662	298.549	111.331	18.2507	26.0612	0
aqp-5	WBGene00000173	2.63855	0.0367271	0.0774809	16.6524	0	20.5291	127.202	78.1836	26.4625
aqp-6	WBGene00000174	2.48382	0.0518549	0.102612	9.79556	30.2328	0	54.199	106.417	63.1685
aqp-7	WBGene00000175	0.508541	0.225906	0.317657	2640.88	2764.41	2215.56	2629.76	3455.28	4756.42
aqp-8	WBGene00000176	-6.76746	1.5e-08	2.2e-07	133.22	730.311	433.479	10.508	0	0
aqp-9	WBGene00000177	-1.48954	0.341635	0.444893	21.5502	143.606	13.4229	54.199	8.68707	0
arc-1	WBGene00000180	1.2364	0.0200356	0.0469963	89.1396	209.74	120.016	306.39	301.876	378.157
ard-1	WBGene00000181	-1.9081	2.79e-05	0.000166569	888.457	1321.74	1239.64	266.571	416.979	239.016
arf-1.1	WBGene00000190	-9.73452	6.16e-12	2.01e-10	92.0782	175.728	206.08	0	0	0
arf-1.2	WBGene00000182	-0.486346	0.224518	0.316527	2380.32	2547.11	2938.81	2089.98	1372.56	2149.44
arf-3	WBGene00000183	-1.49805	0.000776791	0.00295245	2500.81	2772.91	2476.91	1213.39	579.862	946.674
arf-6	WBGene00000184	0.603729	0.238583	0.331589	234.114	195.568	229.768	344.551	195.459	459.252
arg-1	WBGene00000185	-2.67823	0.491554	NA	9.79556	0	0	1.1061	0	0
ari-1	WBGene00016158	-0.244025	0.593422	0.68427	256.644	346.732	234.505	276.526	188.944	239.87
arid-1	WBGene00044689	2.1027	0.00013454	0.000650554	200.809	77.4715	161.074	526.505	840.474	522.421
ark-1	WBGene00000186	0.599027	0.131273	0.213721	226.277	255.089	279.511	408.705	375.716	367.914
arl-1	WBGene00000187	0.302552	0.587908	0.679531	168.484	289.101	191.078	213.478	180.257	404.62
arl-13	WBGene00021349	2.91973	0.000349643	0.00148429	4.89778	22.6746	22.1082	120.012	186.772	71.7048
arl-5	WBGene00000189	-1.31786	0.276355	0.374799	34.2845	41.5701	82.9058	21.569	0	40.9742
arl-6	WBGene00000193	3.82768	0.00144489	0.00506356	21.5502	0	3.15832	73.5558	152.024	123.776
arl-7	WBGene00000191	-3.85218	0.158807	0.246754	0	10.3925	19.7395	1.65915	0	0
arl-8	WBGene00000192	0.249292	0.599917	0.690018	574.999	501.675	642.718	688.549	423.495	928.748
arp-1	WBGene00013168	-0.128039	0.789018	0.845175	723.892	373.186	405.054	388.795	514.709	472.056
arp-11	WBGene00016793	-0.660962	0.193282	0.285079	126.363	154.943	156.337	74.6619	86.8707	115.24
arp-6	WBGene00007434	-0.850523	0.303128	0.404526	65.6302	60.4656	40.2686	53.646	23.8894	13.6581
arr-1	WBGene00000195	2.15503	0.0021053	0.00699499	255.664	51.0178	76.5892	498.852	723.198	484.861
arrd-1	WBGene00020205	1.05137	0.796119	NA	0	0	0	0.553051	0	0
arrd-10	WBGene00010268	-1.09057	0.202597	0.29441	32.3253	123.765	104.224	43.138	65.153	15.3653
arrd-11	WBGene00011052	4.06458	0.302771	NA	0	0	0	6.08356	2.17177	0
arrd-12	WBGene00011053	-3.93162	0.31773	NA	0	8.50297	0	0	0	0
arrd-13	WBGene00011054	-2.88268	0.00698742	0.0195448	347.742	152.109	123.964	69.6844	10.8588	2.56088
arrd-14	WBGene00011055	0.437927	0.535444	0.634221	92.0782	48.1835	128.701	176.976	130.306	57.1931
arrd-15	WBGene00014033	3.60549	2.39e-08	3.31e-07	50.9369	15.1164	18.9499	334.043	280.158	416.571
arrd-16	WBGene00013043	2.39712	0.0584087	0.113065	98.9351	0	21.3186	122.777	275.814	234.748
arrd-17	WBGene00011732	2.91029	3.36e-05	0.000195569	1150.98	268.316	209.239	3801.67	4171.96	4266.43
arrd-18	WBGene00018060	1.2011	0.0737865	0.136319	194.932	85.0297	63.9559	395.985	156.367	235.601
arrd-19	WBGene00018061	0.303174	0.68402	0.75998	145.954	29.288	62.3768	100.102	99.9013	93.0455
arrd-20	WBGene00015440	1.42198	0.342061	0.445343	46.0391	0	3.9479	43.691	67.3248	23.048
arrd-21	WBGene00015441	-0.626399	0.659274	0.739772	24.4889	10.3925	1.57916	9.40187	4.34353	9.38991
arrd-22	WBGene00020612	-1.41893	0.112016	0.189398	202.768	39.6805	54.481	55.8582	36.92	17.9262
arrd-23	WBGene00020323	0.644437	0.517168	0.617146	35.264	17.9507	6.31664	38.1605	36.92	17.9262
arrd-24	WBGene00009852	-1.91894	0.517537	0.6175	0	15.1164	4.73748	4.97746	0	0
arrd-25	WBGene00007296	1.1429	0.00598261	0.0170917	641.609	385.468	431.11	1055.77	1072.85	1090.94
arrd-26	WBGene00019873	4.28181	5.11e-21	8.95e-19	61.712	34.9567	45.006	780.908	994.669	979.112
arrd-28	WBGene00009000	6.20021	6.62e-07	6.36e-06	3.91822	0	0	65.26	84.6989	126.337
arrd-3	WBGene00006429	-3.96978	0.312966	NA	0	0	8.68537	0	0	0
arrd-4	WBGene00014159	3.78799	0.000239442	0.00106602	141.056	12.2821	4.73748	780.355	829.615	570.224
arrd-5	WBGene00014161	2.65042	0.0442657	0.0902095	16.6524	12.2821	0	61.9417	99.9013	19.6335
arrd-6	WBGene00009579	3.37175	3.42e-05	0.000198738	338.926	38.7358	59.2185	1262.06	1935.04	1323.12
arrd-7	WBGene00012464	-1.50463	0.215899	0.307785	27.4276	58.576	35.5311	14.3793	0	27.3161
arrd-8	WBGene00012467	2.03706	0.61266	NA	0	0	0	1.65915	0	0
arrd-9	WBGene00008843	-4.49622	0.132675	0.215426	0	23.6194	3.15832	0	2.17177	0
art-1	WBGene00000198	-1.26855	0.0222385	0.0513581	584.795	1626.9	760.365	414.788	501.678	318.403
arx-1	WBGene00000199	-0.00695613	0.987202	0.9913	682.75	400.584	449.271	512.678	475.617	536.079
arx-2	WBGene00000200	-0.996048	0.0149982	0.0369507	526.021	496.951	563.76	268.23	212.833	312.428
arx-3	WBGene00000201	0.257256	0.564518	0.659799	746.422	416.646	588.237	678.594	584.205	828.873
arx-4	WBGene00021170	-0.472623	0.256048	0.351673	387.904	291.935	321.359	215.137	256.269	250.967
arx-5	WBGene00000203	-0.556986	0.265037	0.362054	293.867	226.746	156.337	141.028	180.257	139.995
arx-6	WBGene00000204	-1.00671	0.0680554	0.128003	363.415	476.166	457.956	173.658	125.962	344.012
arx-7	WBGene00000205	-1.41957	0.0478779	0.0961555	148.892	201.237	140.545	59.1765	19.5459	102.435
asah-1	WBGene00010769	0.792102	0.254356	0.349758	32.3253	138.882	84.485	149.877	180.257	113.533
asb-1	WBGene00000206	-2.54385	1.46e-05	9.48e-05	376.149	610.324	623.768	91.8065	43.4353	138.288
asb-2	WBGene00000207	-1.01864	0.00853152	0.0231208	3888.84	4491.46	5425.99	2709.4	2158.74	1945.42
asc-1	WBGene00000208	0.26743	0.58882	0.680347	238.032	191.789	175.287	165.915	319.25	245.845
asd-1	WBGene00011279	1.77849	0.00827172	0.0225356	574.02	119.986	186.341	1295.25	836.13	886.92
asd-2	WBGene00006423	0.159939	0.791507	0.847013	553.449	598.987	313.463	774.825	230.207	629.124
asfl-1	WBGene00007277	-8.62371	6.91e-09	1.11e-07	72.4871	68.0238	78.9579	0	0	0
asg-1	WBGene00000209	-3.10455	7.1e-09	1.14e-07	892.375	1361.42	1566.53	229.516	110.76	101.582
asg-2	WBGene00000210	-1.41525	0.00246352	0.00802791	1874.87	3061.07	3469.41	1169.7	1246.59	736.681
ash-2	WBGene00012458	1.01438	0.0107216	0.0280353	171.422	171.949	190.289	358.377	360.513	359.378
asic-1	WBGene00022815	2.67379	0.000337791	0.00143843	57.7938	13.2268	22.8978	145.452	297.532	157.068
asic-2	WBGene00012137	3.08315	5.42e-05	0.000296194	8.816	30.2328	20.5291	96.2309	284.502	127.191
asm-1	WBGene00000211	-3.32766	0.00331269	0.0103267	108.731	143.606	96.3287	21.569	13.0306	0
asm-2	WBGene00000212	-0.677337	0.60862	0.697686	19.5911	17.0059	46.5852	30.4178	0	20.4871
asm-3	WBGene00000213	1.80943	0.138382	0.22239	6.85689	2.83432	4.73748	7.74272	17.3741	25.6088
asna-1	WBGene00014025	0.201381	0.622755	0.709588	441.78	506.399	500.593	487.791	701.481	479.739
asna-2	WBGene00018577	0.147021	0.967263	0.976622	14.6933	0	0	16.0385	0	0
asns-1	WBGene00003816	-6.70984	1.85e-08	2.64e-07	649.445	129.434	228.188	8.29577	0	0
asns-2	WBGene00019730	-1.22695	0.161742	0.250179	77.3849	278.708	192.657	111.716	13.0306	107.557
asp-1	WBGene00000214	-2.77298	3.76e-05	0.000215286	10277.5	47601.5	52166.7	6263.86	3222.9	6611.35
asp-10	WBGene00007605	-4.22758	8.59e-05	0.000437773	47.0187	481.835	139.756	22.6751	10.8588	1.70726
asp-11	WBGene00017677	-4.09486	0.297684	NA	0	0	9.47495	0	0	0
asp-12	WBGene00017678	-4.18137	0.000485961	0.00197092	66.6098	715.194	108.962	13.8263	0	34.1451
asp-13	WBGene00017881	-5.54416	1.32e-08	1.97e-07	362.436	2535.77	1317.81	70.2375	4.34353	13.6581
asp-14	WBGene00019619	-3.26649	3.3e-05	0.000192291	270.357	1905.61	2401.11	188.037	84.6989	201.456
asp-16	WBGene00012682	4.59472	0.242691	NA	0	0	0	1.65915	0	10.2435
asp-17	WBGene00012683	-8.11509	3.58e-08	4.74e-07	35.264	125.655	131.86	0.553051	0	0
asp-18	WBGene00013973	-4.98394	0.203631	0.295442	17.632	0	0	0	0	0
asp-2	WBGene00000215	-4.63026	6.52e-11	1.7e-09	2025.72	13658.6	11768.7	411.47	251.925	443.887
asp-3	WBGene00000216	-2.78537	3.49e-05	0.000202216	3035.64	19845	11580	1820.09	1379.07	1798.59
asp-4	WBGene00000217	-3.0413	1.15e-05	7.67e-05	904.13	3252.86	2112.13	421.978	234.551	104.143
asp-5	WBGene00000218	-3.13626	9.76e-06	6.67e-05	2562.52	13079.5	13527.1	1291.37	555.972	1468.24
asp-6	WBGene00000219	-2.78957	8.55e-05	0.000436173	5415.96	27929.4	32106.7	3551.14	1713.52	4199.85
asp-8	WBGene00019105	-3.90527	4.89e-08	6.25e-07	154.77	667.011	568.497	19.3568	28.233	45.2423
asp-9	WBGene00015700	8.5781	4.73e-08	6.09e-07	0	0	0	42.0319	97.7295	51.2177
aspm-1	WBGene00008107	-5.67571	1.36e-05	8.89e-05	72.4871	39.6805	163.443	4.42441	0	0
ast-1	WBGene00020368	3.37058	8.31e-07	7.7e-06	364.395	83.1401	82.1163	1939	1576.7	1958.22
atad-3	WBGene00010015	-1.21574	0.0796913	0.144567	191.013	174.783	618.241	90.1473	195.459	139.995
atat-2	WBGene00021059	2.62575	2.64e-06	2.1e-05	169.463	61.4103	80.5371	563.006	582.034	775.095
atf-2	WBGene00000220	-4.2378	0.00143246	0.00502861	81.3031	89.7536	15.7916	7.18966	2.17177	0
atf-5	WBGene00000221	-1.00034	0.0599154	0.115451	443.739	651.894	521.122	385.477	273.643	148.531
atf-6	WBGene00000222	1.45553	0.0998375	0.172915	90.1191	9.44774	44.2165	149.324	69.4966	174.14
atf-7	WBGene00000223	2.0674	1.36e-06	1.17e-05	1293.99	744.482	1087.25	4302.18	3576.9	5219.94
atf-8	WBGene00017535	-6.22481	2.04e-05	0.00012665	22.5298	160.612	22.8978	1.1061	2.17177	0
atfs-1	WBGene00013878	0.997842	0.0188134	0.0447033	307.581	321.223	439.796	629.372	636.328	868.14
atg-10	WBGene00008427	-0.588023	0.793568	0.848777	0	3.7791	26.8457	2.2122	0	17.9262
atg-11	WBGene00020334	1.89131	0.00142651	0.00501734	224.318	61.4103	153.968	536.46	618.954	476.325
atg-13	WBGene00017045	1.07602	0.0157089	0.0384369	173.381	259.813	185.551	367.779	516.881	421.692
atg-16.1	WBGene00017178	1.26052	0.0180732	0.0432064	44.08	45.3492	48.9539	120.565	112.932	98.1673
atg-16.2	WBGene00019427	0.178623	0.722717	0.792791	164.565	100.146	109.752	152.089	138.993	132.312
atg-18	WBGene00018294	1.70098	0.000718725	0.00275146	502.512	386.413	589.026	2196.72	905.627	1699.57
atg-2	WBGene00019748	-0.306391	0.542036	0.639819	346.763	677.403	351.363	291.458	432.182	390.108
atg-3	WBGene00021922	0.326249	0.483476	0.585525	249.787	398.695	248.718	295.882	412.636	417.424
atg-4.1	WBGene00013595	0.249032	0.646782	0.729221	294.846	176.673	131.86	261.593	175.913	277.429
atg-4.2	WBGene00014080	1.35811	0.0838334	0.15075	28.4071	72.7476	18.9499	61.9417	149.852	97.3136
atg-5	WBGene00022152	0.915076	0.1694	0.258859	97.9556	73.6924	77.3788	142.134	67.3248	257.796
atg-7	WBGene00010882	0.714643	0.181277	0.271733	211.584	99.2013	138.966	188.037	295.36	256.088
atg-9	WBGene00020706	1.13789	0.0240073	0.0546149	291.908	237.138	300.04	520.974	393.09	908.261
atgl-1	WBGene00015484	1.17535	0.011478	0.0296363	287.01	223.912	381.367	650.388	851.333	516.445
atgp-1	WBGene00000224	2.06135	3.54e-06	2.73e-05	757.197	599.932	371.102	2467.71	2182.63	2560.03
atgp-2	WBGene00000225	1.80296	1.78e-06	1.49e-05	452.555	338.229	424.794	1546.88	1344.32	1349.59
ath-1	WBGene00010564	-0.407464	0.291024	0.391122	425.127	471.442	532.177	374.969	338.796	362.792
athp-1	WBGene00008081	0.955252	0.0735173	0.135929	152.811	121.876	99.487	299.754	147.68	274.868
athp-2	WBGene00019217	1.17095	0.0191346	0.045355	192.972	190.844	177.655	333.49	629.812	304.745
athp-3	WBGene00013799	2.5578	0.325514	0.427836	0	0	7.10622	12.1671	30.4047	0
atic-1	WBGene00016957	1.99298	7.06e-07	6.7e-06	455.493	367.517	312.673	1466.14	1756.96	1298.37
atl-1	WBGene00000226	0.112975	0.876044	0.911342	109.71	58.576	50.5331	72.4497	125.962	40.1205
atln-1	WBGene00021868	-0.0413861	0.928179	0.949123	693.526	508.289	373.471	581.81	536.426	412.302
atln-2	WBGene00012763	-2.8714	7.4e-06	5.21e-05	1867.03	8262.05	2585.87	523.739	645.015	569.37
atm-1	WBGene00000227	1.64307	0.00560685	0.0161698	35.264	39.6805	55.2706	98.9961	123.791	184.384
atn-1	WBGene00000228	-1.21532	0.0134092	0.0337383	1263.63	1020.36	1322.55	694.632	566.831	291.941
atp-2	WBGene00000229	-1.0824	0.0255894	0.0574669	15194.9	16776.4	20274	9058.42	11104.2	4512.28
atp-3	WBGene00000230	-1.30904	0.00216814	0.0071849	4023.04	4673.8	6739.06	2409.64	2193.48	1627.02
atp-4	WBGene00020275	-1.80512	0.000135796	0.000655473	2412.65	3308.6	4425.59	1202.33	1051.14	650.465
atp-5	WBGene00007385	-0.955376	0.0415898	0.0856689	3831.04	5729.11	6556.67	3303.93	3227.25	1781.52
atp-6	WBGene00010960	-4.41376	5.26e-17	5.09e-15	55314.5	36446.6	94345.3	3597.04	1963.28	3168.67
attf-2	WBGene00017317	-1.0251	0.0111081	0.0288715	1699.53	1672.25	1132.26	636.562	794.867	782.777
attf-3	WBGene00018794	1.14845	0.0255749	0.0574537	162.606	77.4715	148.441	289.799	317.078	255.235
attf-4	WBGene00015477	1.69363	0.00467699	0.01385	441.78	121.876	192.657	772.059	705.824	967.161
attf-5	WBGene00020214	1.97159	0.0143653	0.0357232	28.4071	37.791	22.1082	143.24	171.57	32.4379
attf-6	WBGene00012474	-1.58189	0.0220861	0.0510778	146.933	182.341	150.81	92.3595	21.7177	43.535
atx-2	WBGene00000231	-0.131856	0.75871	0.821212	660.221	680.238	821.952	659.237	477.789	833.995
atx-3	WBGene00006446	-2.4203	0.00511681	0.0149558	99.9147	104.87	69.483	32.077	13.0306	5.12177
avr-14	WBGene00000232	3.31876	2.26e-09	4.07e-08	238.032	72.7476	126.333	1635.93	1292.2	1430.68
avr-15	WBGene00000233	1.81945	1.03e-05	6.97e-05	140.076	165.336	118.437	517.656	503.85	473.764
axl-1	WBGene00010497	-0.330886	0.814251	0.864993	33.3049	21.7298	15.7916	9.40187	0	46.0959
B0001.2	WBGene00007087	-3.31153	2.23e-09	4.03e-08	232.155	339.174	247.928	32.63	32.5765	17.9262
B0001.3	WBGene00007088	-0.173349	0.784726	0.841618	184.156	183.286	106.593	231.728	102.073	84.5092
B0001.4	WBGene00007089	-0.607515	0.229848	0.322254	299.744	248.476	202.132	219.008	156.367	116.093
B0001.5	WBGene00007090	1.34817	0.0335489	0.0719663	60.7325	59.5208	90.0121	247.214	82.5272	203.164
B0001.7	WBGene00007092	-0.860877	0.231325	0.323827	74.4462	41.5701	97.1183	28.2056	58.6377	32.4379
B0001.8	WBGene00007093	1.1058	0.133985	0.217041	59.7529	21.7298	46.5852	126.096	47.7789	99.8745
B0019.2	WBGene00007094	0.915011	0.172134	0.262016	38.2027	80.3058	34.7415	100.655	67.3248	119.508
B0024.10	WBGene00007100	-1.57209	0.00350161	0.0108396	134.199	104.87	150.81	41.4788	45.6071	44.3887
B0024.11	WBGene00007101	-0.989147	0.179678	0.270025	114.608	42.5148	119.227	68.5783	39.0918	30.7306
B0024.13	WBGene00007102	-0.902131	0.354376	0.457351	68.5689	152.109	85.2746	87.3821	4.34353	69.9975
B0024.15	WBGene00007104	1.91663	0.177856	0.26809	4.89778	0	19.7395	39.2666	34.7483	19.6335
B0024.3	WBGene00007096	1.35077	0.0599432	0.115464	34.2845	19.8403	18.9499	58.6234	82.5272	46.0959
B0024.4	WBGene00007097	-9.71883	8.84e-12	2.77e-10	125.383	104.87	238.453	0	0	0
B0025.4	WBGene00015001	0.320093	0.605081	0.694597	77.3849	119.042	57.6393	106.739	69.4966	139.141
B0025.5	WBGene00194700	-6.69125	5.52e-06	4.02e-05	22.5298	67.079	82.9058	1.1061	0	0
B0034.1	WBGene00015002	-1.65612	0.00946227	0.0252768	82.2827	185.176	130.281	43.691	28.233	52.925
B0034.10	WBGene00197686	-2.16233	0.579694	NA	6.85689	0	0	1.1061	0	0
B0034.2	WBGene00015003	6.0731	0.0101332	0.0267647	0	0	0	12.7202	8.68707	11.9508
B0034.4	WBGene00015004	0.083638	0.981613	NA	1.95911	0	3.9479	6.08356	0	0
B0034.5	WBGene00015005	1.84653	0.150597	0.237155	55.8347	0	16.5812	69.6844	71.6683	118.654
B0034.7	WBGene00044394	-0.0840499	0.975378	0.982425	0	33.0671	0	1.1061	0	29.877
B0035.1	WBGene00007105	-0.371457	0.500154	0.601208	463.33	274.929	394.79	233.941	186.772	453.277
B0035.12	WBGene00007111	0.237819	0.745089	0.810654	124.404	38.7358	158.705	75.768	184.6	121.215
B0035.13	WBGene00007112	-4.78068	1.42e-10	3.51e-09	295.826	1826.25	1819.98	62.4948	28.233	51.2177
B0035.15	WBGene00007113	-1.31294	0.0396816	0.0825446	79.344	226.746	140.545	58.6234	47.7789	72.5584
B0035.18	WBGene00044290	-5.56619	0.000133391	0.00064614	20.5707	52.9074	63.1664	2.2122	0	0
B0035.20	WBGene00219550	-2.21115	0.575169	NA	0	0	4.73748	0.553051	0	0
B0035.21	WBGene00235095	-4.90005	0.211439	0.303576	0	0	16.5812	0	0	0
B0035.3	WBGene00007106	-2.64874	0.00357655	0.0110301	84.2418	110.539	103.435	33.1831	8.68707	4.26814
B0035.6	WBGene00007109	-2.1504	0.109873	0.186639	44.08	150.219	165.812	13.2732	69.4966	0
B0041.1	WBGene00015006	-4.22148	0.282736	NA	0	10.3925	0	0	0	0
B0041.11	WBGene00206362	1.09957	0.276573	0.375011	29.3867	175.728	20.5291	89.0412	332.28	64.0221
B0041.5	WBGene00015009	0.184636	0.664396	0.743895	199.829	221.077	246.349	251.085	219.348	286.819
B0041.8	WBGene00015011	-1.27766	0.0933611	0.164414	76.4054	87.864	97.9079	21.0159	19.5459	66.583
B0198.2	WBGene00007115	4.29049	0.000151893	0.000720071	52.896	0	10.2645	420.872	336.624	475.471
B0198.3	WBGene00007116	2.69423	7.91e-06	5.54e-05	135.179	34.9567	75.0101	533.141	510.365	542.054
B0205.1	WBGene00015017	-0.572614	0.364184	0.467412	60.7325	57.6312	68.6934	37.6075	56.4659	33.2915
B0205.10	WBGene00015024	-9.84679	3.7e-13	1.62e-11	178.279	567.809	230.557	0.553051	0	0
B0205.12	WBGene00044413	-2.6269	6.1e-05	0.000326377	90.1191	204.071	212.397	19.3568	36.92	27.3161
B0205.13	WBGene00044644	-7.67895	3.05e-14	1.7e-12	212.564	461.05	506.12	4.42441	0	0
B0205.14	WBGene00044646	-8.22585	2.07e-07	2.26e-06	36.2436	57.6312	72.6413	0	0	0
B0205.4	WBGene00015019	-2.31291	0.356157	0.45908	9.79556	44.4044	0	10.508	0	0
B0205.6	WBGene00015021	-1.15993	0.012699	0.0322276	251.746	251.31	261.351	90.1473	108.588	143.41
B0205.8	WBGene00015022	-1.68621	0.00234587	0.00771175	121.465	127.545	134.229	35.3953	32.5765	50.3641
B0205.9	WBGene00015023	-0.162857	0.805156	0.858436	101.874	54.7969	45.006	64.707	47.7789	66.583
B0207.1	WBGene00015026	-4.80168	0.0567221	0.110489	4.89778	53.8521	0	1.65915	0	0
B0207.10	WBGene00015033	1.34628	0.20241	0.294216	46.0391	4.72387	15.7916	24.8873	102.073	43.535
B0207.11	WBGene00015034	-7.07406	0.000222843	0.00100023	11.7547	38.7358	24.477	0	0	0
B0207.2	WBGene00015027	3.75231	0.000639096	0.00249244	31.3458	0	12.6333	164.256	273.643	154.507
B0207.5	WBGene00015028	-0.798918	0.844774	NA	0	0.944774	0	0	0	0
B0207.6	WBGene00015029	-0.282015	0.723263	0.793284	20.5707	40.6253	72.6413	40.9258	30.4047	38.4133
B0207.7	WBGene00015030	-4.02149	0.0319248	0.0690641	29.3867	5.66865	18.1603	2.76526	0	0
B0207.9	WBGene00015032	-4.01408	0.115773	0.193997	20.5707	21.7298	0	2.2122	0	0
B0212.3	WBGene00015037	0.239448	0.950874	NA	0	0	3.15832	2.76526	0	0.853628
B0218.5	WBGene00015049	-5.30536	0.00562603	0.0162106	6.85689	48.1835	8.68537	1.1061	0	0
B0218.7	WBGene00015051	-7.62213	1.04e-06	9.31e-06	23.5093	125.655	58.4289	0.553051	0	0
B0222.1	WBGene00015053	2.18197	0.00207157	0.00689267	154.77	69.9133	42.6373	643.751	201.974	363.646
B0222.11	WBGene00044582	-0.15354	0.938697	0.956964	37.2231	0	15.002	23.2281	23.8894	0
B0222.14	WBGene00201384	1.05137	0.796119	NA	0	0	0	0.553051	0	0
B0222.15	WBGene00235316	1.9698	0.0757084	0.139058	23.5093	2.83432	9.47495	57.5173	69.4966	13.6581
B0222.5	WBGene00015056	-2.92426	0.0150897	0.0371483	92.0782	580.091	437.427	31.5239	0	113.533
B0228.1	WBGene00015059	-2.26608	0.177396	0.267623	70.528	51.9626	225.03	71.3436	0	0
B0228.6	WBGene00015063	3.56442	3.72e-13	1.63e-11	101.874	47.2387	59.2185	817.963	909.97	734.974
B0228.7	WBGene00015064	-0.981246	0.0519817	0.102771	362.436	650.005	469.01	320.217	262.784	167.311
B0228.8	WBGene00015065	1.05137	0.796119	NA	0	0	0	0.553051	0	0
B0228.9	WBGene00015066	5.55212	0.102841	0.177219	0	0	0	6.08356	0	17.0726
B0238.1	WBGene00015067	-0.385512	0.738255	0.805432	18.6116	66.1342	45.006	69.1314	2.17177	26.4625
B0238.10	WBGene00015074	-0.0861689	0.818407	0.868175	468.228	469.553	441.375	468.434	430.01	400.352
B0238.11	WBGene00015075	-0.977671	0.0660399	0.124854	133.22	238.083	229.768	103.421	123.791	79.3874
B0238.12	WBGene00015076	0.261976	0.846271	0.88936	185.136	0	69.483	75.2149	156.367	74.2657
B0238.15	WBGene00044537	-6.02437	0.123703	0.204267	36.2436	0	0	0	0	0
B0238.7	WBGene00015071	3.02254	0.447882	NA	0	0	0	3.87136	0	0
B0238.9	WBGene00015073	-4.95831	2.35e-05	0.00014355	169.463	343.898	155.547	2.2122	21.7177	0
B0244.10	WBGene00015085	-3.04219	0.0429262	0.0879811	8.816	12.2821	15.7916	1.65915	2.17177	0.853628
B0244.11	WBGene00015086	7.03196	0.00140439	0.00495117	0	0	0	8.29577	4.34353	52.0713
B0244.13	WBGene00196359	2.03706	0.61266	NA	0	0	0	1.65915	0	0
B0244.14	WBGene00200415	1.27791	0.753072	NA	0	0	0	0	2.17177	0
B0244.15	WBGene00206513	-5.02104	0.179139	0.269364	11.7547	0	6.31664	0	0	0
B0244.16	WBGene00271577	-4.09486	0.297684	NA	0	0	9.47495	0	0	0
B0244.17	WBGene00271715	2.03706	0.61266	NA	0	0	0	1.65915	0	0
B0244.4	WBGene00015079	-4.58975	0.0715625	0.133062	44.08	6.61342	0	1.65915	0	0
B0244.6	WBGene00015081	-3.89455	0.0274183	0.0608678	9.79556	24.5641	23.6874	3.31831	0	0
B0244.9	WBGene00015084	-7.99414	3.35e-06	2.61e-05	19.5911	85.9745	36.3207	0	0	0
B0244.t2	WBGene00022898	2.80872	0.481926	NA	0	0	0	3.31831	0	0
B0250.12	WBGene00050927	1.93098	0.140826	0.22548	31.3458	33.0671	14.2124	129.414	0	169.018
B0250.18	WBGene00206505	2.23212	0.463404	0.56631	4.89778	0	0	20.4629	2.17177	0
B0250.3	WBGene00007120	-4.40275	0.00134733	0.00477562	15.6729	45.3492	22.1082	1.65915	0	1.70726
B0250.4	WBGene00007121	4.21165	3.52e-05	0.000203286	7.83645	0	6.31664	79.6394	91.2142	92.1919
B0250.5	WBGene00007122	-1.98531	0.000158115	0.000746028	502.512	652.839	1134.63	222.327	219.348	137.434
B0250.7	WBGene00007124	-2.684	0.336585	0.439884	3.91822	26.4537	0	4.42441	0	0
B0252.1	WBGene00015087	1.47297	0.585079	0.677451	0	14.1716	0	4.97746	34.7483	0
B0252.3	WBGene00015088	-2.30172	0.00202456	0.00676087	120.485	185.176	168.18	56.9643	26.0612	11.9508
B0252.5	WBGene00015089	-2.59476	0.052326	0.103382	43.1005	62.3551	81.3267	4.42441	28.233	0
B0252.8	WBGene00044615	-0.682766	0.31109	0.412963	404.557	426.093	492.698	399.856	73.8401	347.427
B0261.1	WBGene00015091	1.23789	0.00339199	0.0105379	158.688	146.44	177.655	360.589	447.384	332.915
B0261.5	WBGene00015093	-6.18665	0.00628385	0.01781	10.7751	22.6746	7.10622	0	0	0
B0261.6	WBGene00015094	-8.59399	1.86e-09	3.41e-08	51.9165	205.961	150.81	0.553051	0	0
B0261.7	WBGene00015095	-4.42936	0.000142142	0.0006819	90.1191	80.3058	273.195	4.97746	17.3741	0
B0261.8	WBGene00015096	-1.72225	0.204893	0.296696	175.34	49.1283	31.5832	40.9258	36.92	0
B0272.3	WBGene00007129	-2.36436	9.17e-06	6.32e-05	314.437	684.017	447.692	117.247	69.4966	92.1919
B0272.4	WBGene00007130	-0.123923	0.936825	0.955529	0	43.4596	48.9539	19.3568	4.34353	60.6076
B0273.1	WBGene00015097	-5.12828	0.0014059	0.00495438	30.3662	29.288	18.9499	1.65915	0	0
B0280.11	WBGene00015106	-8.30897	2.14e-06	1.75e-05	10.7751	104.87	60.7976	0	0	0
B0280.13	WBGene00015107	-1.08166	0.443924	0.547417	6.85689	49.1283	23.6874	22.122	0	14.5117
B0280.17	WBGene00044674	-8.97885	7.68e-09	1.22e-07	33.3049	136.048	111.331	0	0	0
B0280.7	WBGene00015103	-7.72709	9.16e-05	0.000462871	22.5298	90.6983	4.73748	0	0	0
B0280.9	WBGene00015104	-1.40435	0.0919262	0.162321	134.199	190.844	56.8497	73.5558	13.0306	55.4858
B0281.1	WBGene00015108	1.61916	0.688888	NA	0	0	0	1.1061	0	0
B0281.3	WBGene00015110	-0.860501	0.300105	0.401164	19.5911	36.8462	47.3748	17.1446	21.7177	18.7798
B0281.5	WBGene00015112	1.10003	0.670798	0.749584	0	17.0059	0	21.569	0	14.5117
B0281.6	WBGene00015113	4.77941	0.00129335	0.00461412	8.816	0	0	98.9961	115.104	24.7552
B0284.1	WBGene00007131	5.12788	0.175679	0.265992	0	0	0	6.63661	10.8588	0
B0284.2	WBGene00007132	6.63947	0.0240258	0.0546495	0	0	0	4.42441	45.6071	0
B0284.3	WBGene00007133	-0.450143	0.718888	0.789433	30.3662	71.8029	9.47495	20.4629	2.17177	58.0467
B0284.4	WBGene00007134	-3.13148	0.42859	NA	4.89778	0	0	0	0	0
B0284.5	WBGene00045188	0.657389	0.870873	NA	0	0	0.789579	1.1061	0	0
B0284.6	WBGene00045189	-2.18575	0.173501	0.2635	48.9778	16.0612	17.3707	0.553051	0	17.0726
B0285.3	WBGene00007136	-0.735788	0.447912	0.550931	9.79556	52.9074	45.7956	18.8037	15.2024	30.7306
B0285.4	WBGene00007137	-1.31913	0.298744	0.399717	117.547	131.324	148.441	60.2826	99.9013	0
B0285.6	WBGene00007138	-2.41113	0.0801776	0.145304	19.5911	34.9567	63.9559	6.08356	17.3741	0
B0286.1	WBGene00015115	1.79777	0.00137879	0.00487449	156.729	94.4774	60.7976	274.313	373.544	436.204
B0286.3	WBGene00015116	-2.2357	0.00582457	0.0166982	134.199	609.379	363.207	81.2985	132.478	23.048
B0294.1	WBGene00015117	1.56142	0.0334421	0.0717802	327.172	79.361	87.6433	769.294	367.029	320.111
B0294.3	WBGene00015118	1.05137	0.796119	NA	0	0	0	0.553051	0	0
B0302.2	WBGene00015119	-1.57524	0.679526	0.756306	13.7138	0	0	4.42441	0	0
B0302.4	WBGene00015121	6.48467	0.0031945	0.0100133	0	0	0	7.18966	15.2024	22.1943
B0302.5	WBGene00015122	-1.89306	0.00470683	0.0139258	103.833	229.58	281.09	30.4178	78.1836	58.9004
B0303.11	WBGene00015131	-1.50742	0.0858102	0.153432	57.7938	436.486	156.337	119.459	28.233	79.3874
B0303.14	WBGene00015132	0.254025	0.857099	0.897647	4.89778	3.7791	26.8457	19.9098	2.17177	19.6335
B0303.16	WBGene00044678	1.06904	0.770433	0.830676	8.816	0	0	18.2507	0	0
B0303.3	WBGene00015125	-2.2113	3.08e-05	0.000181589	437.861	861.634	655.351	140.475	89.0425	190.359
B0303.4	WBGene00015126	0.701252	0.145485	0.230961	120.485	156.833	146.072	245.555	277.986	166.458
B0303.7	WBGene00015128	1.03592	0.0428489	0.0878446	286.03	140.771	307.146	529.27	393.09	581.321
B0304.2	WBGene00015134	-6.08699	6.37e-06	4.56e-05	48.9778	49.1283	60.008	1.65915	0	0
B0304.4	WBGene00015136	-6.61698	0.000184418	0.000852158	6.85689	55.7417	40.2686	0.553051	0	0
B0310.1	WBGene00015137	-0.396183	0.772626	0.832549	79.344	31.1776	97.1183	101.208	56.4659	0
B0310.2	WBGene00015138	-2.2262	0.177862	0.26809	40.1618	17.9507	6.31664	11.061	2.17177	0
B0310.3	WBGene00015139	1.38428	0.0734265	0.135827	45.0596	14.1716	18.9499	68.0253	82.5272	53.7786
B0310.6	WBGene00015142	-4.65676	0.0143336	0.0356714	12.7342	36.8462	5.52706	1.65915	0	0
B0334.10	WBGene00007148	-3.51234	0.373232	NA	0	0	6.31664	0	0	0
B0334.13	WBGene00007149	-8.39323	2.57e-10	5.86e-09	67.5894	340.119	163.443	1.1061	0	0
B0334.3	WBGene00007143	-1.19553	0.0146468	0.0362534	416.311	902.26	890.646	312.474	306.219	345.719
B0334.4	WBGene00007144	-1.32056	0.0708685	0.132041	142.036	236.194	172.918	106.186	19.5459	92.1919
B0334.5	WBGene00007145	-0.685581	0.256583	0.352319	67.5894	95.4222	117.647	61.9417	41.2636	69.9975
B0334.6	WBGene00007146	-1.4183	0.356496	0.459445	41.1413	47.2387	5.52706	9.95492	26.0612	0
B0336.12	WBGene00015149	-3.51234	0.373232	NA	0	0	6.31664	0	0	0
B0336.13	WBGene00015150	-0.893315	0.133462	0.216342	95.0169	102.036	78.1684	35.3953	49.9506	63.1685
B0336.3	WBGene00015143	0.50443	0.224649	0.316527	410.434	319.334	305.567	403.727	534.255	531.81
B0336.5	WBGene00015145	-3.15315	0.0413025	0.085248	41.1413	58.576	61.5872	17.1446	0	0
B0336.7	WBGene00015147	-0.0870515	0.898465	0.92709	77.3849	31.1776	78.1684	52.5399	69.4966	54.6322
B0348.10	WBGene00255704	5.44546	0.124481	0.205172	0	0	0	6.63661	15.2024	0
B0348.2	WBGene00015152	1.8959	0.00835282	0.0227166	47.9982	33.0671	11.8437	115.035	106.417	122.922
B0348.5	WBGene00015153	-4.24653	0.124164	0.204864	0	11.3373	18.1603	1.1061	0	0
B0348.9	WBGene00235314	2.03706	0.61266	NA	0	0	0	1.65915	0	0
B0350.77	WBGene00200898	1.61916	0.688888	NA	0	0	0	1.1061	0	0
B0353.1	WBGene00015155	-1.41133	0.00301009	0.00951681	378.109	234.304	251.876	100.655	106.417	117.801
B0361.11	WBGene00015165	-3.58019	0.212288	0.304326	9.79556	15.1164	0	1.65915	0	0
B0361.2	WBGene00015156	-0.429513	0.415439	0.518944	304.642	571.589	237.663	306.39	282.33	238.162
B0361.3	WBGene00015157	-2.34758	0.00307355	0.00969508	176.32	84.0849	100.277	42.0319	17.3741	10.2435
B0361.4	WBGene00015158	2.96954	0.000597452	0.00236025	165.545	15.1164	27.6353	541.99	440.869	646.197
B0361.6	WBGene00015160	-2.20918	0.000518443	0.00208569	117.547	190.844	185.551	54.199	28.233	23.048
B0361.8	WBGene00015162	0.616697	0.203458	0.295321	207.666	382.634	286.617	373.863	584.205	389.255
B0361.9	WBGene00015163	-1.87939	0.0319345	0.069076	47.9982	201.237	84.485	51.9868	26.0612	11.9508
B0365.9	WBGene00219208	-2.1841	0.11557	0.193781	35.264	65.1894	26.8457	5.53051	23.8894	0
B0379.1	WBGene00007155	-1.22756	0.0733559	0.135782	322.274	255.089	406.633	263.805	95.5578	58.9004
B0379.11	WBGene00197704	1.27791	0.753072	NA	0	0	0	0	2.17177	0
B0379.2	WBGene00007156	-7.53392	3.98e-06	3.02e-05	19.5911	139.827	35.5311	0.553051	0	0
B0379.7	WBGene00007159	-7.87618	1.07e-09	2.07e-08	81.3031	216.353	103.435	1.1061	0	0
B0391.10	WBGene00007165	-5.53385	8.73e-05	0.000444136	16.6524	62.3551	34.7415	1.1061	0	0.853628
B0391.14	WBGene00206462	-0.798918	0.844774	NA	0	0.944774	0	0	0	0
B0393.3	WBGene00007168	-4.27303	2.01e-05	0.000125026	78.3645	71.8029	87.6433	8.29577	2.17177	0.853628
B0393.4	WBGene00007169	-8.83944	1.95e-07	2.14e-06	76.4054	164.391	14.2124	0	0	0
B0393.5	WBGene00007170	-0.10286	0.92305	0.945642	10.7751	84.0849	26.8457	38.1605	10.8588	63.1685
B0393.6	WBGene00007171	-6.13456	0.00254127	0.0082535	2.93867	9.44774	60.7976	0.553051	0	0
B0393.7	WBGene00007172	4.56751	0.00149229	0.00519853	0	0	11.0541	40.9258	134.65	92.1919
B0393.9	WBGene00044636	-2.53395	NA	NA	70.528	122.821	71.8517	43.691	0	0.853628
B0395.3	WBGene00007175	0.601827	0.214778	0.306734	478.023	228.635	309.515	557.475	562.488	422.546
B0399.t8	WBGene00014651	1.27791	0.753072	NA	0	0	0	0	2.17177	0
B0403.13	WBGene00200741	1.05137	0.796119	NA	0	0	0	0.553051	0	0
B0403.3	WBGene00015167	-1.88561	0.0189482	0.0449716	143.995	43.4596	146.862	13.8263	41.2636	36.706
B0403.5	WBGene00015169	-5.03673	2.14e-10	5e-09	211.584	515.847	149.231	3.87136	10.8588	12.8044
B0403.6	WBGene00043982	-2.13321	0.202327	0.294172	8.816	38.7358	10.2645	10.508	2.17177	0
B0410.3	WBGene00015172	-3.62127	2.59e-06	2.06e-05	202.768	1174.35	567.708	89.0412	36.92	30.7306
B0416.10	WBGene00206482	3.20849	0.419412	NA	0	0	0	4.42441	0	0
B0416.11	WBGene00206483	-5.33796	0.173006	0.262978	22.5298	0	0	0	0	0
B0416.3	WBGene00015179	1.57643	0.0260369	0.0582652	22.5298	39.6805	19.7395	60.2826	67.3248	116.093
B0416.4	WBGene00015180	-4.52439	0.249094	NA	4.89778	0	7.89579	0	0	0
B0416.5	WBGene00015181	1.13699	0.00335083	0.0104258	680.791	651.894	484.802	1317.37	1205.33	1472.51
B0416.7	WBGene00015182	-1.45313	0.301595	0.402698	16.6524	90.6983	45.006	35.9483	19.5459	0
B0432.1	WBGene00015183	0.826088	0.549293	0.646343	50.9369	28.3432	0	37.6075	71.6683	31.5842
B0432.10	WBGene00015191	-4.94099	0.000345515	0.00146828	31.3458	126.6	59.2185	6.08356	0	0
B0432.11	WBGene00015192	-6.55767	0.0206355	0.04822	13.7138	38.7358	0	0	0	0
B0432.13	WBGene00015194	-1.55401	0.313743	0.41578	17.632	5.66865	14.2124	6.08356	0	5.9754
B0432.14	WBGene00044640	3.03296	5.35e-12	1.77e-10	194.932	260.758	275.563	2605.42	1474.63	1903.59
B0432.7	WBGene00015188	-0.313206	0.820969	0.870163	30.3662	38.7358	37.8998	32.63	54.2942	0
B0432.8	WBGene00015189	-3.19911	0.0696827	0.130333	17.632	17.9507	21.3186	5.53051	0	0
B0432.9	WBGene00015190	-3.08812	0.139561	0.223819	7.83645	3.7791	25.2665	3.87136	0	0
B0454.18	WBGene00199082	1.61916	0.688888	NA	0	0	0	1.1061	0	0
B0454.26	WBGene00206372	-5.86046	0.0620505	0.118745	0	18.8955	13.4229	0	0	0
B0454.5	WBGene00015196	-4.54193	0.00190105	0.00642272	21.5502	113.373	54.481	7.18966	0	0
B0454.6	WBGene00015197	-4.86982	4.86e-05	0.000268973	120.485	1145.07	386.104	22.6751	34.7483	0
B0454.8	WBGene00015199	-2.99383	0.140165	0.224509	6.85689	47.2387	3.15832	6.63661	0	0
B0454.9	WBGene00015200	1.78081	0.00141067	0.004968	67.5894	45.3492	44.2165	132.179	238.894	170.726
B0457.12	WBGene00198916	-1.80112	0.654845	NA	1.95911	0	0	0	0	0
B0457.18	WBGene00202113	1.05137	0.796119	NA	0	0	0	0.553051	0	0
B0457.2	WBGene00007178	-1.03483	0.235065	0.327503	19.5911	202.182	136.597	66.3661	60.8095	47.8032
B0457.3	WBGene00014660	-3.61864	0.358616	NA	6.85689	0	0	0	0	0
B0457.4	WBGene00007179	7.00928	0.000903676	0.00337354	0	0	0	4.42441	19.5459	40.1205
B0457.6	WBGene00007180	0.715032	0.33737	0.440595	270.357	126.6	107.383	367.779	78.1836	379.011
B0462.1	WBGene00007181	5.17504	0.164343	0.253277	0	0	0	3.31831	0	14.5117
B0462.4	WBGene00007183	-3.31166	0.222683	0.314716	19.5911	0	11.0541	2.76526	0	0
B0462.5	WBGene00194695	-0.798918	0.844774	NA	0.979556	0	0	0	0	0
B0464.6	WBGene00007186	-1.45419	0.0234001	0.0535371	93.0578	176.673	169.76	47.0093	32.5765	79.3874
B0464.9	WBGene00007188	-1.18108	0.0764009	0.140113	51.9165	120.931	75.0101	35.3953	32.5765	40.9742
B0478.26	WBGene00202008	2.3444	0.558942	NA	0	0	0	2.2122	0	0
B0478.3	WBGene00015202	0.938583	0.526941	0.626133	6.85689	11.3373	11.8437	40.3727	0	16.2189
B0491.1	WBGene00007189	-0.984849	0.194474	0.286107	81.3031	77.4715	122.385	72.4497	15.2024	52.0713
B0491.5	WBGene00007192	-1.31503	0.00201341	0.00672512	1346.89	1661.86	2095.54	816.856	707.996	526.689
B0491.6	WBGene00007193	0.630166	0.237516	0.330458	147.913	97.3118	143.703	202.97	267.127	134.02
B0491.7	WBGene00007194	-1.36937	0.0678268	0.127631	71.5076	134.158	141.335	54.199	65.153	16.2189
B0495.18	WBGene00198226	-1.80112	0.654845	NA	1.95911	0	0	0	0	0
B0495.2	WBGene00015203	-0.803824	0.306959	0.4086	103.833	159.667	107.383	98.4431	97.7295	17.0726
B0495.22	WBGene00201744	4.8772	0.214397	0.306574	0	0	0	0	0	14.5117
B0495.5	WBGene00015204	0.870071	0.142131	0.226996	129.301	65.1894	62.3768	128.861	206.318	135.727
B0495.7	WBGene00015206	-1.35754	0.00266147	0.00858793	583.815	914.542	609.555	303.625	208.49	308.16
B0495.8	WBGene00015207	0.294026	0.589596	0.680935	135.179	81.2506	174.497	190.25	143.337	145.117
B0495.9	WBGene00015208	-0.743133	0.243733	0.337379	121.465	145.495	124.754	123.33	69.4966	40.1205
B0496.1	WBGene00015210	-6.17357	0.0410607	0.0848766	0	33.0671	7.10622	0	0	0
B0496.11	WBGene00194883	4.81694	0.220221	0.312054	0	0	0	13.8263	0	0
B0496.6	WBGene00015215	-1.58902	0.56312	0.658468	7.83645	0	19.7395	8.84882	0	0
B0507.1	WBGene00015218	0.696057	0.450348	0.553348	28.4071	39.6805	11.0541	31.5239	76.0119	22.1943
B0507.10	WBGene00015227	-0.568618	0.841033	0.885269	9.79556	10.3925	0	13.2732	0	0
B0507.15	WBGene00202499	-0.181481	0.955787	0.969041	0	9.44774	0	3.87136	0	4.26814
B0507.17	WBGene00235307	-1.75223	0.647952	0.729956	11.7547	0	0	3.31831	0	0
B0507.2	WBGene00015219	1.44369	0.0220956	0.0510855	296.805	98.2565	86.8537	380.499	447.384	482.3
B0507.3	WBGene00015220	1.25424	0.38294	0.486473	6.85689	0	46.5852	40.9258	30.4047	56.3395
B0507.4	WBGene00015221	5.06322	0.196244	0.287951	0	0	0	1.65915	15.2024	0
B0507.6	WBGene00015223	-6.41372	0.00282134	0.00902411	7.83645	19.8403	19.7395	0	0	0
B0507.8	WBGene00015225	0.927385	0.731688	0.800231	0	14.1716	0	13.8263	0	12.8044
B0507.9	WBGene00015226	-0.626528	0.872278	NA	3.91822	0	0	2.2122	0	0
B0511.11	WBGene00015236	-2.9448	0.0162239	0.0394448	46.0391	94.4774	63.9559	8.29577	19.5459	0
B0511.12	WBGene00015237	1.40766	0.00467193	0.01384	180.238	194.624	250.297	634.35	330.109	691.439
B0511.13	WBGene00015238	0.792572	0.491818	0.592964	6.85689	66.1342	19.7395	57.5173	95.5578	8.53628
B0511.19	WBGene00255714	-5.28793	0.000200525	0.000915779	26.448	46.2939	63.9559	2.76526	0	0
B0511.2	WBGene00015228	-1.28575	0.73811	NA	0	8.50297	0	3.31831	0	0
B0511.6	WBGene00015232	0.697762	0.0602066	0.115877	623.977	597.097	639.559	1083.98	1088.06	846.799
B0511.7	WBGene00015233	-1.03376	0.0715563	0.133062	85.2214	118.097	82.9058	45.3502	54.2942	40.9742
B0513.2	WBGene00007195	-2.61732	9.96e-05	0.000497856	139.097	195.568	165.812	28.2056	43.4353	11.9508
B0513.4	WBGene00007196	-3.9065	6.29e-12	2.04e-10	469.207	461.995	888.277	36.5014	26.0612	57.1931
B0513.5	WBGene00007197	2.05288	7.6e-06	5.35e-05	245.869	136.992	192.657	875.48	888.253	624.856
B0513.7	WBGene00007199	2.03706	0.61266	NA	0	0	0	1.65915	0	0
B0513.90	WBGene00235301	-4.09486	0.297684	NA	0	0	9.47495	0	0	0
B0524.4	WBGene00015243	-5.66994	0.147571	0.233377	0	28.3432	0	0	0	0
B0524.5	WBGene00015244	-8.98561	3.66e-09	6.22e-08	65.6302	159.667	56.8497	0	0	0
B0524.6	WBGene00015245	-1.71545	0.176407	0.266694	68.5689	61.4103	58.4289	31.5239	26.0612	0
B0545.4	WBGene00015247	-4.67095	5.93e-05	0.000318633	118.526	41.5701	92.3808	7.74272	0	0.853628
B0546.3	WBGene00015250	2.25147	1.66e-05	0.000105788	236.073	101.091	196.605	690.761	1118.46	734.974
B0546.4	WBGene00015251	2.38707	1.21e-07	1.38e-06	262.521	185.176	226.609	970.605	1604.94	955.21
B0546.5	WBGene00015252	3.99426	0.311438	NA	0	0	0	7.74272	0	0
B0554.4	WBGene00015257	-3.61864	0.358616	NA	6.85689	0	0	0	0	0
B0554.5	WBGene00015258	-4.07501	0.155012	0.242483	0	19.8403	6.31664	1.1061	0	0
B0554.7	WBGene00015260	1.60416	0.601225	0.691233	5.87733	0	0	4.97746	13.0306	0
B0563.1	WBGene00015261	1.05629	0.716897	0.788088	0	0	8.68537	9.40187	0	8.53628
B0563.18	WBGene00206365	3.76481	0.0842018	0.151257	7.83645	0	0	40.3727	0	64.8758
B0563.5	WBGene00015262	-3.84479	0.0122822	0.0313487	38.2027	54.7969	22.8978	7.18966	0	0
B0563.6	WBGene00015263	2.36405	0.00576594	0.0165532	342.845	44.4044	37.8998	716.201	658.045	812.654
B0563.7	WBGene00015264	0.407959	0.515585	0.615707	83.2622	97.3118	37.8998	86.829	108.588	94.7527
B0564.2	WBGene00007202	-1.20934	0.108465	0.184629	35.264	84.0849	70.2726	18.8037	39.0918	25.6088
B0564.7	WBGene00007207	-0.965459	0.0975004	0.169813	95.9965	96.367	106.593	65.26	34.7483	51.2177
baf-1	WBGene00000235	-3.04968	0.00374432	0.0114722	295.826	590.484	435.058	70.7905	0	87.0701
bag-1	WBGene00000236	-0.0636155	0.920637	0.943934	89.1396	232.415	152.389	90.1473	143.337	220.236
bah-1	WBGene00050875	-7.46919	9.86e-07	8.94e-06	35.264	226.746	32.3728	1.1061	0	0
bam-2	WBGene00000237	2.78137	4.24e-07	4.28e-06	304.642	188.955	93.1704	1411.39	1429.02	1190.81
bar-1	WBGene00000238	1.28947	0.030541	0.0666313	118.526	174.783	140.545	408.152	154.195	495.104
bas-1	WBGene00000239	1.09836	0.00998004	0.0264239	177.3	238.083	161.074	434.698	384.403	414.01
basl-1	WBGene00015467	-6.05844	6.64e-05	0.000351036	25.4685	43.4596	41.8477	1.1061	0	0
basl-2	WBGene00017392	-6.01109	0.124538	0.205174	0	35.9014	0	0	0	0
bath-1	WBGene00019139	-0.643821	0.686294	0.761931	27.4276	15.1164	14.2124	4.97746	32.5765	0
bath-10	WBGene00021726	6.65156	0.014919	0.0367884	0	0	0	24.8873	0	24.7552
bath-11	WBGene00018664	0.296424	0.920002	0.943459	15.6729	0	0	2.2122	17.3741	0
bath-12	WBGene00019131	3.20849	0.419412	NA	0	0	0	4.42441	0	0
bath-13	WBGene00018223	1.65753	0.55306	0.649939	0	0	9.47495	4.42441	26.0612	0
bath-14	WBGene00015016	1.38262	0.730349	NA	0	0.944774	0	2.2122	0	0
bath-15	WBGene00015590	-1.02777	0.226726	0.318719	24.4889	60.4656	43.4269	24.3342	28.233	11.0972
bath-18	WBGene00018224	-2.39063	0.548912	NA	2.93867	0	0	0	0	0
bath-19	WBGene00019132	-4.29804	0.163712	0.252633	14.6933	5.66865	0	0.553051	0	0
bath-2	WBGene00018668	-4.55419	0.00600553	0.0171363	44.08	21.7298	13.4229	2.76526	0	0
bath-20	WBGene00015012	-2.4965	0.524535	NA	5.87733	0.944774	0	0	2.17177	0
bath-21	WBGene00019138	-5.68013	0.0863283	0.154208	5.87733	22.6746	0	0	0	0
bath-22	WBGene00018658	1.05137	0.796119	NA	0	0	0	0.553051	0	0
bath-24	WBGene00015014	0.145898	0.969539	NA	0	5.66865	0	6.08356	0	0
bath-25	WBGene00020859	-4.09486	0.297684	NA	0	0	9.47495	0	0	0
bath-26	WBGene00020329	1.92387	0.177427	0.267646	3.91822	0	21.3186	29.3117	34.7483	32.4379
bath-27	WBGene00017450	-5.98161	0.0517535	0.102473	0	21.7298	13.4229	0	0	0
bath-28	WBGene00017461	-3.1574	0.0141069	0.0351976	32.3253	32.1223	44.2165	4.42441	8.68707	0
bath-29	WBGene00017452	-4.35736	0.0720443	0.133747	21.5502	0	32.3728	2.2122	0	0
bath-3	WBGene00019140	-3.48137	0.0530129	0.104476	7.83645	45.3492	15.7916	5.53051	0	0
bath-30	WBGene00017460	-2.98025	0.0302882	0.0661586	56.8142	102.036	49.7435	2.2122	26.0612	0
bath-34	WBGene00012195	-3.82003	0.251716	0.346562	5.87733	0	8.68537	0.553051	0	0
bath-35	WBGene00012196	-3.39552	0.389718	NA	5.87733	0	0	0	0	0
bath-36	WBGene00013569	1.70214	0.47278	0.575313	0.979556	8.50297	0	9.40187	21.7177	0
bath-37	WBGene00010669	2.36145	0.178066	0.268338	43.1005	0	0	126.096	30.4047	64.0221
bath-38	WBGene00009945	-0.205921	0.698946	0.772173	178.279	154.943	217.134	188.59	193.287	96.46
bath-39	WBGene00009137	0.00637895	0.994652	0.996348	96.976	32.1223	13.4229	65.8131	23.8894	52.0713
bath-4	WBGene00018665	-0.354197	0.839423	0.884084	2.93867	33.0671	13.4229	4.97746	34.7483	0
bath-40	WBGene00013689	0.226641	0.610197	0.699194	408.475	312.72	478.485	441.888	586.377	378.157
bath-41	WBGene00018137	-2.47582	0.0149319	0.0368095	135.179	143.606	110.541	33.1831	0	34.9988
bath-42	WBGene00016803	0.519376	0.246872	0.340892	336.967	237.138	313.463	322.982	430.01	519.86
bath-43	WBGene00011815	1.09559	0.0296369	0.0649463	415.332	201.237	240.822	588.999	766.634	478.032
bath-44	WBGene00015567	1.35677	0.00219761	0.00727379	431.984	239.973	311.094	776.484	975.123	767.412
bath-45	WBGene00009247	5.90007	0.0705043	0.131531	0	0	0	6.08356	23.8894	0
bath-46	WBGene00020325	0.476163	0.748037	0.812923	8.816	15.1164	10.2645	33.7361	0	12.8044
bath-47	WBGene00006464	2.15423	0.0188648	0.0447865	4.89778	24.5641	11.0541	65.26	82.5272	33.2915
bath-5	WBGene00019141	-6.10066	4.13e-05	0.000233669	36.2436	38.7358	39.479	1.1061	0	0
bath-7	WBGene00018667	0.407685	0.885585	0.918667	18.6116	0	0	3.31831	21.7177	0
bath-8	WBGene00021723	-2.34299	0.557171	NA	0	2.83432	0	0	0	0
bath-9	WBGene00021725	8.05752	5.86e-06	4.23e-05	0	0	0	19.3568	91.2142	23.048
bbs-1	WBGene00000241	3.51324	0.00478206	0.0141027	63.6711	0	6.31664	326.853	247.581	222.797
bbs-2	WBGene00000242	3.50828	0.0227054	0.0522601	0	0	26.8457	101.208	86.8707	119.508
bbs-4	WBGene00043992	4.34778	0.00222215	0.00734467	0	0	12.6333	103.974	82.5272	75.1193
bbs-5	WBGene00010974	3.48974	0.000324762	0.00138869	46.0391	27.3985	1.57916	339.02	356.17	145.117
bbs-8	WBGene00000244	3.81101	0.00157399	0.00543493	73.4667	0	9.47495	379.393	353.998	428.521
bbs-9	WBGene00016744	2.01429	0.122942	0.203236	16.6524	0	20.5291	59.1765	69.4966	22.1943
bca-1	WBGene00000245	-0.728307	0.159477	0.24742	115.588	217.298	180.024	99.5492	110.76	99.8745
bca-2	WBGene00013805	0.271462	0.652901	0.734174	227.257	115.262	212.397	194.674	347.483	130.605
bcat-1	WBGene00001149	0.0474258	0.913373	0.938208	1250.89	996.737	1490.73	1587.26	1355.18	921.065
bcc-1	WBGene00000246	-1.15339	0.554588	0.651315	6.85689	14.1716	61.5872	36.5014	0	0
bcl-1	WBGene00016192	-1.13766	0.0810767	0.146562	68.5689	61.4103	57.6393	32.63	21.7177	29.877
bcmo-1	WBGene00012914	-2.54469	0.334653	0.437917	0	10.3925	7.10622	1.1061	2.17177	0
bcmo-2	WBGene00018755	1.17758	0.128862	0.210714	75.4258	40.6253	51.3227	98.4431	236.723	46.0959
bcs-1	WBGene00010042	-3.56638	0.00549091	0.01588	70.528	107.704	129.491	22.6751	2.17177	0
BE0003N10.1	WBGene00015266	-1.20014	0.0539988	0.106177	78.3645	95.4222	86.0642	46.4563	23.8894	40.9742
BE0003N10.3	WBGene00015268	0.0641606	0.977858	0.983959	6.85689	0	3.15832	0.553051	2.17177	7.68265
BE0003N10.6	WBGene00255598	-0.596758	0.724126	0.793966	0	117.152	4.73748	5.53051	28.233	46.9496
BE10.1	WBGene00007209	-6.61681	0.000241965	0.0010746	7.83645	73.6924	21.3186	0.553051	0	0
BE10.4	WBGene00007212	-0.849356	0.523288	0.622638	10.7751	35.9014	51.3227	22.6751	0	30.7306
BE10.5	WBGene00044127	-3.51234	0.373232	NA	0	0	6.31664	0	0	0
bec-1	WBGene00000247	-0.534791	0.325535	0.427836	192.972	172.894	154.758	88.4882	180.257	93.8991
bed-1	WBGene00012674	1.25454	0.0400405	0.0831754	160.647	54.7969	73.4309	212.925	277.986	198.895
bed-2	WBGene00012943	1.38736	0.00284321	0.00908524	233.134	153.998	133.439	528.164	412.636	419.132
bed-3	WBGene00009133	-5.02166	5.85e-06	4.23e-05	117.547	176.673	45.006	6.08356	4.34353	0
ben-1	WBGene00000248	1.05674	0.133811	0.216845	3718.39	623.551	935.652	3356.47	3737.61	3884.01
best-1	WBGene00007203	-1.09986	0.184491	0.275086	54.8551	33.0671	37.1102	13.8263	32.5765	13.6581
best-10	WBGene00008185	1.63552	0.438869	0.542486	4.89778	7.5582	0	8.29577	0	29.877
best-11	WBGene00008186	-6.56627	0.0186865	0.0444724	0	17.9507	34.7415	0	0	0
best-12	WBGene00008821	-6.54987	0.021503	0.0499117	0	43.4596	8.68537	0	0	0
best-13	WBGene00009323	0.645742	0.388816	0.492413	50.9369	84.0849	22.1082	112.822	65.153	66.583
best-14	WBGene00009340	-1.30632	0.106644	0.18217	80.3236	489.393	236.084	129.967	154.195	42.6814
best-15	WBGene00011258	-6.0764	6.25e-05	0.000333843	25.4685	47.2387	39.479	1.1061	0	0
best-16	WBGene00020046	-5.45719	0.108436	0.184599	0	14.1716	10.2645	0	0	0
best-17	WBGene00020559	-2.47772	0.159181	0.247119	9.79556	42.5148	53.6914	18.2507	0	0
best-18	WBGene00011868	-1.21135	0.0879015	0.156407	50.9369	52.9074	60.008	27.6526	28.233	15.3653
best-19	WBGene00206487	0.0819888	0.870875	0.908024	114.608	217.298	196.605	197.992	199.803	162.189
best-20	WBGene00021368	-9.90691	4.23e-13	1.82e-11	146.933	179.507	207.659	0	0	0
best-21	WBGene00013520	-3.6847	0.00384295	0.0117285	32.3253	240.917	107.383	7.18966	23.8894	0
best-22	WBGene00013921	0.908926	0.123763	0.204326	388.884	194.624	125.543	560.794	436.525	332.915
best-23	WBGene00014989	3.83919	0.00129028	0.00460714	39.1822	0	4.73748	236.706	184.6	204.871
best-24	WBGene00022797	-2.86287	0.00168913	0.00578447	214.523	1030.75	408.213	102.867	115.104	10.2435
best-25	WBGene00014102	-6.29592	0.00647307	0.0182864	7.83645	31.1776	4.73748	0	0	0
best-26	WBGene00014103	-1.47556	0.646743	0.729221	0	47.2387	0	0	17.3741	0
best-3	WBGene00015286	-3.19282	0.155073	0.242526	0	107.704	18.1603	13.2732	0	0
best-4	WBGene00015288	0.0222765	0.995305	0.996638	0	9.44774	0	9.40187	0	0
best-5	WBGene00007404	0.479591	0.80829	0.8608	0	22.6746	18.9499	21.569	36.92	0
best-6	WBGene00015628	-3.61864	0.358616	NA	6.85689	0	0	0	0	0
best-7	WBGene00007808	-3.1045	0.27583	0.374157	0	34.9567	0.789579	3.87136	0	0
best-8	WBGene00007988	-3.13237	0.0619321	0.118587	27.4276	34.0119	18.1603	8.29577	0	0
best-9	WBGene00016613	1.76598	0.190266	0.281565	19.5911	0	23.6874	84.0638	43.4353	19.6335
bet-1	WBGene00022473	1.99252	7.48e-06	5.26e-05	450.596	253.2	292.934	1363.82	1509.38	1093.5
bet-2	WBGene00010199	2.7718	5.2e-09	8.61e-08	251.746	128.489	132.649	1035.31	1174.93	1290.69
bicd-1	WBGene00016611	-1.80648	0.00431325	0.0129217	481.941	1164.91	681.407	164.809	382.231	122.069
bir-1	WBGene00000249	0.499106	0.501972	0.6029	107.751	181.397	80.5371	178.082	54.2942	287.673
bir-2	WBGene00000250	-2.22672	0.166911	0.255865	48.9778	30.2328	68.6934	0.553051	32.5765	0
bkip-1	WBGene00014569	3.10241	0.00325331	0.0101685	60.7325	1.88955	7.89579	241.683	175.913	186.091
bli-1	WBGene00000251	-11.908	2.68e-16	2.22e-14	336.967	1483.3	318.201	0	0	0
bli-2	WBGene00000252	-8.04298	3.26e-12	1.14e-10	726.83	4981.8	596.922	6.08356	19.5459	0
bli-3	WBGene00000253	-4.0603	0.000836538	0.00315331	115.588	317.444	175.287	30.9709	4.34353	0
bli-4	WBGene00000254	-1.87207	0.00176926	0.00602698	593.611	1093.1	855.115	345.657	97.7295	247.552
bli-5	WBGene00000255	-6.79687	3.02e-06	2.37e-05	29.3867	183.286	41.8477	1.65915	0	0
bli-6	WBGene00000256	-12.8044	6.42e-44	2.64e-40	8067.62	31414.7	10649.1	3.31831	4.34353	0
blmp-1	WBGene00003847	-1.97139	0.00380902	0.0116357	77.3849	136.048	77.3788	29.3117	15.2024	28.1697
blos-1	WBGene00011872	-1.07779	0.413189	0.5168	49.9573	69.9133	32.3728	63.6009	6.5153	0.853628
blos-2	WBGene00022251	-0.279558	0.57967	0.672703	138.117	149.274	161.074	139.922	84.6989	142.556
blos-4	WBGene00020783	-0.998336	0.464404	0.567104	23.5093	13.2268	21.3186	9.40187	0	18.7798
bmk-1	WBGene00000257	-4.82608	0.000150663	0.000714854	101.874	163.446	116.858	12.1671	0	0
bmy-1	WBGene00017293	-1.77772	0.113191	0.19072	67.5894	118.097	138.966	34.2892	60.8095	0.853628
bnc-1	WBGene00044791	-7.64623	8.98e-06	6.2e-05	33.3049	23.6194	54.481	0	0	0
bpl-1	WBGene00000259	2.17427	3.93e-05	0.000223728	59.7529	59.5208	112.12	396.538	267.127	380.718
bra-1	WBGene00000262	2.74661	0.00411623	0.0124333	314.437	15.1164	46.5852	595.083	1207.5	721.316
bra-2	WBGene00017757	-1.20287	0.0575547	0.111727	111.669	131.324	225.82	78.5333	36.92	86.2165
brap-2	WBGene00017144	0.225198	0.617238	0.705304	157.708	151.164	122.385	159.832	173.741	170.726
brc-1	WBGene00000264	-2.15852	0.231448	0.323945	18.6116	9.44774	4.73748	4.97746	2.17177	0
brc-2	WBGene00020316	-0.493898	0.685425	0.76112	53.8756	139.827	85.2746	115.588	0	81.0947
brd-1	WBGene00000265	-2.42687	0.0852402	0.152546	19.5911	34.9567	67.9038	1.65915	0	20.4871
bre-1	WBGene00000266	0.792422	0.0744291	0.137198	381.047	278.708	236.874	518.209	425.666	606.93
bre-2	WBGene00000267	1.3676	0.0775616	0.141592	26.448	41.5701	15.7916	70.7905	106.417	40.1205
bre-3	WBGene00000268	-0.234394	0.639312	0.722796	276.235	299.493	232.926	262.699	138.993	282.551
bre-4	WBGene00000269	1.19527	0.0266283	0.0593463	162.606	121.876	79.7475	226.751	234.551	371.328
bre-5	WBGene00000270	-1.85763	0.0106722	0.0279329	80.3236	59.5208	51.3227	12.1671	23.8894	17.9262
brf-1	WBGene00000271	0.801072	0.208356	0.300327	77.3849	51.0178	93.96	85.7229	204.146	100.728
bris-1	WBGene00019726	2.57623	3.55e-05	0.000205175	360.477	101.091	257.403	1106.66	2169.6	1014.11
bro-1	WBGene00000272	2.03706	0.61266	NA	0	0	0	1.65915	0	0
brp-1	WBGene00000273	-1.71611	0.0111756	0.0289966	1102	4768.28	3311.5	1331.75	1020.73	442.179
btb-1	WBGene00001963	-4.90005	0.211439	0.303576	0	0	16.5812	0	0	0
btb-12	WBGene00022555	-4.27233	0.27688	NA	10.7751	0	0	0	0	0
btb-13	WBGene00022561	-3.34572	0.39688	NA	0	5.66865	0	0	0	0
btb-14	WBGene00013275	-2.4637	0.0512244	0.101572	45.0596	169.115	135.018	21.0159	43.4353	0
btb-16	WBGene00018195	-0.577469	0.464101	0.566775	26.448	87.864	52.9018	23.7812	45.6071	43.535
btb-17	WBGene00018200	2.1927	0.198405	0.290423	0	22.6746	0.789579	16.0385	82.5272	9.38991
btb-18	WBGene00018201	4.69822	0.232029	NA	0	0	0	12.7202	0	0
btb-19	WBGene00010194	-2.57866	0.0717045	0.133242	8.816	45.3492	64.7455	2.2122	0	17.0726
btb-2	WBGene00020802	-1.6317	0.452831	0.555901	6.85689	41.5701	0	1.65915	0	13.6581
btb-20	WBGene00010193	-5.3036	0.000194139	0.000891066	33.3049	71.8029	33.1623	2.76526	0	0
btb-21	WBGene00018540	-2.98926	0.279515	0.378096	9.79556	18.8955	0	3.31831	0	0
btb-22	WBGene00269387	-0.239972	0.950375	NA	0	0	4.73748	3.87136	0	0
btb-3	WBGene00015013	-4.1541	0.0547983	0.10748	10.7751	5.66865	11.8437	1.1061	0	0
btb-4	WBGene00019142	-3.35496	0.217721	0.309337	7.83645	0	23.6874	2.76526	0	0
btb-5	WBGene00021042	2.43241	0.11184	0.18918	27.4276	0	8.68537	12.1671	169.398	14.5117
btb-6	WBGene00018438	-4.09486	0.297684	NA	0	0	9.47495	0	0	0
btb-7	WBGene00018443	-5.08661	0.169146	0.258496	0	14.1716	4.73748	0	0	0
btb-8	WBGene00018437	-0.798918	0.844774	NA	0.979556	0	0	0	0	0
btb-9	WBGene00018435	0.036646	0.98139	0.98697	0	17.0059	33.1623	6.08356	32.5765	13.6581
btbd-10	WBGene00019888	0.534432	0.211533	0.303576	645.527	400.584	453.219	784.226	605.923	779.363
btf-1	WBGene00000274	0.339449	0.534325	0.633332	117.547	96.367	159.495	126.096	128.134	217.675
bub-1	WBGene00000275	-5.30634	1.03e-06	9.27e-06	172.402	200.292	331.623	14.3793	2.17177	0
bub-3	WBGene00013209	-1.07196	0.0375105	0.0788761	153.79	222.967	170.549	65.26	106.417	90.4846
bus-1	WBGene00044617	3.75134	0.0945276	0.165723	10.7751	0	0	25.4403	119.447	0
bus-12	WBGene00010442	-8.1313	NA	NA	0	152.109	3.9479	0	0	0
bus-17	WBGene00044630	-5.7692	0.000635466	0.00248182	9.79556	46.2939	33.1623	1.1061	0	0
bus-18	WBGene00044631	-2.77102	0.203693	0.295507	11.7547	34.9567	0	2.76526	4.34353	0
bus-19	WBGene00011590	-2.75851	0.000807812	0.00305764	72.4871	463.884	172.918	27.6526	21.7177	54.6322
bus-2	WBGene00044618	0.514411	0.615974	0.70423	37.2231	96.367	11.8437	90.1473	15.2024	100.728
bus-4	WBGene00044620	-4.90525	7.93e-09	1.25e-07	68.5689	136.048	120.016	2.2122	6.5153	3.41451
bus-8	WBGene00044623	-4.85901	3.4e-06	2.64e-05	184.156	308.941	127.912	14.3793	6.5153	0
byn-1	WBGene00000276	-0.143768	0.740926	0.807649	373.211	443.099	472.169	487.238	382.231	296.209
C01A2.1	WBGene00007213	2.28514	0.264023	0.360849	15.6729	0	0	28.2056	2.17177	45.2423
C01A2.2	WBGene00007214	-1.39743	0.301403	0.402474	41.1413	153.998	77.3788	26.5465	78.1836	0
C01A2.4	WBGene00007216	-0.847494	0.0473342	0.0952358	280.153	232.415	280.301	135.498	152.024	153.653
C01A2.6	WBGene00007218	-5.79177	0.138996	0.223115	0	0	30.7936	0	0	0
C01B10.10	WBGene00015284	-1.68793	0.397323	0.501225	0	18.8955	33.9519	11.6141	0	4.26814
C01B10.11	WBGene00044294	-3.69934	5.27e-08	6.69e-07	273.296	597.097	202.132	39.8197	15.2024	25.6088
C01B10.3	WBGene00015278	-3.15902	0.00614033	0.0174695	273.296	384.523	295.303	42.5849	65.153	0
C01B10.4	WBGene00015279	-2.61166	0.335128	0.438364	7.83645	24.5641	0	4.97746	0	0
C01B10.44	WBGene00194839	-5.54623	0.0986136	0.17119	0	18.8955	7.10622	0	0	0
C01B10.49	WBGene00219792	2.58794	0.518014	NA	0	0	0	2.76526	0	0
C01B10.6	WBGene00015280	-1.72512	0.0299705	0.0655693	80.3236	637.723	250.297	66.9192	136.821	90.4846
C01B10.7	WBGene00015281	-3.75303	0.210497	0.302688	9.79556	0	11.0541	1.1061	0	0
C01B10.8	WBGene00015282	-1.03407	0.282705	0.381846	30.3662	82.1954	209.239	95.6778	45.6071	15.3653
C01B10.9	WBGene00015283	-0.101059	0.865148	0.903427	69.5485	121.876	152.389	75.2149	123.791	122.922
C01B12.8	WBGene00015291	-5.12569	7.47e-07	7.03e-06	207.666	432.707	274.774	6.63661	21.7177	0
C01B12.9	WBGene00022904	5.36804	0.133374	0.216243	0	0	0	3.31831	0	17.0726
C01B9.1	WBGene00007220	0.125447	0.961787	0.973026	0	0	27.6353	6.08356	0	23.9016
C01B9.4	WBGene00194890	-3.74022	0.273287	0.371443	0	0.944774	15.002	0	2.17177	0
C01B9.5	WBGene00194939	-4.30079	0.158044	0.245892	0	8.50297	11.8437	0.553051	0	0
C01B9.7	WBGene00206391	-2.39063	0.548912	NA	2.93867	0	0	0	0	0
C01C10.2	WBGene00015294	-1.40753	0.28054	0.379358	98.9351	114.318	48.1643	63.6009	34.7483	0
C01C4.2	WBGene00015292	-1.0895	0.692442	0.767204	8.816	0	16.5812	11.6141	0	0
C01C4.3	WBGene00015293	2.19324	2.14e-05	0.000132019	333.049	183.286	147.651	1060.2	747.088	1225.81
C01F1.1	WBGene00015296	-1.73978	0.000790636	0.00299884	587.733	1233.88	643.507	180.295	256.269	302.184
C01F1.3	WBGene00015298	-0.186097	0.806666	0.859656	160.647	137.937	75.7996	51.9868	217.177	63.1685
C01F1.4	WBGene00015299	2.22718	0.0294671	0.0646483	100.894	4.72387	14.2124	220.114	125.962	213.407
C01F1.5	WBGene00015300	-3.26734	0.0429447	0.087997	28.4071	158.722	40.2686	22.6751	0	0
C01F1.6	WBGene00015301	2.21883	2.39e-05	0.000145287	239.012	85.9745	160.285	723.391	723.198	811.801
C01F6.14	WBGene00219207	0.686012	0.347505	0.450632	18.6116	34.0119	24.477	38.1605	43.4353	42.6814
C01F6.2	WBGene00007222	-1.92411	0.00233257	0.00767262	95.0169	174.783	105.804	38.1605	21.7177	37.5596
C01F6.9	WBGene00007223	-1.76148	0.00103708	0.00380462	247.828	421.369	386.104	148.218	78.1836	82.8019
C01G10.1	WBGene00007230	-2.34299	0.557171	NA	0	2.83432	0	0	0	0
C01G10.10	WBGene00007237	-0.116717	0.884882	0.918234	24.4889	40.6253	43.4269	18.2507	52.1224	31.5842
C01G10.14	WBGene00007239	-5.61263	0.0924341	0.163131	5.87733	0	21.3186	0	0	0
C01G10.15	WBGene00007240	-1.03342	0.728133	0.797084	4.89778	0	12.6333	8.29577	0	0
C01G10.16	WBGene00007241	-1.71002	NA	NA	664.139	13.2268	33.9519	56.9643	84.6989	75.9729
C01G10.4	WBGene00007231	-1.45448	0.714749	NA	0	2.83432	0	0.553051	0	0
C01G10.5	WBGene00007232	-0.337685	0.931192	NA	0	0	3.15832	2.2122	0	0
C01G10.6	WBGene00007233	3.99426	0.311438	NA	0	0	0	7.74272	0	0
C01G10.7	WBGene00007234	-1.23865	0.0935062	0.164493	75.4258	85.0297	127.122	30.9709	19.5459	69.9975
C01G10.8	WBGene00007235	-0.951909	0.0366535	0.0773806	912.946	922.1	877.223	311.368	447.384	643.636
C01G10.9	WBGene00007236	-2.94171	0.003007	0.00950886	32.3253	175.728	98.6974	5.53051	6.5153	27.3161
C01G12.12	WBGene00044053	-2.58001	0.363925	0.467116	8.816	16.0612	0	3.87136	0	0
C01G12.13	WBGene00044333	-4.80851	0.00689838	0.0193395	7.83645	25.5089	28.4249	1.65915	0	0
C01G12.16	WBGene00219299	1.98104	0.53683	0.635222	0	0	3.9479	1.1061	0	14.5117
C01G12.3	WBGene00007244	-7.45689	4.05e-05	0.000229765	14.6933	53.8521	29.2144	0	0	0
C01G12.7	WBGene00007247	4.26231	2.46e-07	2.62e-06	81.3031	17.0059	8.68537	827.364	766.634	453.277
C01G12.9	WBGene00007249	-6.97297	0.000699135	0.00268477	13.7138	49.1283	7.10622	0	0	0
C01G5.25	WBGene00235291	2.36948	0.0121138	0.0309875	223.339	8.50297	86.8537	637.115	299.704	708.512
C01G5.3	WBGene00015305	-8.90033	1.58e-08	2.3e-07	48.9778	167.225	49.7435	0	0	0
C01G5.4	WBGene00015306	-6.12952	0.010111	0.0267184	2.93867	12.2821	23.6874	0	0	0
C01G5.5	WBGene00015307	1.90084	0.0049662	0.01457	50.9369	40.6253	56.0601	272.654	206.318	72.5584
C01G5.6	WBGene00015308	-2.31604	8.93e-06	6.17e-05	154.77	172.894	219.503	34.8422	34.7483	40.1205
C01G5.7	WBGene00015309	1.99189	0.130479	0.212682	21.5502	0	14.2124	54.199	21.7177	65.7294
C01G5.9	WBGene00015311	1.04132	0.629089	0.714972	3.91822	18.8955	0	10.508	36.92	0
C01G6.10	WBGene00014663	-2.92333	0.456483	NA	7.83645	0	0	0.553051	0	0
C01G6.2	WBGene00007224	-7.71202	7.28e-05	0.000380649	3.91822	66.1342	46.5852	0	0	0
C01G6.3	WBGene00007225	-3.88323	0.00324916	0.0101587	23.5093	63.2999	102.645	9.95492	2.17177	0
C01G6.4	WBGene00007226	1.44587	0.000182685	0.000845504	251.746	315.555	247.138	728.921	699.309	789.606
C01G6.5	WBGene00007227	0.71693	0.11803	0.197005	779.726	1398.27	717.728	1373.23	1637.51	1749.08
C01G6.9	WBGene00007229	-2.9128	0.0497563	0.099163	18.6116	53.8521	16.5812	2.2122	10.8588	0
C01G8.1	WBGene00015312	-7.66177	3.05e-14	1.7e-12	131.26	342.953	382.946	2.2122	2.17177	0
C01H6.2	WBGene00007252	-0.43505	0.766047	0.827357	15.6729	21.7298	27.6353	20.4629	28.233	0
C01H6.3	WBGene00007253	2.80965	0.0186051	0.0443172	11.7547	0	20.5291	106.739	49.9506	69.9975
C01H6.4	WBGene00007254	-1.78331	0.206035	0.297906	14.6933	33.0671	56.8497	11.6141	19.5459	0
C01H6.6	WBGene00007255	-1.76327	0.197671	0.289581	50.9369	32.1223	22.1082	12.1671	19.5459	0
C01H6.8	WBGene00007257	-2.83285	0.229037	0.32128	0	56.6865	17.3707	9.95492	0	0
C01H6.9	WBGene00007258	-4.58914	0.00145563	0.00509761	56.8142	42.5148	27.6353	4.42441	0	0
C02B10.3	WBGene00015328	2.36722	0.000165235	0.000775496	1563.37	496.007	405.844	3418.41	3967.82	5330.91
C02B10.4	WBGene00015329	-0.0474206	0.931356	0.951544	189.054	212.574	117.647	143.24	123.791	233.894
C02B10.5	WBGene00015330	0.212074	0.650175	0.732008	431.984	258.868	322.938	440.782	288.845	442.179
C02B10.6	WBGene00015331	-5.12597	0.0860296	0.153724	0.979556	11.3373	7.10622	0	0	0
C02B4.4	WBGene00045386	2.0693	0.0117284	0.0301786	195.911	46.2939	26.8457	572.408	264.956	289.38
C02B8.1	WBGene00015320	-0.92816	0.72098	0.791308	18.6116	20.785	0	0	0	20.4871
C02B8.12	WBGene00219375	-2.22145	0.386523	0.490005	9.79556	0	33.1623	8.84882	0	0
C02B8.3	WBGene00015322	2.44785	7.44e-05	0.000387966	117.547	68.9685	49.7435	600.613	221.52	462.667
C02B8.6	WBGene00015324	1.22281	0.155296	0.242788	49.9573	25.5089	8.68537	60.8356	49.9506	84.5092
C02C6.13	WBGene00219794	1.05137	0.796119	NA	0	0	0	0.553051	0	0
C02C6.8	WBGene00199517	4.79031	0.222831	NA	0	0	0	0	0	13.6581
C02D4.12	WBGene00199850	4.20326	0.28616	NA	0	0	0	2.2122	0	6.82903
C02D4.15	WBGene00201167	-0.798918	0.844774	NA	0	0.944774	0	0	0	0
C02D5.2	WBGene00015336	-0.240192	0.656206	0.737084	135.179	81.2506	103.435	80.1924	106.417	85.3628
C02D5.4	WBGene00043097	-0.740294	0.0978514	0.17028	259.582	380.744	294.513	158.173	191.116	210.846
C02E7.10	WBGene00015342	1.61916	0.688888	NA	0	0	0	1.1061	0	0
C02E7.6	WBGene00015339	-8.88707	3.41e-23	7.79e-21	1695.61	5852.88	1964.47	1.1061	4.34353	14.5117
C02E7.7	WBGene00015340	-8.71048	1.24e-23	3.01e-21	2408.73	4157.01	1406.24	0.553051	13.0306	7.68265
C02F12.5	WBGene00015355	-2.13843	0.0233214	0.0533866	44.08	117.152	103.435	5.53051	43.4353	13.6581
C02F12.8	WBGene00015357	1.0295	0.12875	0.210551	97.9556	51.0178	112.12	82.9577	277.986	174.994
C02F12.9	WBGene00015358	2.58981	0.182241	0.272781	10.7751	0	0	29.3117	6.5153	28.1697
C02F4.10	WBGene00196852	0.775561	0.83973	NA	0	0	3.9479	6.63661	0	0
C02F4.12	WBGene00220252	6.18343	0.00926837	0.0248233	0	0	0	18.8037	13.0306	4.26814
C02F4.4	WBGene00007264	-3.43135	0.00147257	0.00514851	56.8142	373.186	53.6914	2.76526	28.233	15.3653
C02F5.10	WBGene00015351	-5.5266	0.000147202	0.000703172	17.632	146.44	51.3227	3.87136	0	0
C02F5.12	WBGene00015352	0.796751	0.278247	0.376691	41.1413	30.2328	87.6433	70.7905	65.153	139.995
C02F5.13	WBGene00015353	0.67489	0.409511	0.513214	24.4889	17.9507	60.7976	58.6234	34.7483	70.8512
C02F5.14	WBGene00044445	-5.21932	0.000254847	0.00112483	22.5298	273.985	134.229	10.508	0	0
C02F5.2	WBGene00015345	-6.06897	0.0456119	0.0923693	0	25.5089	11.8437	0	0	0
C02F5.3	WBGene00015346	-0.223517	0.658635	0.739156	233.134	454.436	419.267	339.02	228.036	379.011
C02F5.5	WBGene00015348	-8.42988	9.3e-08	1.11e-06	58.7733	35.9014	97.1183	0	0	0
C02F5.7	WBGene00015350	1.59757	0.0023746	0.0077854	989.351	415.701	396.369	2031.36	1776.51	1642.38
C02G6.1	WBGene00015359	-2.63279	0.315161	0.417088	15.6729	20.785	0	5.53051	0	0
C02G6.2	WBGene00015360	-4.62086	0.238999	NA	13.7138	0	0	0	0	0
C02G6.3	WBGene00044803	-0.408961	0.841975	0.885864	8.816	24.5641	7.10622	29.8648	0	0
C02H6.1	WBGene00015361	5.48699	0.161688	0.250166	0	0	0	0	0	22.1943
C02H6.3	WBGene00220257	5.53118	0.103914	0.178525	0	0	0	8.29577	0	14.5117
C03A3.1	WBGene00007266	1.47322	0.13083	0.213127	164.565	23.6194	28.4249	243.342	47.7789	308.16
C03A3.2	WBGene00007267	0.423538	0.415184	0.518665	224.318	251.31	206.87	340.679	169.398	402.059
C03A3.3	WBGene00007268	3.12745	0.0569882	0.110915	22.5298	0	0	39.8197	76.0119	80.2411
C03A3.9	WBGene00284849	-1.80133	0.186894	0.2779	29.3867	85.9745	19.7395	5.53051	0	32.4379
C03A7.2	WBGene00015366	-2.80807	0.479154	NA	3.91822	0	0	0	0	0
C03B1.1	WBGene00015372	2.3444	0.558942	NA	0	0	0	2.2122	0	0
C03B1.10	WBGene00015380	4.69839	0.0932226	0.164258	1.95911	0	0	0.553051	49.9506	0
C03B1.13	WBGene00015381	-1.34763	0.44808	0.551024	0.979556	50.073	15.7916	2.76526	0	23.048
C03B1.14	WBGene00015382	-4.72403	0.00664655	0.0187058	20.5707	24.5641	13.4229	1.65915	0	0
C03B1.16	WBGene00202206	-1.53135	0.7056	NA	0	0	1.57916	0	0	0
C03B1.2	WBGene00015373	1.14605	0.39771	0.501483	19.5911	0	23.6874	32.63	32.5765	30.7306
C03B1.3	WBGene00015374	2.03706	0.61266	NA	0	0	0	1.65915	0	0
C03B1.4	WBGene00015375	2.80872	0.481926	NA	0	0	0	3.31831	0	0
C03B1.5	WBGene00015376	2.72317	0.144232	0.229482	9.79556	0	0	16.0385	30.4047	17.9262
C03B1.6	WBGene00015377	7.26843	0.00499788	0.0146473	0	0	0	39.8197	36.92	0
C03B1.7	WBGene00015378	-0.54129	0.502182	0.602985	50.9369	37.791	22.1082	27.0995	17.3741	30.7306
C03B8.3	WBGene00015386	-5.17287	0.00271758	0.00874155	5.87733	73.6924	7.10622	1.1061	0	0.853628
C03C10.2	WBGene00007269	-5.64486	0.028746	0.0633471	10.7751	2.83432	14.2124	0	0	0
C03C10.4	WBGene00007270	-2.64923	2.08e-05	0.000128797	145.954	188.955	175.287	39.2666	26.0612	15.3653
C03C10.5	WBGene00007271	4.03609	0.306262	NA	0	0	0	3.87136	4.34353	0
C03C11.1	WBGene00007274	-0.528786	0.621445	0.708586	10.7751	81.2506	56.8497	25.9934	69.4966	9.38991
C03C11.7	WBGene00200034	3.37306	0.395127	NA	0	0	0	4.97746	0	0
C03C11.8	WBGene00200507	1.05137	0.796119	NA	0	0	0	0.553051	0	0
C03D6.1	WBGene00007275	-1.54682	0.222774	0.314784	23.5093	32.1223	75.0101	12.1671	0	31.5842
C03D6.9	WBGene00219796	-3.81183	0.332998	NA	7.83645	0	0	0	0	0
C03E10.3	WBGene00007281	2.36815	0.212675	0.304709	9.79556	4.72387	0	38.1605	0	35.8524
C03E10.8	WBGene00195286	1.05137	0.796119	NA	0	0	0	0.553051	0	0
C03F11.2	WBGene00015388	-3.20171	0.0838117	0.150727	83.2622	4.72387	15.002	10.508	0	0
C03F11.4	WBGene00015390	0.560353	0.400078	0.503734	86.2009	134.158	54.481	91.8065	99.9013	212.553
C03G5.14	WBGene00219371	5.82824	0.0199875	0.0469305	0	0	0	10.508	6.5153	11.0972
C03G6.17	WBGene00015402	2.24956	0.0172238	0.0414956	19.5911	35.9014	18.1603	210.159	121.619	17.9262
C03G6.5	WBGene00015393	1.44894	0.237942	0.330886	4.89778	81.2506	5.52706	138.263	91.2142	20.4871
C03G6.6	WBGene00015394	1.05137	0.796119	NA	0	0	0	0.553051	0	0
C03H12.1	WBGene00007284	-1.83146	0.103616	0.178256	75.4258	158.722	77.3788	33.1831	0	52.925
C03H5.10	WBGene00255736	1.13744	0.690368	0.765318	0	9.44774	0	9.40187	0	11.0972
C03H5.3	WBGene00015405	-0.812209	0.112089	0.189483	111.669	134.158	173.707	77.9802	84.6989	76.8265
C03H5.4	WBGene00015406	-1.67067	0.663405	0.743039	0	0	11.0541	3.31831	0	0
C03H5.5	WBGene00015407	-2.19099	0.0807036	0.145973	73.4667	45.3492	105.804	27.6526	21.7177	0
C03H5.6	WBGene00015408	3.8615	2.76e-10	6.26e-09	358.517	107.704	102.645	2793.46	2462.78	3006.48
C03H5.7	WBGene00015409	2.90921	0.213367	0.30542	10.7751	0	0	64.707	0	15.3653
C03H5.9	WBGene00206366	6.79151	0.0115689	0.0298336	0	0	0	37.6075	0	17.0726
C04A11.1	WBGene00007285	1.10925	0.0388859	0.0812695	93.0578	58.576	100.277	163.703	147.68	231.333
C04A11.2	WBGene00007286	-0.0377253	0.992129	NA	5.87733	0	0	5.53051	0	0
C04A11.5	WBGene00007288	0.54747	0.803895	0.857258	11.7547	8.50297	0	2.76526	0	26.4625
C04A2.15	WBGene00206529	3.02254	0.447882	NA	0	0	0	3.87136	0	0
C04B4.1	WBGene00007289	-4.62086	0.238999	NA	13.7138	0	0	0	0	0
C04B4.2	WBGene00007290	-7.04069	0.00750262	0.0207635	0	56.6865	16.5812	0	0	0
C04B4.4	WBGene00007292	4.78638	0.223218	NA	0	0	0	1.65915	0	11.9508
C04C11.1	WBGene00007295	0.575311	0.501991	0.6029	65.6302	27.3985	24.477	51.9868	99.9013	24.7552
C04C11.17	WBGene00200450	1.05137	0.796119	NA	0	0	0	0.553051	0	0
C04C11.21	WBGene00201909	4.07898	0.301016	NA	0	0	0	0	8.68707	0
C04C11.25	WBGene00284855	-6.71506	0.0191135	0.0453231	3.91822	0	54.481	0	0	0
C04C11.7	WBGene00195987	1.05137	0.796119	NA	0	0	0	0.553051	0	0
C04C3.12	WBGene00198367	1.61916	0.688888	NA	0	0	0	1.1061	0	0
C04C3.14	WBGene00219410	-3.35412	0.395665	NA	0.979556	4.72387	0	0	0	0
C04C3.4	WBGene00015414	-5.15112	0.188705	0.279783	0	0	19.7395	0	0	0
C04C3.6	WBGene00015416	1.10252	0.491927	0.593052	36.2436	0	17.3707	68.5783	2.17177	43.535
C04C3.9	WBGene00195067	-6.52335	0.00213439	0.00708736	18.6116	25.5089	7.10622	0	0	0
C04D8.4	WBGene00201566	1.61916	0.688888	NA	0	0	0	1.1061	0	0
C04E12.10	WBGene00015439	1.38262	0.730349	NA	0	0	0.789579	2.2122	0	0
C04E12.2	WBGene00015433	-4.85783	0.0260748	0.0583308	32.3253	0	27.6353	0.553051	2.17177	0
C04E12.4	WBGene00015434	-2.59969	0.126662	0.208006	20.5707	147.385	41.8477	33.7361	0	0
C04E12.5	WBGene00015435	-5.23864	0.144091	0.229325	6.85689	14.1716	0	0	0	0
C04E6.11	WBGene00015425	-1.0506	0.293546	0.393869	12.7342	30.2328	40.2686	14.9324	6.5153	17.9262
C04E6.12	WBGene00015426	2.41704	0.206107	0.297957	0	9.44774	3.9479	21.569	0	49.5104
C04E6.13	WBGene00015427	1.17715	0.0580887	0.112551	503.492	189.9	133.439	600.06	727.542	542.054
C04E6.4	WBGene00015421	1.65181	0.575122	0.668983	0	0	7.10622	3.31831	19.5459	0
C04E6.5	WBGene00015422	-2.74504	0.278213	0.376691	0	44.4044	6.31664	7.18966	0	0
C04E6.7	WBGene00015423	2.06811	0.00267841	0.00862754	206.686	38.7358	123.964	382.711	705.824	461.813
C04E6.8	WBGene00015424	0.0696266	0.952643	0.966867	368.313	26.4537	20.5291	95.1248	306.219	35.8524
C04E7.1	WBGene00015428	-1.80112	0.654845	NA	1.95911	0	0	0	0	0
C04E7.3	WBGene00015430	1.46367	0.0192163	0.0455051	56.8142	121.876	63.9559	269.889	277.986	122.069
C04E7.5	WBGene00045270	-6.46068	0.0256156	0.0575102	41.1413	0	7.89579	0	0	0
C04F1.1	WBGene00015442	-6.83911	0.0104651	0.0274605	0	36.8462	26.8457	0	0	0
C04F1.5	WBGene00201925	1.05137	0.796119	NA	0	0	0	0.553051	0	0
C04F12.1	WBGene00007297	-1.82258	0.026523	0.0591658	239.991	85.0297	198.184	65.26	71.6683	11.9508
C04F12.12	WBGene00077685	-5.9965	0.0111244	0.0289049	16.6524	14.1716	4.73748	0	0	0
C04F12.16	WBGene00219286	-1.4992	0.335368	0.438642	6.85689	32.1223	18.9499	9.95492	10.8588	0
C04F12.5	WBGene00007299	0.611391	0.279891	0.378511	168.484	85.9745	167.391	177.529	304.047	165.604
C04F12.6	WBGene00007300	-6.05436	0.0116879	0.0300932	22.5298	11.3373	3.15832	0	0	0
C04F12.7	WBGene00007301	-5.7757	3.97e-13	1.72e-11	183.177	607.49	641.928	7.18966	2.17177	15.3653
C04F12.8	WBGene00007302	1.14433	0.155751	0.243222	165.545	20.785	86.8537	261.04	221.52	121.215
C04F5.2	WBGene00015444	1.07339	0.621772	0.708849	0	0	14.2124	7.74272	8.68707	13.6581
C04F5.8	WBGene00015450	-1.64384	0.00526367	0.0153306	186.116	195.568	150.81	51.9868	86.8707	34.1451
C04F5.9	WBGene00015451	-0.738927	0.444123	0.54751	47.0187	34.9567	66.3247	35.9483	4.34353	46.9496
C04F6.7	WBGene00195081	2.19174	0.270587	0.368382	10.7751	0	0	19.9098	10.8588	17.9262
C04G2.10	WBGene00007309	-6.64702	5.02e-10	1.06e-08	184.156	300.438	145.283	4.97746	0	0
C04G2.12	WBGene00045104	-4.34714	0.268419	NA	0	11.3373	0	0	0	0
C04G2.14	WBGene00255426	-8.08631	9.91e-07	8.97e-06	36.2436	31.1776	83.6954	0	0	0
C04G2.2	WBGene00007305	-2.53251	0.0353563	0.0751144	20.5707	38.7358	63.9559	6.63661	0	13.6581
C04G2.3	WBGene00014665	-8.75877	5.61e-10	1.17e-08	66.6098	251.31	140.545	0.553051	0	0
C04G2.5	WBGene00007306	-5.83806	0.00237194	0.00777879	9.79556	38.7358	16.5812	0	2.17177	0
C04G2.8	WBGene00007307	-7.37035	1.31e-18	1.64e-16	321.294	754.875	494.277	1.65915	0	6.82903
C04G2.9	WBGene00007308	-10.1252	1.24e-21	2.29e-19	517.205	1163.02	1066.72	1.65915	0	0
C04G6.10	WBGene00015458	-8.17859	1.7e-06	1.42e-05	106.772	29.288	25.2665	0	0	0
C04G6.13	WBGene00077489	-3.87307	0.192794	0.284641	0	17.9507	4.73748	1.1061	0	0
C04G6.14	WBGene00199205	-3.83281	0.330291	NA	0	0	7.89579	0	0	0
C04G6.15	WBGene00269376	1.05137	0.796119	NA	0	0	0	0.553051	0	0
C04G6.2	WBGene00015453	-8.06466	1.92e-11	5.48e-10	134.199	526.239	150.02	2.2122	0	0
C04G6.4	WBGene00015454	1.21866	0.0616423	0.118156	80.3236	35.9014	75.7996	167.021	82.5272	195.481
C04G6.5	WBGene00015455	-1.78436	0.0770601	0.140958	55.8347	55.7417	52.9018	2.2122	21.7177	24.7552
C04G6.6	WBGene00015456	-4.60698	0.0209271	0.0488161	6.85689	13.2268	18.9499	1.1061	0	0
C04G6.7	WBGene00015457	-8.67402	1.42e-08	2.09e-07	90.1191	95.4222	41.8477	0	0	0
C04H4.1	WBGene00007311	1.6966	0.509315	0.609903	14.6933	0	0	21.569	26.0612	0
C04H4.4	WBGene00196523	1.05137	0.796119	NA	0	0	0	0.553051	0	0
C04H4.6	WBGene00198436	-4.46273	0.255701	NA	0	12.2821	0	0	0	0
C04H5.1	WBGene00007312	0.88585	0.242358	0.335819	77.3849	39.6805	45.006	142.687	34.7483	119.508
C04H5.7	WBGene00007315	-5.96816	0.0101736	0.02685	8.816	14.1716	11.8437	0	0	0
C04H5.9	WBGene00044054	1.05137	0.796119	NA	0	0	0	0.553051	0	0
C05A9.2	WBGene00007317	1.35318	0.112246	0.189632	131.26	65.1894	59.2185	293.117	34.7483	322.672
C05B5.10	WBGene00044130	2.25475	0.398414	0.5021	0	0	7.10622	4.97746	0	29.0234
C05B5.12	WBGene00194886	-5.16592	0.054671	0.107275	10.7751	26.4537	0	0.553051	0	0
C05B5.13	WBGene00197652	5.81282	0.137916	0.221839	0	0	0	0	28.233	0
C05B5.16	WBGene00219280	2.01156	0.496949	0.59788	0	0	5.52706	3.31831	19.5459	0
C05B5.17	WBGene00219314	-3.68146	0.350152	NA	0	0	7.10622	0	0	0
C05B5.2	WBGene00007320	-9.38693	1.59e-10	3.85e-09	63.6711	183.286	125.543	0	0	0
C05B5.4	WBGene00007321	1.25359	0.639417	0.722839	6.85689	0	7.89579	34.8422	0	0
C05B5.5	WBGene00007322	-5.12008	0.0422838	0.0869031	0	48.1835	6.31664	1.1061	0	0
C05B5.8	WBGene00007324	-4.39811	2.99e-05	0.000177169	55.8347	421.369	152.389	13.8263	0	14.5117
C05C10.2	WBGene00007329	-0.202794	0.745912	0.811041	88.16	141.716	121.595	103.421	52.1224	147.678
C05C10.3	WBGene00007330	-0.25731	0.580769	0.673646	555.408	505.454	829.848	606.697	601.58	374.743
C05C10.5	WBGene00007332	-3.63529	0.00753181	0.0208407	46.0391	164.391	109.752	1.65915	26.0612	0
C05C10.7	WBGene00007334	-4.02562	0.109291	0.185765	47.0187	0	13.4229	0	4.34353	0
C05C12.1	WBGene00007335	-6.96409	0.000999211	0.00368406	4.89778	51.9626	12.6333	0	0	0
C05C12.4	WBGene00007336	-1.07624	0.228602	0.320917	28.4071	269.261	204.501	36.5014	78.1836	123.776
C05C12.5	WBGene00007337	-4.9198	0.000448996	0.00184373	30.3662	44.4044	67.9038	3.87136	0	0
C05C12.6	WBGene00007338	1.60612	0.0553944	0.108429	16.6524	81.2506	17.3707	154.854	93.386	101.582
C05C8.1	WBGene00015460	-1.8235	0.00712256	0.0198716	122.444	191.789	119.227	37.0544	67.3248	20.4871
C05C8.10	WBGene00197520	4.90258	0.211979	0.303989	0	0	0	1.1061	0	13.6581
C05C8.2	WBGene00015461	-1.20992	0.0241939	0.054933	192.972	153.998	195.026	54.7521	73.8401	105.85
C05C8.5	WBGene00015462	-1.25892	0.0792084	0.14388	53.8756	72.7476	84.485	44.7971	21.7177	20.4871
C05C8.7	WBGene00015464	-1.83511	0.000130298	0.000632645	250.766	439.32	358.469	110.61	91.2142	91.3382
C05C8.8	WBGene00015465	-0.127514	0.960366	0.972007	37.2231	0	0	25.9934	0	7.68265
C05C9.1	WBGene00007325	0.441667	0.777292	0.836154	5.87733	13.2268	6.31664	13.2732	0	20.4871
C05C9.2	WBGene00007326	3.36971	0.0983365	0.170835	7.83645	0.944774	0	40.3727	49.9506	0
C05C9.3	WBGene00007327	-1.08131	0.741879	0.80826	33.3049	0	0	15.4854	0	0
C05D10.2	WBGene00015478	2.77651	0.000953683	0.00353574	185.136	19.8403	32.3728	507.701	662.389	454.984
C05D10.4	WBGene00015480	-1.2342	0.00819387	0.0223679	289.949	298.549	397.158	168.681	106.417	141.702
C05D11.1	WBGene00015481	-0.775344	0.0809345	0.146337	711.158	486.559	784.842	389.348	306.219	460.959
C05D11.13	WBGene00015488	0.610858	0.313817	0.41581	100.894	147.385	66.3247	129.414	234.551	118.654
C05D11.5	WBGene00015483	-2.96337	0.0651467	0.123449	35.264	68.9685	32.3728	16.5915	0	0
C05D11.8	WBGene00015485	-0.264288	0.669546	0.74849	103.833	60.4656	85.2746	62.4948	97.7295	49.5104
C05D11.9	WBGene00015486	-0.959414	0.133277	0.21615	71.5076	98.2565	105.014	38.7136	71.6683	33.2915
C05D12.1	WBGene00007339	-4.2155	0.00056267	0.00223735	25.4685	137.937	26.8457	6.63661	2.17177	0.853628
C05D12.2	WBGene00007340	1.69956	0.0964706	0.168483	3.91822	15.1164	49.7435	115.588	67.3248	40.9742
C05D12.3	WBGene00014666	-3.65917	0.000380471	0.0015954	59.7529	211.629	142.914	21.569	0	9.38991
C05D12.4	WBGene00007341	5.9686	0.0764965	0.140208	0	0	0	1.1061	30.4047	0
C05D12.7	WBGene00044029	1.66188	0.0128466	0.0325368	219.42	47.2387	127.912	515.444	445.212	287.673
C05D2.10	WBGene00015470	1.1276	0.0280473	0.0620383	468.228	234.304	327.675	520.974	1029.42	703.39
C05D2.12	WBGene00195279	1.05137	0.796119	NA	0	0	0	0.553051	0	0
C05D2.8	WBGene00015469	-2.43849	0.00777869	0.0214086	32.3253	353.346	90.0121	29.8648	26.0612	31.5842
C05D9.12	WBGene00219800	-2.60422	0.129194	0.211131	3.91822	32.1223	9.47495	1.1061	0	5.9754
C05D9.3	WBGene00015472	-1.46805	0.00976735	0.0259568	600.468	442.154	282.669	218.455	167.226	93.0455
C05D9.4	WBGene00015473	1.58394	0.530928	0.630097	14.6933	0	0	17.1446	0	26.4625
C05D9.7	WBGene00015474	1.51674	0.00599359	0.0171141	115.588	69.9133	58.4289	244.449	169.398	281.697
C05D9.9	WBGene00015476	-1.4637	0.258478	0.354448	28.4071	138.882	52.1122	61.9417	0	16.2189
C05E11.16	WBGene00200780	1.61916	0.688888	NA	0	0	0	1.1061	0	0
C05E11.2	WBGene00015493	1.05137	0.796119	NA	0	0	0	0.553051	0	0
C05E11.3	WBGene00015494	3.73033	9.13e-08	1.09e-06	165.545	39.6805	62.3768	994.939	662.389	1889.93
C05E11.6	WBGene00015495	1.34781	0.30615	0.407721	68.5689	0	22.1082	58.0704	110.76	62.3149
C05E11.9	WBGene00195372	1.05137	0.796119	NA	0	0	0	0.553051	0	0
C05E4.15	WBGene00206359	-0.535833	0.889206	NA	5.87733	0	0	3.87136	0	0
C05E7.1	WBGene00007343	-1.58484	0.0252563	0.0568615	229.216	799.279	223.451	138.263	80.3554	197.188
C05E7.2	WBGene00007344	-8.9277	1.93e-15	1.35e-13	231.175	1134.67	450.06	2.76526	0	0
C05E7.3	WBGene00007345	2.61902	0.00195098	0.00656177	179.259	28.3432	26.8457	584.022	597.236	257.796
C05G5.1	WBGene00007347	0.780831	0.264816	0.361843	46.0391	101.091	42.6373	161.491	65.153	97.3136
C05G5.2	WBGene00007348	0.340261	0.72386	0.793781	6.85689	63.2999	75.7996	61.9417	36.92	85.3628
C05G5.3	WBGene00007349	2.64554	3.11e-05	0.00018278	70.528	36.8462	41.8477	183.06	512.537	240.723
C05G5.5	WBGene00007351	3.34088	0.0449936	0.0913759	11.7547	0	0	29.8648	36.92	51.2177
C05G5.7	WBGene00050939	-6.25972	0.00400112	0.0121481	48.9778	72.7476	0	1.1061	0	0
C05G5.9	WBGene00197186	2.3444	0.558942	NA	0	0	0	2.2122	0	0
C05H8.3	WBGene00045089	-3.81183	0.332998	NA	7.83645	0	0	0	0	0
C06A1.12	WBGene00219803	-4.22913	0.132849	0.215568	0	23.6194	5.52706	1.1061	0	0
C06A1.2	WBGene00007353	0.74611	0.324139	0.426294	390.843	109.594	71.0622	466.222	230.207	260.357
C06A1.3	WBGene00007354	-3.32907	0.011329	0.0293345	30.3662	62.3551	71.0622	2.76526	15.2024	0
C06A1.4	WBGene00014667	-3.34953	0.00402555	0.0122133	98.9351	138.882	150.02	9.40187	30.4047	0
C06A1.6	WBGene00007356	-5.81478	0.13742	0.22132	31.3458	0	0	0	0	0
C06A1.7	WBGene00044235	-6.47252	0.0019001	0.00642085	14.6933	14.1716	20.5291	0	0	0
C06A12.19	WBGene00255702	-4.41578	0.260814	NA	0	0	11.8437	0	0	0
C06A12.3	WBGene00007357	-1.5248	0.0355713	0.075503	299.744	121.876	174.497	124.99	39.0918	40.9742
C06A12.8	WBGene00007359	-4.62086	0.238999	NA	13.7138	0	0	0	0	0
C06A5.1	WBGene00015499	-0.337869	0.636616	0.720548	124.404	177.618	41.0581	108.951	67.3248	93.8991
C06A5.12	WBGene00044414	4.84374	0.217617	0.309254	0	0	0	2.2122	0	11.9508
C06A5.2	WBGene00015500	-6.09787	0.0459295	0.0928981	9.79556	28.3432	0	0	0	0
C06A5.3	WBGene00015501	1.88587	1.77e-05	0.000111422	200.809	268.316	147.651	788.651	770.977	718.755
C06A5.6	WBGene00015504	-2.90668	0.000135281	0.000653369	77.3849	150.219	129.491	25.9934	13.0306	7.68265
C06A5.8	WBGene00015505	-7.10379	5.33e-08	6.75e-07	90.1191	70.8581	73.4309	1.1061	0	0
C06A6.2	WBGene00015507	0.46182	0.344924	0.448041	147.913	136.992	148.441	223.986	134.65	235.601
C06A6.4	WBGene00015509	-2.07668	0.00127704	0.00456383	299.744	578.202	829.058	225.645	89.0425	87.9237
C06A6.5	WBGene00015510	-3.20558	0.00927777	0.0248363	185.136	511.123	210.028	75.768	21.7177	0
C06A6.7	WBGene00015511	1.28382	0.385993	0.489465	0	10.3925	15.7916	14.9324	36.92	12.8044
C06A8.15	WBGene00201117	1.05137	0.796119	NA	0	0	0	0.553051	0	0
C06A8.3	WBGene00015514	-3.88284	1.55e-09	2.89e-08	3397.1	10690.1	6984.62	725.05	492.991	209.993
C06A8.6	WBGene00015516	-2.58291	0.00181346	0.00615634	45.0596	173.838	80.5371	9.40187	23.8894	17.9262
C06A8.8	WBGene00015517	2.23122	1.43e-06	1.23e-05	121.465	89.7536	122.385	556.369	377.887	629.978
C06B3.1	WBGene00007360	5.42984	0.166162	0.255097	0	0	0	0	21.7177	0
C06B3.16	WBGene00189947	-4.5452	0.246891	NA	5.87733	0	7.10622	0	0	0
C06B3.6	WBGene00007365	0.035455	0.948064	0.963706	334.029	889.977	382.156	597.295	506.022	542.054
C06B3.7	WBGene00007366	0.341593	0.745211	0.810689	13.7138	18.8955	10.2645	9.40187	13.0306	31.5842
C06B8.2	WBGene00007368	-8.44771	1.21e-06	1.07e-05	20.5707	144.55	29.2144	0	0	0
C06B8.3	WBGene00007369	1.61916	0.688888	NA	0	0	0	1.1061	0	0
C06B8.7	WBGene00007372	-2.99936	0.00341463	0.0105942	92.0782	89.7536	13.4229	8.29577	4.34353	11.0972
C06C3.10	WBGene00044169	-2.47327	0.30645	0.407988	28.4071	64.2447	0	0	17.3741	0
C06C3.11	WBGene00045404	-2.3765	0.542229	NA	0	0	7.89579	1.1061	0	0
C06C3.12	WBGene00175031	-0.626528	0.872278	NA	3.91822	0	0	2.2122	0	0
C06C3.14	WBGene00206526	-1.90413	0.558441	0.65444	0	8.50297	4.73748	3.31831	0	0
C06C3.3	WBGene00007374	-2.36405	0.341833	0.445081	36.2436	0	14.2124	9.40187	0	0
C06C3.4	WBGene00007375	-4.10987	0.0567105	0.110479	6.85689	67.079	0	2.2122	2.17177	0
C06C3.5	WBGene00007376	3.20849	0.419412	NA	0	0	0	4.42441	0	0
C06C3.8	WBGene00007378	1.21709	0.66701	0.746006	0	0	10.2645	3.31831	0	20.4871
C06C3.9	WBGene00014668	1.61916	0.688888	NA	0	0	0	1.1061	0	0
C06C6.6	WBGene00007380	-3.98219	0.311426	NA	8.816	0	0	0	0	0
C06C6.7	WBGene00007381	-6.46015	0.00266361	0.00859238	8.816	28.3432	11.8437	0	0	0
C06C6.8	WBGene00007382	-8.4685	1.15e-07	1.32e-06	41.1413	113.373	42.6373	0	0	0
C06E1.1	WBGene00015518	-6.48077	0.000195588	0.000896219	9.79556	49.1283	34.7415	0.553051	0	0
C06E1.11	WBGene00015526	-1.83617	0.582072	0.674679	9.79556	2.83432	0	3.31831	0	0
C06E1.7	WBGene00015522	-0.994265	0.705958	0.778092	0	38.7358	0	5.53051	0	13.6581
C06E1.9	WBGene00015524	-0.63053	0.441771	0.545335	81.3031	113.373	68.6934	61.9417	13.0306	93.0455
C06E2.1	WBGene00015527	-1.157	0.277928	0.376475	262.521	90.6983	18.1603	81.8516	73.8401	11.0972
C06E2.11	WBGene00197211	1.27791	0.753072	NA	0	0	0	0	2.17177	0
C06E2.12	WBGene00197244	5.42984	0.166162	0.255097	0	0	0	0	21.7177	0
C06E2.2	WBGene00015528	-2.84538	0.444132	0.54751	21.5502	0	0	2.76526	0	0
C06E2.5	WBGene00015529	-3.56526	0.0844983	0.151564	15.6729	7.5582	8.68537	2.2122	0	0
C06E2.9	WBGene00044579	-3.08212	0.4361	NA	0	4.72387	0	0	0	0
C06E4.1	WBGene00015530	-4.22148	0.282736	NA	0	10.3925	0	0	0	0
C06E4.18	WBGene00199812	1.05137	0.796119	NA	0	0	0	0.553051	0	0
C06E4.2	WBGene00015531	0.601864	0.382678	0.486239	71.5076	46.2939	87.6433	141.028	45.6071	122.922
C06E4.3	WBGene00015532	-4.62525	0.206717	0.298577	25.4685	0	0	0.553051	0	0
C06E4.4	WBGene00015533	1.05137	0.796119	NA	0	0	0	0.553051	0	0
C06E4.5	WBGene00015534	2.81463	0.480968	NA	0	0	0	0	0	3.41451
C06E4.6	WBGene00015535	3.17539	0.0597866	0.115244	7.83645	0	0.789579	7.18966	60.8095	10.2435
C06E4.8	WBGene00015537	-2.09303	0.432223	0.535973	0	27.3985	7.10622	7.74272	0	0
C06E7.2	WBGene00015539	1.31903	0.0031571	0.00991111	736.626	456.326	465.852	1398.67	1064.17	1673.11
C06E7.4	WBGene00015541	-5.58556	2.1e-07	2.28e-06	85.2214	382.634	154.758	8.29577	4.34353	0
C06E7.88	WBGene00189995	-3.61864	0.358616	NA	6.85689	0	0	0	0	0
C06E7.92	WBGene00200982	1.05137	0.796119	NA	0	0	0	0.553051	0	0
C06E8.5	WBGene00015544	-5.442	7.16e-05	0.000375497	25.4685	139.827	217.134	7.74272	0	0
C06G1.1	WBGene00015545	-5.16942	5.3e-07	5.21e-06	297.785	1105.39	469.01	8.84882	0	41.8278
C06G1.10	WBGene00197189	0.142126	0.971696	NA	0	0	1.57916	0.553051	0	0.853628
C06G1.15	WBGene00199612	4.79031	0.222831	NA	0	0	0	0	0	13.6581
C06G1.16	WBGene00201203	5.05651	0.186762	0.277825	0	0	0	2.76526	0	13.6581
C06G1.2	WBGene00015546	-4.33114	0.000383849	0.00160711	37.2231	109.594	78.1684	8.29577	2.17177	0
C06G3.3	WBGene00015549	0.952562	0.633103	0.717997	10.7751	0	22.1082	39.8197	23.8894	0
C06G3.4	WBGene00015550	2.03706	0.61266	NA	0	0	0	1.65915	0	0
C06G3.5	WBGene00015551	0.538309	0.233694	0.326339	561.285	819.119	963.287	1210.08	1361.7	833.995
C06G3.6	WBGene00015552	1.52267	0.0174572	0.0419718	161.627	42.5148	158.705	367.779	393.09	282.551
C06G3.8	WBGene00015554	-2.46619	0.0236664	0.0540036	114.608	127.545	45.7956	19.9098	0	30.7306
C06G4.1	WBGene00015557	-2.2114	0.083911	0.150856	14.6933	68.0238	37.8998	7.18966	0	17.9262
C06G4.4	WBGene00015558	-6.2301	0.0347896	0.0741595	0	28.3432	13.4229	0	0	0
C06G4.6	WBGene00044446	-8.37134	4.53e-08	5.88e-07	240.971	73.6924	34.7415	0.553051	0	0
C06G8.3	WBGene00014669	-1.68418	0.0175471	0.0421413	56.8142	197.458	103.435	32.077	34.7483	44.3887
C06H2.2	WBGene00007386	-1.9363	0.0054374	0.0157668	171.422	577.257	198.974	104.527	45.6071	95.6064
C06H2.6	WBGene00007390	0.0414948	0.959496	0.971305	94.0374	213.519	83.6954	165.915	30.4047	204.017
C06H2.7	WBGene00007391	-1.71599	0.25153	0.346423	39.1822	8.50297	15.7916	3.31831	0	15.3653
C06H5.6	WBGene00007394	-1.25527	0.352908	0.456	8.816	88.8088	3.9479	9.95492	6.5153	25.6088
C06H5.8	WBGene00044795	1.22287	0.370238	0.473778	34.2845	0	34.7415	51.4337	19.5459	89.631
C07A12.18	WBGene00206364	-7.23923	0.00478474	0.0141081	27.4276	56.6865	0	0	0	0
C07A12.19	WBGene00219805	2.58794	0.518014	NA	0	0	0	2.76526	0	0
C07A12.2	WBGene00015560	0.59817	0.464622	0.567273	169.463	40.6253	56.8497	176.976	49.9506	174.994
C07A12.7	WBGene00015561	1.57443	0.00293724	0.00932592	657.282	283.432	349.784	881.01	1346.5	1615.92
C07A4.2	WBGene00007397	1.12623	0.284655	0.383849	26.448	56.6865	6.31664	100.655	78.1836	16.2189
C07A4.3	WBGene00007398	-9.14466	5.56e-10	1.16e-08	95.0169	64.2447	155.547	0	0	0
C07A9.12	WBGene00043994	0.644608	0.729235	0.798025	25.4685	22.6746	0	38.7136	0	35.8524
C07A9.13	WBGene00044227	-3.76146	0.33956	NA	0	7.5582	0	0	0	0
C07A9.14	WBGene00045124	1.05137	0.796119	NA	0	0	0	0.553051	0	0
C07A9.16	WBGene00200150	0.657389	0.870873	NA	0	0	0.789579	1.1061	0	0
C07A9.2	WBGene00007400	-0.733781	0.234779	0.327243	112.649	126.6	184.762	70.7905	52.1224	130.605
C07A9.9	WBGene00007405	0.626766	0.362452	0.465672	237.053	154.943	101.856	260.487	95.5578	403.766
C07B5.2	WBGene00007407	-4.85007	0.216195	0.307796	0	16.0612	0	0	0	0
C07B5.3	WBGene00007408	1.92394	0.0146978	0.0363577	137.138	17.0059	48.1643	305.837	238.894	221.943
C07B5.4	WBGene00007409	-1.19097	0.131514	0.214007	85.2214	62.3551	227.399	77.9802	60.8095	25.6088
C07B5.6	WBGene00007410	-2.21932	0.396246	0.500019	25.4685	12.2821	0	7.74272	0	0
C07B5.8	WBGene00195209	-1.20925	0.222262	0.314189	51.9165	47.2387	52.9018	13.2732	4.34353	46.9496
C07C7.1	WBGene00007411	2.38373	0.0620126	0.118714	59.7529	0	15.002	168.128	58.6377	162.189
C07C7.3	WBGene00235302	-4.09486	0.297684	NA	0	0	9.47495	0	0	0
C07D10.1	WBGene00015566	0.207192	0.896483	0.925979	24.4889	17.9507	5.52706	14.9324	41.2636	0
C07D10.5	WBGene00015569	1.70702	0.0203996	0.0477412	46.0391	13.2268	37.8998	73.0027	143.337	102.435
C07D10.6	WBGene00044673	1.61916	0.688888	NA	0	0	0	1.1061	0	0
C07D8.5	WBGene00015564	1.05137	0.796119	NA	0	0	0	0.553051	0	0
C07D8.6	WBGene00015565	-1.77075	0.000482023	0.00195688	549.531	936.271	863.01	271.548	277.986	139.995
C07E3.10	WBGene00007420	-2.80877	0.111829	0.18918	48.9778	110.539	29.2144	0	28.233	0
C07E3.3	WBGene00007414	-3.24662	8.52e-07	7.87e-06	401.618	294.77	360.838	55.3051	43.4353	12.8044
C07E3.4	WBGene00007415	-7.04767	3.4e-08	4.52e-07	68.5689	467.663	101.856	3.87136	0	0
C07E3.8	WBGene00007418	-1.72678	0.573376	0.667329	0	14.1716	3.15832	4.97746	0	0
C07E3.9	WBGene00007419	-3.30381	0.0270225	0.0600946	92.0782	97.3118	72.6413	25.4403	0	0
C07F11.2	WBGene00015570	2.43488	0.00553265	0.0159782	43.1005	19.8403	4.73748	81.2985	128.134	155.36
C07G1.12	WBGene00199304	4.17562	0.289419	NA	0	0	0	0.553051	8.68707	0
C07G1.15	WBGene00235296	-1.80726	0.641489	NA	0	0	7.10622	1.65915	0	0
C07G1.6	WBGene00015572	-5.38998	0.00188059	0.00636013	5.87733	58.576	28.4249	1.65915	0	0
C07G3.10	WBGene00015578	6.37454	0.0262611	0.0586712	0	0	0	20.4629	0	20.4871
C07G3.15	WBGene00269378	-1.12251	0.769597	NA	8.816	0	0	3.87136	0	0
C07G3.8	WBGene00015576	3.37306	0.395127	NA	0	0	0	4.97746	0	0
C07H4.1	WBGene00007421	-0.747902	0.281808	0.380697	36.2436	78.4163	56.0601	37.0544	34.7483	29.877
C07H6.15	WBGene00198566	1.05137	0.796119	NA	0	0	0	0.553051	0	0
C07H6.17	WBGene00199514	2.47043	0.537571	NA	0	0	0	0	0	2.56088
C07H6.4	WBGene00015581	-2.68028	8.5e-08	1.02e-06	1175.47	2399.73	1157.52	218.455	304.047	217.675
C07H6.9	WBGene00015582	-4.09486	0.297684	NA	0	0	9.47495	0	0	0
C08A9.10	WBGene00044773	-5.95583	6.62e-07	6.36e-06	82.2827	67.079	116.858	3.31831	0	0
C08A9.11	WBGene00045273	-8.76914	1.78e-08	2.55e-07	45.0596	58.576	138.966	0	0	0
C08A9.6	WBGene00015586	1.93865	0.155548	0.243021	0	17.0059	14.2124	26.5465	19.5459	73.412
C08A9.9	WBGene00015589	3.02254	0.447882	NA	0	0	0	3.87136	0	0
C08B11.8	WBGene00007435	-3.68349	0.00128091	0.00457668	32.3253	172.894	69.483	4.97746	0	15.3653
C08B11.9	WBGene00007436	-2.73577	0.00381801	0.011661	83.2622	222.022	68.6934	26.5465	2.17177	25.6088
C08B6.10	WBGene00007430	-2.14859	0.00461615	0.0137093	50.9369	135.103	111.331	33.1831	19.5459	13.6581
C08B6.11	WBGene00007431	-4.12687	0.0415134	0.0855409	0	40.6253	33.9519	2.2122	2.17177	0
C08B6.15	WBGene00077449	-5.51787	0.15884	0.246781	0	25.5089	0	0	0	0
C08B6.2	WBGene00007423	2.58794	0.518014	NA	0	0	0	2.76526	0	0
C08B6.3	WBGene00007424	-3.30386	0.00411078	0.0124192	38.2027	116.207	78.9579	3.87136	0	18.7798
C08B6.4	WBGene00007425	2.85727	7.45e-05	0.000388402	70.528	39.6805	55.2706	197.992	799.21	205.724
C08B6.5	WBGene00007426	5.64375	0.100017	0.173168	0	0	0	18.2507	6.5153	0
C08B6.6	WBGene00007427	-5.85249	0.0641843	0.12209	0	22.6746	9.47495	0	0	0
C08B6.8	WBGene00007429	-0.823714	0.347376	0.450516	57.7938	129.434	56.8497	54.199	73.8401	11.0972
C08D8.1	WBGene00015592	-0.491803	0.760597	0.822713	15.6729	13.2268	7.89579	9.40187	17.3741	0
C08D8.7	WBGene00235325	1.50311	0.255028	0.350506	91.0987	0	67.9038	215.69	41.2636	192.92
C08E3.1	WBGene00015593	5.50939	0.127988	0.209619	0	0	0	21.569	0	0.853628
C08E3.13	WBGene00015605	2.65248	0.0309017	0.0672308	0	11.3373	15.002	82.4046	34.7483	48.6568
C08E8.1	WBGene00007437	3.99426	0.311438	NA	0	0	0	7.74272	0	0
C08E8.10	WBGene00077692	-6.57094	5.74e-06	4.16e-05	63.6711	68.0238	27.6353	1.1061	0	0
C08E8.3	WBGene00007439	-7.56806	1.33e-05	8.76e-05	32.3253	22.6746	50.5331	0	0	0
C08E8.4	WBGene00007440	1.36137	0.0398909	0.08293	43.1005	75.582	78.9579	90.7004	277.986	142.556
C08E8.6	WBGene00007442	5.5691	0.155421	0.242872	0	0	0	0	23.8894	0
C08E8.9	WBGene00050891	5.31648	0.16563	0.254733	0	0	0	0.553051	19.5459	0
C08F1.10	WBGene00015613	2.03706	0.61266	NA	0	0	0	1.65915	0	0
C08F1.11	WBGene00044417	-2.51922	0.526913	NA	0	0	3.15832	0	0	0
C08F1.6	WBGene00015610	1.05137	0.796119	NA	0	0	0	0.553051	0	0
C08F1.8	WBGene00015611	5.20877	6.16e-09	1e-07	11.7547	0	8.68537	246.661	280.158	230.48
C08F11.1	WBGene00007450	-0.460318	0.828878	0.875501	0	12.2821	19.7395	10.508	13.0306	0
C08F11.10	WBGene00007457	-7.90121	9.07e-06	6.26e-05	10.7751	66.1342	56.0601	0	0	0
C08F11.11	WBGene00007458	-12.2822	1.77e-22	3.78e-20	1085.35	2164.48	2052.12	0.553051	0	0
C08F11.12	WBGene00007459	-4.95002	0.191026	0.282461	0	8.50297	8.68537	0	0	0
C08F11.13	WBGene00007460	-0.914709	0.179315	0.269579	123.424	343.898	378.209	120.012	84.6989	242.43
C08F11.14	WBGene00007461	-6.20735	0.0372003	0.0783741	14.6933	26.4537	0	0	0	0
C08F11.2	WBGene00007451	-3.39552	0.389718	NA	5.87733	0	0	0	0	0
C08F11.3	WBGene00007452	3.77689	0.33927	NA	0	0	0	6.63661	0	0
C08F11.7	WBGene00007454	-1.62646	0.67184	0.750238	10.7751	0	0	3.31831	0	0
C08F8.16	WBGene00219442	4.7002	0.168518	NA	0	0	0	0.553051	6.5153	5.9754
C08F8.2	WBGene00007444	-0.952573	0.20214	0.294084	122.444	73.6924	91.5912	32.63	93.386	25.6088
C08F8.3	WBGene00007445	-6.2704	5.74e-06	4.16e-05	63.6711	85.0297	30.004	1.65915	0	0
C08F8.6	WBGene00007448	-4.16322	9.13e-08	1.09e-06	207.666	499.786	173.707	5.53051	23.8894	21.3407
C08F8.9	WBGene00007449	-1.99505	0.00495627	0.0145435	141.056	205.961	295.303	77.9802	17.3741	63.1685
C08G5.1	WBGene00015614	2.03706	0.61266	NA	0	0	0	1.65915	0	0
C08G5.3	WBGene00015616	-4.11219	0.295606	NA	0	5.66865	3.9479	0	0	0
C08G5.6	WBGene00015618	1.32116	0.320161	0.422582	47.9982	0	16.5812	49.7746	67.3248	44.3887
C08G5.7	WBGene00044418	2.1559	0.000217254	0.000979397	449.616	157.777	163.443	1275.89	866.535	1289.83
C08G5.9	WBGene00201381	2.3444	0.558942	NA	0	0	0	2.2122	0	0
C08G9.1	WBGene00015619	2.09605	9.68e-07	8.81e-06	494.676	333.505	354.521	1890.88	1266.14	1895.91
C08G9.2	WBGene00015620	-1.34767	0.256967	0.352788	13.7138	12.2821	31.5832	9.40187	2.17177	10.2435
C08G9.7	WBGene00200031	1.61916	0.688888	NA	0	0	0	1.1061	0	0
C08H9.1	WBGene00007462	1.3834	0.072187	0.133921	12.7342	14.1716	20.5291	40.3727	45.6071	38.4133
C08H9.15	WBGene00007474	-2.82469	0.0175278	0.0421091	33.3049	90.6983	138.966	28.7587	0	6.82903
C08H9.16	WBGene00086566	-4.03052	4.66e-06	3.47e-05	64.6507	85.0297	91.5912	3.31831	10.8588	2.56088
C08H9.2	WBGene00007463	-3.75225	1.24e-17	1.35e-15	3746.8	4831.58	7155.96	424.19	412.636	331.208
C08H9.3	WBGene00007464	-4.84526	0.000289751	0.00125564	54.8551	198.403	163.443	13.2732	0	0
C08H9.8	WBGene00007468	1.05137	0.796119	NA	0	0	0	0.553051	0	0
C09B7.2	WBGene00015621	-1.06777	0.145245	0.230647	100.894	124.71	148.441	72.4497	17.3741	86.2165
C09B7.4	WBGene00022919	2.03706	0.61266	NA	0	0	0	1.65915	0	0
C09B8.11	WBGene00195664	4.69783	0.232069	NA	0	0	0	0	0	12.8044
C09B8.3	WBGene00015622	-6.29654	0.0326995	0.070425	34.2845	0	9.47495	0	0	0
C09B8.4	WBGene00015623	-2.78172	0.00430234	0.0128984	62.6916	30.2328	237.663	9.40187	28.233	11.9508
C09B8.5	WBGene00015624	3.37306	0.395127	NA	0	0	0	4.97746	0	0
C09B8.8	WBGene00015625	-1.41515	0.690614	0.765384	0	22.6746	0	8.29577	0	0
C09B9.1	WBGene00015626	1.36624	0.118158	0.19717	50.9369	11.3373	30.7936	129.967	34.7483	73.412
C09B9.2	WBGene00015627	-8.76097	1.08e-07	1.25e-06	18.6116	135.103	87.6433	0	0	0
C09B9.4	WBGene00015629	-3.1719	0.0587227	0.113592	21.5502	33.0671	22.1082	7.74272	0	0
C09B9.7	WBGene00015630	-6.35413	0.00289132	0.00920856	16.6524	12.2821	16.5812	0	0	0
C09B9.83	WBGene00200871	1.61916	0.688888	NA	0	0	0	1.1061	0	0
C09B9.85	WBGene00220250	-7.21934	0.00525087	0.0153042	21.5502	61.4103	0	0	0	0
C09D4.1	WBGene00015632	2.46031	7.13e-05	0.00037402	157.708	98.2565	182.393	782.014	1290.03	344.012
C09D4.2	WBGene00015633	-2.19776	0.00236384	0.00775685	177.3	182.341	134.229	56.4112	39.0918	11.9508
C09D4.3	WBGene00015634	-7.05694	2.77e-05	0.000165177	18.6116	99.2013	22.1082	0.553051	0	0
C09D4.4	WBGene00015635	-1.09513	0.14233	0.227205	109.71	46.2939	144.493	68.5783	26.0612	44.3887
C09D4.9	WBGene00206357	-4.93483	0.196196	0.287951	0	12.2821	4.73748	0	0	0
C09E7.10	WBGene00044295	3.23076	0.0503945	0.100156	47.9982	0	0	142.134	54.2942	252.674
C09E7.4	WBGene00015638	0.205697	0.793041	0.848323	37.2231	39.6805	23.6874	48.6685	19.5459	46.0959
C09E7.5	WBGene00015639	-4.08382	0.299012	NA	0	9.44774	0	0	0	0
C09E7.6	WBGene00015640	1.22396	0.267373	0.3647	4.89778	33.0671	4.73748	34.8422	30.4047	34.1451
C09E7.7	WBGene00015641	0.0838555	0.946248	0.962276	7.83645	70.8581	3.15832	27.0995	21.7177	37.5596
C09E7.8	WBGene00015642	-2.19317	0.223146	0.315194	36.2436	18.8955	16.5812	14.9324	0	0
C09E8.1	WBGene00015644	-0.40536	0.438528	0.542186	273.296	321.223	244.77	250.532	264.956	119.508
C09E9.1	WBGene00007476	1.92735	2.59e-05	0.000156054	109.71	127.545	88.4329	425.296	490.819	323.525
C09F12.2	WBGene00007482	-1.55414	0.317356	0.419486	27.4276	17.9507	7.89579	7.74272	10.8588	0
C09F12.3	WBGene00007483	0.88189	0.322671	0.425043	19.5911	14.1716	42.6373	34.8422	26.0612	79.3874
C09F5.1	WBGene00015647	-0.00720855	0.991734	0.994333	37.2231	127.545	76.5892	68.0253	104.245	69.1439
C09F5.3	WBGene00015649	3.78736	0.0196766	0.0463658	8.816	0	0	46.4563	23.8894	49.5104
C09F9.1	WBGene00007478	-6.83323	0.00414611	0.0125034	9.79556	52.9074	0.789579	0	0	0
C09F9.2	WBGene00007479	-7.37661	6.37e-07	6.15e-06	94.0374	283.432	37.8998	0	4.34353	0
C09F9.7	WBGene00045322	-3.24603	0.407585	NA	9.79556	0	0	0.553051	0	0
C09G1.2	WBGene00007484	8.88721	3.17e-08	4.26e-07	0	0	0	46.4563	152.024	38.4133
C09G1.3	WBGene00007485	6.03403	0.0557423	0.108967	0	0	0	11.061	21.7177	0
C09G1.4	WBGene00007486	3.04044	4.59e-07	4.59e-06	276.235	101.091	79.7475	1243.26	1042.45	1470.8
C09G1.5	WBGene00007487	-0.00104417	NA	NA	1239.14	99.2013	112.12	580.151	356.17	512.177
C09G4.4	WBGene00044001	-1.53902	0.0446969	0.0909079	52.896	68.0238	44.2165	14.9324	13.0306	28.1697
C09G5.13	WBGene00206538	2.39766	0.00297385	0.00942216	87.1805	12.2821	41.8477	272.654	345.311	127.191
C09G5.7	WBGene00007489	-3.28394	0.205057	0.296857	9.79556	31.1776	0	3.87136	0	0
C09G9.1	WBGene00007492	-0.189401	0.697658	0.771269	268.398	359.014	467.431	383.264	223.692	350.841
C09G9.3	WBGene00007494	-5.20405	0.168016	0.257199	19.5911	0.944774	0	0	0	0
C09G9.5	WBGene00007495	0.182136	0.901516	0.929148	20.5707	27.3985	7.10622	12.1671	0	49.5104
C09H10.10	WBGene00007504	-3.03201	0.0594295	0.11473	60.7325	44.4044	24.477	14.9324	0	0
C09H10.4	WBGene00043120	4.26566	0.278894	NA	0	0	0	1.1061	8.68707	0
C09H10.5	WBGene00007499	-0.147091	0.802635	0.856248	76.4054	170.059	130.281	108.398	84.6989	145.97
C09H10.9	WBGene00007503	-0.129026	0.934648	0.953959	17.632	35.9014	0	6.63661	23.8894	18.7798
C09H5.7	WBGene00015661	-6.96984	0.000557357	0.00221891	6.85689	41.5701	21.3186	0	0	0
C10A4.1	WBGene00015662	-3.96978	0.312966	NA	0	0	8.68537	0	0	0
C10A4.10	WBGene00050957	-2.8239	0.0216178	0.0501288	17.632	68.9685	86.0642	5.53051	0	17.9262
C10A4.2	WBGene00015663	-3.98219	0.311426	NA	8.816	0	0	0	0	0
C10A4.3	WBGene00015664	1.77097	0.0810944	0.146578	14.6933	2.83432	13.4229	24.8873	30.4047	50.3641
C10A4.4	WBGene00015665	-2.19947	0.122441	0.202718	16.6524	32.1223	38.6894	4.97746	15.2024	0
C10A4.6	WBGene00015667	-3.76929	0.209392	0.301409	6.85689	0	14.2124	1.1061	0	0
C10A4.7	WBGene00015668	-3.98219	0.311426	NA	8.816	0	0	0	0	0
C10A4.9	WBGene00045456	-8.75916	2.47e-09	4.39e-08	77.3849	78.4163	85.2746	0	0	0
C10B5.1	WBGene00015670	-2.08972	0.146155	0.231646	12.7342	42.5148	10.2645	4.42441	0	10.2435
C10B5.3	WBGene00015671	-1.02545	0.101504	0.175261	323.253	253.2	276.353	207.947	156.367	54.6322
C10C5.1	WBGene00007505	-0.641763	0.186986	0.277986	333.049	586.705	507.7	350.634	351.826	213.407
C10C5.2	WBGene00007506	-2.33136	0.193413	0.285222	29.3867	16.0612	55.2706	0	0	19.6335
C10C5.3	WBGene00007507	-6.55053	2.95e-09	5.18e-08	88.16	481.835	458.746	2.2122	10.8588	0
C10C5.4	WBGene00007508	-6.88245	6.2e-11	1.63e-09	185.136	276.819	424.794	6.08356	0	0
C10C5.5	WBGene00007509	-7.11262	0.00857146	0.02321	5.87733	0	71.0622	0	0	0
C10C5.7	WBGene00007511	2.01381	0.0198756	0.0467344	271.337	59.5208	28.4249	611.121	234.551	602.662
C10C6.3	WBGene00007512	-7.05234	0.000438447	0.00180447	5.87733	38.7358	29.2144	0	0	0
C10C6.7	WBGene00007515	2.1871	0.0463613	0.0935873	34.2845	21.7298	0.789579	116.141	60.8095	80.2411
C10C6.9	WBGene00045175	-2.84749	0.0192256	0.0455183	11.7547	76.5267	52.1122	6.63661	13.0306	0.853628
C10E2.1	WBGene00015672	2.39248	0.0847071	0.151866	6.85689	0	11.0541	13.2732	52.1224	29.877
C10E2.2	WBGene00015673	3.81282	0.000931091	0.00346135	10.7751	9.44774	0	71.3436	158.539	52.925
C10E2.4	WBGene00015674	3.85744	0.000310281	0.00133406	22.5298	0	11.0541	153.748	119.447	212.553
C10E2.5	WBGene00015675	3.28693	0.00339519	0.010544	17.632	0	10.2645	111.716	69.4966	90.4846
C10F3.7	WBGene00015679	6.59392	0.00287216	0.00915996	0	0	0	6.63661	32.5765	9.38991
C10G11.1	WBGene00015685	-4.09486	0.297684	NA	0	0	9.47495	0	0	0
C10G11.10	WBGene00015690	5.5691	0.155421	0.242872	0	0	0	0	23.8894	0
C10G11.6	WBGene00015686	0.697769	0.414339	0.517784	22.5298	32.1223	64.7455	54.7521	26.0612	111.825
C10G11.7	WBGene00015687	-0.174143	0.774902	0.834073	7332.95	1911.28	2928.55	2794.57	4675.81	3319.76
C10G11.8	WBGene00015688	-7.9102	9.96e-15	6.23e-13	149.872	359.959	324.517	1.65915	2.17177	0
C10G11.9	WBGene00015689	-9.13023	1.58e-09	2.94e-08	63.6711	179.507	68.6934	0	0	0
C10G8.3	WBGene00015682	-4.43035	0.00404017	0.0122508	14.6933	49.1283	48.1643	4.42441	0	0
C10G8.4	WBGene00015683	-6.58448	1.87e-08	2.67e-07	91.0987	106.76	94.7495	2.2122	0	0
C10G8.8	WBGene00015684	-3.59549	4.98e-07	4.93e-06	653.364	821.954	1095.15	76.321	121.619	17.0726
C10H11.7	WBGene00015696	-7.62251	2.72e-05	0.000162883	11.7547	62.3551	35.5311	0	0	0
C10H11.8	WBGene00015697	0.99651	0.182103	0.272626	57.7938	23.6194	46.5852	103.421	39.0918	110.972
C11D2.3	WBGene00015701	-0.527248	0.718712	0.789292	18.6116	16.0612	7.10622	11.061	0	17.0726
C11D2.4	WBGene00015702	-0.769419	0.246519	0.340633	96.976	99.2013	149.231	54.199	112.932	38.4133
C11D2.7	WBGene00015703	-1.3127	0.010362	0.0272216	306.601	221.077	285.828	118.906	69.4966	136.581
C11E4.6	WBGene00007520	2.6675	1.13e-05	7.56e-05	128.322	33.0671	96.3287	555.263	603.751	478.885
C11E4.7	WBGene00007521	-5.53828	0.000847442	0.00319149	11.7547	20.785	71.0622	1.65915	0	0
C11E4.8	WBGene00007522	3.50362	0.0953779	0.167	17.632	0	0	83.5107	0	115.24
C11G10.1	WBGene00007525	-4.16554	0.00641999	0.0181521	20.5707	160.612	54.481	12.1671	0	0
C11G10.10	WBGene00199680	1.05137	0.796119	NA	0	0	0	0.553051	0	0
C11G10.12	WBGene00199960	-5.12318	0.16052	0.248756	0	12.2821	7.10622	0	0	0
C11G10.5	WBGene00196462	1.05137	0.796119	NA	0	0	0	0.553051	0	0
C11G10.8	WBGene00198997	1.05137	0.796119	NA	0	0	0	0.553051	0	0
C11H1.2	WBGene00007528	-0.626388	0.571868	0.666234	27.4276	58.576	20.5291	30.4178	2.17177	34.9988
C11H1.3	WBGene00007529	-1.38369	0.0451169	0.0915698	121.465	233.359	123.964	59.7295	97.7295	28.1697
C11H1.5	WBGene00007530	-5.22127	0.000935261	0.00347528	15.6729	87.864	23.6874	2.76526	0	0
C11H1.7	WBGene00007531	0.955896	0.323928	0.426085	72.4871	17.9507	7.89579	52.5399	52.1224	85.3628
C11H1.9	WBGene00023500	-2.45323	0.000745181	0.00284216	103.833	160.612	162.653	16.5915	49.9506	14.5117
C12D12.1	WBGene00015713	-3.31622	8.99e-05	0.000455091	84.2418	1130.89	544.81	57.5173	43.4353	75.1193
C12D12.3	WBGene00015714	-3.26362	0.173151	0.263125	0	29.288	27.6353	5.53051	0	0
C12D5.10	WBGene00015711	6.6576	0.0214305	0.0497715	0	0	0	7.18966	43.4353	0
C12D5.3	WBGene00015706	0.847181	0.424569	0.528583	48.9778	21.7298	3.9479	57.5173	21.7177	53.7786
C12D5.4	WBGene00015707	5.77352	0.0735068	0.135925	0	0	0	11.6141	0	15.3653
C12D5.5	WBGene00015708	3.68449	0.0892669	0.158408	8.816	0	0	49.7746	0	62.3149
C12D5.9	WBGene00015710	-0.670895	0.677656	0.755117	21.5502	17.9507	5.52706	9.40187	19.5459	0
C12D8.1	WBGene00007534	1.55734	0.000364337	0.00153597	867.886	438.375	626.926	1822.3	1863.38	2003.47
C12D8.13	WBGene00007540	2.58794	0.518014	NA	0	0	0	2.76526	0	0
C12D8.15	WBGene00007542	-0.733952	0.764602	0.825959	63.6711	0	0	16.5915	0	21.3407
C12D8.2	WBGene00014674	2.80872	0.481926	NA	0	0	0	3.31831	0	0
C12D8.21	WBGene00195157	6.66755	0.00135743	0.00480622	0	0	0	21.569	15.2024	13.6581
C12D8.24	WBGene00201264	5.27568	0.178701	0.268876	0	0	0	0	19.5459	0
C12D8.9	WBGene00007538	5.31648	0.16563	0.254733	0	0	0	0.553051	19.5459	0
C13A10.1	WBGene00015728	-0.672959	0.731973	0.800329	0	36.8462	11.8437	13.8263	0	16.2189
C13A10.2	WBGene00015729	1.38658	0.0823515	0.148422	919.803	188.01	114.489	707.905	1214.02	1273.61
C13A10.5	WBGene00200432	-3.13148	0.42859	NA	4.89778	0	0	0	0	0
C13A2.12	WBGene00044547	6.71148	0.0172615	0.041568	0	0	0	15.4854	36.92	0
C13A2.3	WBGene00015720	1.56213	0.459038	0.561718	2.93867	16.0612	0	21.569	34.7483	0
C13B4.1	WBGene00007545	-2.45179	0.00152312	0.00528594	96.976	603.711	312.673	84.6168	67.3248	33.2915
C13B9.2	WBGene00015733	0.0535939	0.979509	0.98544	14.6933	0	24.477	6.63661	34.7483	0
C13C12.2	WBGene00007552	-4.50126	0.00266959	0.00860567	20.5707	142.661	45.7956	8.29577	0	0
C13C4.4	WBGene00007548	1.72637	0.00235312	0.00773248	34.2845	79.361	58.4289	180.295	169.398	219.382
C13C4.6	WBGene00007550	-1.2973	0.475618	0.577837	8.816	8.50297	4.73748	6.63661	0	1.70726
C13C4.7	WBGene00007551	0.101919	0.943777	0.960535	17.632	28.3432	22.8978	41.4788	32.5765	0
C13E3.1	WBGene00015740	2.54215	9.61e-06	6.58e-05	24.4889	23.6194	44.2165	157.067	175.913	206.578
C13F10.1	WBGene00015741	-0.510459	0.562043	0.657629	56.8142	18.8955	31.5832	31.5239	30.4047	13.6581
C13F10.2	WBGene00015742	0.924815	0.0814784	0.147146	70.528	74.6372	101.066	129.414	134.65	203.164
C13F10.5	WBGene00015744	-0.36246	0.598933	0.689175	119.506	299.493	75.0101	129.967	158.539	96.46
C13F10.6	WBGene00015745	-0.00737238	0.989404	0.992481	71.5076	83.1401	128.701	84.6168	99.9013	98.1673
C13F10.7	WBGene00015746	-3.16937	2.97e-08	4.03e-07	935.476	2122.91	1050.14	139.369	93.386	221.943
C13G3.1	WBGene00007553	2.1145	0.0122265	0.031221	289.949	48.1835	42.6373	752.703	277.986	615.466
C13G3.5	WBGene00196603	1.61916	0.688888	NA	0	0	0	1.1061	0	0
C13G5.2	WBGene00015747	-0.188468	0.865036	0.903368	64.6507	61.4103	67.9038	38.7136	2.17177	128.044
C14A11.11	WBGene00198449	2.06969	0.603237	NA	0.979556	0	0	0.553051	0	3.41451
C14A11.2	WBGene00015748	3.96561	2.76e-07	2.91e-06	39.1822	10.3925	6.31664	245.002	275.814	347.427
C14A11.5	WBGene00015750	2.78867	0.0954874	0.167156	48.9778	0	0	91.2534	180.257	66.583
C14A11.6	WBGene00015751	0.915335	0.294705	0.395134	37.2231	67.079	8.68537	81.8516	58.6377	71.7048
C14A11.9	WBGene00050944	1.08499	0.0479938	0.096339	118.526	114.318	66.3247	231.728	143.337	256.942
C14A4.12	WBGene00007562	0.815494	0.231172	0.323737	43.1005	124.71	53.6914	175.317	89.0425	123.776
C14A4.13	WBGene00007563	0.637191	0.78626	0.842769	7.83645	7.5582	0	2.76526	21.7177	0
C14A4.3	WBGene00007556	-0.798414	0.225566	0.317332	178.279	359.014	282.669	183.06	58.6377	227.065
C14A4.6	WBGene00007557	-1.77201	0.274598	0.372769	0	90.6983	39.479	4.42441	4.34353	29.0234
C14A4.7	WBGene00007558	-0.598178	0.542315	0.640054	10.7751	31.1776	68.6934	16.0385	36.92	21.3407
C14A4.8	WBGene00007559	-5.18455	0.157793	0.24563	0	2.83432	17.3707	0	0	0
C14A4.9	WBGene00007560	-5.0752	0.000759238	0.00289175	13.7138	205.961	40.2686	0.553051	8.68707	0
C14A6.13	WBGene00050956	-7.60893	2.22e-05	0.000136356	13.7138	58.576	36.3207	0	0	0
C14A6.16	WBGene00206536	-2.75937	0.487039	NA	0	3.7791	0	0	0	0
C14A6.6	WBGene00007570	-6.36687	0.0266727	0.0594373	0	19.8403	26.0561	0	0	0
C14B1.12	WBGene00184990	-5.26042	0.000128321	0.000623968	28.4071	67.079	63.1664	3.31831	0	0
C14B1.2	WBGene00007573	-6.85385	6.23e-09	1.01e-07	75.4258	334.45	159.495	3.87136	0	0
C14B1.3	WBGene00007574	-0.510334	0.432721	0.536361	87.1805	177.618	109.752	128.308	47.7789	84.5092
C14B1.7	WBGene00007578	-3.69905	0.0124102	0.0316264	49.9573	57.6312	41.8477	10.508	0	0
C14B1.8	WBGene00007579	-0.857141	0.20827	0.300327	65.6302	98.2565	77.3788	51.4337	21.7177	58.0467
C14B1.9	WBGene00007580	-9.20607	9.66e-11	2.46e-09	61.712	293.825	269.247	0.553051	0	0
C14B4.2	WBGene00007583	2.00036	0.000268928	0.00117625	160.647	93.5327	74.2205	399.856	595.064	320.111
C14B9.10	WBGene00015755	-1.91029	0.00250309	0.00814073	1442.89	1779.01	3028.04	786.992	199.803	672.659
C14B9.11	WBGene00195744	-5.08469	0.194535	0.286107	0	18.8955	0	0	0	0
C14B9.13	WBGene00197895	-2.34299	0.557171	NA	0	2.83432	0	0	0	0
C14B9.2	WBGene00015752	-2.6749	6.56e-09	1.06e-07	347.742	489.393	354.521	54.199	69.4966	64.0221
C14B9.3	WBGene00015753	-4.62006	2.02e-05	0.000125568	56.8142	109.594	121.595	7.18966	4.34353	0
C14B9.8	WBGene00015754	1.33024	0.00340147	0.0105594	188.075	120.931	172.918	370.544	486.476	356.817
C14C10.1	WBGene00007584	-3.01584	0.000184476	0.000852184	43.1005	187.065	96.3287	11.061	15.2024	14.5117
C14C10.2	WBGene00007585	-0.494575	0.737514	0.805104	17.632	37.791	60.7976	14.3793	69.4966	0
C14C10.4	WBGene00007587	0.146372	0.783717	0.84081	114.608	203.126	249.507	251.085	167.226	208.285
C14C10.5	WBGene00007588	-0.052977	0.900386	0.928436	380.068	297.604	420.846	409.258	304.047	344.012
C14C10.9	WBGene00195234	-3.09966	0.433423	NA	0	0	4.73748	0	0	0
C14C11.1	WBGene00015765	-6.3658	0.00314274	0.00987546	9.79556	22.6746	13.4229	0	0	0
C14C11.2	WBGene00015766	-5.99448	0.000139849	0.000671878	23.5093	56.6865	25.2665	1.1061	0	0
C14C11.4	WBGene00015768	-0.261435	0.900586	0.928491	0	14.1716	12.6333	6.63661	0	15.3653
C14C11.7	WBGene00015769	-2.56759	0.000727659	0.00278113	57.7938	119.986	81.3267	12.1671	23.8894	9.38991
C14C6.12	WBGene00015763	-2.80807	0.479154	NA	3.91822	0	0	0	0	0
C14C6.13	WBGene00015764	1.52923	0.629715	0.715585	6.85689	0	0	0.553051	19.5459	0
C14C6.2	WBGene00015756	-1.13009	0.201747	0.293642	30.3662	215.409	65.5351	57.5173	58.6377	26.4625
C14C6.5	WBGene00015759	-1.1105	0.16184	0.250308	108.731	718.973	324.517	165.362	82.5272	284.258
C14C6.6	WBGene00015760	-4.81379	0.219694	0.311657	15.6729	0	0	0	0	0
C14E2.1	WBGene00015770	6.01602	0.0502861	0.0999766	0	0	0	18.2507	0	13.6581
C14E2.12	WBGene00219816	-4.82986	0.000216424	0.000976193	26.448	35.9014	153.178	2.2122	6.5153	0
C14E2.3	WBGene00015772	5.6327	0.113498	0.191099	0	0	0	1.1061	23.8894	0
C14E2.4	WBGene00015773	2.80872	0.481926	NA	0	0	0	3.31831	0	0
C14E2.5	WBGene00015774	5.51476	0.106817	0.182382	0	0	0	7.18966	0	15.3653
C14E2.6	WBGene00015775	2.55348	0.334932	0.438247	7.83645	0	0	4.97746	41.2636	0
C14E2.7	WBGene00044562	2.12268	0.0157541	0.0385262	5.87733	16.0612	16.5812	87.3821	32.5765	46.9496
C14F11.2	WBGene00015779	1.06171	0.0518928	0.10265	423.168	185.176	281.88	862.76	414.808	577.906
C14F11.4	WBGene00015780	-8.77157	4.9e-20	7.54e-18	577.938	321.223	548.758	1.65915	0	0.853628
C14F11.6	WBGene00015781	-6.35709	7.33e-12	2.34e-10	237.053	364.683	147.651	4.97746	4.34353	0
C14F11.7	WBGene00015782	6.99753	0.00094601	0.00351204	0	0	0	8.84882	47.7789	7.68265
C14F11.t1	WBGene00022925	1.05137	0.796119	NA	0	0	0	0.553051	0	0
C14H10.1	WBGene00007591	-3.68547	4.14e-07	4.2e-06	382.027	1398.27	684.565	98.9961	21.7177	68.2903
C14H10.2	WBGene00007592	-0.433966	0.519129	0.618817	69.5485	133.213	115.279	112.269	84.6989	38.4133
C14H10.3	WBGene00007593	0.749269	0.056449	0.110048	413.373	330.671	332.413	544.755	679.763	586.443
C15A11.2	WBGene00007597	-5.53549	5.15e-05	0.000282992	68.5689	273.04	40.2686	7.18966	0	0
C15A11.4	WBGene00007598	-1.37414	0.397719	0.501483	12.7342	39.6805	7.89579	0	10.8588	12.8044
C15A11.7	WBGene00007599	-0.69522	0.463868	0.566611	29.3867	127.545	204.501	119.459	86.8707	17.0726
C15A7.2	WBGene00007595	3.33623	0.0415083	0.0855409	23.5093	0	0	137.71	52.1224	46.0959
C15B12.1	WBGene00015783	-1.85108	0.24228	0.335763	10.7751	18.8955	28.4249	1.1061	0	14.5117
C15B12.14	WBGene00200444	1.61916	0.688888	NA	0	0	0	1.1061	0	0
C15B12.2	WBGene00015784	4.18362	0.00666064	0.0187423	0	0	6.31664	53.646	32.5765	31.5842
C15B12.3	WBGene00015785	-4.51378	0.250222	NA	12.7342	0	0	0	0	0
C15B12.4	WBGene00015786	1.34197	0.178066	0.268338	2.93867	37.791	26.0561	66.9192	60.8095	41.8278
C15B12.6	WBGene00015787	1.70939	0.0120415	0.0308396	30.3662	14.1716	25.2665	68.5783	71.6683	87.9237
C15B12.8	WBGene00015788	3.13725	0.0539456	0.106085	0	0	16.5812	43.691	58.6377	45.2423
C15B12.9	WBGene00044573	5.32819	0.141059	0.225766	0	0	0	2.76526	0	17.0726
C15C6.1	WBGene00007600	-6.72449	4.2e-11	1.14e-09	158.688	411.922	122.385	4.42441	0	0.853628
C15C6.2	WBGene00007601	-10.4569	1.78e-13	8.35e-12	112.649	393.026	276.353	0	0	0
C15C6.3	WBGene00007602	-0.0428923	0.929515	0.949958	924.701	1544.71	683.776	884.329	966.436	1209.59
C15C6.4	WBGene00007603	-1.12966	0.135674	0.219087	72.4871	80.3058	72.6413	49.2215	41.2636	12.8044
C15C7.4	WBGene00015790	3.01352	0.000133645	0.000647177	334.029	68.0238	54.481	1729.94	655.874	1296.66
C15C7.5	WBGene00015791	-1.51824	0.00103883	0.00380935	671.975	1083.66	736.678	235.6	382.231	255.235
C15C7.6	WBGene00015792	-1.73382	0.420125	0.523738	9.79556	24.5641	2.36874	10.508	0	0
C15C7.7	WBGene00015793	0.85975	0.194858	0.286505	33.3049	125.655	86.0642	127.202	171.57	146.824
C15C8.4	WBGene00007606	-0.956027	0.424959	0.528907	34.2845	72.7476	82.9058	43.691	0	52.925
C15C8.5	WBGene00007607	1.69648	0.125139	0.206025	88.16	31.1776	1.57916	105.633	197.631	88.7773
C15C8.6	WBGene00007608	-1.98178	0.141804	0.226605	10.7751	37.791	20.5291	8.84882	0	7.68265
C15C8.7	WBGene00007609	-1.48349	0.22459	0.316527	42.1209	199.347	183.972	53.646	0	97.3136
C15C8.8	WBGene00045460	-3.9413	0.313478	0.415562	0	0	15.7916	0.553051	0	0
C15F1.1	WBGene00015794	-4.78129	0.000918901	0.00342221	81.3031	543.245	320.569	33.1831	0	0
C15F1.2	WBGene00015795	-4.04236	0.00739086	0.0205191	71.5076	318.389	3.15832	2.76526	0	20.4871
C15F1.5	WBGene00015796	-0.800188	0.642499	0.725502	4.89778	22.6746	17.3707	0	21.7177	5.12177
C15F1.8	WBGene00015797	-5.79769	0.00134585	0.00477139	16.6524	22.6746	18.9499	0.553051	0	0
C15H11.1	WBGene00007613	-4.39903	0.0199088	0.0467923	0.979556	83.1401	33.1623	4.97746	0	0
C15H11.10	WBGene00007618	3.37306	0.395127	NA	0	0	0	4.97746	0	0
C15H11.11	WBGene00007619	-2.32661	0.199834	0.291813	12.7342	34.9567	19.7395	12.7202	0	0
C15H11.13	WBGene00077576	-5.66994	0.147571	0.233377	0	28.3432	0	0	0	0
C15H7.2	WBGene00014678	-4.85007	0.216195	0.307796	0	16.0612	0	0	0	0
C15H7.3	WBGene00007610	-10.4971	1.04e-13	5.12e-12	181.218	457.271	165.812	0	0	0
C15H7.4	WBGene00007611	-5.54524	0.00349585	0.0108258	4.89778	58.576	11.8437	1.1061	0	0
C15H9.11	WBGene00015805	-2.60638	0.0360878	0.0764414	116.567	102.98	76.5892	37.0544	10.8588	0
C15H9.2	WBGene00015798	1.80177	0.175453	0.265715	19.5911	0	12.6333	45.3502	23.8894	42.6814
C15H9.3	WBGene00015799	4.48589	0.00261735	0.00846546	9.79556	0	0	110.61	71.6683	34.1451
C15H9.4	WBGene00015800	0.408133	0.353589	0.456629	125.383	136.992	129.491	171.999	169.398	178.408
C15H9.5	WBGene00015801	-0.516905	0.633868	0.718419	81.3031	173.838	134.229	93.4656	2.17177	174.994
C15H9.9	WBGene00015803	-0.00309777	0.995139	0.996635	1054	1197.97	2217.93	1474.43	1939.39	1049.11
C16A11.10	WBGene00185089	-4.44238	0.0183008	0.0436618	22.5298	17.9507	7.10622	1.65915	0	0
C16A11.2	WBGene00015815	0.420913	0.485889	0.587582	56.8142	62.3551	99.487	116.141	110.76	66.583
C16A11.3	WBGene00015816	-2.4917	0.0114606	0.0296007	18.6116	81.2506	45.7956	8.84882	4.34353	11.9508
C16A11.4	WBGene00015817	-1.80384	0.154938	0.242399	72.4871	149.274	142.124	33.7361	71.6683	0
C16A11.5	WBGene00015818	-1.02435	0.627443	0.713546	41.1413	24.5641	3.15832	0	34.7483	0
C16A11.7	WBGene00015820	-2.82389	0.00906069	0.0243464	33.3049	101.091	72.6413	14.9324	0	12.8044
C16A3.1	WBGene00015806	0.493355	0.613383	0.702119	32.3253	7.5582	34.7415	42.5849	47.7789	15.3653
C16A3.10	WBGene00015814	-1.41321	0.00856333	0.0231956	704.301	949.498	677.459	382.158	349.655	144.263
C16A3.15	WBGene00200702	1.61916	0.688888	NA	0	0	0	1.1061	0	0
C16A3.2	WBGene00015807	1.59664	0.0383604	0.0803396	49.9573	34.0119	15.002	74.6619	65.153	157.921
C16A3.4	WBGene00015809	0.582234	0.277567	0.376018	355.579	290.991	308.726	443.547	729.714	260.357
C16A3.5	WBGene00015810	-1.4589	0.00401433	0.0121815	1299.87	2533.88	2657.72	668.086	1098.91	597.54
C16A3.6	WBGene00015811	-0.185048	0.736893	0.804822	595.57	727.476	715.359	523.186	966.436	307.306
C16B8.2	WBGene00015822	0.876016	0.209155	0.301279	45.0596	28.3432	51.3227	61.9417	49.9506	116.093
C16B8.3	WBGene00015823	-2.82454	2.51e-05	0.000151747	431.005	1286.78	1253.85	138.816	60.8095	217.675
C16B8.4	WBGene00015824	2.04292	0.000295275	0.00127722	125.383	83.1401	48.9539	365.014	262.784	430.229
C16B8.t3	WBGene00022929	-4.76535	0.224432	0.316527	8.816	0	6.31664	0	0	0
C16C10.1	WBGene00007622	-2.01416	0.00474266	0.0140091	72.4871	94.4774	75.0101	11.6141	19.5459	29.0234
C16C10.2	WBGene00007623	-1.74183	0.00175244	0.00597712	146.933	256.979	135.808	50.3276	58.6377	52.925
C16C10.4	WBGene00007625	-0.888155	0.107514	0.183294	231.175	113.373	163.443	78.5333	84.6989	110.972
C16C10.8	WBGene00007628	0.204602	0.678423	0.75559	196.891	267.371	140.545	242.236	260.612	194.627
C16C10.9	WBGene00007629	1.74726	0.475149	0.577523	16.6524	0	0	22.122	0	33.2915
C16C2.4	WBGene00007621	-1.29708	0.0286535	0.0631922	724.871	1254.66	812.477	270.995	655.874	213.407
C16C4.18	WBGene00194998	-1.20792	0.756702	NA	0	4.72387	0	1.65915	0	0
C16C8.11	WBGene00015849	-1.09983	0.341454	0.444726	21.5502	16.0612	18.9499	2.2122	13.0306	11.9508
C16C8.12	WBGene00015850	-6.66119	0.00175912	0.00599866	4.89778	29.288	22.1082	0	0	0
C16C8.13	WBGene00015851	-1.72414	0.271279	0.369171	25.4685	13.2268	23.6874	2.76526	17.3741	0
C16C8.14	WBGene00015852	-0.821778	0.830493	NA	0	0	7.10622	3.87136	0	0
C16C8.16	WBGene00015853	-2.65229	0.0373689	0.0786537	49.9573	45.3492	23.6874	2.76526	0	15.3653
C16C8.18	WBGene00015855	-1.89368	0.120917	0.200795	27.4276	121.876	66.3247	1.1061	47.7789	11.0972
C16C8.19	WBGene00015856	1.05137	0.796119	NA	0	0	0	0.553051	0	0
C16C8.20	WBGene00195070	-0.798918	0.844774	NA	0.979556	0	0	0	0	0
C16C8.22	WBGene00195072	-6.07083	0.0446026	0.0907947	0	16.0612	21.3186	0	0	0
C16C8.4	WBGene00015842	-4.43983	0.00133109	0.00472823	18.6116	32.1223	30.004	2.2122	0	0.853628
C16C8.5	WBGene00015843	-2.88552	0.0959708	0.167842	14.6933	3.7791	26.8457	3.87136	2.17177	0
C16C8.7	WBGene00015845	-0.798918	0.844774	NA	0.979556	0	0	0	0	0
C16C8.9	WBGene00015847	-5.08469	0.194535	0.286107	0	18.8955	0	0	0	0
C16D2.1	WBGene00007633	-7.34874	0.000368953	0.00155185	9.79556	74.6372	6.31664	0	0	0
C16D2.2	WBGene00195143	0.368768	0.70041	0.773167	162.606	30.2328	53.6914	144.899	19.5459	151.946
C16D6.1	WBGene00007634	7.67805	0.00190913	0.00644474	0	0	0	34.8422	67.3248	0
C16D9.1	WBGene00015857	1.44294	0.313728	0.41578	10.7751	0	33.9519	75.768	21.7177	23.9016
C16D9.10	WBGene00022932	4.11777	0.296325	NA	0	0	0	0	0	8.53628
C16D9.3	WBGene00015858	2.03706	0.61266	NA	0	0	0	1.65915	0	0
C16D9.4	WBGene00015859	-3.08326	0.0432044	0.0884081	2.93867	89.7536	46.5852	2.2122	0	13.6581
C16D9.5	WBGene00015860	1.68555	0.218462	0.310257	43.1005	0	11.8437	23.2281	71.6683	81.9483
C16D9.6	WBGene00015861	3.35072	6.94e-07	6.61e-06	34.2845	8.50297	18.1603	230.622	210.661	179.262
C16D9.9	WBGene00015864	2.21774	0.00888125	0.0239346	75.4258	10.3925	24.477	188.037	93.386	229.626
C16E9.1	WBGene00015865	-2.39802	0.0962266	0.168182	0	207.85	218.714	49.7746	10.8588	19.6335
C16E9.2	WBGene00015866	2.8527	0.000323862	0.00138521	212.564	23.6194	54.481	575.173	649.358	873.262
C16E9.20	WBGene00199880	4.23279	0.251326	NA	0	0	0	1.65915	4.34353	3.41451
C16E9.27	WBGene00201729	3.23221	0.415857	NA	0	0	0	0.553051	4.34353	0
C16E9.28	WBGene00202267	-2.75937	0.487039	NA	0	3.7791	0	0	0	0
C16E9.29	WBGene00202429	1.05137	0.796119	NA	0	0	0	0.553051	0	0
C16H3.3	WBGene00015868	2.50163	1.06e-07	1.24e-06	252.725	290.991	159.495	980.007	1652.71	1350.44
C17B7.10	WBGene00015884	-4.08382	0.299012	NA	0	9.44774	0	0	0	0
C17B7.12	WBGene00015886	-3.72191	0.181406	0.271829	15.6729	0	11.8437	1.65915	0	0
C17B7.15	WBGene00268213	-6.49982	0.0244376	0.0553716	8.816	41.5701	0	0	0	0
C17B7.2	WBGene00015876	-4.51378	0.250222	NA	12.7342	0	0	0	0	0
C17B7.4	WBGene00015878	-4.90137	0.211315	0.303565	16.6524	0	0	0	0	0
C17B7.5	WBGene00015879	-6.38412	0.0314985	0.0683593	5.87733	40.6253	0	0	0	0
C17C3.1	WBGene00015887	-2.8945	3.07e-05	0.000180813	148.892	188.955	397.158	18.2507	30.4047	50.3641
C17C3.11	WBGene00015893	-0.798918	0.844774	NA	0	0	0.789579	0	0	0
C17C3.3	WBGene00015889	3.52065	0.374091	NA	0	0	0	5.53051	0	0
C17C3.6	WBGene00015891	-3.09368	0.430269	NA	8.816	0	0	0.553051	0	0
C17C3.9	WBGene00015892	-5.36309	0.0602507	0.115934	0.979556	13.2268	8.68537	0	0	0
C17D12.5	WBGene00007639	-6.21947	0.0350629	0.0745972	0	26.4537	15.002	0	0	0
C17D12.7	WBGene00007640	-1.92744	0.00915167	0.0245627	111.669	79.361	142.914	23.7812	13.0306	49.5104
C17D12.8	WBGene00045375	2.52237	0.398755	0.502491	3.91822	0	0	1.65915	0	20.4871
C17E4.1	WBGene00007641	-5.99258	0.00155355	0.00537112	9.79556	44.4044	18.1603	0	2.17177	0
C17E4.10	WBGene00007647	2.04397	6.1e-07	5.91e-06	566.183	610.324	401.106	1780.27	2488.85	2237.36
C17E4.11	WBGene00044236	-2.80708	0.0919553	0.162355	29.3867	22.6746	54.481	14.3793	0	0
C17E4.14	WBGene00195884	1.61916	0.688888	NA	0	0	0	1.1061	0	0
C17E4.19	WBGene00219310	-4.51378	0.250222	NA	12.7342	0	0	0	0	0
C17E4.20	WBGene00219313	3.1953	9.01e-08	1.08e-06	24.4889	13.2268	18.9499	128.308	188.944	202.31
C17E4.4	WBGene00007644	-5.6078	0.000389995	0.00162952	19.5911	68.9685	21.3186	1.65915	0	0
C17E4.6	WBGene00007645	0.964461	0.0487908	0.0976104	376.149	464.829	317.411	875.48	447.384	933.869
C17E7.12	WBGene00015905	-3.65073	0.0699251	0.130682	18.6116	3.7791	18.1603	2.76526	0	0
C17E7.13	WBGene00015906	-1.80112	0.654845	NA	1.95911	0	0	0	0	0
C17E7.4	WBGene00015899	-5.14127	0.0544988	0.10702	0	25.5089	11.0541	0.553051	0	0
C17E7.9	WBGene00015903	-6.24258	6.29e-05	0.000335681	21.5502	74.6372	29.2144	1.1061	0	0
C17F3.1	WBGene00015907	-9.75673	2.21e-09	4.01e-08	18.6116	230.525	232.136	0	0	0
C17F3.3	WBGene00015908	-5.72956	1.11e-06	9.86e-06	260.562	879.585	262.14	2.76526	26.0612	0
C17F4.11	WBGene00044373	2.58794	0.518014	NA	0	0	0	2.76526	0	0
C17F4.12	WBGene00044374	-6.83669	0.0160657	0.0391352	0	60.4656	3.15832	0	0	0
C17F4.2	WBGene00015910	-7.77112	4.61e-05	0.000257018	6.85689	87.864	26.8457	0	0	0
C17F4.3	WBGene00015911	-5.90849	0.0603224	0.116045	10.7751	22.6746	0	0	0	0
C17F4.7	WBGene00015913	-7.00663	4.72e-22	9.24e-20	6108.51	40858.7	30322.2	251.638	243.238	106.704
C17F4.8	WBGene00015914	2.37038	0.102438	0.176654	10.7751	0	7.10622	62.4948	13.0306	16.2189
C17G1.1	WBGene00007648	-4.68786	0.232162	0.32477	8.816	0	5.52706	0	0	0
C17G1.13	WBGene00200358	2.3444	0.558942	NA	0	0	0	2.2122	0	0
C17G1.2	WBGene00007649	-8.597	8.67e-10	1.73e-08	65.6302	138.882	205.291	0.553051	0	0
C17G1.5	WBGene00007652	-4.42739	0.00103556	0.00379989	112.649	105.815	56.8497	11.6141	0	0
C17G1.9	WBGene00197154	1.05137	0.796119	NA	0	0	0	0.553051	0	0
C17G10.1	WBGene00015915	-2.09251	0.00200848	0.00671536	68.5689	151.164	90.8016	21.0159	32.5765	20.4871
C17G10.13	WBGene00270322	0.674875	0.377143	0.480706	33.3049	26.4537	107.383	84.0638	86.8707	96.46
C17G10.2	WBGene00015916	-2.67766	0.000462787	0.00189233	152.811	336.34	174.497	38.7136	56.4659	10.2435
C17G10.3	WBGene00015917	-4.05068	0.0047155	0.0139464	52.896	102.98	45.006	11.061	0	0
C17G10.6	WBGene00015918	4.06766	0.0933789	0.164428	0	0	3.9479	9.40187	58.6377	0
C17G10.7	WBGene00015919	1.99671	0.0069527	0.0194709	133.22	19.8403	56.8497	294.776	297.532	244.991
C17G10.9	WBGene00015920	-1.05654	0.0289682	0.0637835	481.941	406.253	553.495	285.374	143.337	261.21
C17H1.1	WBGene00007654	5.63713	0.103411	0.178016	0	0	0	3.31831	21.7177	0
C17H1.10	WBGene00044237	5.27568	0.178701	0.268876	0	0	0	0	19.5459	0
C17H1.5	WBGene00007658	-5.70305	0.0813891	0.147029	0	22.6746	6.31664	0	0	0
C17H1.7	WBGene00007660	-4.46991	0.0721375	0.133874	0	19.8403	26.8457	1.65915	0	0
C17H1.9	WBGene00007662	-4.09486	0.297684	NA	0	0	9.47495	0	0	0
C17H11.1	WBGene00015921	2.67992	0.000687114	0.00264956	110.69	24.5641	17.3707	400.962	312.734	262.064
C17H11.2	WBGene00015922	1.58711	0.036108	0.0764645	79.344	14.1716	41.0581	135.498	156.367	112.679
C17H11.4	WBGene00015924	1.05137	0.796119	NA	0	0	0	0.553051	0	0
C17H11.5	WBGene00015925	0.249261	0.922982	0.945631	38.2027	0	0	8.84882	36.92	0
C17H11.6	WBGene00015926	2.79334	9.66e-11	2.46e-09	388.884	271.15	252.665	1659.71	2597.43	2070.9
C17H12.10	WBGene00015935	2.54894	1.55e-05	9.95e-05	103.833	38.7358	41.0581	384.924	367.029	320.964
C17H12.11	WBGene00015936	-3.41758	0.0317729	0.068817	20.5707	37.791	51.3227	9.40187	0	0
C17H12.12	WBGene00015937	-1.38588	0.351748	0.454788	7.83645	72.7476	34.7415	16.5915	28.233	0
C17H12.2	WBGene00015928	-0.915785	0.0778779	0.142028	220.4	381.689	296.882	138.263	221.52	119.508
C17H12.3	WBGene00015929	-3.72638	0.00313391	0.00985524	36.2436	89.7536	60.7976	2.76526	13.0306	0
C17H12.4	WBGene00015930	-2.40554	0.0996765	0.172761	8.816	126.6	37.1102	11.6141	21.7177	0
C17H12.5	WBGene00015931	-7.48936	1.7e-05	0.000108034	23.5093	42.5148	33.9519	0	0	0
C17H12.6	WBGene00015932	-2.11035	0.210164	0.302399	0	73.6924	27.6353	3.87136	2.17177	17.0726
C17H12.8	WBGene00015933	-5.86472	7.47e-13	3.05e-11	376.149	2664.26	2662.46	57.5173	17.3741	21.3407
C18A11.1	WBGene00015947	-0.970092	0.198095	0.290017	38.2027	146.44	112.12	57.5173	30.4047	62.3149
C18A11.2	WBGene00015948	1.49355	0.0498056	0.0992132	362.436	44.4044	235.295	538.672	419.151	849.36
C18A11.3	WBGene00015949	-3.42344	3.57e-05	0.000205812	55.8347	380.744	142.124	21.0159	17.3741	15.3653
C18A3.1	WBGene00015939	-1.27844	0.520301	0.61972	33.3049	6.61342	12.6333	21.0159	0	0
C18A3.10	WBGene00015946	-4.70134	0.00258101	0.00836768	19.5911	37.791	31.5832	2.76526	0	0
C18A3.2	WBGene00015940	-0.73591	0.407627	0.511166	208.645	101.091	52.1122	87.3821	15.2024	112.679
C18A3.3	WBGene00015941	-2.70753	8.28e-05	0.000424635	348.722	684.961	437.427	69.1314	132.478	26.4625
C18A3.7	WBGene00015944	-7.21052	0.000218107	0.000981901	6.85689	41.5701	33.9519	0	0	0
C18B10.6	WBGene00015963	0.190052	0.932158	0.952127	13.7138	0	8.68537	4.42441	21.7177	0
C18B12.10	WBGene00195785	-4.2416	0.0446582	0.0908966	10.7751	12.2821	7.10622	1.1061	0	0
C18B12.4	WBGene00007666	0.700833	0.0791424	0.143792	476.064	637.723	435.058	897.602	860.02	759.729
C18B12.6	WBGene00007668	-2.04834	0.00270636	0.00870884	132.24	227.691	116.068	61.3887	21.7177	29.877
C18B2.1	WBGene00015952	1.75835	0.264868	0.361884	9.79556	0	5.52706	27.6526	6.5153	17.0726
C18B2.2	WBGene00015953	8.43143	3.11e-07	3.24e-06	0	0	0	96.7839	26.0612	47.8032
C18B2.3	WBGene00015954	-1.10664	0.124846	0.205603	658.261	487.504	649.034	454.055	317.078	62.3149
C18B2.4	WBGene00015955	0.644676	0.185044	0.275698	569.122	322.168	469.8	786.992	469.102	868.994
C18B2.5	WBGene00015956	-1.77423	0.000849475	0.00319841	445.698	946.664	1229.38	296.435	221.52	247.552
C18C4.17	WBGene00219824	-3.39552	0.389718	NA	5.87733	0	0	0	0	0
C18C4.7	WBGene00015968	-1.3101	0.0657798	0.124448	72.4871	205.016	79.7475	43.138	67.3248	34.9988
C18D1.2	WBGene00007669	0.0344546	0.992969	NA	2.93867	0	0	2.76526	0	0
C18D11.1	WBGene00007679	-3.6303	7.24e-05	0.000378838	134.199	1214.98	360.048	81.2985	13.0306	41.8278
C18D11.10	WBGene00194727	1.91423	0.483252	0.58534	0	0	7.10622	8.84882	0	17.9262
C18D11.3	WBGene00007681	-2.65571	1.66e-05	0.000105968	137.138	263.592	277.142	37.0544	49.9506	22.1943
C18D11.6	WBGene00007682	-4.05593	0.124363	0.205091	0	19.8403	15.002	1.65915	0	0
C18D11.7	WBGene00044232	-5.63943	0.0869375	0.154976	0	19.8403	7.89579	0	0	0
C18D11.9	WBGene00045211	1.05137	0.796119	NA	0	0	0	0.553051	0	0
C18D4.10	WBGene00077438	-3.13148	0.42859	NA	4.89778	0	0	0	0	0
C18D4.12	WBGene00219493	-4.6883	0.0170133	0.0410612	6.85689	17.9507	16.5812	1.1061	0	0
C18D4.4	WBGene00007674	1.61916	0.688888	NA	0	0	0	1.1061	0	0
C18D4.6	WBGene00007675	4.40319	2.28e-05	0.000139955	12.7342	0	4.73748	90.1473	147.68	130.605
C18D4.8	WBGene00007677	-0.462701	0.868833	0.906584	10.7751	0	0.789579	6.08356	2.17177	0
C18E3.1	WBGene00015970	-6.72634	0.00079981	0.00303084	25.4685	11.3373	22.1082	0	0	0
C18E3.3	WBGene00015972	0.668311	0.238929	0.331958	81.3031	57.6312	48.1643	112.822	97.7295	86.2165
C18E3.5	WBGene00015974	-2.59242	0.0527123	0.103983	21.5502	53.8521	48.9539	13.8263	6.5153	0
C18E3.9	WBGene00015976	-1.55356	0.178804	0.268959	58.7733	40.6253	65.5351	19.9098	0	34.9988
C18E9.14	WBGene00199203	-3.83281	0.330291	NA	0	0	7.89579	0	0	0
C18E9.2	WBGene00007683	-2.55904	4.57e-07	4.58e-06	1727.94	4022.85	1783.66	408.152	403.949	466.081
C18E9.4	WBGene00007684	-1.75753	8.8e-05	0.000446596	710.178	982.565	1163.84	303.625	330.109	212.553
C18E9.5	WBGene00007685	-2.07966	0.0205904	0.0481261	37.2231	325.947	265.299	37.6075	23.8894	86.2165
C18E9.7	WBGene00007687	-2.22079	0.0226988	0.0522523	213.543	79.361	109.752	28.7587	2.17177	53.7786
C18E9.8	WBGene00007688	-5.9385	3.2e-05	0.000187226	28.4071	46.2939	42.6373	0.553051	2.17177	0
C18E9.9	WBGene00007689	-1.98699	0.0213613	0.0496318	95.9965	380.744	348.205	82.9577	13.0306	110.118
C18F10.2	WBGene00015977	3.88139	0.000526658	0.00211357	20.5707	0	7.89579	102.314	225.864	91.3382
C18F10.7	WBGene00015978	0.323495	0.474016	0.576529	335.008	287.211	335.571	418.66	503.85	278.283
C18G1.1	WBGene00015980	3.13035	2.27e-06	1.84e-05	39.1822	15.1164	21.3186	287.034	125.962	245.845
C18G1.6	WBGene00015984	2.32417	0.281118	0.380014	8.816	0	1.57916	36.5014	15.2024	0
C18G1.7	WBGene00015985	6.99171	0.00745575	0.0206555	0	0	0	17.6976	0	45.2423
C18G1.8	WBGene00015986	3.99143	0.0114487	0.0295792	10.7751	0	0	29.3117	95.5578	45.2423
C18G1.9	WBGene00015987	-7.17436	0.000245346	0.00108756	6.85689	38.7358	34.7415	0	0	0
C18H2.1	WBGene00015988	-2.08379	0.322732	0.42506	15.6729	7.5582	7.10622	6.63661	0	0
C18H2.2	WBGene00015989	-0.247802	0.911548	0.937126	12.7342	0	7.10622	4.42441	0	11.9508
C18H2.3	WBGene00015990	-3.08212	0.4361	NA	0	4.72387	0	0	0	0
C18H2.5	WBGene00015992	-5.26754	0.137944	0.221859	0	15.1164	6.31664	0	0	0
C18H7.1	WBGene00015993	5.06301	8.43e-06	5.87e-05	0	30.2328	9.47495	537.013	679.763	110.972
C18H7.11	WBGene00044457	-4.76482	0.0238	0.0542632	0	188.955	20.5291	7.18966	0	0
C18H7.12	WBGene00189987	-2.89766	0.0134049	0.0337328	3.91822	193.679	251.086	25.9934	8.68707	24.7552
C18H7.4	WBGene00015994	-4.73787	0.000474361	0.0019315	23.5093	131.324	30.004	1.65915	6.5153	0
C18H7.6	WBGene00015996	4.76012	3.88e-06	2.95e-05	27.4276	0	10.2645	366.673	430.01	222.797
C18H7.7	WBGene00015997	-7.78879	0.00126682	0.00453248	0	95.4222	27.6353	0	0	0
C18H9.1	WBGene00016000	1.61916	0.688888	NA	0	0	0	1.1061	0	0
C18H9.3	WBGene00016002	-0.358449	0.397585	0.501477	718.014	813.451	524.281	435.251	582.034	587.296
C18H9.5	WBGene00016003	-4.86107	0.000817227	0.00308972	25.4685	260.758	97.9079	12.1671	0	0
C18H9.6	WBGene00016004	-2.45258	0.0154279	0.0378846	36.2436	199.347	115.279	30.4178	2.17177	29.877
C23F12.3	WBGene00016008	-3.63556	0.314219	0.416076	25.4685	0	0	1.65915	0	0
C23F12.4	WBGene00016009	0.608759	0.555142	0.651733	39.1822	70.8581	64.7455	70.7905	6.5153	187.798
C23G10.1	WBGene00016010	-4.57672	0.0373619	0.0786537	0	48.1835	7.89579	1.1061	0	0.853628
C23G10.10	WBGene00016016	6.6141	0.0164977	0.040004	0	0	0	30.4178	0	17.9262
C23G10.11	WBGene00016017	3.99426	0.311438	NA	0	0	0	7.74272	0	0
C23G10.14	WBGene00271647	3.37306	0.395127	NA	0	0	0	4.97746	0	0
C23G10.2	WBGene00016011	-3.08917	3.74e-06	2.86e-05	377.129	1057.2	841.692	138.263	91.2142	37.5596
C23G10.5	WBGene00016012	-0.258938	0.818744	0.868421	13.7138	33.0671	7.10622	6.63661	17.3741	21.3407
C23G10.6	WBGene00016013	-8.87403	9.7e-12	2.99e-10	91.0987	1031.69	267.667	2.2122	0	0
C23G10.7	WBGene00016014	-1.35206	0.0260773	0.0583308	103.833	151.164	152.389	50.3276	78.1836	33.2915
C23G10.8	WBGene00016015	0.254715	0.634056	0.718483	172.402	250.365	279.511	293.117	165.054	377.304
C23H3.11	WBGene00199372	4.81601	0.220312	0.312102	0	0	0	3.31831	10.8588	0
C23H3.2	WBGene00016018	-3.77988	2e-08	2.81e-07	229.216	814.396	563.76	59.7295	30.4047	25.6088
C23H3.3	WBGene00016019	-0.792514	0.188389	0.279492	111.669	69.9133	135.018	64.707	73.8401	45.2423
C23H3.5	WBGene00016021	0.10747	0.881323	0.915494	48.9778	82.1954	60.008	42.5849	45.6071	116.947
C23H3.9	WBGene00016022	3.03834	1.59e-06	1.35e-05	110.69	25.5089	86.8537	574.62	523.396	734.12
C23H4.10	WBGene00197205	1.61916	0.688888	NA	0	0	0	1.1061	0	0
C23H4.11	WBGene00197362	2.3444	0.558942	NA	0	0	0	2.2122	0	0
C23H4.2	WBGene00007691	-0.778029	0.702587	0.774998	4.89778	17.9507	34.7415	0	0	33.2915
C23H4.3	WBGene00007692	-2.05501	0.130677	0.212898	9.79556	51.0178	50.5331	5.53051	0	20.4871
C23H4.6	WBGene00007694	-3.69217	0.00810512	0.0221882	13.7138	52.9074	26.8457	3.31831	4.34353	0
C23H4.7	WBGene00007695	-4.57766	0.0098765	0.0261945	11.7547	42.5148	11.8437	2.2122	0	0
C23H4.8	WBGene00044132	-0.148823	0.925777	0.947432	0	34.9567	8.68537	12.1671	10.8588	16.2189
C23H5.11	WBGene00044649	4.1587	0.291427	NA	0	0	0	6.63661	2.17177	0
C23H5.12	WBGene00077523	0.624716	0.869543	0.90698	5.87733	0	0	8.84882	0	0
C23H5.13	WBGene00199050	2.03706	0.61266	NA	0	0	0	1.65915	0	0
C23H5.15	WBGene00219423	-4.47591	0.231374	0.323869	0	0	22.8978	0.553051	0	0
C23H5.8	WBGene00016027	-4.90254	3.25e-08	4.35e-07	403.577	1576.83	1163.84	73.5558	4.34353	24.7552
C24A1.3	WBGene00016030	-3.2033	0.00119515	0.00430804	165.545	146.44	190.289	37.0544	0	15.3653
C24A1.6	WBGene00200602	2.03706	0.61266	NA	0	0	0	1.65915	0	0
C24A11.1	WBGene00016040	-3.59322	0.0904457	0.160189	0	89.7536	70.2726	12.7202	0	0
C24A11.2	WBGene00016041	2.38642	0.239514	0.332687	6.85689	0	5.52706	5.53051	0	58.9004
C24A3.1	WBGene00016032	3.92752	0.00371425	0.0114013	0.979556	14.1716	0	56.9643	125.962	46.9496
C24A3.12	WBGene00198289	2.58794	0.518014	NA	0	0	0	2.76526	0	0
C24A3.2	WBGene00016033	1.19364	0.0354031	0.0752043	1975.76	793.61	780.105	2975.97	1752.62	3387.2
C24A3.4	WBGene00016034	0.444145	0.559763	0.655707	43.1005	27.3985	33.9519	23.7812	65.153	54.6322
C24A8.5	WBGene00016039	-3.72625	0.0630791	0.120377	11.7547	17.0059	7.10622	2.2122	0	0
C24A8.6	WBGene00044004	4.65256	0.00102716	0.00377245	0	0	13.4229	94.5717	62.9812	185.237
C24B5.1	WBGene00016044	2.53667	3.85e-05	0.000220228	174.361	96.367	44.2165	603.932	488.648	731.559
C24B5.4	WBGene00016046	-1.00772	0.473988	0.576529	25.4685	68.0238	44.2165	15.4854	54.2942	0
C24B9.3	WBGene00016048	-1.5379	0.0194022	0.0458572	188.075	743.537	541.652	121.671	136.821	248.406
C24D10.1	WBGene00016053	-5.86117	0.0648738	0.123102	7.83645	0	24.477	0	0	0
C24D10.2	WBGene00016054	-11.4308	2.05e-16	1.76e-14	400.638	876.751	258.982	0	0	0
C24D10.4	WBGene00016055	-2.01048	0.0161094	0.0392185	78.3645	226.746	65.5351	39.2666	10.8588	40.1205
C24D10.49	WBGene00235380	1.97222	0.161683	0.250166	0	14.1716	6.31664	16.0385	26.0612	38.4133
C24D10.5	WBGene00016056	1.44084	0.610362	0.699196	0	0	9.47495	6.63661	19.5459	0
C24D10.6	WBGene00016057	-1.56422	0.0469919	0.0946513	77.3849	256.034	164.233	66.9192	17.3741	81.9483
C24F3.2	WBGene00007697	-0.103509	0.918618	0.942392	16.6524	32.1223	57.6393	14.3793	71.6683	15.3653
C24G6.2	WBGene00016059	-1.06912	0.175781	0.265992	47.0187	269.261	108.962	47.0093	95.5578	61.4612
C24G6.8	WBGene00016062	-0.167677	0.769601	0.829942	258.603	221.077	317.411	208.5	375.716	128.898
C24H10.1	WBGene00016067	1.96547	0.00299362	0.00947567	33.3049	53.8521	22.8978	85.1699	178.085	167.311
C24H10.2	WBGene00016068	-2.64139	0.00186731	0.00631911	96.976	109.594	101.856	25.4403	2.17177	19.6335
C24H10.3	WBGene00016069	-4.14847	0.277563	0.376018	0	0	21.3186	0	2.17177	0
C24H10.4	WBGene00016070	1.05137	0.796119	NA	0	0	0	0.553051	0	0
C24H11.1	WBGene00007699	-4.09486	0.297684	NA	0	0	9.47495	0	0	0
C24H11.5	WBGene00007702	-0.0728344	0.946605	0.96258	63.6711	30.2328	7.89579	62.4948	19.5459	13.6581
C24H12.1	WBGene00016071	7.07466	0.007847	0.021557	0	0	0	25.9934	41.2636	0
C24H12.11	WBGene00016080	1.61916	0.688888	NA	0	0	0	1.1061	0	0
C24H12.19	WBGene00235338	1.06065	0.713548	0.785036	0	0	11.0541	1.65915	0	21.3407
C24H12.2	WBGene00016072	-0.821295	0.699969	0.772784	30.3662	0	9.47495	13.8263	8.68707	0
C24H12.3	WBGene00023244	2.3444	0.558942	NA	0	0	0	2.2122	0	0
C24H12.4	WBGene00016073	-0.636209	0.110542	0.187465	428.066	532.853	399.527	299.754	286.673	288.526
C24H12.5	WBGene00016074	-2.47041	0.0658696	0.124575	74.4462	77.4715	78.9579	4.42441	39.0918	0
C24H12.6	WBGene00016075	-3.32071	0.400505	NA	0	0	5.52706	0	0	0
C24H12.7	WBGene00016076	-2.80807	0.479154	NA	3.91822	0	0	0	0	0
C25A1.1	WBGene00007705	-0.161801	0.773585	0.833112	104.812	83.1401	79.7475	84.6168	56.4659	96.46
C25A1.15	WBGene00007713	2.58794	0.518014	NA	0	0	0	2.76526	0	0
C25A1.16	WBGene00077526	-0.504835	0.257378	0.353205	357.538	315.555	222.661	208.5	201.974	220.236
C25A1.17	WBGene00077527	-4.51744	0.225283	0.317065	0	23.6194	0	0.553051	0	0
C25A1.20	WBGene00303030	-3.04308	0.301972	0.403136	11.7547	0	9.47495	2.2122	0	0
C25A1.5	WBGene00007707	0.68327	0.171513	0.261166	188.075	427.038	270.826	535.353	475.617	411.449
C25A11.10	WBGene00219374	2.87455	0.267751	0.365125	0	0	5.52706	21.569	19.5459	0
C25A11.2	WBGene00016087	1.31323	0.0669046	0.126156	17.632	28.3432	45.006	52.5399	82.5272	92.1919
C25A6.1	WBGene00016081	2.60977	0.00198187	0.0066385	23.5093	17.0059	10.2645	34.2892	173.741	103.289
C25A8.2	WBGene00016083	-8.50093	3.8e-06	2.9e-05	6.85689	152.109	42.6373	0	0	0
C25A8.5	WBGene00016085	-5.7421	0.000696148	0.00267624	5.87733	78.4163	34.7415	1.65915	0	0
C25B8.8	WBGene00044297	2.6693	0.0301153	0.0658248	33.3049	17.9507	0	128.308	54.2942	141.702
C25D7.1	WBGene00007714	-7.97678	5.74e-06	4.16e-05	11.7547	65.1894	63.1664	0	0	0
C25D7.10	WBGene00007720	-1.20085	0.0651075	0.123404	110.69	149.274	127.122	68.5783	23.8894	73.412
C25D7.12	WBGene00007721	2.03706	0.61266	NA	0	0	0	1.65915	0	0
C25D7.15	WBGene00007722	1.54256	0.0305191	0.0665924	120.485	53.8521	26.8457	240.024	134.65	209.139
C25D7.16	WBGene00050940	-5.36456	0.0383676	0.0803396	0	29.288	13.4229	0.553051	0	0
C25D7.5	WBGene00007717	-0.807831	0.677677	0.755117	0	70.8581	12.6333	8.84882	0	38.4133
C25E10.10	WBGene00016099	1.66524	0.0672921	0.12677	6.85689	76.5267	93.1704	128.861	288.845	144.263
C25E10.11	WBGene00016100	2.84736	0.102799	0.177165	0	17.0059	0	61.9417	19.5459	40.1205
[truncated: 17,533 more rows]
