# Supplementary material for: Profiling neural editomes reveals a molecular mechanism to regulate RNA editing during development
Source: HighWire-hosted journal article supplement (doi:10.1101/gr.267575.120), 2020-12-18
Supplement: Supplemental_Table_S7.xlsx [file Supplemental_Table_S7.xlsx]

## Sheet: ADR-2 dependent diff exp genes 
Supplemental Table 7: ADR-2 dependent differentially expressed genes in neural development (related to Supplemental Dig. S3D). Genes that are differentially expressed in wild-type neural cells from L1 to adult stages were overlapped with differentially expressed genes in adr-2(-) neural cells from L1 to adult stages. Genes that decrease and increase in expression during neural development only in…
ADR-2 dependent downregulated in adults	ADR-2 dependent upregulated in adults
marc-6	sep-1
2RSSE.1	21ur-12975
4R79.2	abf-2
aakb-1	AC7.3
aakb-2	acbp-4
aakg-2	acd-2
abl-1	acdh-12
acd-4	acdh-4
acl-12	acdh-7
acl-14	acdh-8
acl-8	acdh-9
acp-4	acp-3
acp-6	act-3
acr-11	adt-2
acr-17	alh-10
acr-3	amt-1
acr-6	amx-2
acr-8	anmt-3
acs-21	anr-10
ador-1	apb-3
adr-1	arrd-10
aho-3	arrd-7
ain-2	art-1
akir-1	arx-6
alg-2	atf-5
alh-11	atp-2
ama-1	atp-5
aman-3	attf-6
anr-34	B0035.15
anr-45	B0035.6
anr-7	B0041.1
apg-1	B0041.8
aph-2	B0205.4
aptf-4	B0207.1
aqp-5	B0207.9
aqp-6	B0228.7
arf-6	B0252.5
arrd-16	B0285.4
arrd-18	B0310.2
arrd-19	B0334.6
arrd-5	B0336.7
asp-16	B0348.5
atf-6	B0361.11
atg-3	B0361.9
atg-4.1	B0365.9
atg-5	B0393.5
atg-7	B0454.26
atg-9	B0454.8
athp-1	B0457.2
atln-1	B0495.2
attf-3	B0564.2
B0001.5	basl-2
B0024.15	bath-29
B0238.15	bath-4
B0250.12	best-14
B0250.18	best-18
B0294.1	best-3
B0302.2	best-6
B0303.7	best-8
B0361.8	bir-2
B0416.3	bmy-1
B0457.6	brd-1
B0491.6	btb-14
B0507.15	btb-2
B0507.2	bus-12
B0507.3	C01A2.2
B0511.13	C01C10.2
B0511.6	C01F1.3
B0563.18	C01F1.5
bar-1	C01G10.14
bath-37	C01G6.9
bath-38	C01H6.8
bath-39	C02F12.5
bath-40	C03F11.2
bath-43	C03H5.5
bbs-2	C04C3.14
bbs-9	C04E12.2
bed-1	C04F12.16
ben-1	C04G2.2
best-22	C05C8.2
best-9	C05D11.5
bre-1	C05D9.9
bre-2	C05E11.7
bre-4	C05E7.1
btb-5	C06C3.4
btbd-10	C06C6.9
btf-1	C06G3.8
C01F1.4	C06G4.4
C01G5.7	C06H5.6
C02B10.5	C07B5.8
C02F12.9	C07E3.10
C03A3.1	C07E3.9
C03A3.2	C07H4.1
C03A3.3	C08F11.12
C03B1.1	C08F8.2
C03B1.2	C09B8.3
C03E10.3	C09B8.8
C03H5.7	C09B9.4
C04A11.1	C09D4.9
C04C3.6	C09G4.4
C04E6.13	C10A4.10
C04E6.8	C10C5.2
C04F12.8	C10G11.10
C04F6.7	C11H1.3
C04G6.4	C12D5.9
C04H4.1	C13F10.5
C04H5.1	C14A4.13
C05A9.2	C14A4.7
C05C12.6	C14A4.8
C05C9.2	C14A6.6
C05D12.2	C15A11.4
C05D2.10	C15B12.1
C05G5.1	C15C6.4
C05G5.5	C15C8.4
C06A1.2	C16A11.5
C06A5.1	C16C2.4
C06A6.2	C16C8.14
C06G3.4	C16C8.18
C06G3.5	C16C8.22
C06H5.8	C16C8.5
C07A12.2	C16D9.4
C07A9.9	C16E9.1
C07C7.1	C17B7.2
C07G3.10	C17C3.9
C08B6.5	C17F4.3
C08D8.7	C17H1.10
C08E3.1	C17H12.12
C08E3.13	C18B12.10
C09B9.1	C18C4.7
C09E7.10	C18H2.5
C09G1.3	C23G10.1
C09G1.5	C23H3.3
C10A4.3	C23H5.15
C10C6.7	C24D10.1
C10G11.7	C24D10.6
C11E4.8	C24G6.2
C12D5.4	C24H10.3
C12D5.5	C24H12.5
C12D8.15	C25D7.16
C13A10.2	C25D7.5
C13A2.3	C25E10.12
C14A11.5	C25E10.4
C14A11.9	C25E10.5
C14E2.5	C25E10.8
C14E2.6	C25F9.4
C14F11.2	C26B2.7
C15A7.2	C26B9.7
C15C8.5	C26C6.6
C15H9.4	C27A7.3
C16A3.15	C27B7.9
C16A3.2	C27D9.2
C16C10.9	C27H6.8
C17F4.11	C28A5.2
C17G10.6	C28A5.6
C17H1.1	C28D4.4
C17H11.2	C28D4.5
C18A11.2	C28D4.7
C18B12.4	C28G1.6
C18B2.4	C29A12.1
C18D11.10	C29G2.6
C18F10.7	C29H12.2
C18G1.6	C30G4.4
C23G10.8	C30H6.8
C23H3.11	C30H6.9
C24A11.2	C31B8.8
C24A3.2	C31C9.7
C24H12.11	C31H2.14
C25A1.5	C31H2.4
C25A11.10	C32H11.5
C25A11.2	C32H11.6
C25B8.8	C32H11.8
C25D7.15	C33A12.19
C25E10.11	C33B4.2
C25E10.16	C33D3.3
C25F9.11	C33F10.4
C25G4.2	C33G3.4
C25H3.10	C33G8.4
C27A12.7	C34C12.6
C27A7.5	C34E10.9
C27A7.8	C34E11.4
C29F5.3	C34F11.11
C29F7.11	C34F6.1
C29F9.1	C34F6.7
C30B5.13	C34H4.5
C30E1.9	C35A5.10
C30F2.4	C35A5.11
C30H6.10	C35A5.6
C30H6.12	C35C5.8
C31B8.16	C35D10.1
C31E10.1	C35D10.6
C31E10.6	C35E7.7
C31H5.6	C35E7.8
C32D5.10	C36A4.5
C32D5.11	C37A2.8
C32D5.6	C37A5.3
C32D5.8	C37C3.1
C33A11.2	C37C3.7
C33B4.4	C38C6.3
C33D9.13	C38C6.5
C33D9.9	C38D4.7
C33E10.3	C38H2.2
C34D1.4	C39D10.8
C35B1.2	C41D11.9
C36A4.10	C42C1.4
C36B1.9	C42D4.1
C36E6.1	C44B9.2
C36E6.2	C44B9.3
C37C3.17	C44C10.3
C37C3.2	C44C10.9
C37H5.3	C45B2.3
C39B10.5	C45G7.4
C39F7.5	C45G9.15
C39H7.2	C46A5.5
C40H1.9	C46G7.5
C40H5.2	C46H11.6
C41G7.9	C47A4.4
C41H7.6	C47A4.5
C43H6.4	C47E8.10
C43H6.6	C47G2.3
C44B11.1	C48B4.13
C44B11.4	C49C3.2
C44B12.6	C49C3.20
C44B7.2	C49C3.7
C44H4.4	C49C8.1
C44H4.8	C49G7.7
C44H9.7	C49G9.2
C45B11.7	C49H3.12
C45G9.13	C50D2.5
C46A5.8	C50E3.11
C46F11.4	C50F4.10
C46F11.5	C50F4.8
C46H3.2	C50F7.6
C47C12.2	C53A5.13
C47D2.1	C53C11.2
C47G2.4	C54C8.2
C49A1.1	C54D10.10
C49C3.15	C54F6.12
C50E3.6	C55A6.1
C50F7.5	C55B7.10
C50H11.13	C55C3.1
C52A11.3	C56E6.2
C52B11.4	capg-2
C53A5.6	cbl-1
C53A5.9	cbs-2
C53C11.1	ccg-1
C53C11.5	cchl-1
C53C7.3	CD4.10
C53C7.5	CD4.8
C54C6.5	cdh-10
C54C6.6	cdo-1
C54D10.5	cdr-1
C54D2.2	cdt-2
C54E10.3	CE7X_3.2
C54E10.6	ceh-12
C54E4.12	ceh-99
C56G7.3	cept-1
cah-1	chaf-2
cal-7	che-10
calm-1	chil-10
calu-2	chil-13
cap-1	cid-1
cap-2	cima-1
capg-1	cin-4
cat-2	cka-1
catp-6	clec-142
CC8.3	clec-144
ccr-4	clec-190
cct-5	clec-204
cct-6	clec-218
cdc-14	clec-223
cdc-25.2	clec-225
cdc-26	clec-246
cdc-73	clec-247
cdk-12	clec-260
cdk-8	clec-60
cdk-9	clec-70
cec-6	clh-1
cec-8	clh-3
ced-12	clic-1
ceh-16	clk-1
ceh-37	clpp-1
ceh-45	cnc-10
ceh-5	cni-1
ceh-53	cogc-6
ceh-54	col-107
ceh-63	col-141
ceh-8	col-147
ceh-88	col-153
ceh-89	col-166
ces-2	col-176
chc-1	col-186
che-1	coq-1
chil-22	cor-1
chin-1	crn-1
chn-1	crn-4
cit-1.2	csp-2
clc-3	csq-1
clec-103	cutl-24
clec-12	cutl-4
clec-135	cutl-8
clec-20	cyk-1
clec-217	cyn-12
clec-232	cyn-17
clec-67	cyp-14A5
clec-76	cyp-31A5
clec-77	cyp-32A1
clec-93	cyp-34A8
clh-5	cyp-35A5
clr-1	cyp-35C1
cng-1	cyp-43A1
cog-1	cysl-2
col-35	D1022.9
col-36	D1037.1
coq-2	D1037.5
coq-3	D1054.1
cpsf-1	D1054.6
crb-1	D1081.11
csk-1	D1081.3
cua-1	D1086.20
cul-2	D1086.8
cul-5	D2007.1
cwp-5	D2024.1
cyl-1	D2045.5
cyld-1	D2062.1
cyp-13A1	D2092.4
cyp-25A4	dad-1
cyp-31A1	daf-36
cyp-33C11	daf-6
cyp-33C12	dao-2
cyp-33C4	dap-3
cyp-33C8	DC2.5
cyp-33C9	dct-9
cyp-34A10	ddo-2
cyp-36A1	decr-1.1
D1007.18	del-6
D1014.2	DH11.2
D1053.3	dhhc-13
D2024.5	dhod-1
D2045.2	dhp-1
D2085.3	dhs-23
D2096.16	dhs-27
D2096.5	djr-1.1
daf-10	dlc-6
daf-21	dml-1
daf-25	dnc-2
daf-28	dnj-21
dagl-2	dnj-24
dbl-1	dnj-3
dcn-1	dnj-9
dct-15	dpf-4
ddx-17	dpf-6
deb-1	dpy-10
deg-3	dpy-6
del-1	drsh-1
del-7	dss-1
del-8	dur-1
dgk-2	dylt-1
dhhc-11	E01A2.5
dhs-30	E02H1.6
dig-1	E04F6.6
dip-2	E04F6.8
dlg-1	eaf-1
dmd-10	ebax-1
dmd-5	egg-3
dmd-8	egl-15
dnj-19	ego-1
dnj-25	eif-1.A
dnj-5	ekl-1
dod-3	elb-1
dop-3	elpc-1
dpf-7	elt-2
dpff-1	emb-5
dpy-19	erfa-3
drap-1	eri-5
dsbn-1	exc-4
dsl-3	exos-3
dyci-1	exos-4.2
E02A10.4	F01D4.3
E04D5.2	F01D5.2
E04D5.5	F01F1.2
E04F6.2	F02D10.6
eak-4	F02D8.4
eak-6	F07E5.7
eak-7	F07E5.8
ebp-1	F07F6.1
EEED8.10	F07F6.2
eel-1	F08A8.8
efk-1	F08F1.3
egas-2	F09E8.1
egl-18	F09E8.2
egl-23	F10C2.7
egl-26	F10E9.12
egl-46	F10E9.7
egl-6	F11A10.6
egrh-3	F11A5.5
ehbp-1	F11E6.4
ehn-3	F11E6.7
elc-1	F11E6.8
enol-1	F11F1.1
epg-5	F12E12.11
ephx-1	F13B12.2
epn-1	F13B9.2
eps-8	F13D2.1
erg-28	F13H6.3
ergo-1	F13H8.2
ethe-1	F14B8.4
etr-1	F14F3.4
ets-5	F14F9.5
exoc-8	F14H8.8
F01D5.1	F15B10.3
F02C9.2	F15B9.11
F02D8.1	F15D3.4
F02D8.5	F15D3.6
F02D8.9	F15E6.10
F02E11.2	F15E6.3
F07B7.12	F15H9.1
F07C3.3	F16C3.2
F07C6.4	F16C3.4
F08F8.9	F16G10.5
F08G12.2	F16H6.7
F08G12.3	F17B5.1
F08G12.8	F17H10.2
F09E10.5	F18C5.5
F09E10.7	F18E9.3
F09E5.12	F19C6.8
F09E5.14	F19C7.4
F09E5.16	F20C5.10
F09F3.8	F20D1.9
F09F7.7	F20D6.1
F09G8.5	F21C10.4
F10A3.7	F21C3.6
F10B5.9	F21F3.4
F10G2.7	F21F8.5
F10G7.10	F22B8.4
F10G7.9	F22B8.7
F11C1.4	F22D6.9
F11E6.10	F22E12.1
F12F3.7	F23D12.3
F12F6.1	F23F1.4
F13A2.1	F23F1.6
F13A2.10	F25B5.5
F13A2.9	F25E5.8
F13B9.1	F25G6.8
F13D11.3	F25H8.1
F13H10.9	F26A1.3
F13H6.1	F26A1.4
F13H6.4	F26A10.28
F13H6.5	F26D10.11
F13H8.6	F26D2.10
F14B4.2	F26G1.1
F14D7.3	F26H9.5
F14F11.2	F28A10.1
F15A4.5	F28A10.4
F15G9.6	F28C1.1
F16B4.6	F28C6.4
F16F9.1	F28C6.5
F17C11.2	F28H7.8
F17C11.4	F29A7.6
F17E9.14	F29D10.2
F18G5.1	F30B5.7
F18H3.4	F31C3.16
F19B6.1	F31C3.6
F19C6.2	F31D5.2
F19H6.6	F31E3.6
F20A1.2	F32B6.10
F20B6.7	F32D1.11
F20C5.5	F32D8.12
F20D1.1	F32D8.5
F20D12.7	F32H2.11
F20D6.11	F34D10.9
F20D6.8	F35A5.4
F21D5.5	F35A5.5
F21F3.6	F35B12.9
F21G4.6	F35C11.2
F22E5.12	F35C12.3
F22F1.2	F35D2.1
F22F7.7	F35E2.10
F22G12.5	F35E2.5
F22H10.6	F36A4.2
F23A7.3	F36A4.5
F23A7.5	F36D3.16
F23C8.1	F36G9.13
F23F1.7	F36G9.15
F23G4.1	F36G9.3
F23H12.7	F36H12.14
F25B4.5	F36H5.10
F25D1.2	F37C12.10
F25E5.7	F37C12.18
F25F8.1	F37C4.4
F25H5.10	F37C4.8
F25H5.2	F38A5.6
F25H9.9	F38E1.3
F26A1.6	F38H4.6
F26A3.4	F39B2.3
F26B1.2	F40A3.2
F26C11.3	F40F8.4
F26D2.8	F40F9.10
F26F12.8	F40F9.5
F26F2.4	F40H3.2
F26F2.7	F40H3.3
F26G1.2	F41D9.2
F27C1.13	F41E7.1
F27C1.2	F41E7.20
F27D4.6	F41F3.1
F27E5.5	F41G3.5
F28B12.1	F42A10.7
F28C6.9	F42A8.1
F28E10.10	F42C5.5
F28F9.2	F42G8.7
F28F9.3	F43G6.16
F28H7.2	F43G9.12
F29F11.20	F43G9.3
F30A10.4	F43G9.8
F31A3.3	F44B9.2
F31B12.4	F44B9.8
F31C3.3	F44B9.9
F31D5.6	F44E2.9
F31F7.2	F44E7.3
F32A7.8	F44F4.9
F32B4.1	F44G4.3
F32B4.5	F44G4.5
F32B5.3	F45B8.3
F32D1.8	F45G2.10
F32D8.8	F45G2.9
F33D11.10	F45H11.8
F33H1.4	F46B6.5
F33H1.6	F46C5.10
F34D10.6	F46F2.3
F34H10.2	F46F3.3
F34H10.3	F46F5.14
F35B12.10	F46F5.2
F35B12.12	F46F5.4
F35E8.10	F46F5.7
F35H10.2	F46F5.9
F36D1.7	F47B3.4
F36D1.9	F47B3.7
F37A4.1	F47B7.2
F37A4.6	F47B7.4
F37C4.5	F47E1.4
F37D6.2	F48C1.6
F38A1.15	F48E8.2
F38B6.8	F49D11.10
F38B7.11	F49D11.14
F38C2.4	F52F12.9
F38E9.6	F53A3.7
F38G1.3	F53B3.5
F38H4.3	F53C11.3
F39B2.1	F53F4.13
F39E9.8	F53F4.25
F39E9.9	F53F8.3
F40A3.1	F53H1.1
F40E10.6	F54B11.11
F40E12.1	F54B8.1
F40F11.3	F54C1.1
F40F11.4	F54D10.7
F40F8.5	F54D5.15
F40H3.1	F54D5.7
F41C3.8	F54E7.9
F41E7.6	F55A11.1
F41E7.7	F55A11.11
F41G3.10	F55A11.4
F41G4.8	F55A11.6
F41H10.2	F55C10.4
F41H10.4	F55D12.5
F42A9.6	F55F10.3
F42C5.9	F55F8.3
F42E11.3	F55F8.9
F42E8.1	F55G1.5
F42G9.4	F55G1.9
F43B10.1	F56A11.5
F43C11.7	F56A8.9
F43E2.1	F56C11.6
F44E2.6	F56C3.9
F44E5.4	F56D5.2
F44F1.4	F56D6.14
F45E1.1	F56D6.17
F45E1.2	F56D6.19
F45E1.5	F56D6.23
F45E10.2	F56F4.3
F46A8.1	F56F4.4
F46B3.20	F56G4.4
F46C3.4	F56G4.7
F46F11.8	F56H1.3
F46G11.1	F56H11.2
F46H5.4	F57B10.4
F47B10.3	F57F4.1
F47D12.3	F57G9.6
F47D2.11	F57H12.5
F47E1.3	F58B3.7
F47F2.1	F58B4.4
F47G3.3	F58F12.3
F48C1.15	F58G1.9
F48C1.3	F58H1.3
F48C5.2	F59A2.5
F48E3.2	F59A3.2
F48E8.4	F59A3.8
F48G7.4	F59B10.4
F49D11.11	F59B10.5
F49F1.14	F59B2.15
F49H12.3	F59C6.16
F49H12.4	F59E11.2
F49H6.5	F59F5.7
F52C9.1	F59H5.1
F52D10.4	faah-3
F52D2.6	fbn-1
F52H2.1	fbxa-19
F52H2.7	fbxa-202
F53A2.3	fbxa-206
F53B7.4	fbxa-218
F53F4.17	fbxa-39
F53F4.8	fbxc-46
F53H1.3	fcd-2
F53H2.1	fce-1
F54B11.5	fem-3
F54B11.7	fer-1
F54B8.17	fip-2
F54B8.4	fip-5
F54F7.2	fipr-21
F55A4.3	fipr-22
F55C5.6	fipr-29
F55D12.1	fkb-7
F55E10.1	fmo-3
F55E10.4	gad-3
F55E10.5	gana-1
F55F3.4	gbh-1
F55G11.3	gcsh-1
F55G7.1	gfrp-1
F55G7.3	ghi-1
F56C4.1	gip-2
F56D1.2	glna-2
F56F10.2	glrx-21
F56F11.1	glt-5
F56H9.6	gly-11
F57B1.5	gly-6
F57B1.6	gmeb-2
F57G12.1	gna-1
F58D12.3	gop-2
F58D5.5	gpdh-1
F58E10.7	gpdh-2
F58H10.1	grd-12
F59A1.12	grd-16
F59A6.10	grl-10
F59A6.3	grsp-4
F59B2.14	gst-21
F59F3.6	gst-42
fat-1	gut-2
fat-2	H04D03.2
fbxa-10	H04M03.3
fbxa-124	H06A10.1
fbxa-135	H10E21.1
fbxa-169	H12D21.10
fbxa-173	H12D21.5
fbxa-186	H12D21.9
fbxa-192	H14A12.5
fbxa-213	H28O16.1
fbxa-44	H32C10.1
fbxa-46	H35B03.2
fbxa-81	H40L08.2
fbxb-53	haf-6
fbxb-72	haly-1
fbxb-88	har-2
fbxc-19	hcp-1
fbxc-32	hcp-3
fbxc-36	hdl-1
fbxc-52	him-10
fcho-1	him-19
fic-1	him-6
figl-1	his-1
fil-1	his-17
fkb-6	his-18
fkh-9	his-5
flap-1	his-59
flp-10	his-63
flp-15	his-64
flp-16	his-8
flp-17	hlh-19
flp-20	hlh-33
flp-24	hlh-8
flp-25	hop-1
flp-28	hpo-17
flp-3	hpo-3
flp-32	hpr-17
flp-4	hsp-12.3
flp-6	hum-9
flp-7	hut-1
flp-8	idh-2
flr-2	idhb-1
fmo-5	ifa-1
fre-1	immp-1
frl-1	irld-6
frm-4	irld-7
frm-5.2	isp-1
frm-9	JC8.7
frpr-1	jhdm-1
frpr-12	jmjd-1.1
frpr-13	K01D12.10
frpr-16	K02C4.2
frpr-18	K02D10.2
frpr-4	K02D3.2
frpr-6	K02E10.4
frpr-7	K02E10.6
frpr-9	K02E11.4
fsn-1	K02E11.5
fum-1	K02E11.6
fut-1	K02E11.7
fzo-1	K02F2.11
fzr-1	K02F3.9
gadr-4	K03H1.12
gap-3	K04C1.5
gba-2	K04C2.2
gbf-1	K04G2.7
gck-2	K05F1.10
gcl-1	K05F1.5
gcs-1	K06A1.2
gcy-1	K06A4.10
gcy-14	K06A4.8
gcy-15	K07A12.5
gcy-17	K07C5.2
gcy-20	K07E1.1
gcy-22	K07F5.14
gcy-23	K07F5.6
gcy-27	K08C7.1
gcy-29	K08C7.6
gcy-3	K08D12.3
gcy-33	K08D8.11
gdi-1	K08D8.4
gex-2	K08E3.2
gfi-3	K08F8.5
gfl-1	K08H10.6
ggr-3	K09A9.6
glb-10	K09C4.5
glb-13	K09C6.8
glb-15	K09C8.9
glb-21	K09D9.1
glb-29	K09F6.4
glb-3	K10D6.3
glc-2	K10H10.10
gln-1	K11C4.1
glo-4	K11H12.1
gly-12	K12B6.11
gly-4	K12B6.8
gmeb-1	K12C11.3
gpa-1	K12C11.7
gpa-16	K12D12.4
gpa-4	K12G11.6
gpa-5	K12H6.2
gpa-6	kin-15
gpa-9	kin-26
gpc-1	kin-31
gpc-2	klp-10
gpx-2	knl-2
grd-7	lact-2
gst-37	lact-9
gst-5	lagr-1
gta-1	lars-2
gtr-1	lat-2
guk-1	let-2
gyg-1	let-418
H01M10.1	let-653
H05C05.1	letm-1
H05C05.2	lgc-43
H11E01.3	lgc-44
H13N06.7	lin-29
H14E04.2	linc-15
H17B01.5	linc-48
H20J04.6	linc-61
H23L24.4	linc-7
H23N18.6	lipl-6
H31B20.2	lipl-7
H32K21.1	lips-11
H43I07.1	lpr-1
haf-1	lron-9
ham-1	lrx-1
ham-3	lsm-5
hcf-1	ltd-1
hda-1	M01G5.1
helq-1	M02D8.3
hex-3	M02D8.6
hgap-1	M02G9.3
hgo-1	M02G9.4
hil-8	M03B6.4
him-4	M04C3.2
his-71	M04D5.3
hlh-10	M05D6.3
hlh-11	M110.3
hlh-13	M110.7
hlh-2	M117.6
hlh-31	M60.7
hlh-34	M7.7
hmg-11	mab-3
hmg-6	magu-4
hmp-2	mans-4
hot-5	math-22
hot-6	math-27
hot-9	math-3
hpa-1	mcm-10
hpl-1	mcm-6
hpl-2	mdt-18
hpo-30	mec-5
hrdl-1	meg-1
hrpf-1	meg-2
hrpf-2	mel-28
hsd-2	mes-4
hsf-1	mif-1
hsp-1	mig-32
hsp-16.2	mis-12
hst-3.1	misc-1
hum-1	mlc-1
icl-1	mlt-9
idhg-1	mltn-8
ifb-2	mog-3
ifp-1	mog-4
igcm-1	moma-1
ikke-1	mpz-3
ilys-4	mpz-5
ima-3	mrpl-18
imb-2	mrpl-23
immt-1	mrpl-28
inos-1	mrpl-30
ins-14	mrpl-32
ins-21	mrpl-35
ins-25	mrpl-41
inx-11	mrpl-50
inx-6	mrpl-55
inx-7	mrps-10
irk-2	mrps-15
irld-12	mrps-17
irld-17	mrps-18C
irld-19	mrps-21
irld-21	mrps-28
irld-24	mrps-30
irld-31	mrps-7
irld-36	mrrf-1
irld-38	msp-52
irld-41	msp-74
irld-42	mup-2
irld-43	myo-5
irld-44	nape-2
irld-49	nas-11
irld-56	nas-21
irld-62	nas-33
irld-63	nas-5
irld-66	nas-6
irld-9	nas-9
islo-1	ndc-80
istr-1	nduf-7
isw-1	ned-8
itx-1	neg-1
jamp-1	nekl-2
jmjd-4	nep-13
josd-1	nep-22
K01A11.1	nepr-1
K01A2.3	nft-1
K01A2.4	nhr-137
K01A6.4	nhr-234
K01C8.2	nhr-5
K02A2.5	nhr-69
K02A6.2	nhr-85
K02B9.3	nhx-1
K02D10.4	nlp-24
K02D3.1	nlp-28
K02E10.5	nlp-29
K02E2.6	nmat-1
K02E7.11	nos-2
K02F2.5	npl-4.1
K02H11.4	npl-4.2
K03A1.4	npp-22
K03A11.5	nrde-4
K03B4.2	nspc-5
K03B4.4	nuaf-3
K04A8.2	oac-1
K04C1.2	oac-30
K04C2.3	oac-34
K04D7.6	oac-42
K04F10.2	oat-1
K04F10.7	ooc-5
K06A9.1	orc-3
K07A9.3	orc-4
K07C11.8	osm-8
K07D4.4	ostd-1
K07D4.9	par-2
K07H8.2	pat-10
K08A8.23	pck-2
K08B5.2	PDB1.1
K09C4.6	perm-3
K09E2.2	pfk-1.2
K09F6.6	pgl-2
K09H11.6	pgp-13
K10C2.2	pie-1
K10C8.4	pig-1
K10C9.1	pigv-1
K10D3.4	pitr-4
K10G6.4	pmp-2
K11B4.2	polh-1
K11E4.6	poml-3
K11G12.6	ppat-1
K11H12.9	pph-4.2
K12B6.2	ppt-1
kap-1	ppw-1
kcnl-3	pqn-21
kel-3	pqn-24
kgb-1	pqn-26
kin-6	pqn-31
kle-2	pqn-37
klp-20	pqn-67
klp-3	pqn-92
klp-7	prom-1
lact-1	prp-38
laf-1	prx-14
lag-2	prx-19
lec-12	ptr-11
lec-2	ptr-13
lem-4	ptr-19
let-60	puf-10
let-607	R01E6.2
let-70	R01H10.4
let-711	R01H2.2
lex-1	R02D5.10
lfi-1	R02D5.7
lgc-12	R02F2.5
lgc-19	R02F2.7
lgc-25	R02F2.8
lgc-35	R02F2.9
lgc-5	R03A10.5
lgc-6	R03D7.8
lgc-9	R03H10.2
lgg-1	R04D3.4
lin-17	R04F11.3
lin-31	R05A10.7
lin-38	R05D11.4
lin-39	R05G6.9
lin-40	R05H5.5
lin-49	R06B10.2
lin-5	R07B1.8
lin-65	R08A2.5
lin-7	R08B4.3
lin-8	R08C7.8
lin-9	R08D7.2
linc-106	R08E3.3
linc-11	R09A1.2
linc-136	R09B5.11
linc-22	R09E10.9
linc-58	R09H10.6
lipl-2	R102.4
lips-13	R10E8.3
lips-5	R10F2.6
lir-2	R119.1
lis-1	R11A5.6
lron-11	R11A8.7
lron-4	R11E3.19
lron-6	R11H6.6
lst-4	R12C12.7
lsy-22	R13A1.3
lurp-1	R13D7.2
M01B2.12	R13H4.8
M01E5.3	R148.7
M01H9.6	R155.3
M02D8.7	rab-11.1
M02F4.1	rad-26
M03D4.3	rad-54
M03E7.1	rad-8
M04B2.6	rap-3
M04B2.7	rft-2
M04C7.4	rgs-11
M04D8.4	rin-1
M04D8.5	riok-1
M04D8.7	rlbp-1
M04F3.4	rnh-1.3
M04F3.5	rpb-10
M05D6.10	rpb-11
M106.2	rpb-12
M110.8	rpc-2
M163.5	rpc-25
M176.10	rpoa-12
M199.2	rpom-1
M4.1	rrn-1.2
M6.4	rrn-3.56
M60.4	rtel-1
M70.4	sago-1
mab-21	sars-2
madf-1	sas-5
madf-11	scav-3
madf-2	sco-1
magu-1	scpl-4
math-33	scrm-6
math-41	sdc-2
mbl-1	sec-20
mcd-1	set-22
mcrs-1	sfxn-1.3
mdl-1	sfxn-1.4
mdt-29	sgcb-1
mdt-30	sma-6
mec-10	snb-6
mec-14	snf-10
mec-15	snf-12
mec-3	snf-4
mec-4	snf-7
mel-26	snr-1
men-1	snx-3
mes-3	soc-1
met-2	spds-1
mib-1	spe-17
mig-13	spe-27
mks-1	spe-42
mks-2	spe-44
mksr-2	spe-8
mlk-1	spi-1
mnm-2	spon-1
mrg-1	spp-15
mrp-2	srap-1
mrp-5	srp-1
mrpl-22	ssp-32
msi-1	stc-1
mtch-1	str-176
mtd-1	sucg-1
mtm-9	suox-1
mutd-1	sup-35
mys-2	sut-2
nas-10	swp-1
ndx-1	syp-2
ndx-6	syp-3
nep-16	syx-16
nex-4	T01B6.1
nfyb-1	T01B7.5
nhr-105	T01C3.9
nhr-11	T01C8.2
nhr-112	T01G5.1
nhr-117	T01H3.5
nhr-129	T02D1.8
nhr-151	T02G6.10
nhr-158	T03D8.8
nhr-163	T03F1.12
nhr-168	T04A6.3
nhr-17	T05A12.3
nhr-180	T05C12.9
nhr-182	T05D4.3
nhr-184	T05E11.7
nhr-185	T05E11.8
nhr-186	T05E8.3
nhr-187	T05G5.9
nhr-188	T05H10.4
nhr-192	T06E6.1
nhr-197	T06E6.10
nhr-2	T07C12.12
nhr-214	T07D10.3
nhr-219	T07D4.5
nhr-228	T07G12.3
nhr-237	T08G11.2
nhr-250	T08G11.4
nhr-258	T08G3.4
nhr-27	T09A5.5
nhr-275	T09B4.4
nhr-281	T09B4.6
nhr-283	T09D3.8
nhr-285	T09F5.10
nhr-30	T09F5.12
nhr-33	T10B11.5
nhr-35	T10E9.6
nhr-41	T10H9.8
nhr-42	T11F8.1
nhr-50	T11G6.11
nhr-54	T11G6.3
nhr-56	T11G6.4
nhr-6	T12A7.6
nhr-62	T12B3.2
nhr-63	T12D8.10
nhr-84	T12D8.9
nhr-87	T12G3.2
nhr-9	T13C5.2
nhr-91	T13C5.9
nhr-97	T13H5.6
nhx-4	T14A8.2
nhx-5	T14B4.5
nhx-6	T14G10.8
nhx-8	T16A9.3
nipi-3	T16G12.1
nkcc-1	T19C4.1
nlp-1	T19D12.9
nlp-10	T19H12.3
nlp-11	T20D4.7
nlp-12	T20G5.8
nlp-13	T21C12.4
nlp-18	T21C9.4
nlp-2	T21C9.6
nlp-3	T21E12.3
nlp-41	T21E12.5
nlp-46	T21F4.1
nlp-6	T22A3.6
nlp-7	T22B11.1
nlp-9	T22C1.11
nmur-2	T22C1.4
nphp-2	T22C1.5
npp-1	T23B7.2
npp-6	T23E7.2
npr-13	T23F6.2
npr-19	T23G7.2
npr-21	T25B9.12
npr-25	T25B9.2
npr-34	T25D3.4
npr-9	T25F10.1
nra-3	T25G12.3
nrde-3	T26A5.2
nsy-7	T26G10.1
ntc-1	T28A8.4
ntl-2	T28D9.3
ntl-3	T28F4.4
ntl-4	T28H10.2
num-1	taco-1
oac-40	taf-1
ocr-1	taf-7.2
ocr-3	taf-8
ocr-4	tag-131
octr-1	tag-179
odr-1	tag-209
odr-4	tag-261
odr-7	tag-267
odr-8	tag-278
oig-4	tag-280
orc-2	tag-281
osm-10	tag-321
osm-6	tag-344
otpl-2	tag-63
pad-2	tbc-2
pamn-1	tbc-6
panl-2	tep-1
pap-1	thk-1
paqr-1	thoc-2
par-3	tin-10
par-5	tni-1
parn-2	tnt-2
pat-4	tnt-4
patr-1	toc-1
paxt-1	tofu-2
pbo-6	tofu-5
pes-7	tofu-6
pha-4	trm-1
phf-10	try-7
phf-15	tsp-19
phf-32	ttll-15
phf-34	ttm-2
pho-5	ttr-18
pho-6	ttr-31
php-3	ttr-35
pitr-1	ttr-53
pmk-3	ttr-6
pnk-4	ttr-8
ppfr-2	ttr-9
ppm-1	twk-11
pps-1	twk-24
pqn-25	tyms-1
pqn-27	tyr-6
pqn-47	uba-5
pqn-51	ubc-18
pro-1	ubxn-6
prp-8	uda-1
pry-1	ugt-16
psd-1	ugt-26
pssy-1	ugt-30
pup-3	ugt-36
pxl-1	ugt-44
pyk-1	ugt-61
R01E6.7	ugt-7
R01H2.8	unc-116
R02D3.3	unc-27
R02D5.1	unc-59
R02F11.9	unc-85
R02F2.1	uri-1
R04A9.3	urm-1
R04B3.1	vab-10
R05D3.2	vacl-14
R05G6.1	vha-5
R05G9.5	vps-16
R06A10.1	vps-2
R06A4.2	vps-20
R07A4.2	W02A2.8
R07B1.11	W02B12.4
R07E5.17	W02F12.2
R08A2.7	W02H5.8
R08B4.4	W03B1.3
R08F11.7	W03D8.1
R09A8.5	W03D8.2
R09F10.3	W03F11.5
R09H10.2	W03G9.5
R102.2	W04B5.1
R102.5	W04B5.3
R10E11.5	W04H10.1
R10E11.6	W05F2.4
R10H10.4	W06A7.2
R119.5	W06D11.3
R11D1.1	W06F12.3
R11D1.12	W06G6.17
R11D1.2	W07E6.2
R11G1.1	W08E3.4
R11G10.2	W08F4.5
R11G10.3	W08F4.7
R13.9	W09C3.8
R13A5.10	W09G3.8
R13H4.9	wapl-1
R160.5	wht-4
R160.6	wht-7
R74.10	wts-1
rab-10	xol-1
rab-18	Y105C5A.8
rab-19	Y105C5B.17
rab-39	Y105E8A.13
rab-5	Y105E8A.36
rab-8	Y106G6D.6
rcn-1	Y110A2AL.9
rde-10	Y110A7A.15
rde-12	Y111B2A.1
rep-1	Y113G7B.12
repo-1	Y116A8C.27
rga-1	Y116F11B.7
rga-2	Y116F11B.8
rga-4	Y17D7B.4
rha-1	Y18D10A.8
rho-1	Y18H1A.10
rilp-1	Y18H1A.15
rle-1	Y18H1A.2
rmd-5	Y2H9A.4
rme-4	Y34B4A.5
rnf-5	Y37A1A.4
rnp-1	Y37D8A.2
rnp-6	Y37E11AL.12
rom-2	Y37E11AM.3
rpb-2	Y37E11AR.7
rrf-2	Y37E11B.7
rsd-6	Y37E3.19
rsp-1	Y38A10A.2
rsp-2	Y38F2AR.12
rsp-3	Y38H8A.2
saps-1	Y39A1A.9
sax-2	Y39B6A.13
scl-24	Y39B6A.3
scl-25	Y39B6A.37
scl-3	Y39B6A.49
scm-1	Y39D8A.1
scp-1	Y39E4B.13
scpl-1	Y39F10A.3
scrm-2	Y40C7B.4
scrm-4	Y41C4A.18
sdpn-1	Y41C4A.21
sdz-24	Y41E3.22
sdz-3	Y41G9A.5
sdz-37	Y43D4A.5
sec-10	Y43F8B.3
sec-3	Y45F3A.8
sek-1	Y45G12C.1
sel-10	Y45G5AM.7
set-13	Y46E12A.5
set-19	Y46G5A.22
set-2	Y46G5A.36
set-3	Y47D3A.32
set-4	Y47D7A.7
set-6	Y47D9A.3
sfxn-1.5	Y47D9A.5
sfxn-2	Y47G6A.13
shk-1	Y48B6A.16
shn-1	Y48B6A.5
sinh-1	Y48G1BM.6
sir-2.3	Y48G1C.5
skn-1	Y48G8AL.13
skp-1	Y49F6B.12
skr-21	Y49F6B.8
slc-17.2	Y4C6B.3
sli-1	Y50D4A.6
sls-2.4	Y50D7A.13
smg-1	Y50E8A.1
smg-2	Y51A2A.4
smg-3	Y51A2B.4
smg-8	Y51A2B.5
smp-1	Y51A2D.8
smu-1	Y51B9A.6
smu-2	Y51H4A.22
snf-1	Y51H7C.8
snfc-5	Y52B11A.10
snt-6	Y52B11A.8
snt-7	Y52E8A.2
sor-3	Y53C10A.6
spe-15	Y53F4A.2
spin-4	Y53F4B.14
spp-8	Y53F4B.26
spt-5	Y53F4B.36
sptf-1	Y53F4B.48
sra-10	Y53F4B.7
sra-11	Y53G8AL.2
sra-13	Y53G8B.2
sra-32	Y53H1A.2
sra-34	Y53H1B.2
sra-37	Y53H1C.3
sra-38	Y54E5A.5
sra-6	Y54F10BM.3
srab-10	Y54G2A.24
srab-11	Y54G2A.36
srab-18	Y54G9A.4
srb-18	Y54G9A.5
srb-19	Y55D5A.3
srb-2	Y55F3AM.14
srb-6	Y57A10A.29
srbc-19	Y57G11B.3
srbc-20	Y57G11C.14
srbc-32	Y57G11C.23
srbc-38	Y57G11C.48
srbc-60	Y57G11C.6
src-1	Y58A7A.3
srd-10	Y60A3A.21
srd-15	Y62E10A.13
srd-16	Y62F5A.10
srd-18	Y62F5A.9
srd-46	Y64H9A.2
srd-5	Y65B4A.2
srd-55	Y65B4A.7
srd-70	Y65B4A.8
sre-39	Y65B4BL.1
sre-40	Y66A7A.9
sre-48	Y66D12A.19
sre-5	Y66D12A.3
srg-20	Y66D12A.7
srg-4	Y67A10A.14
srg-47	Y67A10A.3
srg-56	Y67H2A.7
srg-62	Y69A2AR.21
srg-69	Y69A2AR.22
srg-9	Y69A2AR.23
srh-101	Y69E1A.3
srh-107	Y70G10A.3
srh-121	Y71F9AL.1
srh-125	Y71F9AR.4
srh-130	Y71F9B.9
srh-134	Y71G12B.17
srh-142	Y71G12B.3
srh-146	Y71H2B.1
srh-147	Y71H2B.2
srh-148	Y71H2B.4
srh-149	Y73B6A.3
srh-150	Y73B6BL.44
srh-154	Y73E7A.6
srh-159	Y74C9A.6
srh-16	Y75B8A.16
srh-167	Y77E11A.14
srh-168	Y7A9A.1
srh-172	Y81G3A.4
srh-173	Y82E9BL.18
srh-174	Y82E9BR.2
srh-175	ZC116.5
srh-178	ZC21.3
srh-179	ZC247.2
srh-186	ZC317.7
srh-195	ZC374.2
srh-20	ZC376.3
srh-204	ZC395.4
srh-206	ZC404.2
srh-208	ZC412.10
srh-21	ZC412.5
srh-210	ZC434.10
srh-214	ZC434.4
srh-217	ZC434.9
srh-218	ZC449.1
srh-22	ZC477.3
srh-222	ZC513.2
srh-229	ZC513.3
srh-255	zig-3
srh-263	zim-1
srh-267	zip-11
srh-271	zip-12
srh-277	zip-9
srh-279	ZK1037.6
srh-28	ZK1086.3
srh-280	ZK1098.6
srh-281	ZK1127.5
srh-30	ZK1128.4
srh-40	ZK1248.19
srh-42	ZK1251.5
srh-44	ZK1290.10
srh-68	ZK1290.7
srh-71	ZK1307.3
srh-82	ZK177.1
srh-88	ZK185.5
srh-91	ZK20.4
sri-1	ZK218.5
sri-18	ZK287.4
sri-21	ZK328.6
sri-23	ZK381.8
sri-28	ZK39.10
sri-29	ZK418.2
sri-3	ZK484.6
sri-4	ZK507.1
sri-47	ZK507.3
srj-1	ZK546.19
srm-1	ZK596.3
srm-5	ZK6.6
srm-6	ZK616.3
sro-1	ZK632.2
srr-10	ZK632.9
srr-3	ZK637.15
srr-4	ZK637.2
srsx-30	ZK666.8
srsx-32	ZK669.2
srsx-35	ZK673.6
srsx-5	ZK686.2
srsx-8	ZK686.5
srt-19	ZK688.4
srt-23	ZK688.9
srt-28	ZK795.3
srt-41	ZK809.8
srt-45	ZK822.4
srt-53	ZK836.2
srt-54	ZK856.7
srt-69	ZK856.8
srtx-1	ZK858.8
sru-1	ZK892.4
sru-2	ZK930.7
sru-22	ZK945.6
sru-26	ZK945.8
sru-37	zmp-1
srv-11	ztf-13
srv-13	ztf-16
srv-14
srv-24
srv-28
srv-36
srv-6
srv-8
srw-103
srw-17
srw-5
srw-6
srw-61
srw-68
srw-8
srw-80
srw-92
srw-93
srw-98
srx-106
srx-114
srx-120
srx-123
srx-128
srx-13
srx-135
srx-138
srx-15
srx-19
srx-3
srx-38
srx-41
srx-43
srx-67
srx-74
srxa-5
srz-12
srz-19
srz-23
srz-46
srz-5
srz-76
srz-81
srz-84
srz-94
srz-97
stdh-3
sto-3
str-116
str-169
str-198
str-227
str-243
str-254
str-264
str-3
str-48
str-49
str-78
str-96
strd-1
sulp-8
sumv-1
sumv-2
sup-1
sup-17
supr-1
sut-1
svh-2
swan-1
swsn-1
swsn-6
sym-2
syx-3
syx-7
T01B10.5
T01B11.1
T01D3.6
T01G1.5
T01G1.7
T01G6.1
T03E6.9
T03F6.7
T03F6.9
T03F7.5
T04A8.18
T04A8.7
T04C12.9
T05A8.3
T05A8.8
T05C1.2
T05C7.4
T05D4.2
T05E11.9
T05H4.3
T06G6.11
T06G6.12
T06H11.2
T07A9.10
T07A9.9
T07C12.15
T07D1.3
T07D4.2
T08D2.1
T08D2.3
T08D2.7
T08D2.8
T08E11.1
T09B9.5
T09F5.13
T10B11.2
T10B5.10
T10C6.15
T10H4.13
T10H9.1
T11A5.6
T11F9.19
T11F9.27
T12B3.1
T12B3.4
T12B3.7
T12E12.1
T13C2.7
T13G4.7
T14B4.9
T14E8.2
T14G8.4
T15B7.10
T18D3.7
T19C3.3
T19C3.4
T19D12.4
T19D2.2
T19H5.4
T20B3.1
T20B3.14
T20F5.8
T21C9.11
T21E8.4
T22E5.1
T22F3.11
T23B5.3
T23B7.3
T23D8.13
T23F11.4
T23F2.3
T24A6.7
T24C4.3
T24D5.2
T24E12.11
T24E12.12
T24E12.13
T24H10.4
T25B6.4
T25B6.5
T25D1.2
T25D1.3
T25G3.4
T26A8.4
T26C5.5
T26E3.10
T26F2.3
T26G10.5
T27E4.7
T27E7.3
T27F2.6
T27F6.10
T27F6.7
T28D9.1
T28F3.5
T28F3.9
taf-10
taf-12
taf-4
tag-147
tag-151
tag-256
tag-30
tag-89
tat-5
tba-1
tba-7
tbc-12
tbc-13
tbc-9
tbcd-1
tbh-1
teg-4
tes-1
tli-1
tln-1
tra-4
trcs-2
tre-2
trp-4
trpl-1
trpp-11
trpp-3
trpp-8
trxr-2
try-4
tsg-101
tsp-17
ttll-12
ttll-4
ttll-9
ttx-1
twk-10
twk-3
twk-46
twk-9
uaf-2
ubc-1
ubc-14
ubc-15
ubc-19
ubc-21
ubc-26
ubc-3
ubc-9
ubq-1
ugt-37
ugt-57
ugt-59
ulp-2
unc-101
unc-122
unc-37
unc-4
unc-5
unc-69
unc-94
usp-46
utx-1
vab-23
vab-7
vab-8
vang-1
VC27A7L.1
vet-2
vha-13
vha-14
vhp-1
viln-1
VM106R.1
vpr-1
vps-11
vps-15
vps-22
vps-26
vps-32.1
vps-4
vps-45
vps-52
W01A11.7
W02D9.10
W02D9.9
W02H3.3
W02H5.11
W03C9.5
W03F9.4
W03G11.4
W04A8.6
W04B5.2
W04C9.8
W04G3.5
W05B10.6
W05B5.1
W05E10.2
W05G11.4
W05H9.2
W06F12.2
W07G1.5
W07G4.2
W07G4.3
W08E3.2
W09D10.1
W09G3.1
W09G3.6
W10G11.1
wdr-23
wdr-5.1
wdr-5.2
wee-1.1
wrk-1
xbp-1
xbx-1
xbx-6
xpd-1
Y104H12D.3
Y105C5A.1
Y105C5A.1268
Y105C5A.13
Y105C5A.14
Y105E8A.20
Y105E8A.32
Y105E8B.7
Y106G6D.7
Y111B2A.12
Y111B2A.24
Y113G7A.15
Y116A8A.150
Y116F11A.3
Y116F11A.4
Y116F11A.6
Y15E3A.5
Y17D7C.2
Y17G9B.1
Y22D7AL.13
Y22D7AL.3
Y23B4A.2
Y23H5B.1
Y26E6A.2
Y32H12A.1
Y34B4A.4
Y34B4A.8
Y37D8A.17
Y37D8A.4
Y37D8A.6
Y37E11B.3
Y37E3.11
Y37E3.17
Y37H9A.3
Y38E10A.8
Y38H6A.5
Y38H6C.13
Y38H6C.8
Y39A1A.3
Y39A3CL.7
Y39B6A.43
Y39C12A.9
Y39E4B.10
Y39H10A.6
Y40B1B.8
Y41C4A.17
Y41C4A.6
Y41D4A.3
Y41E3.5
Y41G9A.6
Y42A5A.1
Y43B11AR.1
Y43C5A.7
Y43D4A.2
Y43F8A.5
Y43F8B.2
Y43F8C.11
Y43F8C.17
Y43H11AL.1
Y44A6D.1
Y44A6D.6
Y45F10D.2
Y45G5AM.3
Y45G5AM.9
Y46G5A.15
Y46G5A.18
Y46G5A.8
Y46H3A.5
Y47D3A.34
Y47G7B.2
Y48A6B.14
Y48C3A.12
Y48C3A.14
Y48E1B.2
Y48E1B.3
Y48E1C.1
Y48E1C.2
Y48E1C.4
Y48G1C.12
Y48G8AL.10
Y49A3A.3
Y49F6C.6
Y4C6B.2
Y50D4B.2
Y50D4B.6
Y50D4C.3
Y50D7A.3
Y51A2B.8
Y51B9A.10
Y51F10.11
Y51F10.12
Y51F10.3
Y51H1A.2
Y51H7BR.7
Y52B11A.19
Y52B11A.3
Y53F4B.13
Y53F4B.20
Y53F4B.21
Y53G8AL.4
Y53G8AR.9
Y54E10BR.4
Y54F10BM.1
Y54G2A.17
Y54G2A.40
Y55B1BR.2
Y55F3AM.3
Y55F3AM.5
Y55F3BR.10
Y55F3C.17
Y56A3A.2
Y56A3A.28
Y56A3A.30
Y57A10C.9
Y57G11B.6
Y57G11B.97
Y57G11C.32
Y57G11C.33
Y57G11C.36
Y57G11C.46
Y59A8B.10
Y59H11AR.6
Y5F2A.4
Y60A3A.7
Y61A9LA.1
Y61A9LA.5
Y62H9A.1
Y62H9A.9
Y66D12A.30
Y66H1A.8
Y67D2.2
Y67D8B.1
Y67D8B.2
Y67D8B.4
Y69H2.17
Y6B3B.9
Y6E2A.5
Y70C5A.2
Y70C5A.3
Y71A12B.18
Y71D11A.3
Y71G12B.23
Y71H2AM.1
Y71H2AM.9
Y71H2B.8
Y72A10A.1
Y73B3A.2
Y73B3A.3
Y73B6BL.288
Y73B6BL.35
Y73B6BL.47
Y73C8B.5
Y73C8C.10
Y73E7A.5
Y75B7AL.2
Y75B8A.14
Y75B8A.19
Y75B8A.6
Y76A2B.5
Y76B12C.8
Y77E11A.12
Y7A5A.6
Y82E9BR.1
Y82E9BR.20
Y87G2A.1
Y87G2A.2
Y92H12A.5
Y92H12BL.4
Y92H12BL.5
Y92H12BR.7
Y95B8A.8
Y97E10B.1
Y97E10C.1
Y9C9A.112
Y9C9A.13
Y9C9A.16
ymel-1
zbp-1
ZC190.5
ZC196.8
ZC21.6
ZC334.12
ZC376.6
ZC404.1
ZC443.2
ZC506.1
ZC53.1
ZC84.7
zig-4
zip-2
ZK1055.2
ZK1098.2
ZK1307.9
ZK1320.13
ZK154.4
ZK154.6
ZK218.4
ZK262.12
ZK287.3
ZK380.2
ZK418.10
ZK418.11
ZK418.3
ZK418.9
ZK470.1
ZK470.2
ZK512.11
ZK652.6
ZK652.8
ZK666.15
ZK688.11
ZK688.5
ZK697.8
ZK721.4
ZK742.6
ZK757.1
ZK809.5
ZK822.6
ZK829.12
ZK829.7
ZK856.14
ZK858.5
ZK863.1
ZK867.2
ZK938.3
ZK973.11
ZK993.5
ztf-11
ztf-3
ztf-30
ztf-9
zyg-9
