# Supplementary material for: Profiling neural editomes reveals a molecular mechanism to regulate RNA editing during development
Source: HighWire-hosted journal article supplement (doi:10.1101/gr.267575.120), 2020-12-18
Supplement: Supplemental_Table_S8.xlsx [file Supplemental_Table_S8.xlsx]

## Sheet: Edited with >5 reads in both 
Supplemental Table 8: Quantification of editing in both wild-type L1 and adult neural RNA-seq datasets (related to Fig. 4). De novo identified editing sites in wild-type L1 neural cells were compared with de novo identified editing sites in wild-type adult neural cells, which resulted in 901 sites commonly identified in both datasets with > 5 reads. Editing levels were quantified at each site usi…
Chr position	feature	wbID	Gene Name	Total # of reads in L1	Total # of variant reads in L1	% variance in L1	Total # of reads in adults	Total # of variant reads in adults	% variance in adults	WT (adults-L1)
II 13486866	three_prime_utr	WBGene00000113	alh-7	25	4	16	6	6	100	84
I 1347714	intergenic	intergenic	#N/A	12	2	16.67	5	5	100	83.33
I 630796	three_prime_utr	WBGene00022029	Y65B4A.6	11	2	18.18	6	6	100	81.82
I 630954	three_prime_utr	WBGene00022029	Y65B4A.6	15	3	20	6	6	100	80
I 630836	three_prime_utr	WBGene00022029	Y65B4A.6	14	3	21.43	5	5	100	78.57
IV 13408879	three_prime_utr	WBGene00013382	gcl-1	39	9	23.08	9	9	100	76.92
I 1071729	CDS	WBGene00001745	gsa-1	70	1	1.43	17	13	76.4706	75.0406
III 13356073	three_prime_utr	WBGene00009953	F53A2.9	8	2	25	7	7	100	75
I 630797	three_prime_utr	WBGene00022029	Y65B4A.6	11	3	27.27	5	5	100	72.73
I 1376121	three_prime_utr	WBGene00022366	Y92H12BL.5	39	5	12.82	5	4	80	67.18
I 3034193	three_prime_utr	WBGene00021841	Y54E10BR.2	9	3	33.33	5	5	100	66.67
I 2297010	three_prime_utr	WBGene00021469	Y39G10AR.11	76	16	21.05	8	7	87.5	66.45
IV 3110730	intron	WBGene00003153	mca-3	11	3	27.27	13	12	92.3077	65.0377
II 3211123	five_prime_utr	WBGene00022568	ZC239.5	13	2	15.38	5	4	80	64.62
V 4627759	three_prime_utr	WBGene00018812	sumv-2	16	3	18.75	11	9	81.8182	63.0682
I 1358771	three_prime_utr	WBGene00022363	Y92H12BL.1	19	4	21.05	6	5	83.3333	62.2833
V 2646558	three_prime_utr	WBGene00020957	W02H5.2	12	1	8.33	10	7	70	61.67
V 2646595	three_prime_utr	WBGene00020957	W02H5.2	6	1	16.67	9	7	77.7778	61.1078
IV 2713386	three_prime_utr	WBGene00022379	Y94H6A.7	15	6	40	5	5	100	60
II 13486718	three_prime_utr	WBGene00000113	alh-7	15	6	40	7	7	100	60
V 20251068	three_prime_utr	WBGene00007017	mdt-17	5	2	40	5	5	100	60
IV 13408927	three_prime_utr	WBGene00013382	gcl-1	42	5	11.9	7	5	71.4286	59.5286
II 3211159	five_prime_utr	WBGene00022568	ZC239.5	14	6	42.86	6	6	100	57.14
I 1358711	three_prime_utr	WBGene00022363	Y92H12BL.1	19	5	26.32	6	5	83.3333	57.0133
III 12671444	three_prime_utr	WBGene00006389	taf-7.2	17	4	23.53	5	4	80	56.47
I 11924734	three_prime_utr	WBGene00006958	wve-1	21	5	23.81	5	4	80	56.19
III 12623321	three_prime_utr	WBGene00013735	Y111B2A.12	20	9	45	8	8	100	55
I 3034383	three_prime_utr	WBGene00021841	Y54E10BR.2	11	5	45.45	6	6	100	54.55
I 1347145	intergenic	intergenic	#N/A	25	2	8	8	5	62.5	54.5
II 13486388	three_prime_utr	WBGene00000113	alh-7	44	12	27.27	5	4	80	52.73
V 2646476	three_prime_utr	WBGene00020957	W02H5.2	14	2	14.29	9	6	66.6667	52.3767
I 2076610	three_prime_utr	WBGene00021351	Y37E3.10	18	4	22.22	31	23	74.1935	51.9735
I 2296765	three_prime_utr	WBGene00021469	Y39G10AR.11	69	3	4.35	9	5	55.5556	51.2056
I 2721961	three_prime_utr	WBGene00022128	Y71F9B.6	34	3	8.82	5	3	60	51.18
X 1011811	exon	WBGene00023069	rncs-1	46	11	23.91	8	6	75	51.09
I 1358824	three_prime_utr	WBGene00022363	Y92H12BL.1	25	6	24	8	6	75	51
V 2646597	three_prime_utr	WBGene00020957	W02H5.2	6	3	50	5	5	100	50
III 13356063	three_prime_utr	WBGene00009953	F53A2.9	8	4	50	5	5	100	50
IV 1735152	intron	WBGene00021507	Y41D4A.5	8	4	50	6	6	100	50
I 3034180	three_prime_utr	WBGene00021841	Y54E10BR.2	10	5	50	6	6	100	50
V 3750005	three_prime_utr	WBGene00021482	Y39H10A.6	44	4	9.09	17	10	58.8235	49.7335
II 13485948	three_prime_utr	WBGene00000113	alh-7	26	2	7.69	7	4	57.1429	49.4529
II 13486047	three_prime_utr	WBGene00000113	alh-7	25	2	8	7	4	57.1429	49.1429
II 13486036	three_prime_utr	WBGene00000113	alh-7	24	2	8.33	7	4	57.1429	48.8129
III 13283036	three_prime_utr	WBGene00006798	unc-64	38	7	18.42	6	4	66.6667	48.2467
I 1359434	three_prime_utr	WBGene00022363	Y92H12BL.1	25	3	12	5	3	60	48
I 2076629	three_prime_utr	WBGene00021351	Y37E3.10	19	6	31.58	34	27	79.4118	47.8318
V 3749967	three_prime_utr	WBGene00021482	Y39H10A.6	38	9	23.68	7	5	71.4286	47.7486
I 10819682	intergenic	intergenic	#N/A	107	3	2.8	10	5	50	47.2
I 2034072	three_prime_utr	WBGene00021237	crtc-1	34	1	2.94	12	6	50	47.06
II 14066484	three_prime_utr	WBGene00002275	lem-2	15	2	13.33	5	3	60	46.67
V 4627756	three_prime_utr	WBGene00018812	sumv-2	15	8	53.33	11	11	100	46.67
III 12623331	three_prime_utr	WBGene00013735	Y111B2A.12	24	8	33.33	5	4	80	46.67
III 12171074	three_prime_utr	WBGene00013545	Y75B8A.8	20	4	20	6	4	66.6667	46.6667
V 4517339	three_prime_utr	WBGene00004947	sos-1	22	3	13.64	5	3	60	46.36
II 13486053	three_prime_utr	WBGene00000113	alh-7	25	1	4	12	6	50	46
I 3034596	three_prime_utr	WBGene00021841	Y54E10BR.2	16	1	6.25	23	12	52.1739	45.9239
I 1359411	three_prime_utr	WBGene00022363	Y92H12BL.1	21	3	14.29	5	3	60	45.71
III 13283035	three_prime_utr	WBGene00006798	unc-64	38	8	21.05	6	4	66.6667	45.6167
IV 13408857	three_prime_utr	WBGene00013382	gcl-1	31	10	32.26	9	7	77.7778	45.5178
I 3167812	three_prime_utr	WBGene00021828	Y54E10A.6	11	6	54.55	6	6	100	45.45
I 1359249	three_prime_utr	WBGene00022363	Y92H12BL.1	23	6	26.09	7	5	71.4286	45.3386
I 10819628	intergenic	intergenic	#N/A	102	2	1.96	74	35	47.2973	45.3373
III 12171075	three_prime_utr	WBGene00013545	Y75B8A.8	20	11	55	9	9	100	45
V 3750024	three_prime_utr	WBGene00021482	Y39H10A.6	45	7	15.56	15	9	60	44.44
V 4627771	three_prime_utr	WBGene00018812	sumv-2	16	6	37.5	11	9	81.8182	44.3182
III 12710717	three_prime_utr	WBGene00013742	Y111B2A.24	14	5	35.71	5	4	80	44.29
I 12749141	three_prime_utr	WBGene00006700	uba-2	17	1	5.88	6	3	50	44.12
I 10819629	intergenic	intergenic	#N/A	102	1	0.98	78	35	44.8718	43.8918
V 2646535	three_prime_utr	WBGene00020957	W02H5.2	13	6	46.15	10	9	90	43.85
V 19927833	three_prime_utr	WBGene00013362	Y60A3A.14	13	6	46.15	10	9	90	43.85
III 10405467	three_prime_utr	WBGene00044069	hat-1	16	1	6.25	8	4	50	43.75
IV 1201655	three_prime_utr	WBGene00022427	Y104H12D.3	26	6	23.08	6	4	66.6667	43.5867
III 2707199	three_prime_utr	WBGene00022173	set-27	12	2	16.67	5	3	60	43.33
I 631001	three_prime_utr	WBGene00022029	Y65B4A.6	24	4	16.67	10	6	60	43.33
I 630903	three_prime_utr	WBGene00022029	Y65B4A.6	14	8	57.14	6	6	100	42.86
V 13037250	three_prime_utr	WBGene00012337	W07G4.3	16	6	37.5	5	4	80	42.5
IV 13408861	three_prime_utr	WBGene00013382	gcl-1	32	12	37.5	10	8	80	42.5
II 3211189	five_prime_utr	WBGene00022568	ZC239.5	15	2	13.33	9	5	55.5556	42.2256
I 1359361	three_prime_utr	WBGene00022363	Y92H12BL.1	28	5	17.86	5	3	60	42.14
I 1155169	three_prime_utr	WBGene00000165	aps-3	50	4	8	16	8	50	42
V 13037090	three_prime_utr	WBGene00012337	W07G4.3	60	15	25	9	6	66.6667	41.6667
V 951022	three_prime_utr	WBGene00005024	sqv-6	11	4	36.36	9	7	77.7778	41.4178
II 13485951	three_prime_utr	WBGene00000113	alh-7	24	3	12.5	13	7	53.8462	41.3462
V 19926917	three_prime_utr	WBGene00013362	Y60A3A.14	19	6	31.58	11	8	72.7273	41.1473
V 3750013	three_prime_utr	WBGene00021482	Y39H10A.6	44	26	59.09	18	18	100	40.91
I 1347138	intergenic	intergenic	#N/A	24	4	16.67	7	4	57.1429	40.4729
V 3750123	three_prime_utr	WBGene00021482	Y39H10A.6	66	16	24.24	14	9	64.2857	40.0457
III 11557725	intergenic	intergenic	#N/A	5	3	60	7	7	100	40
II 15105965	intron	WBGene00013167	Y53F4B.21	5	3	60	6	6	100	40
I 2721962	three_prime_utr	WBGene00022128	Y71F9B.6	35	7	20	5	3	60	40
III 12671463	three_prime_utr	WBGene00006389	taf-7.2	23	4	17.39	7	4	57.1429	39.7529
II 15105931	intron	WBGene00013167	Y53F4B.21	6	2	33.33	11	8	72.7273	39.3973
I 10819307	three_prime_utr	WBGene00016458	C35E7.6	102	32	31.37	17	12	70.5882	39.2182
V 3749666	three_prime_utr	WBGene00021482	Y39H10A.6	13	2	15.38	11	6	54.5455	39.1655
V 19927414	three_prime_utr	WBGene00013362	Y60A3A.14	16	4	25	25	16	64	39
V 3749660	three_prime_utr	WBGene00021482	Y39H10A.6	14	6	42.86	11	9	81.8182	38.9582
III 13283119	three_prime_utr	WBGene00006798	unc-64	27	12	44.44	6	5	83.3333	38.8933
I 10819943	three_prime_utr	WBGene00016458	C35E7.6	119	73	61.34	38	38	100	38.66
X 1011749	exon	WBGene00023069	rncs-1	44	5	11.36	6	3	50	38.64
V 3749659	three_prime_utr	WBGene00021482	Y39H10A.6	13	8	61.54	13	13	100	38.46
I 11924723	three_prime_utr	WBGene00006958	wve-1	24	6	25	8	5	62.5	37.5
V 4627770	three_prime_utr	WBGene00018812	sumv-2	16	10	62.5	11	11	100	37.5
I 630774	three_prime_utr	WBGene00022029	Y65B4A.6	8	5	62.5	6	6	100	37.5
V 13037212	three_prime_utr	WBGene00012337	W07G4.3	17	5	29.41	6	4	66.6667	37.2567
IV 13408514	three_prime_utr	WBGene00013382	gcl-1	32	1	3.12	5	2	40	36.88
I 2296739	three_prime_utr	WBGene00021469	Y39G10AR.11	86	19	22.09	17	10	58.8235	36.7335
I 2296746	three_prime_utr	WBGene00021469	Y39G10AR.11	81	26	32.1	16	11	68.75	36.65
V 2646727	three_prime_utr	WBGene00020957	W02H5.2	11	7	63.64	6	6	100	36.36
I 3167804	three_prime_utr	WBGene00021828	Y54E10A.6	11	7	63.64	5	5	100	36.36
I 3167612	three_prime_utr	WBGene00021828	Y54E10A.6	11	7	63.64	10	10	100	36.36
IV 9992056	CDS	WBGene00006699	uba-1	66	1	1.52	8	3	37.5	35.98
I 2296726	three_prime_utr	WBGene00021469	Y39G10AR.11	89	7	7.87	16	7	43.75	35.88
II 14065926	three_prime_utr	WBGene00002275	lem-2	24	1	4.17	5	2	40	35.83
I 1154858	three_prime_utr	WBGene00000165	aps-3	32	3	9.38	9	4	44.4444	35.0644
I 10819385	three_prime_utr	WBGene00016458	C35E7.6	85	16	18.82	39	21	53.8462	35.0262
I 10820090	three_prime_utr	WBGene00016458	C35E7.6	40	2	5	10	4	40	35
I 2076463	three_prime_utr	WBGene00021351	Y37E3.10	20	1	5	20	8	40	35
V 13037084	three_prime_utr	WBGene00012337	W07G4.3	60	7	11.67	15	7	46.6667	34.9967
I 1359386	three_prime_utr	WBGene00022363	Y92H12BL.1	29	6	20.69	9	5	55.5556	34.8656
IV 13408850	three_prime_utr	WBGene00013382	gcl-1	31	3	9.68	9	4	44.4444	34.7644
V 4627751	three_prime_utr	WBGene00018812	sumv-2	15	3	20	11	6	54.5455	34.5455
I 10820261	three_prime_utr	WBGene00016458	C35E7.6	84	24	28.57	27	17	62.963	34.393
I 10820313	three_prime_utr	WBGene00016458	C35E7.6	89	46	51.69	7	6	85.7143	34.0243
I 10820093	three_prime_utr	WBGene00016458	C35E7.6	42	4	9.52	23	10	43.4783	33.9583
I 1347101	intergenic	intergenic	#N/A	17	4	23.53	7	4	57.1429	33.6129
IV 13408928	three_prime_utr	WBGene00013382	gcl-1	42	4	9.52	7	3	42.8571	33.3371
V 13037227	three_prime_utr	WBGene00012337	W07G4.3	15	5	33.33	6	4	66.6667	33.3367
I 2722409	three_prime_utr	WBGene00022128	Y71F9B.6	24	8	33.33	6	4	66.6667	33.3367
V 2646612	three_prime_utr	WBGene00020957	W02H5.2	6	4	66.67	8	8	100	33.33
II 13485950	three_prime_utr	WBGene00000113	alh-7	24	7	29.17	8	5	62.5	33.33
V 65081	three_prime_utr	WBGene00018976	daam-1	12	8	66.67	5	5	100	33.33
I 10819299	three_prime_utr	WBGene00016458	C35E7.6	107	18	16.82	12	6	50	33.18
V 3749956	three_prime_utr	WBGene00021482	Y39H10A.6	34	16	47.06	5	4	80	32.94
I 2296779	three_prime_utr	WBGene00021469	Y39G10AR.11	64	11	17.19	12	6	50	32.81
I 3034169	three_prime_utr	WBGene00021841	Y54E10BR.2	11	3	27.27	5	3	60	32.73
I 10820251	three_prime_utr	WBGene00016458	C35E7.6	94	37	39.36	32	23	71.875	32.515
I 11924697	three_prime_utr	WBGene00006958	wve-1	26	2	7.69	10	4	40	32.31
I 10820476	three_prime_utr	WBGene00016458	C35E7.6	97	56	57.73	50	45	90	32.27
I 1359258	three_prime_utr	WBGene00022363	Y92H12BL.1	28	16	57.14	9	8	88.8889	31.7489
I 10820008	three_prime_utr	WBGene00016458	C35E7.6	66	28	42.42	58	43	74.1379	31.7179
I 10820486	three_prime_utr	WBGene00016458	C35E7.6	102	50	49.02	57	46	80.7018	31.6818
II 3922354	three_prime_utr	WBGene00018756	F53C3.13	24	2	8.33	5	2	40	31.67
I 1154810	three_prime_utr	WBGene00000165	aps-3	48	4	8.33	5	2	40	31.67
V 3750058	three_prime_utr	WBGene00021482	Y39H10A.6	52	11	21.15	19	10	52.6316	31.4816
V 20251053	three_prime_utr	WBGene00007017	mdt-17	5	2	40	7	5	71.4286	31.4286
I 2296727	three_prime_utr	WBGene00021469	Y39G10AR.11	89	35	39.33	17	12	70.5882	31.2582
III 12623258	three_prime_utr	WBGene00013735	Y111B2A.12	16	11	68.75	6	6	100	31.25
III 12623309	three_prime_utr	WBGene00013735	Y111B2A.12	21	4	19.05	8	4	50	30.95
II 14347038	three_prime_utr	WBGene00002996	lin-7	34	16	47.06	9	7	77.7778	30.7178
I 11924724	three_prime_utr	WBGene00006958	wve-1	24	3	12.5	7	3	42.8571	30.3571
I 2296917	three_prime_utr	WBGene00021469	Y39G10AR.11	64	19	29.69	5	3	60	30.31
V 12290025	CDS	WBGene00010097	srpa-68	64	2	3.12	6	2	33.3333	30.2133
I 10819332	three_prime_utr	WBGene00016458	C35E7.6	93	13	13.98	34	15	44.1176	30.1376
I 630963	three_prime_utr	WBGene00022029	Y65B4A.6	20	9	45	12	9	75	30
I 1154735	three_prime_utr	WBGene00000165	aps-3	57	2	3.51	6	2	33.3333	29.8233
I 10820475	three_prime_utr	WBGene00016458	C35E7.6	99	32	32.32	50	31	62	29.68
I 10819353	three_prime_utr	WBGene00016458	C35E7.6	98	20	20.41	30	15	50	29.59
I 2296759	three_prime_utr	WBGene00021469	Y39G10AR.11	74	11	14.86	9	4	44.4444	29.5844
V 4627808	three_prime_utr	WBGene00018812	sumv-2	11	5	45.45	8	6	75	29.55
I 10819417	three_prime_utr	WBGene00016458	C35E7.6	93	26	27.96	47	27	57.4468	29.4868
V 3750001	three_prime_utr	WBGene00021482	Y39H10A.6	45	5	11.11	5	2	40	28.89
I 630446	three_prime_utr	WBGene00022029	Y65B4A.6	37	1	2.7	19	6	31.5789	28.8789
I 2076668	three_prime_utr	WBGene00021351	Y37E3.10	20	5	25	43	23	53.4884	28.4884
I 11924699	three_prime_utr	WBGene00006958	wve-1	26	3	11.54	10	4	40	28.46
V 19927323	three_prime_utr	WBGene00013362	Y60A3A.14	11	4	36.36	17	11	64.7059	28.3459
I 10819300	three_prime_utr	WBGene00016458	C35E7.6	107	11	10.28	13	5	38.4615	28.1815
V 2646512	three_prime_utr	WBGene00020957	W02H5.2	14	5	35.71	11	7	63.6364	27.9264
I 10820264	three_prime_utr	WBGene00016458	C35E7.6	83	12	14.46	26	11	42.3077	27.8477
V 3749622	three_prime_utr	WBGene00021482	Y39H10A.6	34	1	2.94	13	4	30.7692	27.8292
I 10820364	three_prime_utr	WBGene00016458	C35E7.6	90	11	12.22	15	6	40	27.78
III 13356048	three_prime_utr	WBGene00009953	F53A2.9	9	2	22.22	6	3	50	27.78
I 2076609	three_prime_utr	WBGene00021351	Y37E3.10	18	4	22.22	28	14	50	27.78
I 1358501	three_prime_utr	WBGene00022363	Y92H12BL.1	18	13	72.22	6	6	100	27.78
I 10819273	three_prime_utr	WBGene00016458	C35E7.6	109	9	8.26	25	9	36	27.74
I 10820036	three_prime_utr	WBGene00016458	C35E7.6	48	21	43.75	42	30	71.4286	27.6786
V 3749665	three_prime_utr	WBGene00021482	Y39H10A.6	13	2	15.38	7	3	42.8571	27.4771
I 2076405	three_prime_utr	WBGene00021351	Y37E3.10	38	10	26.32	54	29	53.7037	27.3837
I 2296735	three_prime_utr	WBGene00021469	Y39G10AR.11	87	11	12.64	10	4	40	27.36
I 631009	three_prime_utr	WBGene00022029	Y65B4A.6	27	3	11.11	13	5	38.4615	27.3515
II 13485946	three_prime_utr	WBGene00000113	alh-7	28	1	3.57	13	4	30.7692	27.1992
V 3749569	three_prime_utr	WBGene00021482	Y39H10A.6	54	5	9.26	11	4	36.3636	27.1036
I 10819940	three_prime_utr	WBGene00016458	C35E7.6	122	28	22.95	34	17	50	27.05
V 13037113	three_prime_utr	WBGene00012337	W07G4.3	52	38	73.08	9	9	100	26.92
I 630469	three_prime_utr	WBGene00022029	Y65B4A.6	29	9	31.03	19	11	57.8947	26.8647
I 10820275	three_prime_utr	WBGene00016458	C35E7.6	91	6	6.59	6	2	33.3333	26.7433
IV 13408919	three_prime_utr	WBGene00013382	gcl-1	43	7	16.28	7	3	42.8571	26.5771
I 10819354	three_prime_utr	WBGene00016458	C35E7.6	98	20	20.41	32	15	46.875	26.465
I 2033893	three_prime_utr	WBGene00021237	crtc-1	53	2	3.77	30	9	30	26.23
V 10182955	three_prime_utr	WBGene00000840	cul-5	43	6	13.95	20	8	40	26.05
I 2296927	three_prime_utr	WBGene00021469	Y39G10AR.11	68	5	7.35	6	2	33.3333	25.9833
I 2076735	three_prime_utr	WBGene00021351	Y37E3.10	35	13	37.14	65	41	63.0769	25.9369
I 10820385	three_prime_utr	WBGene00016458	C35E7.6	94	5	5.32	16	5	31.25	25.93
I 10820387	three_prime_utr	WBGene00016458	C35E7.6	91	7	7.69	18	6	33.3333	25.6433
II 13486675	three_prime_utr	WBGene00000113	alh-7	21	14	66.67	13	12	92.3077	25.6377
I 10820169	three_prime_utr	WBGene00016458	C35E7.6	89	11	12.36	37	14	37.8378	25.4778
V 19926805	three_prime_utr	WBGene00013362	Y60A3A.14	15	3	20	11	5	45.4545	25.4545
I 1358787	three_prime_utr	WBGene00022363	Y92H12BL.1	22	12	54.55	5	4	80	25.45
I 10819293	three_prime_utr	WBGene00016458	C35E7.6	104	13	12.5	29	11	37.931	25.431
I 10820262	three_prime_utr	WBGene00016458	C35E7.6	84	4	4.76	10	3	30	25.24
I 1154823	three_prime_utr	WBGene00000165	aps-3	40	25	62.5	24	21	87.5	25
I 3167602	three_prime_utr	WBGene00021828	Y54E10A.6	12	9	75	8	8	100	25
I 1154650	three_prime_utr	WBGene00000165	aps-3	57	32	56.14	53	43	81.1321	24.9921
IV 13408852	three_prime_utr	WBGene00013382	gcl-1	31	13	41.94	9	6	66.6667	24.7267
V 3749555	three_prime_utr	WBGene00021482	Y39H10A.6	50	21	42	12	8	66.6667	24.6667
V 2646527	three_prime_utr	WBGene00020957	W02H5.2	13	2	15.38	10	4	40	24.62
II 3211179	five_prime_utr	WBGene00022568	ZC239.5	13	2	15.38	5	2	40	24.62
I 10819488	three_prime_utr	WBGene00016458	C35E7.6	111	12	10.81	17	6	35.2941	24.4841
V 3750019	three_prime_utr	WBGene00021482	Y39H10A.6	44	1	2.27	15	4	26.6667	24.3967
I 10820413	three_prime_utr	WBGene00016458	C35E7.6	93	12	12.9	43	16	37.2093	24.3093
I 10819365	three_prime_utr	WBGene00016458	C35E7.6	100	7	7	32	10	31.25	24.25
I 2296688	three_prime_utr	WBGene00021469	Y39G10AR.11	97	25	25.77	8	4	50	24.23
I 10820252	three_prime_utr	WBGene00016458	C35E7.6	94	18	19.15	30	13	43.3333	24.1833
II 14347028	three_prime_utr	WBGene00002996	lin-7	30	19	63.33	8	7	87.5	24.17
I 1347071	intergenic	intergenic	#N/A	16	3	18.75	7	3	42.8571	24.1071
I 1154865	three_prime_utr	WBGene00000165	aps-3	32	4	12.5	11	4	36.3636	23.8636
I 630442	three_prime_utr	WBGene00022029	Y65B4A.6	39	20	51.28	24	18	75	23.72
I 2033888	three_prime_utr	WBGene00021237	crtc-1	56	20	35.71	32	19	59.375	23.665
I 10820274	three_prime_utr	WBGene00016458	C35E7.6	92	9	9.78	6	2	33.3333	23.5533
I 10820009	three_prime_utr	WBGene00016458	C35E7.6	64	39	60.94	58	49	84.4828	23.5428
I 10819312	intergenic	intergenic	#N/A	101	6	5.94	17	5	29.4118	23.4718
I 10819627	intergenic	intergenic	#N/A	101	1	0.99	74	18	24.3243	23.3343
I 1155091	three_prime_utr	WBGene00000165	aps-3	50	5	10	30	10	33.3333	23.3333
V 950772	three_prime_utr	WBGene00005024	sqv-6	18	3	16.67	5	2	40	23.33
I 10820616	intergenic	intergenic	#N/A	155	22	14.19	16	6	37.5	23.31
I 1358526	three_prime_utr	WBGene00022363	Y92H12BL.1	19	7	36.84	5	3	60	23.16
V 2646531	three_prime_utr	WBGene00020957	W02H5.2	13	10	76.92	10	10	100	23.08
V 2646532	three_prime_utr	WBGene00020957	W02H5.2	13	10	76.92	10	10	100	23.08
II 13485922	three_prime_utr	WBGene00000113	alh-7	25	13	52	12	9	75	23
I 10819463	three_prime_utr	WBGene00016458	C35E7.6	99	67	67.68	53	48	90.566	22.886
II 13486723	three_prime_utr	WBGene00000113	alh-7	15	3	20	7	3	42.8571	22.8571
I 10820182	three_prime_utr	WBGene00016458	C35E7.6	88	24	27.27	44	22	50	22.73
I 3034147	three_prime_utr	WBGene00021841	Y54E10BR.2	11	3	27.27	6	3	50	22.73
I 3034166	three_prime_utr	WBGene00021841	Y54E10BR.2	11	3	27.27	6	3	50	22.73
II 13485924	three_prime_utr	WBGene00000113	alh-7	25	16	64	15	13	86.6667	22.6667
I 3033927	three_prime_utr	WBGene00021841	Y54E10BR.2	16	6	37.5	5	3	60	22.5
I 1347228	intergenic	intergenic	#N/A	43	19	44.19	9	6	66.6667	22.4767
I 10820257	three_prime_utr	WBGene00016458	C35E7.6	89	5	5.62	25	7	28	22.38
I 629843	three_prime_utr	WBGene00022029	Y65B4A.6	32	2	6.25	14	4	28.5714	22.3214
I 10819279	three_prime_utr	WBGene00016458	C35E7.6	105	36	34.29	23	13	56.5217	22.2317
I 630997	three_prime_utr	WBGene00022029	Y65B4A.6	24	8	33.33	9	5	55.5556	22.2256
I 1347683	intergenic	intergenic	#N/A	27	21	77.78	5	5	100	22.22
I 10820344	three_prime_utr	WBGene00016458	C35E7.6	93	6	6.45	7	2	28.5714	22.1214
I 1155168	three_prime_utr	WBGene00000165	aps-3	52	12	23.08	31	14	45.1613	22.0813
I 2033881	three_prime_utr	WBGene00021237	crtc-1	61	7	11.48	24	8	33.3333	21.8533
I 10819249	three_prime_utr	WBGene00016458	C35E7.6	106	83	78.3	30	30	100	21.7
V 3750108	three_prime_utr	WBGene00021482	Y39H10A.6	63	19	30.16	27	14	51.8519	21.6919
X 1011635	exon	WBGene00023069	rncs-1	60	23	38.33	5	3	60	21.67
I 3034567	three_prime_utr	WBGene00021841	Y54E10BR.2	15	11	73.33	20	19	95	21.67
I 10820050	three_prime_utr	WBGene00016458	C35E7.6	39	5	12.82	32	11	34.375	21.555
I 1347259	intergenic	intergenic	#N/A	49	14	28.57	10	5	50	21.43
IV 13408513	three_prime_utr	WBGene00013382	gcl-1	32	16	50	7	5	71.4286	21.4286
IV 3110688	intron	WBGene00003153	mca-3	10	5	50	14	10	71.4286	21.4286
I 10819309	three_prime_utr	WBGene00016458	C35E7.6	102	19	18.63	15	6	40	21.37
I 2076702	three_prime_utr	WBGene00021351	Y37E3.10	28	9	32.14	43	23	53.4884	21.3484
I 10819198	three_prime_utr	WBGene00016458	C35E7.6	98	19	19.39	32	13	40.625	21.235
I 3034605	three_prime_utr	WBGene00021841	Y54E10BR.2	16	5	31.25	21	11	52.381	21.131
I 1155097	three_prime_utr	WBGene00000165	aps-3	53	18	33.96	40	22	55	21.04
II 5725309	intergenic	intergenic	#N/A	200	1	0.5	14	3	21.4286	20.9286
I 1359410	three_prime_utr	WBGene00022363	Y92H12BL.1	21	15	71.43	13	12	92.3077	20.8777
I 10819485	three_prime_utr	WBGene00016458	C35E7.6	109	16	14.68	45	16	35.5556	20.8756
V 950675	three_prime_utr	WBGene00005024	sqv-6	16	2	12.5	6	2	33.3333	20.8333
III 10405655	three_prime_utr	WBGene00044069	hat-1	12	2	16.67	8	3	37.5	20.83
I 2296758	three_prime_utr	WBGene00021469	Y39G10AR.11	74	29	39.19	15	9	60	20.81
I 10819640	intergenic	intergenic	#N/A	103	1	0.97	51	11	21.5686	20.5986
I 631011	three_prime_utr	WBGene00022029	Y65B4A.6	27	13	48.15	19	13	68.4211	20.2711
I 630458	three_prime_utr	WBGene00022029	Y65B4A.6	32	6	18.75	18	7	38.8889	20.1389
V 3750124	three_prime_utr	WBGene00021482	Y39H10A.6	67	26	38.81	17	10	58.8235	20.0135
I 3034568	three_prime_utr	WBGene00021841	Y54E10BR.2	15	11	73.33	15	14	93.3333	20.0033
V 13037223	three_prime_utr	WBGene00012337	W07G4.3	15	12	80	6	6	100	20
I 1154822	three_prime_utr	WBGene00000165	aps-3	40	22	55	24	18	75	20
I 1358514	three_prime_utr	WBGene00022363	Y92H12BL.1	20	12	60	5	4	80	20
I 10819464	three_prime_utr	WBGene00016458	C35E7.6	99	5	5.05	44	11	25	19.95
I 10820412	three_prime_utr	WBGene00016458	C35E7.6	94	25	26.6	43	20	46.5116	19.9116
V 13037089	three_prime_utr	WBGene00012337	W07G4.3	60	25	41.67	13	8	61.5385	19.8685
V 13037098	three_prime_utr	WBGene00012337	W07G4.3	59	6	10.17	10	3	30	19.83
I 630457	three_prime_utr	WBGene00022029	Y65B4A.6	32	23	71.88	24	22	91.6667	19.7867
X 1012033	exon	WBGene00023069	rncs-1	56	12	21.43	17	7	41.1765	19.7465
I 1155109	three_prime_utr	WBGene00000165	aps-3	57	20	35.09	42	23	54.7619	19.6719
I 10819681	intergenic	intergenic	#N/A	108	7	6.48	23	6	26.087	19.607
II 13485923	three_prime_utr	WBGene00000113	alh-7	25	17	68	16	14	87.5	19.5
I 2296771	three_prime_utr	WBGene00021469	Y39G10AR.11	65	9	13.85	15	5	33.3333	19.4833
I 3034557	three_prime_utr	WBGene00021841	Y54E10BR.2	14	10	71.43	11	10	90.9091	19.4791
I 10820086	three_prime_utr	WBGene00016458	C35E7.6	36	17	47.22	18	12	66.6667	19.4467
I 10820378	three_prime_utr	WBGene00016458	C35E7.6	91	14	15.38	23	8	34.7826	19.4026
I 10820499	three_prime_utr	WBGene00016458	C35E7.6	105	22	20.95	57	23	40.3509	19.4009
I 10820314	three_prime_utr	WBGene00016458	C35E7.6	88	60	68.18	8	7	87.5	19.32
I 10819698	three_prime_utr	WBGene00016458	C35E7.6	107	34	31.78	49	25	51.0204	19.2404
II 3211202	five_prime_utr	WBGene00022568	ZC239.5	21	5	23.81	7	3	42.8571	19.0471
II 14347010	three_prime_utr	WBGene00002996	lin-7	28	4	14.29	6	2	33.3333	19.0433
II 3211160	five_prime_utr	WBGene00022568	ZC239.5	14	2	14.29	6	2	33.3333	19.0433
I 10819498	three_prime_utr	WBGene00016458	C35E7.6	113	4	3.54	31	7	22.5806	19.0406
I 10820016	three_prime_utr	WBGene00016458	C35E7.6	65	7	10.77	47	14	29.7872	19.0172
I 10819331	intergenic	intergenic	#N/A	94	9	9.57	7	2	28.5714	19.0014
I 10820455	three_prime_utr	WBGene00016458	C35E7.6	97	4	4.12	48	11	22.9167	18.7967
V 6395948	CDS	WBGene00001581	gfi-1	76	1	1.32	10	2	20	18.68
I 1359227	three_prime_utr	WBGene00022363	Y92H12BL.1	17	11	64.71	6	5	83.3333	18.6233
I 1359371	three_prime_utr	WBGene00022363	Y92H12BL.1	28	6	21.43	5	2	40	18.57
X 1011815	exon	WBGene00023069	rncs-1	47	7	14.89	9	3	33.3333	18.4433
I 1155131	three_prime_utr	WBGene00000165	aps-3	62	11	17.74	47	17	36.1702	18.4302
I 10819473	three_prime_utr	WBGene00016458	C35E7.6	106	36	33.96	42	22	52.381	18.421
I 2076368	three_prime_utr	WBGene00021351	Y37E3.10	46	5	10.87	65	19	29.2308	18.3608
I 2076457	three_prime_utr	WBGene00021351	Y37E3.10	20	3	15	15	5	33.3333	18.3333
II 5725312	intergenic	intergenic	#N/A	202	1	0.5	16	3	18.75	18.25
I 1155328	three_prime_utr	WBGene00000165	aps-3	50	2	4	27	6	22.2222	18.2222
III 12623337	three_prime_utr	WBGene00013735	Y111B2A.12	22	18	81.82	8	8	100	18.18
III 12671462	three_prime_utr	WBGene00006389	taf-7.2	23	9	39.13	7	4	57.1429	18.0129
I 10819484	three_prime_utr	WBGene00016458	C35E7.6	108	69	63.89	44	36	81.8182	17.9282
I 10819366	three_prime_utr	WBGene00016458	C35E7.6	99	8	8.08	31	8	25.8065	17.7265
I 10819728	three_prime_utr	WBGene00016458	C35E7.6	112	16	14.29	50	16	32	17.71
I 10819308	three_prime_utr	WBGene00016458	C35E7.6	102	12	11.76	17	5	29.4118	17.6518
I 1347095	intergenic	intergenic	#N/A	17	14	82.35	11	11	100	17.65
I 10820428	three_prime_utr	WBGene00016458	C35E7.6	92	42	45.65	49	31	63.2653	17.6153
I 10820035	three_prime_utr	WBGene00016458	C35E7.6	48	11	22.92	42	17	40.4762	17.5562
I 630438	three_prime_utr	WBGene00022029	Y65B4A.6	39	4	10.26	18	5	27.7778	17.5178
V 20251272	three_prime_utr	WBGene00007017	mdt-17	8	5	62.5	5	4	80	17.5
V 13135059	three_prime_utr	WBGene00007153	clec-41	15	3	20	8	3	37.5	17.5
X 1011762	exon	WBGene00023069	rncs-1	43	14	32.56	6	3	50	17.44
I 10820418	three_prime_utr	WBGene00016458	C35E7.6	90	59	65.56	47	39	82.9787	17.4187
I 10820192	three_prime_utr	WBGene00016458	C35E7.6	87	17	19.54	57	21	36.8421	17.3021
I 10820377	three_prime_utr	WBGene00016458	C35E7.6	90	8	8.89	23	6	26.087	17.197
I 2076654	three_prime_utr	WBGene00021351	Y37E3.10	21	6	28.57	35	16	45.7143	17.1443
II 13486716	three_prime_utr	WBGene00000113	alh-7	15	6	40	7	4	57.1429	17.1429
I 2033866	three_prime_utr	WBGene00021237	crtc-1	70	2	2.86	25	5	20	17.14
I 10820478	three_prime_utr	WBGene00016458	C35E7.6	101	8	7.92	56	14	25	17.08
I 10819232	three_prime_utr	WBGene00016458	C35E7.6	107	12	11.21	39	11	28.2051	16.9951
I 630455	three_prime_utr	WBGene00022029	Y65B4A.6	33	1	3.03	20	4	20	16.97
I 2076640	three_prime_utr	WBGene00021351	Y37E3.10	20	16	80	33	32	96.9697	16.9697
I 2076633	three_prime_utr	WBGene00021351	Y37E3.10	19	1	5.26	27	6	22.2222	16.9622
I 10820209	three_prime_utr	WBGene00016458	C35E7.6	98	8	8.16	48	12	25	16.84
I 1154603	three_prime_utr	WBGene00000165	aps-3	42	16	38.1	51	28	54.902	16.802
I 10820128	three_prime_utr	WBGene00016458	C35E7.6	68	5	7.35	29	7	24.1379	16.7879
I 10819287	three_prime_utr	WBGene00016458	C35E7.6	100	45	45	34	21	61.7647	16.7647
I 1154645	three_prime_utr	WBGene00000165	aps-3	56	38	67.86	52	44	84.6154	16.7554
I 10820333	three_prime_utr	WBGene00016458	C35E7.6	97	8	8.25	8	2	25	16.75
I 1155142	three_prime_utr	WBGene00000165	aps-3	64	5	7.81	53	13	24.5283	16.7183
I 2034042	three_prime_utr	WBGene00021237	crtc-1	30	25	83.33	9	9	100	16.67
V 951011	three_prime_utr	WBGene00005024	sqv-6	12	4	33.33	6	3	50	16.67
V 2646554	three_prime_utr	WBGene00020957	W02H5.2	12	4	33.33	6	3	50	16.67
I 2296703	three_prime_utr	WBGene00021469	Y39G10AR.11	96	68	70.83	16	14	87.5	16.67
I 3167860	three_prime_utr	WBGene00021828	Y54E10A.6	6	5	83.33	8	8	100	16.67
V 8924041	three_prime_utr	WBGene00019204	H14N18.4	10	5	50	6	4	66.6667	16.6667
I 2722342	three_prime_utr	WBGene00022128	Y71F9B.6	18	9	50	6	4	66.6667	16.6667
I 2076697	three_prime_utr	WBGene00021351	Y37E3.10	28	6	21.43	42	16	38.0952	16.6652
I 1358502	three_prime_utr	WBGene00022363	Y92H12BL.1	18	12	66.67	6	5	83.3333	16.6633
II 13487402	three_prime_utr	WBGene00000113	alh-7	36	6	16.67	12	4	33.3333	16.6633
I 10819963	three_prime_utr	WBGene00016458	C35E7.6	103	5	4.85	28	6	21.4286	16.5786
V 13135914	three_prime_utr	WBGene00007153	clec-41	26	5	19.23	14	5	35.7143	16.4843
V 4628309	three_prime_utr	WBGene00018812	sumv-2	34	8	23.53	5	2	40	16.47
X 1011822	exon	WBGene00023069	rncs-1	47	10	21.28	8	3	37.5	16.22
I 10820152	three_prime_utr	WBGene00016458	C35E7.6	74	10	13.51	37	11	29.7297	16.2197
I 10820312	three_prime_utr	WBGene00016458	C35E7.6	90	24	26.67	7	3	42.8571	16.1871
I 10819941	three_prime_utr	WBGene00016458	C35E7.6	121	25	20.66	38	14	36.8421	16.1821
II 5725502	intron	WBGene00004267	rab-3	114	7	6.14	9	2	22.2222	16.0822
IV 1201518	three_prime_utr	WBGene00022427	Y104H12D.3	56	5	8.93	8	2	25	16.07
I 10819281	three_prime_utr	WBGene00016458	C35E7.6	103	12	11.65	29	8	27.5862	15.9362
I 2296770	three_prime_utr	WBGene00021469	Y39G10AR.11	66	6	9.09	8	2	25	15.91
I 2296730	three_prime_utr	WBGene00021469	Y39G10AR.11	88	8	9.09	16	4	25	15.91
I 629842	three_prime_utr	WBGene00022029	Y65B4A.6	32	11	34.38	14	7	50	15.62
I 10820094	three_prime_utr	WBGene00016458	C35E7.6	45	3	6.67	9	2	22.2222	15.5522
I 1154674	three_prime_utr	WBGene00000165	aps-3	56	10	17.86	45	15	33.3333	15.4733
V 6172875	CDS	WBGene00006436	ttn-1	5	2	40	47	26	55.3191	15.3191
I 2076412	three_prime_utr	WBGene00021351	Y37E3.10	36	5	13.89	48	14	29.1667	15.2767
V 3750085	three_prime_utr	WBGene00021482	Y39H10A.6	57	4	7.02	18	4	22.2222	15.2022
I 10820210	three_prime_utr	WBGene00016458	C35E7.6	98	7	7.14	27	6	22.2222	15.0822
I 10819506	three_prime_utr	WBGene00016458	C35E7.6	108	15	13.89	38	11	28.9474	15.0574
I 10820113	three_prime_utr	WBGene00016458	C35E7.6	59	8	13.56	28	8	28.5714	15.0114
I 10820368	three_prime_utr	WBGene00016458	C35E7.6	90	9	10	8	2	25	15
V 13037088	three_prime_utr	WBGene00012337	W07G4.3	60	6	10	12	3	25	15
I 1154660	three_prime_utr	WBGene00000165	aps-3	58	12	20.69	59	21	35.5932	14.9032
V 3750060	three_prime_utr	WBGene00021482	Y39H10A.6	53	12	22.64	16	6	37.5	14.86
IV 13408853	three_prime_utr	WBGene00013382	gcl-1	31	14	45.16	10	6	60	14.84
I 10819277	intergenic	intergenic	#N/A	107	8	7.48	9	2	22.2222	14.7422
V 3750147	three_prime_utr	WBGene00021482	Y39H10A.6	78	5	6.41	19	4	21.0526	14.6426
X 1012032	exon	WBGene00023069	rncs-1	57	4	7.02	14	3	21.4286	14.4086
I 7428780	intron	WBGene00006752	unc-13	7	6	85.71	5	5	100	14.29
V 13135078	three_prime_utr	WBGene00007153	clec-41	14	12	85.71	5	5	100	14.29
I 10820208	three_prime_utr	WBGene00016458	C35E7.6	98	35	35.71	48	24	50	14.29
V 4628318	three_prime_utr	WBGene00018812	sumv-2	35	9	25.71	5	2	40	14.29
V 2646508	three_prime_utr	WBGene00020957	W02H5.2	14	5	35.71	12	6	50	14.29
I 3167829	three_prime_utr	WBGene00021828	Y54E10A.6	11	7	63.64	9	7	77.7778	14.1378
I 10820144	three_prime_utr	WBGene00016458	C35E7.6	69	3	4.35	38	7	18.4211	14.0711
I 10819912	three_prime_utr	WBGene00016458	C35E7.6	135	15	11.11	24	6	25	13.89
I 2076726	three_prime_utr	WBGene00021351	Y37E3.10	36	1	2.78	54	9	16.6667	13.8867
I 10819244	three_prime_utr	WBGene00016458	C35E7.6	108	1	0.93	27	4	14.8148	13.8848
II 13486035	three_prime_utr	WBGene00000113	alh-7	25	8	32	24	11	45.8333	13.8333
I 1155115	three_prime_utr	WBGene00000165	aps-3	58	2	3.45	29	5	17.2414	13.7914
V 4628304	three_prime_utr	WBGene00018812	sumv-2	33	12	36.36	6	3	50	13.64
I 3167560	three_prime_utr	WBGene00021828	Y54E10A.6	14	9	64.29	9	7	77.7778	13.4878
V 19927427	three_prime_utr	WBGene00013362	Y60A3A.14	15	3	20	12	4	33.3333	13.3333
X 1011804	exon	WBGene00023069	rncs-1	44	13	29.55	7	3	42.8571	13.3071
I 1154873	three_prime_utr	WBGene00000165	aps-3	33	8	24.24	8	3	37.5	13.26
I 10819550	three_prime_utr	WBGene00016458	C35E7.6	109	9	8.26	56	12	21.4286	13.1686
I 1155135	three_prime_utr	WBGene00000165	aps-3	63	18	28.57	48	20	41.6667	13.0967
I 10819519	three_prime_utr	WBGene00016458	C35E7.6	105	6	5.71	48	9	18.75	13.04
I 1155046	three_prime_utr	WBGene00000165	aps-3	29	22	75.86	18	16	88.8889	13.0289
I 10819243	three_prime_utr	WBGene00016458	C35E7.6	108	3	2.78	19	3	15.7895	13.0095
X 1011612	exon	WBGene00023069	rncs-1	54	5	9.26	9	2	22.2222	12.9622
V 19927446	three_prime_utr	WBGene00013362	Y60A3A.14	10	3	30	7	3	42.8571	12.8571
I 2076362	three_prime_utr	WBGene00021351	Y37E3.10	46	11	23.91	68	25	36.7647	12.8547
I 10819721	three_prime_utr	WBGene00016458	C35E7.6	109	95	87.16	51	51	100	12.84
V 19926936	three_prime_utr	WBGene00013362	Y60A3A.14	19	3	15.79	7	2	28.5714	12.7814
I 1155086	three_prime_utr	WBGene00000165	aps-3	48	8	16.67	34	10	29.4118	12.7418
V 19927309	three_prime_utr	WBGene00013362	Y60A3A.14	11	3	27.27	5	2	40	12.73
I 1155161	three_prime_utr	WBGene00000165	aps-3	53	37	69.81	40	33	82.5	12.69
I 10820012	three_prime_utr	WBGene00016458	C35E7.6	64	6	9.38	59	13	22.0339	12.6539
I 1154746	three_prime_utr	WBGene00000165	aps-3	57	14	24.56	43	16	37.2093	12.6493
V 3750107	three_prime_utr	WBGene00021482	Y39H10A.6	63	2	3.17	19	3	15.7895	12.6195
V 3749583	three_prime_utr	WBGene00021482	Y39H10A.6	52	5	9.62	9	2	22.2222	12.6022
I 1359429	three_prime_utr	WBGene00022363	Y92H12BL.1	24	17	70.83	12	10	83.3333	12.5033
I 1347136	intergenic	intergenic	#N/A	24	18	75	8	7	87.5	12.5
V 13135818	three_prime_utr	WBGene00007153	clec-41	8	7	87.5	5	5	100	12.5
IV 13408944	three_prime_utr	WBGene00013382	gcl-1	40	11	27.5	5	2	40	12.5
III 12623264	three_prime_utr	WBGene00013735	Y111B2A.12	16	14	87.5	6	6	100	12.5
I 10820215	three_prime_utr	WBGene00016458	C35E7.6	96	65	67.71	45	36	80	12.29
I 10820406	three_prime_utr	WBGene00016458	C35E7.6	92	10	10.87	39	9	23.0769	12.2069
II 5725440	intron	WBGene00004267	rab-3	165	11	6.67	16	3	18.75	12.08
I 10820143	three_prime_utr	WBGene00016458	C35E7.6	69	17	24.64	41	15	36.5854	11.9454
I 10820052	three_prime_utr	WBGene00016458	C35E7.6	37	3	8.11	15	3	20	11.89
IV 13408516	three_prime_utr	WBGene00013382	gcl-1	32	9	28.12	5	2	40	11.88
I 2296937	three_prime_utr	WBGene00021469	Y39G10AR.11	62	34	54.84	6	4	66.6667	11.8267
I 1154656	three_prime_utr	WBGene00000165	aps-3	59	2	3.39	60	9	15	11.61
I 1359393	three_prime_utr	WBGene00022363	Y92H12BL.1	26	7	26.92	13	5	38.4615	11.5415
II 5725504	intron	WBGene00004267	rab-3	116	6	5.17	6	1	16.6667	11.4967
I 1154683	three_prime_utr	WBGene00000165	aps-3	55	4	7.27	16	3	18.75	11.48
I 1376107	three_prime_utr	WBGene00022366	Y92H12BL.5	35	31	88.57	5	5	100	11.43
V 13037228	three_prime_utr	WBGene00012337	W07G4.3	15	9	60	7	5	71.4286	11.4286
V 19927376	three_prime_utr	WBGene00013362	Y60A3A.14	15	7	46.67	31	18	58.0645	11.3945
I 1359372	three_prime_utr	WBGene00022363	Y92H12BL.1	27	22	81.48	14	13	92.8571	11.3771
I 10819284	intergenic	intergenic	#N/A	102	3	2.94	14	2	14.2857	11.3457
I 10819361	three_prime_utr	WBGene00016458	C35E7.6	102	7	6.86	22	4	18.1818	11.3218
I 11603773	intergenic	intergenic	#N/A	57	5	8.77	5	1	20	11.23
I 10819518	three_prime_utr	WBGene00016458	C35E7.6	103	52	50.49	47	29	61.7021	11.2121
I 2076456	three_prime_utr	WBGene00021351	Y37E3.10	20	7	35	26	12	46.1538	11.1538
I 10819674	intergenic	intergenic	#N/A	106	2	1.89	23	3	13.0435	11.1535
I 10820114	three_prime_utr	WBGene00016458	C35E7.6	60	14	23.33	29	10	34.4828	11.1528
I 10819272	intergenic	intergenic	#N/A	109	19	17.43	21	6	28.5714	11.1414
II 13485939	three_prime_utr	WBGene00000113	alh-7	27	24	88.89	13	13	100	11.11
I 10819769	three_prime_utr	WBGene00016458	C35E7.6	121	35	28.93	35	14	40	11.07
I 2296731	three_prime_utr	WBGene00021469	Y39G10AR.11	89	8	8.99	10	2	20	11.01
I 10820510	three_prime_utr	WBGene00016458	C35E7.6	102	7	6.86	28	5	17.8571	10.9971
I 629921	three_prime_utr	WBGene00022029	Y65B4A.6	41	19	46.34	7	4	57.1429	10.8029
I 10819352	three_prime_utr	WBGene00016458	C35E7.6	98	17	17.35	32	9	28.125	10.775
I 11924698	three_prime_utr	WBGene00006958	wve-1	26	18	69.23	10	8	80	10.77
I 10820462	three_prime_utr	WBGene00016458	C35E7.6	99	11	11.11	32	7	21.875	10.765
I 1154702	three_prime_utr	WBGene00000165	aps-3	61	5	8.2	53	10	18.8679	10.6679
I 10820419	three_prime_utr	WBGene00016458	C35E7.6	89	53	59.55	47	33	70.2128	10.6628
V 19927322	three_prime_utr	WBGene00013362	Y60A3A.14	11	8	72.73	18	15	83.3333	10.6033
I 10820149	three_prime_utr	WBGene00016458	C35E7.6	72	4	5.56	31	5	16.129	10.569
I 10820349	three_prime_utr	WBGene00016458	C35E7.6	88	41	46.59	7	4	57.1429	10.5529
I 10819998	three_prime_utr	WBGene00016458	C35E7.6	73	27	36.99	61	29	47.541	10.551
I 10819302	three_prime_utr	WBGene00016458	C35E7.6	107	14	13.08	17	4	23.5294	10.4494
I 10820189	three_prime_utr	WBGene00016458	C35E7.6	89	21	23.6	47	16	34.0426	10.4426
I 10819544	three_prime_utr	WBGene00016458	C35E7.6	109	22	20.18	49	15	30.6122	10.4322
I 1154671	three_prime_utr	WBGene00000165	aps-3	59	13	22.03	37	12	32.4324	10.4024
I 1155104	three_prime_utr	WBGene00000165	aps-3	57	3	5.26	32	5	15.625	10.365
V 2646522	three_prime_utr	WBGene00020957	W02H5.2	13	3	23.08	9	3	33.3333	10.2533
I 10819367	three_prime_utr	WBGene00016458	C35E7.6	99	4	4.04	21	3	14.2857	10.2457
I 10820427	three_prime_utr	WBGene00016458	C35E7.6	92	9	9.78	35	7	20	10.22
I 2076630	three_prime_utr	WBGene00021351	Y37E3.10	19	7	36.84	34	16	47.0588	10.2188
V 6173811	CDS	WBGene00006436	ttn-1	6	1	16.67	97	26	26.8041	10.1341
I 10819197	three_prime_utr	WBGene00016458	C35E7.6	95	45	47.37	40	23	57.5	10.13
I 630412	three_prime_utr	WBGene00022029	Y65B4A.6	41	8	19.51	27	8	29.6296	10.1196
I 10819761	three_prime_utr	WBGene00016458	C35E7.6	123	27	21.95	50	16	32	10.05
V 2646751	three_prime_utr	WBGene00020957	W02H5.2	14	7	50	5	3	60	10
II 15105932	intron	WBGene00013167	Y53F4B.21	6	3	50	5	3	60	10
V 2646500	three_prime_utr	WBGene00020957	W02H5.2	15	3	20	10	3	30	10
III 850851	three_prime_utr	WBGene00019326	K02F3.2	60	4	6.67	12	2	16.6667	9.99667
I 10819280	three_prime_utr	WBGene00016458	C35E7.6	104	50	48.08	31	18	58.0645	9.98452
I 10820508	three_prime_utr	WBGene00016458	C35E7.6	102	24	23.53	60	20	33.3333	9.80333
I 10819222	three_prime_utr	WBGene00016458	C35E7.6	102	18	17.65	44	12	27.2727	9.62273
I 1154774	three_prime_utr	WBGene00000165	aps-3	47	12	25.53	37	13	35.1351	9.60514
I 10820151	three_prime_utr	WBGene00016458	C35E7.6	74	4	5.41	20	3	15	9.59
I 1154709	three_prime_utr	WBGene00000165	aps-3	55	46	83.64	44	41	93.1818	9.54182
II 15105915	intron	WBGene00013167	Y53F4B.21	6	2	33.33	7	3	42.8571	9.52714
I 10819391	three_prime_utr	WBGene00016458	C35E7.6	81	30	37.04	43	20	46.5116	9.47163
I 10819313	intergenic	intergenic	#N/A	101	6	5.94	13	2	15.3846	9.44462
I 1155181	three_prime_utr	WBGene00000165	aps-3	52	14	26.92	47	17	36.1702	9.25021
V 950761	three_prime_utr	WBGene00005024	sqv-6	17	13	76.47	7	6	85.7143	9.24429
V 19926931	three_prime_utr	WBGene00013362	Y60A3A.14	19	3	15.79	8	2	25	9.21
I 10820125	three_prime_utr	WBGene00016458	C35E7.6	67	3	4.48	22	3	13.6364	9.15636
I 10820037	three_prime_utr	WBGene00016458	C35E7.6	48	3	6.25	13	2	15.3846	9.13462
V 3749577	three_prime_utr	WBGene00021482	Y39H10A.6	53	4	7.55	6	1	16.6667	9.11667
I 1358788	three_prime_utr	WBGene00022363	Y92H12BL.1	22	20	90.91	9	9	100	9.09
I 10820477	three_prime_utr	WBGene00016458	C35E7.6	100	4	4	23	3	13.0435	9.04348
I 1155207	three_prime_utr	WBGene00000165	aps-3	48	5	10.42	36	7	19.4444	9.02444
V 3750089	three_prime_utr	WBGene00021482	Y39H10A.6	58	7	12.07	19	4	21.0526	8.98263
I 10820253	three_prime_utr	WBGene00016458	C35E7.6	92	9	9.78	16	3	18.75	8.97
I 10820436	three_prime_utr	WBGene00016458	C35E7.6	94	5	5.32	7	1	14.2857	8.96571
I 10820389	three_prime_utr	WBGene00016458	C35E7.6	91	11	12.09	19	4	21.0526	8.96263
I 1155194	three_prime_utr	WBGene00000165	aps-3	52	5	9.62	27	5	18.5185	8.89852
I 10820473	three_prime_utr	WBGene00016458	C35E7.6	103	8	7.77	30	5	16.6667	8.89667
I 10819180	three_prime_utr	WBGene00016458	C35E7.6	92	42	45.65	55	30	54.5455	8.89545
II 5724890	intergenic	intergenic	#N/A	173	5	2.89	17	2	11.7647	8.87471
III 1555616	three_prime_utr	WBGene00022057	Y67D2.7	17	7	41.18	6	3	50	8.82
I 1155124	three_prime_utr	WBGene00000165	aps-3	60	4	6.67	26	4	15.3846	8.71462
I 10820429	three_prime_utr	WBGene00016458	C35E7.6	92	16	17.39	46	12	26.087	8.69696
I 10819560	three_prime_utr	WBGene00016458	C35E7.6	108	11	10.19	69	13	18.8406	8.65058
I 10819565	three_prime_utr	WBGene00016458	C35E7.6	106	22	20.75	75	22	29.3333	8.58333
I 630424	three_prime_utr	WBGene00022029	Y65B4A.6	40	8	20	28	8	28.5714	8.57143
II 13485940	three_prime_utr	WBGene00000113	alh-7	28	17	60.71	13	9	69.2308	8.52077
I 10820188	three_prime_utr	WBGene00016458	C35E7.6	90	8	8.89	52	9	17.3077	8.41769
I 1359424	three_prime_utr	WBGene00022363	Y92H12BL.1	24	20	83.33	12	11	91.6667	8.33667
I 3034589	three_prime_utr	WBGene00021841	Y54E10BR.2	15	1	6.67	20	3	15	8.33
I 10819199	three_prime_utr	WBGene00016458	C35E7.6	99	13	13.13	14	3	21.4286	8.29857
I 10820077	three_prime_utr	WBGene00016458	C35E7.6	34	4	11.76	5	1	20	8.24
III 12671432	three_prime_utr	WBGene00006389	taf-7.2	17	2	11.76	5	1	20	8.24
I 10819741	three_prime_utr	WBGene00016458	C35E7.6	121	16	13.22	56	12	21.4286	8.20857
I 10820442	three_prime_utr	WBGene00016458	C35E7.6	93	4	4.3	32	4	12.5	8.2
I 10819329	intergenic	intergenic	#N/A	96	15	15.62	21	5	23.8095	8.18952
III 9513199	three_prime_utr	WBGene00010131	F55H2.5	65	4	6.15	7	1	14.2857	8.13571
I 1154755	three_prime_utr	WBGene00000165	aps-3	52	1	1.92	20	2	10	8.08
IV 13408931	three_prime_utr	WBGene00013382	gcl-1	41	26	63.41	7	5	71.4286	8.01857
I 10819480	three_prime_utr	WBGene00016458	C35E7.6	108	19	17.59	43	11	25.5814	7.9914
I 10819355	three_prime_utr	WBGene00016458	C35E7.6	98	10	10.2	22	4	18.1818	7.98182
I 2076677	three_prime_utr	WBGene00021351	Y37E3.10	23	2	8.7	42	7	16.6667	7.96667
II 5725481	intron	WBGene00004267	rab-3	126	4	3.17	9	1	11.1111	7.94111
I 10819732	three_prime_utr	WBGene00016458	C35E7.6	117	47	40.17	52	25	48.0769	7.90692
I 10819897	three_prime_utr	WBGene00016458	C35E7.6	140	17	12.14	10	2	20	7.86
X 1012016	exon	WBGene00023069	rncs-1	62	4	6.45	7	1	14.2857	7.83571
X 1011988	exon	WBGene00023069	rncs-1	72	11	15.28	13	3	23.0769	7.79692
I 10820404	three_prime_utr	WBGene00016458	C35E7.6	94	5	5.32	23	3	13.0435	7.72348
I 1154997	three_prime_utr	WBGene00000165	aps-3	13	12	92.31	5	5	100	7.69
V 4627710	three_prime_utr	WBGene00018812	sumv-2	26	24	92.31	10	10	100	7.69
I 10819314	three_prime_utr	WBGene00016458	C35E7.6	101	68	67.33	24	18	75	7.67
I 1154606	three_prime_utr	WBGene00000165	aps-3	43	30	69.77	53	41	77.3585	7.58849
I 10820461	three_prime_utr	WBGene00016458	C35E7.6	99	4	4.04	43	5	11.6279	7.58791
I 10819392	three_prime_utr	WBGene00016458	C35E7.6	77	64	83.12	43	39	90.6977	7.57767
I 10820175	three_prime_utr	WBGene00016458	C35E7.6	89	15	16.85	41	10	24.3902	7.54024
I 10819310	three_prime_utr	WBGene00016458	C35E7.6	102	15	14.71	18	4	22.2222	7.51222
II 3320259	exon	WBGene00018194	F39E9.1	16	2	12.5	5	1	20	7.5
I 10820315	three_prime_utr	WBGene00016458	C35E7.6	88	55	62.5	10	7	70	7.5
I 10820137	three_prime_utr	WBGene00016458	C35E7.6	68	49	72.06	39	31	79.4872	7.42718
II 5725490	intron	WBGene00004267	rab-3	115	8	6.96	7	1	14.2857	7.32571
V 3749953	three_prime_utr	WBGene00021482	Y39H10A.6	33	24	72.73	5	4	80	7.27
I 10819240	three_prime_utr	WBGene00016458	C35E7.6	108	24	22.22	17	5	29.4118	7.19176
V 3750078	three_prime_utr	WBGene00021482	Y39H10A.6	56	10	17.86	20	5	25	7.14
I 2033878	three_prime_utr	WBGene00021237	crtc-1	62	43	69.35	34	26	76.4706	7.12059
I 630462	three_prime_utr	WBGene00022029	Y65B4A.6	31	4	12.9	10	2	20	7.1
I 1155087	three_prime_utr	WBGene00000165	aps-3	48	4	8.33	13	2	15.3846	7.05462
I 10819341	intergenic	intergenic	#N/A	91	15	16.48	17	4	23.5294	7.04941
I 10819911	three_prime_utr	WBGene00016458	C35E7.6	135	13	9.63	12	2	16.6667	7.03667
X 1012023	exon	WBGene00023069	rncs-1	59	5	8.47	13	2	15.3846	6.91462
V 19927417	three_prime_utr	WBGene00013362	Y60A3A.14	15	7	46.67	28	15	53.5714	6.90143
X 1012068	exon	WBGene00023069	rncs-1	57	3	5.26	33	4	12.1212	6.86121
I 1154725	three_prime_utr	WBGene00000165	aps-3	55	8	14.55	47	10	21.2766	6.7266
V 2646752	three_prime_utr	WBGene00020957	W02H5.2	15	8	53.33	5	3	60	6.67
II 13486717	three_prime_utr	WBGene00000113	alh-7	15	14	93.33	7	7	100	6.67
V 13135043	three_prime_utr	WBGene00007153	clec-41	15	5	33.33	5	2	40	6.67
I 10819994	three_prime_utr	WBGene00016458	C35E7.6	75	11	14.67	61	13	21.3115	6.64148
I 1155289	three_prime_utr	WBGene00000165	aps-3	37	34	91.89	68	67	98.5294	6.63941
I 10820285	intergenic	intergenic	#N/A	97	13	13.4	5	1	20	6.6
I 10820287	three_prime_utr	WBGene00016458	C35E7.6	97	30	30.93	8	3	37.5	6.57
I 2296719	three_prime_utr	WBGene00021469	Y39G10AR.11	92	40	43.48	16	8	50	6.52
I 2076411	three_prime_utr	WBGene00021351	Y37E3.10	36	9	25	54	17	31.4815	6.48148
II 5725460	intron	WBGene00004267	rab-3	150	7	4.67	9	1	11.1111	6.44111
I 10819454	three_prime_utr	WBGene00016458	C35E7.6	98	5	5.1	26	3	11.5385	6.43846
I 10819530	three_prime_utr	WBGene00016458	C35E7.6	107	12	11.21	51	9	17.6471	6.43706
I 10819656	three_prime_utr	WBGene00016458	C35E7.6	97	87	89.69	77	74	96.1039	6.4139
I 10820327	three_prime_utr	WBGene00016458	C35E7.6	92	35	38.04	9	4	44.4444	6.40444
I 630406	three_prime_utr	WBGene00022029	Y65B4A.6	43	8	18.6	36	9	25	6.4
I 1155174	three_prime_utr	WBGene00000165	aps-3	47	44	93.62	35	35	100	6.38
I 10819204	three_prime_utr	WBGene00016458	C35E7.6	97	6	6.19	8	1	12.5	6.31
II 13486034	three_prime_utr	WBGene00000113	alh-7	25	2	8	14	2	14.2857	6.28571
II 13486727	three_prime_utr	WBGene00000113	alh-7	16	13	81.25	8	7	87.5	6.25
I 1154703	three_prime_utr	WBGene00000165	aps-3	62	5	8.06	35	5	14.2857	6.22571
II 5724928	intergenic	intergenic	#N/A	194	8	4.12	29	3	10.3448	6.22483
I 10819235	three_prime_utr	WBGene00016458	C35E7.6	108	23	21.3	40	11	27.5	6.2
I 1154795	three_prime_utr	WBGene00000165	aps-3	48	10	20.83	37	10	27.027	6.19703
I 10819182	three_prime_utr	WBGene00016458	C35E7.6	91	6	6.59	47	6	12.766	6.17596
I 1155290	three_prime_utr	WBGene00000165	aps-3	38	11	28.95	57	20	35.0877	6.13772
I 1155079	three_prime_utr	WBGene00000165	aps-3	43	6	13.95	30	6	20	6.05
I 630433	three_prime_utr	WBGene00022029	Y65B4A.6	40	4	10	25	4	16	6
I 2296938	three_prime_utr	WBGene00021469	Y39G10AR.11	62	48	77.42	6	5	83.3333	5.91333
II 5725428	intron	WBGene00004267	rab-3	173	9	5.2	18	2	11.1111	5.91111
I 1155276	three_prime_utr	WBGene00000165	aps-3	36	4	11.11	71	12	16.9014	5.79141
I 2296697	three_prime_utr	WBGene00021469	Y39G10AR.11	95	42	44.21	14	7	50	5.79
V 19927317	three_prime_utr	WBGene00013362	Y60A3A.14	11	9	81.82	16	14	87.5	5.68
V 3749998	three_prime_utr	WBGene00021482	Y39H10A.6	43	16	37.21	14	6	42.8571	5.64714
I 1359178	three_prime_utr	WBGene00022363	Y92H12BL.1	9	7	77.78	6	5	83.3333	5.55333
I 3167607	three_prime_utr	WBGene00021828	Y54E10A.6	12	2	16.67	9	2	22.2222	5.55222
I 10819939	three_prime_utr	WBGene00016458	C35E7.6	123	21	17.07	31	7	22.5806	5.51065
I 630413	three_prime_utr	WBGene00022029	Y65B4A.6	41	20	48.78	24	13	54.1667	5.38667
I 1154646	three_prime_utr	WBGene00000165	aps-3	56	9	16.07	42	9	21.4286	5.35857
V 4627784	three_prime_utr	WBGene00018812	sumv-2	16	6	37.5	7	3	42.8571	5.35714
I 10820519	three_prime_utr	WBGene00016458	C35E7.6	107	4	3.74	33	3	9.09091	5.35091
II 13485956	three_prime_utr	WBGene00000113	alh-7	25	12	48	15	8	53.3333	5.33333
V 4627782	three_prime_utr	WBGene00018812	sumv-2	16	5	31.25	11	4	36.3636	5.11364
V 3750141	three_prime_utr	WBGene00021482	Y39H10A.6	75	5	6.67	17	2	11.7647	5.09471
I 10819196	three_prime_utr	WBGene00016458	C35E7.6	95	11	11.58	30	5	16.6667	5.08667
I 10820292	three_prime_utr	WBGene00016458	C35E7.6	97	48	49.48	11	6	54.5455	5.06545
X 1011609	exon	WBGene00023069	rncs-1	54	5	9.26	14	2	14.2857	5.02571
I 2076409	three_prime_utr	WBGene00021351	Y37E3.10	37	2	5.41	48	5	10.4167	5.00667
II 13486816	three_prime_utr	WBGene00000113	alh-7	20	19	95	5	5	100	5
V 3749654	three_prime_utr	WBGene00021482	Y39H10A.6	12	3	25	10	3	30	5
V 13135061	three_prime_utr	WBGene00007153	clec-41	15	3	20	8	2	25	5
I 10819971	three_prime_utr	WBGene00016458	C35E7.6	94	11	11.7	48	8	16.6667	4.96667
I 2076390	three_prime_utr	WBGene00021351	Y37E3.10	43	3	6.98	67	8	11.9403	4.9603
I 10820138	three_prime_utr	WBGene00016458	C35E7.6	68	54	79.41	38	32	84.2105	4.80053
I 10819400	three_prime_utr	WBGene00016458	C35E7.6	83	30	36.14	44	18	40.9091	4.76909
II 13486676	three_prime_utr	WBGene00000113	alh-7	21	6	28.57	12	4	33.3333	4.76333
I 10819555	three_prime_utr	WBGene00016458	C35E7.6	107	9	8.41	38	5	13.1579	4.74789
I 1155173	three_prime_utr	WBGene00000165	aps-3	47	30	63.83	35	24	68.5714	4.74143
II 5724871	intergenic	intergenic	#N/A	172	7	4.07	23	2	8.69565	4.62565
I 10819154	intergenic	intergenic	#N/A	93	5	5.38	10	1	10	4.62
I 2033879	three_prime_utr	WBGene00021237	crtc-1	62	6	9.68	21	3	14.2857	4.60571
I 10819724	three_prime_utr	WBGene00016458	C35E7.6	111	6	5.41	40	4	10	4.59
II 5725138	intron	WBGene00004267	rab-3	202	11	5.45	10	1	10	4.55
I 1154701	three_prime_utr	WBGene00000165	aps-3	61	10	16.39	43	9	20.9302	4.54023
I 10819156	three_prime_utr	WBGene00016458	C35E7.6	92	26	28.26	61	20	32.7869	4.52689
I 10819581	three_prime_utr	WBGene00016458	C35E7.6	97	50	51.55	66	37	56.0606	4.51061
I 10819760	three_prime_utr	WBGene00016458	C35E7.6	123	24	19.51	50	12	24	4.49
I 3034569	three_prime_utr	WBGene00021841	Y54E10BR.2	15	11	73.33	18	14	77.7778	4.44778
II 5724885	intergenic	intergenic	#N/A	172	5	2.91	69	5	7.24638	4.33638
IV 13408947	three_prime_utr	WBGene00013382	gcl-1	42	15	35.71	5	2	40	4.29
V 2646491	three_prime_utr	WBGene00020957	W02H5.2	14	5	35.71	5	2	40	4.29
I 2033911	three_prime_utr	WBGene00021237	crtc-1	40	5	12.5	12	2	16.6667	4.16667
V 13037104	three_prime_utr	WBGene00012337	W07G4.3	56	49	87.5	12	11	91.6667	4.16667
X 1012159	exon	WBGene00023069	rncs-1	49	4	8.16	41	5	12.1951	4.03512
I 1155232	three_prime_utr	WBGene00000165	aps-3	45	10	22.22	61	16	26.2295	4.00951
I 10820416	three_prime_utr	WBGene00016458	C35E7.6	92	4	4.35	12	1	8.33333	3.98333
I 10819680	three_prime_utr	WBGene00016458	C35E7.6	108	6	5.56	21	2	9.52381	3.96381
I 2076767	three_prime_utr	WBGene00021351	Y37E3.10	45	19	42.22	78	36	46.1538	3.93385
II 5724906	intergenic	intergenic	#N/A	180	8	4.44	12	1	8.33333	3.89333
I 2076655	three_prime_utr	WBGene00021351	Y37E3.10	21	4	19.05	35	8	22.8571	3.80714
I 10819532	three_prime_utr	WBGene00016458	C35E7.6	108	11	10.19	43	6	13.9535	3.76349
II 14346992	three_prime_utr	WBGene00002996	lin-7	27	11	40.74	9	4	44.4444	3.70444
I 10819158	three_prime_utr	WBGene00016458	C35E7.6	93	24	25.81	61	18	29.5082	3.6982
I 10819399	three_prime_utr	WBGene00016458	C35E7.6	84	7	8.33	42	5	11.9048	3.57476
I 630423	three_prime_utr	WBGene00022029	Y65B4A.6	41	24	58.54	29	18	62.069	3.52897
I 10819496	three_prime_utr	WBGene00016458	C35E7.6	112	11	9.82	45	6	13.3333	3.51333
I 2076649	three_prime_utr	WBGene00021351	Y37E3.10	22	7	31.82	17	6	35.2941	3.47412
I 10819533	three_prime_utr	WBGene00016458	C35E7.6	109	22	20.18	51	12	23.5294	3.34941
V 4627799	three_prime_utr	WBGene00018812	sumv-2	15	2	13.33	6	1	16.6667	3.33667
I 2076645	three_prime_utr	WBGene00021351	Y37E3.10	20	4	20	30	7	23.3333	3.33333
I 2076388	three_prime_utr	WBGene00021351	Y37E3.10	45	11	24.44	65	18	27.6923	3.25231
I 10819209	three_prime_utr	WBGene00016458	C35E7.6	97	9	9.28	32	4	12.5	3.22
I 1154863	three_prime_utr	WBGene00000165	aps-3	32	31	96.88	14	14	100	3.12
I 2034085	three_prime_utr	WBGene00021237	crtc-1	35	18	51.43	11	6	54.5455	3.11545
I 1154996	three_prime_utr	WBGene00000165	aps-3	13	10	76.92	5	4	80	3.08
I 10820197	three_prime_utr	WBGene00016458	C35E7.6	97	10	10.31	30	4	13.3333	3.02333
I 10819322	intergenic	intergenic	#N/A	100	7	7	10	1	10	3
I 10819195	three_prime_utr	WBGene00016458	C35E7.6	95	15	15.79	32	6	18.75	2.96
I 10820051	three_prime_utr	WBGene00016458	C35E7.6	38	8	21.05	25	6	24	2.95
V 3750117	three_prime_utr	WBGene00021482	Y39H10A.6	63	41	65.08	25	17	68	2.92
I 10820459	intergenic	intergenic	#N/A	97	6	6.19	11	1	9.09091	2.90091
I 10819683	three_prime_utr	WBGene00016458	C35E7.6	107	8	7.48	58	6	10.3448	2.86483
II 5725240	intergenic	intergenic	#N/A	183	4	2.19	20	1	5	2.81
I 629831	three_prime_utr	WBGene00022029	Y65B4A.6	26	16	61.54	14	9	64.2857	2.74571
I 10819619	three_prime_utr	WBGene00016458	C35E7.6	101	5	4.95	92	7	7.6087	2.6587
II 5724886	intergenic	intergenic	#N/A	173	8	4.62	69	5	7.24638	2.62638
V 950652	three_prime_utr	WBGene00005024	sqv-6	11	6	54.55	14	8	57.1429	2.59286
I 10819504	three_prime_utr	WBGene00016458	C35E7.6	107	74	69.16	46	33	71.7391	2.57913
I 10820518	three_prime_utr	WBGene00016458	C35E7.6	109	5	4.59	14	1	7.14286	2.55286
I 10819393	three_prime_utr	WBGene00016458	C35E7.6	82	12	14.63	41	7	17.0732	2.44317
I 10819241	three_prime_utr	WBGene00016458	C35E7.6	108	19	17.59	35	7	20	2.41
I 10819770	three_prime_utr	WBGene00016458	C35E7.6	122	47	38.52	44	18	40.9091	2.38909
V 19926841	three_prime_utr	WBGene00013362	Y60A3A.14	14	2	14.29	12	2	16.6667	2.37667
I 2076482	three_prime_utr	WBGene00021351	Y37E3.10	17	3	17.65	20	4	20	2.35
X 1012176	exon	WBGene00023069	rncs-1	45	21	46.67	51	25	49.0196	2.34961
X 1011621	exon	WBGene00023069	rncs-1	52	19	36.54	18	7	38.8889	2.34889
I 10819697	three_prime_utr	WBGene00016458	C35E7.6	107	5	4.67	44	3	6.81818	2.14818
II 5725435	intron	WBGene00004267	rab-3	167	14	8.38	19	2	10.5263	2.14632
V 3749969	three_prime_utr	WBGene00021482	Y39H10A.6	38	22	57.89	5	3	60	2.11
I 2076643	three_prime_utr	WBGene00021351	Y37E3.10	20	9	45	34	16	47.0588	2.05882
I 2076467	three_prime_utr	WBGene00021351	Y37E3.10	18	6	33.33	17	6	35.2941	1.96412
I 1347605	intergenic	intergenic	#N/A	51	33	64.71	6	4	66.6667	1.95667
I 10819326	intergenic	intergenic	#N/A	99	8	8.08	10	1	10	1.92
I 10820533	three_prime_utr	WBGene00016458	C35E7.6	119	4	3.36	38	2	5.26316	1.90316
I 10820229	three_prime_utr	WBGene00016458	C35E7.6	99	51	51.52	45	24	53.3333	1.81333
I 631010	three_prime_utr	WBGene00022029	Y65B4A.6	27	18	66.67	19	13	68.4211	1.75105
I 10819271	intergenic	intergenic	#N/A	109	15	13.76	13	2	15.3846	1.62462
X 1011610	exon	WBGene00023069	rncs-1	53	23	43.4	40	18	45	1.6
I 10819595	three_prime_utr	WBGene00016458	C35E7.6	98	11	11.22	86	11	12.7907	1.5707
I 1155312	three_prime_utr	WBGene00000165	aps-3	45	36	80	54	44	81.4815	1.48148
I 1154846	three_prime_utr	WBGene00000165	aps-3	37	8	21.62	13	3	23.0769	1.45692
I 1154712	three_prime_utr	WBGene00000165	aps-3	55	53	96.36	44	43	97.7273	1.36727
I 10820214	three_prime_utr	WBGene00016458	C35E7.6	98	8	8.16	21	2	9.52381	1.36381
I 10819693	three_prime_utr	WBGene00016458	C35E7.6	105	80	76.19	49	38	77.551	1.36102
I 1347118	intergenic	intergenic	#N/A	17	13	76.47	9	7	77.7778	1.30778
II 13485959	three_prime_utr	WBGene00000113	alh-7	26	4	15.38	6	1	16.6667	1.28667
III 10907811	intergenic	intergenic	#N/A	161	8	4.97	16	1	6.25	1.28
II 5725217	intergenic	intergenic	#N/A	190	5	2.63	78	3	3.84615	1.21615
I 10819584	three_prime_utr	WBGene00016458	C35E7.6	99	30	30.3	73	23	31.5068	1.20685
I 1155080	three_prime_utr	WBGene00000165	aps-3	43	30	69.77	31	22	70.9677	1.19774
II 5725037	intergenic	intergenic	#N/A	221	5	2.26	29	1	3.44828	1.18828
I 1155055	three_prime_utr	WBGene00000165	aps-3	31	25	80.65	22	18	81.8182	1.16818
II 5724972	intron	WBGene00004267	rab-3	205	7	3.41	22	1	4.54545	1.13545
I 629850	three_prime_utr	WBGene00022029	Y65B4A.6	35	4	11.43	8	1	12.5	1.07
III 1555755	three_prime_utr	WBGene00022057	Y67D2.7	23	9	39.13	5	2	40	0.87
II 5724866	intron	WBGene00004267	rab-3	175	5	2.86	27	1	3.7037	0.843704
I 10819453	three_prime_utr	WBGene00016458	C35E7.6	98	5	5.1	34	2	5.88235	0.782353
MtDNA 8429	CDS	WBGene00010964	ctc-1	98	97	98.98	390	389	99.7436	0.76359
I 3034599	three_prime_utr	WBGene00021841	Y54E10BR.2	17	2	11.76	8	1	12.5	0.74
I 1359360	three_prime_utr	WBGene00022363	Y92H12BL.1	28	11	39.29	5	2	40	0.71
II 5724849	intergenic	intergenic	#N/A	165	8	4.85	54	3	5.55556	0.705556
I 10819583	three_prime_utr	WBGene00016458	C35E7.6	98	8	8.16	68	6	8.82353	0.663529
I 14855747	five_prime_utr	WBGene00000088	aex-5	181	14	7.73	24	2	8.33333	0.603333
V 4219653	five_prime_utr	WBGene00003747	nlp-9	31	3	9.68	49	5	10.2041	0.524082
II 5724858	intergenic	intergenic	#N/A	170	6	3.53	25	1	4	0.47
I 10819262	intergenic	intergenic	#N/A	107	13	12.15	8	1	12.5	0.35
II 5725241	intergenic	intergenic	#N/A	182	5	2.75	65	2	3.07692	0.326923
II 5725244	intergenic	intergenic	#N/A	180	5	2.78	65	2	3.07692	0.296923
I 1155198	three_prime_utr	WBGene00000165	aps-3	46	41	89.13	47	42	89.3617	0.231702
II 5725441	intron	WBGene00004267	rab-3	165	17	10.3	19	2	10.5263	0.226316
II 5724947	intergenic	intergenic	#N/A	202	14	6.93	28	2	7.14286	0.212857
II 5724840	intron	WBGene00004267	rab-3	162	8	4.94	39	2	5.12821	0.188205
I 1155110	three_prime_utr	WBGene00000165	aps-3	58	6	10.34	19	2	10.5263	0.186316
I 10819419	three_prime_utr	WBGene00016458	C35E7.6	93	5	5.38	18	1	5.55556	0.175556
I 10819487	three_prime_utr	WBGene00016458	C35E7.6	109	12	11.01	9	1	11.1111	0.101111
I 10819616	three_prime_utr	WBGene00016458	C35E7.6	101	10	9.9	80	8	10	0.1
II 5725139	intergenic	intergenic	#N/A	203	5	2.46	40	1	2.5	0.04
X 1011631	exon	WBGene00023069	rncs-1	60	20	33.33	6	2	33.3333	0.00333333
I 2076639	three_prime_utr	WBGene00021351	Y37E3.10	20	10	50	28	14	50	0
IV 13408932	three_prime_utr	WBGene00013382	gcl-1	40	35	87.5	8	7	87.5	0
V 4628317	three_prime_utr	WBGene00018812	sumv-2	35	14	40	5	2	40	0
II 5724776	intron	WBGene00004267	rab-3	103	4	3.88	27	1	3.7037	-0.176296
I 10820043	three_prime_utr	WBGene00016458	C35E7.6	42	5	11.9	26	3	11.5385	-0.361538
II 5725461	intron	WBGene00004267	rab-3	148	17	11.49	9	1	11.1111	-0.378889
III 10905500	intron	WBGene00006843	unc-119	94	3	3.19	36	1	2.77778	-0.412222
II 5724760	intron	WBGene00004267	rab-3	88	5	5.68	19	1	5.26316	-0.416842
III 10905463	intron	WBGene00006843	unc-119	107	4	3.74	151	5	3.31126	-0.428742
I 1359400	three_prime_utr	WBGene00022363	Y92H12BL.1	26	15	57.69	14	8	57.1429	-0.547143
I 1155107	three_prime_utr	WBGene00000165	aps-3	57	11	19.3	32	6	18.75	-0.55
I 2076481	three_prime_utr	WBGene00021351	Y37E3.10	17	12	70.59	20	14	70	-0.59
X 1012085	exon	WBGene00023069	rncs-1	56	7	12.5	42	5	11.9048	-0.595238
I 10820191	three_prime_utr	WBGene00016458	C35E7.6	88	21	23.86	43	10	23.2558	-0.604186
I 10819620	three_prime_utr	WBGene00016458	C35E7.6	100	16	16	78	12	15.3846	-0.615385
V 3750012	three_prime_utr	WBGene00021482	Y39H10A.6	43	29	67.44	18	12	66.6667	-0.773333
II 5724759	intron	WBGene00004267	rab-3	86	5	5.81	40	2	5	-0.81
I 10820286	three_prime_utr	WBGene00016458	C35E7.6	96	20	20.83	5	1	20	-0.83
V 13135049	three_prime_utr	WBGene00007153	clec-41	15	2	13.33	8	1	12.5	-0.83
II 5724782	intron	WBGene00004267	rab-3	110	5	4.55	27	1	3.7037	-0.846296
II 5725262	intron	WBGene00004267	rab-3	170	6	3.53	39	1	2.5641	-0.965897
I 1155134	three_prime_utr	WBGene00000165	aps-3	62	13	20.97	45	9	20	-0.97
II 5724841	intron	WBGene00004267	rab-3	163	6	3.68	37	1	2.7027	-0.977297
I 10819596	three_prime_utr	WBGene00016458	C35E7.6	97	15	15.46	76	11	14.4737	-0.986316
II 5724815	intergenic	intergenic	#N/A	138	5	3.62	38	1	2.63158	-0.988421
I 10819522	three_prime_utr	WBGene00016458	C35E7.6	104	26	25	46	11	23.913	-1.08696
I 10820181	three_prime_utr	WBGene00016458	C35E7.6	88	46	52.27	43	22	51.1628	-1.10721
X 1011611	exon	WBGene00023069	rncs-1	52	24	46.15	40	18	45	-1.15
I 10820497	intergenic	intergenic	#N/A	107	9	8.41	14	1	7.14286	-1.26714
V 3750090	three_prime_utr	WBGene00021482	Y39H10A.6	59	5	8.47	14	1	7.14286	-1.32714
I 629833	three_prime_utr	WBGene00022029	Y65B4A.6	27	13	48.15	15	7	46.6667	-1.48333
I 2296715	three_prime_utr	WBGene00021469	Y39G10AR.11	95	11	11.58	10	1	10	-1.58
II 9056542	intergenic	intergenic	#N/A	50	2	4	207	5	2.41546	-1.58454
X 1011584	exon	WBGene00023069	rncs-1	56	6	10.71	22	2	9.09091	-1.61909
I 14855727	CDS	WBGene00000088	aex-5	198	14	7.07	19	1	5.26316	-1.80684
II 5724837	intron	WBGene00004267	rab-3	159	7	4.4	39	1	2.5641	-1.8359
II 13487364	three_prime_utr	WBGene00000113	alh-7	27	14	51.85	6	3	50	-1.85
II 5725044	intergenic	intergenic	#N/A	219	12	5.48	28	1	3.57143	-1.90857
II 5724823	intron	WBGene00004267	rab-3	146	8	5.48	28	1	3.57143	-1.90857
I 1155272	three_prime_utr	WBGene00000165	aps-3	39	15	38.46	74	27	36.4865	-1.97351
III 10905426	intron	WBGene00006843	unc-119	113	4	3.54	71	1	1.40845	-2.13155
II 13486678	three_prime_utr	WBGene00000113	alh-7	21	10	47.62	11	5	45.4545	-2.16545
I 10819285	three_prime_utr	WBGene00016458	C35E7.6	102	20	19.61	23	4	17.3913	-2.2187
V 3749628	three_prime_utr	WBGene00021482	Y39H10A.6	9	2	22.22	5	1	20	-2.22
I 10819580	three_prime_utr	WBGene00016458	C35E7.6	97	57	58.76	69	39	56.5217	-2.23826
I 2076680	three_prime_utr	WBGene00021351	Y37E3.10	23	4	17.39	33	5	15.1515	-2.23848
X 1011763	exon	WBGene00023069	rncs-1	42	36	85.71	6	5	83.3333	-2.37667
I 2076673	three_prime_utr	WBGene00021351	Y37E3.10	23	4	17.39	40	6	15	-2.39
II 5725163	intron	WBGene00004267	rab-3	185	8	4.32	54	1	1.85185	-2.46815
X 1012191	exon	WBGene00023069	rncs-1	50	13	26	60	14	23.3333	-2.66667
I 10820453	three_prime_utr	WBGene00016458	C35E7.6	95	11	11.58	23	2	8.69565	-2.88435
II 5724847	intron	WBGene00004267	rab-3	165	9	5.45	39	1	2.5641	-2.8859
II 5724884	intron	WBGene00004267	rab-3	174	12	6.9	25	1	4	-2.9
I 10819194	three_prime_utr	WBGene00016458	C35E7.6	93	55	59.14	41	23	56.0976	-3.04244
I 10819207	three_prime_utr	WBGene00016458	C35E7.6	96	24	25	41	9	21.9512	-3.04878
V 19926934	three_prime_utr	WBGene00013362	Y60A3A.14	19	18	94.74	12	11	91.6667	-3.07333
I 11924696	three_prime_utr	WBGene00006958	wve-1	26	6	23.08	10	2	20	-3.08
II 5724836	intron	WBGene00004267	rab-3	160	9	5.62	40	1	2.5	-3.12
I 2076648	three_prime_utr	WBGene00021351	Y37E3.10	20	8	40	19	7	36.8421	-3.15789
I 1155283	three_prime_utr	WBGene00000165	aps-3	38	16	42.11	72	28	38.8889	-3.22111
III 2707578	three_prime_utr	WBGene00022173	set-27	15	8	53.33	6	3	50	-3.33
V 17870645	five_prime_utr	WBGene00000813	csn-1	17	2	11.76	36	3	8.33333	-3.42667
I 1155162	three_prime_utr	WBGene00000165	aps-3	53	39	73.58	40	28	70	-3.58
I 1154708	three_prime_utr	WBGene00000165	aps-3	55	42	76.36	44	32	72.7273	-3.63273
I 2076363	three_prime_utr	WBGene00021351	Y37E3.10	46	43	93.48	68	61	89.7059	-3.77412
II 5725418	intron	WBGene00004267	rab-3	175	22	12.57	23	2	8.69565	-3.87435
II 5724781	intron	WBGene00004267	rab-3	109	9	8.26	48	2	4.16667	-4.09333
I 10819737	three_prime_utr	WBGene00016458	C35E7.6	119	12	10.08	34	2	5.88235	-4.19765
II 5725088	intergenic	intergenic	#N/A	206	15	7.28	35	1	2.85714	-4.42286
V 4627711	three_prime_utr	WBGene00018812	sumv-2	27	12	44.44	10	4	40	-4.44
I 2076410	three_prime_utr	WBGene00021351	Y37E3.10	37	14	37.84	48	16	33.3333	-4.50667
X 1011615	exon	WBGene00023069	rncs-1	54	12	22.22	17	3	17.6471	-4.57294
V 3749589	three_prime_utr	WBGene00021482	Y39H10A.6	47	10	21.28	6	1	16.6667	-4.61333
V 13135849	three_prime_utr	WBGene00007153	clec-41	13	11	84.62	10	8	80	-4.62
I 3034556	three_prime_utr	WBGene00021841	Y54E10BR.2	14	3	21.43	6	1	16.6667	-4.76333
V 13135861	three_prime_utr	WBGene00007153	clec-41	14	10	71.43	12	8	66.6667	-4.76333
I 630837	three_prime_utr	WBGene00022029	Y65B4A.6	14	10	71.43	6	4	66.6667	-4.76333
I 10819586	three_prime_utr	WBGene00016458	C35E7.6	99	20	20.2	52	8	15.3846	-4.81538
X 1012184	exon	WBGene00023069	rncs-1	44	9	20.45	45	7	15.5556	-4.89444
I 3255683	three_prime_utr	WBGene00003258	cogc-1	12	3	25	10	2	20	-5
I 10819633	three_prime_utr	WBGene00016458	C35E7.6	101	16	15.84	56	6	10.7143	-5.12571
V 13135915	three_prime_utr	WBGene00007153	clec-41	26	10	38.46	24	8	33.3333	-5.12667
X 1012046	exon	WBGene00023069	rncs-1	56	47	83.93	28	22	78.5714	-5.35857
X 1012205	exon	WBGene00023069	rncs-1	64	13	20.31	75	11	14.6667	-5.64333
V 13135033	three_prime_utr	WBGene00007153	clec-41	15	3	20	14	2	14.2857	-5.71429
I 1154651	three_prime_utr	WBGene00000165	aps-3	57	22	38.6	55	18	32.7273	-5.87273
I 630410	three_prime_utr	WBGene00022029	Y65B4A.6	42	19	45.24	28	11	39.2857	-5.95429
V 19927403	three_prime_utr	WBGene00013362	Y60A3A.14	17	16	94.12	33	29	87.8788	-6.24121
II 5725417	intron	WBGene00004267	rab-3	174	26	14.94	23	2	8.69565	-6.24435
I 10819607	three_prime_utr	WBGene00016458	C35E7.6	102	15	14.71	60	5	8.33333	-6.37667
I 1347102	intergenic	intergenic	#N/A	17	6	35.29	7	2	28.5714	-6.71857
X 1012211	exon	WBGene00023069	rncs-1	64	13	20.31	37	5	13.5135	-6.79649
V 3749543	three_prime_utr	WBGene00021482	Y39H10A.6	51	36	70.59	11	7	63.6364	-6.95364
I 10820350	three_prime_utr	WBGene00016458	C35E7.6	88	69	78.41	7	5	71.4286	-6.98143
IV 13408878	three_prime_utr	WBGene00013382	gcl-1	38	9	23.68	6	1	16.6667	-7.01333
X 1011604	exon	WBGene00023069	rncs-1	57	12	21.05	57	8	14.0351	-7.01491
I 1358620	three_prime_utr	WBGene00022363	Y92H12BL.1	17	8	47.06	5	2	40	-7.06
IV 13408824	three_prime_utr	WBGene00013382	gcl-1	21	12	57.14	8	4	50	-7.14
I 630857	three_prime_utr	WBGene00022029	Y65B4A.6	14	8	57.14	6	3	50	-7.14
I 1155039	three_prime_utr	WBGene00000165	aps-3	27	21	77.78	17	12	70.5882	-7.19176
I 1154654	three_prime_utr	WBGene00000165	aps-3	59	10	16.95	41	4	9.7561	-7.1939
V 19927296	three_prime_utr	WBGene00013362	Y60A3A.14	9	2	22.22	20	3	15	-7.22
I 2076364	three_prime_utr	WBGene00021351	Y37E3.10	46	40	86.96	69	55	79.7101	-7.24986
I 10819622	three_prime_utr	WBGene00016458	C35E7.6	100	24	24	91	15	16.4835	-7.51648
I 10819330	three_prime_utr	WBGene00016458	C35E7.6	95	32	33.68	31	8	25.8065	-7.87355
V 3749530	three_prime_utr	WBGene00021482	Y39H10A.6	48	15	31.25	13	3	23.0769	-8.17308
X 1012146	exon	WBGene00023069	rncs-1	50	15	30	60	13	21.6667	-8.33333
II 15105972	intron	WBGene00013167	Y53F4B.21	5	4	80	7	5	71.4286	-8.57143
X 1012069	exon	WBGene00023069	rncs-1	56	19	33.93	12	3	25	-8.93
V 3749556	three_prime_utr	WBGene00021482	Y39H10A.6	50	17	34	12	3	25	-9
I 1155210	three_prime_utr	WBGene00000165	aps-3	47	11	23.4	28	4	14.2857	-9.11429
I 2296711	three_prime_utr	WBGene00021469	Y39G10AR.11	96	33	34.38	16	4	25	-9.38
III 12671442	three_prime_utr	WBGene00006389	taf-7.2	17	5	29.41	5	1	20	-9.41
V 13135853	three_prime_utr	WBGene00007153	clec-41	13	6	46.15	11	4	36.3636	-9.78636
II 3922541	three_prime_utr	WBGene00018756	F53C3.13	16	13	81.25	7	5	71.4286	-9.82143
I 1155057	three_prime_utr	WBGene00000165	aps-3	32	10	31.25	14	3	21.4286	-9.82143
II 13486746	three_prime_utr	WBGene00000113	alh-7	20	6	30	5	1	20	-10
I 3167619	three_prime_utr	WBGene00021828	Y54E10A.6	10	5	50	5	2	40	-10
II 7123751	CDS	WBGene00017344	F10E7.2	25	4	16	51	3	5.88235	-10.1176
I 2076632	three_prime_utr	WBGene00021351	Y37E3.10	19	6	31.58	28	6	21.4286	-10.1514
I 10639333	three_prime_utr	WBGene00015235	cdc-26	37	10	27.03	12	2	16.6667	-10.3633
II 13487386	three_prime_utr	WBGene00000113	alh-7	32	14	43.75	6	2	33.3333	-10.4167
I 1154879	three_prime_utr	WBGene00000165	aps-3	31	22	70.97	5	3	60	-10.97
I 1347117	intergenic	intergenic	#N/A	18	16	88.89	9	7	77.7778	-11.1122
X 1012200	exon	WBGene00023069	rncs-1	61	13	21.31	61	6	9.83607	-11.4739
I 630439	three_prime_utr	WBGene00022029	Y65B4A.6	39	16	41.03	17	5	29.4118	-11.6182
IV 11226065	CDS	WBGene00000699	col-125	16	2	12.5	632	4	0.632911	-11.8671
I 10820361	three_prime_utr	WBGene00016458	C35E7.6	89	33	37.08	8	2	25	-12.08
V 8924340	three_prime_utr	WBGene00019204	H14N18.4	25	12	48	14	5	35.7143	-12.2857
X 1012045	exon	WBGene00023069	rncs-1	56	35	62.5	28	14	50	-12.5
I 1358465	three_prime_utr	WBGene00022363	Y92H12BL.1	19	10	52.63	5	2	40	-12.63
V 19927318	three_prime_utr	WBGene00013362	Y60A3A.14	11	8	72.73	15	9	60	-12.73
I 630798	three_prime_utr	WBGene00022029	Y65B4A.6	11	8	72.73	5	3	60	-12.73
I 630501	three_prime_utr	WBGene00022029	Y65B4A.6	21	7	33.33	5	1	20	-13.33
X 1011650	exon	WBGene00023069	rncs-1	61	59	96.72	6	5	83.3333	-13.3867
I 1154840	three_prime_utr	WBGene00000165	aps-3	36	19	52.78	18	7	38.8889	-13.8911
I 1154711	three_prime_utr	WBGene00000165	aps-3	55	29	52.73	44	17	38.6364	-14.0936
II 13486054	three_prime_utr	WBGene00000113	alh-7	25	8	32	17	3	17.6471	-14.3529
II 13486748	three_prime_utr	WBGene00000113	alh-7	20	7	35	5	1	20	-15
I 3033941	three_prime_utr	WBGene00021841	Y54E10BR.2	20	13	65	6	3	50	-15
V 2646820	three_prime_utr	WBGene00020957	W02H5.2	17	12	70.59	9	5	55.5556	-15.0344
II 10844224	three_prime_utr	WBGene00010910	M106.2	36	21	58.33	7	3	42.8571	-15.4729
X 1011622	exon	WBGene00023069	rncs-1	50	46	92	17	13	76.4706	-15.5294
II 14347027	three_prime_utr	WBGene00002996	lin-7	30	18	60	9	4	44.4444	-15.5556
I 2296686	three_prime_utr	WBGene00021469	Y39G10AR.11	96	31	32.29	6	1	16.6667	-15.6233
V 950722	three_prime_utr	WBGene00005024	sqv-6	18	9	50	9	3	33.3333	-16.6667
I 1359430	three_prime_utr	WBGene00022363	Y92H12BL.1	24	12	50	12	4	33.3333	-16.6667
V 13135836	three_prime_utr	WBGene00007153	clec-41	9	6	66.67	8	4	50	-16.67
X 1012055	exon	WBGene00023069	rncs-1	55	27	49.09	31	10	32.2581	-16.8319
V 19927308	three_prime_utr	WBGene00013362	Y60A3A.14	11	5	45.45	7	2	28.5714	-16.8786
I 630914	three_prime_utr	WBGene00022029	Y65B4A.6	14	8	57.14	5	2	40	-17.14
V 19927343	three_prime_utr	WBGene00013362	Y60A3A.14	13	5	38.46	33	7	21.2121	-17.2479
X 1012179	exon	WBGene00023069	rncs-1	46	14	30.43	38	5	13.1579	-17.2721
I 629841	three_prime_utr	WBGene00022029	Y65B4A.6	32	11	34.38	12	2	16.6667	-17.7133
X 1012154	exon	WBGene00023069	rncs-1	49	40	81.63	63	40	63.4921	-18.1379
I 630994	three_prime_utr	WBGene00022029	Y65B4A.6	23	19	82.61	14	9	64.2857	-18.3243
I 10819667	three_prime_utr	WBGene00016458	C35E7.6	102	74	72.55	74	40	54.0541	-18.4959
I 1154878	three_prime_utr	WBGene00000165	aps-3	31	29	93.55	8	6	75	-18.55
V 3749612	three_prime_utr	WBGene00021482	Y39H10A.6	38	24	63.16	9	4	44.4444	-18.7156
III 12623248	three_prime_utr	WBGene00013735	Y111B2A.12	16	11	68.75	6	3	50	-18.75
I 629832	three_prime_utr	WBGene00022029	Y65B4A.6	27	16	59.26	15	6	40	-19.26
I 2296700	three_prime_utr	WBGene00021469	Y39G10AR.11	97	29	29.9	10	1	10	-19.9
I 3167623	three_prime_utr	WBGene00021828	Y54E10A.6	10	7	70	6	3	50	-20
III 12159719	three_prime_utr	WBGene00013544	Y75B8A.7	10	8	80	5	3	60	-20
I 1347129	intergenic	intergenic	#N/A	23	14	60.87	5	2	40	-20.87
X 1012162	exon	WBGene00023069	rncs-1	48	28	58.33	51	19	37.2549	-21.0751
V 950615	three_prime_utr	WBGene00005024	sqv-6	14	10	71.43	10	5	50	-21.43
II 13487363	three_prime_utr	WBGene00000113	alh-7	27	15	55.56	6	2	33.3333	-22.2267
V 13135855	three_prime_utr	WBGene00007153	clec-41	13	10	76.92	11	6	54.5455	-22.3745
V 4627723	three_prime_utr	WBGene00018812	sumv-2	25	15	60	8	3	37.5	-22.5
V 19927342	three_prime_utr	WBGene00013362	Y60A3A.14	13	9	69.23	30	14	46.6667	-22.5633
V 19927330	three_prime_utr	WBGene00013362	Y60A3A.14	12	11	91.67	22	15	68.1818	-23.4882
I 10819636	three_prime_utr	WBGene00016458	C35E7.6	104	50	48.08	74	18	24.3243	-23.7557
X 1011585	exon	WBGene00023069	rncs-1	56	30	53.57	68	20	29.4118	-24.1582
X 1012092	exon	WBGene00023069	rncs-1	54	45	83.33	39	23	58.9744	-24.3556
V 13135854	three_prime_utr	WBGene00007153	clec-41	13	8	61.54	11	4	36.3636	-25.1764
X 1012163	exon	WBGene00023069	rncs-1	48	34	70.83	55	25	45.4545	-25.3755
V 19927377	three_prime_utr	WBGene00013362	Y60A3A.14	15	9	60	31	10	32.2581	-27.7419
I 2076644	three_prime_utr	WBGene00021351	Y37E3.10	20	10	50	27	6	22.2222	-27.7778
V 19926933	three_prime_utr	WBGene00013362	Y60A3A.14	19	14	73.68	9	4	44.4444	-29.2356
I 3167580	three_prime_utr	WBGene00021828	Y54E10A.6	12	7	58.33	7	2	28.5714	-29.7586
I 10819642	three_prime_utr	WBGene00016458	C35E7.6	102	67	65.69	84	30	35.7143	-29.9757
I 1347216	intergenic	intergenic	#N/A	39	33	84.62	6	3	50	-34.62
V 950616	three_prime_utr	WBGene00005024	sqv-6	14	12	85.71	10	5	50	-35.71
I 3034547	three_prime_utr	WBGene00021841	Y54E10BR.2	14	12	85.71	10	5	50	-35.71
I 1155197	three_prime_utr	WBGene00000165	aps-3	46	37	80.43	44	18	40.9091	-39.5209
V 19927295	three_prime_utr	WBGene00013362	Y60A3A.14	9	6	66.67	20	5	25	-41.67
I 3034546	three_prime_utr	WBGene00021841	Y54E10BR.2	14	10	71.43	5	1	20	-51.43
