# Supplementary material for: Profiling neural editomes reveals a molecular mechanism to regulate RNA editing during development
Source: HighWire-hosted journal article supplement (doi:10.1101/gr.267575.120), 2020-12-18
Supplement: Supplemental_Table_S9.xlsx [file Supplemental_Table_S9.xlsx]

## Sheet: adr-1 editing combined sites
Supplemental Table 9: Quantification of editing in L1 and adult neural RNA-seq datasets from wild-type and adr-1(-) worms (related to Fig. 5E). In order to quantify the inhibitory effect of adr-1 in neural development, editing levels in RNA isolated from wild-type neural cells were compared with editing levels in RNA isolated from adr-1(-) neural cells of both developmental stages. In sum, 574 ed…
Chr position	feature	wbID	Gene Name	Total # of reads in WT L1	Total # of variant reads in WT L1	% variance in WT L1	Total # of reads in adr-1 L1	Total # of variant reads in adr-1 L1	% variance in adr-1 L1	L1 [adr-1(-) - WT]	Total # of reads in WT adults	Total # of variant reads in WT adults	% variance in WT adults	Total # of reads in adr-1(-) adults	Total # of variant reads in adr-1(-) adults	% variance in adr-1(-) adults	Adults [adr-1(-) - WT]
I 14855727	CDS	WBGene00000088	aex-5	198	14	7.07	110	3	2.73	-4.34	19	1	5.26316	0	0	#DIV/0!	#DIV/0!
I 1071729	CDS	WBGene00001745	gsa-1	70	1	1.43	34	2	5.88	4.45	17	13	76.4706	37	12	32.4324	-44.0382
V 6172875	CDS	WBGene00006436	ttn-1	5	2	40	3	1	33.33	-6.67	47	26	55.3191	37	22	59.4595	4.14031
V 12290025	CDS	WBGene00010097	srpa-68	64	2	3.12	16	1	6.25	3.13	6	2	33.3333	4	1	25	-8.33333
MtDNA 8429	CDS	WBGene00010964	ctc-1	98	97	98.98	37	36	97.3	-1.68	390	389	99.7436	559	553	98.9267	-0.816935
X 1011811	exon	WBGene00023069	rncs-1	46	11	23.91	16	1	6.25	-17.66	8	6	75	7	1	14.2857	-60.7143
X 1011804	exon	WBGene00023069	rncs-1	44	13	29.55	15	1	6.67	-22.88	7	3	42.8571	1	1	100	57.1429
X 1011762	exon	WBGene00023069	rncs-1	43	14	32.56	3	1	33.33	0.77	6	3	50	0	0	#DIV/0!	#DIV/0!
X 1011763	exon	WBGene00023069	rncs-1	42	36	85.71	4	1	25	-60.71	6	5	83.3333	1	1	100	16.6667
X 1012055	exon	WBGene00023069	rncs-1	55	27	49.09	1	1	100	50.91	31	10	32.2581	8	1	12.5	-19.7581
X 1012033	exon	WBGene00023069	rncs-1	56	12	21.43	2	1	50	28.57	17	7	41.1765	5	1	20	-21.1765
X 1012046	exon	WBGene00023069	rncs-1	56	47	83.93	1	1	100	16.07	28	22	78.5714	28	3	10.7143	-67.8571
X 1012045	exon	WBGene00023069	rncs-1	56	35	62.5	1	1	100	37.5	28	14	50	10	1	10	-40
X 1012023	exon	WBGene00023069	rncs-1	59	5	8.47	4	1	25	16.53	13	2	15.3846	0	0	#DIV/0!	#DIV/0!
X 1011585	exon	WBGene00023069	rncs-1	56	30	53.57	5	1	20	-33.57	68	20	29.4118	0	0	#DIV/0!	#DIV/0!
X 1012179	exon	WBGene00023069	rncs-1	46	14	30.43	3	2	66.67	36.24	38	5	13.1579	0	0	#DIV/0!	#DIV/0!
X 1012205	exon	WBGene00023069	rncs-1	64	13	20.31	3	2	66.67	46.36	75	11	14.6667	58	5	8.62069	-6.04598
X 1012092	exon	WBGene00023069	rncs-1	54	45	83.33	2	2	100	16.67	39	23	58.9744	51	7	13.7255	-45.2489
X 1012163	exon	WBGene00023069	rncs-1	48	34	70.83	3	2	66.67	-4.16	55	25	45.4545	31	3	9.67742	-35.7771
X 1012154	exon	WBGene00023069	rncs-1	49	40	81.63	3	2	66.67	-14.96	63	40	63.4921	90	10	11.1111	-52.381
X 1012159	exon	WBGene00023069	rncs-1	49	4	8.16	3	2	66.67	58.51	41	5	12.1951	0	0	#DIV/0!	#DIV/0!
X 1012162	exon	WBGene00023069	rncs-1	48	28	58.33	3	2	66.67	8.34	51	19	37.2549	0	0	#DIV/0!	#DIV/0!
V 17870645	five_prime_utr	WBGene00000813	csn-1	17	2	11.76	6	1	16.67	4.91	36	3	8.33333	34	2	5.88235	-2.45098
I 11603773	intergenic	intergenic	N/A	57	5	8.77	25	13	52	43.23	5	1	20	9	5	55.5556	35.5556
II 5724849	intergenic	intergenic	N/A	165	8	4.85	75	6	8	3.15	54	3	5.55556	10	1	10	4.44444
II 5724858	intergenic	intergenic	N/A	170	6	3.53	78	1	1.28	-2.25	25	1	4	0	0	#DIV/0!	#DIV/0!
II 5724871	intergenic	intergenic	N/A	172	7	4.07	77	1	1.3	-2.77	23	2	8.69565	0	0	#DIV/0!	#DIV/0!
II 5724885	intergenic	intergenic	N/A	172	5	2.91	80	3	3.75	0.84	69	5	7.24638	31	2	6.45161	-0.794764
II 5724886	intergenic	intergenic	N/A	173	8	4.62	80	4	5	0.38	69	5	7.24638	41	3	7.31707	0.0706964
II 5724906	intergenic	intergenic	N/A	180	8	4.44	82	3	3.66	-0.78	12	1	8.33333	12	1	8.33333	0
II 5724928	intergenic	intergenic	N/A	194	8	4.12	81	2	2.47	-1.65	29	3	10.3448	9	1	11.1111	0.766284
II 5724947	intergenic	intergenic	N/A	202	14	6.93	93	5	5.38	-1.55	28	2	7.14286	18	2	11.1111	3.96825
II 5725037	intergenic	intergenic	N/A	221	5	2.26	110	1	0.91	-1.35	29	1	3.44828	0	0	#DIV/0!	#DIV/0!
II 5725044	intergenic	intergenic	N/A	219	12	5.48	111	6	5.41	-0.07	28	1	3.57143	0	0	#DIV/0!	#DIV/0!
II 5725088	intergenic	intergenic	N/A	206	15	7.28	115	12	10.43	3.15	35	1	2.85714	0	0	#DIV/0!	#DIV/0!
II 5725139	intergenic	intergenic	N/A	203	5	2.46	129	11	8.53	6.07	40	1	2.5	7	2	28.5714	26.0714
II 5725217	intergenic	intergenic	N/A	190	5	2.63	149	1	0.67	-1.96	78	3	3.84615	19	2	10.5263	6.68016
II 5725240	intergenic	intergenic	N/A	183	4	2.19	152	4	2.63	0.44	20	1	5	50	5	10	5
II 5725241	intergenic	intergenic	N/A	182	5	2.75	153	4	2.61	-0.14	65	2	3.07692	50	5	10	6.92308
II 5725244	intergenic	intergenic	N/A	180	5	2.78	153	1	0.65	-2.13	65	2	3.07692	18	2	11.1111	8.03419
I 1347095	intergenic	intergenic	N/A	17	14	82.35	2	2	100	17.65	11	11	100	10	10	100	0
I 1347129	intergenic	intergenic	N/A	23	14	60.87	3	2	66.67	5.8	5	2	40	8	2	25	-15
I 1347136	intergenic	intergenic	N/A	24	18	75	4	3	75	0	8	7	87.5	11	5	45.4545	-42.0455
I 1347138	intergenic	intergenic	N/A	24	4	16.67	4	2	50	33.33	7	4	57.1429	10	5	50	-7.14286
I 1347228	intergenic	intergenic	N/A	43	19	44.19	4	3	75	30.81	9	6	66.6667	10	4	40	-26.6667
I 1347259	intergenic	intergenic	N/A	49	14	28.57	5	1	20	-8.57	10	5	50	0	0	#DIV/0!	#DIV/0!
I 1347605	intergenic	intergenic	N/A	51	33	64.71	9	5	55.56	-9.15	6	4	66.6667	4	2	50	-16.6667
I 1347683	intergenic	intergenic	N/A	27	21	77.78	3	2	66.67	-11.11	5	5	100	3	3	100	0
I 10819154	intergenic	intergenic	N/A	93	5	5.38	70	2	2.86	-2.52	10	1	10	0	0	#DIV/0!	#DIV/0!
I 10819271	intergenic	intergenic	N/A	109	15	13.76	72	1	1.39	-12.37	13	2	15.3846	26	3	11.5385	-3.84615
I 10819272	intergenic	intergenic	N/A	109	19	17.43	71	3	4.23	-13.2	21	6	28.5714	17	3	17.6471	-10.9244
I 10819277	intergenic	intergenic	N/A	107	8	7.48	73	2	2.74	-4.74	9	2	22.2222	21	3	14.2857	-7.93651
I 10819284	intergenic	intergenic	N/A	102	3	2.94	72	5	6.94	4	14	2	14.2857	10	2	20	5.71429
I 10819312	intergenic	intergenic	N/A	101	6	5.94	68	2	2.94	-3	17	5	29.4118	29	3	10.3448	-19.0669
I 10819313	intergenic	intergenic	N/A	101	6	5.94	68	3	4.41	-1.53	13	2	15.3846	21	4	19.0476	3.663
I 10819322	intergenic	intergenic	N/A	100	7	7	70	2	2.86	-4.14	10	1	10	18	1	5.55556	-4.44444
I 10819329	intergenic	intergenic	N/A	96	15	15.62	69	1	1.45	-14.17	21	5	23.8095	20	2	10	-13.8095
I 10819331	intergenic	intergenic	N/A	94	9	9.57	67	2	2.99	-6.58	7	2	28.5714	28	4	14.2857	-14.2857
I 10819341	intergenic	intergenic	N/A	91	15	16.48	68	5	7.35	-9.13	17	4	23.5294	22	4	18.1818	-5.34759
I 10819674	intergenic	intergenic	N/A	106	2	1.89	69	1	1.45	-0.44	23	3	13.0435	79	6	7.59494	-5.44854
I 10820285	intergenic	intergenic	N/A	97	13	13.4	44	3	6.82	-6.58	5	1	20	12	1	8.33333	-11.6667
I 10820459	intergenic	intergenic	N/A	97	6	6.19	46	3	6.52	0.33	11	1	9.09091	0	0	#DIV/0!	#DIV/0!
I 10820497	intergenic	intergenic	N/A	107	9	8.41	48	3	6.25	-2.16	14	1	7.14286	0	0	#DIV/0!	#DIV/0!
I 10820616	intergenic	intergenic	N/A	155	22	14.19	82	17	20.73	6.54	16	6	37.5	51	5	9.80392	-27.6961
III 11557725	intergenic	intergenic	N/A	5	3	60	1	1	100	40	7	7	100	0	0	#DIV/0!	#DIV/0!
II 5725312	intergenic	intergenic	N/A	202	1	0.5	142	1	0.7	0.2	16	3	18.75	0	0	#DIV/0!	#DIV/0!
I 1347145	intergenic	intergenic	N/A	25	2	8	4	1	25	17	8	5	62.5	3	2	66.6667	4.16667
I 10819628	intergenic	intergenic	N/A	102	2	1.96	59	1	1.69	-0.27	74	35	47.2973	111	34	30.6306	-16.6667
II 5724776	intron	WBGene00004267	rab-3	103	4	3.88	47	1	2.13	-1.75	27	1	3.7037	0	0	#DIV/0!	#DIV/0!
II 5724781	intron	WBGene00004267	rab-3	109	9	8.26	49	1	2.04	-6.22	48	2	4.16667	0	0	#DIV/0!	#DIV/0!
II 5724782	intron	WBGene00004267	rab-3	110	5	4.55	49	1	2.04	-2.51	27	1	3.7037	0	0	#DIV/0!	#DIV/0!
II 5724823	intron	WBGene00004267	rab-3	146	8	5.48	63	1	1.59	-3.89	28	1	3.57143	0	0	#DIV/0!	#DIV/0!
II 5725460	intron	WBGene00004267	rab-3	150	7	4.67	75	1	1.33	-3.34	9	1	11.1111	0	0	#DIV/0!	#DIV/0!
II 5725481	intron	WBGene00004267	rab-3	126	4	3.17	60	4	6.67	3.5	9	1	11.1111	0	0	#DIV/0!	#DIV/0!
II 5725490	intron	WBGene00004267	rab-3	115	8	6.96	58	6	10.34	3.38	7	1	14.2857	0	0	#DIV/0!	#DIV/0!
II 5725502	intron	WBGene00004267	rab-3	114	7	6.14	56	9	16.07	9.93	9	2	22.2222	0	0	#DIV/0!	#DIV/0!
II 5725504	intron	WBGene00004267	rab-3	116	6	5.17	54	3	5.56	0.39	6	1	16.6667	0	0	#DIV/0!	#DIV/0!
II 5725461	intron	WBGene00004267	rab-3	148	17	11.49	75	11	14.67	3.18	9	1	11.1111	0	0	#DIV/0!	#DIV/0!
II 5725441	intron	WBGene00004267	rab-3	165	17	10.3	90	9	10	-0.3	19	2	10.5263	0	0	#DIV/0!	#DIV/0!
II 5725440	intron	WBGene00004267	rab-3	165	11	6.67	90	9	10	3.33	16	3	18.75	0	0	#DIV/0!	#DIV/0!
II 5725417	intron	WBGene00004267	rab-3	174	26	14.94	112	19	16.96	2.02	23	2	8.69565	5	1	20	11.3043
II 5725418	intron	WBGene00004267	rab-3	175	22	12.57	110	5	4.55	-8.02	23	2	8.69565	10	2	20	11.3043
II 5725428	intron	WBGene00004267	rab-3	173	9	5.2	97	2	2.06	-3.14	18	2	11.1111	0	0	#DIV/0!	#DIV/0!
II 5725435	intron	WBGene00004267	rab-3	167	14	8.38	93	6	6.45	-1.93	19	2	10.5263	0	0	#DIV/0!	#DIV/0!
II 5724972	intron	WBGene00004267	rab-3	205	7	3.41	94	6	6.38	2.97	22	1	4.54545	0	0	#DIV/0!	#DIV/0!
II 5724836	intron	WBGene00004267	rab-3	160	9	5.62	72	3	4.17	-1.45	40	1	2.5	10	1	10	7.5
II 5724837	intron	WBGene00004267	rab-3	159	7	4.4	73	3	4.11	-0.29	39	1	2.5641	10	1	10	7.4359
II 5724840	intron	WBGene00004267	rab-3	162	8	4.94	72	2	2.78	-2.16	39	2	5.12821	10	1	10	4.87179
II 5724841	intron	WBGene00004267	rab-3	163	6	3.68	72	3	4.17	0.49	37	1	2.7027	10	1	10	7.2973
II 5724847	intron	WBGene00004267	rab-3	165	9	5.45	72	3	4.17	-1.28	39	1	2.5641	10	1	10	7.4359
II 5724866	intron	WBGene00004267	rab-3	175	5	2.86	77	3	3.9	1.04	27	1	3.7037	9	1	11.1111	7.40741
II 5724884	intron	WBGene00004267	rab-3	174	12	6.9	79	5	6.33	-0.57	25	1	4	0	0	#DIV/0!	#DIV/0!
II 5725262	intron	WBGene00004267	rab-3	170	6	3.53	149	1	0.67	-2.86	39	1	2.5641	0	0	#DIV/0!	#DIV/0!
II 5725138	intron	WBGene00004267	rab-3	202	11	5.45	130	1	0.77	-4.68	10	1	10	11	2	18.1818	8.18182
II 5725163	intron	WBGene00004267	rab-3	185	8	4.32	139	1	0.72	-3.6	54	1	1.85185	0	0	#DIV/0!	#DIV/0!
I 7428780	intron	WBGene00006752	unc-13	7	6	85.71	4	4	100	14.29	5	5	100	12	12	100	0
II 15105931	intron	WBGene00013167	Y53F4B.21	6	2	33.33	1	1	100	66.67	11	8	72.7273	18	16	88.8889	16.1616
II 15105965	intron	WBGene00013167	Y53F4B.21	5	3	60	2	1	50	-10	6	6	100	2	2	100	0
II 15105932	intron	WBGene00013167	Y53F4B.21	6	3	50	1	1	100	50	5	3	60	18	15	83.3333	23.3333
II 15105915	intron	WBGene00013167	Y53F4B.21	6	2	33.33	1	1	100	66.67	7	3	42.8571	18	4	22.2222	-20.6349
II 13486675	three_prime_utr	WBGene00000113	alh-7	21	14	66.67	6	6	100	33.33	13	12	92.3077	12	8	66.6667	-25.641
II 13486676	three_prime_utr	WBGene00000113	alh-7	21	6	28.57	6	2	33.33	4.76	12	4	33.3333	11	3	27.2727	-6.06061
II 13486678	three_prime_utr	WBGene00000113	alh-7	21	10	47.62	6	6	100	52.38	11	5	45.4545	15	11	73.3333	27.8788
II 13486717	three_prime_utr	WBGene00000113	alh-7	15	14	93.33	4	3	75	-18.33	7	7	100	9	4	44.4444	-55.5556
II 13486388	three_prime_utr	WBGene00000113	alh-7	44	12	27.27	7	3	42.86	15.59	5	4	80	16	8	50	-30
II 13486816	three_prime_utr	WBGene00000113	alh-7	20	19	95	2	1	50	-45	5	5	100	8	7	87.5	-12.5
II 13486727	three_prime_utr	WBGene00000113	alh-7	16	13	81.25	3	3	100	18.75	8	7	87.5	9	9	100	12.5
II 13486746	three_prime_utr	WBGene00000113	alh-7	20	6	30	3	1	33.33	3.33	5	1	20	8	2	25	5
II 13485922	three_prime_utr	WBGene00000113	alh-7	25	13	52	3	1	33.33	-18.67	12	9	75	1	1	100	25
II 13485923	three_prime_utr	WBGene00000113	alh-7	25	17	68	3	1	33.33	-34.67	16	14	87.5	1	1	100	12.5
II 13485939	three_prime_utr	WBGene00000113	alh-7	27	24	88.89	3	3	100	11.11	13	13	100	5	5	100	0
II 13485940	three_prime_utr	WBGene00000113	alh-7	28	17	60.71	3	3	100	39.29	13	9	69.2308	5	5	100	30.7692
II 13485951	three_prime_utr	WBGene00000113	alh-7	24	3	12.5	3	2	66.67	54.17	13	7	53.8462	6	4	66.6667	12.8205
II 13485956	three_prime_utr	WBGene00000113	alh-7	25	12	48	3	1	33.33	-14.67	15	8	53.3333	3	3	100	46.6667
II 13485959	three_prime_utr	WBGene00000113	alh-7	26	4	15.38	3	1	33.33	17.95	6	1	16.6667	0	0	#DIV/0!	#DIV/0!
II 13485948	three_prime_utr	WBGene00000113	alh-7	26	2	7.69	3	1	33.33	25.64	7	4	57.1429	0	0	#DIV/0!	#DIV/0!
II 13487386	three_prime_utr	WBGene00000113	alh-7	32	14	43.75	8	3	37.5	-6.25	6	2	33.3333	14	4	28.5714	-4.7619
II 13487364	three_prime_utr	WBGene00000113	alh-7	27	14	51.85	6	4	66.67	14.82	6	3	50	14	3	21.4286	-28.5714
II 13487402	three_prime_utr	WBGene00000113	alh-7	36	6	16.67	8	4	50	33.33	12	4	33.3333	10	4	40	6.66667
II 13487363	three_prime_utr	WBGene00000113	alh-7	27	15	55.56	6	5	83.33	27.77	6	2	33.3333	9	2	22.2222	-11.1111
I 1155283	three_prime_utr	WBGene00000165	aps-3	38	16	42.11	18	4	22.22	-19.89	72	28	38.8889	71	24	33.8028	-5.08607
I 1155290	three_prime_utr	WBGene00000165	aps-3	38	11	28.95	18	4	22.22	-6.73	57	20	35.0877	50	5	10	-25.0877
I 1155289	three_prime_utr	WBGene00000165	aps-3	37	34	91.89	18	15	83.33	-8.56	68	67	98.5294	68	47	69.1176	-29.4118
I 1155312	three_prime_utr	WBGene00000165	aps-3	45	36	80	22	16	72.73	-7.27	54	44	81.4815	50	42	84	2.51852
I 1154822	three_prime_utr	WBGene00000165	aps-3	40	22	55	10	7	70	15	24	18	75	59	42	71.1864	-3.81356
I 1154823	three_prime_utr	WBGene00000165	aps-3	40	25	62.5	10	8	80	17.5	24	21	87.5	59	45	76.2712	-11.2288
I 1154846	three_prime_utr	WBGene00000165	aps-3	37	8	21.62	9	3	33.33	11.71	13	3	23.0769	44	11	25	1.92308
I 1154840	three_prime_utr	WBGene00000165	aps-3	36	19	52.78	10	4	40	-12.78	18	7	38.8889	54	27	50	11.1111
I 1154746	three_prime_utr	WBGene00000165	aps-3	57	14	24.56	12	3	25	0.44	43	16	37.2093	94	12	12.766	-24.4433
I 1154795	three_prime_utr	WBGene00000165	aps-3	48	10	20.83	12	1	8.33	-12.5	37	10	27.027	17	2	11.7647	-15.2623
I 1154873	three_prime_utr	WBGene00000165	aps-3	33	8	24.24	7	1	14.29	-9.95	8	3	37.5	39	14	35.8974	-1.60256
I 1154878	three_prime_utr	WBGene00000165	aps-3	31	29	93.55	7	2	28.57	-64.98	8	6	75	34	10	29.4118	-45.5882
I 1154863	three_prime_utr	WBGene00000165	aps-3	32	31	96.88	7	7	100	3.12	14	14	100	48	46	95.8333	-4.16667
I 1154858	three_prime_utr	WBGene00000165	aps-3	32	3	9.38	7	1	14.29	4.91	9	4	44.4444	35	7	20	-24.4444
I 1154725	three_prime_utr	WBGene00000165	aps-3	55	8	14.55	13	3	23.08	8.53	47	10	21.2766	120	17	14.1667	-7.10993
I 1154645	three_prime_utr	WBGene00000165	aps-3	56	38	67.86	16	6	37.5	-30.36	52	44	84.6154	90	51	56.6667	-27.9487
I 1154654	three_prime_utr	WBGene00000165	aps-3	59	10	16.95	16	2	12.5	-4.45	41	4	9.7561	65	6	9.23077	-0.525328
I 1154651	three_prime_utr	WBGene00000165	aps-3	57	22	38.6	16	6	37.5	-1.1	55	18	32.7273	99	37	37.3737	4.64646
I 1154650	three_prime_utr	WBGene00000165	aps-3	57	32	56.14	16	14	87.5	31.36	53	43	81.1321	94	59	62.766	-18.3661
I 1154606	three_prime_utr	WBGene00000165	aps-3	43	30	69.77	14	9	64.29	-5.48	53	41	77.3585	83	54	65.0602	-12.2982
I 1154603	three_prime_utr	WBGene00000165	aps-3	42	16	38.1	14	5	35.71	-2.39	51	28	54.902	71	18	25.3521	-29.5498
I 1154711	three_prime_utr	WBGene00000165	aps-3	55	29	52.73	13	2	15.38	-37.35	44	17	38.6364	122	7	5.7377	-32.8987
I 1154709	three_prime_utr	WBGene00000165	aps-3	55	46	83.64	13	12	92.31	8.67	44	41	93.1818	120	113	94.1667	0.984848
I 1154708	three_prime_utr	WBGene00000165	aps-3	55	42	76.36	14	10	71.43	-4.93	44	32	72.7273	120	103	85.8333	13.1061
I 1154712	three_prime_utr	WBGene00000165	aps-3	55	53	96.36	13	12	92.31	-4.05	44	43	97.7273	122	118	96.7213	-1.00596
I 1154671	three_prime_utr	WBGene00000165	aps-3	59	13	22.03	18	1	5.56	-16.47	37	12	32.4324	92	9	9.78261	-22.6498
I 1154703	three_prime_utr	WBGene00000165	aps-3	62	5	8.06	16	2	12.5	4.44	35	5	14.2857	44	5	11.3636	-2.92208
I 1154660	three_prime_utr	WBGene00000165	aps-3	58	12	20.69	16	1	6.25	-14.44	59	21	35.5932	103	11	10.6796	-24.9136
I 1154674	three_prime_utr	WBGene00000165	aps-3	56	10	17.86	17	4	23.53	5.67	45	15	33.3333	129	22	17.0543	-16.2791
I 1154702	three_prime_utr	WBGene00000165	aps-3	61	5	8.2	16	1	6.25	-1.95	53	10	18.8679	18	1	5.55556	-13.3124
I 1155168	three_prime_utr	WBGene00000165	aps-3	52	12	23.08	9	1	11.11	-11.97	31	14	45.1613	95	24	25.2632	-19.8981
I 1155131	three_prime_utr	WBGene00000165	aps-3	62	11	17.74	11	1	9.09	-8.65	47	17	36.1702	107	38	35.514	-0.656194
I 1155134	three_prime_utr	WBGene00000165	aps-3	62	13	20.97	11	4	36.36	15.39	45	9	20	100	37	37	17
I 1155135	three_prime_utr	WBGene00000165	aps-3	63	18	28.57	12	5	41.67	13.1	48	20	41.6667	107	47	43.9252	2.25857
I 1155173	three_prime_utr	WBGene00000165	aps-3	47	30	63.83	7	3	42.86	-20.97	35	24	68.5714	88	49	55.6818	-12.8896
I 1155276	three_prime_utr	WBGene00000165	aps-3	36	4	11.11	14	2	14.29	3.18	71	12	16.9014	59	9	15.2542	-1.64717
I 1155272	three_prime_utr	WBGene00000165	aps-3	39	15	38.46	14	6	42.86	4.4	74	27	36.4865	73	24	32.8767	-3.60977
I 1155210	three_prime_utr	WBGene00000165	aps-3	47	11	23.4	9	2	22.22	-1.18	28	4	14.2857	39	7	17.9487	3.663
I 1155207	three_prime_utr	WBGene00000165	aps-3	48	5	10.42	9	1	11.11	0.69	36	7	19.4444	43	6	13.9535	-5.49096
I 1155174	three_prime_utr	WBGene00000165	aps-3	47	44	93.62	7	6	85.71	-7.91	35	35	100	82	82	100	0
I 1155198	three_prime_utr	WBGene00000165	aps-3	46	41	89.13	9	4	44.44	-44.69	47	42	89.3617	78	33	42.3077	-47.054
I 1155197	three_prime_utr	WBGene00000165	aps-3	46	37	80.43	9	2	22.22	-58.21	44	18	40.9091	83	7	8.43373	-32.4754
I 1155046	three_prime_utr	WBGene00000165	aps-3	29	22	75.86	6	4	66.67	-9.19	18	16	88.8889	28	22	78.5714	-10.3175
I 1155039	three_prime_utr	WBGene00000165	aps-3	27	21	77.78	5	4	80	2.22	17	12	70.5882	21	17	80.9524	10.3641
I 1155055	three_prime_utr	WBGene00000165	aps-3	31	25	80.65	6	2	33.33	-47.32	22	18	81.8182	21	4	19.0476	-62.7706
I 1154997	three_prime_utr	WBGene00000165	aps-3	13	12	92.31	1	1	100	7.69	5	5	100	7	7	100	0
I 1154996	three_prime_utr	WBGene00000165	aps-3	13	10	76.92	1	1	100	23.08	5	4	80	5	2	40	-40
I 1155109	three_prime_utr	WBGene00000165	aps-3	57	20	35.09	10	5	50	14.91	42	23	54.7619	73	24	32.8767	-21.8852
I 1155080	three_prime_utr	WBGene00000165	aps-3	43	30	69.77	8	5	62.5	-7.27	31	22	70.9677	43	40	93.0233	22.0555
I 1155079	three_prime_utr	WBGene00000165	aps-3	43	6	13.95	8	2	25	11.05	30	6	20	19	2	10.5263	-9.47368
I 1155086	three_prime_utr	WBGene00000165	aps-3	48	8	16.67	8	2	25	8.33	34	10	29.4118	42	6	14.2857	-15.1261
I 1155104	three_prime_utr	WBGene00000165	aps-3	57	3	5.26	10	2	20	14.74	32	5	15.625	30	6	20	4.375
I 1154656	three_prime_utr	WBGene00000165	aps-3	59	2	3.39	16	1	6.25	2.86	60	9	15	83	6	7.22892	-7.77108
II 14347010	three_prime_utr	WBGene00002996	lin-7	28	4	14.29	12	2	16.67	2.38	6	2	33.3333	12	2	16.6667	-16.6667
II 14346992	three_prime_utr	WBGene00002996	lin-7	27	11	40.74	10	2	20	-20.74	9	4	44.4444	21	3	14.2857	-30.1587
II 14347028	three_prime_utr	WBGene00002996	lin-7	30	19	63.33	14	1	7.14	-56.19	8	7	87.5	15	4	26.6667	-60.8333
II 14347038	three_prime_utr	WBGene00002996	lin-7	34	16	47.06	15	3	20	-27.06	9	7	77.7778	22	9	40.9091	-36.8687
V 950652	three_prime_utr	WBGene00005024	sqv-6	11	6	54.55	1	1	100	45.45	14	8	57.1429	6	3	50	-7.14286
V 951022	three_prime_utr	WBGene00005024	sqv-6	11	4	36.36	2	1	50	13.64	9	7	77.7778	5	5	100	22.2222
I 12749141	three_prime_utr	WBGene00006700	uba-2	17	1	5.88	3	2	66.67	60.79	6	3	50	20	15	75	25
III 13283119	three_prime_utr	WBGene00006798	unc-64	27	12	44.44	9	2	22.22	-22.22	6	5	83.3333	7	2	28.5714	-54.7619
III 13283036	three_prime_utr	WBGene00006798	unc-64	38	7	18.42	17	2	11.76	-6.66	6	4	66.6667	0	0	#DIV/0!	#DIV/0!
III 13283035	three_prime_utr	WBGene00006798	unc-64	38	8	21.05	17	2	11.76	-9.29	6	4	66.6667	4	1	25	-41.6667
I 11924696	three_prime_utr	WBGene00006958	wve-1	26	6	23.08	4	2	50	26.92	10	2	20	32	11	34.375	14.375
I 11924698	three_prime_utr	WBGene00006958	wve-1	26	18	69.23	4	3	75	5.77	10	8	80	31	26	83.871	3.87097
I 11924699	three_prime_utr	WBGene00006958	wve-1	26	3	11.54	4	1	25	13.46	10	4	40	20	6	30	-10
V 20251272	three_prime_utr	WBGene00007017	mdt-17	8	5	62.5	2	2	100	37.5	5	4	80	21	17	80.9524	0.952381
V 13135043	three_prime_utr	WBGene00007153	clec-41	15	5	33.33	2	1	50	16.67	5	2	40	31	5	16.129	-23.871
V 13135853	three_prime_utr	WBGene00007153	clec-41	13	6	46.15	4	1	25	-21.15	11	4	36.3636	17	4	23.5294	-12.8342
V 13135854	three_prime_utr	WBGene00007153	clec-41	13	8	61.54	4	3	75	13.46	11	4	36.3636	17	9	52.9412	16.5775
V 13135078	three_prime_utr	WBGene00007153	clec-41	14	12	85.71	2	1	50	-35.71	5	5	100	20	20	100	0
V 13135818	three_prime_utr	WBGene00007153	clec-41	8	7	87.5	4	2	50	-37.5	5	5	100	6	5	83.3333	-16.6667
V 13135915	three_prime_utr	WBGene00007153	clec-41	26	10	38.46	7	1	14.29	-24.17	24	8	33.3333	24	2	8.33333	-25
III 9513199	three_prime_utr	WBGene00010131	F55H2.5	65	4	6.15	27	1	3.7	-2.45	7	1	14.2857	5	1	20	5.71429
II 10844224	three_prime_utr	WBGene00010910	M106.2	36	21	58.33	7	1	14.29	-44.04	7	3	42.8571	10	3	30	-12.8571
V 13037223	three_prime_utr	WBGene00012337	scyl-1	15	12	80	7	2	28.57	-51.43	6	6	100	4	3	75	-25
V 13037227	three_prime_utr	WBGene00012337	scyl-1	15	5	33.33	7	5	71.43	38.1	6	4	66.6667	6	6	100	33.3333
V 13037228	three_prime_utr	WBGene00012337	scyl-1	15	9	60	7	6	85.71	25.71	7	5	71.4286	6	6	100	28.5714
V 13037212	three_prime_utr	WBGene00012337	scyl-1	17	5	29.41	7	1	14.29	-15.12	6	4	66.6667	3	3	100	33.3333
V 13037250	three_prime_utr	WBGene00012337	scyl-1	16	6	37.5	7	4	57.14	19.64	5	4	80	5	4	80	0
V 13037098	three_prime_utr	WBGene00012337	scyl-1	59	6	10.17	10	7	70	59.83	10	3	30	17	12	70.5882	40.5882
V 13037089	three_prime_utr	WBGene00012337	scyl-1	60	25	41.67	11	3	27.27	-14.4	13	8	61.5385	16	11	68.75	7.21154
V 13037104	three_prime_utr	WBGene00012337	scyl-1	56	49	87.5	10	10	100	12.5	12	11	91.6667	15	15	100	8.33333
V 13037113	three_prime_utr	WBGene00012337	scyl-1	52	38	73.08	9	7	77.78	4.7	9	9	100	11	10	90.9091	-9.09091
V 13037084	three_prime_utr	WBGene00012337	scyl-1	60	7	11.67	11	3	27.27	15.6	15	7	46.6667	18	10	55.5556	8.88889
V 13037088	three_prime_utr	WBGene00012337	scyl-1	60	6	10	11	3	27.27	17.27	12	3	25	0	0	#DIV/0!	#DIV/0!
V 19926917	three_prime_utr	WBGene00013362	algn-7	19	6	31.58	6	1	16.67	-14.91	11	8	72.7273	31	4	12.9032	-59.824
V 19926933	three_prime_utr	WBGene00013362	algn-7	19	14	73.68	4	3	75	1.32	9	4	44.4444	33	15	45.4545	1.0101
V 19927330	three_prime_utr	WBGene00013362	algn-7	12	11	91.67	2	1	50	-41.67	22	15	68.1818	39	32	82.0513	13.8695
V 19927403	three_prime_utr	WBGene00013362	algn-7	17	16	94.12	5	4	80	-14.12	33	29	87.8788	45	29	64.4444	-23.4343
V 19927414	three_prime_utr	WBGene00013362	algn-7	16	4	25	5	4	80	55	25	16	64	41	20	48.7805	-15.2195
V 19927417	three_prime_utr	WBGene00013362	algn-7	15	7	46.67	5	3	60	13.33	28	15	53.5714	41	32	78.0488	24.4774
V 19927446	three_prime_utr	WBGene00013362	algn-7	10	3	30	5	1	20	-10	7	3	42.8571	34	5	14.7059	-28.1513
V 19927833	three_prime_utr	WBGene00013362	algn-7	13	6	46.15	2	1	50	3.85	10	9	90	25	15	60	-30
IV 13408853	three_prime_utr	WBGene00013382	gcl-1	31	14	45.16	6	1	16.67	-28.49	10	6	60	6	1	16.6667	-43.3333
IV 13408852	three_prime_utr	WBGene00013382	gcl-1	31	13	41.94	6	3	50	8.06	9	6	66.6667	6	1	16.6667	-50
IV 13408850	three_prime_utr	WBGene00013382	gcl-1	31	3	9.68	6	1	16.67	6.99	9	4	44.4444	7	2	28.5714	-15.873
IV 13408932	three_prime_utr	WBGene00013382	gcl-1	40	35	87.5	7	2	28.57	-58.93	8	7	87.5	10	5	50	-37.5
IV 13408931	three_prime_utr	WBGene00013382	gcl-1	41	26	63.41	7	2	28.57	-34.84	7	5	71.4286	10	4	40	-31.4286
IV 13408928	three_prime_utr	WBGene00013382	gcl-1	42	4	9.52	7	3	42.86	33.34	7	3	42.8571	6	2	33.3333	-9.52381
IV 13408861	three_prime_utr	WBGene00013382	gcl-1	32	12	37.5	6	3	50	12.5	10	8	80	10	4	40	-40
IV 13408919	three_prime_utr	WBGene00013382	gcl-1	43	7	16.28	8	4	50	33.72	7	3	42.8571	14	4	28.5714	-14.2857
III 12159719	three_prime_utr	WBGene00013544	Y75B8A.7	10	8	80	2	1	50	-30	5	3	60	9	2	22.2222	-37.7778
III 12171075	three_prime_utr	WBGene00013545	Y75B8A.8	20	11	55	2	2	100	45	9	9	100	29	25	86.2069	-13.7931
III 12171074	three_prime_utr	WBGene00013545	Y75B8A.8	20	4	20	2	2	100	80	6	4	66.6667	23	5	21.7391	-44.9275
III 12623321	three_prime_utr	WBGene00013735	Y111B2A.12	20	9	45	1	1	100	55	8	8	100	17	14	82.3529	-17.6471
III 12623337	three_prime_utr	WBGene00013735	Y111B2A.12	22	18	81.82	1	1	100	18.18	8	8	100	15	9	60	-40
III 12710717	three_prime_utr	WBGene00013742	Y111B2A.24	14	5	35.71	2	1	50	14.29	5	4	80	0	0	#DIV/0!	#DIV/0!
I 10639333	three_prime_utr	WBGene00015235	cdc-26	37	10	27.03	5	2	40	12.97	12	2	16.6667	5	2	40	23.3333
I 10819971	three_prime_utr	WBGene00016458	C35E7.6	94	11	11.7	60	4	6.67	-5.03	48	8	16.6667	92	14	15.2174	-1.44928
I 10819994	three_prime_utr	WBGene00016458	C35E7.6	75	11	14.67	49	14	28.57	13.9	61	13	21.3115	86	43	50	28.6885
I 10819998	three_prime_utr	WBGene00016458	C35E7.6	73	27	36.99	48	5	10.42	-26.57	61	29	47.541	78	7	8.97436	-38.5666
I 10820008	three_prime_utr	WBGene00016458	C35E7.6	66	28	42.42	39	12	30.77	-11.65	58	43	74.1379	79	37	46.8354	-27.3025
I 10820009	three_prime_utr	WBGene00016458	C35E7.6	64	39	60.94	39	32	82.05	21.11	58	49	84.4828	78	68	87.1795	2.69673
I 10820012	three_prime_utr	WBGene00016458	C35E7.6	64	6	9.38	38	6	15.79	6.41	59	13	22.0339	65	16	24.6154	2.58149
I 10820016	three_prime_utr	WBGene00016458	C35E7.6	65	7	10.77	36	11	30.56	19.79	47	14	29.7872	77	31	40.2597	10.4725
I 10820035	three_prime_utr	WBGene00016458	C35E7.6	48	11	22.92	22	1	4.55	-18.37	42	17	40.4762	50	20	40	-0.47619
I 10820036	three_prime_utr	WBGene00016458	C35E7.6	48	21	43.75	21	12	57.14	13.39	42	30	71.4286	50	36	72	0.571429
I 10820037	three_prime_utr	WBGene00016458	C35E7.6	48	3	6.25	21	12	57.14	50.89	13	2	15.3846	50	22	44	28.6154
I 10820043	three_prime_utr	WBGene00016458	C35E7.6	42	5	11.9	20	2	10	-1.9	26	3	11.5385	27	5	18.5185	6.98006
I 10820050	three_prime_utr	WBGene00016458	C35E7.6	39	5	12.82	16	4	25	12.18	32	11	34.375	43	14	32.5581	-1.81686
I 10820051	three_prime_utr	WBGene00016458	C35E7.6	38	8	21.05	16	1	6.25	-14.8	25	6	24	17	2	11.7647	-12.2353
I 10820052	three_prime_utr	WBGene00016458	C35E7.6	37	3	8.11	16	1	6.25	-1.86	15	3	20	0	0	#DIV/0!	#DIV/0!
I 10820086	three_prime_utr	WBGene00016458	C35E7.6	36	17	47.22	26	16	61.54	14.32	18	12	66.6667	33	27	81.8182	15.1515
I 10820093	three_prime_utr	WBGene00016458	C35E7.6	42	4	9.52	32	8	25	15.48	23	10	43.4783	30	16	53.3333	9.85507
I 10820094	three_prime_utr	WBGene00016458	C35E7.6	45	3	6.67	32	1	3.12	-3.55	9	2	22.2222	12	1	8.33333	-13.8889
I 10820113	three_prime_utr	WBGene00016458	C35E7.6	59	8	13.56	39	2	5.13	-8.43	28	8	28.5714	15	3	20	-8.57143
I 10820114	three_prime_utr	WBGene00016458	C35E7.6	60	14	23.33	39	3	7.69	-15.64	29	10	34.4828	17	2	11.7647	-22.7181
I 10820128	three_prime_utr	WBGene00016458	C35E7.6	68	5	7.35	46	1	2.17	-5.18	29	7	24.1379	31	7	22.5806	-1.55729
I 10820137	three_prime_utr	WBGene00016458	C35E7.6	68	49	72.06	45	13	28.89	-43.17	39	31	79.4872	43	27	62.7907	-16.6965
I 10820138	three_prime_utr	WBGene00016458	C35E7.6	68	54	79.41	45	40	88.89	9.48	38	32	84.2105	43	40	93.0233	8.81273
I 10820143	three_prime_utr	WBGene00016458	C35E7.6	69	17	24.64	45	13	28.89	4.25	41	15	36.5854	36	12	33.3333	-3.25203
I 10820152	three_prime_utr	WBGene00016458	C35E7.6	74	10	13.51	47	14	29.79	16.28	37	11	29.7297	50	30	60	30.2703
I 10820169	three_prime_utr	WBGene00016458	C35E7.6	89	11	12.36	51	6	11.76	-0.6	37	14	37.8378	73	10	13.6986	-24.1392
I 10820175	three_prime_utr	WBGene00016458	C35E7.6	89	15	16.85	52	12	23.08	6.23	41	10	24.3902	73	31	42.4658	18.0755
I 10820181	three_prime_utr	WBGene00016458	C35E7.6	88	46	52.27	52	14	26.92	-25.35	43	22	51.1628	77	36	46.7532	-4.40954
I 10820182	three_prime_utr	WBGene00016458	C35E7.6	88	24	27.27	52	11	21.15	-6.12	44	22	50	71	28	39.4366	-10.5634
I 10820188	three_prime_utr	WBGene00016458	C35E7.6	90	8	8.89	52	9	17.31	8.42	52	9	17.3077	80	23	28.75	11.4423
I 10820189	three_prime_utr	WBGene00016458	C35E7.6	89	21	23.6	51	13	25.49	1.89	47	16	34.0426	84	37	44.0476	10.0051
I 10820191	three_prime_utr	WBGene00016458	C35E7.6	88	21	23.86	50	11	22	-1.86	43	10	23.2558	85	24	28.2353	4.97948
I 10820192	three_prime_utr	WBGene00016458	C35E7.6	87	17	19.54	49	4	8.16	-11.38	57	21	36.8421	73	12	16.4384	-20.4037
I 10820197	three_prime_utr	WBGene00016458	C35E7.6	97	10	10.31	53	5	9.43	-0.88	30	4	13.3333	62	11	17.7419	4.4086
I 10820208	three_prime_utr	WBGene00016458	C35E7.6	98	35	35.71	53	25	47.17	11.46	48	24	50	74	56	75.6757	25.6757
I 10820209	three_prime_utr	WBGene00016458	C35E7.6	98	8	8.16	53	23	43.4	35.24	48	12	25	74	33	44.5946	19.5946
I 10820210	three_prime_utr	WBGene00016458	C35E7.6	98	7	7.14	54	5	9.26	2.12	27	6	22.2222	75	22	29.3333	7.11111
I 10820214	three_prime_utr	WBGene00016458	C35E7.6	98	8	8.16	56	7	12.5	4.34	21	2	9.52381	71	17	23.9437	14.4199
I 10820215	three_prime_utr	WBGene00016458	C35E7.6	96	65	67.71	55	33	60	-7.71	45	36	80	77	60	77.9221	-2.07792
I 10820229	three_prime_utr	WBGene00016458	C35E7.6	99	51	51.52	60	24	40	-11.52	45	24	53.3333	82	52	63.4146	10.0813
I 10820251	three_prime_utr	WBGene00016458	C35E7.6	94	37	39.36	47	7	14.89	-24.47	32	23	71.875	59	22	37.2881	-34.5869
I 10820252	three_prime_utr	WBGene00016458	C35E7.6	94	18	19.15	47	7	14.89	-4.26	30	13	43.3333	59	16	27.1186	-16.2147
I 10820253	three_prime_utr	WBGene00016458	C35E7.6	92	9	9.78	46	2	4.35	-5.43	16	3	18.75	24	1	4.16667	-14.5833
I 10820261	three_prime_utr	WBGene00016458	C35E7.6	84	24	28.57	41	7	17.07	-11.5	27	17	62.963	47	17	36.1702	-26.7928
I 10820262	three_prime_utr	WBGene00016458	C35E7.6	84	4	4.76	41	2	4.88	0.12	10	3	30	30	3	10	-20
I 10820264	three_prime_utr	WBGene00016458	C35E7.6	83	12	14.46	40	9	22.5	8.04	26	11	42.3077	55	23	41.8182	-0.48951
I 10820274	three_prime_utr	WBGene00016458	C35E7.6	92	9	9.78	39	3	7.69	-2.09	6	2	33.3333	17	3	17.6471	-15.6863
I 10820275	three_prime_utr	WBGene00016458	C35E7.6	91	6	6.59	40	1	2.5	-4.09	6	2	33.3333	0	0	#DIV/0!	#DIV/0!
I 10820286	three_prime_utr	WBGene00016458	C35E7.6	96	20	20.83	43	10	23.26	2.43	5	1	20	44	16	36.3636	16.3636
I 10820287	three_prime_utr	WBGene00016458	C35E7.6	97	30	30.93	44	12	27.27	-3.66	8	3	37.5	41	10	24.3902	-13.1098
I 10820292	three_prime_utr	WBGene00016458	C35E7.6	97	48	49.48	46	23	50	0.52	11	6	54.5455	46	32	69.5652	15.0198
I 10820312	three_prime_utr	WBGene00016458	C35E7.6	90	24	26.67	45	1	2.22	-24.45	7	3	42.8571	26	7	26.9231	-15.9341
I 10820313	three_prime_utr	WBGene00016458	C35E7.6	89	46	51.69	44	3	6.82	-44.87	7	6	85.7143	36	9	25	-60.7143
I 10820314	three_prime_utr	WBGene00016458	C35E7.6	88	60	68.18	43	8	18.6	-49.58	8	7	87.5	26	7	26.9231	-60.5769
I 10820315	three_prime_utr	WBGene00016458	C35E7.6	88	55	62.5	43	5	11.63	-50.87	10	7	70	20	4	20	-50
I 10820327	three_prime_utr	WBGene00016458	C35E7.6	92	35	38.04	41	25	60.98	22.94	9	4	44.4444	28	17	60.7143	16.2698
I 10820333	three_prime_utr	WBGene00016458	C35E7.6	97	8	8.25	40	7	17.5	9.25	8	2	25	30	14	46.6667	21.6667
I 10820344	three_prime_utr	WBGene00016458	C35E7.6	93	6	6.45	42	2	4.76	-1.69	7	2	28.5714	17	5	29.4118	0.840336
I 10820349	three_prime_utr	WBGene00016458	C35E7.6	88	41	46.59	39	12	30.77	-15.82	7	4	57.1429	23	10	43.4783	-13.6646
I 10820350	three_prime_utr	WBGene00016458	C35E7.6	88	69	78.41	38	31	81.58	3.17	7	5	71.4286	21	18	85.7143	14.2857
I 10820361	three_prime_utr	WBGene00016458	C35E7.6	89	33	37.08	39	10	25.64	-11.44	8	2	25	20	6	30	5
I 10820364	three_prime_utr	WBGene00016458	C35E7.6	90	11	12.22	38	2	5.26	-6.96	15	6	40	7	3	42.8571	2.85714
I 10820368	three_prime_utr	WBGene00016458	C35E7.6	90	9	10	36	1	2.78	-7.22	8	2	25	16	2	12.5	-12.5
I 10820377	three_prime_utr	WBGene00016458	C35E7.6	90	8	8.89	28	3	10.71	1.82	23	6	26.087	22	8	36.3636	10.2767
I 10820378	three_prime_utr	WBGene00016458	C35E7.6	91	14	15.38	29	7	24.14	8.76	23	8	34.7826	20	7	35	0.217391
I 10820385	three_prime_utr	WBGene00016458	C35E7.6	94	5	5.32	29	1	3.45	-1.87	16	5	31.25	13	1	7.69231	-23.5577
I 10820389	three_prime_utr	WBGene00016458	C35E7.6	91	11	12.09	29	2	6.9	-5.19	19	4	21.0526	27	4	14.8148	-6.23782
I 10820404	three_prime_utr	WBGene00016458	C35E7.6	94	5	5.32	27	1	3.7	-1.62	23	3	13.0435	28	3	10.7143	-2.32919
I 10820406	three_prime_utr	WBGene00016458	C35E7.6	92	10	10.87	26	4	15.38	4.51	39	9	23.0769	52	15	28.8462	5.76923
I 10820412	three_prime_utr	WBGene00016458	C35E7.6	94	25	26.6	26	7	26.92	0.32	43	20	46.5116	55	42	76.3636	29.852
I 10820413	three_prime_utr	WBGene00016458	C35E7.6	93	12	12.9	25	6	24	11.1	43	16	37.2093	57	33	57.8947	20.6854
I 10820416	three_prime_utr	WBGene00016458	C35E7.6	92	4	4.35	25	2	8	3.65	12	1	8.33333	27	3	11.1111	2.77778
I 10820418	three_prime_utr	WBGene00016458	C35E7.6	90	59	65.56	25	8	32	-33.56	47	39	82.9787	61	38	62.2951	-20.6836
I 10820419	three_prime_utr	WBGene00016458	C35E7.6	89	53	59.55	24	8	33.33	-26.22	47	33	70.2128	59	33	55.9322	-14.2806
I 10820428	three_prime_utr	WBGene00016458	C35E7.6	92	42	45.65	21	3	14.29	-31.36	49	31	63.2653	64	23	35.9375	-27.3278
I 10820453	three_prime_utr	WBGene00016458	C35E7.6	95	11	11.58	12	1	8.33	-3.25	23	2	8.69565	54	7	12.963	4.26731
I 10820455	three_prime_utr	WBGene00016458	C35E7.6	97	4	4.12	12	3	25	20.88	48	11	22.9167	21	1	4.7619	-18.1548
I 10820462	three_prime_utr	WBGene00016458	C35E7.6	99	11	11.11	49	2	4.08	-7.03	32	7	21.875	72	8	11.1111	-10.7639
I 10820473	three_prime_utr	WBGene00016458	C35E7.6	103	8	7.77	52	1	1.92	-5.85	30	5	16.6667	0	0	#DIV/0!	#DIV/0!
I 10820475	three_prime_utr	WBGene00016458	C35E7.6	99	32	32.32	52	3	5.77	-26.55	50	31	62	83	12	14.4578	-47.5422
I 10820476	three_prime_utr	WBGene00016458	C35E7.6	97	56	57.73	50	16	32	-25.73	50	45	90	85	53	62.3529	-27.6471
I 10820477	three_prime_utr	WBGene00016458	C35E7.6	100	4	4	50	4	8	4	23	3	13.0435	86	15	17.4419	4.39838
I 10820478	three_prime_utr	WBGene00016458	C35E7.6	101	8	7.92	50	9	18	10.08	56	14	25	70	7	10	-15
I 10820486	three_prime_utr	WBGene00016458	C35E7.6	102	50	49.02	49	13	26.53	-22.49	57	46	80.7018	98	65	66.3265	-14.3752
I 10820499	three_prime_utr	WBGene00016458	C35E7.6	105	22	20.95	47	4	8.51	-12.44	57	23	40.3509	99	27	27.2727	-13.0781
I 10820508	three_prime_utr	WBGene00016458	C35E7.6	102	24	23.53	46	14	30.43	6.9	60	20	33.3333	106	54	50.9434	17.6101
I 10820510	three_prime_utr	WBGene00016458	C35E7.6	102	7	6.86	47	8	17.02	10.16	28	5	17.8571	105	37	35.2381	17.381
I 10820518	three_prime_utr	WBGene00016458	C35E7.6	109	5	4.59	50	1	2	-2.59	14	1	7.14286	85	9	10.5882	3.44538
I 10820519	three_prime_utr	WBGene00016458	C35E7.6	107	4	3.74	50	1	2	-1.74	33	3	9.09091	29	2	6.89655	-2.19436
I 10820533	three_prime_utr	WBGene00016458	C35E7.6	119	4	3.36	59	2	3.39	0.03	38	2	5.26316	24	1	4.16667	-1.09649
I 10820090	three_prime_utr	WBGene00016458	C35E7.6	40	2	5	30	1	3.33	-1.67	10	4	40	22	3	13.6364	-26.3636
I 10820144	three_prime_utr	WBGene00016458	C35E7.6	69	3	4.35	45	18	40	35.65	38	7	18.4211	46	16	34.7826	16.3616
I 10819241	three_prime_utr	WBGene00016458	C35E7.6	108	19	17.59	79	9	11.39	-6.2	35	7	20	52	7	13.4615	-6.53846
I 10819249	three_prime_utr	WBGene00016458	C35E7.6	106	83	78.3	74	67	90.54	12.24	30	30	100	48	42	87.5	-12.5
I 10819273	three_prime_utr	WBGene00016458	C35E7.6	109	9	8.26	72	10	13.89	5.63	25	9	36	46	13	28.2609	-7.73913
I 10819279	three_prime_utr	WBGene00016458	C35E7.6	105	36	34.29	74	22	29.73	-4.56	23	13	56.5217	49	15	30.6122	-25.9095
I 10819280	three_prime_utr	WBGene00016458	C35E7.6	104	50	48.08	75	28	37.33	-10.75	31	18	58.0645	54	21	38.8889	-19.1756
I 10819281	three_prime_utr	WBGene00016458	C35E7.6	103	12	11.65	75	3	4	-7.65	29	8	27.5862	48	7	14.5833	-13.0029
I 10819285	three_prime_utr	WBGene00016458	C35E7.6	102	20	19.61	72	14	19.44	-0.17	23	4	17.3913	47	10	21.2766	3.88529
I 10819287	three_prime_utr	WBGene00016458	C35E7.6	100	45	45	70	34	48.57	3.57	34	21	61.7647	53	25	47.1698	-14.5949
I 10819293	three_prime_utr	WBGene00016458	C35E7.6	104	13	12.5	72	1	1.39	-11.11	29	11	37.931	0	0	#DIV/0!	#DIV/0!
I 10819300	three_prime_utr	WBGene00016458	C35E7.6	107	11	10.28	66	20	30.3	20.02	13	5	38.4615	45	11	24.4444	-14.0171
I 10819197	three_prime_utr	WBGene00016458	C35E7.6	95	45	47.37	73	15	20.55	-26.82	40	23	57.5	66	14	21.2121	-36.2879
I 10819198	three_prime_utr	WBGene00016458	C35E7.6	98	19	19.39	74	6	8.11	-11.28	32	13	40.625	35	3	8.57143	-32.0536
I 10819199	three_prime_utr	WBGene00016458	C35E7.6	99	13	13.13	74	12	16.22	3.09	14	3	21.4286	66	9	13.6364	-7.79221
I 10819204	three_prime_utr	WBGene00016458	C35E7.6	97	6	6.19	75	1	1.33	-4.86	8	1	12.5	0	0	#DIV/0!	#DIV/0!
I 10819207	three_prime_utr	WBGene00016458	C35E7.6	96	24	25	73	18	24.66	-0.34	41	9	21.9512	74	32	43.2432	21.292
I 10819209	three_prime_utr	WBGene00016458	C35E7.6	97	9	9.28	73	13	17.81	8.53	32	4	12.5	71	17	23.9437	11.4437
I 10819222	three_prime_utr	WBGene00016458	C35E7.6	102	18	17.65	75	7	9.33	-8.32	44	12	27.2727	73	6	8.21918	-19.0535
I 10819232	three_prime_utr	WBGene00016458	C35E7.6	107	12	11.21	82	15	18.29	7.08	39	11	28.2051	66	14	21.2121	-6.99301
I 10819235	three_prime_utr	WBGene00016458	C35E7.6	108	23	21.3	80	12	15	-6.3	40	11	27.5	62	7	11.2903	-16.2097
I 10819240	three_prime_utr	WBGene00016458	C35E7.6	108	24	22.22	79	10	12.66	-9.56	17	5	29.4118	39	4	10.2564	-19.1554
I 10819299	three_prime_utr	WBGene00016458	C35E7.6	107	18	16.82	67	21	31.34	14.52	12	6	50	42	18	42.8571	-7.14286
I 10819367	three_prime_utr	WBGene00016458	C35E7.6	99	4	4.04	70	5	7.14	3.1	21	3	14.2857	49	7	14.2857	0
I 10819385	three_prime_utr	WBGene00016458	C35E7.6	85	16	18.82	65	20	30.77	11.95	39	21	53.8462	38	12	31.5789	-22.2672
I 10819391	three_prime_utr	WBGene00016458	C35E7.6	81	30	37.04	60	36	60	22.96	43	20	46.5116	49	27	55.102	8.59041
I 10819392	three_prime_utr	WBGene00016458	C35E7.6	77	64	83.12	59	56	94.92	11.8	43	39	90.6977	48	42	87.5	-3.19767
I 10819393	three_prime_utr	WBGene00016458	C35E7.6	82	12	14.63	60	2	3.33	-11.3	41	7	17.0732	41	4	9.7561	-7.31707
I 10819399	three_prime_utr	WBGene00016458	C35E7.6	84	7	8.33	60	7	11.67	3.34	42	5	11.9048	52	13	25	13.0952
I 10819400	three_prime_utr	WBGene00016458	C35E7.6	83	30	36.14	60	31	51.67	15.53	44	18	40.9091	52	32	61.5385	20.6294
I 10819366	three_prime_utr	WBGene00016458	C35E7.6	99	8	8.08	70	8	11.43	3.35	31	8	25.8065	50	9	18	-7.80645
I 10819365	three_prime_utr	WBGene00016458	C35E7.6	100	7	7	71	4	5.63	-1.37	32	10	31.25	27	4	14.8148	-16.4352
I 10819302	three_prime_utr	WBGene00016458	C35E7.6	107	14	13.08	68	7	10.29	-2.79	17	4	23.5294	40	6	15	-8.52941
I 10819307	three_prime_utr	WBGene00016458	C35E7.6	102	32	31.37	70	5	7.14	-24.23	17	12	70.5882	44	10	22.7273	-47.861
I 10819308	three_prime_utr	WBGene00016458	C35E7.6	102	12	11.76	69	11	15.94	4.18	17	5	29.4118	45	9	20	-9.41176
I 10819309	three_prime_utr	WBGene00016458	C35E7.6	102	19	18.63	68	19	27.94	9.31	15	6	40	45	13	28.8889	-11.1111
I 10819310	three_prime_utr	WBGene00016458	C35E7.6	102	15	14.71	68	8	11.76	-2.95	18	4	22.2222	24	4	16.6667	-5.55556
I 10819314	three_prime_utr	WBGene00016458	C35E7.6	101	68	67.33	67	57	85.07	17.74	24	18	75	48	39	81.25	6.25
I 10819330	three_prime_utr	WBGene00016458	C35E7.6	95	32	33.68	68	20	29.41	-4.27	31	8	25.8065	41	13	31.7073	5.90087
I 10819332	three_prime_utr	WBGene00016458	C35E7.6	93	13	13.98	66	22	33.33	19.35	34	15	44.1176	45	26	57.7778	13.6601
I 10819352	three_prime_utr	WBGene00016458	C35E7.6	98	17	17.35	72	3	4.17	-13.18	32	9	28.125	14	1	7.14286	-20.9821
I 10819353	three_prime_utr	WBGene00016458	C35E7.6	98	20	20.41	73	2	2.74	-17.67	30	15	50	28	3	10.7143	-39.2857
I 10819354	three_prime_utr	WBGene00016458	C35E7.6	98	20	20.41	72	12	16.67	-3.74	32	15	46.875	40	8	20	-26.875
I 10819355	three_prime_utr	WBGene00016458	C35E7.6	98	10	10.2	72	3	4.17	-6.03	22	4	18.1818	13	1	7.69231	-10.4895
I 10819196	three_prime_utr	WBGene00016458	C35E7.6	95	11	11.58	73	2	2.74	-8.84	30	5	16.6667	66	6	9.09091	-7.57576
I 10819156	three_prime_utr	WBGene00016458	C35E7.6	92	26	28.26	70	16	22.86	-5.4	61	20	32.7869	96	50	52.0833	19.2964
I 10819158	three_prime_utr	WBGene00016458	C35E7.6	93	24	25.81	70	12	17.14	-8.67	61	18	29.5082	96	17	17.7083	-11.7999
I 10819180	three_prime_utr	WBGene00016458	C35E7.6	92	42	45.65	68	9	13.24	-32.41	55	30	54.5455	64	13	20.3125	-34.233
I 10819194	three_prime_utr	WBGene00016458	C35E7.6	93	55	59.14	73	17	23.29	-35.85	41	23	56.0976	76	25	32.8947	-23.2028
I 10819195	three_prime_utr	WBGene00016458	C35E7.6	95	15	15.79	73	10	13.7	-2.09	32	6	18.75	65	12	18.4615	-0.288462
I 10819417	three_prime_utr	WBGene00016458	C35E7.6	93	26	27.96	63	25	39.68	11.72	47	27	57.4468	60	23	38.3333	-19.1135
I 10819897	three_prime_utr	WBGene00016458	C35E7.6	140	17	12.14	81	19	23.46	11.32	10	2	20	76	31	40.7895	20.7895
I 10819911	three_prime_utr	WBGene00016458	C35E7.6	135	13	9.63	77	20	25.97	16.34	12	2	16.6667	90	36	40	23.3333
I 10819912	three_prime_utr	WBGene00016458	C35E7.6	135	15	11.11	77	27	35.06	23.95	24	6	25	90	50	55.5556	30.5556
I 10819939	three_prime_utr	WBGene00016458	C35E7.6	123	21	17.07	64	13	20.31	3.24	31	7	22.5806	101	19	18.8119	-3.76876
I 10819940	three_prime_utr	WBGene00016458	C35E7.6	122	28	22.95	63	9	14.29	-8.66	34	17	50	70	9	12.8571	-37.1429
I 10819728	three_prime_utr	WBGene00016458	C35E7.6	112	16	14.29	82	15	18.29	4	50	16	32	101	41	40.5941	8.59406
I 10819732	three_prime_utr	WBGene00016458	C35E7.6	117	47	40.17	82	27	32.93	-7.24	52	25	48.0769	106	40	37.7358	-10.3411
I 10819737	three_prime_utr	WBGene00016458	C35E7.6	119	12	10.08	85	1	1.18	-8.9	34	2	5.88235	60	3	5	-0.882353
I 10819741	three_prime_utr	WBGene00016458	C35E7.6	121	16	13.22	87	30	34.48	21.26	56	12	21.4286	110	55	50	28.5714
I 10819760	three_prime_utr	WBGene00016458	C35E7.6	123	24	19.51	87	25	28.74	9.23	50	12	24	114	61	53.5088	29.5088
I 10819761	three_prime_utr	WBGene00016458	C35E7.6	123	27	21.95	86	48	55.81	33.86	50	16	32	111	79	71.1712	39.1712
I 10819769	three_prime_utr	WBGene00016458	C35E7.6	121	35	28.93	86	8	9.3	-19.63	35	14	40	114	39	34.2105	-5.78947
I 10819770	three_prime_utr	WBGene00016458	C35E7.6	122	47	38.52	85	37	43.53	5.01	44	18	40.9091	114	63	55.2632	14.3541
I 10819941	three_prime_utr	WBGene00016458	C35E7.6	121	25	20.66	62	9	14.52	-6.14	38	14	36.8421	84	11	13.0952	-23.7469
I 10819943	three_prime_utr	WBGene00016458	C35E7.6	119	73	61.34	61	56	91.8	30.46	38	38	100	100	97	97	-3
I 10819963	three_prime_utr	WBGene00016458	C35E7.6	103	5	4.85	60	1	1.67	-3.18	28	6	21.4286	59	4	6.77966	-14.6489
I 10819504	three_prime_utr	WBGene00016458	C35E7.6	107	74	69.16	64	43	67.19	-1.97	46	33	71.7391	69	52	75.3623	3.62319
I 10819506	three_prime_utr	WBGene00016458	C35E7.6	108	15	13.89	64	1	1.56	-12.33	38	11	28.9474	16	1	6.25	-22.6974
I 10819518	three_prime_utr	WBGene00016458	C35E7.6	103	52	50.49	61	9	14.75	-35.74	47	29	61.7021	75	19	25.3333	-36.3688
I 10819522	three_prime_utr	WBGene00016458	C35E7.6	104	26	25	61	13	21.31	-3.69	46	11	23.913	73	11	15.0685	-8.84455
I 10819532	three_prime_utr	WBGene00016458	C35E7.6	108	11	10.19	58	1	1.72	-8.47	43	6	13.9535	41	5	12.1951	-1.75837
I 10819533	three_prime_utr	WBGene00016458	C35E7.6	109	22	20.18	58	13	22.41	2.23	51	12	23.5294	76	23	30.2632	6.73375
I 10819544	three_prime_utr	WBGene00016458	C35E7.6	109	22	20.18	62	6	9.68	-10.5	49	15	30.6122	88	22	25	-5.61224
I 10819550	three_prime_utr	WBGene00016458	C35E7.6	109	9	8.26	64	3	4.69	-3.57	56	12	21.4286	68	10	14.7059	-6.72269
I 10819555	three_prime_utr	WBGene00016458	C35E7.6	107	9	8.41	63	2	3.17	-5.24	38	5	13.1579	98	14	14.2857	1.12782
I 10819724	three_prime_utr	WBGene00016458	C35E7.6	111	6	5.41	80	5	6.25	0.84	40	4	10	58	8	13.7931	3.7931
I 10819419	three_prime_utr	WBGene00016458	C35E7.6	93	5	5.38	64	1	1.56	-3.82	18	1	5.55556	31	2	6.45161	0.896057
I 10819453	three_prime_utr	WBGene00016458	C35E7.6	98	5	5.1	66	4	6.06	0.96	34	2	5.88235	48	10	20.8333	14.951
I 10819454	three_prime_utr	WBGene00016458	C35E7.6	98	5	5.1	68	2	2.94	-2.16	26	3	11.5385	48	13	27.0833	15.5449
I 10819463	three_prime_utr	WBGene00016458	C35E7.6	99	67	67.68	68	41	60.29	-7.39	53	48	90.566	57	43	75.4386	-15.1274
I 10819464	three_prime_utr	WBGene00016458	C35E7.6	99	5	5.05	68	20	29.41	24.36	44	11	25	58	13	22.4138	-2.58621
I 10819473	three_prime_utr	WBGene00016458	C35E7.6	106	36	33.96	70	6	8.57	-25.39	42	22	52.381	55	11	20	-32.381
I 10819480	three_prime_utr	WBGene00016458	C35E7.6	108	19	17.59	69	14	20.29	2.7	43	11	25.5814	54	16	29.6296	4.04823
I 10819484	three_prime_utr	WBGene00016458	C35E7.6	108	69	63.89	71	39	54.93	-8.96	44	36	81.8182	55	34	61.8182	-20
I 10819485	three_prime_utr	WBGene00016458	C35E7.6	109	16	14.68	73	4	5.48	-9.2	45	16	35.5556	56	10	17.8571	-17.6984
I 10819487	three_prime_utr	WBGene00016458	C35E7.6	109	12	11.01	74	3	4.05	-6.96	9	1	11.1111	29	4	13.7931	2.68199
I 10819488	three_prime_utr	WBGene00016458	C35E7.6	111	12	10.81	73	11	15.07	4.26	17	6	35.2941	60	13	21.6667	-13.6275
I 10819496	three_prime_utr	WBGene00016458	C35E7.6	112	11	9.82	70	1	1.43	-8.39	45	6	13.3333	0	0	#DIV/0!	#DIV/0!
I 10819560	three_prime_utr	WBGene00016458	C35E7.6	108	11	10.19	68	9	13.24	3.05	69	13	18.8406	100	22	22	3.15942
I 10819565	three_prime_utr	WBGene00016458	C35E7.6	106	22	20.75	68	3	4.41	-16.34	75	22	29.3333	81	14	17.284	-12.0494
I 10819622	three_prime_utr	WBGene00016458	C35E7.6	100	24	24	54	13	24.07	0.07	91	15	16.4835	160	31	19.375	2.89148
I 10819633	three_prime_utr	WBGene00016458	C35E7.6	101	16	15.84	60	7	11.67	-4.17	56	6	10.7143	111	5	4.5045	-6.20978
I 10819636	three_prime_utr	WBGene00016458	C35E7.6	104	50	48.08	59	2	3.39	-44.69	74	18	24.3243	135	15	11.1111	-13.2132
I 10819642	three_prime_utr	WBGene00016458	C35E7.6	102	67	65.69	59	16	27.12	-38.57	84	30	35.7143	150	42	28	-7.71429
I 10819656	three_prime_utr	WBGene00016458	C35E7.6	97	87	89.69	62	58	93.55	3.86	77	74	96.1039	130	129	99.2308	3.12687
I 10819667	three_prime_utr	WBGene00016458	C35E7.6	102	74	72.55	65	15	23.08	-49.47	74	40	54.0541	126	27	21.4286	-32.6255
I 10819683	three_prime_utr	WBGene00016458	C35E7.6	107	8	7.48	72	10	13.89	6.41	58	6	10.3448	103	21	20.3883	10.0435
I 10819693	three_prime_utr	WBGene00016458	C35E7.6	105	80	76.19	67	20	29.85	-46.34	49	38	77.551	83	46	55.4217	-22.1293
I 10819697	three_prime_utr	WBGene00016458	C35E7.6	107	5	4.67	72	7	9.72	5.05	44	3	6.81818	63	8	12.6984	5.88023
I 10819698	three_prime_utr	WBGene00016458	C35E7.6	107	34	31.78	73	21	28.77	-3.01	49	25	51.0204	85	55	64.7059	13.6855
I 10819721	three_prime_utr	WBGene00016458	C35E7.6	109	95	87.16	77	74	96.1	8.94	51	51	100	93	92	98.9247	-1.07527
I 10819620	three_prime_utr	WBGene00016458	C35E7.6	100	16	16	55	11	20	4	78	12	15.3846	161	26	16.1491	0.764453
I 10819619	three_prime_utr	WBGene00016458	C35E7.6	101	5	4.95	55	13	23.64	18.69	92	7	7.6087	162	29	17.9012	10.2925
I 10819580	three_prime_utr	WBGene00016458	C35E7.6	97	57	58.76	58	16	27.59	-31.17	69	39	56.5217	107	31	28.972	-27.5498
I 10819581	three_prime_utr	WBGene00016458	C35E7.6	97	50	51.55	58	32	55.17	3.62	66	37	56.0606	108	55	50.9259	-5.13468
I 10819584	three_prime_utr	WBGene00016458	C35E7.6	99	30	30.3	57	13	22.81	-7.49	73	23	31.5068	111	29	26.1261	-5.38072
I 10819586	three_prime_utr	WBGene00016458	C35E7.6	99	20	20.2	57	10	17.54	-2.66	52	8	15.3846	114	22	19.2982	3.91363
I 10819595	three_prime_utr	WBGene00016458	C35E7.6	98	11	11.22	59	12	20.34	9.12	86	11	12.7907	117	29	24.7863	11.9956
I 10819596	three_prime_utr	WBGene00016458	C35E7.6	97	15	15.46	59	14	23.73	8.27	76	11	14.4737	117	19	16.2393	1.76563
I 10819607	three_prime_utr	WBGene00016458	C35E7.6	102	15	14.71	57	8	14.04	-0.67	60	5	8.33333	108	8	7.40741	-0.925926
I 10819616	three_prime_utr	WBGene00016458	C35E7.6	101	10	9.9	56	4	7.14	-2.76	80	8	10	109	9	8.25688	-1.74312
I 10819498	three_prime_utr	WBGene00016458	C35E7.6	113	4	3.54	68	1	1.47	-2.07	31	7	22.5806	31	3	9.67742	-12.9032
II 3922541	three_prime_utr	WBGene00018756	F53C3.13	16	13	81.25	1	1	100	18.75	7	5	71.4286	2	2	100	28.5714
V 4627710	three_prime_utr	WBGene00018812	sumv-2	26	24	92.31	7	3	42.86	-49.45	10	10	100	21	13	61.9048	-38.0952
V 8924041	three_prime_utr	WBGene00019204	H14N18.4	10	5	50	2	1	50	0	6	4	66.6667	8	6	75	8.33333
V 8924340	three_prime_utr	WBGene00019204	H14N18.4	25	12	48	5	3	60	12	14	5	35.7143	12	5	41.6667	5.95238
III 850851	three_prime_utr	WBGene00019326	K02F3.2	60	4	6.67	18	3	16.67	10	12	2	16.6667	9	2	22.2222	5.55556
V 2646597	three_prime_utr	WBGene00020957	W02H5.2	6	3	50	4	1	25	-25	5	5	100	20	4	20	-80
V 2646612	three_prime_utr	WBGene00020957	W02H5.2	6	4	66.67	4	4	100	33.33	8	8	100	25	24	96	-4
V 2646820	three_prime_utr	WBGene00020957	W02H5.2	17	12	70.59	2	1	50	-20.59	9	5	55.5556	28	27	96.4286	40.873
V 2646522	three_prime_utr	WBGene00020957	W02H5.2	13	3	23.08	4	3	75	51.92	9	3	33.3333	28	9	32.1429	-1.19048
V 2646531	three_prime_utr	WBGene00020957	W02H5.2	13	10	76.92	4	3	75	-1.92	10	10	100	30	24	80	-20
V 2646535	three_prime_utr	WBGene00020957	W02H5.2	13	6	46.15	4	3	75	28.85	10	9	90	30	15	50	-40
V 2646532	three_prime_utr	WBGene00020957	W02H5.2	13	10	76.92	4	4	100	23.08	10	10	100	30	28	93.3333	-6.66667
I 2034042	three_prime_utr	WBGene00021237	crtc-1	30	25	83.33	7	3	42.86	-40.47	9	9	100	32	26	81.25	-18.75
I 2034085	three_prime_utr	WBGene00021237	crtc-1	35	18	51.43	5	4	80	28.57	11	6	54.5455	34	26	76.4706	21.9251
I 2033879	three_prime_utr	WBGene00021237	crtc-1	62	6	9.68	27	1	3.7	-5.98	21	3	14.2857	6	1	16.6667	2.38095
I 2033878	three_prime_utr	WBGene00021237	crtc-1	62	43	69.35	27	7	25.93	-43.42	34	26	76.4706	32	16	50	-26.4706
I 2033881	three_prime_utr	WBGene00021237	crtc-1	61	7	11.48	27	2	7.41	-4.07	24	8	33.3333	14	2	14.2857	-19.0476
I 2033888	three_prime_utr	WBGene00021237	crtc-1	56	20	35.71	24	3	12.5	-23.21	32	19	59.375	45	9	20	-39.375
I 2033893	three_prime_utr	WBGene00021237	crtc-1	53	2	3.77	21	1	4.76	0.99	30	9	30	6	1	16.6667	-13.3333
I 2033866	three_prime_utr	WBGene00021237	crtc-1	70	2	2.86	32	1	3.12	0.26	25	5	20	17	2	11.7647	-8.23529
I 2076640	three_prime_utr	WBGene00021351	Y37E3.10	20	16	80	9	1	11.11	-68.89	33	32	96.9697	97	21	21.6495	-75.3202
I 2076609	three_prime_utr	WBGene00021351	Y37E3.10	18	4	22.22	8	3	37.5	15.28	28	14	50	86	42	48.8372	-1.16279
I 2076610	three_prime_utr	WBGene00021351	Y37E3.10	18	4	22.22	8	5	62.5	40.28	31	23	74.1935	87	44	50.5747	-23.6188
I 2076629	three_prime_utr	WBGene00021351	Y37E3.10	19	6	31.58	9	5	55.56	23.98	34	27	79.4118	92	43	46.7391	-32.6726
I 2076630	three_prime_utr	WBGene00021351	Y37E3.10	19	7	36.84	9	3	33.33	-3.51	34	16	47.0588	92	20	21.7391	-25.3197
I 2076411	three_prime_utr	WBGene00021351	Y37E3.10	36	9	25	5	1	20	-5	54	17	31.4815	83	8	9.63855	-21.8429
I 2076410	three_prime_utr	WBGene00021351	Y37E3.10	37	14	37.84	5	3	60	22.16	48	16	33.3333	115	25	21.7391	-11.5942
I 2076639	three_prime_utr	WBGene00021351	Y37E3.10	20	10	50	9	3	33.33	-16.67	28	14	50	97	17	17.5258	-32.4742
I 2076643	three_prime_utr	WBGene00021351	Y37E3.10	20	9	45	9	1	11.11	-33.89	34	16	47.0588	98	30	30.6122	-16.4466
I 2076644	three_prime_utr	WBGene00021351	Y37E3.10	20	10	50	9	2	22.22	-27.78	27	6	22.2222	98	35	35.7143	13.4921
I 2076645	three_prime_utr	WBGene00021351	Y37E3.10	20	4	20	9	2	22.22	2.22	30	7	23.3333	101	23	22.7723	-0.561056
I 2076648	three_prime_utr	WBGene00021351	Y37E3.10	20	8	40	10	1	10	-30	19	7	36.8421	76	11	14.4737	-22.3684
I 2076655	three_prime_utr	WBGene00021351	Y37E3.10	21	4	19.05	12	1	8.33	-10.72	35	8	22.8571	84	8	9.52381	-13.3333
I 2076668	three_prime_utr	WBGene00021351	Y37E3.10	20	5	25	11	1	9.09	-15.91	43	23	53.4884	71	10	14.0845	-39.4039
I 2076680	three_prime_utr	WBGene00021351	Y37E3.10	23	4	17.39	10	1	10	-7.39	33	5	15.1515	98	7	7.14286	-8.00866
I 2076633	three_prime_utr	WBGene00021351	Y37E3.10	19	1	5.26	9	1	11.11	5.85	27	6	22.2222	99	17	17.1717	-5.05051
I 2076409	three_prime_utr	WBGene00021351	Y37E3.10	37	2	5.41	5	1	20	14.59	48	5	10.4167	83	8	9.63855	-0.778112
I 2076702	three_prime_utr	WBGene00021351	Y37E3.10	28	9	32.14	10	2	20	-12.14	43	23	53.4884	106	27	25.4717	-28.0167
I 2076364	three_prime_utr	WBGene00021351	Y37E3.10	46	40	86.96	5	2	40	-46.96	69	55	79.7101	148	105	70.9459	-8.7642
I 2076363	three_prime_utr	WBGene00021351	Y37E3.10	46	43	93.48	5	4	80	-13.48	68	61	89.7059	148	92	62.1622	-27.5437
I 2296739	three_prime_utr	WBGene00021469	Y39G10AR.11	86	19	22.09	48	1	2.08	-20.01	17	10	58.8235	2	1	50	-8.82353
I 2296746	three_prime_utr	WBGene00021469	Y39G10AR.11	81	26	32.1	47	7	14.89	-17.21	16	11	68.75	36	4	11.1111	-57.6389
I 2296758	three_prime_utr	WBGene00021469	Y39G10AR.11	74	29	39.19	44	27	61.36	22.17	15	9	60	53	39	73.5849	13.5849
I 2296759	three_prime_utr	WBGene00021469	Y39G10AR.11	74	11	14.86	44	10	22.73	7.87	9	4	44.4444	40	12	30	-14.4444
I 2297010	three_prime_utr	WBGene00021469	Y39G10AR.11	76	16	21.05	25	8	32	10.95	8	7	87.5	27	10	37.037	-50.463
I 2296770	three_prime_utr	WBGene00021469	Y39G10AR.11	66	6	9.09	40	9	22.5	13.41	8	2	25	55	13	23.6364	-1.36364
I 2296771	three_prime_utr	WBGene00021469	Y39G10AR.11	65	9	13.85	39	9	23.08	9.23	15	5	33.3333	54	16	29.6296	-3.7037
I 2296779	three_prime_utr	WBGene00021469	Y39G10AR.11	64	11	17.19	37	6	16.22	-0.97	12	6	50	36	5	13.8889	-36.1111
I 2296917	three_prime_utr	WBGene00021469	Y39G10AR.11	64	19	29.69	18	4	22.22	-7.47	5	3	60	7	3	42.8571	-17.1429
I 2296937	three_prime_utr	WBGene00021469	Y39G10AR.11	62	34	54.84	18	5	27.78	-27.06	6	4	66.6667	5	1	20	-46.6667
I 2296938	three_prime_utr	WBGene00021469	Y39G10AR.11	62	48	77.42	18	6	33.33	-44.09	6	5	83.3333	9	3	33.3333	-50
I 2296765	three_prime_utr	WBGene00021469	Y39G10AR.11	69	3	4.35	41	1	2.44	-1.91	9	5	55.5556	33	4	12.1212	-43.4343
I 2296730	three_prime_utr	WBGene00021469	Y39G10AR.11	88	8	9.09	46	3	6.52	-2.57	16	4	25	14	3	21.4286	-3.57143
I 2296703	three_prime_utr	WBGene00021469	Y39G10AR.11	96	68	70.83	40	4	10	-60.83	16	14	87.5	27	6	22.2222	-65.2778
I 2296700	three_prime_utr	WBGene00021469	Y39G10AR.11	97	29	29.9	39	3	7.69	-22.21	10	1	10	14	4	28.5714	18.5714
I 2296697	three_prime_utr	WBGene00021469	Y39G10AR.11	95	42	44.21	38	10	26.32	-17.89	14	7	50	29	10	34.4828	-15.5172
I 2296727	three_prime_utr	WBGene00021469	Y39G10AR.11	89	35	39.33	45	4	8.89	-30.44	17	12	70.5882	26	6	23.0769	-47.5113
I 2296726	three_prime_utr	WBGene00021469	Y39G10AR.11	89	7	7.87	45	2	4.44	-3.43	16	7	43.75	11	1	9.09091	-34.6591
I 2296719	three_prime_utr	WBGene00021469	Y39G10AR.11	92	40	43.48	43	5	11.63	-31.85	16	8	50	26	5	19.2308	-30.7692
I 2296715	three_prime_utr	WBGene00021469	Y39G10AR.11	95	11	11.58	41	6	14.63	3.05	10	1	10	27	9	33.3333	23.3333
I 2296711	three_prime_utr	WBGene00021469	Y39G10AR.11	96	33	34.38	41	2	4.88	-29.5	16	4	25	14	1	7.14286	-17.8571
I 2296688	three_prime_utr	WBGene00021469	Y39G10AR.11	97	25	25.77	37	6	16.22	-9.55	8	4	50	11	2	18.1818	-31.8182
I 2296686	three_prime_utr	WBGene00021469	Y39G10AR.11	96	31	32.29	37	5	13.51	-18.78	6	1	16.6667	21	8	38.0952	21.4286
V 3749612	three_prime_utr	WBGene00021482	Y39H10A.6	38	24	63.16	4	1	25	-38.16	9	4	44.4444	22	6	27.2727	-17.1717
V 3749654	three_prime_utr	WBGene00021482	Y39H10A.6	12	3	25	5	1	20	-5	10	3	30	7	3	42.8571	12.8571
V 3749665	three_prime_utr	WBGene00021482	Y39H10A.6	13	2	15.38	6	1	16.67	1.29	7	3	42.8571	20	7	35	-7.85714
V 3749666	three_prime_utr	WBGene00021482	Y39H10A.6	13	2	15.38	5	1	20	4.62	11	6	54.5455	20	10	50	-4.54545
V 3749589	three_prime_utr	WBGene00021482	Y39H10A.6	47	10	21.28	6	1	16.67	-4.61	6	1	16.6667	0	0	#DIV/0!	#DIV/0!
V 3749543	three_prime_utr	WBGene00021482	Y39H10A.6	51	36	70.59	5	3	60	-10.59	11	7	63.6364	9	5	55.5556	-8.08081
V 3749555	three_prime_utr	WBGene00021482	Y39H10A.6	50	21	42	5	4	80	38	12	8	66.6667	11	11	100	33.3333
V 3749556	three_prime_utr	WBGene00021482	Y39H10A.6	50	17	34	5	2	40	6	12	3	25	15	13	86.6667	61.6667
V 3749583	three_prime_utr	WBGene00021482	Y39H10A.6	52	5	9.62	6	3	50	40.38	9	2	22.2222	17	4	23.5294	1.30719
V 3749953	three_prime_utr	WBGene00021482	Y39H10A.6	33	24	72.73	5	1	20	-52.73	5	4	80	14	6	42.8571	-37.1429
V 3749967	three_prime_utr	WBGene00021482	Y39H10A.6	38	9	23.68	12	1	8.33	-15.35	7	5	71.4286	0	0	#DIV/0!	#DIV/0!
V 3750001	three_prime_utr	WBGene00021482	Y39H10A.6	45	5	11.11	16	1	6.25	-4.86	5	2	40	0	0	#DIV/0!	#DIV/0!
V 3749998	three_prime_utr	WBGene00021482	Y39H10A.6	43	16	37.21	16	6	37.5	0.29	14	6	42.8571	20	9	45	2.14286
V 3750005	three_prime_utr	WBGene00021482	Y39H10A.6	44	4	9.09	15	5	33.33	24.24	17	10	58.8235	19	5	26.3158	-32.5077
V 3750012	three_prime_utr	WBGene00021482	Y39H10A.6	43	29	67.44	14	12	85.71	18.27	18	12	66.6667	20	14	70	3.33333
V 3750058	three_prime_utr	WBGene00021482	Y39H10A.6	52	11	21.15	16	1	6.25	-14.9	19	10	52.6316	22	10	45.4545	-7.17703
V 3750060	three_prime_utr	WBGene00021482	Y39H10A.6	53	12	22.64	16	2	12.5	-10.14	16	6	37.5	3	1	33.3333	-4.16667
V 3750078	three_prime_utr	WBGene00021482	Y39H10A.6	56	10	17.86	16	2	12.5	-5.36	20	5	25	18	8	44.4444	19.4444
V 3750013	three_prime_utr	WBGene00021482	Y39H10A.6	44	26	59.09	14	9	64.29	5.2	18	18	100	20	18	90	-10
V 3750024	three_prime_utr	WBGene00021482	Y39H10A.6	45	7	15.56	13	3	23.08	7.52	15	9	60	15	5	33.3333	-26.6667
V 3750085	three_prime_utr	WBGene00021482	Y39H10A.6	57	4	7.02	17	4	23.53	16.51	18	4	22.2222	4	1	25	2.77778
V 3750147	three_prime_utr	WBGene00021482	Y39H10A.6	78	5	6.41	16	2	12.5	6.09	19	4	21.0526	0	0	#DIV/0!	#DIV/0!
V 3750089	three_prime_utr	WBGene00021482	Y39H10A.6	58	7	12.07	17	1	5.88	-6.19	19	4	21.0526	15	2	13.3333	-7.7193
V 3750090	three_prime_utr	WBGene00021482	Y39H10A.6	59	5	8.47	18	2	11.11	2.64	14	1	7.14286	15	4	26.6667	19.5238
V 3750108	three_prime_utr	WBGene00021482	Y39H10A.6	63	19	30.16	20	3	15	-15.16	27	14	51.8519	4	2	50	-1.85185
V 3750117	three_prime_utr	WBGene00021482	Y39H10A.6	63	41	65.08	16	8	50	-15.08	25	17	68	28	15	53.5714	-14.4286
V 3750123	three_prime_utr	WBGene00021482	Y39H10A.6	66	16	24.24	15	5	33.33	9.09	14	9	64.2857	28	12	42.8571	-21.4286
V 3750124	three_prime_utr	WBGene00021482	Y39H10A.6	67	26	38.81	15	11	73.33	34.52	17	10	58.8235	20	13	65	6.17647
V 3750019	three_prime_utr	WBGene00021482	Y39H10A.6	44	1	2.27	14	3	21.43	19.16	15	4	26.6667	15	5	33.3333	6.66667
V 3750107	three_prime_utr	WBGene00021482	Y39H10A.6	63	2	3.17	20	1	5	1.83	19	3	15.7895	11	1	9.09091	-6.69856
I 3034180	three_prime_utr	WBGene00021841	Y54E10BR.2	10	5	50	4	2	50	0	6	6	100	21	10	47.619	-52.381
I 3034547	three_prime_utr	WBGene00021841	Y54E10BR.2	14	12	85.71	2	1	50	-35.71	10	5	50	72	60	83.3333	33.3333
I 3034567	three_prime_utr	WBGene00021841	Y54E10BR.2	15	11	73.33	1	1	100	26.67	20	19	95	67	24	35.8209	-59.1791
I 3034568	three_prime_utr	WBGene00021841	Y54E10BR.2	15	11	73.33	1	1	100	26.67	15	14	93.3333	69	17	24.6377	-68.6957
I 3034599	three_prime_utr	WBGene00021841	Y54E10BR.2	17	2	11.76	1	1	100	88.24	8	1	12.5	36	10	27.7778	15.2778
I 3034605	three_prime_utr	WBGene00021841	Y54E10BR.2	16	5	31.25	1	1	100	68.75	21	11	52.381	41	17	41.4634	-10.9175
I 629833	three_prime_utr	WBGene00022029	Y65B4A.6	27	13	48.15	2	2	100	51.85	15	7	46.6667	51	24	47.0588	0.392157
I 630914	three_prime_utr	WBGene00022029	Y65B4A.6	14	8	57.14	2	2	100	42.86	5	2	40	0	0	#DIV/0!	#DIV/0!
I 630994	three_prime_utr	WBGene00022029	Y65B4A.6	23	19	82.61	9	8	88.89	6.28	14	9	64.2857	11	11	100	35.7143
I 630954	three_prime_utr	WBGene00022029	Y65B4A.6	15	3	20	6	4	66.67	46.67	6	6	100	8	4	50	-50
I 630903	three_prime_utr	WBGene00022029	Y65B4A.6	14	8	57.14	2	2	100	42.86	6	6	100	5	4	80	-20
I 631010	three_prime_utr	WBGene00022029	Y65B4A.6	27	18	66.67	11	8	72.73	6.06	19	13	68.4211	21	15	71.4286	3.00752
I 631009	three_prime_utr	WBGene00022029	Y65B4A.6	27	3	11.11	11	3	27.27	16.16	13	5	38.4615	14	4	28.5714	-9.89011
I 631001	three_prime_utr	WBGene00022029	Y65B4A.6	24	4	16.67	9	4	44.44	27.77	10	6	60	5	3	60	0
I 630857	three_prime_utr	WBGene00022029	Y65B4A.6	14	8	57.14	1	1	100	42.86	6	3	50	10	7	70	20
I 630457	three_prime_utr	WBGene00022029	Y65B4A.6	32	23	71.88	9	3	33.33	-38.55	24	22	91.6667	42	11	26.1905	-65.4762
I 630462	three_prime_utr	WBGene00022029	Y65B4A.6	31	4	12.9	9	1	11.11	-1.79	10	2	20	40	8	20	0
I 630458	three_prime_utr	WBGene00022029	Y65B4A.6	32	6	18.75	9	1	11.11	-7.64	18	7	38.8889	0	0	#DIV/0!	#DIV/0!
I 630442	three_prime_utr	WBGene00022029	Y65B4A.6	39	20	51.28	10	3	30	-21.28	24	18	75	45	9	20	-55
I 630406	three_prime_utr	WBGene00022029	Y65B4A.6	43	8	18.6	11	4	36.36	17.76	36	9	25	62	34	54.8387	29.8387
I 630439	three_prime_utr	WBGene00022029	Y65B4A.6	39	16	41.03	10	2	20	-21.03	17	5	29.4118	46	9	19.5652	-9.84655
I 630433	three_prime_utr	WBGene00022029	Y65B4A.6	40	4	10	10	1	10	0	25	4	16	37	3	8.10811	-7.89189
I 630424	three_prime_utr	WBGene00022029	Y65B4A.6	40	8	20	11	3	27.27	7.27	28	8	28.5714	27	6	22.2222	-6.34921
I 630423	three_prime_utr	WBGene00022029	Y65B4A.6	41	24	58.54	11	7	63.64	5.1	29	18	62.069	56	33	58.9286	-3.14039
I 630413	three_prime_utr	WBGene00022029	Y65B4A.6	41	20	48.78	11	4	36.36	-12.42	24	13	54.1667	61	23	37.7049	-16.4617
I 630412	three_prime_utr	WBGene00022029	Y65B4A.6	41	8	19.51	11	3	27.27	7.76	27	8	29.6296	56	26	46.4286	16.7989
I 630410	three_prime_utr	WBGene00022029	Y65B4A.6	42	19	45.24	11	2	18.18	-27.06	28	11	39.2857	53	9	16.9811	-22.3046
I 631011	three_prime_utr	WBGene00022029	Y65B4A.6	27	13	48.15	11	5	45.45	-2.7	19	13	68.4211	21	13	61.9048	-6.51629
I 630455	three_prime_utr	WBGene00022029	Y65B4A.6	33	1	3.03	9	1	11.11	8.08	20	4	20	42	8	19.0476	-0.952381
III 1555755	three_prime_utr	WBGene00022057	Y67D2.7	23	9	39.13	6	3	50	10.87	5	2	40	14	5	35.7143	-4.28571
III 2707578	three_prime_utr	WBGene00022173	set-27	15	8	53.33	1	1	100	46.67	6	3	50	6	2	33.3333	-16.6667
I 1359386	three_prime_utr	WBGene00022363	Y92H12BL.1	29	6	20.69	4	3	75	54.31	9	5	55.5556	42	14	33.3333	-22.2222
I 1359393	three_prime_utr	WBGene00022363	Y92H12BL.1	26	7	26.92	4	2	50	23.08	13	5	38.4615	44	11	25	-13.4615
I 1359400	three_prime_utr	WBGene00022363	Y92H12BL.1	26	15	57.69	4	4	100	42.31	14	8	57.1429	44	23	52.2727	-4.87013
I 1359410	three_prime_utr	WBGene00022363	Y92H12BL.1	21	15	71.43	4	2	50	-21.43	13	12	92.3077	38	9	23.6842	-68.6235
I 1359411	three_prime_utr	WBGene00022363	Y92H12BL.1	21	3	14.29	4	1	25	10.71	5	3	60	25	2	8	-52
I 1359372	three_prime_utr	WBGene00022363	Y92H12BL.1	27	22	81.48	3	1	33.33	-48.15	14	13	92.8571	41	6	14.6341	-78.223
I 1359258	three_prime_utr	WBGene00022363	Y92H12BL.1	28	16	57.14	4	1	25	-32.14	9	8	88.8889	37	4	10.8108	-78.0781
I 1359424	three_prime_utr	WBGene00022363	Y92H12BL.1	24	20	83.33	4	3	75	-8.33	12	11	91.6667	45	45	100	8.33333
I 1359434	three_prime_utr	WBGene00022363	Y92H12BL.1	25	3	12	4	1	25	13	5	3	60	18	4	22.2222	-37.7778
I 1359429	three_prime_utr	WBGene00022363	Y92H12BL.1	24	17	70.83	4	3	75	4.17	12	10	83.3333	37	22	59.4595	-23.8739
I 1358465	three_prime_utr	WBGene00022363	Y92H12BL.1	19	10	52.63	8	2	25	-27.63	5	2	40	18	3	16.6667	-23.3333
I 1358502	three_prime_utr	WBGene00022363	Y92H12BL.1	18	12	66.67	5	4	80	13.33	6	5	83.3333	27	18	66.6667	-16.6667
I 1358501	three_prime_utr	WBGene00022363	Y92H12BL.1	18	13	72.22	5	4	80	7.78	6	6	100	27	11	40.7407	-59.2593
I 1358514	three_prime_utr	WBGene00022363	Y92H12BL.1	20	12	60	6	3	50	-10	5	4	80	25	10	40	-40
I 1358526	three_prime_utr	WBGene00022363	Y92H12BL.1	19	7	36.84	6	1	16.67	-20.17	5	3	60	0	0	#DIV/0!	#DIV/0!
I 1376121	three_prime_utr	WBGene00022366	Y92H12BL.5	39	5	12.82	4	2	50	37.18	5	4	80	14	3	21.4286	-58.5714
I 1376107	three_prime_utr	WBGene00022366	Y92H12BL.5	35	31	88.57	4	1	25	-63.57	5	5	100	6	2	33.3333	-66.6667
IV 2713386	three_prime_utr	WBGene00022379	Y94H6A.7	15	6	40	1	1	100	60	5	5	100	12	8	66.6667	-33.3333
IV 1201655	three_prime_utr	WBGene00022427	Y104H12D.3	26	6	23.08	4	1	25	1.92	6	4	66.6667	3	3	100	33.3333
