# Supplementary material for: Profiling neural editomes reveals a molecular mechanism to regulate RNA editing during development
Source: HighWire-hosted journal article supplement (doi:10.1101/gr.267575.120), 2020-12-18
Supplement: Supplemental_Table_S10.xlsx [file Supplemental_Table_S10.xlsx]

## Sheet: Sheet1
Supplemental Table 10: Sequences of all primers (related to experimental procedures). Primers used in this study for Reverse transcription, PCR amplification, Sanger sequencing and qPCR.
Primer Name	Sequence(5'-3')		Reference number
PCR amplification and Sanger Sequencing
Y75B8A.8_F	GCTGCTGGGATTACACATGG		HH76
Y75B8A.8_R	GTCGACTTTCGCAGCAGCTCCGCACAGAAAA		HH1224
Reverse transcription
Y75B8A.8	GTCGACAAAAGTACAAAAATTATTTACAGG		HH1216
GFP	GTGGACAGGTAATGGTTGTCTGG		HH141
uba-2	GGCCATTGTCTCGGTGATCTCAGCCAC		HH2668
daam-1	GGCCGGAATGAGGTTCTTAGTCGGGAG		HH2673
W07G4.3	GCGATCCATTTGTTCTTTGCGACGAGCTTC		HH2604
lam-2	GAAGCATTTGGTTGGCAAGTTGTCACGG		HH276
qPCR
GFP_F	GGTATCACCTTCAAACTTGACTTCAGC		HH286
GFP_R	GGTGTTCAATGCTTCTCGAGATACCCAGATC		HH287
uba-2_F	CCAGATGTCATGGATTCGGCCACTTCTCG		HH2669
uba-2_R	CCATTTCCTGTTGGAAATCGTCGCAACTC		HH2670
daam-1_F	GCAGTTGTGGGCTGAAGTTGAGGAAGAGG		HH2676
daam-1_R	CTTTTGCTATTCCCCGTCCGGAGGTGTC		HH2677
W07G4.3_F	GGTTGGGATACTCCAATAGCAACTGCCAC		HH1686
W07G4.3_R	CCAATTGTTGGCTTCTTCGCGGCTGCAG		HH1687
lam-2_F	CGTGGGAACTTCCTTGGCAAGTTGTG		HH274
lam-2_R	CCATTCTCGCTGAGGAAGATGAAATCAAG		HH275
adr-1_F	GCAATTTGTTTGCTGCTTTCCTATTGG		HH222
adr-1_R	GAACATTCTGAATCAACGGTGCTAAG		HH223
adr-2_F	GCATGACAATCTATGAGAGCTGTTCCATCG		HH1016
adr-2_R	GCGAAATTTTATGAACTTTGTAAGAACAAC		HH1017
clec-41_F	ACTCTGGAAGATTCTATTCCCCAAGC		HH1515
clec-41_R	CGACTGTAAATGGAAATTGATGCCTGAC		HH1516
daf-2_F	GCAATGGTCGAAACTTGGTGATCCGAACG		HH1848
daf-2_R	GTCTTGGGAATATCTTGGCTGTAGACTTCG		HH1849
ath-1_F	GGGTGGAGCTCTCGCTATTTACGCTGGTCTC		HH2547
ath-1_R	CGTCTGTTCCATGTCCGAGGAAGATTGG		HH2548
kgb-1_F	CGTGATCTCCTGTTCAATATGTTG		HH2553
kgb-1_R	CGGCAAAATCAATTTCCTGATCGTATCG		HH2554
nhr-122_F	GAATATATGGCTATCGTTTGGCTGGCG		HH2719
nhr-122_R	GTTCCTATCGATTTGATAGTTTCGCAACTCC		HH2720
srw-17_F	CCCCTAACTATCAAGATTCAATGGTCGACG		HH2729
srw-17_R	GCATTCTCTTCACTGTGTCCCTATACTGCG		HH2730
